# Supplementary material for: Decoding m6Am by simultaneous transcription-start mapping and methylation quantification
Source: eLife. 2025 Mar 31;13:RP104139. doi: 10.7554/eLife.104139 (PMC11957539; doi:10.7554/eLife.104139)
Supplement: Figure 2—source data 1. [file elife-104139-fig2-data1.xlsx]

## Sheet: Legend
Figure 2 - Source Data 1. A comparison of m6Am mapping methods.
Sheet 1. Overview of different m6Am profiling methods
Sheet 2. Comparing m6Am sites in HEK293T found by different methods

## Sheet: Overview
	CROWN-seq	miCLIP	m6Am-seq	m6ACE-seq	m6Am-exo-seq
Mechanism	m6Am quantification by A-to-I conversion; TSN enrichment and labeling by ReCapping-and-Decapping strategy.	m6A/m6Am identification by immunoprecipitation-crosslinking induced mutations; identifiy TSN by annotations and differential mutational signals between wild-type and PCIF1 knockout cells	m6A/m6Am enrichment by immunoprecipitation from m7G enriched RNA fragments; annotate possible TSNs under m6A/m6Am peaks by CAGE or other annotations	Exonuclease digestion on unprotected RNA 5' ends without anti-m6A/m6Am antibody binding. Require differentail expression comparison between wild-type and PCIF1 knockout cells.	Exonuclease digestion on unprotected RNA 5' ends without anti-m6A/m6Am antibody binding.
Input scale	1-5 μg one round poly(A) selected RNA (~2 μg is recommended) †	10 μg poly(A) RNA	150 ng m7G-cap enriched RNA from 100 μg total RNA	1–5 μg poly(A) RNA	11 μg mRNA
Sensitivity (sites per million mapped reads)‡	1307.05	123.68	6.89	30.06	NA
Single-base resolution	Yes	Yes	No, sites are inferred to the known TSSs within a peak	Yes	No, gene level only
m6Am stoichiometry	Absolute	Relative	Relative	Relative	Not available
De novo TSN call	Yes	No	No	No	No
Prior TSS annotations	Not required	Required	Required	Required	Not required
PCIF1 KO control	Not required	Required	Optional	Required	Optional
† 1 μg one round poly(A) selected RNA equals to ~20 μg total RNA. The poly(A) selected sample contains ~60% rRNA
‡ Estimation: CROWN-seq: by the slope between mapped reads and sites >= 20 reads among all libraries; miCLIP: 2 PCIF1 sample and 1 WT sample, in total 2350 sites and 19 million mapped reads; m6Am-seq, 3 expereimts, 2 WT and 1 PCIF1 KO. Each experiment contains: 1 input, 1 nonFTO-treated_m6A-IP, 1 nonFTO-treated_m7G-IP, 1 FTO-treated_m6A-IP. In total 2073 sites are found from 301 million reads. m6…

## Sheet: m6Am sites
Chr	Position (hg38, 1-based)	Strand	CROWN (high-confidence)	CROWN-seq (>=1 read)	miCLIP	m6ACE-seq	m6Am-seq	Comment
1	925740	+	TRUE	TRUE	FALSE	TRUE	FALSE	Found by CROWN-seq and at least one another method
1	959268	-	TRUE	TRUE	FALSE	TRUE	FALSE	Found by CROWN-seq and at least one another method
1	959282	-	TRUE	TRUE	TRUE	TRUE	FALSE	Found by CROWN-seq and at least one another method
1	1273833	-	TRUE	TRUE	TRUE	TRUE	FALSE	Found by CROWN-seq and at least one another method
1	1308573	+	TRUE	TRUE	FALSE	TRUE	FALSE	Found by CROWN-seq and at least one another method
1	1308594	+	TRUE	TRUE	FALSE	TRUE	FALSE	Found by CROWN-seq and at least one another method
1	1308597	+	TRUE	TRUE	TRUE	FALSE	FALSE	Found by CROWN-seq and at least one another method
1	1313440	+	FALSE	FALSE	FALSE	TRUE	FALSE	Closest annotation >=100 nt
1	1324653	-	TRUE	TRUE	TRUE	FALSE	FALSE	Found by CROWN-seq and at least one another method
1	1349380	-	TRUE	TRUE	FALSE	TRUE	FALSE	Found by CROWN-seq and at least one another method
1	1375200	-	TRUE	TRUE	FALSE	TRUE	FALSE	Found by CROWN-seq and at least one another method
1	1375205	-	TRUE	TRUE	FALSE	TRUE	FALSE	Found by CROWN-seq and at least one another method
1	1375209	-	TRUE	TRUE	TRUE	TRUE	FALSE	Found by CROWN-seq and at least one another method
1	1399336	-	TRUE	TRUE	TRUE	FALSE	FALSE	Found by CROWN-seq and at least one another method
1	1399552	+	FALSE	TRUE	FALSE	TRUE	FALSE	Low coverage
1	1399564	+	FALSE	TRUE	FALSE	TRUE	FALSE	Low coverage
1	1407293	-	TRUE	TRUE	TRUE	FALSE	FALSE	Found by CROWN-seq and at least one another method
1	1471778	+	TRUE	TRUE	FALSE	TRUE	FALSE	Found by CROWN-seq and at least one another method
1	1471791	+	FALSE	TRUE	TRUE	FALSE	FALSE	Low coverage
1	1471836	+	FALSE	TRUE	FALSE	TRUE	FALSE	Low coverage
1	1512162	+	TRUE	TRUE	TRUE	FALSE	FALSE	Found by CROWN-seq and at least one another method
1	1512172	+	FALSE	TRUE	FALSE	TRUE	FALSE	Low coverage
1	1574854	-	TRUE	TRUE	FALSE	TRUE	FALSE	Found by CROWN-seq and at least one another method
1	1891070	-	TRUE	TRUE	TRUE	FALSE	FALSE	Found by CROWN-seq and at least one another method
1	2194772	-	TRUE	TRUE	TRUE	FALSE	FALSE	Found by CROWN-seq and at least one another method
1	2228033	+	FALSE	TRUE	TRUE	TRUE	FALSE	Low coverage
1	2391829	+	TRUE	TRUE	FALSE	TRUE	FALSE	Found by CROWN-seq and at least one another method
1	2412521	-	FALSE	TRUE	TRUE	FALSE	FALSE	Low coverage
1	2526596	-	TRUE	TRUE	TRUE	FALSE	FALSE	Found by CROWN-seq and at least one another method
1	3069183	+	TRUE	TRUE	FALSE	FALSE	TRUE	Found by CROWN-seq and at least one another method
1	3069203	+	TRUE	TRUE	FALSE	FALSE	TRUE	Found by CROWN-seq and at least one another method
1	3733000	+	FALSE	FALSE	FALSE	TRUE	FALSE	Closest annotation >=100 nt
1	3772771	+	TRUE	TRUE	FALSE	FALSE	TRUE	Found by CROWN-seq and at least one another method
1	3857192	-	TRUE	TRUE	TRUE	FALSE	FALSE	Found by CROWN-seq and at least one another method
1	3857211	-	TRUE	TRUE	FALSE	TRUE	FALSE	Found by CROWN-seq and at least one another method
1	3857476	+	FALSE	TRUE	FALSE	TRUE	FALSE	Low coverage
1	3900258	-	TRUE	TRUE	FALSE	TRUE	FALSE	Found by CROWN-seq and at least one another method
1	6235929	-	TRUE	TRUE	FALSE	TRUE	FALSE	Found by CROWN-seq and at least one another method
1	6235986	-	TRUE	TRUE	TRUE	FALSE	FALSE	Found by CROWN-seq and at least one another method
1	6249007	-	FALSE	FALSE	FALSE	TRUE	FALSE	Closest annotation >=100 nt
1	6393358	-	TRUE	TRUE	FALSE	FALSE	TRUE	Found by CROWN-seq and at least one another method
1	6393377	-	TRUE	TRUE	TRUE	FALSE	TRUE	Found by CROWN-seq and at least one another method
1	6393399	-	TRUE	TRUE	FALSE	TRUE	FALSE	Found by CROWN-seq and at least one another method
1	6393418	-	TRUE	TRUE	FALSE	FALSE	TRUE	Found by CROWN-seq and at least one another method
1	6393767	-	TRUE	TRUE	TRUE	FALSE	FALSE	Found by CROWN-seq and at least one another method
1	6625186	+	TRUE	TRUE	TRUE	FALSE	FALSE	Found by CROWN-seq and at least one another method
1	6625205	+	TRUE	TRUE	FALSE	TRUE	FALSE	Found by CROWN-seq and at least one another method
1	7771269	+	TRUE	TRUE	FALSE	FALSE	TRUE	Found by CROWN-seq and at least one another method
1	7771305	+	TRUE	TRUE	FALSE	FALSE	TRUE	Found by CROWN-seq and at least one another method
1	7961677	+	TRUE	TRUE	FALSE	TRUE	FALSE	Found by CROWN-seq and at least one another method
1	7961681	+	TRUE	TRUE	FALSE	TRUE	FALSE	Found by CROWN-seq and at least one another method
1	7961717	+	TRUE	TRUE	TRUE	FALSE	FALSE	Found by CROWN-seq and at least one another method
1	8817590	-	FALSE	TRUE	FALSE	FALSE	TRUE	Low coverage
1	8817640	-	TRUE	TRUE	FALSE	FALSE	TRUE	Found by CROWN-seq and at least one another method
1	8878720	-	TRUE	TRUE	TRUE	FALSE	FALSE	Found by CROWN-seq and at least one another method
1	9150866	-	FALSE	FALSE	FALSE	TRUE	FALSE	Closest annotation >=100 nt
1	9151299	-	FALSE	FALSE	FALSE	TRUE	FALSE	Closest annotation >=100 nt
1	9539489	+	TRUE	TRUE	FALSE	TRUE	FALSE	Found by CROWN-seq and at least one another method
1	9613424	+	FALSE	FALSE	FALSE	TRUE	FALSE	Closest annotation >=100 nt
1	9823960	-	TRUE	TRUE	FALSE	TRUE	FALSE	Found by CROWN-seq and at least one another method
1	9823965	-	TRUE	TRUE	TRUE	TRUE	FALSE	Found by CROWN-seq and at least one another method
1	9943488	+	TRUE	TRUE	FALSE	TRUE	TRUE	Found by CROWN-seq and at least one another method
1	10210570	+	TRUE	TRUE	TRUE	TRUE	FALSE	Found by CROWN-seq and at least one another method
1	10472494	-	TRUE	TRUE	FALSE	TRUE	FALSE	Found by CROWN-seq and at least one another method
1	10474887	+	FALSE	TRUE	FALSE	TRUE	FALSE	Low coverage
1	10474950	+	TRUE	TRUE	FALSE	TRUE	FALSE	Found by CROWN-seq and at least one another method
1	10474954	+	TRUE	TRUE	FALSE	TRUE	TRUE	Found by CROWN-seq and at least one another method
1	10474961	+	TRUE	TRUE	TRUE	FALSE	FALSE	Found by CROWN-seq and at least one another method
1	10796619	-	TRUE	TRUE	FALSE	FALSE	TRUE	Found by CROWN-seq and at least one another method
1	10796648	-	FALSE	TRUE	FALSE	FALSE	TRUE	Low coverage
1	10796653	-	FALSE	TRUE	FALSE	FALSE	TRUE	Low coverage
1	11012654	+	TRUE	TRUE	TRUE	TRUE	FALSE	Found by CROWN-seq and at least one another method
1	11060044	-	TRUE	TRUE	TRUE	FALSE	FALSE	Found by CROWN-seq and at least one another method
1	11099842	-	TRUE	TRUE	FALSE	TRUE	FALSE	Found by CROWN-seq and at least one another method
1	11273510	+	TRUE	TRUE	FALSE	TRUE	FALSE	Found by CROWN-seq and at least one another method
1	11681108	-	TRUE	TRUE	FALSE	TRUE	FALSE	Found by CROWN-seq and at least one another method
1	11806191	+	TRUE	TRUE	FALSE	FALSE	TRUE	Found by CROWN-seq and at least one another method
1	11806231	+	FALSE	TRUE	FALSE	FALSE	TRUE	Low coverage
1	11806241	+	FALSE	FALSE	FALSE	FALSE	TRUE	Closest annotation <100 nt
1	11806249	+	FALSE	TRUE	FALSE	TRUE	FALSE	Low coverage
1	11926406	-	FALSE	TRUE	FALSE	FALSE	TRUE	Low coverage
1	11980446	+	TRUE	TRUE	FALSE	TRUE	TRUE	Found by CROWN-seq and at least one another method
1	12019470	+	TRUE	TRUE	FALSE	TRUE	FALSE	Found by CROWN-seq and at least one another method
1	12019477	+	FALSE	TRUE	FALSE	TRUE	FALSE	Low coverage
1	12019498	+	TRUE	TRUE	FALSE	TRUE	FALSE	Found by CROWN-seq and at least one another method
1	12617628	-	FALSE	TRUE	FALSE	FALSE	TRUE	Low coverage
1	12617682	-	FALSE	TRUE	FALSE	FALSE	TRUE	Low coverage
1	12617693	-	FALSE	TRUE	FALSE	FALSE	TRUE	Low coverage
1	13749395	+	TRUE	TRUE	FALSE	FALSE	TRUE	Found by CROWN-seq and at least one another method
1	13749437	+	TRUE	TRUE	FALSE	TRUE	FALSE	Found by CROWN-seq and at least one another method
1	15409895	+	TRUE	TRUE	FALSE	TRUE	TRUE	Found by CROWN-seq and at least one another method
1	15617458	+	TRUE	TRUE	FALSE	TRUE	FALSE	Found by CROWN-seq and at least one another method
1	15684322	+	TRUE	TRUE	FALSE	TRUE	FALSE	Found by CROWN-seq and at least one another method
1	15834861	-	FALSE	TRUE	FALSE	TRUE	FALSE	Low coverage
1	15847859	+	TRUE	TRUE	FALSE	TRUE	FALSE	Found by CROWN-seq and at least one another method
1	16367214	+	FALSE	FALSE	FALSE	FALSE	TRUE	Closest annotation <100 nt
1	16367243	+	TRUE	TRUE	TRUE	FALSE	FALSE	Found by CROWN-seq and at least one another method
1	16440752	+	TRUE	TRUE	FALSE	TRUE	FALSE	Found by CROWN-seq and at least one another method
1	16613550	-	TRUE	TRUE	FALSE	TRUE	FALSE	Found by CROWN-seq and at least one another method
1	16686251	-	FALSE	TRUE	TRUE	TRUE	FALSE	Low coverage
1	17011928	-	TRUE	TRUE	TRUE	FALSE	FALSE	Found by CROWN-seq and at least one another method
1	17054029	-	TRUE	TRUE	TRUE	FALSE	FALSE	Found by CROWN-seq and at least one another method
1	17438565	-	TRUE	TRUE	TRUE	FALSE	FALSE	Found by CROWN-seq and at least one another method
1	17439671	-	TRUE	TRUE	TRUE	FALSE	FALSE	Found by CROWN-seq and at least one another method
1	18956676	-	TRUE	TRUE	FALSE	TRUE	FALSE	Found by CROWN-seq and at least one another method
1	19210261	-	TRUE	TRUE	TRUE	FALSE	FALSE	Found by CROWN-seq and at least one another method
1	19251550	+	FALSE	TRUE	FALSE	TRUE	FALSE	Low coverage
1	19251592	+	FALSE	TRUE	TRUE	FALSE	FALSE	Low coverage
1	19251805	+	TRUE	TRUE	TRUE	TRUE	FALSE	Found by CROWN-seq and at least one another method
1	19312326	+	TRUE	TRUE	FALSE	TRUE	FALSE	Found by CROWN-seq and at least one another method
1	19485533	-	TRUE	TRUE	TRUE	FALSE	TRUE	Found by CROWN-seq and at least one another method
1	19596990	+	TRUE	TRUE	TRUE	FALSE	TRUE	Found by CROWN-seq and at least one another method
1	20661381	-	FALSE	TRUE	FALSE	TRUE	FALSE	Low coverage
1	20786666	-	TRUE	TRUE	TRUE	TRUE	FALSE	Found by CROWN-seq and at least one another method
1	20787307	-	TRUE	TRUE	FALSE	TRUE	FALSE	Found by CROWN-seq and at least one another method
1	21440137	+	TRUE	TRUE	FALSE	TRUE	FALSE	Found by CROWN-seq and at least one another method
1	22052692	+	TRUE	TRUE	FALSE	TRUE	FALSE	Found by CROWN-seq and at least one another method
1	22052711	+	TRUE	TRUE	FALSE	TRUE	FALSE	Found by CROWN-seq and at least one another method
1	22052720	+	TRUE	TRUE	FALSE	TRUE	FALSE	Found by CROWN-seq and at least one another method
1	22529299	+	FALSE	FALSE	FALSE	TRUE	FALSE	Closest annotation >=100 nt
1	23088934	-	FALSE	FALSE	FALSE	TRUE	FALSE	Closest annotation >=100 nt
1	23168839	-	TRUE	TRUE	FALSE	FALSE	TRUE	Found by CROWN-seq and at least one another method
1	23168853	-	TRUE	TRUE	FALSE	FALSE	TRUE	Found by CROWN-seq and at least one another method
1	23344281	-	TRUE	TRUE	TRUE	FALSE	FALSE	Found by CROWN-seq and at least one another method
1	23531214	-	TRUE	TRUE	FALSE	FALSE	TRUE	Found by CROWN-seq and at least one another method
1	23531233	-	TRUE	TRUE	FALSE	TRUE	FALSE	Found by CROWN-seq and at least one another method
1	23778393	+	TRUE	TRUE	FALSE	TRUE	FALSE	Found by CROWN-seq and at least one another method
1	23778403	+	TRUE	TRUE	FALSE	TRUE	FALSE	Found by CROWN-seq and at least one another method
1	23778418	+	TRUE	TRUE	FALSE	TRUE	FALSE	Found by CROWN-seq and at least one another method
1	23825428	-	TRUE	TRUE	FALSE	TRUE	FALSE	Found by CROWN-seq and at least one another method
1	23825441	-	TRUE	TRUE	TRUE	FALSE	FALSE	Found by CROWN-seq and at least one another method
1	23959823	+	FALSE	TRUE	TRUE	TRUE	FALSE	Low coverage
1	24643298	+	TRUE	TRUE	FALSE	TRUE	FALSE	Found by CROWN-seq and at least one another method
1	24643302	+	TRUE	TRUE	FALSE	TRUE	FALSE	Found by CROWN-seq and at least one another method
1	24643306	+	TRUE	TRUE	TRUE	FALSE	FALSE	Found by CROWN-seq and at least one another method
1	24745382	+	TRUE	TRUE	TRUE	FALSE	FALSE	Found by CROWN-seq and at least one another method
1	24745432	+	TRUE	TRUE	FALSE	TRUE	FALSE	Found by CROWN-seq and at least one another method
1	24745447	+	TRUE	TRUE	FALSE	TRUE	FALSE	Found by CROWN-seq and at least one another method
1	25232484	-	TRUE	TRUE	TRUE	FALSE	FALSE	Found by CROWN-seq and at least one another method
1	25232504	-	TRUE	TRUE	FALSE	FALSE	TRUE	Found by CROWN-seq and at least one another method
1	25247454	-	TRUE	TRUE	TRUE	TRUE	FALSE	Found by CROWN-seq and at least one another method
1	25338308	+	TRUE	TRUE	TRUE	TRUE	FALSE	Found by CROWN-seq and at least one another method
1	25338334	+	TRUE	TRUE	FALSE	TRUE	FALSE	Found by CROWN-seq and at least one another method
1	25819954	+	TRUE	TRUE	FALSE	TRUE	FALSE	Found by CROWN-seq and at least one another method
1	25819978	+	FALSE	TRUE	FALSE	TRUE	FALSE	Low coverage
1	25906419	-	TRUE	TRUE	FALSE	TRUE	FALSE	Found by CROWN-seq and at least one another method
1	26111165	+	FALSE	TRUE	FALSE	FALSE	TRUE	Low coverage
1	26122523	+	FALSE	FALSE	FALSE	TRUE	FALSE	Closest annotation >=100 nt
1	26169927	+	TRUE	TRUE	TRUE	FALSE	FALSE	Found by CROWN-seq and at least one another method
1	26306648	-	TRUE	TRUE	FALSE	TRUE	FALSE	Found by CROWN-seq and at least one another method
1	26432321	+	TRUE	TRUE	FALSE	TRUE	FALSE	Found by CROWN-seq and at least one another method
1	26432324	+	TRUE	TRUE	FALSE	TRUE	FALSE	Found by CROWN-seq and at least one another method
1	26432403	+	FALSE	FALSE	FALSE	FALSE	TRUE	Closest annotation <100 nt
1	26472420	+	TRUE	TRUE	FALSE	FALSE	TRUE	Found by CROWN-seq and at least one another method
1	26472453	+	TRUE	TRUE	TRUE	TRUE	FALSE	Found by CROWN-seq and at least one another method
1	26472454	+	FALSE	TRUE	FALSE	FALSE	TRUE	Low coverage
1	26472471	+	TRUE	TRUE	FALSE	TRUE	FALSE	Found by CROWN-seq and at least one another method
1	26472477	+	TRUE	TRUE	FALSE	TRUE	FALSE	Found by CROWN-seq and at least one another method
1	26472488	+	TRUE	TRUE	FALSE	TRUE	FALSE	Found by CROWN-seq and at least one another method
1	26472516	+	FALSE	TRUE	FALSE	TRUE	FALSE	Low coverage
1	26696032	+	TRUE	TRUE	FALSE	TRUE	FALSE	Found by CROWN-seq and at least one another method
1	26890274	-	TRUE	TRUE	FALSE	TRUE	TRUE	Found by CROWN-seq and at least one another method
1	26890283	-	TRUE	TRUE	FALSE	FALSE	TRUE	Found by CROWN-seq and at least one another method
1	26921760	+	TRUE	TRUE	FALSE	TRUE	FALSE	Found by CROWN-seq and at least one another method
1	26921787	+	TRUE	TRUE	FALSE	TRUE	FALSE	Found by CROWN-seq and at least one another method
1	27322245	+	FALSE	TRUE	FALSE	TRUE	FALSE	Low coverage
1	27322255	+	TRUE	TRUE	FALSE	TRUE	FALSE	Found by CROWN-seq and at least one another method
1	27322266	+	TRUE	TRUE	FALSE	TRUE	FALSE	Found by CROWN-seq and at least one another method
1	27490146	-	TRUE	TRUE	FALSE	TRUE	FALSE	Found by CROWN-seq and at least one another method
1	27549144	-	FALSE	FALSE	FALSE	TRUE	FALSE	Closest annotation >=100 nt
1	27549147	-	FALSE	FALSE	FALSE	TRUE	FALSE	Closest annotation >=100 nt
1	27830804	+	TRUE	TRUE	TRUE	TRUE	FALSE	Found by CROWN-seq and at least one another method
1	27830814	+	TRUE	TRUE	FALSE	TRUE	FALSE	Found by CROWN-seq and at least one another method
1	27914549	-	TRUE	TRUE	FALSE	TRUE	FALSE	Found by CROWN-seq and at least one another method
1	27914575	-	TRUE	TRUE	TRUE	TRUE	FALSE	Found by CROWN-seq and at least one another method
1	27935029	+	TRUE	TRUE	FALSE	FALSE	TRUE	Found by CROWN-seq and at least one another method
1	28233026	-	TRUE	TRUE	FALSE	FALSE	TRUE	Found by CROWN-seq and at least one another method
1	28233027	-	TRUE	TRUE	TRUE	FALSE	FALSE	Found by CROWN-seq and at least one another method
1	28233029	-	TRUE	TRUE	FALSE	FALSE	TRUE	Found by CROWN-seq and at least one another method
1	28236095	+	TRUE	TRUE	FALSE	FALSE	TRUE	Found by CROWN-seq and at least one another method
1	28236121	+	TRUE	TRUE	TRUE	FALSE	FALSE	Found by CROWN-seq and at least one another method
1	28236124	+	TRUE	TRUE	FALSE	TRUE	FALSE	Found by CROWN-seq and at least one another method
1	28259482	+	TRUE	TRUE	FALSE	TRUE	FALSE	Found by CROWN-seq and at least one another method
1	28259504	+	TRUE	TRUE	FALSE	TRUE	FALSE	Found by CROWN-seq and at least one another method
1	28259524	+	TRUE	TRUE	FALSE	TRUE	FALSE	Found by CROWN-seq and at least one another method
1	28518236	+	TRUE	TRUE	FALSE	TRUE	FALSE	Found by CROWN-seq and at least one another method
1	28518243	+	TRUE	TRUE	FALSE	TRUE	FALSE	Found by CROWN-seq and at least one another method
1	28518255	+	TRUE	TRUE	TRUE	TRUE	FALSE	Found by CROWN-seq and at least one another method
1	28553087	+	TRUE	TRUE	FALSE	TRUE	FALSE	Found by CROWN-seq and at least one another method
1	28553095	+	TRUE	TRUE	FALSE	TRUE	FALSE	Found by CROWN-seq and at least one another method
1	28643085	-	TRUE	TRUE	FALSE	TRUE	FALSE	Found by CROWN-seq and at least one another method
1	28668784	+	TRUE	TRUE	FALSE	TRUE	FALSE	Found by CROWN-seq and at least one another method
1	28736940	+	TRUE	TRUE	FALSE	TRUE	FALSE	Found by CROWN-seq and at least one another method
1	28887103	+	TRUE	TRUE	FALSE	TRUE	FALSE	Found by CROWN-seq and at least one another method
1	29230931	-	TRUE	TRUE	FALSE	TRUE	FALSE	Found by CROWN-seq and at least one another method
1	29236522	+	TRUE	TRUE	FALSE	TRUE	FALSE	Found by CROWN-seq and at least one another method
1	31065686	-	FALSE	FALSE	FALSE	TRUE	FALSE	Closest annotation <100 nt
1	31065706	-	FALSE	TRUE	FALSE	TRUE	FALSE	Low coverage
1	31065717	-	TRUE	TRUE	FALSE	TRUE	TRUE	Found by CROWN-seq and at least one another method
1	31296764	-	TRUE	TRUE	TRUE	FALSE	FALSE	Found by CROWN-seq and at least one another method
1	31296782	-	TRUE	TRUE	FALSE	TRUE	FALSE	Found by CROWN-seq and at least one another method
1	31296791	-	TRUE	TRUE	FALSE	TRUE	FALSE	Found by CROWN-seq and at least one another method
1	31296815	-	TRUE	TRUE	FALSE	TRUE	FALSE	Found by CROWN-seq and at least one another method
1	31297041	+	TRUE	TRUE	FALSE	TRUE	FALSE	Found by CROWN-seq and at least one another method
1	31432020	+	FALSE	FALSE	TRUE	FALSE	FALSE	Closest annotation >=100 nt
1	32013854	+	TRUE	TRUE	TRUE	FALSE	FALSE	Found by CROWN-seq and at least one another method
1	32072928	+	TRUE	TRUE	FALSE	TRUE	FALSE	Found by CROWN-seq and at least one another method
1	32072940	+	TRUE	TRUE	TRUE	FALSE	FALSE	Found by CROWN-seq and at least one another method
1	32108045	+	TRUE	TRUE	FALSE	FALSE	TRUE	Found by CROWN-seq and at least one another method
1	32108056	+	TRUE	TRUE	TRUE	FALSE	FALSE	Found by CROWN-seq and at least one another method
1	32108108	+	TRUE	TRUE	FALSE	TRUE	FALSE	Found by CROWN-seq and at least one another method
1	32179675	+	TRUE	TRUE	TRUE	TRUE	FALSE	Found by CROWN-seq and at least one another method
1	32179712	+	TRUE	TRUE	FALSE	TRUE	FALSE	Found by CROWN-seq and at least one another method
1	32179715	+	TRUE	TRUE	FALSE	TRUE	FALSE	Found by CROWN-seq and at least one another method
1	32179719	+	TRUE	TRUE	FALSE	TRUE	FALSE	Found by CROWN-seq and at least one another method
1	32179743	+	TRUE	TRUE	FALSE	TRUE	TRUE	Found by CROWN-seq and at least one another method
1	32200647	+	FALSE	TRUE	TRUE	TRUE	FALSE	Low coverage
1	32205671	+	TRUE	TRUE	FALSE	TRUE	FALSE	Found by CROWN-seq and at least one another method
1	32222407	+	TRUE	TRUE	TRUE	FALSE	FALSE	Found by CROWN-seq and at least one another method
1	32292126	+	TRUE	TRUE	FALSE	TRUE	FALSE	Found by CROWN-seq and at least one another method
1	32292133	+	TRUE	TRUE	TRUE	FALSE	FALSE	Found by CROWN-seq and at least one another method
1	32336230	-	TRUE	TRUE	TRUE	TRUE	FALSE	Found by CROWN-seq and at least one another method
1	32394421	-	FALSE	TRUE	FALSE	TRUE	FALSE	Low coverage
1	32394425	-	TRUE	TRUE	FALSE	TRUE	FALSE	Found by CROWN-seq and at least one another method
1	32394430	-	TRUE	TRUE	FALSE	TRUE	FALSE	Found by CROWN-seq and at least one another method
1	32394437	-	TRUE	TRUE	FALSE	FALSE	TRUE	Found by CROWN-seq and at least one another method
1	32394441	-	TRUE	TRUE	FALSE	FALSE	TRUE	Found by CROWN-seq and at least one another method
1	32394444	-	TRUE	TRUE	FALSE	FALSE	TRUE	Found by CROWN-seq and at least one another method
1	32650533	-	FALSE	TRUE	FALSE	FALSE	TRUE	Low coverage
1	32650550	-	TRUE	TRUE	FALSE	FALSE	TRUE	Found by CROWN-seq and at least one another method
1	32650561	-	TRUE	TRUE	FALSE	FALSE	TRUE	Found by CROWN-seq and at least one another method
1	32651210	+	TRUE	TRUE	TRUE	FALSE	FALSE	Found by CROWN-seq and at least one another method
1	32651232	+	TRUE	TRUE	FALSE	TRUE	FALSE	Found by CROWN-seq and at least one another method
1	32817385	-	TRUE	TRUE	FALSE	FALSE	TRUE	Found by CROWN-seq and at least one another method
1	32817414	-	TRUE	TRUE	TRUE	FALSE	FALSE	Found by CROWN-seq and at least one another method
1	33036879	-	TRUE	TRUE	TRUE	TRUE	FALSE	Found by CROWN-seq and at least one another method
1	33036932	-	TRUE	TRUE	FALSE	TRUE	FALSE	Found by CROWN-seq and at least one another method
1	33349897	-	TRUE	TRUE	FALSE	TRUE	FALSE	Found by CROWN-seq and at least one another method
1	35268967	+	TRUE	TRUE	FALSE	FALSE	TRUE	Found by CROWN-seq and at least one another method
1	35557820	+	TRUE	TRUE	FALSE	TRUE	FALSE	Found by CROWN-seq and at least one another method
1	35641525	-	TRUE	TRUE	TRUE	FALSE	FALSE	Found by CROWN-seq and at least one another method
1	35641538	-	TRUE	TRUE	FALSE	TRUE	FALSE	Found by CROWN-seq and at least one another method
1	35769967	-	TRUE	TRUE	TRUE	TRUE	FALSE	Found by CROWN-seq and at least one another method
1	36087419	+	FALSE	TRUE	FALSE	TRUE	FALSE	Low coverage
1	36149486	-	TRUE	TRUE	FALSE	TRUE	FALSE	Found by CROWN-seq and at least one another method
1	36149490	-	TRUE	TRUE	FALSE	TRUE	FALSE	Found by CROWN-seq and at least one another method
1	36385912	-	TRUE	TRUE	FALSE	TRUE	FALSE	Found by CROWN-seq and at least one another method
1	36397906	-	TRUE	TRUE	TRUE	TRUE	FALSE	Found by CROWN-seq and at least one another method
1	36397919	-	TRUE	TRUE	FALSE	TRUE	FALSE	Found by CROWN-seq and at least one another method
1	36464360	-	TRUE	TRUE	FALSE	TRUE	FALSE	Found by CROWN-seq and at least one another method
1	36464378	-	TRUE	TRUE	TRUE	TRUE	FALSE	Found by CROWN-seq and at least one another method
1	37514754	-	TRUE	TRUE	FALSE	TRUE	FALSE	Found by CROWN-seq and at least one another method
1	37595935	-	TRUE	TRUE	TRUE	TRUE	FALSE	Found by CROWN-seq and at least one another method
1	37690529	-	TRUE	TRUE	FALSE	FALSE	TRUE	Found by CROWN-seq and at least one another method
1	37807790	+	TRUE	TRUE	FALSE	TRUE	FALSE	Found by CROWN-seq and at least one another method
1	37807796	+	TRUE	TRUE	FALSE	TRUE	FALSE	Found by CROWN-seq and at least one another method
1	37808208	-	TRUE	TRUE	FALSE	TRUE	FALSE	Found by CROWN-seq and at least one another method
1	37947051	-	TRUE	TRUE	FALSE	TRUE	FALSE	Found by CROWN-seq and at least one another method
1	37990022	-	TRUE	TRUE	FALSE	TRUE	FALSE	Found by CROWN-seq and at least one another method
1	38012734	+	TRUE	TRUE	TRUE	TRUE	FALSE	Found by CROWN-seq and at least one another method
1	38991288	+	TRUE	TRUE	TRUE	TRUE	FALSE	Found by CROWN-seq and at least one another method
1	39026318	+	TRUE	TRUE	TRUE	FALSE	FALSE	Found by CROWN-seq and at least one another method
1	39026350	+	TRUE	TRUE	FALSE	FALSE	TRUE	Found by CROWN-seq and at least one another method
1	39883504	-	TRUE	TRUE	FALSE	TRUE	FALSE	Found by CROWN-seq and at least one another method
1	40040754	+	TRUE	TRUE	FALSE	TRUE	FALSE	Found by CROWN-seq and at least one another method
1	40040775	+	TRUE	TRUE	FALSE	TRUE	FALSE	Found by CROWN-seq and at least one another method
1	40097254	-	TRUE	TRUE	TRUE	FALSE	FALSE	Found by CROWN-seq and at least one another method
1	40373720	+	TRUE	TRUE	FALSE	TRUE	FALSE	Found by CROWN-seq and at least one another method
1	40692066	-	FALSE	TRUE	TRUE	FALSE	TRUE	Low coverage
1	40692101	-	FALSE	TRUE	FALSE	FALSE	TRUE	Low coverage
1	40979665	+	TRUE	TRUE	FALSE	TRUE	FALSE	Found by CROWN-seq and at least one another method
1	40979705	+	TRUE	TRUE	FALSE	TRUE	FALSE	Found by CROWN-seq and at least one another method
1	40979755	+	TRUE	TRUE	TRUE	TRUE	FALSE	Found by CROWN-seq and at least one another method
1	42658424	+	TRUE	TRUE	TRUE	FALSE	FALSE	Found by CROWN-seq and at least one another method
1	42682364	+	TRUE	TRUE	FALSE	FALSE	TRUE	Found by CROWN-seq and at least one another method
1	42682401	+	TRUE	TRUE	FALSE	FALSE	TRUE	Found by CROWN-seq and at least one another method
1	42682427	+	TRUE	TRUE	TRUE	FALSE	TRUE	Found by CROWN-seq and at least one another method
1	42958861	-	TRUE	TRUE	FALSE	TRUE	FALSE	Found by CROWN-seq and at least one another method
1	42958868	-	TRUE	TRUE	FALSE	FALSE	TRUE	Found by CROWN-seq and at least one another method
1	43172283	-	TRUE	TRUE	TRUE	TRUE	FALSE	Found by CROWN-seq and at least one another method
1	43172286	-	TRUE	TRUE	FALSE	TRUE	FALSE	Found by CROWN-seq and at least one another method
1	43368011	-	TRUE	TRUE	FALSE	TRUE	FALSE	Found by CROWN-seq and at least one another method
1	43368024	-	TRUE	TRUE	TRUE	FALSE	FALSE	Found by CROWN-seq and at least one another method
1	43650149	+	TRUE	TRUE	FALSE	TRUE	FALSE	Found by CROWN-seq and at least one another method
1	43969987	+	TRUE	TRUE	FALSE	FALSE	TRUE	Found by CROWN-seq and at least one another method
1	43970010	+	TRUE	TRUE	FALSE	TRUE	FALSE	Found by CROWN-seq and at least one another method
1	43970013	+	TRUE	TRUE	FALSE	TRUE	FALSE	Found by CROWN-seq and at least one another method
1	43974919	+	TRUE	TRUE	TRUE	TRUE	FALSE	Found by CROWN-seq and at least one another method
1	43974922	+	TRUE	TRUE	FALSE	TRUE	FALSE	Found by CROWN-seq and at least one another method
1	43974960	+	TRUE	TRUE	FALSE	TRUE	FALSE	Found by CROWN-seq and at least one another method
1	44213464	+	TRUE	TRUE	FALSE	TRUE	FALSE	Found by CROWN-seq and at least one another method
1	44631955	+	TRUE	TRUE	TRUE	TRUE	FALSE	Found by CROWN-seq and at least one another method
1	44631968	+	TRUE	TRUE	FALSE	TRUE	FALSE	Found by CROWN-seq and at least one another method
1	44739833	+	TRUE	TRUE	TRUE	FALSE	FALSE	Found by CROWN-seq and at least one another method
1	44775524	+	TRUE	TRUE	TRUE	FALSE	FALSE	Found by CROWN-seq and at least one another method
1	44780773	-	FALSE	TRUE	TRUE	FALSE	FALSE	Low coverage
1	44986593	-	FALSE	TRUE	TRUE	FALSE	FALSE	Low coverage
1	44986595	-	TRUE	TRUE	FALSE	TRUE	FALSE	Found by CROWN-seq and at least one another method
1	44986599	-	TRUE	TRUE	FALSE	TRUE	FALSE	Found by CROWN-seq and at least one another method
1	45012211	+	TRUE	TRUE	FALSE	TRUE	FALSE	Found by CROWN-seq and at least one another method
1	45500316	+	TRUE	TRUE	FALSE	TRUE	FALSE	Found by CROWN-seq and at least one another method
1	45550826	+	TRUE	TRUE	FALSE	TRUE	FALSE	Found by CROWN-seq and at least one another method
1	45550841	+	TRUE	TRUE	FALSE	TRUE	FALSE	Found by CROWN-seq and at least one another method
1	45584046	+	TRUE	TRUE	TRUE	FALSE	FALSE	Found by CROWN-seq and at least one another method
1	45686527	-	TRUE	TRUE	FALSE	TRUE	TRUE	Found by CROWN-seq and at least one another method
1	46286173	+	FALSE	FALSE	FALSE	TRUE	FALSE	Closest annotation >=100 nt
1	46303325	-	TRUE	TRUE	FALSE	TRUE	FALSE	Found by CROWN-seq and at least one another method
1	46303691	+	TRUE	TRUE	TRUE	TRUE	FALSE	Found by CROWN-seq and at least one another method
1	46340804	+	TRUE	TRUE	FALSE	TRUE	FALSE	Found by CROWN-seq and at least one another method
1	47437321	-	FALSE	FALSE	FALSE	TRUE	FALSE	Closest annotation >=100 nt
1	50780289	+	FALSE	TRUE	TRUE	FALSE	FALSE	Low coverage
1	50960244	-	FALSE	TRUE	FALSE	TRUE	FALSE	Low coverage
1	50968777	+	FALSE	TRUE	FALSE	TRUE	FALSE	Low coverage
1	50968807	+	FALSE	TRUE	FALSE	TRUE	FALSE	Low coverage
1	50970254	+	TRUE	TRUE	TRUE	TRUE	FALSE	Found by CROWN-seq and at least one another method
1	51729861	+	TRUE	TRUE	FALSE	TRUE	FALSE	Found by CROWN-seq and at least one another method
1	52056332	+	TRUE	TRUE	TRUE	FALSE	FALSE	Found by CROWN-seq and at least one another method
1	52404564	+	TRUE	TRUE	TRUE	FALSE	FALSE	Found by CROWN-seq and at least one another method
1	52553092	-	TRUE	TRUE	FALSE	TRUE	FALSE	Found by CROWN-seq and at least one another method
1	52553099	-	TRUE	TRUE	TRUE	FALSE	FALSE	Found by CROWN-seq and at least one another method
1	53196800	+	TRUE	TRUE	FALSE	TRUE	FALSE	Found by CROWN-seq and at least one another method
1	53220611	-	TRUE	TRUE	FALSE	TRUE	FALSE	Found by CROWN-seq and at least one another method
1	53220634	-	TRUE	TRUE	FALSE	FALSE	TRUE	Found by CROWN-seq and at least one another method
1	53238518	-	TRUE	TRUE	FALSE	TRUE	FALSE	Found by CROWN-seq and at least one another method
1	53238525	-	TRUE	TRUE	TRUE	FALSE	FALSE	Found by CROWN-seq and at least one another method
1	53238543	-	TRUE	TRUE	FALSE	TRUE	FALSE	Found by CROWN-seq and at least one another method
1	54053441	-	TRUE	TRUE	TRUE	TRUE	FALSE	Found by CROWN-seq and at least one another method
1	54053608	+	TRUE	TRUE	FALSE	TRUE	FALSE	Found by CROWN-seq and at least one another method
1	54200020	-	TRUE	TRUE	FALSE	TRUE	FALSE	Found by CROWN-seq and at least one another method
1	54200030	-	TRUE	TRUE	FALSE	TRUE	FALSE	Found by CROWN-seq and at least one another method
1	54200170	+	TRUE	TRUE	TRUE	FALSE	FALSE	Found by CROWN-seq and at least one another method
1	54200183	+	TRUE	TRUE	FALSE	TRUE	FALSE	Found by CROWN-seq and at least one another method
1	54715870	+	TRUE	TRUE	FALSE	TRUE	FALSE	Found by CROWN-seq and at least one another method
1	54764499	-	TRUE	TRUE	FALSE	TRUE	FALSE	Found by CROWN-seq and at least one another method
1	54887185	-	TRUE	TRUE	FALSE	TRUE	FALSE	Found by CROWN-seq and at least one another method
1	54887195	-	TRUE	TRUE	TRUE	FALSE	FALSE	Found by CROWN-seq and at least one another method
1	56579407	-	FALSE	TRUE	FALSE	FALSE	TRUE	Low coverage
1	58631550	-	FALSE	TRUE	TRUE	TRUE	FALSE	Low coverage
1	58700062	-	TRUE	TRUE	FALSE	TRUE	TRUE	Found by CROWN-seq and at least one another method
1	58784043	-	TRUE	TRUE	FALSE	TRUE	FALSE	Found by CROWN-seq and at least one another method
1	61082423	+	FALSE	TRUE	FALSE	FALSE	TRUE	Low coverage
1	61082574	+	TRUE	TRUE	FALSE	FALSE	TRUE	Found by CROWN-seq and at least one another method
1	61082724	+	FALSE	FALSE	FALSE	FALSE	TRUE	Closest annotation <100 nt
1	62437050	+	TRUE	TRUE	FALSE	TRUE	FALSE	Found by CROWN-seq and at least one another method
1	63593411	+	TRUE	TRUE	TRUE	FALSE	TRUE	Found by CROWN-seq and at least one another method
1	65067732	-	TRUE	TRUE	FALSE	FALSE	TRUE	Found by CROWN-seq and at least one another method
1	65067746	-	TRUE	TRUE	FALSE	FALSE	TRUE	Found by CROWN-seq and at least one another method
1	65420713	+	TRUE	TRUE	FALSE	TRUE	FALSE	Found by CROWN-seq and at least one another method
1	66930270	+	TRUE	TRUE	FALSE	TRUE	FALSE	Found by CROWN-seq and at least one another method
1	67430386	-	TRUE	TRUE	TRUE	FALSE	FALSE	Found by CROWN-seq and at least one another method
1	67685201	+	TRUE	TRUE	FALSE	TRUE	FALSE	Found by CROWN-seq and at least one another method
1	68232523	-	TRUE	TRUE	TRUE	FALSE	TRUE	Found by CROWN-seq and at least one another method
1	68232549	-	TRUE	TRUE	FALSE	TRUE	FALSE	Found by CROWN-seq and at least one another method
1	70205565	-	TRUE	TRUE	FALSE	TRUE	FALSE	Found by CROWN-seq and at least one another method
1	70205579	-	TRUE	TRUE	FALSE	FALSE	TRUE	Found by CROWN-seq and at least one another method
1	70205676	-	FALSE	TRUE	FALSE	FALSE	TRUE	Low coverage
1	70205691	+	TRUE	TRUE	TRUE	FALSE	FALSE	Found by CROWN-seq and at least one another method
1	70205719	+	TRUE	TRUE	FALSE	TRUE	FALSE	Found by CROWN-seq and at least one another method
1	70205724	+	TRUE	TRUE	FALSE	TRUE	FALSE	Found by CROWN-seq and at least one another method
1	70221479	+	TRUE	TRUE	TRUE	FALSE	FALSE	Found by CROWN-seq and at least one another method
1	70221481	+	TRUE	TRUE	FALSE	TRUE	FALSE	Found by CROWN-seq and at least one another method
1	70354747	-	TRUE	TRUE	FALSE	FALSE	TRUE	Found by CROWN-seq and at least one another method
1	70354811	+	FALSE	TRUE	FALSE	FALSE	TRUE	Low coverage
1	70354814	+	FALSE	TRUE	TRUE	FALSE	FALSE	Low coverage
1	70354817	+	FALSE	TRUE	FALSE	TRUE	TRUE	Low coverage
1	71081029	-	TRUE	TRUE	TRUE	FALSE	FALSE	Found by CROWN-seq and at least one another method
1	74733174	+	TRUE	TRUE	FALSE	TRUE	FALSE	Found by CROWN-seq and at least one another method
1	75724755	+	TRUE	TRUE	TRUE	FALSE	FALSE	Found by CROWN-seq and at least one another method
1	76699753	+	FALSE	TRUE	TRUE	FALSE	FALSE	Low coverage
1	77219430	-	TRUE	TRUE	TRUE	FALSE	FALSE	Found by CROWN-seq and at least one another method
1	77683398	-	TRUE	TRUE	TRUE	FALSE	FALSE	Found by CROWN-seq and at least one another method
1	77888628	+	TRUE	TRUE	FALSE	FALSE	TRUE	Found by CROWN-seq and at least one another method
1	77979077	-	TRUE	TRUE	TRUE	FALSE	FALSE	Found by CROWN-seq and at least one another method
1	84077903	-	FALSE	TRUE	FALSE	TRUE	FALSE	Low coverage
1	84479259	+	TRUE	TRUE	FALSE	FALSE	TRUE	Found by CROWN-seq and at least one another method
1	84479269	+	TRUE	TRUE	FALSE	FALSE	TRUE	Found by CROWN-seq and at least one another method
1	84506204	-	TRUE	TRUE	TRUE	FALSE	FALSE	Found by CROWN-seq and at least one another method
1	85465159	-	TRUE	TRUE	TRUE	FALSE	FALSE	Found by CROWN-seq and at least one another method
1	85580761	+	TRUE	TRUE	FALSE	TRUE	TRUE	Found by CROWN-seq and at least one another method
1	85708174	-	FALSE	FALSE	FALSE	FALSE	TRUE	Closest annotation >=100 nt
1	85708415	-	TRUE	TRUE	TRUE	FALSE	FALSE	Found by CROWN-seq and at least one another method
1	86914124	-	TRUE	TRUE	TRUE	FALSE	FALSE	Found by CROWN-seq and at least one another method
1	86914674	+	FALSE	FALSE	FALSE	FALSE	TRUE	Closest annotation <100 nt
1	87328482	+	FALSE	TRUE	TRUE	FALSE	TRUE	Low coverage
1	87328484	+	FALSE	TRUE	FALSE	FALSE	TRUE	Low coverage
1	87328866	+	TRUE	TRUE	FALSE	FALSE	TRUE	Found by CROWN-seq and at least one another method
1	88684241	+	TRUE	TRUE	FALSE	FALSE	TRUE	Found by CROWN-seq and at least one another method
1	88891564	-	TRUE	TRUE	TRUE	FALSE	FALSE	Found by CROWN-seq and at least one another method
1	88992629	-	TRUE	TRUE	TRUE	TRUE	FALSE	Found by CROWN-seq and at least one another method
1	91500858	+	TRUE	TRUE	FALSE	TRUE	FALSE	Found by CROWN-seq and at least one another method
1	92298974	-	TRUE	TRUE	FALSE	TRUE	FALSE	Found by CROWN-seq and at least one another method
1	92298985	-	FALSE	TRUE	TRUE	FALSE	FALSE	Low coverage
1	92298987	-	TRUE	TRUE	FALSE	TRUE	TRUE	Found by CROWN-seq and at least one another method
1	92299009	-	FALSE	TRUE	FALSE	FALSE	TRUE	Low coverage
1	92299059	+	TRUE	TRUE	FALSE	TRUE	FALSE	Found by CROWN-seq and at least one another method
1	93079283	+	TRUE	TRUE	TRUE	TRUE	TRUE	Found by CROWN-seq and at least one another method
1	93345909	+	TRUE	TRUE	FALSE	TRUE	FALSE	Found by CROWN-seq and at least one another method
1	93909456	-	TRUE	TRUE	TRUE	FALSE	FALSE	Found by CROWN-seq and at least one another method
1	93909535	-	TRUE	TRUE	TRUE	FALSE	FALSE	Found by CROWN-seq and at least one another method
1	94927132	-	TRUE	TRUE	FALSE	TRUE	FALSE	Found by CROWN-seq and at least one another method
1	96721791	+	TRUE	TRUE	TRUE	FALSE	FALSE	Found by CROWN-seq and at least one another method
1	100038101	+	TRUE	TRUE	FALSE	TRUE	FALSE	Found by CROWN-seq and at least one another method
1	100133054	-	FALSE	TRUE	FALSE	FALSE	TRUE	Low coverage
1	100133163	+	TRUE	TRUE	FALSE	FALSE	TRUE	Found by CROWN-seq and at least one another method
1	100133165	+	TRUE	TRUE	TRUE	FALSE	FALSE	Found by CROWN-seq and at least one another method
1	100133166	+	TRUE	TRUE	FALSE	FALSE	TRUE	Found by CROWN-seq and at least one another method
1	108692310	+	TRUE	TRUE	TRUE	FALSE	FALSE	Found by CROWN-seq and at least one another method
1	108692327	+	TRUE	TRUE	FALSE	TRUE	FALSE	Found by CROWN-seq and at least one another method
1	108746647	+	TRUE	TRUE	FALSE	FALSE	TRUE	Found by CROWN-seq and at least one another method
1	109075994	-	TRUE	TRUE	FALSE	FALSE	TRUE	Found by CROWN-seq and at least one another method
1	109076003	-	TRUE	TRUE	FALSE	TRUE	FALSE	Found by CROWN-seq and at least one another method
1	109090773	+	TRUE	TRUE	FALSE	FALSE	TRUE	Found by CROWN-seq and at least one another method
1	109213893	+	TRUE	TRUE	FALSE	TRUE	FALSE	Found by CROWN-seq and at least one another method
1	109213907	+	TRUE	TRUE	FALSE	TRUE	FALSE	Found by CROWN-seq and at least one another method
1	109213920	+	TRUE	TRUE	FALSE	TRUE	FALSE	Found by CROWN-seq and at least one another method
1	109213932	+	TRUE	TRUE	FALSE	TRUE	FALSE	Found by CROWN-seq and at least one another method
1	109283144	-	TRUE	TRUE	TRUE	TRUE	FALSE	Found by CROWN-seq and at least one another method
1	109397903	-	TRUE	TRUE	TRUE	FALSE	FALSE	Found by CROWN-seq and at least one another method
1	109426437	-	TRUE	TRUE	TRUE	TRUE	FALSE	Found by CROWN-seq and at least one another method
1	109426448	-	TRUE	TRUE	FALSE	TRUE	FALSE	Found by CROWN-seq and at least one another method
1	109548635	+	TRUE	TRUE	TRUE	FALSE	FALSE	Found by CROWN-seq and at least one another method
1	109619846	+	TRUE	TRUE	FALSE	TRUE	FALSE	Found by CROWN-seq and at least one another method
1	109740316	-	TRUE	TRUE	TRUE	FALSE	FALSE	Found by CROWN-seq and at least one another method
1	109984786	+	TRUE	TRUE	TRUE	TRUE	FALSE	Found by CROWN-seq and at least one another method
1	109984809	+	TRUE	TRUE	FALSE	TRUE	FALSE	Found by CROWN-seq and at least one another method
1	110339425	+	TRUE	TRUE	FALSE	TRUE	FALSE	Found by CROWN-seq and at least one another method
1	110347554	+	FALSE	FALSE	FALSE	TRUE	FALSE	Closest annotation >=100 nt
1	110407694	-	TRUE	TRUE	FALSE	TRUE	FALSE	Found by CROWN-seq and at least one another method
1	111139734	+	FALSE	TRUE	FALSE	FALSE	TRUE	Low coverage
1	111140220	+	TRUE	TRUE	FALSE	FALSE	TRUE	Found by CROWN-seq and at least one another method
1	111140251	+	TRUE	TRUE	FALSE	TRUE	FALSE	Found by CROWN-seq and at least one another method
1	111449256	-	TRUE	TRUE	TRUE	TRUE	FALSE	Found by CROWN-seq and at least one another method
1	111449272	-	TRUE	TRUE	FALSE	TRUE	FALSE	Found by CROWN-seq and at least one another method
1	111449465	+	TRUE	TRUE	TRUE	FALSE	FALSE	Found by CROWN-seq and at least one another method
1	111619841	+	FALSE	TRUE	FALSE	FALSE	TRUE	Low coverage
1	111755685	+	TRUE	TRUE	FALSE	FALSE	TRUE	Found by CROWN-seq and at least one another method
1	111755702	+	TRUE	TRUE	FALSE	FALSE	TRUE	Found by CROWN-seq and at least one another method
1	112619818	+	TRUE	TRUE	FALSE	TRUE	FALSE	Found by CROWN-seq and at least one another method
1	112619832	+	TRUE	TRUE	FALSE	FALSE	TRUE	Found by CROWN-seq and at least one another method
1	112619834	+	TRUE	TRUE	TRUE	FALSE	FALSE	Found by CROWN-seq and at least one another method
1	112619873	+	FALSE	TRUE	FALSE	FALSE	TRUE	Low coverage
1	112647216	+	TRUE	TRUE	FALSE	FALSE	TRUE	Found by CROWN-seq and at least one another method
1	112674694	+	FALSE	TRUE	FALSE	TRUE	FALSE	Low coverage
1	112707127	-	TRUE	TRUE	FALSE	TRUE	FALSE	Found by CROWN-seq and at least one another method
1	112956195	-	TRUE	TRUE	TRUE	FALSE	FALSE	Found by CROWN-seq and at least one another method
1	112956199	-	TRUE	TRUE	FALSE	FALSE	TRUE	Found by CROWN-seq and at least one another method
1	112956217	-	TRUE	TRUE	FALSE	TRUE	FALSE	Found by CROWN-seq and at least one another method
1	112956738	+	FALSE	TRUE	FALSE	TRUE	FALSE	Low coverage
1	113449660	+	FALSE	TRUE	TRUE	TRUE	FALSE	Low coverage
1	113812293	-	TRUE	TRUE	TRUE	FALSE	FALSE	Found by CROWN-seq and at least one another method
1	114581613	-	TRUE	TRUE	FALSE	TRUE	FALSE	Found by CROWN-seq and at least one another method
1	114581644	-	TRUE	TRUE	TRUE	FALSE	FALSE	Found by CROWN-seq and at least one another method
1	114757921	-	FALSE	FALSE	TRUE	FALSE	FALSE	Closest annotation <100 nt
1	114757977	-	TRUE	TRUE	FALSE	TRUE	FALSE	Found by CROWN-seq and at least one another method
1	114757987	-	TRUE	TRUE	TRUE	FALSE	FALSE	Found by CROWN-seq and at least one another method
1	114757997	-	TRUE	TRUE	FALSE	TRUE	FALSE	Found by CROWN-seq and at least one another method
1	114757998	-	TRUE	TRUE	TRUE	FALSE	FALSE	Found by CROWN-seq and at least one another method
1	114780631	-	TRUE	TRUE	FALSE	TRUE	FALSE	Found by CROWN-seq and at least one another method
1	114780664	-	TRUE	TRUE	TRUE	FALSE	FALSE	Found by CROWN-seq and at least one another method
1	114780666	-	TRUE	TRUE	FALSE	TRUE	FALSE	Found by CROWN-seq and at least one another method
1	114780685	-	TRUE	TRUE	FALSE	TRUE	FALSE	Found by CROWN-seq and at least one another method
1	116373212	+	TRUE	TRUE	TRUE	FALSE	FALSE	Found by CROWN-seq and at least one another method
1	117929754	+	TRUE	TRUE	FALSE	TRUE	FALSE	Found by CROWN-seq and at least one another method
1	119140391	+	FALSE	TRUE	FALSE	TRUE	FALSE	Low coverage
1	119140413	+	FALSE	TRUE	FALSE	FALSE	TRUE	Low coverage
1	119140417	+	FALSE	TRUE	TRUE	TRUE	TRUE	Low coverage
1	119711866	+	FALSE	FALSE	TRUE	FALSE	FALSE	Closest annotation <100 nt
1	120176462	-	TRUE	TRUE	TRUE	FALSE	FALSE	Found by CROWN-seq and at least one another method
1	120176515	-	TRUE	TRUE	FALSE	TRUE	FALSE	Found by CROWN-seq and at least one another method
1	120176520	-	TRUE	TRUE	FALSE	TRUE	FALSE	Found by CROWN-seq and at least one another method
1	121184335	-	FALSE	FALSE	FALSE	TRUE	FALSE	Closest annotation <100 nt
1	143424684	-	FALSE	FALSE	TRUE	FALSE	FALSE	Closest annotation >=100 nt
1	143905980	-	FALSE	FALSE	FALSE	FALSE	TRUE	Closest annotation <100 nt
1	143971986	-	FALSE	FALSE	FALSE	TRUE	FALSE	Closest annotation <100 nt
1	144250276	-	FALSE	FALSE	FALSE	TRUE	FALSE	Closest annotation <100 nt
1	144412576	+	FALSE	TRUE	FALSE	TRUE	FALSE	Low coverage
1	144412578	+	FALSE	TRUE	TRUE	FALSE	FALSE	Low coverage
1	145216389	-	FALSE	FALSE	FALSE	FALSE	TRUE	Closest annotation >=100 nt
1	145281116	+	FALSE	TRUE	FALSE	TRUE	FALSE	Low coverage
1	145608019	+	TRUE	TRUE	FALSE	TRUE	FALSE	Found by CROWN-seq and at least one another method
1	145608048	+	TRUE	TRUE	FALSE	TRUE	FALSE	Found by CROWN-seq and at least one another method
1	145912425	-	FALSE	FALSE	FALSE	TRUE	FALSE	Closest annotation <100 nt
1	145918717	-	TRUE	TRUE	FALSE	TRUE	FALSE	Found by CROWN-seq and at least one another method
1	145927453	-	TRUE	TRUE	TRUE	TRUE	TRUE	Found by CROWN-seq and at least one another method
1	145927467	-	TRUE	TRUE	FALSE	TRUE	FALSE	Found by CROWN-seq and at least one another method
1	145927471	-	TRUE	TRUE	FALSE	TRUE	FALSE	Found by CROWN-seq and at least one another method
1	145958002	-	TRUE	TRUE	FALSE	TRUE	FALSE	Found by CROWN-seq and at least one another method
1	145964716	+	TRUE	TRUE	TRUE	FALSE	FALSE	Found by CROWN-seq and at least one another method
1	146052244	-	FALSE	TRUE	FALSE	TRUE	FALSE	Low coverage
1	147670474	-	TRUE	TRUE	FALSE	TRUE	FALSE	Found by CROWN-seq and at least one another method
1	147928422	+	TRUE	TRUE	FALSE	TRUE	FALSE	Found by CROWN-seq and at least one another method
1	148522601	+	FALSE	TRUE	FALSE	TRUE	FALSE	Low coverage
1	149607191	+	FALSE	FALSE	FALSE	FALSE	TRUE	Closest annotation >=100 nt
1	149812370	-	TRUE	TRUE	FALSE	TRUE	FALSE	Found by CROWN-seq and at least one another method
1	149832657	+	TRUE	TRUE	FALSE	FALSE	TRUE	Found by CROWN-seq and at least one another method
1	149861157	-	TRUE	TRUE	TRUE	FALSE	FALSE	Found by CROWN-seq and at least one another method
1	149886665	-	FALSE	TRUE	FALSE	FALSE	TRUE	Low coverage
1	149886682	-	TRUE	TRUE	FALSE	FALSE	TRUE	Found by CROWN-seq and at least one another method
1	149899568	+	TRUE	TRUE	TRUE	FALSE	FALSE	Found by CROWN-seq and at least one another method
1	149899575	+	TRUE	TRUE	FALSE	TRUE	FALSE	Found by CROWN-seq and at least one another method
1	149899597	+	TRUE	TRUE	FALSE	TRUE	FALSE	Found by CROWN-seq and at least one another method
1	149917842	-	TRUE	TRUE	FALSE	FALSE	TRUE	Found by CROWN-seq and at least one another method
1	149927803	-	TRUE	TRUE	FALSE	TRUE	FALSE	Found by CROWN-seq and at least one another method
1	150067312	+	TRUE	TRUE	FALSE	FALSE	TRUE	Found by CROWN-seq and at least one another method
1	150067802	+	TRUE	TRUE	TRUE	FALSE	FALSE	Found by CROWN-seq and at least one another method
1	150236112	-	TRUE	TRUE	TRUE	FALSE	FALSE	Found by CROWN-seq and at least one another method
1	150268979	-	TRUE	TRUE	TRUE	FALSE	FALSE	Found by CROWN-seq and at least one another method
1	150269057	-	TRUE	TRUE	FALSE	TRUE	FALSE	Found by CROWN-seq and at least one another method
1	150269060	-	TRUE	TRUE	TRUE	FALSE	FALSE	Found by CROWN-seq and at least one another method
1	150293842	+	TRUE	TRUE	FALSE	TRUE	FALSE	Found by CROWN-seq and at least one another method
1	150293858	+	TRUE	TRUE	FALSE	TRUE	TRUE	Found by CROWN-seq and at least one another method
1	150293862	+	TRUE	TRUE	TRUE	FALSE	FALSE	Found by CROWN-seq and at least one another method
1	150293881	+	TRUE	TRUE	FALSE	TRUE	FALSE	Found by CROWN-seq and at least one another method
1	150293885	+	TRUE	TRUE	FALSE	TRUE	FALSE	Found by CROWN-seq and at least one another method
1	150364170	+	TRUE	TRUE	FALSE	FALSE	TRUE	Found by CROWN-seq and at least one another method
1	150487435	+	TRUE	TRUE	FALSE	TRUE	FALSE	Found by CROWN-seq and at least one another method
1	150515782	+	FALSE	FALSE	FALSE	FALSE	TRUE	Closest annotation <100 nt
1	150579610	-	TRUE	TRUE	TRUE	TRUE	TRUE	Found by CROWN-seq and at least one another method
1	150629577	-	TRUE	TRUE	FALSE	FALSE	TRUE	Found by CROWN-seq and at least one another method
1	150629596	-	TRUE	TRUE	TRUE	TRUE	FALSE	Found by CROWN-seq and at least one another method
1	150629606	-	TRUE	TRUE	FALSE	FALSE	TRUE	Found by CROWN-seq and at least one another method
1	150629612	-	TRUE	TRUE	FALSE	TRUE	FALSE	Found by CROWN-seq and at least one another method
1	151059573	-	TRUE	TRUE	FALSE	TRUE	FALSE	Found by CROWN-seq and at least one another method
1	151060411	+	FALSE	TRUE	FALSE	TRUE	FALSE	Low coverage
1	151070619	+	TRUE	TRUE	FALSE	FALSE	TRUE	Found by CROWN-seq and at least one another method
1	151166044	+	FALSE	TRUE	FALSE	FALSE	TRUE	Low coverage
1	151166144	+	TRUE	TRUE	FALSE	TRUE	FALSE	Found by CROWN-seq and at least one another method
1	151190173	-	TRUE	TRUE	TRUE	FALSE	FALSE	Found by CROWN-seq and at least one another method
1	151190197	-	TRUE	TRUE	FALSE	TRUE	FALSE	Found by CROWN-seq and at least one another method
1	151254754	+	TRUE	TRUE	TRUE	FALSE	FALSE	Found by CROWN-seq and at least one another method
1	151254765	+	TRUE	TRUE	FALSE	TRUE	FALSE	Found by CROWN-seq and at least one another method
1	151282299	+	TRUE	TRUE	FALSE	TRUE	FALSE	Found by CROWN-seq and at least one another method
1	151327400	-	TRUE	TRUE	FALSE	TRUE	FALSE	Found by CROWN-seq and at least one another method
1	151327416	-	TRUE	TRUE	FALSE	TRUE	FALSE	Found by CROWN-seq and at least one another method
1	151327669	-	TRUE	TRUE	FALSE	TRUE	FALSE	Found by CROWN-seq and at least one another method
1	151327699	-	TRUE	TRUE	FALSE	FALSE	TRUE	Found by CROWN-seq and at least one another method
1	151347249	-	TRUE	TRUE	FALSE	FALSE	TRUE	Found by CROWN-seq and at least one another method
1	151347265	-	TRUE	TRUE	FALSE	FALSE	TRUE	Found by CROWN-seq and at least one another method
1	151347293	-	TRUE	TRUE	FALSE	FALSE	TRUE	Found by CROWN-seq and at least one another method
1	151399564	+	TRUE	TRUE	TRUE	FALSE	FALSE	Found by CROWN-seq and at least one another method
1	151459179	-	TRUE	TRUE	FALSE	TRUE	FALSE	Found by CROWN-seq and at least one another method
1	151540309	+	TRUE	TRUE	FALSE	TRUE	TRUE	Found by CROWN-seq and at least one another method
1	151763496	-	TRUE	TRUE	TRUE	FALSE	FALSE	Found by CROWN-seq and at least one another method
1	151993842	-	TRUE	TRUE	TRUE	FALSE	FALSE	Found by CROWN-seq and at least one another method
1	151993859	-	TRUE	TRUE	FALSE	FALSE	TRUE	Found by CROWN-seq and at least one another method
1	152036972	-	TRUE	TRUE	TRUE	FALSE	FALSE	Found by CROWN-seq and at least one another method
1	152037016	-	TRUE	TRUE	FALSE	TRUE	TRUE	Found by CROWN-seq and at least one another method
1	153627505	-	TRUE	TRUE	FALSE	FALSE	TRUE	Found by CROWN-seq and at least one another method
1	153627597	-	TRUE	TRUE	FALSE	FALSE	TRUE	Found by CROWN-seq and at least one another method
1	153634023	+	TRUE	TRUE	FALSE	FALSE	TRUE	Found by CROWN-seq and at least one another method
1	153634051	+	TRUE	TRUE	FALSE	FALSE	TRUE	Found by CROWN-seq and at least one another method
1	153634059	+	TRUE	TRUE	FALSE	TRUE	FALSE	Found by CROWN-seq and at least one another method
1	153634075	+	TRUE	TRUE	TRUE	FALSE	FALSE	Found by CROWN-seq and at least one another method
1	153670987	-	TRUE	TRUE	TRUE	TRUE	FALSE	Found by CROWN-seq and at least one another method
1	153963515	-	TRUE	TRUE	FALSE	TRUE	FALSE	Found by CROWN-seq and at least one another method
1	153963537	-	TRUE	TRUE	FALSE	TRUE	FALSE	Found by CROWN-seq and at least one another method
1	153963549	-	TRUE	TRUE	TRUE	FALSE	FALSE	Found by CROWN-seq and at least one another method
1	153963550	-	TRUE	TRUE	TRUE	FALSE	FALSE	Found by CROWN-seq and at least one another method
1	153977658	-	TRUE	TRUE	TRUE	FALSE	FALSE	Found by CROWN-seq and at least one another method
1	153977674	-	TRUE	TRUE	FALSE	TRUE	FALSE	Found by CROWN-seq and at least one another method
1	153977696	-	TRUE	TRUE	FALSE	TRUE	FALSE	Found by CROWN-seq and at least one another method
1	154183193	-	TRUE	TRUE	FALSE	TRUE	FALSE	Found by CROWN-seq and at least one another method
1	154183197	-	TRUE	TRUE	FALSE	TRUE	FALSE	Found by CROWN-seq and at least one another method
1	154183203	-	TRUE	TRUE	FALSE	TRUE	FALSE	Found by CROWN-seq and at least one another method
1	154183218	-	TRUE	TRUE	TRUE	FALSE	FALSE	Found by CROWN-seq and at least one another method
1	154220637	-	TRUE	TRUE	TRUE	FALSE	FALSE	Found by CROWN-seq and at least one another method
1	154220978	+	TRUE	TRUE	TRUE	FALSE	FALSE	Found by CROWN-seq and at least one another method
1	154272641	+	TRUE	TRUE	TRUE	TRUE	FALSE	Found by CROWN-seq and at least one another method
1	154272649	+	TRUE	TRUE	FALSE	TRUE	FALSE	Found by CROWN-seq and at least one another method
1	154325525	+	TRUE	TRUE	FALSE	TRUE	FALSE	Found by CROWN-seq and at least one another method
1	154970747	-	TRUE	TRUE	FALSE	FALSE	TRUE	Found by CROWN-seq and at least one another method
1	154974398	-	TRUE	TRUE	FALSE	TRUE	FALSE	Found by CROWN-seq and at least one another method
1	154974406	-	TRUE	TRUE	FALSE	FALSE	TRUE	Found by CROWN-seq and at least one another method
1	154974447	-	FALSE	TRUE	FALSE	FALSE	TRUE	Low coverage
1	154974655	+	TRUE	TRUE	FALSE	TRUE	FALSE	Found by CROWN-seq and at least one another method
1	154974661	+	TRUE	TRUE	FALSE	TRUE	FALSE	Found by CROWN-seq and at least one another method
1	154974666	+	TRUE	TRUE	FALSE	TRUE	FALSE	Found by CROWN-seq and at least one another method
1	154974678	+	TRUE	TRUE	FALSE	TRUE	FALSE	Found by CROWN-seq and at least one another method
1	154983334	+	FALSE	TRUE	FALSE	TRUE	FALSE	Low coverage
1	154983355	+	FALSE	FALSE	FALSE	TRUE	FALSE	Closest annotation <100 nt
1	154983360	+	FALSE	TRUE	FALSE	TRUE	FALSE	Low coverage
1	154983363	+	FALSE	TRUE	FALSE	TRUE	FALSE	Low coverage
1	154983368	+	TRUE	TRUE	FALSE	TRUE	FALSE	Found by CROWN-seq and at least one another method
1	154983390	+	FALSE	TRUE	FALSE	FALSE	TRUE	Low coverage
1	155127876	+	TRUE	TRUE	FALSE	TRUE	FALSE	Found by CROWN-seq and at least one another method
1	155135828	+	TRUE	TRUE	FALSE	TRUE	FALSE	Found by CROWN-seq and at least one another method
1	155135836	+	TRUE	TRUE	FALSE	TRUE	FALSE	Found by CROWN-seq and at least one another method
1	155135852	+	TRUE	TRUE	TRUE	TRUE	FALSE	Found by CROWN-seq and at least one another method
1	155135868	+	TRUE	TRUE	FALSE	TRUE	FALSE	Found by CROWN-seq and at least one another method
1	155140528	-	TRUE	TRUE	FALSE	TRUE	TRUE	Found by CROWN-seq and at least one another method
1	155140531	-	TRUE	TRUE	TRUE	TRUE	FALSE	Found by CROWN-seq and at least one another method
1	155140544	-	TRUE	TRUE	FALSE	TRUE	FALSE	Found by CROWN-seq and at least one another method
1	155173257	-	TRUE	TRUE	TRUE	TRUE	FALSE	Found by CROWN-seq and at least one another method
1	155173284	-	TRUE	TRUE	FALSE	TRUE	FALSE	Found by CROWN-seq and at least one another method
1	155209238	+	TRUE	TRUE	TRUE	TRUE	FALSE	Found by CROWN-seq and at least one another method
1	155209249	+	TRUE	TRUE	FALSE	TRUE	FALSE	Found by CROWN-seq and at least one another method
1	155241246	-	TRUE	TRUE	TRUE	FALSE	FALSE	Found by CROWN-seq and at least one another method
1	155244627	-	TRUE	TRUE	TRUE	FALSE	FALSE	Found by CROWN-seq and at least one another method
1	155255477	-	TRUE	TRUE	FALSE	FALSE	TRUE	Found by CROWN-seq and at least one another method
1	155255483	-	TRUE	TRUE	TRUE	FALSE	TRUE	Found by CROWN-seq and at least one another method
1	155262266	-	TRUE	TRUE	TRUE	TRUE	FALSE	Found by CROWN-seq and at least one another method
1	155262360	-	TRUE	TRUE	FALSE	TRUE	FALSE	Found by CROWN-seq and at least one another method
1	155273486	-	TRUE	TRUE	TRUE	FALSE	TRUE	Found by CROWN-seq and at least one another method
1	155308833	+	TRUE	TRUE	TRUE	FALSE	FALSE	Found by CROWN-seq and at least one another method
1	155308838	+	TRUE	TRUE	TRUE	FALSE	FALSE	Found by CROWN-seq and at least one another method
1	155308840	+	TRUE	TRUE	TRUE	TRUE	FALSE	Found by CROWN-seq and at least one another method
1	155308873	+	TRUE	TRUE	FALSE	TRUE	FALSE	Found by CROWN-seq and at least one another method
1	155308914	+	TRUE	TRUE	FALSE	TRUE	FALSE	Found by CROWN-seq and at least one another method
1	155324519	+	TRUE	TRUE	FALSE	TRUE	FALSE	Found by CROWN-seq and at least one another method
1	155562964	+	FALSE	TRUE	FALSE	TRUE	FALSE	Low coverage
1	155610241	+	TRUE	TRUE	FALSE	TRUE	FALSE	Found by CROWN-seq and at least one another method
1	155610246	+	FALSE	TRUE	FALSE	TRUE	FALSE	Low coverage
1	155745818	+	FALSE	FALSE	FALSE	TRUE	FALSE	Closest annotation <100 nt
1	155745821	+	FALSE	FALSE	FALSE	TRUE	FALSE	Closest annotation <100 nt
1	155934407	-	TRUE	TRUE	TRUE	TRUE	FALSE	Found by CROWN-seq and at least one another method
1	155934413	-	TRUE	TRUE	FALSE	TRUE	FALSE	Found by CROWN-seq and at least one another method
1	155978542	-	TRUE	TRUE	FALSE	FALSE	TRUE	Found by CROWN-seq and at least one another method
1	156054782	+	TRUE	TRUE	FALSE	TRUE	FALSE	Found by CROWN-seq and at least one another method
1	156054797	+	TRUE	TRUE	FALSE	TRUE	FALSE	Found by CROWN-seq and at least one another method
1	156054803	+	FALSE	TRUE	TRUE	FALSE	FALSE	Low coverage
1	156114711	+	TRUE	TRUE	TRUE	FALSE	TRUE	Found by CROWN-seq and at least one another method
1	156194103	+	TRUE	TRUE	FALSE	TRUE	FALSE	Found by CROWN-seq and at least one another method
1	156194112	+	TRUE	TRUE	FALSE	TRUE	FALSE	Found by CROWN-seq and at least one another method
1	156194117	+	TRUE	TRUE	FALSE	TRUE	FALSE	Found by CROWN-seq and at least one another method
1	156213007	+	TRUE	TRUE	TRUE	FALSE	FALSE	Found by CROWN-seq and at least one another method
1	156282807	-	TRUE	TRUE	FALSE	TRUE	FALSE	Found by CROWN-seq and at least one another method
1	156282829	-	TRUE	TRUE	FALSE	TRUE	FALSE	Found by CROWN-seq and at least one another method
1	156282935	+	TRUE	TRUE	FALSE	FALSE	TRUE	Found by CROWN-seq and at least one another method
1	156338290	-	TRUE	TRUE	FALSE	TRUE	FALSE	Found by CROWN-seq and at least one another method
1	156572565	-	TRUE	TRUE	FALSE	FALSE	TRUE	Found by CROWN-seq and at least one another method
1	156591805	+	TRUE	TRUE	FALSE	TRUE	FALSE	Found by CROWN-seq and at least one another method
1	156601479	-	TRUE	TRUE	TRUE	FALSE	FALSE	Found by CROWN-seq and at least one another method
1	156728433	-	TRUE	TRUE	FALSE	TRUE	FALSE	Found by CROWN-seq and at least one another method
1	156728510	+	TRUE	TRUE	FALSE	TRUE	FALSE	Found by CROWN-seq and at least one another method
1	156741088	-	TRUE	TRUE	TRUE	TRUE	FALSE	Found by CROWN-seq and at least one another method
1	156741101	-	TRUE	TRUE	FALSE	TRUE	FALSE	Found by CROWN-seq and at least one another method
1	156751684	-	TRUE	TRUE	TRUE	FALSE	FALSE	Found by CROWN-seq and at least one another method
1	156751685	-	TRUE	TRUE	FALSE	TRUE	FALSE	Found by CROWN-seq and at least one another method
1	156751697	-	TRUE	TRUE	FALSE	TRUE	FALSE	Found by CROWN-seq and at least one another method
1	156751737	-	FALSE	FALSE	FALSE	TRUE	FALSE	Closest annotation <100 nt
1	156767539	+	TRUE	TRUE	TRUE	TRUE	FALSE	Found by CROWN-seq and at least one another method
1	157138395	-	TRUE	TRUE	FALSE	TRUE	FALSE	Found by CROWN-seq and at least one another method
1	159925510	-	TRUE	TRUE	TRUE	FALSE	FALSE	Found by CROWN-seq and at least one another method
1	159925517	-	TRUE	TRUE	FALSE	TRUE	FALSE	Found by CROWN-seq and at least one another method
1	159925543	-	TRUE	TRUE	FALSE	TRUE	FALSE	Found by CROWN-seq and at least one another method
1	160098606	-	TRUE	TRUE	TRUE	FALSE	FALSE	Found by CROWN-seq and at least one another method
1	160262451	-	TRUE	TRUE	FALSE	TRUE	FALSE	Found by CROWN-seq and at least one another method
1	160262487	-	TRUE	TRUE	FALSE	TRUE	TRUE	Found by CROWN-seq and at least one another method
1	160262536	-	TRUE	TRUE	TRUE	FALSE	FALSE	Found by CROWN-seq and at least one another method
1	160262549	-	TRUE	TRUE	FALSE	TRUE	TRUE	Found by CROWN-seq and at least one another method
1	160285134	-	TRUE	TRUE	FALSE	TRUE	FALSE	Found by CROWN-seq and at least one another method
1	160285146	-	TRUE	TRUE	TRUE	FALSE	FALSE	Found by CROWN-seq and at least one another method
1	160343277	-	TRUE	TRUE	FALSE	TRUE	FALSE	Found by CROWN-seq and at least one another method
1	160343386	+	TRUE	TRUE	TRUE	FALSE	FALSE	Found by CROWN-seq and at least one another method
1	161045896	-	TRUE	TRUE	FALSE	FALSE	TRUE	Found by CROWN-seq and at least one another method
1	161118037	-	TRUE	TRUE	FALSE	TRUE	TRUE	Found by CROWN-seq and at least one another method
1	161118129	+	TRUE	TRUE	FALSE	TRUE	FALSE	Found by CROWN-seq and at least one another method
1	161132587	-	TRUE	TRUE	FALSE	TRUE	FALSE	Found by CROWN-seq and at least one another method
1	161153995	+	TRUE	TRUE	FALSE	TRUE	FALSE	Found by CROWN-seq and at least one another method
1	161159517	+	TRUE	TRUE	FALSE	TRUE	FALSE	Found by CROWN-seq and at least one another method
1	161202374	+	TRUE	TRUE	FALSE	TRUE	FALSE	Found by CROWN-seq and at least one another method
1	161202380	+	TRUE	TRUE	FALSE	TRUE	FALSE	Found by CROWN-seq and at least one another method
1	161202383	+	TRUE	TRUE	FALSE	TRUE	FALSE	Found by CROWN-seq and at least one another method
1	161226060	+	TRUE	TRUE	TRUE	TRUE	TRUE	Found by CROWN-seq and at least one another method
1	161226063	+	TRUE	TRUE	FALSE	TRUE	TRUE	Found by CROWN-seq and at least one another method
1	161226067	+	TRUE	TRUE	FALSE	TRUE	FALSE	Found by CROWN-seq and at least one another method
1	161314381	+	TRUE	TRUE	TRUE	FALSE	FALSE	Found by CROWN-seq and at least one another method
1	161314403	+	TRUE	TRUE	FALSE	TRUE	FALSE	Found by CROWN-seq and at least one another method
1	161749802	+	TRUE	TRUE	FALSE	TRUE	FALSE	Found by CROWN-seq and at least one another method
1	161766324	+	TRUE	TRUE	TRUE	FALSE	FALSE	Found by CROWN-seq and at least one another method
1	164356745	+	FALSE	TRUE	TRUE	FALSE	FALSE	Low coverage
1	165698562	-	TRUE	TRUE	TRUE	FALSE	FALSE	Found by CROWN-seq and at least one another method
1	165768889	-	TRUE	TRUE	TRUE	FALSE	FALSE	Found by CROWN-seq and at least one another method
1	165827525	+	TRUE	TRUE	FALSE	TRUE	FALSE	Found by CROWN-seq and at least one another method
1	165827555	+	TRUE	TRUE	FALSE	TRUE	FALSE	Found by CROWN-seq and at least one another method
1	165827558	+	TRUE	TRUE	FALSE	TRUE	FALSE	Found by CROWN-seq and at least one another method
1	165827616	+	TRUE	TRUE	FALSE	TRUE	FALSE	Found by CROWN-seq and at least one another method
1	166876243	-	TRUE	TRUE	FALSE	TRUE	FALSE	Found by CROWN-seq and at least one another method
1	167220891	+	TRUE	TRUE	FALSE	FALSE	TRUE	Found by CROWN-seq and at least one another method
1	167721984	+	TRUE	TRUE	FALSE	TRUE	FALSE	Found by CROWN-seq and at least one another method
1	167935995	-	TRUE	TRUE	TRUE	TRUE	FALSE	Found by CROWN-seq and at least one another method
1	167936696	+	TRUE	TRUE	FALSE	TRUE	FALSE	Found by CROWN-seq and at least one another method
1	168178962	+	TRUE	TRUE	TRUE	TRUE	FALSE	Found by CROWN-seq and at least one another method
1	168226004	+	TRUE	TRUE	FALSE	TRUE	FALSE	Found by CROWN-seq and at least one another method
1	170074652	-	TRUE	TRUE	FALSE	FALSE	TRUE	Found by CROWN-seq and at least one another method
1	171781674	+	TRUE	TRUE	FALSE	TRUE	TRUE	Found by CROWN-seq and at least one another method
1	171781718	+	FALSE	FALSE	FALSE	TRUE	FALSE	Closest annotation <100 nt
1	172444069	-	TRUE	TRUE	TRUE	TRUE	FALSE	Found by CROWN-seq and at least one another method
1	172444099	-	TRUE	TRUE	FALSE	TRUE	FALSE	Found by CROWN-seq and at least one another method
1	173477310	+	TRUE	TRUE	TRUE	FALSE	FALSE	Found by CROWN-seq and at least one another method
1	173477330	+	TRUE	TRUE	FALSE	TRUE	FALSE	Found by CROWN-seq and at least one another method
1	173477372	+	TRUE	TRUE	FALSE	TRUE	FALSE	Found by CROWN-seq and at least one another method
1	173477386	+	TRUE	TRUE	TRUE	FALSE	FALSE	Found by CROWN-seq and at least one another method
1	173714972	+	TRUE	TRUE	FALSE	FALSE	TRUE	Found by CROWN-seq and at least one another method
1	173868356	+	TRUE	TRUE	FALSE	FALSE	TRUE	Found by CROWN-seq and at least one another method
1	173868380	+	TRUE	TRUE	FALSE	FALSE	TRUE	Found by CROWN-seq and at least one another method
1	174159520	+	TRUE	TRUE	FALSE	TRUE	FALSE	Found by CROWN-seq and at least one another method
1	174999435	+	TRUE	TRUE	FALSE	FALSE	TRUE	Found by CROWN-seq and at least one another method
1	175000021	+	TRUE	TRUE	FALSE	TRUE	FALSE	Found by CROWN-seq and at least one another method
1	175023425	-	TRUE	TRUE	TRUE	FALSE	FALSE	Found by CROWN-seq and at least one another method
1	175023435	-	TRUE	TRUE	FALSE	TRUE	FALSE	Found by CROWN-seq and at least one another method
1	179107841	-	FALSE	FALSE	FALSE	TRUE	FALSE	Closest annotation >=100 nt
1	179877803	-	TRUE	TRUE	TRUE	TRUE	TRUE	Found by CROWN-seq and at least one another method
1	179882262	+	FALSE	TRUE	FALSE	FALSE	TRUE	Low coverage
1	180154869	+	TRUE	TRUE	TRUE	FALSE	FALSE	Found by CROWN-seq and at least one another method
1	180632022	+	FALSE	TRUE	FALSE	FALSE	TRUE	Low coverage
1	182391790	-	TRUE	TRUE	TRUE	TRUE	FALSE	Found by CROWN-seq and at least one another method
1	182839350	+	TRUE	TRUE	TRUE	FALSE	FALSE	Found by CROWN-seq and at least one another method
1	183418373	-	TRUE	TRUE	FALSE	FALSE	TRUE	Found by CROWN-seq and at least one another method
1	183635754	-	TRUE	TRUE	FALSE	TRUE	FALSE	Found by CROWN-seq and at least one another method
1	183635768	-	TRUE	TRUE	FALSE	FALSE	TRUE	Found by CROWN-seq and at least one another method
1	183635783	-	TRUE	TRUE	FALSE	TRUE	FALSE	Found by CROWN-seq and at least one another method
1	184051730	+	TRUE	TRUE	TRUE	FALSE	FALSE	Found by CROWN-seq and at least one another method
1	184387147	+	FALSE	TRUE	FALSE	FALSE	TRUE	Low coverage
1	185045558	+	TRUE	TRUE	TRUE	FALSE	FALSE	Found by CROWN-seq and at least one another method
1	185156950	-	TRUE	TRUE	TRUE	FALSE	FALSE	Found by CROWN-seq and at least one another method
1	185317243	-	TRUE	TRUE	TRUE	TRUE	FALSE	Found by CROWN-seq and at least one another method
1	186680345	-	FALSE	TRUE	FALSE	FALSE	TRUE	Low coverage
1	192809041	+	TRUE	TRUE	FALSE	TRUE	TRUE	Found by CROWN-seq and at least one another method
1	193105430	-	TRUE	TRUE	FALSE	TRUE	FALSE	Found by CROWN-seq and at least one another method
1	193122004	+	TRUE	TRUE	FALSE	FALSE	TRUE	Found by CROWN-seq and at least one another method
1	193122034	+	TRUE	TRUE	FALSE	FALSE	TRUE	Found by CROWN-seq and at least one another method
1	193862384	+	FALSE	FALSE	TRUE	FALSE	FALSE	Closest annotation >=100 nt
1	200738914	+	FALSE	TRUE	TRUE	FALSE	FALSE	Low coverage
1	201154268	-	FALSE	TRUE	FALSE	TRUE	FALSE	Low coverage
1	201469134	-	TRUE	TRUE	FALSE	TRUE	TRUE	Found by CROWN-seq and at least one another method
1	201648632	+	FALSE	TRUE	FALSE	FALSE	TRUE	Low coverage
1	201955503	+	TRUE	TRUE	TRUE	TRUE	FALSE	Found by CROWN-seq and at least one another method
1	201955506	+	TRUE	TRUE	FALSE	TRUE	FALSE	Found by CROWN-seq and at least one another method
1	201955515	+	TRUE	TRUE	FALSE	TRUE	FALSE	Found by CROWN-seq and at least one another method
1	201982652	+	TRUE	TRUE	FALSE	TRUE	FALSE	Found by CROWN-seq and at least one another method
1	202199494	+	FALSE	FALSE	FALSE	TRUE	FALSE	Closest annotation >=100 nt
1	202348702	+	TRUE	TRUE	FALSE	FALSE	TRUE	Found by CROWN-seq and at least one another method
1	202348705	+	TRUE	TRUE	FALSE	FALSE	TRUE	Found by CROWN-seq and at least one another method
1	202889132	-	TRUE	TRUE	FALSE	TRUE	FALSE	Found by CROWN-seq and at least one another method
1	202967255	-	TRUE	TRUE	TRUE	FALSE	FALSE	Found by CROWN-seq and at least one another method
1	203007386	+	TRUE	TRUE	FALSE	TRUE	FALSE	Found by CROWN-seq and at least one another method
1	203305519	+	TRUE	TRUE	FALSE	TRUE	FALSE	Found by CROWN-seq and at least one another method
1	203795623	+	TRUE	TRUE	FALSE	FALSE	TRUE	Found by CROWN-seq and at least one another method
1	203795663	+	FALSE	FALSE	FALSE	TRUE	FALSE	Closest annotation <100 nt
1	203795680	+	FALSE	FALSE	FALSE	TRUE	FALSE	Closest annotation <100 nt
1	203861603	+	TRUE	TRUE	TRUE	FALSE	FALSE	Found by CROWN-seq and at least one another method
1	204152044	-	TRUE	TRUE	FALSE	FALSE	TRUE	Found by CROWN-seq and at least one another method
1	204411817	-	TRUE	TRUE	TRUE	FALSE	FALSE	Found by CROWN-seq and at least one another method
1	204516406	+	TRUE	TRUE	TRUE	TRUE	FALSE	Found by CROWN-seq and at least one another method
1	205121975	-	TRUE	TRUE	FALSE	TRUE	FALSE	Found by CROWN-seq and at least one another method
1	205269677	+	FALSE	FALSE	FALSE	TRUE	FALSE	Closest annotation >=100 nt
1	205351221	+	FALSE	TRUE	TRUE	FALSE	FALSE	Low coverage
1	205504563	+	TRUE	TRUE	FALSE	FALSE	TRUE	Found by CROWN-seq and at least one another method
1	205718481	-	FALSE	FALSE	FALSE	TRUE	FALSE	Closest annotation >=100 nt
1	205750178	-	TRUE	TRUE	FALSE	FALSE	TRUE	Found by CROWN-seq and at least one another method
1	205750182	-	TRUE	TRUE	TRUE	FALSE	TRUE	Found by CROWN-seq and at least one another method
1	205775462	-	FALSE	TRUE	FALSE	FALSE	TRUE	Low coverage
1	205813183	-	TRUE	TRUE	TRUE	FALSE	FALSE	Found by CROWN-seq and at least one another method
1	205813198	-	TRUE	TRUE	FALSE	TRUE	FALSE	Found by CROWN-seq and at least one another method
1	206202870	-	FALSE	FALSE	FALSE	TRUE	FALSE	Closest annotation <100 nt
1	206203545	+	FALSE	FALSE	FALSE	TRUE	FALSE	Closest annotation <100 nt
1	206203565	+	FALSE	FALSE	FALSE	TRUE	FALSE	Closest annotation <100 nt
1	206461128	+	FALSE	FALSE	FALSE	TRUE	FALSE	Closest annotation >=100 nt
1	206635536	+	TRUE	TRUE	FALSE	TRUE	FALSE	Found by CROWN-seq and at least one another method
1	207051005	-	FALSE	TRUE	TRUE	FALSE	FALSE	Low coverage
1	207321499	+	FALSE	TRUE	FALSE	FALSE	TRUE	Low coverage
1	207321651	+	TRUE	TRUE	TRUE	FALSE	FALSE	Found by CROWN-seq and at least one another method
1	207752086	+	TRUE	TRUE	TRUE	TRUE	FALSE	Found by CROWN-seq and at least one another method
1	208244262	-	FALSE	TRUE	FALSE	FALSE	TRUE	Low coverage
1	210778263	+	FALSE	FALSE	FALSE	TRUE	FALSE	Closest annotation >=100 nt
1	211259388	+	TRUE	TRUE	FALSE	FALSE	TRUE	Found by CROWN-seq and at least one another method
1	211675621	-	TRUE	TRUE	FALSE	FALSE	TRUE	Found by CROWN-seq and at least one another method
1	211675627	-	TRUE	TRUE	TRUE	FALSE	FALSE	Found by CROWN-seq and at least one another method
1	212035544	-	TRUE	TRUE	TRUE	FALSE	FALSE	Found by CROWN-seq and at least one another method
1	212608761	+	TRUE	TRUE	FALSE	TRUE	TRUE	Found by CROWN-seq and at least one another method
1	212699980	-	FALSE	TRUE	FALSE	FALSE	TRUE	Low coverage
1	212791777	-	TRUE	TRUE	FALSE	TRUE	FALSE	Found by CROWN-seq and at least one another method
1	212791779	-	TRUE	TRUE	TRUE	FALSE	FALSE	Found by CROWN-seq and at least one another method
1	212950541	+	TRUE	TRUE	FALSE	FALSE	TRUE	Found by CROWN-seq and at least one another method
1	212950584	+	TRUE	TRUE	FALSE	FALSE	TRUE	Found by CROWN-seq and at least one another method
1	212950594	+	TRUE	TRUE	TRUE	FALSE	TRUE	Found by CROWN-seq and at least one another method
1	213015867	-	TRUE	TRUE	FALSE	TRUE	TRUE	Found by CROWN-seq and at least one another method
1	213988000	+	FALSE	TRUE	FALSE	FALSE	TRUE	Low coverage
1	214603195	+	TRUE	TRUE	FALSE	TRUE	TRUE	Found by CROWN-seq and at least one another method
1	214603197	+	TRUE	TRUE	TRUE	FALSE	FALSE	Found by CROWN-seq and at least one another method
1	215567304	+	TRUE	TRUE	TRUE	TRUE	FALSE	Found by CROWN-seq and at least one another method
1	217631344	+	TRUE	TRUE	FALSE	FALSE	TRUE	Found by CROWN-seq and at least one another method
1	217631353	+	TRUE	TRUE	FALSE	FALSE	TRUE	Found by CROWN-seq and at least one another method
1	218285287	+	TRUE	TRUE	FALSE	FALSE	TRUE	Found by CROWN-seq and at least one another method
1	218285293	+	TRUE	TRUE	FALSE	TRUE	TRUE	Found by CROWN-seq and at least one another method
1	218285311	+	TRUE	TRUE	FALSE	TRUE	FALSE	Found by CROWN-seq and at least one another method
1	218285313	+	TRUE	TRUE	TRUE	FALSE	FALSE	Found by CROWN-seq and at least one another method
1	219173850	+	TRUE	TRUE	FALSE	TRUE	FALSE	Found by CROWN-seq and at least one another method
1	219173869	+	TRUE	TRUE	TRUE	TRUE	FALSE	Found by CROWN-seq and at least one another method
1	219173878	+	TRUE	TRUE	FALSE	TRUE	FALSE	Found by CROWN-seq and at least one another method
1	219173884	+	TRUE	TRUE	FALSE	TRUE	FALSE	Found by CROWN-seq and at least one another method
1	219613105	-	TRUE	TRUE	FALSE	TRUE	FALSE	Found by CROWN-seq and at least one another method
1	220046440	-	TRUE	TRUE	FALSE	TRUE	FALSE	Found by CROWN-seq and at least one another method
1	220046530	-	TRUE	TRUE	TRUE	FALSE	FALSE	Found by CROWN-seq and at least one another method
1	220089713	-	FALSE	TRUE	TRUE	FALSE	FALSE	Low coverage
1	220094132	+	TRUE	TRUE	TRUE	FALSE	FALSE	Found by CROWN-seq and at least one another method
1	220786873	+	TRUE	TRUE	TRUE	FALSE	FALSE	Found by CROWN-seq and at least one another method
1	221742089	-	TRUE	TRUE	FALSE	FALSE	TRUE	Found by CROWN-seq and at least one another method
1	222712471	-	FALSE	TRUE	TRUE	FALSE	FALSE	Low coverage
1	222712564	+	TRUE	TRUE	FALSE	FALSE	TRUE	Found by CROWN-seq and at least one another method
1	223857457	-	FALSE	TRUE	TRUE	FALSE	FALSE	Low coverage
1	223992594	-	FALSE	TRUE	FALSE	TRUE	FALSE	Low coverage
1	224114111	+	TRUE	TRUE	FALSE	TRUE	FALSE	Found by CROWN-seq and at least one another method
1	224114116	+	TRUE	TRUE	TRUE	FALSE	FALSE	Found by CROWN-seq and at least one another method
1	224114119	+	TRUE	TRUE	FALSE	TRUE	FALSE	Found by CROWN-seq and at least one another method
1	224183238	+	TRUE	TRUE	TRUE	FALSE	FALSE	Found by CROWN-seq and at least one another method
1	224183240	+	TRUE	TRUE	FALSE	FALSE	TRUE	Found by CROWN-seq and at least one another method
1	224183243	+	TRUE	TRUE	FALSE	TRUE	TRUE	Found by CROWN-seq and at least one another method
1	224183248	+	TRUE	TRUE	FALSE	TRUE	FALSE	Found by CROWN-seq and at least one another method
1	224356860	+	TRUE	TRUE	TRUE	FALSE	FALSE	Found by CROWN-seq and at least one another method
1	224434570	-	FALSE	TRUE	TRUE	FALSE	FALSE	Low coverage
1	224434797	-	TRUE	TRUE	TRUE	TRUE	FALSE	Found by CROWN-seq and at least one another method
1	224929692	+	TRUE	TRUE	FALSE	TRUE	FALSE	Found by CROWN-seq and at least one another method
1	225428038	-	TRUE	TRUE	FALSE	TRUE	FALSE	Found by CROWN-seq and at least one another method
1	225428066	-	TRUE	TRUE	TRUE	TRUE	FALSE	Found by CROWN-seq and at least one another method
1	225777832	+	TRUE	TRUE	TRUE	TRUE	FALSE	Found by CROWN-seq and at least one another method
1	225777849	+	TRUE	TRUE	FALSE	TRUE	FALSE	Found by CROWN-seq and at least one another method
1	225924250	-	TRUE	TRUE	FALSE	TRUE	FALSE	Found by CROWN-seq and at least one another method
1	225924278	-	TRUE	TRUE	FALSE	TRUE	FALSE	Found by CROWN-seq and at least one another method
1	225924296	-	TRUE	TRUE	TRUE	FALSE	FALSE	Found by CROWN-seq and at least one another method
1	225999322	-	TRUE	TRUE	FALSE	TRUE	FALSE	Found by CROWN-seq and at least one another method
1	225999343	-	TRUE	TRUE	FALSE	TRUE	FALSE	Found by CROWN-seq and at least one another method
1	226062721	+	TRUE	TRUE	TRUE	TRUE	TRUE	Found by CROWN-seq and at least one another method
1	226083575	+	FALSE	TRUE	FALSE	FALSE	TRUE	Low coverage
1	226083610	+	FALSE	TRUE	FALSE	FALSE	TRUE	Low coverage
1	226186720	-	TRUE	TRUE	TRUE	FALSE	FALSE	Found by CROWN-seq and at least one another method
1	226408096	-	TRUE	TRUE	TRUE	FALSE	FALSE	Found by CROWN-seq and at least one another method
1	226870620	+	TRUE	TRUE	FALSE	TRUE	FALSE	Found by CROWN-seq and at least one another method
1	226940294	+	TRUE	TRUE	FALSE	TRUE	FALSE	Found by CROWN-seq and at least one another method
1	226940298	+	TRUE	TRUE	FALSE	TRUE	FALSE	Found by CROWN-seq and at least one another method
1	226940306	+	FALSE	TRUE	FALSE	TRUE	FALSE	Low coverage
1	227735435	+	TRUE	TRUE	FALSE	TRUE	FALSE	Found by CROWN-seq and at least one another method
1	228082708	+	TRUE	TRUE	FALSE	TRUE	FALSE	Found by CROWN-seq and at least one another method
1	228082717	+	TRUE	TRUE	TRUE	TRUE	FALSE	Found by CROWN-seq and at least one another method
1	228103270	-	TRUE	TRUE	FALSE	TRUE	FALSE	Found by CROWN-seq and at least one another method
1	228103301	-	TRUE	TRUE	FALSE	TRUE	FALSE	Found by CROWN-seq and at least one another method
1	228109281	-	TRUE	TRUE	FALSE	TRUE	FALSE	Found by CROWN-seq and at least one another method
1	228109299	-	TRUE	TRUE	FALSE	TRUE	FALSE	Found by CROWN-seq and at least one another method
1	228109323	-	TRUE	TRUE	TRUE	FALSE	FALSE	Found by CROWN-seq and at least one another method
1	228140273	+	TRUE	TRUE	TRUE	FALSE	FALSE	Found by CROWN-seq and at least one another method
1	228406593	-	FALSE	TRUE	FALSE	TRUE	FALSE	Low coverage
1	229342504	-	TRUE	TRUE	FALSE	TRUE	FALSE	Found by CROWN-seq and at least one another method
1	229508343	-	TRUE	TRUE	TRUE	FALSE	FALSE	Found by CROWN-seq and at least one another method
1	230067235	+	TRUE	TRUE	FALSE	TRUE	FALSE	Found by CROWN-seq and at least one another method
1	230067238	+	TRUE	TRUE	FALSE	TRUE	FALSE	Found by CROWN-seq and at least one another method
1	230323341	-	FALSE	FALSE	FALSE	TRUE	FALSE	Closest annotation >=100 nt
1	230642481	+	TRUE	TRUE	FALSE	TRUE	FALSE	Found by CROWN-seq and at least one another method
1	230868521	-	TRUE	TRUE	FALSE	TRUE	FALSE	Found by CROWN-seq and at least one another method
1	230978847	-	TRUE	TRUE	TRUE	FALSE	FALSE	Found by CROWN-seq and at least one another method
1	230979070	+	TRUE	TRUE	FALSE	FALSE	TRUE	Found by CROWN-seq and at least one another method
1	230979072	+	TRUE	TRUE	FALSE	FALSE	TRUE	Found by CROWN-seq and at least one another method
1	230979094	+	TRUE	TRUE	FALSE	FALSE	TRUE	Found by CROWN-seq and at least one another method
1	231335820	-	FALSE	FALSE	FALSE	TRUE	FALSE	Closest annotation >=100 nt
1	231336338	-	FALSE	FALSE	FALSE	TRUE	FALSE	Closest annotation >=100 nt
1	231337852	-	TRUE	TRUE	TRUE	TRUE	TRUE	Found by CROWN-seq and at least one another method
1	231338293	+	TRUE	TRUE	FALSE	TRUE	FALSE	Found by CROWN-seq and at least one another method
1	231528583	-	FALSE	TRUE	TRUE	FALSE	FALSE	Low coverage
1	231528675	+	TRUE	TRUE	TRUE	FALSE	FALSE	Found by CROWN-seq and at least one another method
1	232950623	+	TRUE	TRUE	FALSE	TRUE	FALSE	Found by CROWN-seq and at least one another method
1	234373377	-	FALSE	TRUE	FALSE	FALSE	TRUE	Low coverage
1	234373456	+	TRUE	TRUE	TRUE	TRUE	FALSE	Found by CROWN-seq and at least one another method
1	234610147	-	TRUE	TRUE	FALSE	TRUE	FALSE	Found by CROWN-seq and at least one another method
1	234610176	-	TRUE	TRUE	FALSE	TRUE	FALSE	Found by CROWN-seq and at least one another method
1	235128871	-	TRUE	TRUE	TRUE	FALSE	FALSE	Found by CROWN-seq and at least one another method
1	235161256	-	TRUE	TRUE	FALSE	TRUE	TRUE	Found by CROWN-seq and at least one another method
1	235161273	-	TRUE	TRUE	FALSE	FALSE	TRUE	Found by CROWN-seq and at least one another method
1	235328570	+	TRUE	TRUE	FALSE	TRUE	TRUE	Found by CROWN-seq and at least one another method
1	235328589	+	TRUE	TRUE	TRUE	FALSE	FALSE	Found by CROWN-seq and at least one another method
1	235367430	+	TRUE	TRUE	FALSE	TRUE	FALSE	Found by CROWN-seq and at least one another method
1	235367455	+	TRUE	TRUE	TRUE	TRUE	FALSE	Found by CROWN-seq and at least one another method
1	236795292	+	TRUE	TRUE	FALSE	TRUE	FALSE	Found by CROWN-seq and at least one another method
1	236795349	+	TRUE	TRUE	FALSE	FALSE	TRUE	Found by CROWN-seq and at least one another method
1	240206852	+	FALSE	FALSE	FALSE	TRUE	FALSE	Closest annotation <100 nt
1	241519749	-	TRUE	TRUE	TRUE	FALSE	FALSE	Found by CROWN-seq and at least one another method
1	241848227	+	TRUE	TRUE	TRUE	FALSE	FALSE	Found by CROWN-seq and at least one another method
1	243255203	-	TRUE	TRUE	TRUE	FALSE	FALSE	Found by CROWN-seq and at least one another method
1	244653104	+	TRUE	TRUE	FALSE	TRUE	FALSE	Found by CROWN-seq and at least one another method
1	244653105	+	FALSE	TRUE	TRUE	FALSE	FALSE	Low coverage
1	244750553	+	FALSE	FALSE	FALSE	TRUE	FALSE	Closest annotation >=100 nt
1	244750661	+	FALSE	FALSE	FALSE	TRUE	FALSE	Closest annotation >=100 nt
1	244751493	+	FALSE	FALSE	FALSE	TRUE	FALSE	Closest annotation >=100 nt
1	244751753	+	FALSE	FALSE	FALSE	TRUE	FALSE	Closest annotation >=100 nt
1	244864477	-	TRUE	TRUE	FALSE	TRUE	FALSE	Found by CROWN-seq and at least one another method
1	244864482	-	TRUE	TRUE	FALSE	TRUE	FALSE	Found by CROWN-seq and at least one another method
1	244864491	-	TRUE	TRUE	FALSE	TRUE	FALSE	Found by CROWN-seq and at least one another method
1	244864517	-	TRUE	TRUE	FALSE	TRUE	FALSE	Found by CROWN-seq and at least one another method
1	244864570	-	TRUE	TRUE	TRUE	FALSE	FALSE	Found by CROWN-seq and at least one another method
1	244970390	+	TRUE	TRUE	FALSE	FALSE	TRUE	Found by CROWN-seq and at least one another method
1	246507279	-	TRUE	TRUE	FALSE	TRUE	FALSE	Found by CROWN-seq and at least one another method
1	246507297	-	TRUE	TRUE	FALSE	TRUE	FALSE	Found by CROWN-seq and at least one another method
1	246566261	-	TRUE	TRUE	FALSE	FALSE	TRUE	Found by CROWN-seq and at least one another method
1	246724387	+	TRUE	TRUE	FALSE	TRUE	FALSE	Found by CROWN-seq and at least one another method
1	248838247	+	TRUE	TRUE	FALSE	TRUE	FALSE	Found by CROWN-seq and at least one another method
1	248858590	-	TRUE	TRUE	FALSE	FALSE	TRUE	Found by CROWN-seq and at least one another method
2	264900	+	TRUE	TRUE	FALSE	TRUE	FALSE	Found by CROWN-seq and at least one another method
2	1648458	-	FALSE	FALSE	FALSE	TRUE	FALSE	Closest annotation >=100 nt
2	3377818	-	TRUE	TRUE	FALSE	TRUE	FALSE	Found by CROWN-seq and at least one another method
2	8682056	+	TRUE	TRUE	TRUE	TRUE	FALSE	Found by CROWN-seq and at least one another method
2	8730692	-	FALSE	FALSE	FALSE	TRUE	FALSE	Closest annotation >=100 nt
2	8837613	-	TRUE	TRUE	TRUE	TRUE	FALSE	Found by CROWN-seq and at least one another method
2	9423456	-	TRUE	TRUE	FALSE	TRUE	FALSE	Found by CROWN-seq and at least one another method
2	9423528	-	TRUE	TRUE	TRUE	FALSE	FALSE	Found by CROWN-seq and at least one another method
2	9630997	-	TRUE	TRUE	TRUE	TRUE	FALSE	Found by CROWN-seq and at least one another method
2	9631010	-	TRUE	TRUE	FALSE	TRUE	FALSE	Found by CROWN-seq and at least one another method
2	9631023	-	TRUE	TRUE	FALSE	TRUE	FALSE	Found by CROWN-seq and at least one another method
2	9951693	+	TRUE	TRUE	FALSE	FALSE	TRUE	Found by CROWN-seq and at least one another method
2	10211107	+	FALSE	FALSE	FALSE	TRUE	FALSE	Closest annotation >=100 nt
2	10689975	-	TRUE	TRUE	FALSE	TRUE	FALSE	Found by CROWN-seq and at least one another method
2	10689978	-	TRUE	TRUE	TRUE	FALSE	FALSE	Found by CROWN-seq and at least one another method
2	10690000	+	FALSE	TRUE	FALSE	FALSE	TRUE	Low coverage
2	10690002	+	FALSE	TRUE	FALSE	FALSE	TRUE	Low coverage
2	10812747	-	TRUE	TRUE	FALSE	TRUE	FALSE	Found by CROWN-seq and at least one another method
2	10812754	-	TRUE	TRUE	FALSE	TRUE	FALSE	Found by CROWN-seq and at least one another method
2	12740790	+	FALSE	FALSE	FALSE	TRUE	FALSE	Closest annotation >=100 nt
2	15591868	+	TRUE	TRUE	TRUE	TRUE	FALSE	Found by CROWN-seq and at least one another method
2	15591906	+	TRUE	TRUE	FALSE	TRUE	FALSE	Found by CROWN-seq and at least one another method
2	17753806	-	TRUE	TRUE	FALSE	TRUE	FALSE	Found by CROWN-seq and at least one another method
2	20051653	-	TRUE	TRUE	FALSE	TRUE	FALSE	Found by CROWN-seq and at least one another method
2	20051663	-	TRUE	TRUE	TRUE	FALSE	FALSE	Found by CROWN-seq and at least one another method
2	20051671	-	TRUE	TRUE	FALSE	TRUE	FALSE	Found by CROWN-seq and at least one another method
2	20225130	-	TRUE	TRUE	FALSE	FALSE	TRUE	Found by CROWN-seq and at least one another method
2	20447074	+	TRUE	TRUE	TRUE	TRUE	FALSE	Found by CROWN-seq and at least one another method
2	20651079	-	TRUE	TRUE	FALSE	TRUE	FALSE	Found by CROWN-seq and at least one another method
2	20651097	-	TRUE	TRUE	FALSE	TRUE	FALSE	Found by CROWN-seq and at least one another method
2	23385179	+	TRUE	TRUE	FALSE	TRUE	FALSE	Found by CROWN-seq and at least one another method
2	24049743	+	TRUE	TRUE	FALSE	FALSE	TRUE	Found by CROWN-seq and at least one another method
2	24076347	-	TRUE	TRUE	FALSE	TRUE	FALSE	Found by CROWN-seq and at least one another method
2	24076360	-	TRUE	TRUE	TRUE	TRUE	FALSE	Found by CROWN-seq and at least one another method
2	24793425	+	TRUE	TRUE	FALSE	TRUE	FALSE	Found by CROWN-seq and at least one another method
2	25342468	-	TRUE	TRUE	FALSE	FALSE	TRUE	Found by CROWN-seq and at least one another method
2	25342514	-	FALSE	TRUE	FALSE	FALSE	TRUE	Low coverage
2	25878464	-	TRUE	TRUE	TRUE	FALSE	TRUE	Found by CROWN-seq and at least one another method
2	25878487	-	TRUE	TRUE	FALSE	FALSE	TRUE	Found by CROWN-seq and at least one another method
2	25982532	-	TRUE	TRUE	FALSE	FALSE	TRUE	Found by CROWN-seq and at least one another method
2	26034100	+	TRUE	TRUE	FALSE	TRUE	FALSE	Found by CROWN-seq and at least one another method
2	26034113	+	TRUE	TRUE	TRUE	FALSE	FALSE	Found by CROWN-seq and at least one another method
2	26034118	+	TRUE	TRUE	FALSE	TRUE	FALSE	Found by CROWN-seq and at least one another method
2	26244604	-	TRUE	TRUE	FALSE	TRUE	FALSE	Found by CROWN-seq and at least one another method
2	26244630	-	TRUE	TRUE	TRUE	FALSE	FALSE	Found by CROWN-seq and at least one another method
2	26244928	+	TRUE	TRUE	FALSE	TRUE	TRUE	Found by CROWN-seq and at least one another method
2	26244939	+	TRUE	TRUE	TRUE	FALSE	TRUE	Found by CROWN-seq and at least one another method
2	26389173	+	FALSE	FALSE	FALSE	TRUE	FALSE	Closest annotation >=100 nt
2	26786071	+	TRUE	TRUE	TRUE	FALSE	FALSE	Found by CROWN-seq and at least one another method
2	27032949	+	TRUE	TRUE	FALSE	FALSE	TRUE	Found by CROWN-seq and at least one another method
2	27051668	+	TRUE	TRUE	TRUE	FALSE	FALSE	Found by CROWN-seq and at least one another method
2	27134620	-	TRUE	TRUE	FALSE	TRUE	FALSE	Found by CROWN-seq and at least one another method
2	27212018	+	TRUE	TRUE	FALSE	TRUE	FALSE	Found by CROWN-seq and at least one another method
2	27217369	+	TRUE	TRUE	FALSE	TRUE	FALSE	Found by CROWN-seq and at least one another method
2	27217388	+	TRUE	TRUE	FALSE	TRUE	FALSE	Found by CROWN-seq and at least one another method
2	27307680	-	FALSE	FALSE	FALSE	TRUE	FALSE	Closest annotation >=100 nt
2	27323066	-	TRUE	TRUE	FALSE	TRUE	FALSE	Found by CROWN-seq and at least one another method
2	27323070	-	TRUE	TRUE	FALSE	TRUE	FALSE	Found by CROWN-seq and at least one another method
2	27323090	-	TRUE	TRUE	FALSE	TRUE	FALSE	Found by CROWN-seq and at least one another method
2	27323097	-	TRUE	TRUE	FALSE	TRUE	FALSE	Found by CROWN-seq and at least one another method
2	27343494	-	FALSE	FALSE	FALSE	TRUE	FALSE	Closest annotation >=100 nt
2	27356764	-	TRUE	TRUE	FALSE	TRUE	TRUE	Found by CROWN-seq and at least one another method
2	27356776	-	TRUE	TRUE	FALSE	TRUE	FALSE	Found by CROWN-seq and at least one another method
2	27356790	-	TRUE	TRUE	FALSE	FALSE	TRUE	Found by CROWN-seq and at least one another method
2	27357056	+	FALSE	TRUE	FALSE	TRUE	FALSE	Low coverage
2	27357067	+	FALSE	TRUE	FALSE	TRUE	FALSE	Low coverage
2	27370324	-	TRUE	TRUE	FALSE	TRUE	FALSE	Found by CROWN-seq and at least one another method
2	27370617	+	TRUE	TRUE	TRUE	FALSE	FALSE	Found by CROWN-seq and at least one another method
2	27370627	+	TRUE	TRUE	FALSE	TRUE	FALSE	Found by CROWN-seq and at least one another method
2	27370636	+	TRUE	TRUE	FALSE	TRUE	FALSE	Found by CROWN-seq and at least one another method
2	27378211	-	FALSE	FALSE	FALSE	TRUE	FALSE	Closest annotation >=100 nt
2	27380724	-	TRUE	TRUE	FALSE	FALSE	TRUE	Found by CROWN-seq and at least one another method
2	27393502	-	FALSE	FALSE	TRUE	FALSE	FALSE	Closest annotation >=100 nt
2	27428626	+	TRUE	TRUE	FALSE	TRUE	FALSE	Found by CROWN-seq and at least one another method
2	27428660	+	TRUE	TRUE	FALSE	TRUE	FALSE	Found by CROWN-seq and at least one another method
2	27583035	+	TRUE	TRUE	TRUE	FALSE	FALSE	Found by CROWN-seq and at least one another method
2	27583047	+	FALSE	TRUE	FALSE	TRUE	FALSE	Low coverage
2	27771719	+	TRUE	TRUE	FALSE	TRUE	FALSE	Found by CROWN-seq and at least one another method
2	27890763	+	TRUE	TRUE	FALSE	TRUE	FALSE	Found by CROWN-seq and at least one another method
2	28751910	+	TRUE	TRUE	TRUE	FALSE	FALSE	Found by CROWN-seq and at least one another method
2	28751914	+	TRUE	TRUE	TRUE	FALSE	FALSE	Found by CROWN-seq and at least one another method
2	28752045	+	TRUE	TRUE	FALSE	TRUE	FALSE	Found by CROWN-seq and at least one another method
2	28894665	+	TRUE	TRUE	TRUE	TRUE	FALSE	Found by CROWN-seq and at least one another method
2	28894690	+	TRUE	TRUE	FALSE	TRUE	FALSE	Found by CROWN-seq and at least one another method
2	30147007	+	TRUE	TRUE	FALSE	FALSE	TRUE	Found by CROWN-seq and at least one another method
2	30910917	-	FALSE	FALSE	FALSE	TRUE	FALSE	Closest annotation >=100 nt
2	32039805	-	TRUE	TRUE	TRUE	FALSE	FALSE	Found by CROWN-seq and at least one another method
2	32039816	-	TRUE	TRUE	FALSE	TRUE	FALSE	Found by CROWN-seq and at least one another method
2	32866869	-	FALSE	FALSE	TRUE	FALSE	FALSE	Closest annotation >=100 nt
2	37084536	+	TRUE	TRUE	FALSE	TRUE	FALSE	Found by CROWN-seq and at least one another method
2	37196498	+	TRUE	TRUE	FALSE	TRUE	FALSE	Found by CROWN-seq and at least one another method
2	38377278	-	FALSE	TRUE	TRUE	FALSE	FALSE	Low coverage
2	38377290	-	TRUE	TRUE	FALSE	FALSE	TRUE	Found by CROWN-seq and at least one another method
2	38602922	-	TRUE	TRUE	TRUE	TRUE	FALSE	Found by CROWN-seq and at least one another method
2	38751359	-	TRUE	TRUE	TRUE	TRUE	FALSE	Found by CROWN-seq and at least one another method
2	38875932	-	FALSE	TRUE	TRUE	FALSE	FALSE	Low coverage
2	38875934	-	TRUE	TRUE	FALSE	TRUE	FALSE	Found by CROWN-seq and at least one another method
2	43226501	-	FALSE	TRUE	FALSE	FALSE	TRUE	Low coverage
2	43596038	-	TRUE	TRUE	FALSE	TRUE	FALSE	Found by CROWN-seq and at least one another method
2	44168877	+	TRUE	TRUE	FALSE	TRUE	FALSE	Found by CROWN-seq and at least one another method
2	44361492	-	TRUE	TRUE	FALSE	TRUE	TRUE	Found by CROWN-seq and at least one another method
2	44361561	-	TRUE	TRUE	FALSE	FALSE	TRUE	Found by CROWN-seq and at least one another method
2	44361576	-	TRUE	TRUE	FALSE	FALSE	TRUE	Found by CROWN-seq and at least one another method
2	44361947	+	TRUE	TRUE	FALSE	TRUE	FALSE	Found by CROWN-seq and at least one another method
2	45009432	-	FALSE	FALSE	FALSE	TRUE	FALSE	Closest annotation <100 nt
2	45009452	-	FALSE	TRUE	FALSE	TRUE	FALSE	Low coverage
2	47176511	-	TRUE	TRUE	FALSE	TRUE	TRUE	Found by CROWN-seq and at least one another method
2	47176514	-	TRUE	TRUE	TRUE	FALSE	FALSE	Found by CROWN-seq and at least one another method
2	47176515	-	TRUE	TRUE	TRUE	FALSE	FALSE	Found by CROWN-seq and at least one another method
2	47176541	-	FALSE	TRUE	TRUE	FALSE	FALSE	Low coverage
2	47783145	+	TRUE	TRUE	FALSE	TRUE	FALSE	Found by CROWN-seq and at least one another method
2	47783147	+	TRUE	TRUE	TRUE	FALSE	FALSE	Found by CROWN-seq and at least one another method
2	53767824	+	TRUE	TRUE	FALSE	TRUE	FALSE	Found by CROWN-seq and at least one another method
2	53786878	-	TRUE	TRUE	FALSE	FALSE	TRUE	Found by CROWN-seq and at least one another method
2	53971047	-	TRUE	TRUE	TRUE	FALSE	FALSE	Found by CROWN-seq and at least one another method
2	55050451	-	TRUE	TRUE	TRUE	FALSE	TRUE	Found by CROWN-seq and at least one another method
2	55269166	-	FALSE	TRUE	TRUE	FALSE	FALSE	Low coverage
2	55419839	-	TRUE	TRUE	TRUE	TRUE	TRUE	Found by CROWN-seq and at least one another method
2	55519674	+	TRUE	TRUE	TRUE	FALSE	FALSE	Found by CROWN-seq and at least one another method
2	60756268	+	TRUE	TRUE	FALSE	FALSE	TRUE	Found by CROWN-seq and at least one another method
2	61017720	+	FALSE	TRUE	TRUE	FALSE	FALSE	Low coverage
2	61144969	-	FALSE	TRUE	FALSE	TRUE	FALSE	Low coverage
2	61145116	+	TRUE	TRUE	FALSE	TRUE	FALSE	Found by CROWN-seq and at least one another method
2	61538216	-	TRUE	TRUE	FALSE	TRUE	FALSE	Found by CROWN-seq and at least one another method
2	61538234	-	TRUE	TRUE	FALSE	TRUE	FALSE	Found by CROWN-seq and at least one another method
2	61538258	-	TRUE	TRUE	FALSE	TRUE	FALSE	Found by CROWN-seq and at least one another method
2	61538261	-	TRUE	TRUE	TRUE	FALSE	FALSE	Found by CROWN-seq and at least one another method
2	61888580	-	TRUE	TRUE	TRUE	FALSE	FALSE	Found by CROWN-seq and at least one another method
2	63588968	+	TRUE	TRUE	TRUE	FALSE	FALSE	Found by CROWN-seq and at least one another method
2	63840971	+	FALSE	TRUE	TRUE	FALSE	TRUE	Low coverage
2	63840990	+	FALSE	FALSE	FALSE	FALSE	TRUE	Closest annotation <100 nt
2	63841013	+	TRUE	TRUE	FALSE	FALSE	TRUE	Found by CROWN-seq and at least one another method
2	64144420	-	TRUE	TRUE	FALSE	TRUE	FALSE	Found by CROWN-seq and at least one another method
2	64988479	+	TRUE	TRUE	FALSE	FALSE	TRUE	Found by CROWN-seq and at least one another method
2	64988486	+	TRUE	TRUE	FALSE	FALSE	TRUE	Found by CROWN-seq and at least one another method
2	64989399	+	TRUE	TRUE	FALSE	FALSE	TRUE	Found by CROWN-seq and at least one another method
2	65130106	-	TRUE	TRUE	TRUE	FALSE	TRUE	Found by CROWN-seq and at least one another method
2	65227826	+	TRUE	TRUE	TRUE	FALSE	FALSE	Found by CROWN-seq and at least one another method
2	65227833	+	TRUE	TRUE	FALSE	TRUE	FALSE	Found by CROWN-seq and at least one another method
2	66391130	+	FALSE	FALSE	FALSE	FALSE	TRUE	Closest annotation >=100 nt
2	68063004	-	TRUE	TRUE	TRUE	FALSE	FALSE	Found by CROWN-seq and at least one another method
2	68252497	-	TRUE	TRUE	TRUE	FALSE	FALSE	Found by CROWN-seq and at least one another method
2	68467294	-	TRUE	TRUE	FALSE	TRUE	FALSE	Found by CROWN-seq and at least one another method
2	69013353	+	TRUE	TRUE	FALSE	FALSE	TRUE	Found by CROWN-seq and at least one another method
2	69013357	+	TRUE	TRUE	FALSE	TRUE	TRUE	Found by CROWN-seq and at least one another method
2	69437435	-	TRUE	TRUE	TRUE	FALSE	TRUE	Found by CROWN-seq and at least one another method
2	69893947	+	TRUE	TRUE	FALSE	FALSE	TRUE	Found by CROWN-seq and at least one another method
2	69893956	+	TRUE	TRUE	FALSE	FALSE	TRUE	Found by CROWN-seq and at least one another method
2	70087477	+	TRUE	TRUE	FALSE	TRUE	FALSE	Found by CROWN-seq and at least one another method
2	70191019	-	TRUE	TRUE	FALSE	FALSE	TRUE	Found by CROWN-seq and at least one another method
2	70248615	-	TRUE	TRUE	TRUE	TRUE	FALSE	Found by CROWN-seq and at least one another method
2	70293615	-	TRUE	TRUE	TRUE	FALSE	FALSE	Found by CROWN-seq and at least one another method
2	70293715	-	TRUE	TRUE	FALSE	TRUE	FALSE	Found by CROWN-seq and at least one another method
2	70293730	-	TRUE	TRUE	FALSE	TRUE	FALSE	Found by CROWN-seq and at least one another method
2	70302025	-	TRUE	TRUE	FALSE	TRUE	FALSE	Found by CROWN-seq and at least one another method
2	71068609	+	FALSE	TRUE	FALSE	FALSE	TRUE	Low coverage
2	71068650	+	TRUE	TRUE	FALSE	TRUE	FALSE	Found by CROWN-seq and at least one another method
2	71130634	+	TRUE	TRUE	TRUE	FALSE	FALSE	Found by CROWN-seq and at least one another method
2	71227103	-	TRUE	TRUE	FALSE	FALSE	TRUE	Found by CROWN-seq and at least one another method
2	72826015	-	TRUE	TRUE	FALSE	FALSE	TRUE	Found by CROWN-seq and at least one another method
2	72887408	+	TRUE	TRUE	FALSE	TRUE	FALSE	Found by CROWN-seq and at least one another method
2	72934029	+	FALSE	FALSE	FALSE	TRUE	FALSE	Closest annotation >=100 nt
2	73071724	-	TRUE	TRUE	TRUE	FALSE	FALSE	Found by CROWN-seq and at least one another method
2	73214245	+	TRUE	TRUE	TRUE	TRUE	FALSE	Found by CROWN-seq and at least one another method
2	73234290	+	TRUE	TRUE	TRUE	FALSE	FALSE	Found by CROWN-seq and at least one another method
2	73386072	+	FALSE	TRUE	FALSE	FALSE	TRUE	Low coverage
2	73780108	-	TRUE	TRUE	TRUE	FALSE	FALSE	Found by CROWN-seq and at least one another method
2	73828983	+	TRUE	TRUE	FALSE	TRUE	FALSE	Found by CROWN-seq and at least one another method
2	73926868	+	TRUE	TRUE	FALSE	TRUE	FALSE	Found by CROWN-seq and at least one another method
2	74147912	-	TRUE	TRUE	TRUE	FALSE	FALSE	Found by CROWN-seq and at least one another method
2	74148140	+	FALSE	TRUE	FALSE	FALSE	TRUE	Low coverage
2	74178879	-	TRUE	TRUE	TRUE	TRUE	FALSE	Found by CROWN-seq and at least one another method
2	74198583	+	TRUE	TRUE	FALSE	TRUE	FALSE	Found by CROWN-seq and at least one another method
2	74198586	+	TRUE	TRUE	FALSE	TRUE	FALSE	Found by CROWN-seq and at least one another method
2	74418631	-	TRUE	TRUE	TRUE	FALSE	FALSE	Found by CROWN-seq and at least one another method
2	74421751	+	TRUE	TRUE	FALSE	TRUE	FALSE	Found by CROWN-seq and at least one another method
2	74426056	-	FALSE	FALSE	FALSE	TRUE	FALSE	Closest annotation >=100 nt
2	74455083	+	TRUE	TRUE	FALSE	FALSE	TRUE	Found by CROWN-seq and at least one another method
2	74455087	+	TRUE	TRUE	TRUE	FALSE	FALSE	Found by CROWN-seq and at least one another method
2	74455093	+	TRUE	TRUE	FALSE	TRUE	TRUE	Found by CROWN-seq and at least one another method
2	74458440	+	TRUE	TRUE	FALSE	FALSE	TRUE	Found by CROWN-seq and at least one another method
2	74465380	-	TRUE	TRUE	FALSE	TRUE	FALSE	Found by CROWN-seq and at least one another method
2	74482987	-	TRUE	TRUE	FALSE	TRUE	FALSE	Found by CROWN-seq and at least one another method
2	74483026	-	TRUE	TRUE	FALSE	FALSE	TRUE	Found by CROWN-seq and at least one another method
2	74483084	+	TRUE	TRUE	FALSE	FALSE	TRUE	Found by CROWN-seq and at least one another method
2	74483089	+	TRUE	TRUE	FALSE	TRUE	FALSE	Found by CROWN-seq and at least one another method
2	74507708	-	TRUE	TRUE	FALSE	TRUE	FALSE	Found by CROWN-seq and at least one another method
2	74529698	-	TRUE	TRUE	FALSE	TRUE	FALSE	Found by CROWN-seq and at least one another method
2	74529750	-	TRUE	TRUE	FALSE	TRUE	FALSE	Found by CROWN-seq and at least one another method
2	74834119	+	TRUE	TRUE	TRUE	TRUE	FALSE	Found by CROWN-seq and at least one another method
2	74834127	+	TRUE	TRUE	FALSE	FALSE	TRUE	Found by CROWN-seq and at least one another method
2	74958643	+	TRUE	TRUE	TRUE	FALSE	TRUE	Found by CROWN-seq and at least one another method
2	75646801	+	TRUE	TRUE	FALSE	TRUE	FALSE	Found by CROWN-seq and at least one another method
2	75710915	-	TRUE	TRUE	FALSE	TRUE	FALSE	Found by CROWN-seq and at least one another method
2	84459277	-	TRUE	TRUE	TRUE	TRUE	FALSE	Found by CROWN-seq and at least one another method
2	85262364	-	FALSE	TRUE	TRUE	FALSE	FALSE	Low coverage
2	85327989	-	TRUE	TRUE	FALSE	TRUE	FALSE	Found by CROWN-seq and at least one another method
2	85354532	-	TRUE	TRUE	TRUE	FALSE	FALSE	Found by CROWN-seq and at least one another method
2	85354769	+	TRUE	TRUE	FALSE	TRUE	FALSE	Found by CROWN-seq and at least one another method
2	85561493	-	TRUE	TRUE	TRUE	FALSE	FALSE	Found by CROWN-seq and at least one another method
2	85577546	+	TRUE	TRUE	FALSE	FALSE	TRUE	Found by CROWN-seq and at least one another method
2	85577563	+	TRUE	TRUE	FALSE	FALSE	TRUE	Found by CROWN-seq and at least one another method
2	85577571	+	TRUE	TRUE	FALSE	FALSE	TRUE	Found by CROWN-seq and at least one another method
2	85595722	+	TRUE	TRUE	TRUE	TRUE	FALSE	Found by CROWN-seq and at least one another method
2	85595748	+	TRUE	TRUE	FALSE	TRUE	FALSE	Found by CROWN-seq and at least one another method
2	85602665	-	TRUE	TRUE	FALSE	FALSE	TRUE	Found by CROWN-seq and at least one another method
2	85612066	-	TRUE	TRUE	FALSE	TRUE	FALSE	Found by CROWN-seq and at least one another method
2	85616175	+	TRUE	TRUE	TRUE	TRUE	FALSE	Found by CROWN-seq and at least one another method
2	85616189	+	TRUE	TRUE	FALSE	TRUE	FALSE	Found by CROWN-seq and at least one another method
2	86105886	-	TRUE	TRUE	FALSE	TRUE	FALSE	Found by CROWN-seq and at least one another method
2	86106223	+	TRUE	TRUE	FALSE	FALSE	TRUE	Found by CROWN-seq and at least one another method
2	86106226	+	TRUE	TRUE	TRUE	FALSE	FALSE	Found by CROWN-seq and at least one another method
2	86106235	+	TRUE	TRUE	FALSE	FALSE	TRUE	Found by CROWN-seq and at least one another method
2	86195438	-	TRUE	TRUE	FALSE	TRUE	FALSE	Found by CROWN-seq and at least one another method
2	86195442	-	TRUE	TRUE	FALSE	TRUE	FALSE	Found by CROWN-seq and at least one another method
2	86195466	-	TRUE	TRUE	TRUE	FALSE	FALSE	Found by CROWN-seq and at least one another method
2	86441371	+	TRUE	TRUE	FALSE	TRUE	FALSE	Found by CROWN-seq and at least one another method
2	86720299	+	FALSE	TRUE	FALSE	TRUE	FALSE	Low coverage
2	88691668	+	TRUE	TRUE	TRUE	FALSE	FALSE	Found by CROWN-seq and at least one another method
2	88691673	+	TRUE	TRUE	FALSE	TRUE	FALSE	Found by CROWN-seq and at least one another method
2	95121959	-	TRUE	TRUE	FALSE	TRUE	FALSE	Found by CROWN-seq and at least one another method
2	95122003	-	TRUE	TRUE	FALSE	TRUE	FALSE	Found by CROWN-seq and at least one another method
2	96208822	-	TRUE	TRUE	FALSE	TRUE	FALSE	Found by CROWN-seq and at least one another method
2	96208849	-	TRUE	TRUE	FALSE	TRUE	FALSE	Found by CROWN-seq and at least one another method
2	96266237	+	TRUE	TRUE	FALSE	TRUE	FALSE	Found by CROWN-seq and at least one another method
2	96305546	-	TRUE	TRUE	TRUE	FALSE	FALSE	Found by CROWN-seq and at least one another method
2	96335778	+	TRUE	TRUE	FALSE	TRUE	FALSE	Found by CROWN-seq and at least one another method
2	96536752	+	TRUE	TRUE	FALSE	TRUE	FALSE	Found by CROWN-seq and at least one another method
2	96638324	-	TRUE	TRUE	FALSE	TRUE	FALSE	Found by CROWN-seq and at least one another method
2	96760902	+	TRUE	TRUE	FALSE	TRUE	FALSE	Found by CROWN-seq and at least one another method
2	96816270	+	TRUE	TRUE	FALSE	TRUE	FALSE	Found by CROWN-seq and at least one another method
2	97094840	-	TRUE	TRUE	FALSE	TRUE	FALSE	Found by CROWN-seq and at least one another method
2	97273297	+	FALSE	FALSE	FALSE	TRUE	FALSE	Closest annotation >=100 nt
2	97646062	+	TRUE	TRUE	TRUE	FALSE	FALSE	Found by CROWN-seq and at least one another method
2	97664014	-	TRUE	TRUE	FALSE	TRUE	FALSE	Found by CROWN-seq and at least one another method
2	97664021	-	TRUE	TRUE	FALSE	TRUE	FALSE	Found by CROWN-seq and at least one another method
2	98608490	-	TRUE	TRUE	FALSE	TRUE	FALSE	Found by CROWN-seq and at least one another method
2	99181022	-	TRUE	TRUE	FALSE	TRUE	FALSE	Found by CROWN-seq and at least one another method
2	99181032	-	TRUE	TRUE	FALSE	FALSE	TRUE	Found by CROWN-seq and at least one another method
2	99181058	-	TRUE	TRUE	FALSE	FALSE	TRUE	Found by CROWN-seq and at least one another method
2	99181061	-	TRUE	TRUE	FALSE	FALSE	TRUE	Found by CROWN-seq and at least one another method
2	99337389	+	TRUE	TRUE	TRUE	FALSE	TRUE	Found by CROWN-seq and at least one another method
2	99337394	+	TRUE	TRUE	FALSE	FALSE	TRUE	Found by CROWN-seq and at least one another method
2	100322483	-	FALSE	TRUE	FALSE	FALSE	TRUE	Low coverage
2	100322501	-	FALSE	TRUE	FALSE	FALSE	TRUE	Low coverage
2	100563001	+	TRUE	TRUE	TRUE	FALSE	FALSE	Found by CROWN-seq and at least one another method
2	101002274	+	TRUE	TRUE	TRUE	FALSE	FALSE	Found by CROWN-seq and at least one another method
2	104856380	+	FALSE	FALSE	FALSE	TRUE	FALSE	Closest annotation >=100 nt
2	105038025	+	TRUE	TRUE	TRUE	FALSE	FALSE	Found by CROWN-seq and at least one another method
2	106194299	-	TRUE	TRUE	FALSE	TRUE	FALSE	Found by CROWN-seq and at least one another method
2	108449206	+	TRUE	TRUE	FALSE	FALSE	TRUE	Found by CROWN-seq and at least one another method
2	108719482	+	TRUE	TRUE	TRUE	FALSE	FALSE	Found by CROWN-seq and at least one another method
2	109987006	+	FALSE	TRUE	FALSE	TRUE	FALSE	Low coverage
2	110212529	-	TRUE	TRUE	FALSE	TRUE	FALSE	Found by CROWN-seq and at least one another method
2	110384442	-	FALSE	TRUE	FALSE	TRUE	FALSE	Low coverage
2	110384499	-	FALSE	TRUE	FALSE	TRUE	FALSE	Low coverage
2	110674307	-	FALSE	FALSE	FALSE	FALSE	TRUE	Closest annotation >=100 nt
2	110678041	-	TRUE	TRUE	FALSE	FALSE	TRUE	Found by CROWN-seq and at least one another method
2	110678063	-	TRUE	TRUE	TRUE	TRUE	TRUE	Found by CROWN-seq and at least one another method
2	111120914	+	TRUE	TRUE	FALSE	FALSE	TRUE	Found by CROWN-seq and at least one another method
2	112055250	+	TRUE	TRUE	FALSE	FALSE	TRUE	Found by CROWN-seq and at least one another method
2	112055325	+	TRUE	TRUE	FALSE	FALSE	TRUE	Found by CROWN-seq and at least one another method
2	112275632	+	TRUE	TRUE	FALSE	FALSE	TRUE	Found by CROWN-seq and at least one another method
2	112574894	+	FALSE	FALSE	FALSE	TRUE	FALSE	Closest annotation >=100 nt
2	112584597	+	TRUE	TRUE	FALSE	TRUE	FALSE	Found by CROWN-seq and at least one another method
2	112645941	+	TRUE	TRUE	FALSE	TRUE	FALSE	Found by CROWN-seq and at least one another method
2	112764609	-	TRUE	TRUE	FALSE	FALSE	TRUE	Found by CROWN-seq and at least one another method
2	112764677	-	TRUE	TRUE	FALSE	FALSE	TRUE	Found by CROWN-seq and at least one another method
2	113627136	-	FALSE	TRUE	FALSE	FALSE	TRUE	Low coverage
2	117814691	+	TRUE	TRUE	FALSE	TRUE	FALSE	Found by CROWN-seq and at least one another method
2	119366816	-	TRUE	TRUE	FALSE	FALSE	TRUE	Found by CROWN-seq and at least one another method
2	119366966	+	TRUE	TRUE	FALSE	TRUE	FALSE	Found by CROWN-seq and at least one another method
2	119366977	+	TRUE	TRUE	TRUE	FALSE	FALSE	Found by CROWN-seq and at least one another method
2	119679203	+	TRUE	TRUE	FALSE	TRUE	FALSE	Found by CROWN-seq and at least one another method
2	120252931	+	TRUE	TRUE	FALSE	TRUE	FALSE	Found by CROWN-seq and at least one another method
2	121649437	-	TRUE	TRUE	FALSE	FALSE	TRUE	Found by CROWN-seq and at least one another method
2	121755662	+	TRUE	TRUE	FALSE	TRUE	FALSE	Found by CROWN-seq and at least one another method
2	127294144	-	TRUE	TRUE	TRUE	TRUE	TRUE	Found by CROWN-seq and at least one another method
2	127526482	-	TRUE	TRUE	TRUE	FALSE	FALSE	Found by CROWN-seq and at least one another method
2	127811171	-	TRUE	TRUE	FALSE	TRUE	TRUE	Found by CROWN-seq and at least one another method
2	127811187	-	TRUE	TRUE	FALSE	FALSE	TRUE	Found by CROWN-seq and at least one another method
2	128318868	-	TRUE	TRUE	FALSE	TRUE	FALSE	Found by CROWN-seq and at least one another method
2	130181688	+	FALSE	TRUE	FALSE	TRUE	FALSE	Low coverage
2	130182198	+	TRUE	TRUE	TRUE	FALSE	FALSE	Found by CROWN-seq and at least one another method
2	130342857	+	TRUE	TRUE	FALSE	TRUE	FALSE	Found by CROWN-seq and at least one another method
2	130342895	+	TRUE	TRUE	TRUE	FALSE	FALSE	Found by CROWN-seq and at least one another method
2	131105336	+	TRUE	TRUE	TRUE	TRUE	FALSE	Found by CROWN-seq and at least one another method
2	131492397	-	TRUE	TRUE	TRUE	TRUE	FALSE	Found by CROWN-seq and at least one another method
2	131492717	-	TRUE	TRUE	FALSE	TRUE	FALSE	Found by CROWN-seq and at least one another method
2	131492767	-	TRUE	TRUE	FALSE	TRUE	FALSE	Found by CROWN-seq and at least one another method
2	134119935	+	TRUE	TRUE	FALSE	TRUE	FALSE	Found by CROWN-seq and at least one another method
2	135531475	+	TRUE	TRUE	FALSE	FALSE	TRUE	Found by CROWN-seq and at least one another method
2	135531484	+	TRUE	TRUE	FALSE	TRUE	FALSE	Found by CROWN-seq and at least one another method
2	135876441	-	TRUE	TRUE	TRUE	FALSE	FALSE	Found by CROWN-seq and at least one another method
2	138459517	-	FALSE	FALSE	TRUE	FALSE	FALSE	Closest annotation >=100 nt
2	142130964	-	TRUE	TRUE	FALSE	FALSE	TRUE	Found by CROWN-seq and at least one another method
2	142130992	-	TRUE	TRUE	FALSE	FALSE	TRUE	Found by CROWN-seq and at least one another method
2	142131016	-	TRUE	TRUE	FALSE	FALSE	TRUE	Found by CROWN-seq and at least one another method
2	147844517	+	TRUE	TRUE	FALSE	FALSE	TRUE	Found by CROWN-seq and at least one another method
2	148020737	-	TRUE	TRUE	FALSE	TRUE	FALSE	Found by CROWN-seq and at least one another method
2	149587720	-	TRUE	TRUE	TRUE	FALSE	FALSE	Found by CROWN-seq and at least one another method
2	150487665	-	TRUE	TRUE	FALSE	TRUE	TRUE	Found by CROWN-seq and at least one another method
2	150487668	-	TRUE	TRUE	FALSE	FALSE	TRUE	Found by CROWN-seq and at least one another method
2	151828469	-	FALSE	TRUE	FALSE	TRUE	FALSE	Low coverage
2	151828474	-	FALSE	TRUE	TRUE	FALSE	FALSE	Low coverage
2	152335170	+	TRUE	TRUE	TRUE	FALSE	FALSE	Found by CROWN-seq and at least one another method
2	152717409	-	TRUE	TRUE	FALSE	TRUE	FALSE	Found by CROWN-seq and at least one another method
2	152717427	-	TRUE	TRUE	FALSE	TRUE	FALSE	Found by CROWN-seq and at least one another method
2	152717433	-	TRUE	TRUE	FALSE	TRUE	FALSE	Found by CROWN-seq and at least one another method
2	160493762	-	TRUE	TRUE	FALSE	FALSE	TRUE	Found by CROWN-seq and at least one another method
2	160493807	-	TRUE	TRUE	FALSE	FALSE	TRUE	Found by CROWN-seq and at least one another method
2	161160428	+	TRUE	TRUE	FALSE	TRUE	TRUE	Found by CROWN-seq and at least one another method
2	168456255	+	TRUE	TRUE	FALSE	FALSE	TRUE	Found by CROWN-seq and at least one another method
2	168890392	-	TRUE	TRUE	FALSE	FALSE	TRUE	Found by CROWN-seq and at least one another method
2	169573812	-	TRUE	TRUE	TRUE	FALSE	FALSE	Found by CROWN-seq and at least one another method
2	169749500	+	FALSE	FALSE	FALSE	TRUE	FALSE	Closest annotation >=100 nt
2	169798862	+	TRUE	TRUE	TRUE	FALSE	FALSE	Found by CROWN-seq and at least one another method
2	169798871	+	TRUE	TRUE	TRUE	FALSE	FALSE	Found by CROWN-seq and at least one another method
2	169827454	+	TRUE	TRUE	FALSE	TRUE	FALSE	Found by CROWN-seq and at least one another method
2	170929253	+	TRUE	TRUE	FALSE	TRUE	FALSE	Found by CROWN-seq and at least one another method
2	171894244	-	TRUE	TRUE	FALSE	TRUE	FALSE	Found by CROWN-seq and at least one another method
2	171922435	+	TRUE	TRUE	FALSE	TRUE	FALSE	Found by CROWN-seq and at least one another method
2	171922462	+	TRUE	TRUE	TRUE	TRUE	FALSE	Found by CROWN-seq and at least one another method
2	171922476	+	TRUE	TRUE	FALSE	TRUE	FALSE	Found by CROWN-seq and at least one another method
2	172102630	-	FALSE	FALSE	FALSE	FALSE	TRUE	Closest annotation >=100 nt
2	172102898	-	FALSE	TRUE	TRUE	FALSE	FALSE	Low coverage
2	172102900	-	TRUE	TRUE	FALSE	TRUE	FALSE	Found by CROWN-seq and at least one another method
2	173075849	+	TRUE	TRUE	FALSE	TRUE	FALSE	Found by CROWN-seq and at least one another method
2	173964406	-	FALSE	TRUE	FALSE	FALSE	TRUE	Low coverage
2	173965305	-	TRUE	TRUE	FALSE	FALSE	TRUE	Found by CROWN-seq and at least one another method
2	175181710	-	TRUE	TRUE	FALSE	TRUE	FALSE	Found by CROWN-seq and at least one another method
2	175181714	-	TRUE	TRUE	TRUE	TRUE	FALSE	Found by CROWN-seq and at least one another method
2	176269452	+	TRUE	TRUE	FALSE	TRUE	FALSE	Found by CROWN-seq and at least one another method
2	177212760	+	TRUE	TRUE	TRUE	FALSE	FALSE	Found by CROWN-seq and at least one another method
2	177264723	-	TRUE	TRUE	FALSE	FALSE	TRUE	Found by CROWN-seq and at least one another method
2	177392691	-	TRUE	TRUE	FALSE	FALSE	TRUE	Found by CROWN-seq and at least one another method
2	177392776	+	TRUE	TRUE	TRUE	FALSE	FALSE	Found by CROWN-seq and at least one another method
2	178451153	-	FALSE	TRUE	FALSE	TRUE	FALSE	Low coverage
2	178478553	-	TRUE	TRUE	FALSE	FALSE	TRUE	Found by CROWN-seq and at least one another method
2	185547006	-	FALSE	FALSE	FALSE	TRUE	FALSE	Closest annotation >=100 nt
2	187554435	-	TRUE	TRUE	FALSE	FALSE	TRUE	Found by CROWN-seq and at least one another method
2	189441467	+	TRUE	TRUE	TRUE	FALSE	FALSE	Found by CROWN-seq and at least one another method
2	189441474	+	TRUE	TRUE	TRUE	TRUE	FALSE	Found by CROWN-seq and at least one another method
2	189784316	-	TRUE	TRUE	FALSE	TRUE	FALSE	Found by CROWN-seq and at least one another method
2	189784331	-	TRUE	TRUE	FALSE	TRUE	FALSE	Found by CROWN-seq and at least one another method
2	189784340	-	TRUE	TRUE	FALSE	TRUE	FALSE	Found by CROWN-seq and at least one another method
2	190880821	+	TRUE	TRUE	TRUE	TRUE	TRUE	Found by CROWN-seq and at least one another method
2	196593554	-	TRUE	TRUE	FALSE	FALSE	TRUE	Found by CROWN-seq and at least one another method
2	197435028	-	TRUE	TRUE	TRUE	FALSE	FALSE	Found by CROWN-seq and at least one another method
2	197499866	-	TRUE	TRUE	FALSE	TRUE	FALSE	Found by CROWN-seq and at least one another method
2	197499881	-	TRUE	TRUE	FALSE	TRUE	FALSE	Found by CROWN-seq and at least one another method
2	197499896	-	TRUE	TRUE	TRUE	FALSE	FALSE	Found by CROWN-seq and at least one another method
2	197500358	+	TRUE	TRUE	FALSE	TRUE	FALSE	Found by CROWN-seq and at least one another method
2	197500404	+	TRUE	TRUE	FALSE	FALSE	TRUE	Found by CROWN-seq and at least one another method
2	197500409	+	TRUE	TRUE	FALSE	TRUE	FALSE	Found by CROWN-seq and at least one another method
2	197500429	+	TRUE	TRUE	FALSE	FALSE	TRUE	Found by CROWN-seq and at least one another method
2	197516066	+	TRUE	TRUE	FALSE	TRUE	FALSE	Found by CROWN-seq and at least one another method
2	197516084	+	TRUE	TRUE	FALSE	TRUE	FALSE	Found by CROWN-seq and at least one another method
2	197705369	+	TRUE	TRUE	FALSE	TRUE	TRUE	Found by CROWN-seq and at least one another method
2	199925366	+	FALSE	FALSE	FALSE	TRUE	FALSE	Closest annotation >=100 nt
2	199955500	-	TRUE	TRUE	FALSE	FALSE	TRUE	Found by CROWN-seq and at least one another method
2	199955793	+	TRUE	TRUE	TRUE	FALSE	FALSE	Found by CROWN-seq and at least one another method
2	200811910	+	TRUE	TRUE	TRUE	FALSE	FALSE	Found by CROWN-seq and at least one another method
2	200811922	+	TRUE	TRUE	FALSE	TRUE	FALSE	Found by CROWN-seq and at least one another method
2	200864658	-	TRUE	TRUE	TRUE	FALSE	FALSE	Found by CROWN-seq and at least one another method
2	200889373	+	TRUE	TRUE	FALSE	TRUE	FALSE	Found by CROWN-seq and at least one another method
2	200963660	-	TRUE	TRUE	TRUE	TRUE	FALSE	Found by CROWN-seq and at least one another method
2	201183112	+	TRUE	TRUE	FALSE	FALSE	TRUE	Found by CROWN-seq and at least one another method
2	201183127	+	TRUE	TRUE	FALSE	FALSE	TRUE	Found by CROWN-seq and at least one another method
2	201642670	-	TRUE	TRUE	FALSE	TRUE	FALSE	Found by CROWN-seq and at least one another method
2	202238564	-	TRUE	TRUE	FALSE	TRUE	FALSE	Found by CROWN-seq and at least one another method
2	202238574	-	TRUE	TRUE	TRUE	FALSE	FALSE	Found by CROWN-seq and at least one another method
2	202238594	-	TRUE	TRUE	FALSE	TRUE	FALSE	Found by CROWN-seq and at least one another method
2	202265736	+	TRUE	TRUE	FALSE	TRUE	FALSE	Found by CROWN-seq and at least one another method
2	202265771	+	TRUE	TRUE	TRUE	TRUE	FALSE	Found by CROWN-seq and at least one another method
2	202911646	-	TRUE	TRUE	FALSE	TRUE	FALSE	Found by CROWN-seq and at least one another method
2	203439468	-	FALSE	FALSE	FALSE	TRUE	FALSE	Closest annotation >=100 nt
2	206159425	-	TRUE	TRUE	TRUE	FALSE	FALSE	Found by CROWN-seq and at least one another method
2	206159438	-	TRUE	TRUE	FALSE	TRUE	FALSE	Found by CROWN-seq and at least one another method
2	206159588	+	TRUE	TRUE	FALSE	TRUE	FALSE	Found by CROWN-seq and at least one another method
2	206159600	+	TRUE	TRUE	FALSE	FALSE	TRUE	Found by CROWN-seq and at least one another method
2	206159609	+	TRUE	TRUE	FALSE	TRUE	FALSE	Found by CROWN-seq and at least one another method
2	206159635	+	TRUE	TRUE	TRUE	FALSE	FALSE	Found by CROWN-seq and at least one another method
2	207529962	+	TRUE	TRUE	FALSE	TRUE	FALSE	Found by CROWN-seq and at least one another method
2	208001508	-	FALSE	FALSE	FALSE	TRUE	FALSE	Closest annotation >=100 nt
2	210477690	+	TRUE	TRUE	FALSE	FALSE	TRUE	Found by CROWN-seq and at least one another method
2	211257655	+	FALSE	FALSE	FALSE	TRUE	FALSE	Closest annotation >=100 nt
2	214697600	+	FALSE	TRUE	TRUE	FALSE	FALSE	Low coverage
2	215312062	+	TRUE	TRUE	TRUE	FALSE	FALSE	Found by CROWN-seq and at least one another method
2	215312081	+	TRUE	TRUE	FALSE	TRUE	FALSE	Found by CROWN-seq and at least one another method
2	215312089	+	TRUE	TRUE	FALSE	TRUE	FALSE	Found by CROWN-seq and at least one another method
2	216109351	+	TRUE	TRUE	TRUE	FALSE	FALSE	Found by CROWN-seq and at least one another method
2	216412484	+	TRUE	TRUE	FALSE	TRUE	FALSE	Found by CROWN-seq and at least one another method
2	216498797	+	TRUE	TRUE	FALSE	TRUE	FALSE	Found by CROWN-seq and at least one another method
2	216498815	+	TRUE	TRUE	FALSE	TRUE	FALSE	Found by CROWN-seq and at least one another method
2	216633421	+	TRUE	TRUE	TRUE	FALSE	FALSE	Found by CROWN-seq and at least one another method
2	218217159	+	TRUE	TRUE	TRUE	TRUE	FALSE	Found by CROWN-seq and at least one another method
2	218270161	-	TRUE	TRUE	FALSE	TRUE	FALSE	Found by CROWN-seq and at least one another method
2	218270170	-	TRUE	TRUE	FALSE	TRUE	FALSE	Found by CROWN-seq and at least one another method
2	218399895	+	TRUE	TRUE	TRUE	FALSE	FALSE	Found by CROWN-seq and at least one another method
2	218633465	-	FALSE	FALSE	FALSE	TRUE	FALSE	Closest annotation >=100 nt
2	218659545	-	TRUE	TRUE	FALSE	FALSE	TRUE	Found by CROWN-seq and at least one another method
2	218659683	+	TRUE	TRUE	FALSE	FALSE	TRUE	Found by CROWN-seq and at least one another method
2	218659714	+	TRUE	TRUE	TRUE	FALSE	FALSE	Found by CROWN-seq and at least one another method
2	218659720	+	TRUE	TRUE	FALSE	TRUE	FALSE	Found by CROWN-seq and at least one another method
2	218659730	+	TRUE	TRUE	FALSE	TRUE	FALSE	Found by CROWN-seq and at least one another method
2	219178227	+	TRUE	TRUE	FALSE	TRUE	FALSE	Found by CROWN-seq and at least one another method
2	219229559	-	TRUE	TRUE	FALSE	TRUE	FALSE	Found by CROWN-seq and at least one another method
2	219229629	-	FALSE	TRUE	FALSE	TRUE	FALSE	Low coverage
2	219498891	+	TRUE	TRUE	FALSE	TRUE	FALSE	Found by CROWN-seq and at least one another method
2	219498914	+	TRUE	TRUE	FALSE	TRUE	FALSE	Found by CROWN-seq and at least one another method
2	219544031	+	TRUE	TRUE	FALSE	TRUE	FALSE	Found by CROWN-seq and at least one another method
2	219597871	+	TRUE	TRUE	TRUE	FALSE	FALSE	Found by CROWN-seq and at least one another method
2	222298996	-	TRUE	TRUE	FALSE	FALSE	TRUE	Found by CROWN-seq and at least one another method
2	222656078	-	TRUE	TRUE	TRUE	FALSE	FALSE	Found by CROWN-seq and at least one another method
2	223837582	-	TRUE	TRUE	TRUE	FALSE	FALSE	Found by CROWN-seq and at least one another method
2	227472162	+	TRUE	TRUE	FALSE	TRUE	FALSE	Found by CROWN-seq and at least one another method
2	227472165	+	TRUE	TRUE	TRUE	FALSE	FALSE	Found by CROWN-seq and at least one another method
2	230068924	-	TRUE	TRUE	FALSE	FALSE	TRUE	Found by CROWN-seq and at least one another method
2	230712919	+	TRUE	TRUE	FALSE	FALSE	TRUE	Found by CROWN-seq and at least one another method
2	231464484	-	TRUE	TRUE	TRUE	FALSE	FALSE	Found by CROWN-seq and at least one another method
2	231708530	+	TRUE	TRUE	TRUE	TRUE	TRUE	Found by CROWN-seq and at least one another method
2	231711345	+	FALSE	FALSE	FALSE	FALSE	TRUE	Closest annotation >=100 nt
2	231781279	-	TRUE	TRUE	FALSE	FALSE	TRUE	Found by CROWN-seq and at least one another method
2	231781282	-	TRUE	TRUE	TRUE	FALSE	FALSE	Found by CROWN-seq and at least one another method
2	231781299	-	FALSE	FALSE	FALSE	FALSE	TRUE	Closest annotation <100 nt
2	231786436	+	TRUE	TRUE	TRUE	FALSE	FALSE	Found by CROWN-seq and at least one another method
2	231786447	+	TRUE	TRUE	FALSE	TRUE	FALSE	Found by CROWN-seq and at least one another method
2	231786461	+	TRUE	TRUE	FALSE	TRUE	FALSE	Found by CROWN-seq and at least one another method
2	231926396	-	TRUE	TRUE	FALSE	TRUE	FALSE	Found by CROWN-seq and at least one another method
2	231961713	+	TRUE	TRUE	FALSE	TRUE	FALSE	Found by CROWN-seq and at least one another method
2	232550659	+	TRUE	TRUE	FALSE	FALSE	TRUE	Found by CROWN-seq and at least one another method
2	232550689	+	TRUE	TRUE	TRUE	TRUE	TRUE	Found by CROWN-seq and at least one another method
2	232550701	+	TRUE	TRUE	FALSE	TRUE	TRUE	Found by CROWN-seq and at least one another method
2	232633578	+	TRUE	TRUE	FALSE	TRUE	FALSE	Found by CROWN-seq and at least one another method
2	232697331	+	TRUE	TRUE	TRUE	TRUE	FALSE	Found by CROWN-seq and at least one another method
2	233854535	-	TRUE	TRUE	FALSE	TRUE	FALSE	Found by CROWN-seq and at least one another method
2	236124446	+	FALSE	FALSE	FALSE	TRUE	FALSE	Closest annotation >=100 nt
2	237085908	+	TRUE	TRUE	FALSE	TRUE	FALSE	Found by CROWN-seq and at least one another method
2	237085914	+	TRUE	TRUE	TRUE	FALSE	FALSE	Found by CROWN-seq and at least one another method
2	237859623	+	TRUE	TRUE	FALSE	TRUE	FALSE	Found by CROWN-seq and at least one another method
2	237911846	+	FALSE	FALSE	FALSE	TRUE	FALSE	Closest annotation >=100 nt
2	237911870	+	FALSE	FALSE	FALSE	TRUE	FALSE	Closest annotation >=100 nt
2	238848319	+	FALSE	TRUE	FALSE	FALSE	TRUE	Low coverage
2	240136303	-	TRUE	TRUE	TRUE	FALSE	FALSE	Found by CROWN-seq and at least one another method
2	240524176	-	FALSE	FALSE	FALSE	TRUE	FALSE	Closest annotation >=100 nt
2	240560845	+	TRUE	TRUE	FALSE	TRUE	FALSE	Found by CROWN-seq and at least one another method
2	240820219	-	TRUE	TRUE	TRUE	FALSE	FALSE	Found by CROWN-seq and at least one another method
2	241102287	-	TRUE	TRUE	FALSE	TRUE	FALSE	Found by CROWN-seq and at least one another method
2	241150467	+	TRUE	TRUE	FALSE	FALSE	TRUE	Found by CROWN-seq and at least one another method
2	241150469	+	TRUE	TRUE	TRUE	FALSE	FALSE	Found by CROWN-seq and at least one another method
2	241150476	+	TRUE	TRUE	FALSE	TRUE	FALSE	Found by CROWN-seq and at least one another method
2	241150484	+	TRUE	TRUE	FALSE	FALSE	TRUE	Found by CROWN-seq and at least one another method
2	241150489	+	TRUE	TRUE	FALSE	TRUE	FALSE	Found by CROWN-seq and at least one another method
2	241150494	+	FALSE	TRUE	FALSE	FALSE	TRUE	Low coverage
2	241315270	+	TRUE	TRUE	FALSE	FALSE	TRUE	Found by CROWN-seq and at least one another method
2	241315355	+	TRUE	TRUE	FALSE	FALSE	TRUE	Found by CROWN-seq and at least one another method
2	241315447	+	TRUE	TRUE	FALSE	FALSE	TRUE	Found by CROWN-seq and at least one another method
2	241315715	-	TRUE	TRUE	TRUE	FALSE	FALSE	Found by CROWN-seq and at least one another method
2	241315925	+	TRUE	TRUE	FALSE	TRUE	FALSE	Found by CROWN-seq and at least one another method
2	241356285	+	TRUE	TRUE	FALSE	TRUE	FALSE	Found by CROWN-seq and at least one another method
2	241489918	-	FALSE	FALSE	FALSE	TRUE	FALSE	Closest annotation >=100 nt
2	241637693	+	TRUE	TRUE	FALSE	TRUE	FALSE	Found by CROWN-seq and at least one another method
2	241686783	-	TRUE	TRUE	FALSE	TRUE	FALSE	Found by CROWN-seq and at least one another method
2	241686787	-	TRUE	TRUE	FALSE	TRUE	FALSE	Found by CROWN-seq and at least one another method
2	241686804	-	TRUE	TRUE	TRUE	TRUE	FALSE	Found by CROWN-seq and at least one another method
3	3179689	-	TRUE	TRUE	TRUE	FALSE	FALSE	Found by CROWN-seq and at least one another method
3	3179691	-	TRUE	TRUE	FALSE	FALSE	TRUE	Found by CROWN-seq and at least one another method
3	4979437	+	TRUE	TRUE	FALSE	FALSE	TRUE	Found by CROWN-seq and at least one another method
3	4979459	+	TRUE	TRUE	FALSE	TRUE	FALSE	Found by CROWN-seq and at least one another method
3	4979463	+	TRUE	TRUE	FALSE	TRUE	FALSE	Found by CROWN-seq and at least one another method
3	5122292	+	TRUE	TRUE	TRUE	FALSE	FALSE	Found by CROWN-seq and at least one another method
3	8501825	+	TRUE	TRUE	FALSE	FALSE	TRUE	Found by CROWN-seq and at least one another method
3	9363070	+	TRUE	TRUE	FALSE	TRUE	FALSE	Found by CROWN-seq and at least one another method
3	9397439	-	FALSE	TRUE	FALSE	TRUE	TRUE	Low coverage
3	9792495	+	TRUE	TRUE	FALSE	FALSE	TRUE	Found by CROWN-seq and at least one another method
3	9792701	-	TRUE	TRUE	FALSE	TRUE	FALSE	Found by CROWN-seq and at least one another method
3	9793082	+	TRUE	TRUE	TRUE	FALSE	FALSE	Found by CROWN-seq and at least one another method
3	9793108	+	TRUE	TRUE	FALSE	TRUE	FALSE	Found by CROWN-seq and at least one another method
3	9844016	-	TRUE	TRUE	TRUE	TRUE	FALSE	Found by CROWN-seq and at least one another method
3	9890616	+	TRUE	TRUE	TRUE	TRUE	FALSE	Found by CROWN-seq and at least one another method
3	9890646	+	TRUE	TRUE	FALSE	TRUE	FALSE	Found by CROWN-seq and at least one another method
3	9933834	+	TRUE	TRUE	FALSE	TRUE	FALSE	Found by CROWN-seq and at least one another method
3	9986829	-	TRUE	TRUE	FALSE	TRUE	FALSE	Found by CROWN-seq and at least one another method
3	9986840	-	TRUE	TRUE	FALSE	FALSE	TRUE	Found by CROWN-seq and at least one another method
3	9986879	+	FALSE	TRUE	FALSE	FALSE	TRUE	Low coverage
3	9986888	+	FALSE	TRUE	FALSE	TRUE	TRUE	Low coverage
3	10012660	+	FALSE	FALSE	FALSE	TRUE	FALSE	Closest annotation >=100 nt
3	10115677	+	TRUE	TRUE	FALSE	TRUE	FALSE	Found by CROWN-seq and at least one another method
3	10141780	+	TRUE	TRUE	FALSE	TRUE	FALSE	Found by CROWN-seq and at least one another method
3	10248497	+	TRUE	TRUE	FALSE	TRUE	FALSE	Found by CROWN-seq and at least one another method
3	10321071	-	TRUE	TRUE	FALSE	TRUE	FALSE	Found by CROWN-seq and at least one another method
3	10321093	-	TRUE	TRUE	FALSE	TRUE	FALSE	Found by CROWN-seq and at least one another method
3	10321120	-	TRUE	TRUE	FALSE	TRUE	FALSE	Found by CROWN-seq and at least one another method
3	11643915	-	TRUE	TRUE	FALSE	FALSE	TRUE	Found by CROWN-seq and at least one another method
3	11846845	-	TRUE	TRUE	FALSE	FALSE	TRUE	Found by CROWN-seq and at least one another method
3	12484491	+	TRUE	TRUE	FALSE	TRUE	FALSE	Found by CROWN-seq and at least one another method
3	12557087	+	TRUE	TRUE	FALSE	TRUE	FALSE	Found by CROWN-seq and at least one another method
3	12664116	-	TRUE	TRUE	TRUE	FALSE	FALSE	Found by CROWN-seq and at least one another method
3	12664117	-	TRUE	TRUE	FALSE	TRUE	FALSE	Found by CROWN-seq and at least one another method
3	12796682	+	TRUE	TRUE	TRUE	FALSE	FALSE	Found by CROWN-seq and at least one another method
3	14124756	-	TRUE	TRUE	FALSE	TRUE	FALSE	Found by CROWN-seq and at least one another method
3	14125023	+	TRUE	TRUE	FALSE	TRUE	FALSE	Found by CROWN-seq and at least one another method
3	14125054	+	TRUE	TRUE	FALSE	TRUE	FALSE	Found by CROWN-seq and at least one another method
3	14178601	-	TRUE	TRUE	FALSE	TRUE	FALSE	Found by CROWN-seq and at least one another method
3	14178619	-	TRUE	TRUE	FALSE	TRUE	FALSE	Found by CROWN-seq and at least one another method
3	14402621	+	TRUE	TRUE	FALSE	FALSE	TRUE	Found by CROWN-seq and at least one another method
3	14651773	+	TRUE	TRUE	FALSE	TRUE	FALSE	Found by CROWN-seq and at least one another method
3	14947587	+	TRUE	TRUE	FALSE	FALSE	TRUE	Found by CROWN-seq and at least one another method
3	14948365	-	FALSE	TRUE	FALSE	TRUE	FALSE	Low coverage
3	14948377	-	FALSE	TRUE	FALSE	TRUE	FALSE	Low coverage
3	15045681	-	FALSE	FALSE	FALSE	TRUE	FALSE	Closest annotation >=100 nt
3	15065310	-	TRUE	TRUE	TRUE	FALSE	FALSE	Found by CROWN-seq and at least one another method
3	15099136	-	TRUE	TRUE	FALSE	TRUE	FALSE	Found by CROWN-seq and at least one another method
3	15332591	-	TRUE	TRUE	TRUE	FALSE	FALSE	Found by CROWN-seq and at least one another method
3	15601569	-	TRUE	TRUE	TRUE	TRUE	FALSE	Found by CROWN-seq and at least one another method
3	19947372	+	TRUE	TRUE	FALSE	FALSE	TRUE	Found by CROWN-seq and at least one another method
3	19947379	+	TRUE	TRUE	FALSE	FALSE	TRUE	Found by CROWN-seq and at least one another method
3	20186211	-	TRUE	TRUE	TRUE	FALSE	FALSE	Found by CROWN-seq and at least one another method
3	23810454	+	TRUE	TRUE	FALSE	TRUE	FALSE	Found by CROWN-seq and at least one another method
3	23917120	+	TRUE	TRUE	FALSE	TRUE	FALSE	Found by CROWN-seq and at least one another method
3	23917127	+	TRUE	TRUE	TRUE	TRUE	FALSE	Found by CROWN-seq and at least one another method
3	23917138	+	TRUE	TRUE	FALSE	TRUE	FALSE	Found by CROWN-seq and at least one another method
3	32570858	-	TRUE	TRUE	TRUE	FALSE	FALSE	Found by CROWN-seq and at least one another method
3	33113983	+	TRUE	TRUE	TRUE	FALSE	FALSE	Found by CROWN-seq and at least one another method
3	33798630	+	TRUE	TRUE	TRUE	FALSE	FALSE	Found by CROWN-seq and at least one another method
3	33798642	+	TRUE	TRUE	FALSE	TRUE	FALSE	Found by CROWN-seq and at least one another method
3	37176321	-	TRUE	TRUE	FALSE	TRUE	FALSE	Found by CROWN-seq and at least one another method
3	37243271	+	TRUE	TRUE	TRUE	FALSE	TRUE	Found by CROWN-seq and at least one another method
3	38165571	+	TRUE	TRUE	FALSE	FALSE	TRUE	Found by CROWN-seq and at least one another method
3	39052016	+	TRUE	TRUE	FALSE	FALSE	TRUE	Found by CROWN-seq and at least one another method
3	39052019	+	TRUE	TRUE	TRUE	FALSE	FALSE	Found by CROWN-seq and at least one another method
3	39052023	+	TRUE	TRUE	FALSE	TRUE	FALSE	Found by CROWN-seq and at least one another method
3	39052055	+	FALSE	TRUE	FALSE	FALSE	TRUE	Low coverage
3	39107680	+	TRUE	TRUE	FALSE	FALSE	TRUE	Found by CROWN-seq and at least one another method
3	39383343	+	FALSE	TRUE	FALSE	FALSE	TRUE	Low coverage
3	39383356	+	TRUE	TRUE	FALSE	FALSE	TRUE	Found by CROWN-seq and at least one another method
3	39383370	+	TRUE	TRUE	FALSE	TRUE	FALSE	Found by CROWN-seq and at least one another method
3	40309682	+	TRUE	TRUE	FALSE	FALSE	TRUE	Found by CROWN-seq and at least one another method
3	40309684	+	TRUE	TRUE	FALSE	FALSE	TRUE	Found by CROWN-seq and at least one another method
3	40309698	+	TRUE	TRUE	FALSE	FALSE	TRUE	Found by CROWN-seq and at least one another method
3	40457310	+	TRUE	TRUE	TRUE	FALSE	FALSE	Found by CROWN-seq and at least one another method
3	41199456	+	TRUE	TRUE	TRUE	FALSE	FALSE	Found by CROWN-seq and at least one another method
3	41199477	+	TRUE	TRUE	TRUE	FALSE	FALSE	Found by CROWN-seq and at least one another method
3	42581967	-	TRUE	TRUE	FALSE	TRUE	FALSE	Found by CROWN-seq and at least one another method
3	42590886	+	TRUE	TRUE	FALSE	TRUE	FALSE	Found by CROWN-seq and at least one another method
3	42804480	-	TRUE	TRUE	FALSE	TRUE	FALSE	Found by CROWN-seq and at least one another method
3	42804495	-	TRUE	TRUE	TRUE	FALSE	FALSE	Found by CROWN-seq and at least one another method
3	44338129	+	TRUE	TRUE	FALSE	TRUE	FALSE	Found by CROWN-seq and at least one another method
3	44625037	+	TRUE	TRUE	TRUE	FALSE	FALSE	Found by CROWN-seq and at least one another method
3	44761672	-	TRUE	TRUE	FALSE	FALSE	TRUE	Found by CROWN-seq and at least one another method
3	44761790	+	TRUE	TRUE	TRUE	FALSE	FALSE	Found by CROWN-seq and at least one another method
3	44861893	+	FALSE	TRUE	FALSE	TRUE	FALSE	Low coverage
3	44861907	+	TRUE	TRUE	FALSE	TRUE	FALSE	Found by CROWN-seq and at least one another method
3	44976150	-	TRUE	TRUE	TRUE	FALSE	FALSE	Found by CROWN-seq and at least one another method
3	44976267	+	TRUE	TRUE	FALSE	TRUE	FALSE	Found by CROWN-seq and at least one another method
3	44976275	+	TRUE	TRUE	FALSE	TRUE	FALSE	Found by CROWN-seq and at least one another method
3	45388564	+	TRUE	TRUE	TRUE	FALSE	FALSE	Found by CROWN-seq and at least one another method
3	45593883	+	FALSE	TRUE	FALSE	TRUE	FALSE	Low coverage
3	45842087	-	TRUE	TRUE	TRUE	FALSE	FALSE	Found by CROWN-seq and at least one another method
3	45842119	-	TRUE	TRUE	FALSE	FALSE	TRUE	Found by CROWN-seq and at least one another method
3	45842150	-	TRUE	TRUE	FALSE	FALSE	TRUE	Found by CROWN-seq and at least one another method
3	46976735	-	TRUE	TRUE	FALSE	TRUE	FALSE	Found by CROWN-seq and at least one another method
3	46976757	-	TRUE	TRUE	TRUE	FALSE	TRUE	Found by CROWN-seq and at least one another method
3	46976759	-	TRUE	TRUE	FALSE	FALSE	TRUE	Found by CROWN-seq and at least one another method
3	46976767	-	FALSE	TRUE	FALSE	TRUE	FALSE	Low coverage
3	47282946	+	TRUE	TRUE	FALSE	TRUE	FALSE	Found by CROWN-seq and at least one another method
3	47381011	+	TRUE	TRUE	FALSE	TRUE	FALSE	Found by CROWN-seq and at least one another method
3	47475823	-	FALSE	TRUE	FALSE	TRUE	FALSE	Low coverage
3	47475937	-	FALSE	TRUE	FALSE	TRUE	FALSE	Low coverage
3	47513333	-	TRUE	TRUE	TRUE	FALSE	FALSE	Found by CROWN-seq and at least one another method
3	47513702	-	TRUE	TRUE	FALSE	TRUE	FALSE	Found by CROWN-seq and at least one another method
3	47513709	-	TRUE	TRUE	TRUE	TRUE	FALSE	Found by CROWN-seq and at least one another method
3	47781860	-	TRUE	TRUE	TRUE	FALSE	FALSE	Found by CROWN-seq and at least one another method
3	47781893	-	TRUE	TRUE	FALSE	TRUE	FALSE	Found by CROWN-seq and at least one another method
3	47825013	+	TRUE	TRUE	TRUE	FALSE	FALSE	Found by CROWN-seq and at least one another method
3	47825015	+	TRUE	TRUE	FALSE	TRUE	FALSE	Found by CROWN-seq and at least one another method
3	48188376	-	TRUE	TRUE	FALSE	TRUE	FALSE	Found by CROWN-seq and at least one another method
3	48188406	-	TRUE	TRUE	FALSE	TRUE	FALSE	Found by CROWN-seq and at least one another method
3	48188417	-	TRUE	TRUE	FALSE	TRUE	FALSE	Found by CROWN-seq and at least one another method
3	48440069	-	TRUE	TRUE	FALSE	TRUE	FALSE	Found by CROWN-seq and at least one another method
3	48440102	-	TRUE	TRUE	FALSE	FALSE	TRUE	Found by CROWN-seq and at least one another method
3	48440119	-	TRUE	TRUE	FALSE	TRUE	TRUE	Found by CROWN-seq and at least one another method
3	48446737	+	TRUE	TRUE	FALSE	TRUE	TRUE	Found by CROWN-seq and at least one another method
3	48446779	+	TRUE	TRUE	FALSE	TRUE	FALSE	Found by CROWN-seq and at least one another method
3	48609644	-	TRUE	TRUE	FALSE	TRUE	FALSE	Found by CROWN-seq and at least one another method
3	48609664	-	TRUE	TRUE	FALSE	TRUE	FALSE	Found by CROWN-seq and at least one another method
3	48640199	-	FALSE	FALSE	FALSE	TRUE	FALSE	Closest annotation >=100 nt
3	48658896	-	FALSE	FALSE	FALSE	TRUE	FALSE	Closest annotation >=100 nt
3	48659324	-	FALSE	FALSE	FALSE	TRUE	FALSE	Closest annotation >=100 nt
3	48659942	-	FALSE	FALSE	FALSE	TRUE	FALSE	Closest annotation >=100 nt
3	48660402	-	FALSE	FALSE	FALSE	TRUE	FALSE	Closest annotation >=100 nt
3	48681154	-	FALSE	FALSE	FALSE	TRUE	FALSE	Closest annotation >=100 nt
3	48685905	-	TRUE	TRUE	FALSE	TRUE	FALSE	Found by CROWN-seq and at least one another method
3	48717193	-	TRUE	TRUE	FALSE	TRUE	FALSE	Found by CROWN-seq and at least one another method
3	48717215	-	TRUE	TRUE	TRUE	TRUE	TRUE	Found by CROWN-seq and at least one another method
3	48847741	-	FALSE	TRUE	FALSE	FALSE	TRUE	Low coverage
3	48847804	-	TRUE	TRUE	FALSE	FALSE	TRUE	Found by CROWN-seq and at least one another method
3	48847874	-	TRUE	TRUE	FALSE	TRUE	FALSE	Found by CROWN-seq and at least one another method
3	48918817	-	FALSE	TRUE	FALSE	FALSE	TRUE	Low coverage
3	48918844	+	TRUE	TRUE	FALSE	TRUE	FALSE	Found by CROWN-seq and at least one another method
3	48918867	+	TRUE	TRUE	FALSE	TRUE	FALSE	Found by CROWN-seq and at least one another method
3	49007387	+	TRUE	TRUE	FALSE	TRUE	FALSE	Found by CROWN-seq and at least one another method
3	49007399	+	TRUE	TRUE	FALSE	TRUE	FALSE	Found by CROWN-seq and at least one another method
3	49007423	+	TRUE	TRUE	FALSE	TRUE	FALSE	Found by CROWN-seq and at least one another method
3	49018567	-	TRUE	TRUE	FALSE	TRUE	FALSE	Found by CROWN-seq and at least one another method
3	49018580	-	TRUE	TRUE	FALSE	TRUE	FALSE	Found by CROWN-seq and at least one another method
3	49022083	+	TRUE	TRUE	FALSE	TRUE	FALSE	Found by CROWN-seq and at least one another method
3	49022094	+	TRUE	TRUE	FALSE	TRUE	FALSE	Found by CROWN-seq and at least one another method
3	49022106	+	TRUE	TRUE	FALSE	TRUE	FALSE	Found by CROWN-seq and at least one another method
3	49029426	-	TRUE	TRUE	TRUE	FALSE	FALSE	Found by CROWN-seq and at least one another method
3	49094049	-	TRUE	TRUE	FALSE	TRUE	FALSE	Found by CROWN-seq and at least one another method
3	49094071	-	TRUE	TRUE	TRUE	TRUE	TRUE	Found by CROWN-seq and at least one another method
3	49166323	-	TRUE	TRUE	FALSE	TRUE	FALSE	Found by CROWN-seq and at least one another method
3	49358353	-	TRUE	TRUE	TRUE	FALSE	FALSE	Found by CROWN-seq and at least one another method
3	49674367	+	TRUE	TRUE	TRUE	FALSE	FALSE	Found by CROWN-seq and at least one another method
3	49723950	-	TRUE	TRUE	FALSE	TRUE	FALSE	Found by CROWN-seq and at least one another method
3	49786542	-	TRUE	TRUE	FALSE	TRUE	FALSE	Found by CROWN-seq and at least one another method
3	49856564	-	TRUE	TRUE	FALSE	TRUE	FALSE	Found by CROWN-seq and at least one another method
3	49929811	-	TRUE	TRUE	TRUE	FALSE	FALSE	Found by CROWN-seq and at least one another method
3	50088919	+	TRUE	TRUE	TRUE	TRUE	FALSE	Found by CROWN-seq and at least one another method
3	50088954	+	TRUE	TRUE	TRUE	TRUE	FALSE	Found by CROWN-seq and at least one another method
3	50205273	+	FALSE	TRUE	FALSE	TRUE	FALSE	Low coverage
3	50236204	+	TRUE	TRUE	TRUE	TRUE	TRUE	Found by CROWN-seq and at least one another method
3	50288574	-	FALSE	FALSE	FALSE	TRUE	FALSE	Closest annotation <100 nt
3	50292429	-	TRUE	TRUE	FALSE	TRUE	FALSE	Found by CROWN-seq and at least one another method
3	50299372	-	TRUE	TRUE	FALSE	TRUE	FALSE	Found by CROWN-seq and at least one another method
3	50328192	-	TRUE	TRUE	FALSE	TRUE	FALSE	Found by CROWN-seq and at least one another method
3	50328223	-	TRUE	TRUE	FALSE	TRUE	FALSE	Found by CROWN-seq and at least one another method
3	50337356	-	FALSE	TRUE	FALSE	TRUE	FALSE	Low coverage
3	50350775	-	TRUE	TRUE	TRUE	TRUE	FALSE	Found by CROWN-seq and at least one another method
3	50350781	-	TRUE	TRUE	FALSE	TRUE	FALSE	Found by CROWN-seq and at least one another method
3	50350788	-	TRUE	TRUE	TRUE	TRUE	FALSE	Found by CROWN-seq and at least one another method
3	50359488	-	TRUE	TRUE	FALSE	TRUE	FALSE	Found by CROWN-seq and at least one another method
3	50359521	-	TRUE	TRUE	FALSE	TRUE	FALSE	Found by CROWN-seq and at least one another method
3	50359524	-	TRUE	TRUE	FALSE	TRUE	FALSE	Found by CROWN-seq and at least one another method
3	50617131	+	TRUE	TRUE	FALSE	TRUE	FALSE	Found by CROWN-seq and at least one another method
3	50617145	+	TRUE	TRUE	FALSE	TRUE	FALSE	Found by CROWN-seq and at least one another method
3	50617151	+	TRUE	TRUE	TRUE	TRUE	FALSE	Found by CROWN-seq and at least one another method
3	51385291	+	TRUE	TRUE	TRUE	TRUE	FALSE	Found by CROWN-seq and at least one another method
3	51941885	-	TRUE	TRUE	TRUE	FALSE	FALSE	Found by CROWN-seq and at least one another method
3	51941941	-	TRUE	TRUE	FALSE	TRUE	FALSE	Found by CROWN-seq and at least one another method
3	51974021	-	TRUE	TRUE	FALSE	FALSE	TRUE	Found by CROWN-seq and at least one another method
3	51974041	-	TRUE	TRUE	FALSE	FALSE	TRUE	Found by CROWN-seq and at least one another method
3	51975066	+	TRUE	TRUE	FALSE	TRUE	FALSE	Found by CROWN-seq and at least one another method
3	51983504	+	TRUE	TRUE	FALSE	TRUE	FALSE	Found by CROWN-seq and at least one another method
3	51983535	+	TRUE	TRUE	FALSE	TRUE	FALSE	Found by CROWN-seq and at least one another method
3	51995951	-	TRUE	TRUE	TRUE	FALSE	FALSE	Found by CROWN-seq and at least one another method
3	52154405	-	TRUE	TRUE	FALSE	TRUE	TRUE	Found by CROWN-seq and at least one another method
3	52154412	-	TRUE	TRUE	FALSE	TRUE	FALSE	Found by CROWN-seq and at least one another method
3	52198121	+	TRUE	TRUE	FALSE	TRUE	FALSE	Found by CROWN-seq and at least one another method
3	52198132	+	TRUE	TRUE	TRUE	FALSE	FALSE	Found by CROWN-seq and at least one another method
3	52198160	+	TRUE	TRUE	FALSE	TRUE	FALSE	Found by CROWN-seq and at least one another method
3	52239146	-	TRUE	TRUE	TRUE	TRUE	FALSE	Found by CROWN-seq and at least one another method
3	52278646	-	TRUE	TRUE	FALSE	TRUE	FALSE	Found by CROWN-seq and at least one another method
3	52455604	+	TRUE	TRUE	FALSE	TRUE	FALSE	Found by CROWN-seq and at least one another method
3	52533857	-	TRUE	TRUE	TRUE	FALSE	FALSE	Found by CROWN-seq and at least one another method
3	52536605	+	TRUE	TRUE	TRUE	TRUE	FALSE	Found by CROWN-seq and at least one another method
3	52686032	+	TRUE	TRUE	TRUE	TRUE	TRUE	Found by CROWN-seq and at least one another method
3	52706112	+	TRUE	TRUE	TRUE	TRUE	FALSE	Found by CROWN-seq and at least one another method
3	52770938	-	TRUE	TRUE	TRUE	FALSE	FALSE	Found by CROWN-seq and at least one another method
3	52770940	-	TRUE	TRUE	FALSE	TRUE	FALSE	Found by CROWN-seq and at least one another method
3	53046073	-	TRUE	TRUE	TRUE	FALSE	TRUE	Found by CROWN-seq and at least one another method
3	53130464	-	TRUE	TRUE	TRUE	FALSE	FALSE	Found by CROWN-seq and at least one another method
3	53197284	+	FALSE	TRUE	FALSE	TRUE	FALSE	Low coverage
3	53347524	-	TRUE	TRUE	FALSE	TRUE	FALSE	Found by CROWN-seq and at least one another method
3	53347543	-	TRUE	TRUE	TRUE	TRUE	FALSE	Found by CROWN-seq and at least one another method
3	53846568	+	TRUE	TRUE	FALSE	TRUE	FALSE	Found by CROWN-seq and at least one another method
3	53882152	-	TRUE	TRUE	FALSE	TRUE	TRUE	Found by CROWN-seq and at least one another method
3	53891826	-	TRUE	TRUE	FALSE	TRUE	FALSE	Found by CROWN-seq and at least one another method
3	53891855	-	TRUE	TRUE	TRUE	TRUE	FALSE	Found by CROWN-seq and at least one another method
3	57597344	-	TRUE	TRUE	TRUE	TRUE	FALSE	Found by CROWN-seq and at least one another method
3	57597378	-	TRUE	TRUE	FALSE	TRUE	FALSE	Found by CROWN-seq and at least one another method
3	57597384	-	TRUE	TRUE	FALSE	TRUE	FALSE	Found by CROWN-seq and at least one another method
3	58306262	+	TRUE	TRUE	FALSE	TRUE	FALSE	Found by CROWN-seq and at least one another method
3	58433818	-	TRUE	TRUE	FALSE	TRUE	FALSE	Found by CROWN-seq and at least one another method
3	58433827	-	TRUE	TRUE	TRUE	FALSE	FALSE	Found by CROWN-seq and at least one another method
3	58433832	-	TRUE	TRUE	FALSE	TRUE	FALSE	Found by CROWN-seq and at least one another method
3	61561569	+	TRUE	TRUE	FALSE	FALSE	TRUE	Found by CROWN-seq and at least one another method
3	61561571	+	TRUE	TRUE	FALSE	FALSE	TRUE	Found by CROWN-seq and at least one another method
3	62319043	+	TRUE	TRUE	FALSE	TRUE	FALSE	Found by CROWN-seq and at least one another method
3	64023501	-	TRUE	TRUE	FALSE	TRUE	FALSE	Found by CROWN-seq and at least one another method
3	66221001	+	TRUE	TRUE	FALSE	TRUE	FALSE	Found by CROWN-seq and at least one another method
3	67654615	-	TRUE	TRUE	TRUE	FALSE	FALSE	Found by CROWN-seq and at least one another method
3	69080353	-	FALSE	TRUE	FALSE	TRUE	FALSE	Low coverage
3	69080356	-	TRUE	TRUE	FALSE	TRUE	FALSE	Found by CROWN-seq and at least one another method
3	69080359	-	TRUE	TRUE	FALSE	TRUE	FALSE	Found by CROWN-seq and at least one another method
3	69080369	-	TRUE	TRUE	FALSE	FALSE	TRUE	Found by CROWN-seq and at least one another method
3	69085014	+	TRUE	TRUE	FALSE	FALSE	TRUE	Found by CROWN-seq and at least one another method
3	69085036	+	TRUE	TRUE	FALSE	TRUE	FALSE	Found by CROWN-seq and at least one another method
3	71130610	-	FALSE	TRUE	FALSE	FALSE	TRUE	Low coverage
3	71753708	+	FALSE	TRUE	FALSE	TRUE	FALSE	Low coverage
3	75214510	+	FALSE	TRUE	TRUE	FALSE	FALSE	Low coverage
3	75422666	-	FALSE	FALSE	FALSE	TRUE	FALSE	Closest annotation >=100 nt
3	79019428	-	TRUE	TRUE	TRUE	TRUE	TRUE	Found by CROWN-seq and at least one another method
3	79019459	-	TRUE	TRUE	FALSE	TRUE	FALSE	Found by CROWN-seq and at least one another method
3	84958991	+	TRUE	TRUE	FALSE	FALSE	TRUE	Found by CROWN-seq and at least one another method
3	87227312	+	TRUE	TRUE	TRUE	TRUE	FALSE	Found by CROWN-seq and at least one another method
3	98522902	-	TRUE	TRUE	FALSE	TRUE	FALSE	Found by CROWN-seq and at least one another method
3	98522922	-	TRUE	TRUE	FALSE	FALSE	TRUE	Found by CROWN-seq and at least one another method
3	98522935	-	FALSE	TRUE	FALSE	FALSE	TRUE	Low coverage
3	99817862	+	TRUE	TRUE	FALSE	TRUE	FALSE	Found by CROWN-seq and at least one another method
3	99817887	+	TRUE	TRUE	FALSE	TRUE	FALSE	Found by CROWN-seq and at least one another method
3	100401402	-	FALSE	TRUE	TRUE	FALSE	FALSE	Low coverage
3	100401408	-	FALSE	TRUE	FALSE	FALSE	TRUE	Low coverage
3	101574194	+	FALSE	TRUE	TRUE	FALSE	TRUE	Low coverage
3	101677132	-	TRUE	TRUE	FALSE	FALSE	TRUE	Found by CROWN-seq and at least one another method
3	101677144	-	TRUE	TRUE	FALSE	FALSE	TRUE	Found by CROWN-seq and at least one another method
3	105366883	+	TRUE	TRUE	FALSE	FALSE	TRUE	Found by CROWN-seq and at least one another method
3	105366885	+	TRUE	TRUE	FALSE	FALSE	TRUE	Found by CROWN-seq and at least one another method
3	105366909	+	TRUE	TRUE	FALSE	TRUE	TRUE	Found by CROWN-seq and at least one another method
3	107522976	+	TRUE	TRUE	TRUE	FALSE	FALSE	Found by CROWN-seq and at least one another method
3	108091029	-	TRUE	TRUE	FALSE	TRUE	FALSE	Found by CROWN-seq and at least one another method
3	108222401	-	TRUE	TRUE	TRUE	FALSE	FALSE	Found by CROWN-seq and at least one another method
3	108222417	-	TRUE	TRUE	FALSE	TRUE	FALSE	Found by CROWN-seq and at least one another method
3	108589452	-	TRUE	TRUE	TRUE	FALSE	FALSE	Found by CROWN-seq and at least one another method
3	111979026	+	TRUE	TRUE	FALSE	TRUE	FALSE	Found by CROWN-seq and at least one another method
3	111979032	+	TRUE	TRUE	TRUE	FALSE	FALSE	Found by CROWN-seq and at least one another method
3	111979034	+	TRUE	TRUE	TRUE	TRUE	FALSE	Found by CROWN-seq and at least one another method
3	111979039	+	TRUE	TRUE	FALSE	TRUE	FALSE	Found by CROWN-seq and at least one another method
3	112086389	+	TRUE	TRUE	FALSE	TRUE	FALSE	Found by CROWN-seq and at least one another method
3	112561962	-	TRUE	TRUE	FALSE	TRUE	TRUE	Found by CROWN-seq and at least one another method
3	113211557	+	TRUE	TRUE	FALSE	FALSE	TRUE	Found by CROWN-seq and at least one another method
3	113746241	-	TRUE	TRUE	TRUE	FALSE	TRUE	Found by CROWN-seq and at least one another method
3	113747037	+	TRUE	TRUE	FALSE	TRUE	FALSE	Found by CROWN-seq and at least one another method
3	114056782	+	TRUE	TRUE	FALSE	TRUE	FALSE	Found by CROWN-seq and at least one another method
3	119463614	-	TRUE	TRUE	FALSE	TRUE	FALSE	Found by CROWN-seq and at least one another method
3	119498567	+	TRUE	TRUE	FALSE	TRUE	TRUE	Found by CROWN-seq and at least one another method
3	119677332	-	TRUE	TRUE	TRUE	FALSE	FALSE	Found by CROWN-seq and at least one another method
3	119677406	-	TRUE	TRUE	FALSE	TRUE	FALSE	Found by CROWN-seq and at least one another method
3	120094370	-	FALSE	FALSE	FALSE	FALSE	TRUE	Closest annotation <100 nt
3	120349354	-	TRUE	TRUE	TRUE	FALSE	FALSE	Found by CROWN-seq and at least one another method
3	120450996	-	TRUE	TRUE	TRUE	FALSE	FALSE	Found by CROWN-seq and at least one another method
3	120596306	+	TRUE	TRUE	TRUE	FALSE	FALSE	Found by CROWN-seq and at least one another method
3	120596332	+	TRUE	TRUE	FALSE	TRUE	FALSE	Found by CROWN-seq and at least one another method
3	120742516	-	TRUE	TRUE	FALSE	TRUE	TRUE	Found by CROWN-seq and at least one another method
3	120742732	+	TRUE	TRUE	TRUE	FALSE	FALSE	Found by CROWN-seq and at least one another method
3	122384182	+	TRUE	TRUE	FALSE	TRUE	FALSE	Found by CROWN-seq and at least one another method
3	122384200	+	TRUE	TRUE	TRUE	TRUE	FALSE	Found by CROWN-seq and at least one another method
3	122514937	-	TRUE	TRUE	TRUE	TRUE	FALSE	Found by CROWN-seq and at least one another method
3	123067025	+	TRUE	TRUE	FALSE	FALSE	TRUE	Found by CROWN-seq and at least one another method
3	123585053	-	TRUE	TRUE	FALSE	FALSE	TRUE	Found by CROWN-seq and at least one another method
3	124730457	+	TRUE	TRUE	FALSE	TRUE	FALSE	Found by CROWN-seq and at least one another method
3	125232885	-	FALSE	FALSE	FALSE	TRUE	FALSE	Closest annotation >=100 nt
3	125233747	-	FALSE	FALSE	FALSE	TRUE	FALSE	Closest annotation >=100 nt
3	125375311	-	FALSE	FALSE	FALSE	FALSE	TRUE	Closest annotation <100 nt
3	127598407	+	TRUE	TRUE	TRUE	FALSE	FALSE	Found by CROWN-seq and at least one another method
3	127598410	+	TRUE	TRUE	FALSE	TRUE	FALSE	Found by CROWN-seq and at least one another method
3	127598440	+	TRUE	TRUE	FALSE	TRUE	FALSE	Found by CROWN-seq and at least one another method
3	127629201	+	TRUE	TRUE	FALSE	TRUE	FALSE	Found by CROWN-seq and at least one another method
3	128123790	-	TRUE	TRUE	FALSE	TRUE	FALSE	Found by CROWN-seq and at least one another method
3	128123800	-	TRUE	TRUE	FALSE	TRUE	FALSE	Found by CROWN-seq and at least one another method
3	128123822	-	TRUE	TRUE	TRUE	FALSE	FALSE	Found by CROWN-seq and at least one another method
3	128153382	-	FALSE	TRUE	FALSE	FALSE	TRUE	Low coverage
3	128650816	-	TRUE	TRUE	TRUE	FALSE	FALSE	Found by CROWN-seq and at least one another method
3	128726136	+	TRUE	TRUE	FALSE	TRUE	FALSE	Found by CROWN-seq and at least one another method
3	128726183	+	TRUE	TRUE	FALSE	TRUE	FALSE	Found by CROWN-seq and at least one another method
3	128726193	+	TRUE	TRUE	TRUE	TRUE	FALSE	Found by CROWN-seq and at least one another method
3	128879620	+	TRUE	TRUE	TRUE	FALSE	FALSE	Found by CROWN-seq and at least one another method
3	128879623	+	TRUE	TRUE	FALSE	TRUE	FALSE	Found by CROWN-seq and at least one another method
3	129183852	-	TRUE	TRUE	FALSE	TRUE	FALSE	Found by CROWN-seq and at least one another method
3	129183892	-	TRUE	TRUE	FALSE	TRUE	FALSE	Found by CROWN-seq and at least one another method
3	129183908	-	TRUE	TRUE	TRUE	TRUE	FALSE	Found by CROWN-seq and at least one another method
3	129249632	+	TRUE	TRUE	TRUE	FALSE	FALSE	Found by CROWN-seq and at least one another method
3	129278845	+	FALSE	TRUE	TRUE	TRUE	TRUE	Low coverage
3	129316286	-	TRUE	TRUE	TRUE	TRUE	TRUE	Found by CROWN-seq and at least one another method
3	129399419	-	FALSE	TRUE	FALSE	FALSE	TRUE	Low coverage
3	129440284	+	FALSE	TRUE	FALSE	FALSE	TRUE	Low coverage
3	129556270	-	FALSE	FALSE	FALSE	TRUE	FALSE	Closest annotation >=100 nt
3	130746823	-	TRUE	TRUE	FALSE	FALSE	TRUE	Found by CROWN-seq and at least one another method
3	131381767	+	TRUE	TRUE	TRUE	FALSE	FALSE	Found by CROWN-seq and at least one another method
3	131381794	+	TRUE	TRUE	FALSE	TRUE	FALSE	Found by CROWN-seq and at least one another method
3	131502969	-	TRUE	TRUE	TRUE	FALSE	FALSE	Found by CROWN-seq and at least one another method
3	133662004	+	FALSE	TRUE	FALSE	FALSE	TRUE	Low coverage
3	133662007	+	FALSE	TRUE	FALSE	FALSE	TRUE	Low coverage
3	133805810	+	TRUE	TRUE	TRUE	TRUE	FALSE	Found by CROWN-seq and at least one another method
3	133895854	-	TRUE	TRUE	FALSE	FALSE	TRUE	Found by CROWN-seq and at least one another method
3	134485979	-	TRUE	TRUE	FALSE	TRUE	FALSE	Found by CROWN-seq and at least one another method
3	134485985	-	TRUE	TRUE	FALSE	TRUE	TRUE	Found by CROWN-seq and at least one another method
3	134486021	-	FALSE	FALSE	FALSE	FALSE	TRUE	Closest annotation <100 nt
3	134795260	+	TRUE	TRUE	FALSE	FALSE	TRUE	Found by CROWN-seq and at least one another method
3	134955103	-	FALSE	FALSE	TRUE	FALSE	FALSE	Closest annotation >=100 nt
3	136250340	+	TRUE	TRUE	FALSE	TRUE	FALSE	Found by CROWN-seq and at least one another method
3	136250352	+	TRUE	TRUE	FALSE	TRUE	FALSE	Found by CROWN-seq and at least one another method
3	136250372	+	TRUE	TRUE	FALSE	TRUE	FALSE	Found by CROWN-seq and at least one another method
3	136752378	-	TRUE	TRUE	TRUE	TRUE	FALSE	Found by CROWN-seq and at least one another method
3	136862233	+	TRUE	TRUE	FALSE	TRUE	FALSE	Found by CROWN-seq and at least one another method
3	138174929	-	TRUE	TRUE	TRUE	FALSE	FALSE	Found by CROWN-seq and at least one another method
3	139389643	-	TRUE	TRUE	TRUE	FALSE	FALSE	Found by CROWN-seq and at least one another method
3	139389648	-	TRUE	TRUE	FALSE	TRUE	FALSE	Found by CROWN-seq and at least one another method
3	139539636	-	TRUE	TRUE	TRUE	FALSE	FALSE	Found by CROWN-seq and at least one another method
3	141738277	+	TRUE	TRUE	FALSE	TRUE	FALSE	Found by CROWN-seq and at least one another method
3	141876643	+	TRUE	TRUE	TRUE	TRUE	FALSE	Found by CROWN-seq and at least one another method
3	142149493	-	TRUE	TRUE	FALSE	TRUE	FALSE	Found by CROWN-seq and at least one another method
3	143848486	-	TRUE	TRUE	FALSE	FALSE	TRUE	Found by CROWN-seq and at least one another method
3	146251122	-	TRUE	TRUE	FALSE	FALSE	TRUE	Found by CROWN-seq and at least one another method
3	146251143	-	FALSE	TRUE	FALSE	FALSE	TRUE	Low coverage
3	149086521	-	TRUE	TRUE	TRUE	FALSE	FALSE	Found by CROWN-seq and at least one another method
3	149129652	+	TRUE	TRUE	FALSE	FALSE	TRUE	Found by CROWN-seq and at least one another method
3	149752488	-	TRUE	TRUE	FALSE	TRUE	FALSE	Found by CROWN-seq and at least one another method
3	149970922	-	TRUE	TRUE	FALSE	TRUE	FALSE	Found by CROWN-seq and at least one another method
3	150408293	+	TRUE	TRUE	TRUE	FALSE	FALSE	Found by CROWN-seq and at least one another method
3	150546496	-	TRUE	TRUE	FALSE	TRUE	FALSE	Found by CROWN-seq and at least one another method
3	150603294	+	TRUE	TRUE	FALSE	TRUE	FALSE	Found by CROWN-seq and at least one another method
3	152835131	+	TRUE	TRUE	FALSE	TRUE	FALSE	Found by CROWN-seq and at least one another method
3	153162226	+	TRUE	TRUE	FALSE	TRUE	TRUE	Found by CROWN-seq and at least one another method
3	153162229	+	TRUE	TRUE	FALSE	TRUE	TRUE	Found by CROWN-seq and at least one another method
3	153162241	+	TRUE	TRUE	FALSE	TRUE	FALSE	Found by CROWN-seq and at least one another method
3	154324462	-	TRUE	TRUE	TRUE	FALSE	FALSE	Found by CROWN-seq and at least one another method
3	154324487	-	TRUE	TRUE	TRUE	FALSE	FALSE	Found by CROWN-seq and at least one another method
3	155870714	+	TRUE	TRUE	TRUE	FALSE	FALSE	Found by CROWN-seq and at least one another method
3	156674590	+	TRUE	TRUE	FALSE	TRUE	FALSE	Found by CROWN-seq and at least one another method
3	157160147	-	TRUE	TRUE	TRUE	TRUE	FALSE	Found by CROWN-seq and at least one another method
3	160399216	-	TRUE	TRUE	FALSE	FALSE	TRUE	Found by CROWN-seq and at least one another method
3	160399528	-	TRUE	TRUE	FALSE	FALSE	TRUE	Found by CROWN-seq and at least one another method
3	160399650	+	TRUE	TRUE	TRUE	TRUE	TRUE	Found by CROWN-seq and at least one another method
3	160565571	-	TRUE	TRUE	TRUE	FALSE	TRUE	Found by CROWN-seq and at least one another method
3	168095924	-	TRUE	TRUE	TRUE	FALSE	FALSE	Found by CROWN-seq and at least one another method
3	168095925	-	TRUE	TRUE	TRUE	FALSE	FALSE	Found by CROWN-seq and at least one another method
3	169663682	-	TRUE	TRUE	FALSE	FALSE	TRUE	Found by CROWN-seq and at least one another method
3	169663689	-	TRUE	TRUE	FALSE	FALSE	TRUE	Found by CROWN-seq and at least one another method
3	169812690	-	TRUE	TRUE	FALSE	FALSE	TRUE	Found by CROWN-seq and at least one another method
3	169966797	+	TRUE	TRUE	FALSE	TRUE	FALSE	Found by CROWN-seq and at least one another method
3	170037997	+	TRUE	TRUE	TRUE	FALSE	FALSE	Found by CROWN-seq and at least one another method
3	170181733	-	FALSE	TRUE	FALSE	TRUE	TRUE	Low coverage
3	171460405	-	TRUE	TRUE	TRUE	FALSE	TRUE	Found by CROWN-seq and at least one another method
3	171810458	-	FALSE	TRUE	FALSE	FALSE	TRUE	Low coverage
3	171810464	-	TRUE	TRUE	FALSE	FALSE	TRUE	Found by CROWN-seq and at least one another method
3	172750742	+	TRUE	TRUE	FALSE	FALSE	TRUE	Found by CROWN-seq and at least one another method
3	177197225	-	TRUE	TRUE	TRUE	FALSE	FALSE	Found by CROWN-seq and at least one another method
3	179333840	+	FALSE	FALSE	FALSE	TRUE	FALSE	Closest annotation >=100 nt
3	179333956	+	FALSE	FALSE	FALSE	TRUE	FALSE	Closest annotation >=100 nt
3	179562926	+	TRUE	TRUE	FALSE	TRUE	FALSE	Found by CROWN-seq and at least one another method
3	180989727	-	TRUE	TRUE	FALSE	TRUE	FALSE	Found by CROWN-seq and at least one another method
3	182980538	-	FALSE	TRUE	FALSE	FALSE	TRUE	Low coverage
3	182980599	-	TRUE	TRUE	FALSE	FALSE	TRUE	Found by CROWN-seq and at least one another method
3	184017884	-	TRUE	TRUE	FALSE	TRUE	FALSE	Found by CROWN-seq and at least one another method
3	184174855	+	TRUE	TRUE	TRUE	TRUE	TRUE	Found by CROWN-seq and at least one another method
3	184174864	+	TRUE	TRUE	FALSE	TRUE	FALSE	Found by CROWN-seq and at least one another method
3	184174875	+	TRUE	TRUE	FALSE	TRUE	FALSE	Found by CROWN-seq and at least one another method
3	184174882	+	TRUE	TRUE	FALSE	FALSE	TRUE	Found by CROWN-seq and at least one another method
3	184174890	+	TRUE	TRUE	FALSE	TRUE	FALSE	Found by CROWN-seq and at least one another method
3	184174905	+	TRUE	TRUE	FALSE	TRUE	FALSE	Found by CROWN-seq and at least one another method
3	184186200	+	TRUE	TRUE	FALSE	TRUE	FALSE	Found by CROWN-seq and at least one another method
3	184249465	-	TRUE	TRUE	FALSE	FALSE	TRUE	Found by CROWN-seq and at least one another method
3	184299254	+	FALSE	TRUE	TRUE	FALSE	TRUE	Low coverage
3	184314590	+	TRUE	TRUE	TRUE	FALSE	FALSE	Found by CROWN-seq and at least one another method
3	184314608	+	TRUE	TRUE	FALSE	TRUE	FALSE	Found by CROWN-seq and at least one another method
3	184363361	+	TRUE	TRUE	TRUE	TRUE	FALSE	Found by CROWN-seq and at least one another method
3	184711989	-	TRUE	TRUE	FALSE	TRUE	FALSE	Found by CROWN-seq and at least one another method
3	184812143	+	TRUE	TRUE	FALSE	FALSE	TRUE	Found by CROWN-seq and at least one another method
3	184812147	+	TRUE	TRUE	FALSE	FALSE	TRUE	Found by CROWN-seq and at least one another method
3	184812166	+	TRUE	TRUE	FALSE	FALSE	TRUE	Found by CROWN-seq and at least one another method
3	185254049	-	TRUE	TRUE	FALSE	FALSE	TRUE	Found by CROWN-seq and at least one another method
3	185282976	+	TRUE	TRUE	FALSE	TRUE	FALSE	Found by CROWN-seq and at least one another method
3	185499035	-	TRUE	TRUE	FALSE	TRUE	FALSE	Found by CROWN-seq and at least one another method
3	185937987	-	TRUE	TRUE	TRUE	FALSE	FALSE	Found by CROWN-seq and at least one another method
3	185938014	-	TRUE	TRUE	FALSE	TRUE	FALSE	Found by CROWN-seq and at least one another method
3	186570691	+	TRUE	TRUE	FALSE	TRUE	FALSE	Found by CROWN-seq and at least one another method
3	187139509	-	TRUE	TRUE	FALSE	TRUE	FALSE	Found by CROWN-seq and at least one another method
3	191329242	+	FALSE	TRUE	FALSE	FALSE	TRUE	Low coverage
3	194136148	+	TRUE	TRUE	FALSE	FALSE	TRUE	Found by CROWN-seq and at least one another method
3	194685883	+	TRUE	TRUE	FALSE	TRUE	FALSE	Found by CROWN-seq and at least one another method
3	195271159	-	TRUE	TRUE	FALSE	TRUE	FALSE	Found by CROWN-seq and at least one another method
3	195990290	-	FALSE	TRUE	TRUE	TRUE	FALSE	Low coverage
3	196082090	-	TRUE	TRUE	TRUE	TRUE	FALSE	Found by CROWN-seq and at least one another method
3	196287674	-	TRUE	TRUE	FALSE	FALSE	TRUE	Found by CROWN-seq and at least one another method
3	196942526	-	TRUE	TRUE	TRUE	TRUE	TRUE	Found by CROWN-seq and at least one another method
3	196942560	-	TRUE	TRUE	FALSE	FALSE	TRUE	Found by CROWN-seq and at least one another method
4	499240	+	TRUE	TRUE	FALSE	TRUE	FALSE	Found by CROWN-seq and at least one another method
4	705832	+	TRUE	TRUE	TRUE	FALSE	FALSE	Found by CROWN-seq and at least one another method
4	781849	-	FALSE	TRUE	FALSE	TRUE	FALSE	Low coverage
4	932475	+	TRUE	TRUE	FALSE	TRUE	FALSE	Found by CROWN-seq and at least one another method
4	1251015	+	FALSE	FALSE	FALSE	TRUE	FALSE	Closest annotation >=100 nt
4	1289894	+	TRUE	TRUE	FALSE	TRUE	FALSE	Found by CROWN-seq and at least one another method
4	1712319	-	TRUE	TRUE	TRUE	TRUE	FALSE	Found by CROWN-seq and at least one another method
4	1721519	+	TRUE	TRUE	TRUE	TRUE	FALSE	Found by CROWN-seq and at least one another method
4	1721522	+	TRUE	TRUE	FALSE	TRUE	FALSE	Found by CROWN-seq and at least one another method
4	1793293	+	TRUE	TRUE	FALSE	TRUE	FALSE	Found by CROWN-seq and at least one another method
4	2008982	-	TRUE	TRUE	FALSE	TRUE	FALSE	Found by CROWN-seq and at least one another method
4	2042020	+	TRUE	TRUE	TRUE	FALSE	FALSE	Found by CROWN-seq and at least one another method
4	2240870	-	FALSE	FALSE	FALSE	TRUE	FALSE	Closest annotation >=100 nt
4	2242121	-	TRUE	TRUE	FALSE	TRUE	FALSE	Found by CROWN-seq and at least one another method
4	2262148	-	TRUE	TRUE	TRUE	FALSE	FALSE	Found by CROWN-seq and at least one another method
4	2965872	+	FALSE	FALSE	FALSE	TRUE	FALSE	Closest annotation >=100 nt
4	3074690	+	TRUE	TRUE	FALSE	TRUE	FALSE	Found by CROWN-seq and at least one another method
4	3532420	-	TRUE	TRUE	TRUE	TRUE	FALSE	Found by CROWN-seq and at least one another method
4	4248221	-	TRUE	TRUE	TRUE	FALSE	FALSE	Found by CROWN-seq and at least one another method
4	4290147	-	TRUE	TRUE	TRUE	FALSE	FALSE	Found by CROWN-seq and at least one another method
4	4290154	-	TRUE	TRUE	FALSE	TRUE	FALSE	Found by CROWN-seq and at least one another method
4	4859665	+	TRUE	TRUE	FALSE	TRUE	FALSE	Found by CROWN-seq and at least one another method
4	6640658	+	TRUE	TRUE	FALSE	FALSE	TRUE	Found by CROWN-seq and at least one another method
4	6640685	+	TRUE	TRUE	TRUE	FALSE	TRUE	Found by CROWN-seq and at least one another method
4	6674076	+	TRUE	TRUE	TRUE	FALSE	FALSE	Found by CROWN-seq and at least one another method
4	6709859	-	TRUE	TRUE	TRUE	TRUE	FALSE	Found by CROWN-seq and at least one another method
4	7068042	-	TRUE	TRUE	FALSE	TRUE	FALSE	Found by CROWN-seq and at least one another method
4	10116799	-	TRUE	TRUE	TRUE	FALSE	FALSE	Found by CROWN-seq and at least one another method
4	11368602	+	FALSE	TRUE	FALSE	TRUE	FALSE	Low coverage
4	13484338	-	TRUE	TRUE	FALSE	TRUE	FALSE	Found by CROWN-seq and at least one another method
4	15479221	+	TRUE	TRUE	FALSE	FALSE	TRUE	Found by CROWN-seq and at least one another method
4	15479224	+	TRUE	TRUE	FALSE	FALSE	TRUE	Found by CROWN-seq and at least one another method
4	15681566	-	TRUE	TRUE	FALSE	TRUE	FALSE	Found by CROWN-seq and at least one another method
4	15681827	+	TRUE	TRUE	FALSE	FALSE	TRUE	Found by CROWN-seq and at least one another method
4	17512090	-	TRUE	TRUE	TRUE	FALSE	FALSE	Found by CROWN-seq and at least one another method
4	17577437	+	TRUE	TRUE	FALSE	TRUE	FALSE	Found by CROWN-seq and at least one another method
4	17614646	+	TRUE	TRUE	TRUE	TRUE	FALSE	Found by CROWN-seq and at least one another method
4	17810710	-	TRUE	TRUE	FALSE	TRUE	FALSE	Found by CROWN-seq and at least one another method
4	17810751	-	TRUE	TRUE	FALSE	TRUE	FALSE	Found by CROWN-seq and at least one another method
4	17810984	+	TRUE	TRUE	TRUE	FALSE	FALSE	Found by CROWN-seq and at least one another method
4	18021735	-	FALSE	TRUE	FALSE	FALSE	TRUE	Low coverage
4	22728023	-	FALSE	TRUE	TRUE	FALSE	FALSE	Low coverage
4	24584534	-	TRUE	TRUE	FALSE	TRUE	FALSE	Found by CROWN-seq and at least one another method
4	24584539	-	TRUE	TRUE	TRUE	TRUE	FALSE	Found by CROWN-seq and at least one another method
4	25160704	+	FALSE	TRUE	FALSE	FALSE	TRUE	Low coverage
4	37826721	+	TRUE	TRUE	TRUE	FALSE	FALSE	Found by CROWN-seq and at least one another method
4	39458948	-	TRUE	TRUE	TRUE	FALSE	FALSE	Found by CROWN-seq and at least one another method
4	39698139	+	TRUE	TRUE	TRUE	FALSE	FALSE	Found by CROWN-seq and at least one another method
4	39698169	+	TRUE	TRUE	FALSE	FALSE	TRUE	Found by CROWN-seq and at least one another method
4	41256902	+	TRUE	TRUE	TRUE	FALSE	FALSE	Found by CROWN-seq and at least one another method
4	41935137	+	TRUE	TRUE	FALSE	TRUE	FALSE	Found by CROWN-seq and at least one another method
4	41935153	+	TRUE	TRUE	TRUE	FALSE	FALSE	Found by CROWN-seq and at least one another method
4	41990526	+	TRUE	TRUE	TRUE	FALSE	FALSE	Found by CROWN-seq and at least one another method
4	41990530	+	TRUE	TRUE	FALSE	TRUE	FALSE	Found by CROWN-seq and at least one another method
4	42152351	-	TRUE	TRUE	FALSE	FALSE	TRUE	Found by CROWN-seq and at least one another method
4	46724605	-	FALSE	TRUE	TRUE	FALSE	FALSE	Low coverage
4	48831083	+	TRUE	TRUE	TRUE	FALSE	FALSE	Found by CROWN-seq and at least one another method
4	49273702	+	FALSE	FALSE	TRUE	FALSE	FALSE	Closest annotation >=100 nt
4	51843153	+	TRUE	TRUE	FALSE	FALSE	TRUE	Found by CROWN-seq and at least one another method
4	52597640	-	FALSE	FALSE	FALSE	TRUE	FALSE	Closest annotation >=100 nt
4	53366061	-	TRUE	TRUE	FALSE	FALSE	TRUE	Found by CROWN-seq and at least one another method
4	55395963	+	TRUE	TRUE	FALSE	TRUE	FALSE	Found by CROWN-seq and at least one another method
4	56435612	-	TRUE	TRUE	FALSE	TRUE	FALSE	Found by CROWN-seq and at least one another method
4	56435615	-	TRUE	TRUE	TRUE	FALSE	FALSE	Found by CROWN-seq and at least one another method
4	56436260	+	TRUE	TRUE	FALSE	FALSE	TRUE	Found by CROWN-seq and at least one another method
4	56436262	+	TRUE	TRUE	TRUE	FALSE	FALSE	Found by CROWN-seq and at least one another method
4	56467600	+	TRUE	TRUE	FALSE	TRUE	FALSE	Found by CROWN-seq and at least one another method
4	56467633	+	TRUE	TRUE	TRUE	TRUE	FALSE	Found by CROWN-seq and at least one another method
4	56978896	+	TRUE	TRUE	TRUE	TRUE	FALSE	Found by CROWN-seq and at least one another method
4	57110385	-	TRUE	TRUE	FALSE	FALSE	TRUE	Found by CROWN-seq and at least one another method
4	65670345	-	TRUE	TRUE	FALSE	FALSE	TRUE	Found by CROWN-seq and at least one another method
4	65670435	-	FALSE	FALSE	FALSE	FALSE	TRUE	Closest annotation <100 nt
4	65670493	-	TRUE	TRUE	FALSE	FALSE	TRUE	Found by CROWN-seq and at least one another method
4	68350090	-	TRUE	TRUE	TRUE	FALSE	FALSE	Found by CROWN-seq and at least one another method
4	70688479	+	TRUE	TRUE	FALSE	FALSE	TRUE	Found by CROWN-seq and at least one another method
4	70688532	+	TRUE	TRUE	FALSE	TRUE	FALSE	Found by CROWN-seq and at least one another method
4	70839890	-	TRUE	TRUE	TRUE	FALSE	FALSE	Found by CROWN-seq and at least one another method
4	70902343	+	FALSE	TRUE	FALSE	FALSE	TRUE	Low coverage
4	70902347	+	TRUE	TRUE	FALSE	FALSE	TRUE	Found by CROWN-seq and at least one another method
4	70902402	+	TRUE	TRUE	FALSE	FALSE	TRUE	Found by CROWN-seq and at least one another method
4	73258795	-	TRUE	TRUE	FALSE	TRUE	FALSE	Found by CROWN-seq and at least one another method
4	73258798	-	TRUE	TRUE	TRUE	TRUE	FALSE	Found by CROWN-seq and at least one another method
4	75514330	-	FALSE	TRUE	FALSE	TRUE	FALSE	Low coverage
4	75673412	-	TRUE	TRUE	TRUE	TRUE	FALSE	Found by CROWN-seq and at least one another method
4	75990945	-	TRUE	TRUE	TRUE	FALSE	FALSE	Found by CROWN-seq and at least one another method
4	78182132	-	FALSE	TRUE	TRUE	FALSE	FALSE	Low coverage
4	82373979	-	TRUE	TRUE	FALSE	TRUE	FALSE	Found by CROWN-seq and at least one another method
4	82373984	-	TRUE	TRUE	TRUE	FALSE	FALSE	Found by CROWN-seq and at least one another method
4	82900426	-	FALSE	TRUE	FALSE	FALSE	TRUE	Low coverage
4	83035201	+	TRUE	TRUE	TRUE	FALSE	FALSE	Found by CROWN-seq and at least one another method
4	84966840	+	FALSE	TRUE	FALSE	FALSE	TRUE	Low coverage
4	86594319	+	TRUE	TRUE	FALSE	TRUE	FALSE	Found by CROWN-seq and at least one another method
4	87422594	+	TRUE	TRUE	FALSE	FALSE	TRUE	Found by CROWN-seq and at least one another method
4	87422597	+	TRUE	TRUE	FALSE	FALSE	TRUE	Found by CROWN-seq and at least one another method
4	88007635	+	TRUE	TRUE	FALSE	TRUE	FALSE	Found by CROWN-seq and at least one another method
4	88523746	-	TRUE	TRUE	FALSE	TRUE	FALSE	Found by CROWN-seq and at least one another method
4	88523755	-	TRUE	TRUE	FALSE	TRUE	FALSE	Found by CROWN-seq and at least one another method
4	88523763	-	TRUE	TRUE	TRUE	TRUE	FALSE	Found by CROWN-seq and at least one another method
4	88592442	+	TRUE	TRUE	FALSE	FALSE	TRUE	Found by CROWN-seq and at least one another method
4	88592483	+	TRUE	TRUE	TRUE	FALSE	TRUE	Found by CROWN-seq and at least one another method
4	88823201	-	TRUE	TRUE	FALSE	FALSE	TRUE	Found by CROWN-seq and at least one another method
4	98901979	-	FALSE	FALSE	FALSE	FALSE	TRUE	Closest annotation >=100 nt
4	98929106	-	FALSE	TRUE	FALSE	FALSE	TRUE	Low coverage
4	98929125	-	TRUE	TRUE	FALSE	TRUE	TRUE	Found by CROWN-seq and at least one another method
4	99088713	-	TRUE	TRUE	FALSE	FALSE	TRUE	Found by CROWN-seq and at least one another method
4	99088730	-	TRUE	TRUE	FALSE	TRUE	FALSE	Found by CROWN-seq and at least one another method
4	99894427	-	TRUE	TRUE	TRUE	FALSE	FALSE	Found by CROWN-seq and at least one another method
4	99950273	-	TRUE	TRUE	FALSE	TRUE	FALSE	Found by CROWN-seq and at least one another method
4	99950305	-	TRUE	TRUE	FALSE	TRUE	FALSE	Found by CROWN-seq and at least one another method
4	99950308	-	TRUE	TRUE	FALSE	TRUE	FALSE	Found by CROWN-seq and at least one another method
4	99950355	-	TRUE	TRUE	TRUE	FALSE	FALSE	Found by CROWN-seq and at least one another method
4	102826798	-	FALSE	TRUE	FALSE	FALSE	TRUE	Low coverage
4	102827540	-	FALSE	TRUE	TRUE	FALSE	FALSE	Low coverage
4	102827542	-	TRUE	TRUE	FALSE	TRUE	TRUE	Found by CROWN-seq and at least one another method
4	102827551	-	TRUE	TRUE	FALSE	FALSE	TRUE	Found by CROWN-seq and at least one another method
4	102828010	-	TRUE	TRUE	FALSE	FALSE	TRUE	Found by CROWN-seq and at least one another method
4	102869023	+	TRUE	TRUE	FALSE	TRUE	FALSE	Found by CROWN-seq and at least one another method
4	102869041	+	TRUE	TRUE	FALSE	TRUE	FALSE	Found by CROWN-seq and at least one another method
4	103076761	-	TRUE	TRUE	FALSE	FALSE	TRUE	Found by CROWN-seq and at least one another method
4	103198349	-	TRUE	TRUE	TRUE	FALSE	FALSE	Found by CROWN-seq and at least one another method
4	104492182	-	FALSE	TRUE	FALSE	FALSE	TRUE	Low coverage
4	104494890	-	TRUE	TRUE	FALSE	FALSE	TRUE	Found by CROWN-seq and at least one another method
4	104494892	-	TRUE	TRUE	FALSE	FALSE	TRUE	Found by CROWN-seq and at least one another method
4	105474059	-	TRUE	TRUE	TRUE	FALSE	FALSE	Found by CROWN-seq and at least one another method
4	105708667	-	TRUE	TRUE	FALSE	FALSE	TRUE	Found by CROWN-seq and at least one another method
4	105708681	-	TRUE	TRUE	FALSE	FALSE	TRUE	Found by CROWN-seq and at least one another method
4	105708701	-	TRUE	TRUE	FALSE	FALSE	TRUE	Found by CROWN-seq and at least one another method
4	106316548	+	TRUE	TRUE	TRUE	FALSE	FALSE	Found by CROWN-seq and at least one another method
4	107989855	+	TRUE	TRUE	TRUE	FALSE	FALSE	Found by CROWN-seq and at least one another method
4	108650626	+	TRUE	TRUE	FALSE	TRUE	FALSE	Found by CROWN-seq and at least one another method
4	109703437	-	TRUE	TRUE	FALSE	FALSE	TRUE	Found by CROWN-seq and at least one another method
4	109730068	-	TRUE	TRUE	FALSE	FALSE	TRUE	Found by CROWN-seq and at least one another method
4	109815518	+	TRUE	TRUE	TRUE	FALSE	FALSE	Found by CROWN-seq and at least one another method
4	109815786	+	TRUE	TRUE	FALSE	FALSE	TRUE	Found by CROWN-seq and at least one another method
4	110198550	-	TRUE	TRUE	FALSE	FALSE	TRUE	Found by CROWN-seq and at least one another method
4	112231773	+	TRUE	TRUE	FALSE	TRUE	FALSE	Found by CROWN-seq and at least one another method
4	112231787	+	TRUE	TRUE	FALSE	TRUE	FALSE	Found by CROWN-seq and at least one another method
4	112637092	+	TRUE	TRUE	FALSE	FALSE	TRUE	Found by CROWN-seq and at least one another method
4	112637171	+	TRUE	TRUE	FALSE	TRUE	FALSE	Found by CROWN-seq and at least one another method
4	112637174	+	TRUE	TRUE	FALSE	TRUE	FALSE	Found by CROWN-seq and at least one another method
4	112637537	+	TRUE	TRUE	FALSE	FALSE	TRUE	Found by CROWN-seq and at least one another method
4	112644670	+	FALSE	FALSE	FALSE	FALSE	TRUE	Closest annotation >=100 nt
4	114598748	+	TRUE	TRUE	FALSE	FALSE	TRUE	Found by CROWN-seq and at least one another method
4	118278723	+	FALSE	TRUE	FALSE	TRUE	FALSE	Low coverage
4	118278763	+	FALSE	TRUE	FALSE	FALSE	TRUE	Low coverage
4	119300617	-	TRUE	TRUE	FALSE	TRUE	FALSE	Found by CROWN-seq and at least one another method
4	120066827	-	TRUE	TRUE	TRUE	FALSE	FALSE	Found by CROWN-seq and at least one another method
4	121072253	-	FALSE	TRUE	FALSE	FALSE	TRUE	Low coverage
4	121696975	-	TRUE	TRUE	FALSE	TRUE	FALSE	Found by CROWN-seq and at least one another method
4	121696980	-	TRUE	TRUE	FALSE	TRUE	FALSE	Found by CROWN-seq and at least one another method
4	121696983	-	TRUE	TRUE	TRUE	FALSE	FALSE	Found by CROWN-seq and at least one another method
4	121801325	+	TRUE	TRUE	TRUE	FALSE	FALSE	Found by CROWN-seq and at least one another method
4	121801326	+	TRUE	TRUE	TRUE	FALSE	FALSE	Found by CROWN-seq and at least one another method
4	121823931	-	TRUE	TRUE	TRUE	FALSE	FALSE	Found by CROWN-seq and at least one another method
4	127782322	+	TRUE	TRUE	TRUE	TRUE	FALSE	Found by CROWN-seq and at least one another method
4	127880893	+	TRUE	TRUE	FALSE	FALSE	TRUE	Found by CROWN-seq and at least one another method
4	127880934	+	TRUE	TRUE	FALSE	TRUE	FALSE	Found by CROWN-seq and at least one another method
4	127965142	-	TRUE	TRUE	FALSE	TRUE	FALSE	Found by CROWN-seq and at least one another method
4	127965210	-	FALSE	TRUE	FALSE	FALSE	TRUE	Low coverage
4	127965230	-	TRUE	TRUE	FALSE	FALSE	TRUE	Found by CROWN-seq and at least one another method
4	127965963	-	TRUE	TRUE	FALSE	FALSE	TRUE	Found by CROWN-seq and at least one another method
4	130425192	+	FALSE	FALSE	TRUE	FALSE	FALSE	Closest annotation >=100 nt
4	133149294	+	TRUE	TRUE	FALSE	TRUE	TRUE	Found by CROWN-seq and at least one another method
4	139015781	+	TRUE	TRUE	FALSE	FALSE	TRUE	Found by CROWN-seq and at least one another method
4	139295805	-	TRUE	TRUE	FALSE	TRUE	FALSE	Found by CROWN-seq and at least one another method
4	139301527	+	TRUE	TRUE	FALSE	TRUE	TRUE	Found by CROWN-seq and at least one another method
4	139301531	+	TRUE	TRUE	TRUE	FALSE	FALSE	Found by CROWN-seq and at least one another method
4	139302477	-	TRUE	TRUE	FALSE	TRUE	TRUE	Found by CROWN-seq and at least one another method
4	139556191	-	TRUE	TRUE	FALSE	TRUE	FALSE	Found by CROWN-seq and at least one another method
4	139556208	-	TRUE	TRUE	FALSE	TRUE	FALSE	Found by CROWN-seq and at least one another method
4	139556219	-	TRUE	TRUE	FALSE	TRUE	TRUE	Found by CROWN-seq and at least one another method
4	139556429	-	FALSE	TRUE	FALSE	FALSE	TRUE	Low coverage
4	139665819	+	TRUE	TRUE	TRUE	FALSE	FALSE	Found by CROWN-seq and at least one another method
4	140373386	-	FALSE	TRUE	FALSE	FALSE	TRUE	Low coverage
4	140427648	-	TRUE	TRUE	FALSE	TRUE	FALSE	Found by CROWN-seq and at least one another method
4	141220903	+	TRUE	TRUE	FALSE	TRUE	FALSE	Found by CROWN-seq and at least one another method
4	143513513	+	FALSE	TRUE	TRUE	FALSE	FALSE	Low coverage
4	143513515	+	FALSE	TRUE	FALSE	FALSE	TRUE	Low coverage
4	143513529	+	FALSE	TRUE	FALSE	FALSE	TRUE	Low coverage
4	145098317	+	TRUE	TRUE	TRUE	FALSE	FALSE	Found by CROWN-seq and at least one another method
4	146175708	+	TRUE	TRUE	FALSE	TRUE	FALSE	Found by CROWN-seq and at least one another method
4	146175752	+	TRUE	TRUE	TRUE	TRUE	FALSE	Found by CROWN-seq and at least one another method
4	151015727	-	TRUE	TRUE	FALSE	TRUE	FALSE	Found by CROWN-seq and at least one another method
4	151099565	+	TRUE	TRUE	FALSE	TRUE	FALSE	Found by CROWN-seq and at least one another method
4	151099570	+	TRUE	TRUE	TRUE	FALSE	FALSE	Found by CROWN-seq and at least one another method
4	151760985	-	TRUE	TRUE	TRUE	FALSE	FALSE	Found by CROWN-seq and at least one another method
4	152411535	-	FALSE	FALSE	FALSE	TRUE	FALSE	Closest annotation >=100 nt
4	152536065	-	TRUE	TRUE	FALSE	FALSE	TRUE	Found by CROWN-seq and at least one another method
4	154550382	-	TRUE	TRUE	FALSE	TRUE	FALSE	Found by CROWN-seq and at least one another method
4	154550400	-	TRUE	TRUE	FALSE	TRUE	FALSE	Found by CROWN-seq and at least one another method
4	154550421	-	TRUE	TRUE	TRUE	TRUE	FALSE	Found by CROWN-seq and at least one another method
4	155376808	-	TRUE	TRUE	FALSE	FALSE	TRUE	Found by CROWN-seq and at least one another method
4	155376834	-	TRUE	TRUE	TRUE	FALSE	FALSE	Found by CROWN-seq and at least one another method
4	155666848	+	TRUE	TRUE	FALSE	FALSE	TRUE	Found by CROWN-seq and at least one another method
4	158723392	-	TRUE	TRUE	FALSE	TRUE	FALSE	Found by CROWN-seq and at least one another method
4	163494690	+	TRUE	TRUE	FALSE	TRUE	FALSE	Found by CROWN-seq and at least one another method
4	165112829	-	TRUE	TRUE	FALSE	TRUE	FALSE	Found by CROWN-seq and at least one another method
4	165112860	-	TRUE	TRUE	FALSE	TRUE	FALSE	Found by CROWN-seq and at least one another method
4	165379060	+	TRUE	TRUE	FALSE	TRUE	TRUE	Found by CROWN-seq and at least one another method
4	165379079	+	TRUE	TRUE	TRUE	FALSE	TRUE	Found by CROWN-seq and at least one another method
4	169010258	-	TRUE	TRUE	TRUE	FALSE	FALSE	Found by CROWN-seq and at least one another method
4	169270988	-	TRUE	TRUE	FALSE	FALSE	TRUE	Found by CROWN-seq and at least one another method
4	169757880	-	TRUE	TRUE	FALSE	TRUE	FALSE	Found by CROWN-seq and at least one another method
4	169757886	-	TRUE	TRUE	FALSE	TRUE	FALSE	Found by CROWN-seq and at least one another method
4	173334268	-	FALSE	FALSE	TRUE	FALSE	FALSE	Closest annotation <100 nt
4	173334353	-	TRUE	TRUE	FALSE	TRUE	FALSE	Found by CROWN-seq and at least one another method
4	173334384	-	TRUE	TRUE	FALSE	TRUE	FALSE	Found by CROWN-seq and at least one another method
4	173370954	+	TRUE	TRUE	FALSE	TRUE	TRUE	Found by CROWN-seq and at least one another method
4	177309874	+	TRUE	TRUE	FALSE	TRUE	FALSE	Found by CROWN-seq and at least one another method
4	184649447	-	TRUE	TRUE	FALSE	TRUE	FALSE	Found by CROWN-seq and at least one another method
4	184734089	-	TRUE	TRUE	FALSE	TRUE	FALSE	Found by CROWN-seq and at least one another method
4	185535507	-	TRUE	TRUE	FALSE	TRUE	FALSE	Found by CROWN-seq and at least one another method
4	186706925	-	FALSE	FALSE	FALSE	TRUE	FALSE	Closest annotation >=100 nt
5	218324	+	TRUE	TRUE	TRUE	FALSE	FALSE	Found by CROWN-seq and at least one another method
5	218333	+	TRUE	TRUE	FALSE	TRUE	FALSE	Found by CROWN-seq and at least one another method
5	218352	+	TRUE	TRUE	FALSE	TRUE	FALSE	Found by CROWN-seq and at least one another method
5	271624	+	TRUE	TRUE	TRUE	FALSE	FALSE	Found by CROWN-seq and at least one another method
5	271646	+	TRUE	TRUE	FALSE	TRUE	FALSE	Found by CROWN-seq and at least one another method
5	892884	+	TRUE	TRUE	TRUE	FALSE	FALSE	Found by CROWN-seq and at least one another method
5	892896	+	TRUE	TRUE	FALSE	TRUE	FALSE	Found by CROWN-seq and at least one another method
5	1633947	-	FALSE	TRUE	FALSE	TRUE	FALSE	Low coverage
5	1799837	-	TRUE	TRUE	FALSE	TRUE	FALSE	Found by CROWN-seq and at least one another method
5	1801400	+	TRUE	TRUE	TRUE	FALSE	FALSE	Found by CROWN-seq and at least one another method
5	8457691	+	FALSE	TRUE	FALSE	TRUE	FALSE	Low coverage
5	10250216	+	TRUE	TRUE	TRUE	FALSE	FALSE	Found by CROWN-seq and at least one another method
5	10250282	+	TRUE	TRUE	FALSE	TRUE	FALSE	Found by CROWN-seq and at least one another method
5	10761228	-	TRUE	TRUE	FALSE	TRUE	FALSE	Found by CROWN-seq and at least one another method
5	14143342	+	TRUE	TRUE	TRUE	FALSE	FALSE	Found by CROWN-seq and at least one another method
5	14508080	+	FALSE	FALSE	FALSE	TRUE	FALSE	Closest annotation >=100 nt
5	14798424	-	FALSE	TRUE	TRUE	FALSE	FALSE	Low coverage
5	14871778	-	TRUE	TRUE	FALSE	FALSE	TRUE	Found by CROWN-seq and at least one another method
5	16465800	-	TRUE	TRUE	FALSE	TRUE	FALSE	Found by CROWN-seq and at least one another method
5	25191009	-	FALSE	TRUE	TRUE	TRUE	FALSE	Low coverage
5	32174319	-	TRUE	TRUE	TRUE	FALSE	FALSE	Found by CROWN-seq and at least one another method
5	32444711	-	FALSE	TRUE	TRUE	FALSE	FALSE	Low coverage
[truncated: 5,481 more rows]
