# Supplementary material for: Decoding m6Am by simultaneous transcription-start mapping and methylation quantification
Source: eLife. 2025 Mar 31;13:RP104139. doi: 10.7554/eLife.104139 (PMC11957539; doi:10.7554/eLife.104139)
Supplement: Figure 3—source data 1. [file elife-104139-fig3-data1.xlsx]

## Sheet: Legends
Figure 3 - source data 1. mRNA m6Am stoichiometries in different cell lines.
Note: the whole table for all mRNA m6Am sites is too large. To download the table, please visit Zenodo: 10.5281/zenodo.12760731
Sheet 1. Non-conversion rates of A-TSNs between WT and PCIF1 KO HEK293T cells
Sheet 2. Non-conversion rates of lowly methylated A-TSNs
Sheet 3. Non-conversion rates of lowly methylated A-TSNs (histone genes)

## Sheet: 1. HEK WT vs PCIF1KO
					HEK293T			HEK293T_PCIF1KO
Chr	Position (hg38, 1-based)	Strand	Gene	Annotated by Gencode v45?	Coverage	A count	m6Am level	AG count	A count	m6Am level
1	153535991	-	S100A6	TRUE	238	232	0.97479	28	28	1
14	94110736	+	IFI27	TRUE	328	324	0.987805	40	38	0.95
9	72953053	-	ALDH1A1	TRUE	5140	5046	0.981712	194	165	0.850515
1	153545806	-	S100A4	TRUE	2289	2253	0.984273	93	50	0.537634
22	23894481	+	MIF	FALSE	176	13	0.0738636	27	8	0.296296
11	61362280	-	CYB561A3	FALSE	162	86	0.530864	23	6	0.26087
2	176002290	-	LNPK	FALSE	328	308	0.939024	57	14	0.245614
X	72572703	-	HDAC8	FALSE	149	142	0.95302	29	7	0.241379
16	69424594	+	CYB5B	FALSE	302	280	0.927152	30	7	0.233333
1	23691824	+	RPL11	FALSE	36	24	0.666667	23	5	0.217391
17	16381144	+	UBB	FALSE	45	15	0.333333	48	10	0.208333
17	38853712	-	RPL23	FALSE	46	24	0.521739	20	4	0.2
19	2785506	+	THOP1	FALSE	292	273	0.934932	21	4	0.190476
14	69398279	-	ERH	FALSE	132	17	0.128788	21	4	0.190476
17	15699771	+	ZNF286A	FALSE	151	133	0.880795	90	17	0.188889
6	34757542	+	SNRPC	FALSE	109	44	0.40367	27	5	0.185185
7	107563988	+	DUS4L	TRUE	120	100	0.833333	22	4	0.181818
7	135662504	+	STMP1	FALSE	1055	987	0.935545	77	14	0.181818
3	150546803	+	EIF2A	FALSE	162	127	0.783951	28	5	0.178571
5	160421872	+	PTTG1	FALSE	414	326	0.78744	23	4	0.173913
6	28267368	+	ZSCAN26	FALSE	114	90	0.789474	24	4	0.166667
13	33818179	+	RFC3	FALSE	481	441	0.91684	24	4	0.166667
X	153724340	-	BCAP31	FALSE	46	11	0.23913	31	5	0.16129
6	53545067	-	GCLC	FALSE	177	169	0.954802	25	4	0.16
5	151771928	+	G3BP1	TRUE	524	494	0.942748	32	5	0.15625
4	99950255	-	H2AZ1	FALSE	116	24	0.206897	45	7	0.155556
X	103686681	-	MORF4L2	FALSE	271	120	0.442804	39	6	0.153846
5	40834602	-	RPL37	FALSE	59	5	0.0847458	33	5	0.151515
16	75148494	+	ZFP1	TRUE	238	225	0.945378	20	3	0.15
22	36239609	-	APOL2	FALSE	56	51	0.910714	20	3	0.15
11	62646601	-	GANAB	FALSE	31	13	0.419355	20	3	0.15
12	52905057	-	KRT8	FALSE	746	708	0.949062	140	21	0.15
1	171485501	+	PRRC2C	FALSE	121	116	0.958678	27	4	0.148148
14	35122266	-	PPP2R3C	FALSE	162	156	0.962963	27	4	0.148148
19	19203429	-	NR2C2AP	FALSE	215	195	0.906977	21	3	0.142857
13	28659183	+	POMP	FALSE	70	8	0.114286	21	3	0.142857
16	30534826	-	ENSG00000261459	FALSE	46	43	0.934783	28	4	0.142857
15	74906823	-	FAM219B	FALSE	564	541	0.95922	21	3	0.142857
18	57621820	-	NARS1	FALSE	298	283	0.949664	28	4	0.142857
19	19516257	+	NDUFA13	FALSE	114	10	0.0877193	21	3	0.142857
7	66996844	+	TYW1	FALSE	205	187	0.912195	21	3	0.142857
12	57752341	-	CDK4	FALSE	138	104	0.753623	36	5	0.138889
3	156555089	-	SSR3	FALSE	286	235	0.821678	95	13	0.136842
X	119871912	+	NDUFA1	FALSE	80	21	0.2625	22	3	0.136364
12	56158387	+	MYL6	FALSE	298	169	0.567114	22	3	0.136364
3	197950960	+	RPL35A	FALSE	50	2	0.04	30	4	0.133333
8	108248702	-	EIF3E	FALSE	117	83	0.709402	30	4	0.133333
X	119871910	+	NDUFA1	FALSE	99	26	0.262626	45	6	0.133333
4	174283663	-	FBXO8	TRUE	439	402	0.915718	30	4	0.133333
4	39458930	-	RPL9	FALSE	107	98	0.915888	30	4	0.133333
1	45521983	-	PRDX1	FALSE	156	145	0.929487	23	3	0.130435
17	7252275	+	ELP5	FALSE	692	671	0.969653	23	3	0.130435
13	49691459	-	EBPL	FALSE	241	223	0.925311	31	4	0.129032
12	56116621	+	RPL41	FALSE	230	199	0.865217	31	4	0.129032
1	184051756	+	TSEN15	TRUE	252	240	0.952381	31	4	0.129032
1	63523532	+	EFCAB7	FALSE	1005	876	0.871642	31	4	0.129032
8	140511325	+	CHRAC1	FALSE	338	317	0.93787	24	3	0.125
2	32277962	+	YIPF4	FALSE	62	56	0.903226	24	3	0.125
11	123062128	-	HSPA8	FALSE	58	5	0.0862069	24	3	0.125
13	102845848	+	ERCC5	FALSE	318	155	0.487421	32	4	0.125
2	73234236	+	CCT7	TRUE	100	96	0.96	40	5	0.125
19	40799196	+	EGLN2	FALSE	284	252	0.887324	41	5	0.121951
17	16381156	+	UBB	FALSE	53	26	0.490566	41	5	0.121951
15	41116280	-	INO80	TRUE	56	51	0.910714	33	4	0.121212
5	40834569	-	RPL37	FALSE	75	3	0.04	33	4	0.121212
9	98056780	+	NANS	FALSE	113	104	0.920354	25	3	0.12
2	171522506	+	CYBRD1	FALSE	99	95	0.959596	25	3	0.12
1	1407217	-	MRPL20	FALSE	326	297	0.911043	50	6	0.12
21	33403455	+	IFNGR2	FALSE	268	236	0.880597	25	3	0.12
7	155644646	+	RBM33	FALSE	57	53	0.929825	25	3	0.12
14	60092004	+	PCNX4	FALSE	396	379	0.957071	25	3	0.12
17	54900866	+	TOM1L1	FALSE	86	69	0.802326	25	3	0.12
12	54037871	+	HOXC4	FALSE	411	379	0.922141	192	23	0.119792
8	38176490	-	LSM1	FALSE	1275	1166	0.91451	34	4	0.117647
5	171387863	+	NPM1	FALSE	54	12	0.222222	26	3	0.115385
1	63367662	+	ALG6	FALSE	177	168	0.949153	26	3	0.115385
X	72572683	-	HDAC8	FALSE	252	224	0.888889	26	3	0.115385
14	21269405	-	HNRNPC	FALSE	400	169	0.4225	52	6	0.115385
7	44573895	-	DDX56	TRUE	653	592	0.906585	79	9	0.113924
17	42998768	+	RPL27	FALSE	23	0	0	44	5	0.113636
20	380840	+	TRIB3	FALSE	265	244	0.920755	53	6	0.113208
10	95693899	-	TCTN3	TRUE	204	186	0.911765	98	11	0.112245
17	78378666	+	PGS1	FALSE	118	100	0.847458	27	3	0.111111
X	107717035	-	TSC22D3	FALSE	51	9	0.176471	45	5	0.111111
4	173334399	-	HMGB2	FALSE	1174	1125	0.958262	27	3	0.111111
12	54000167	+	HOXC9	FALSE	298	266	0.892617	37	4	0.108108
19	45691905	-	SNRPD2	FALSE	440	308	0.7	37	4	0.108108
16	28553946	+	SGF29	FALSE	188	83	0.441489	37	4	0.108108
9	15511004	-	PSIP1	FALSE	469	454	0.968017	28	3	0.107143
17	51153644	+	NME1-NME2	FALSE	162	64	0.395062	28	3	0.107143
11	112086768	-	TIMM8B	FALSE	997	952	0.954865	28	3	0.107143
16	2047847	-	NTHL1	TRUE	1487	1425	0.958305	57	6	0.105263
3	14178861	+	LSM3	FALSE	692	460	0.66474	57	6	0.105263
14	23556286	+	THTPA	FALSE	120	104	0.866667	38	4	0.105263
11	6481501	+	TIMM10B	TRUE	1030	879	0.853398	105	11	0.104762
10	18651586	-	NSUN6	FALSE	1130	1010	0.893805	67	7	0.104478
5	177303816	+	PRELID1	FALSE	379	277	0.730871	77	8	0.103896
5	40834597	-	RPL37	FALSE	59	6	0.101695	29	3	0.103448
4	83456130	+	MRPS18C	FALSE	61	49	0.803279	29	3	0.103448
1	8878667	-	ENO1	FALSE	333	172	0.516517	58	6	0.103448
X	55717757	+	RRAGB	FALSE	415	394	0.949398	29	3	0.103448
22	29767425	+	UQCR10	FALSE	107	9	0.0841121	29	3	0.103448
11	62839570	-	WDR74	FALSE	103	82	0.796117	39	4	0.102564
1	100133169	+	TRMT13	FALSE	315	167	0.530159	39	4	0.102564
17	69414718	+	MAP2K6	FALSE	657	639	0.972603	39	4	0.102564
19	48617816	-	RPL18	FALSE	21	2	0.0952381	49	5	0.102041
7	26200703	-	HNRNPA2B1	FALSE	120	44	0.366667	20	2	0.1
7	56064255	+	SUMF2	TRUE	184	179	0.972826	20	2	0.1
15	56733491	-	ZNF280D	FALSE	298	269	0.902685	20	2	0.1
6	30061423	+	POLR1H	FALSE	216	202	0.935185	30	3	0.1
8	71356695	-	EYA1	FALSE	205	160	0.780488	20	2	0.1
X	107717027	-	TSC22D3	FALSE	68	31	0.455882	40	4	0.1
X	77899502	+	COX7B	FALSE	308	122	0.396104	50	5	0.1
12	55728327	-	CD63	FALSE	23	6	0.26087	20	2	0.1
14	39114306	+	GEMIN2	TRUE	501	463	0.924152	30	3	0.1
3	49358347	-	GPX1	FALSE	160	121	0.75625	20	2	0.1
13	41019356	-	ELF1	FALSE	24	19	0.791667	30	3	0.1
19	17215760	+	USE1	FALSE	219	193	0.881279	20	2	0.1
15	40039181	-	SRP14	TRUE	380	313	0.823684	30	3	0.1
12	116910965	+	FBXW8	TRUE	212	200	0.943396	20	2	0.1
7	122144254	-	AASS	TRUE	703	680	0.967283	20	2	0.1
12	118061189	-	WSB2	FALSE	257	237	0.922179	20	2	0.1
5	134738515	+	CAMLG	TRUE	204	192	0.941176	20	2	0.1
12	116738336	+	RNFT2	FALSE	98	91	0.928571	20	2	0.1
14	70359598	-	COX16	FALSE	20	11	0.55	20	2	0.1
11	14520367	-	PSMA1	FALSE	347	320	0.92219	20	2	0.1
17	78214246	+	BIRC5	FALSE	133	123	0.924812	20	2	0.1
5	138332145	+	FAM53C	FALSE	73	69	0.945205	20	2	0.1
10	92593073	+	KIF11	FALSE	34	31	0.911765	20	2	0.1
15	60004222	+	FOXB1	FALSE	50	41	0.82	20	2	0.1
10	118342298	-	FAM204A	FALSE	137	116	0.846715	20	2	0.1
12	57488106	+	MARS1	FALSE	32	30	0.9375	20	2	0.1
3	41962051	-	ULK4	FALSE	157	148	0.942675	41	4	0.097561
6	1609913	+	FOXC1	FALSE	683	549	0.803807	72	7	0.0972222
3	14125017	+	TMEM43	FALSE	266	243	0.913534	31	3	0.0967742
12	56221930	-	RNF41	FALSE	47	25	0.531915	31	3	0.0967742
19	35740561	-	IGFLR1	FALSE	591	537	0.908629	31	3	0.0967742
X	153794564	+	SSR4	FALSE	45	43	0.955556	31	3	0.0967742
1	109090769	+	TMEM167B	FALSE	281	269	0.957295	31	3	0.0967742
19	48617819	-	RPL18	FALSE	20	1	0.05	31	3	0.0967742
X	38561547	+	TSPAN7	FALSE	159	144	0.90566	31	3	0.0967742
19	35745660	+	PSENEN	FALSE	229	208	0.908297	31	3	0.0967742
17	16353436	-	CENPV	FALSE	982	916	0.93279	73	7	0.0958904
1	37514754	-	MEAF6	FALSE	403	391	0.970223	21	2	0.0952381
3	161221324	+	NMD3	TRUE	262	217	0.828244	21	2	0.0952381
17	48626292	-	HOXB9	FALSE	44	41	0.931818	21	2	0.0952381
3	53891855	-	SELENOK	TRUE	2766	2567	0.928055	21	2	0.0952381
17	37609369	-	SYNRG	FALSE	383	376	0.981723	21	2	0.0952381
X	47218313	+	CDK16	FALSE	342	272	0.795322	21	2	0.0952381
X	119236309	+	PGRMC1	FALSE	143	19	0.132867	21	2	0.0952381
10	97446185	+	ZDHHC16	FALSE	165	149	0.90303	42	4	0.0952381
7	100706091	+	POP7	FALSE	882	827	0.937642	21	2	0.0952381
15	64841915	+	PLEKHO2	TRUE	205	195	0.95122	21	2	0.0952381
12	57745069	+	TSPAN31	TRUE	403	377	0.935484	21	2	0.0952381
15	64381429	-	PCLAF	FALSE	30	4	0.133333	21	2	0.0952381
1	35193119	-	SFPQ	FALSE	111	30	0.27027	84	8	0.0952381
15	34343105	-	NOP10	FALSE	483	443	0.917184	21	2	0.0952381
17	38853710	-	RPL23	FALSE	107	61	0.570093	21	2	0.0952381
15	41559238	+	TYRO3	FALSE	57	54	0.947368	21	2	0.0952381
5	71587305	+	MCCC2	FALSE	310	288	0.929032	21	2	0.0952381
2	159615441	-	BAZ2B	FALSE	89	80	0.898876	21	2	0.0952381
8	60517221	+	RAB2A	FALSE	150	134	0.893333	21	2	0.0952381
6	30626879	+	ATAT1	FALSE	200	178	0.89	32	3	0.09375
17	75042652	-	ATP5PD	FALSE	99	1	0.010101	32	3	0.09375
12	21657776	-	LDHB	FALSE	552	482	0.873188	32	3	0.09375
1	67430411	-	SERBP1	FALSE	511	420	0.821918	32	3	0.09375
19	13116725	-	TRMT1	TRUE	150	127	0.846667	64	6	0.09375
9	34329240	-	KIF24	FALSE	222	203	0.914414	32	3	0.09375
3	47513360	-	ELP6	FALSE	113	101	0.893805	32	3	0.09375
19	572632	+	BSG	FALSE	36	6	0.166667	32	3	0.09375
14	60981079	-	TRMT5	TRUE	2014	1840	0.913605	107	10	0.0934579
16	1773119	-	MRPS34	FALSE	539	458	0.849722	75	7	0.0933333
17	51260534	+	UTP18	FALSE	473	450	0.951374	43	4	0.0930233
16	1826807	-	HAGH	TRUE	453	445	0.98234	43	4	0.0930233
6	142147274	+	VTA1	FALSE	561	514	0.916221	43	4	0.0930233
X	72276176	-	RPS4X	FALSE	23	0	0	43	4	0.0930233
5	79991262	-	MTX3	TRUE	923	868	0.940412	54	5	0.0925926
5	72320383	+	PTCD2	FALSE	393	359	0.913486	76	7	0.0921053
11	695047	-	DEAF1	FALSE	1114	1014	0.910233	98	9	0.0918367
9	136712572	+	DIPK1B	TRUE	314	292	0.929936	22	2	0.0909091
1	26432328	+	DHDDS	FALSE	67	54	0.80597	22	2	0.0909091
16	30064199	+	ALDOA	FALSE	62	46	0.741935	22	2	0.0909091
20	17968956	+	MGME1	FALSE	110	106	0.963636	22	2	0.0909091
9	128787354	+	TBC1D13	FALSE	165	146	0.884848	22	2	0.0909091
2	38751332	-	SRSF7	FALSE	95	0	0	22	2	0.0909091
12	75390901	-	CAPS2	TRUE	717	695	0.969317	22	2	0.0909091
2	169694356	-	CFAP210	FALSE	499	466	0.933868	22	2	0.0909091
3	24494803	-	THRB	TRUE	400	359	0.8975	22	2	0.0909091
1	61082579	+	NFIA	FALSE	280	250	0.892857	44	4	0.0909091
8	33513138	-	TTI2	FALSE	91	88	0.967033	22	2	0.0909091
5	55160193	+	GPX8	FALSE	63	34	0.539683	33	3	0.0909091
3	9363070	+	THUMPD3	FALSE	408	383	0.938725	22	2	0.0909091
X	119791663	-	RPL39	FALSE	203	185	0.91133	22	2	0.0909091
15	67254651	-	AAGAB	FALSE	241	234	0.970954	22	2	0.0909091
8	81842181	-	SNX16	FALSE	164	151	0.920732	22	2	0.0909091
X	55000412	+	APEX2	FALSE	83	82	0.987952	22	2	0.0909091
X	101617909	-	ARMCX6	FALSE	30	4	0.133333	22	2	0.0909091
1	234610200	-	IRF2BP2	FALSE	93	75	0.806452	22	2	0.0909091
17	50373170	-	MRPL27	FALSE	212	178	0.839623	33	3	0.0909091
7	64666183	+	ZNF107	FALSE	63	61	0.968254	22	2	0.0909091
15	76311431	-	ETFA	FALSE	696	650	0.933908	33	3	0.0909091
14	39114298	+	GEMIN2	FALSE	552	484	0.876812	22	2	0.0909091
16	30355270	-	CD2BP2	FALSE	147	140	0.952381	22	2	0.0909091
14	77761130	-	SNW1	FALSE	116	39	0.336207	22	2	0.0909091
6	43059631	+	KLC4	TRUE	1454	1340	0.921596	100	9	0.09
11	70203252	+	FADD	FALSE	191	179	0.937173	67	6	0.0895522
2	10812696	-	PDIA6	FALSE	43	38	0.883721	56	5	0.0892857
X	72276173	-	RPS4X	FALSE	39	2	0.0512821	56	5	0.0892857
2	240561040	-	ANKMY1	FALSE	363	323	0.889807	45	4	0.0888889
9	19380195	-	RPS6	FALSE	21	1	0.047619	34	3	0.0882353
5	178153880	-	NHP2	FALSE	560	530	0.946429	34	3	0.0882353
3	132417517	+	DNAJC13	FALSE	972	935	0.961934	34	3	0.0882353
4	17810987	+	NCAPG	FALSE	153	136	0.888889	23	2	0.0869565
X	106168357	+	PWWP3B	FALSE	27	24	0.888889	23	2	0.0869565
11	63938985	+	NAA40	FALSE	39	37	0.948718	23	2	0.0869565
6	56542808	-	DST	TRUE	166	144	0.86747	23	2	0.0869565
8	11795572	+	FDFT1	FALSE	138	126	0.913043	23	2	0.0869565
22	38656411	-	FAM227A	FALSE	247	233	0.94332	23	2	0.0869565
19	19203386	-	NR2C2AP	FALSE	566	510	0.90106	23	2	0.0869565
17	1400161	-	YWHAE	FALSE	333	214	0.642643	46	4	0.0869565
5	121961985	+	SRFBP1	FALSE	142	129	0.908451	23	2	0.0869565
16	84187052	-	TAF1C	TRUE	224	210	0.9375	23	2	0.0869565
6	3118707	+	BPHL	FALSE	254	246	0.968504	23	2	0.0869565
17	8383161	-	RPL26	FALSE	374	356	0.951872	23	2	0.0869565
1	23959164	+	PNRC2	FALSE	369	334	0.905149	23	2	0.0869565
X	77899513	+	COX7B	FALSE	236	95	0.402542	46	4	0.0869565
12	120710431	+	UNC119B	FALSE	158	152	0.962025	23	2	0.0869565
9	122264908	+	MRRF	FALSE	49	46	0.938776	23	2	0.0869565
12	100267076	-	DEPDC4	FALSE	257	246	0.957198	23	2	0.0869565
2	201451565	-	TRAK2	FALSE	264	248	0.939394	23	2	0.0869565
15	44195271	-	FRMD5	TRUE	39	32	0.820513	23	2	0.0869565
3	128123820	-	RUVBL1	FALSE	185	136	0.735135	23	2	0.0869565
17	75667334	+	SAP30BP	FALSE	304	289	0.950658	23	2	0.0869565
20	49219356	+	DDX27	FALSE	389	367	0.943445	23	2	0.0869565
5	171387823	+	NPM1	FALSE	522	497	0.952107	104	9	0.0865385
8	108248695	-	EIF3E	FALSE	125	67	0.536	35	3	0.0857143
11	34916330	-	APIP	FALSE	376	365	0.970745	35	3	0.0857143
19	36114856	-	POLR2I	FALSE	226	192	0.849558	70	6	0.0857143
1	168178962	+	TIPRL	TRUE	1437	1342	0.93389	35	3	0.0857143
2	70302011	-	FAM136A	FALSE	423	372	0.879433	35	3	0.0857143
17	42998414	+	RPL27	FALSE	334	318	0.952096	35	3	0.0857143
20	35954696	+	CNBD2	FALSE	360	302	0.838889	35	3	0.0857143
12	133037288	+	ZNF84	FALSE	111	106	0.954955	35	3	0.0857143
17	42121356	-	KAT2A	FALSE	531	494	0.93032	59	5	0.0847458
4	103099880	-	BDH2	FALSE	673	626	0.930163	59	5	0.0847458
X	103686685	-	MORF4L2	FALSE	668	444	0.664671	83	7	0.0843373
10	124801806	+	ABRAXAS2	FALSE	1375	1250	0.909091	119	10	0.0840336
6	13615359	+	NOL7	FALSE	1416	1321	0.93291	131	11	0.0839695
2	170929191	+	GORASP2	FALSE	191	176	0.921466	24	2	0.0833333
11	6683299	-	MRPL17	FALSE	120	15	0.125	24	2	0.0833333
3	51941885	-	RRP9	FALSE	581	552	0.950086	24	2	0.0833333
12	116881477	-	HRK	FALSE	118	101	0.855932	24	2	0.0833333
2	223837566	-	AP1S3	FALSE	289	255	0.882353	36	3	0.0833333
14	67359785	-	ATP6V1D	FALSE	898	798	0.888641	24	2	0.0833333
15	82540428	-	RPS17	FALSE	201	105	0.522388	60	5	0.0833333
X	21839636	+	MBTPS2	TRUE	115	106	0.921739	24	2	0.0833333
5	172983792	+	ATP6V0E1	FALSE	326	317	0.972393	24	2	0.0833333
12	6724046	+	COPS7A	TRUE	1025	953	0.929756	36	3	0.0833333
20	17969080	+	MGME1	FALSE	56	47	0.839286	24	2	0.0833333
X	152830952	+	NSDHL	FALSE	142	133	0.93662	24	2	0.0833333
3	14651769	+	CCDC174	FALSE	222	207	0.932432	24	2	0.0833333
11	110429991	+	FDX1	FALSE	362	350	0.966851	24	2	0.0833333
5	126777161	+	LMNB1	TRUE	77	26	0.337662	24	2	0.0833333
3	32685284	+	CNOT10	FALSE	169	160	0.946746	24	2	0.0833333
17	1400169	-	YWHAE	FALSE	278	165	0.593525	48	4	0.0833333
6	31806710	-	LSM2	FALSE	23	19	0.826087	36	3	0.0833333
4	99950267	-	H2AZ1	FALSE	190	37	0.194737	60	5	0.0833333
12	48716780	-	CCNT1	FALSE	104	95	0.913462	24	2	0.0833333
7	27165530	-	HOXA9	FALSE	35	12	0.342857	24	2	0.0833333
4	99950252	-	H2AZ1	FALSE	210	21	0.1	108	9	0.0833333
1	110407669	-	LAMTOR5	FALSE	202	151	0.747525	24	2	0.0833333
2	27771756	+	MRPL33	FALSE	118	94	0.79661	24	2	0.0833333
6	33289252	-	WDR46	FALSE	236	228	0.966102	36	3	0.0833333
14	69398246	-	ERH	FALSE	58	2	0.0344828	36	3	0.0833333
9	128504721	+	GLE1	FALSE	137	122	0.890511	24	2	0.0833333
2	230864990	+	ITM2C	FALSE	117	112	0.957265	24	2	0.0833333
2	74421751	+	WDR54	FALSE	956	886	0.926778	97	8	0.0824742
7	100148990	+	LAMTOR4	FALSE	779	743	0.953787	122	10	0.0819672
22	21666040	+	PPIL2	TRUE	82	69	0.841463	37	3	0.0810811
13	113297234	+	LAMP1	FALSE	130	123	0.946154	25	2	0.08
12	122975232	+	OGFOD2	FALSE	129	121	0.937984	25	2	0.08
6	42879920	+	RPL7L1	TRUE	686	658	0.959184	25	2	0.08
X	55000338	+	APEX2	FALSE	111	101	0.90991	25	2	0.08
13	36999307	-	ALG5	FALSE	509	447	0.878193	100	8	0.08
2	32039816	-	DPY30	FALSE	553	539	0.974684	25	2	0.08
1	165649839	+	MGST3	FALSE	55	1	0.0181818	25	2	0.08
13	78603578	-	POU4F1	FALSE	392	370	0.943878	25	2	0.08
22	29767397	+	UQCR10	FALSE	197	56	0.284264	25	2	0.08
1	234373673	+	COA6	FALSE	353	327	0.926346	25	2	0.08
3	9844014	-	RPUSD3	FALSE	153	137	0.895425	25	2	0.08
6	44127420	-	MRPL14	FALSE	1448	1304	0.900552	25	2	0.08
7	33129540	+	BBS9	TRUE	233	219	0.939914	25	2	0.08
7	1028373	-	C7orf50	FALSE	578	525	0.908304	75	6	0.08
6	125301976	-	HDDC2	FALSE	399	391	0.97995	25	2	0.08
22	39520586	+	ATF4	FALSE	51	4	0.0784314	25	2	0.08
2	200811929	+	BZW1	FALSE	99	70	0.707071	25	2	0.08
5	139293767	+	MATR3	FALSE	128	98	0.765625	25	2	0.08
12	15882405	+	STRAP	FALSE	45	40	0.888889	25	2	0.08
7	151341785	+	NUB1	FALSE	274	259	0.945255	25	2	0.08
1	1574839	-	SSU72	FALSE	188	174	0.925532	25	2	0.08
19	572622	+	BSG	FALSE	37	17	0.459459	25	2	0.08
11	8911201	+	AKIP1	FALSE	722	676	0.936288	50	4	0.08
20	35699438	+	ROMO1	FALSE	557	533	0.956912	25	2	0.08
X	55161176	-	FAM104B	FALSE	343	324	0.944606	25	2	0.08
11	46381733	+	MDK	FALSE	95	82	0.863158	25	2	0.08
6	35259754	+	ZNF76	FALSE	38	33	0.868421	38	3	0.0789474
5	181243950	-	RACK1	FALSE	147	128	0.870748	38	3	0.0789474
6	34757527	+	SNRPC	FALSE	336	222	0.660714	38	3	0.0789474
3	179604816	+	NDUFB5	TRUE	368	335	0.910326	89	7	0.0786517
19	41860213	+	RPS19	FALSE	842	819	0.972684	51	4	0.0784314
8	63038768	-	GGH	FALSE	498	348	0.698795	51	4	0.0784314
5	133968630	-	C5orf15	FALSE	851	679	0.797885	167	13	0.0778443
4	53377645	+	FIP1L1	TRUE	272	143	0.525735	103	8	0.0776699
4	75514468	+	THAP6	FALSE	89	77	0.865169	26	2	0.0769231
19	572626	+	BSG	FALSE	112	59	0.526786	52	4	0.0769231
14	67619957	+	ARG2	FALSE	99	87	0.878788	26	2	0.0769231
17	35587298	+	AP2B1	FALSE	341	324	0.950147	39	3	0.0769231
14	22589237	-	DAD1	FALSE	1611	1544	0.958411	78	6	0.0769231
14	49620605	-	RPL36AL	FALSE	275	187	0.68	26	2	0.0769231
1	52842763	+	ZYG11A	FALSE	215	207	0.962791	26	2	0.0769231
17	30824692	-	CRLF3	TRUE	905	877	0.969061	26	2	0.0769231
2	42361187	-	COX7A2L	FALSE	242	228	0.942149	26	2	0.0769231
15	72272661	-	PARP6	FALSE	223	217	0.973094	26	2	0.0769231
6	112087517	-	TUBE1	FALSE	131	104	0.793893	26	2	0.0769231
7	90403526	+	CLDN12	FALSE	70	49	0.7	26	2	0.0769231
3	43286586	+	SNRK	TRUE	131	121	0.923664	26	2	0.0769231
8	108248684	-	EIF3E	FALSE	165	119	0.721212	39	3	0.0769231
14	66508167	+	GPHN	FALSE	65	60	0.923077	26	2	0.0769231
1	230979094	+	ARV1	TRUE	1756	1660	0.94533	52	4	0.0769231
1	40040782	+	CAP1	FALSE	248	233	0.939516	26	2	0.0769231
3	120596277	+	NDUFB4	FALSE	545	526	0.965138	26	2	0.0769231
15	65611148	-	INTS14	TRUE	507	460	0.907298	65	5	0.0769231
7	42932160	-	PSMA2	FALSE	91	4	0.043956	26	2	0.0769231
2	37084518	+	GPATCH11	TRUE	245	206	0.840816	26	2	0.0769231
X	153724339	-	BCAP31	FALSE	37	6	0.162162	26	2	0.0769231
3	196082079	-	TFRC	FALSE	220	191	0.868182	26	2	0.0769231
6	149749743	+	PCMT1	FALSE	1375	1314	0.955636	92	7	0.076087
10	3172779	-	PITRM1	TRUE	938	785	0.806252	184	14	0.076087
12	120438127	+	COX6A1	FALSE	204	21	0.102941	79	6	0.0759494
12	56116700	+	RPL41	FALSE	266	175	0.657895	53	4	0.0754717
14	21269408	-	HNRNPC	FALSE	438	167	0.381279	53	4	0.0754717
17	16381165	+	UBB	FALSE	26	15	0.576923	53	4	0.0754717
19	32971948	-	CEP89	FALSE	376	300	0.797872	40	3	0.075
20	31952042	-	PDRG1	FALSE	353	344	0.974504	40	3	0.075
19	39391394	+	MED29	FALSE	328	307	0.935976	40	3	0.075
1	162497849	+	UHMK1	FALSE	358	322	0.899441	40	3	0.075
5	178153864	-	NHP2	FALSE	660	626	0.948485	40	3	0.075
10	16817487	-	RSU1	FALSE	263	225	0.855513	40	3	0.075
14	73058626	+	RBM25	FALSE	343	330	0.962099	40	3	0.075
20	18567479	+	ENSG00000284776	FALSE	1034	930	0.89942	267	20	0.0749064
1	235328582	+	ENSG00000285053	FALSE	287	265	0.923345	67	5	0.0746269
1	34985305	-	ENSG00000284773	FALSE	135	120	0.888889	67	5	0.0746269
8	42207676	-	PLAT	TRUE	209	119	0.569378	161	12	0.0745342
1	52404627	+	PRPF38A	FALSE	72	63	0.875	27	2	0.0740741
21	33915763	-	ATP5PO	FALSE	77	22	0.285714	27	2	0.0740741
22	29767399	+	UQCR10	FALSE	254	112	0.440945	54	4	0.0740741
12	56158375	+	MYL6	FALSE	425	156	0.367059	27	2	0.0740741
22	24952716	+	KIAA1671	TRUE	105	98	0.933333	27	2	0.0740741
19	7629834	+	PET100	FALSE	309	280	0.906149	27	2	0.0740741
1	171781674	+	METTL13	FALSE	879	800	0.910125	54	4	0.0740741
17	4731462	+	MED11	FALSE	489	435	0.889571	27	2	0.0740741
2	3377887	-	EIPR1	FALSE	371	351	0.946092	27	2	0.0740741
6	122471797	-	SERINC1	FALSE	154	123	0.798701	27	2	0.0740741
12	57752402	-	CDK4	FALSE	140	132	0.942857	27	2	0.0740741
14	105491234	+	TEDC1	TRUE	386	373	0.966321	27	2	0.0740741
20	62143429	-	PSMA7	FALSE	461	447	0.969631	27	2	0.0740741
19	40576866	+	SHKBP1	FALSE	229	214	0.934498	27	2	0.0740741
14	35046279	+	FAM177A1	FALSE	406	398	0.980296	27	2	0.0740741
2	42568746	+	MTA3	FALSE	85	73	0.858824	27	2	0.0740741
1	156751697	-	HDGF	FALSE	921	774	0.840391	27	2	0.0740741
7	99616985	+	ZSCAN25	FALSE	80	76	0.95	27	2	0.0740741
X	119468480	+	SLC25A5	FALSE	266	257	0.966165	27	2	0.0740741
17	7219975	+	ACADVL	FALSE	78	75	0.961538	27	2	0.0740741
11	34052317	+	CAPRIN1	FALSE	54	48	0.888889	27	2	0.0740741
17	42017481	-	DNAJC7	FALSE	268	253	0.94403	27	2	0.0740741
7	75073834	-	RCC1L	FALSE	339	318	0.938053	27	2	0.0740741
17	7307700	+	EIF5A	FALSE	134	127	0.947761	27	2	0.0740741
1	226309161	-	LIN9	FALSE	217	189	0.870968	27	2	0.0740741
3	129183867	-	CNBP	FALSE	313	279	0.891374	27	2	0.0740741
1	228082756	+	ARF1	FALSE	186	169	0.908602	27	2	0.0740741
X	15335513	-	PIGA	FALSE	2100	1865	0.888095	272	20	0.0735294
3	169812895	-	LRRC34	FALSE	161	146	0.906832	68	5	0.0735294
X	47218296	+	CDK16	FALSE	384	330	0.859375	41	3	0.0731707
10	67838110	-	DNAJC12	FALSE	128	103	0.804688	41	3	0.0731707
8	15540253	+	TUSC3	FALSE	392	373	0.951531	41	3	0.0731707
17	42998775	+	RPL27	FALSE	55	2	0.0363636	82	6	0.0731707
17	82418362	+	HEXD	FALSE	168	151	0.89881	55	4	0.0727273
15	66505339	+	ZWILCH	FALSE	625	582	0.9312	55	4	0.0727273
17	6444451	+	PIMREG	FALSE	590	579	0.981356	55	4	0.0727273
1	225999341	-	SDE2	FALSE	143	127	0.888112	55	4	0.0727273
15	99249563	-	TTC23	FALSE	908	789	0.868943	83	6	0.0722892
4	2041995	+	C4orf48	TRUE	841	763	0.907253	111	8	0.0720721
11	65170236	+	SPDYC	FALSE	632	594	0.939873	167	12	0.0718563
15	64162986	-	PPIB	FALSE	1409	1325	0.940383	167	12	0.0718563
17	51153659	+	NME1	FALSE	83	11	0.13253	28	2	0.0714286
8	96235532	-	UQCRB	FALSE	219	43	0.196347	70	5	0.0714286
3	108589451	-	CIP2A	FALSE	428	285	0.665888	28	2	0.0714286
14	21269411	-	HNRNPC	TRUE	418	246	0.588517	42	3	0.0714286
22	28800524	-	XBP1	FALSE	131	88	0.671756	28	2	0.0714286
9	127397142	+	SLC2A8	FALSE	391	365	0.933504	28	2	0.0714286
7	73683616	+	BUD23	FALSE	140	100	0.714286	28	2	0.0714286
10	90871987	+	RPP30	FALSE	65	48	0.738462	28	2	0.0714286
12	12891565	+	GPRC5A	FALSE	147	122	0.829932	28	2	0.0714286
5	69217833	+	MRPS36	FALSE	540	506	0.937037	42	3	0.0714286
11	62653302	-	INTS5	TRUE	646	562	0.869969	168	12	0.0714286
12	104288925	+	TXNRD1	FALSE	1123	996	0.88691	70	5	0.0714286
14	21476913	-	RAB2B	FALSE	415	400	0.963855	28	2	0.0714286
1	169893935	-	SCYL3	FALSE	1102	976	0.885662	98	7	0.0714286
21	28992828	-	LTN1	FALSE	621	601	0.967794	28	2	0.0714286
1	156213062	+	PMF1	FALSE	30	9	0.3	28	2	0.0714286
5	32585585	+	SUB1	FALSE	767	673	0.877445	28	2	0.0714286
2	86337626	-	REEP1	TRUE	390	368	0.94359	28	2	0.0714286
4	76148408	-	NUP54	FALSE	166	126	0.759036	28	2	0.0714286
21	25607460	-	MRPL39	FALSE	199	169	0.849246	42	3	0.0714286
19	2328455	-	LSM7	FALSE	113	5	0.0442478	28	2	0.0714286
21	32771819	-	PAXBP1	FALSE	863	808	0.936269	42	3	0.0714286
4	87422586	+	NUDT9	FALSE	685	644	0.940146	28	2	0.0714286
11	3057407	-	CARS1	FALSE	149	130	0.872483	28	2	0.0714286
15	88913344	-	MFGE8	FALSE	67	62	0.925373	28	2	0.0714286
1	84574415	-	CTBS	FALSE	87	72	0.827586	28	2	0.0714286
16	1782538	-	SPSB3	FALSE	166	156	0.939759	28	2	0.0714286
1	212035811	+	DTL	FALSE	93	74	0.795699	28	2	0.0714286
21	33325006	+	IFNAR1	FALSE	174	157	0.902299	28	2	0.0714286
6	8435515	-	SLC35B3	FALSE	260	245	0.942308	28	2	0.0714286
21	44818079	-	SUMO3	FALSE	748	696	0.930481	28	2	0.0714286
12	124914632	-	UBC	FALSE	83	36	0.433735	57	4	0.0701754
3	129183908	-	CNBP	FALSE	7277	6574	0.903394	749	47	0.0700059
21	39387765	+	GET1	TRUE	1781	1699	0.953958	100	7	0.07
14	49586310	-	RPS29	FALSE	20	0	0	43	3	0.0697674
14	69398690	+	SLC39A9	TRUE	1856	1755	0.945582	86	6	0.0697674
17	2030155	+	DPH1	FALSE	948	864	0.911392	216	15	0.0694444
19	47048614	-	TMEM160	FALSE	896	795	0.887277	144	10	0.0694444
12	6494132	+	NCAPD2	FALSE	225	214	0.951111	29	2	0.0689655
11	66438821	-	MRPL11	FALSE	734	678	0.923706	58	4	0.0689655
10	72216311	-	ASCC1	TRUE	232	219	0.943966	29	2	0.0689655
X	48897749	-	TIMM17B	FALSE	579	522	0.901554	87	6	0.0689655
5	126595167	-	ALDH7A1	FALSE	301	278	0.923588	29	2	0.0689655
12	50112234	+	COX14	FALSE	1001	954	0.953047	29	2	0.0689655
8	96235521	-	UQCRB	FALSE	83	13	0.156627	29	2	0.0689655
2	216109425	+	XRCC5	FALSE	131	68	0.519084	29	2	0.0689655
2	27134642	-	PREB	FALSE	320	247	0.771875	29	2	0.0689655
19	19516304	+	NDUFA13	FALSE	46	11	0.23913	29	2	0.0689655
4	48831270	+	OCIAD1	FALSE	40	40	1	29	2	0.0689655
1	26432371	+	DHDDS	TRUE	143	134	0.937063	29	2	0.0689655
3	184561785	+	EPHB3	TRUE	158	124	0.78481	29	2	0.0689655
2	65227849	+	ACTR2	FALSE	96	20	0.208333	29	2	0.0689655
11	14520448	-	PSMA1	FALSE	483	456	0.944099	29	2	0.0689655
7	27140243	-	HOXA3	FALSE	74	72	0.972973	29	2	0.0689655
11	3057392	-	CARS1	FALSE	136	132	0.970588	29	2	0.0689655
2	38778195	+	GEMIN6	FALSE	1219	1113	0.913043	116	8	0.0689655
11	62728526	+	TTC9C	FALSE	102	95	0.931373	29	2	0.0689655
20	31514479	+	HM13	FALSE	135	126	0.933333	29	2	0.0689655
3	197950965	+	RPL35A	FALSE	25	0	0	29	2	0.0689655
12	104288867	+	TXNRD1	FALSE	157	138	0.878981	29	2	0.0689655
19	14572013	-	NDUFB7	FALSE	373	358	0.959786	29	2	0.0689655
8	73878822	-	ENSG00000258677	FALSE	348	258	0.741379	58	4	0.0689655
3	33645464	-	CLASP2	FALSE	38	2	0.0526316	29	2	0.0689655
9	128689275	+	SET	FALSE	270	241	0.892593	29	2	0.0689655
20	63216113	-	YTHDF1	FALSE	147	124	0.843537	29	2	0.0689655
X	154398318	+	RPL10	FALSE	1879	1763	0.938265	146	10	0.0684932
9	136992444	+	PAXX	FALSE	397	347	0.874055	146	10	0.0684932
X	23783171	+	SAT1	FALSE	574	522	0.909408	88	6	0.0681818
2	9630978	-	YWHAQ	FALSE	222	144	0.648649	44	3	0.0681818
8	71356705	-	EYA1	FALSE	366	318	0.868852	44	3	0.0681818
2	241150489	+	PPP1R7	FALSE	482	465	0.96473	44	3	0.0681818
3	185282976	+	MAP3K13	FALSE	458	393	0.858079	44	3	0.0681818
5	40834583	-	RPL37	FALSE	87	1	0.0114943	44	3	0.0681818
2	27663650	-	SUPT7L	FALSE	297	278	0.936027	44	3	0.0681818
20	50510383	+	PTPN1	TRUE	3487	3226	0.924561	312	21	0.0673077
19	43754932	-	SMG9	FALSE	361	334	0.925208	134	9	0.0671642
11	62573849	-	EEF1G	FALSE	89	68	0.764045	45	3	0.0666667
11	67469272	-	TMEM134	TRUE	125	121	0.968	30	2	0.0666667
22	41468653	-	PHF5A	FALSE	100	88	0.88	30	2	0.0666667
GL000194.1	115038	-	MAFIP	FALSE	153	147	0.960784	45	3	0.0666667
2	74472660	-	MRPL53	FALSE	242	200	0.826446	105	7	0.0666667
11	75399572	+	RPS3	FALSE	120	11	0.0916667	105	7	0.0666667
7	44796705	+	PPIA	FALSE	22	9	0.409091	30	2	0.0666667
6	42879622	+	RPL7L1	FALSE	182	170	0.934066	30	2	0.0666667
3	49022145	+	NDUFAF3	FALSE	66	55	0.833333	30	2	0.0666667
2	176107289	+	HOXD11	FALSE	480	444	0.925	45	3	0.0666667
14	70359615	-	COX16	FALSE	313	277	0.884984	45	3	0.0666667
7	76048157	+	MDH2	FALSE	165	159	0.963636	30	2	0.0666667
12	102120255	+	PARPBP	FALSE	94	48	0.510638	30	2	0.0666667
22	35400191	+	MCM5	FALSE	346	291	0.84104	60	4	0.0666667
X	115610250	+	PLS3	FALSE	43	3	0.0697674	30	2	0.0666667
2	168890422	-	SPC25	FALSE	215	198	0.92093	30	2	0.0666667
15	78438320	+	IREB2	FALSE	556	529	0.951439	30	2	0.0666667
11	68903810	-	MRPL21	FALSE	1427	1338	0.937631	270	18	0.0666667
11	72112758	-	ANAPC15	FALSE	618	582	0.941748	30	2	0.0666667
X	69165447	-	PJA1	FALSE	160	149	0.93125	30	2	0.0666667
8	33513132	-	TTI2	FALSE	99	95	0.959596	30	2	0.0666667
14	35292398	+	PSMA6	TRUE	173	161	0.930636	30	2	0.0666667
1	37692497	+	CDCA8	FALSE	143	129	0.902098	30	2	0.0666667
14	73950094	-	FAM161B	TRUE	122	110	0.901639	45	3	0.0666667
3	88149815	-	CGGBP1	TRUE	170	144	0.847059	30	2	0.0666667
10	68901280	+	DDX50	FALSE	396	369	0.931818	60	4	0.0666667
11	47553159	-	CELF1	FALSE	113	102	0.902655	30	2	0.0666667
1	147172550	-	PRKAB2	TRUE	83	75	0.903614	30	2	0.0666667
7	100119624	+	CNPY4	FALSE	90	86	0.955556	30	2	0.0666667
3	138187553	+	ARMC8	FALSE	70	65	0.928571	30	2	0.0666667
1	25906397	-	STMN1	FALSE	604	529	0.875828	45	3	0.0666667
21	32279047	-	MIS18A	FALSE	1237	1068	0.863379	391	34	0.0664284
14	74084963	+	LIN52	TRUE	2143	1891	0.882408	318	21	0.0660377
18	21612289	+	SNRPD1	FALSE	424	400	0.943396	91	6	0.0659341
7	56064265	+	SUMF2	TRUE	588	564	0.959184	91	6	0.0659341
14	74713170	+	FCF1	TRUE	2127	1985	0.933239	76	5	0.0657895
12	55974064	+	RAB5B	FALSE	422	384	0.909953	61	4	0.0655738
14	58244873	+	PSMA3	TRUE	673	600	0.89153	61	4	0.0655738
17	18858159	+	PRPSAP2	FALSE	2382	2017	0.846767	275	18	0.0654545
5	97183191	-	RIOK2	FALSE	338	278	0.822485	46	3	0.0652174
7	23182057	+	NUP42	FALSE	390	355	0.910256	46	3	0.0652174
7	100148979	+	LAMTOR4	FALSE	287	260	0.905923	46	3	0.0652174
3	146544654	-	PLSCR1	FALSE	1714	1621	0.945741	46	3	0.0652174
3	129316256	-	H1-10	FALSE	287	254	0.885017	46	3	0.0652174
2	183124365	+	NUP35	FALSE	178	172	0.966292	46	3	0.0652174
11	75399569	+	RPS3	FALSE	76	7	0.0921053	46	3	0.0652174
X	77899512	+	COX7B	FALSE	327	67	0.204893	92	6	0.0652174
6	31665858	-	GPANK1	FALSE	1103	984	0.892112	170	11	0.0647059
14	23302857	-	PPP1R3E	FALSE	267	241	0.902622	31	2	0.0645161
5	134648816	+	SEC24A	FALSE	78	73	0.935897	31	2	0.0645161
13	41132799	-	KBTBD6	FALSE	288	268	0.930556	31	2	0.0645161
15	77420940	+	HMG20A	FALSE	82	70	0.853659	31	2	0.0645161
13	45464976	+	COG3	FALSE	510	494	0.968627	31	2	0.0645161
19	19516303	+	NDUFA13	FALSE	35	4	0.114286	31	2	0.0645161
14	76812861	-	ANGEL1	TRUE	671	662	0.986587	31	2	0.0645161
15	64825625	-	PIF1	TRUE	691	661	0.956585	31	2	0.0645161
X	119871922	+	NDUFA1	FALSE	83	48	0.578313	31	2	0.0645161
6	125781197	+	NCOA7	FALSE	30	21	0.7	31	2	0.0645161
20	49046288	+	CSE1L	FALSE	221	209	0.945701	31	2	0.0645161
12	132710870	+	PGAM5	FALSE	158	145	0.917722	31	2	0.0645161
9	13279571	-	MPDZ	FALSE	74	65	0.878378	31	2	0.0645161
18	32091891	+	RNF138	TRUE	83	80	0.963855	31	2	0.0645161
21	36320199	+	MORC3	FALSE	363	362	0.997245	31	2	0.0645161
8	31033808	+	WRN	FALSE	138	108	0.782609	31	2	0.0645161
11	67119284	+	KDM2A	FALSE	66	60	0.909091	31	2	0.0645161
3	45842158	-	LZTFL1	FALSE	597	574	0.961474	78	5	0.0641026
12	21654627	-	LDHB	FALSE	45	2	0.0444444	47	3	0.0638298
3	48609634	-	UQCRC1	FALSE	716	685	0.956704	47	3	0.0638298
14	21269334	-	HNRNPC	FALSE	31	3	0.0967742	47	3	0.0638298
9	21994331	-	CDKN2A	FALSE	258	217	0.841085	63	4	0.0634921
16	30610351	-	ENSG00000289491	TRUE	449	368	0.819599	158	10	0.0632911
12	56315908	-	CNPY2	FALSE	1378	1344	0.975327	95	6	0.0631579
1	37690529	-	AIRIM	TRUE	1666	1521	0.912965	622	34	0.062915
2	47176498	-	CALM2	FALSE	508	408	0.80315	48	3	0.0625
16	74666839	-	RFWD3	TRUE	53	40	0.754717	32	2	0.0625
1	37595933	-	GNL2	FALSE	170	120	0.705882	48	3	0.0625
7	76358989	-	YWHAG	FALSE	381	376	0.986877	32	2	0.0625
4	174283642	-	FBXO8	FALSE	193	176	0.911917	32	2	0.0625
1	32222442	+	EIF3I	FALSE	67	49	0.731343	32	2	0.0625
4	99950245	-	H2AZ1	FALSE	181	49	0.270718	96	6	0.0625
6	32968670	+	BRD2	FALSE	84	73	0.869048	32	2	0.0625
1	47314147	-	STIL	TRUE	271	259	0.95572	32	2	0.0625
11	65712031	+	KAT5	FALSE	348	327	0.939655	32	2	0.0625
15	68820865	-	ANP32A	FALSE	834	773	0.926859	32	2	0.0625
15	40405819	+	IVD	FALSE	673	610	0.906389	80	5	0.0625
6	33322914	-	DAXX	FALSE	205	185	0.902439	32	2	0.0625
3	146544555	-	PLSCR1	TRUE	515	484	0.939806	32	2	0.0625
6	7313120	-	SSR1	FALSE	164	153	0.932927	32	2	0.0625
9	125241372	-	HSPA5	FALSE	945	908	0.960847	32	2	0.0625
19	18386158	+	GDF15	TRUE	97	89	0.917526	32	2	0.0625
3	32502839	-	CMTM6	FALSE	995	946	0.950754	32	2	0.0625
3	195543260	-	PPP1R2	FALSE	107	96	0.897196	32	2	0.0625
19	46850863	-	AP2S1	FALSE	514	500	0.972763	48	3	0.0625
5	103120350	+	PPIP5K2	FALSE	532	457	0.859023	32	2	0.0625
16	74296826	+	PSMD7	FALSE	381	266	0.698163	32	2	0.0625
12	52949925	-	KRT8	FALSE	28	22	0.785714	32	2	0.0625
1	32651217	+	RBBP4	TRUE	260	241	0.926923	32	2	0.0625
3	49358289	-	GPX1	FALSE	666	641	0.962462	32	2	0.0625
5	35617895	+	SPEF2	FALSE	445	430	0.966292	48	3	0.0625
17	49413267	-	PHB1	FALSE	56	3	0.0535714	48	3	0.0625
1	110407616	-	LAMTOR5	FALSE	83	36	0.433735	32	2	0.0625
21	32393005	-	URB1	FALSE	401	375	0.935162	209	13	0.062201
5	40834598	-	RPL37	FALSE	91	12	0.131868	49	3	0.0612245
12	123671113	+	TCTN2	TRUE	461	445	0.965293	98	6	0.0612245
3	108589708	+	DZIP3	FALSE	215	132	0.613953	49	3	0.0612245
12	84912793	-	SLC6A15	TRUE	851	806	0.947121	98	6	0.0612245
15	55196880	-	RSL24D1	FALSE	91	67	0.736264	49	3	0.0612245
12	49131377	-	TUBA1B	FALSE	287	159	0.554007	49	3	0.0612245
12	56158385	+	MYL6	FALSE	2142	1942	0.906629	82	5	0.0609756
12	123633860	+	GTF2H3	FALSE	238	194	0.815126	115	7	0.0608696
8	124539056	-	TATDN1	TRUE	3045	2859	0.938916	704	46	0.0608481
X	13734748	+	OFD1	TRUE	185	165	0.891892	33	2	0.0606061
11	74988920	+	NEU3	FALSE	280	270	0.964286	33	2	0.0606061
8	96235530	-	UQCRB	FALSE	116	34	0.293103	33	2	0.0606061
6	32968562	+	BRD2	FALSE	56	47	0.839286	33	2	0.0606061
8	119855863	-	DSCC1	FALSE	429	403	0.939394	33	2	0.0606061
5	10250277	+	CCT5	FALSE	270	216	0.8	66	4	0.0606061
3	132659841	-	ACAD11	FALSE	129	124	0.96124	33	2	0.0606061
12	54016895	+	HOXC4	FALSE	358	346	0.96648	33	2	0.0606061
1	156213060	+	PMF1	FALSE	39	10	0.25641	33	2	0.0606061
1	32650966	-	ZBTB8OS	FALSE	90	81	0.9	33	2	0.0606061
17	79839471	-	CBX4	FALSE	296	268	0.905405	33	2	0.0606061
1	246566224	-	TFB2M	FALSE	145	130	0.896552	33	2	0.0606061
17	78840814	-	USP36	TRUE	174	153	0.87931	33	2	0.0606061
6	81752710	-	TENT5A	FALSE	657	592	0.901065	33	2	0.0606061
19	19516239	+	NDUFA13	FALSE	328	270	0.823171	33	2	0.0606061
8	17922991	+	PCM1	FALSE	345	316	0.915942	33	2	0.0606061
16	69762359	+	WWP2	FALSE	96	86	0.895833	33	2	0.0606061
3	48662888	-	CELSR3	FALSE	76	74	0.973684	33	2	0.0606061
19	36014212	-	ALKBH6	TRUE	236	222	0.940678	33	2	0.0606061
3	149658041	-	WWTR1	TRUE	179	165	0.921788	33	2	0.0606061
3	69200582	-	FRMD4B	FALSE	81	69	0.851852	33	2	0.0606061
1	205750280	-	NUCKS1	FALSE	181	169	0.933702	33	2	0.0606061
2	74147874	-	BOLA3	FALSE	1178	932	0.791171	165	10	0.0606061
19	57435343	+	ZNF749	TRUE	1310	1146	0.874809	629	41	0.0603389
12	93441920	-	UBE2N	FALSE	2933	2826	0.963519	83	5	0.060241
4	56387461	-	AASDH	FALSE	765	738	0.964706	50	3	0.06
20	57266641	-	BMP7	TRUE	552	535	0.969203	50	3	0.06
6	44387735	+	CDC5L	FALSE	99	11	0.111111	50	3	0.06
11	61429920	-	CPSF7	TRUE	143	127	0.888112	50	3	0.06
6	10694968	+	PAK1IP1	FALSE	199	151	0.758794	67	4	0.0597015
1	114757960	-	CSDE1	FALSE	903	703	0.778516	236	14	0.059322
12	132710799	+	PGAM5	FALSE	220	212	0.963636	34	2	0.0588235
X	77899516	+	COX7B	FALSE	223	145	0.650224	34	2	0.0588235
4	83012933	-	LIN54	FALSE	111	92	0.828829	34	2	0.0588235
19	12669703	+	WDR83	FALSE	205	192	0.936585	34	2	0.0588235
12	122422550	-	CLIP1	FALSE	64	59	0.921875	34	2	0.0588235
11	60842107	+	CCDC86	FALSE	172	150	0.872093	34	2	0.0588235
18	2571503	-	METTL4	FALSE	95	79	0.831579	34	2	0.0588235
7	158829509	-	ESYT2	TRUE	442	428	0.968326	34	2	0.0588235
2	73780056	-	DUSP11	FALSE	81	67	0.82716	34	2	0.0588235
X	101390936	+	RPL36A	FALSE	271	252	0.929889	51	3	0.0588235
14	103562655	-	BAG5	FALSE	95	78	0.821053	34	2	0.0588235
11	13668718	+	FAR1	FALSE	337	284	0.84273	34	2	0.0588235
12	12813432	+	DDX47	FALSE	35	1	0.0285714	34	2	0.0588235
14	102592655	+	RCOR1	FALSE	285	274	0.961404	34	2	0.0588235
9	128689268	+	SET	FALSE	310	272	0.877419	34	2	0.0588235
15	37100547	-	MEIS2	FALSE	341	311	0.912023	34	2	0.0588235
5	138213294	-	CDC23	FALSE	80	36	0.45	34	2	0.0588235
9	110256520	-	TXN	FALSE	304	210	0.690789	51	3	0.0588235
13	21140540	+	SAP18	FALSE	255	248	0.972549	34	2	0.0588235
12	55728985	-	CD63	FALSE	825	784	0.950303	34	2	0.0588235
15	65792097	-	DENND4A	FALSE	68	65	0.955882	34	2	0.0588235
19	18573305	+	UBA52	FALSE	63	0	0	34	2	0.0588235
15	68820838	-	ANP32A	FALSE	132	85	0.643939	34	2	0.0588235
19	10315996	-	FDX2	TRUE	173	145	0.83815	68	4	0.0588235
1	234373460	+	COA6	FALSE	1389	1305	0.939525	51	3	0.0588235
16	30558338	-	ZNF764	FALSE	118	111	0.940678	34	2	0.0588235
7	45111697	-	TBRG4	TRUE	2396	2210	0.889352	310	26	0.0580769
4	112637174	+	LARP7	FALSE	4038	3947	0.977464	69	4	0.057971
18	49492495	-	RPL17	FALSE	403	303	0.751861	69	4	0.057971
17	59155179	-	SKA2	FALSE	978	934	0.95501	69	4	0.057971
7	2354827	+	EIF3B	TRUE	807	719	0.890954	259	15	0.0579151
1	175023413	-	MRPS14	FALSE	378	349	0.92328	52	3	0.0576923
16	89560654	+	RPL13	FALSE	654	644	0.984709	52	3	0.0576923
22	24556054	+	ENSG00000286070	FALSE	227	5	0.0220264	52	3	0.0576923
8	70669156	-	LACTB2	FALSE	636	613	0.963836	52	3	0.0576923
16	4847268	-	GLYR1	FALSE	73	53	0.726027	52	3	0.0576923
X	130401973	+	RBMX2	FALSE	551	515	0.934664	87	5	0.0574713
8	67062126	-	COPS5	FALSE	1331	1246	0.936138	157	9	0.0573248
6	136250293	-	MTFR2	FALSE	296	276	0.932432	35	2	0.0571429
19	40090913	-	ZNF780A	FALSE	495	475	0.959596	35	2	0.0571429
9	126805033	+	ZBTB43	TRUE	443	412	0.930023	35	2	0.0571429
2	174395679	-	CIR1	FALSE	102	73	0.715686	35	2	0.0571429
8	122781655	+	ZHX2	TRUE	107	94	0.878505	35	2	0.0571429
4	99950266	-	H2AZ1	FALSE	156	31	0.198718	35	2	0.0571429
1	120176509	-	SEC22B	FALSE	414	345	0.833333	35	2	0.0571429
11	63974634	+	COX8A	FALSE	240	222	0.925	35	2	0.0571429
3	87227301	+	CHMP2B	FALSE	231	154	0.666667	35	2	0.0571429
1	156728881	+	METTL25B	FALSE	84	82	0.97619	35	2	0.0571429
16	67666740	-	ENKD1	FALSE	307	298	0.970684	35	2	0.0571429
3	52278361	-	WDR82	FALSE	207	195	0.942029	70	4	0.0571429
5	138332151	+	FAM53C	FALSE	218	214	0.981651	35	2	0.0571429
12	107685782	+	PWP1	FALSE	532	512	0.962406	70	4	0.0571429
9	86282575	-	ISCA1	FALSE	926	902	0.974082	35	2	0.0571429
7	139231249	+	UBN2	FALSE	996	914	0.917671	210	12	0.0571429
19	9584539	-	ZNF121	FALSE	83	78	0.939759	35	2	0.0571429
X	119943673	-	NKAP	FALSE	611	595	0.973813	35	2	0.0571429
22	23894493	+	MIF	FALSE	152	3	0.0197368	35	2	0.0571429
18	35241036	+	ZNF397	TRUE	369	353	0.95664	106	6	0.0566038
1	153627533	-	S100A13	FALSE	1293	1240	0.95901	106	6	0.0566038
17	59892941	-	TUBD1	TRUE	462	414	0.896104	53	3	0.0566038
11	62856139	+	SLC3A2	FALSE	267	245	0.917603	106	6	0.0566038
X	44542832	-	FUNDC1	FALSE	1111	1009	0.908191	142	8	0.056338
10	102502718	-	ACTR1A	FALSE	588	556	0.945578	89	5	0.0561798
15	66702236	+	SMAD6	TRUE	483	448	0.927536	89	5	0.0561798
X	77895431	-	MAGT1	TRUE	1406	1352	0.961593	322	18	0.0559006
16	31508373	-	RUSF1	FALSE	95	85	0.894737	36	2	0.0555556
10	99732075	-	COX15	FALSE	68	58	0.852941	36	2	0.0555556
10	63133309	+	NRBF2	FALSE	372	293	0.787634	36	2	0.0555556
19	7943674	-	TIMM44	FALSE	135	110	0.814815	36	2	0.0555556
12	49018763	-	PRKAG1	FALSE	310	277	0.893548	36	2	0.0555556
2	170929272	+	GORASP2	FALSE	349	338	0.968481	36	2	0.0555556
1	42658447	+	PPIH	TRUE	581	519	0.893287	198	11	0.0555556
3	49094061	-	QRICH1	FALSE	395	304	0.76962	36	2	0.0555556
11	65858206	-	CFL1	FALSE	1479	1448	0.97904	72	4	0.0555556
10	84139570	+	GHITM	FALSE	221	74	0.334842	36	2	0.0555556
1	50970223	+	CDKN2C	FALSE	687	602	0.876274	54	3	0.0555556
17	47941600	+	PNPO	FALSE	1061	1016	0.957587	36	2	0.0555556
12	124914597	-	UBC	FALSE	22	5	0.227273	36	2	0.0555556
12	49188997	-	TUBA1A	FALSE	657	647	0.984779	36	2	0.0555556
1	120176515	-	SEC22B	FALSE	3125	3073	0.98336	108	6	0.0555556
17	16217227	+	PIGL	FALSE	96	77	0.802083	36	2	0.0555556
18	28177022	-	CDH2	FALSE	137	123	0.89781	36	2	0.0555556
4	67545470	-	CENPC	FALSE	341	313	0.917889	36	2	0.0555556
16	53586	-	POLR3K	FALSE	550	507	0.921818	145	8	0.0551724
17	59155750	+	PRR11	FALSE	645	518	0.803101	109	6	0.0550459
12	54000143	+	HOXC9	FALSE	652	566	0.868098	109	6	0.0550459
3	33798626	+	PDCD6IP	FALSE	861	843	0.979094	55	3	0.0545455
9	33473924	-	NOL6	TRUE	632	616	0.974684	55	3	0.0545455
X	154398270	+	RPL10	FALSE	1176	1104	0.938776	110	6	0.0545455
2	153478665	-	RPRM	FALSE	211	193	0.914692	55	3	0.0545455
4	17577437	+	LAP3	FALSE	790	749	0.948101	55	3	0.0545455
3	107522976	+	BBX	FALSE	1731	1499	0.865973	110	6	0.0545455
20	23637977	-	CST3	FALSE	612	600	0.980392	55	3	0.0545455
8	6406668	+	MCPH1	FALSE	238	206	0.865546	92	5	0.0543478
3	138115808	-	DZIP1L	FALSE	259	239	0.92278	37	2	0.0540541
22	29767423	+	UQCR10	FALSE	89	7	0.0786517	37	2	0.0540541
1	241848157	+	EXO1	FALSE	1150	1091	0.948696	74	4	0.0540541
19	44356680	-	ZNF112	TRUE	291	287	0.986254	37	2	0.0540541
1	112936016	-	SLC16A1	FALSE	43	42	0.976744	37	2	0.0540541
7	27740175	+	TAX1BP1	FALSE	267	247	0.925094	37	2	0.0540541
14	44961945	-	KLHL28	FALSE	323	305	0.944272	37	2	0.0540541
11	118572389	+	ARCN1	FALSE	278	268	0.964029	37	2	0.0540541
7	100049795	+	ZSCAN21	FALSE	200	173	0.865	37	2	0.0540541
21	32279015	-	MIS18A	FALSE	267	222	0.831461	37	2	0.0540541
1	206612442	-	EIF2D	FALSE	273	254	0.930403	74	4	0.0540541
5	146182564	-	LARS1	FALSE	20	11	0.55	37	2	0.0540541
4	99950218	-	H2AZ1	FALSE	73	5	0.0684932	93	5	0.0537634
19	49813243	-	FUZ	FALSE	55	49	0.890909	56	3	0.0535714
1	28236189	+	ATP5IF1	FALSE	294	257	0.87415	56	3	0.0535714
17	49414886	-	PHB1	FALSE	732	712	0.972678	56	3	0.0535714
1	112619837	+	CAPZA1	FALSE	981	888	0.905199	56	3	0.0535714
14	23034881	-	PSMB5	FALSE	229	141	0.615721	56	3	0.0535714
20	25390817	-	ABHD12	FALSE	425	398	0.936471	75	4	0.0533333
6	36986173	-	MTCH1	TRUE	724	687	0.948895	75	4	0.0533333
3	119469006	+	POGLUT1	FALSE	585	566	0.967521	75	4	0.0533333
1	86914111	-	SELENOF	FALSE	880	763	0.867045	170	9	0.0529412
2	24047381	-	WDCP	FALSE	1040	943	0.906731	170	9	0.0529412
4	82900533	-	SEC31A	FALSE	291	261	0.896907	170	9	0.0529412
21	46184427	-	SPATC1L	FALSE	531	488	0.919021	38	2	0.0526316
11	46617575	+	ATG13	FALSE	305	276	0.904918	38	2	0.0526316
X	47218712	+	CDK16	FALSE	517	463	0.895551	114	6	0.0526316
6	693108	-	EXOC2	TRUE	449	418	0.930958	38	2	0.0526316
11	66268639	+	RAB1B	TRUE	742	732	0.986523	38	2	0.0526316
2	95402694	+	FAHD2A	FALSE	455	431	0.947253	57	3	0.0526316
22	21629999	-	YDJC	FALSE	489	458	0.936605	57	3	0.0526316
1	151281547	+	ZNF687	FALSE	94	92	0.978723	38	2	0.0526316
1	168179012	+	TIPRL	FALSE	318	287	0.902516	38	2	0.0526316
22	39014239	+	APOBEC3C	FALSE	567	545	0.961199	38	2	0.0526316
19	12669753	+	WDR83	FALSE	263	248	0.942966	38	2	0.0526316
6	26103972	+	H4C3	FALSE	55	2	0.0363636	38	2	0.0526316
14	49620583	-	RPL36AL	FALSE	174	118	0.678161	38	2	0.0526316
5	95554995	-	SKIC3	FALSE	351	324	0.923077	38	2	0.0526316
7	99325954	+	ARPC1A	FALSE	272	264	0.970588	57	3	0.0526316
20	2470752	-	SNRPB	FALSE	870	661	0.75977	38	2	0.0526316
19	39125801	+	PAK4	FALSE	461	430	0.932755	57	3	0.0526316
5	138331734	-	CDC25C	FALSE	196	180	0.918367	38	2	0.0526316
19	34677698	+	ZNF302	FALSE	551	511	0.927405	76	4	0.0526316
19	1438359	+	RPS15	FALSE	1946	1852	0.951696	229	9	0.0525858
5	103120322	+	PPIP5K2	FALSE	3415	3066	0.897804	379	18	0.0522776
14	21456044	-	CHD8	FALSE	452	429	0.949115	115	6	0.0521739
13	27251338	+	RPL21	FALSE	520	343	0.659615	77	4	0.0519481
11	61333240	+	TKFC	TRUE	1168	1128	0.965753	77	4	0.0519481
19	572625	+	BSG	FALSE	73	23	0.315068	58	3	0.0517241
7	118184132	+	LSM8	FALSE	998	963	0.96493	58	3	0.0517241
4	121870450	-	BBS7	TRUE	247	230	0.931174	58	3	0.0517241
20	35411963	-	UQCC1	TRUE	100	83	0.83	58	3	0.0517241
11	65122108	-	FAU	FALSE	615	575	0.934959	58	3	0.0517241
17	42423256	-	CAVIN1	TRUE	1398	1332	0.95279	213	11	0.0516432
6	26103985	+	H4C3	FALSE	77	3	0.038961	97	5	0.0515464
4	87422601	+	NUDT9	FALSE	1245	814	0.653815	97	5	0.0515464
16	23678908	+	PLK1	FALSE	189	162	0.857143	39	2	0.0512821
12	6534540	+	GAPDH	FALSE	542	503	0.928044	39	2	0.0512821
6	53545101	-	GCLC	TRUE	524	444	0.847328	39	2	0.0512821
7	100612168	+	MOSPD3	FALSE	933	890	0.953912	78	4	0.0512821
14	103921507	-	ATP5MJ	FALSE	311	269	0.864952	78	4	0.0512821
10	86521762	-	WAPL	FALSE	411	384	0.934307	39	2	0.0512821
15	40569320	+	RPUSD2	FALSE	62	58	0.935484	39	2	0.0512821
7	10940150	-	NDUFA4	FALSE	343	285	0.830904	78	4	0.0512821
12	110468781	+	FAM216A	TRUE	1208	1140	0.943709	39	2	0.0512821
14	24232876	+	GMPR2	FALSE	348	336	0.965517	39	2	0.0512821
7	30594939	+	GARS1	FALSE	104	92	0.884615	39	2	0.0512821
8	119832839	-	TAF2	FALSE	202	164	0.811881	39	2	0.0512821
12	54037860	+	HOXC4	FALSE	67	54	0.80597	39	2	0.0512821
10	49942073	+	TIMM23B	FALSE	159	130	0.81761	39	2	0.0512821
17	41688949	+	EIF1	FALSE	67	1	0.0149254	39	2	0.0512821
11	111871517	-	ALG9	FALSE	172	163	0.947674	39	2	0.0512821
5	136132939	+	SMAD5	FALSE	199	182	0.914573	39	2	0.0512821
11	17277023	+	NUCB2	TRUE	453	441	0.97351	39	2	0.0512821
17	67717965	+	NOL11	FALSE	114	10	0.0877193	39	2	0.0512821
19	40750899	+	SNRPA	FALSE	242	234	0.966942	39	2	0.0512821
17	58692593	+	RAD51C	TRUE	202	199	0.985149	39	2	0.0512821
1	230978847	-	TTC13	FALSE	453	433	0.95585	39	2	0.0512821
4	145098285	+	ABCE1	FALSE	747	701	0.93842	157	8	0.0509554
6	43477592	+	TJAP1	FALSE	168	137	0.815476	59	3	0.0508475
22	29767424	+	UQCR10	FALSE	200	10	0.05	59	3	0.0508475
7	56051792	+	CCT6A	FALSE	1553	1414	0.910496	59	3	0.0508475
1	219613105	-	ZC3H11B	TRUE	212	195	0.919811	59	3	0.0508475
4	151760983	-	GATB	FALSE	403	349	0.866005	79	4	0.0506329
16	82170224	-	MPHOSPH6	TRUE	1602	1512	0.94382	79	4	0.0506329
2	55519637	+	CFAP36	FALSE	990	929	0.938384	139	7	0.0503597
14	99481417	+	CCNK	FALSE	3681	3520	0.949652	724	43	0.0500559
16	46689183	-	VPS35	FALSE	118	114	0.966102	20	1	0.05
8	144509077	+	MFSD3	FALSE	125	73	0.584	20	1	0.05
19	8514164	-	ZNF414	TRUE	207	199	0.961353	20	1	0.05
3	51500035	-	DCAF1	FALSE	197	190	0.964467	20	1	0.05
2	3519530	-	ADI1	FALSE	294	243	0.826531	20	1	0.05
9	79571961	+	TLE4	FALSE	137	108	0.788321	20	1	0.05
3	51983524	+	ACY1	FALSE	141	133	0.943262	20	1	0.05
11	61361840	-	CYB561A3	TRUE	117	102	0.871795	40	2	0.05
2	70994757	-	ENSG00000258881	FALSE	96	82	0.854167	80	4	0.05
2	127526437	-	IWS1	FALSE	78	68	0.871795	20	1	0.05
11	66856568	+	LRFN4	FALSE	55	52	0.945455	40	2	0.05
4	90127468	+	CCSER1	FALSE	78	68	0.871795	20	1	0.05
1	44739884	+	KIF2C	FALSE	58	51	0.87931	20	1	0.05
11	18396362	+	LDHA	FALSE	59	57	0.966102	20	1	0.05
16	19718171	-	KNOP1	FALSE	80	31	0.3875	20	1	0.05
3	49007364	+	WDR6	FALSE	142	135	0.950704	20	1	0.05
9	17135040	+	CNTLN	TRUE	379	366	0.965699	60	3	0.05
4	55853675	+	EXOC1	TRUE	145	134	0.924138	40	2	0.05
15	89912990	-	ARPIN	FALSE	100	91	0.91	20	1	0.05
2	64144420	-	PELI1	TRUE	483	461	0.954451	20	1	0.05
6	28141898	+	ZKSCAN8	FALSE	84	76	0.904762	20	1	0.05
16	11851508	-	RSL1D1	TRUE	89	5	0.0561798	20	1	0.05
3	87227302	+	CHMP2B	TRUE	113	77	0.681416	20	1	0.05
X	71533112	+	OGT	FALSE	428	370	0.864486	20	1	0.05
11	27363208	-	CCDC34	FALSE	108	95	0.87963	20	1	0.05
17	75878581	-	TRIM47	TRUE	209	193	0.923445	20	1	0.05
6	107459539	-	PDSS2	FALSE	128	110	0.859375	40	2	0.05
16	1972085	+	TBL3	FALSE	114	106	0.929825	20	1	0.05
17	63600869	+	TACO1	FALSE	310	292	0.941935	20	1	0.05
1	84574448	-	CTBS	FALSE	207	202	0.975845	40	2	0.05
4	82430665	+	ENOPH1	FALSE	362	343	0.947514	20	1	0.05
22	17638736	+	BCL2L13	FALSE	221	212	0.959276	20	1	0.05
6	121435735	+	GJA1	FALSE	236	214	0.90678	20	1	0.05
11	103092105	-	DCUN1D5	FALSE	502	478	0.952191	20	1	0.05
3	47282787	-	KIF9	FALSE	593	543	0.915683	60	3	0.05
7	100101363	-	MCM7	FALSE	356	330	0.926966	20	1	0.05
8	143815366	-	SCRIB	FALSE	99	87	0.878788	40	2	0.05
14	102139893	+	WDR20	TRUE	630	601	0.953968	20	1	0.05
1	186828990	+	PLA2G4A	FALSE	453	434	0.958057	20	1	0.05
20	63865237	+	TPD52L2	FALSE	545	511	0.937615	20	1	0.05
5	139648321	+	CXXC5	FALSE	245	242	0.987755	20	1	0.05
10	87094085	-	GLUD1	FALSE	23	21	0.913043	20	1	0.05
10	78029497	-	POLR3A	FALSE	123	66	0.536585	20	1	0.05
18	62187277	+	RELCH	FALSE	295	259	0.877966	20	1	0.05
13	106568155	-	ARGLU1	FALSE	204	155	0.759804	40	2	0.05
3	140941862	+	SLC25A36	FALSE	168	161	0.958333	20	1	0.05
10	63269017	-	JMJD1C	FALSE	31	28	0.903226	20	1	0.05
3	13420282	-	NUP210	FALSE	80	77	0.9625	20	1	0.05
10	100529860	-	NDUFB8	FALSE	317	244	0.769716	20	1	0.05
5	134525670	+	JADE2	TRUE	122	110	0.901639	20	1	0.05
3	183697806	+	YEATS2	FALSE	185	180	0.972973	20	1	0.05
1	225653103	-	ENAH	FALSE	115	109	0.947826	20	1	0.05
5	134176972	-	SKP1	FALSE	1530	1521	0.994118	60	3	0.05
6	75243736	-	COX7A2	FALSE	38	2	0.0526316	40	2	0.05
14	20990019	+	METTL17	FALSE	131	106	0.80916	20	1	0.05
3	142889192	-	PCOLCE2	FALSE	301	290	0.963455	20	1	0.05
15	48331427	+	DUT	FALSE	584	565	0.967466	40	2	0.05
11	75399546	+	RPS3	FALSE	159	100	0.628931	20	1	0.05
X	154411533	+	TAFAZZIN	FALSE	89	87	0.977528	20	1	0.05
1	15847859	+	SPEN	FALSE	813	743	0.913899	20	1	0.05
14	23567507	-	AP1G2	FALSE	61	54	0.885246	20	1	0.05
9	98056741	+	NANS	FALSE	98	83	0.846939	20	1	0.05
22	21567714	+	UBE2L3	TRUE	509	484	0.950884	20	1	0.05
1	38012739	+	UTP11	FALSE	183	167	0.912568	20	1	0.05
2	11466149	-	E2F6	FALSE	138	126	0.913043	40	2	0.05
X	101408199	+	HNRNPH2	FALSE	1404	1326	0.944444	140	7	0.05
5	149960729	+	SLC26A2	FALSE	349	335	0.959885	20	1	0.05
10	42782813	+	BMS1	FALSE	81	58	0.716049	20	1	0.05
12	55716034	+	ENSG00000258311	FALSE	854	840	0.983607	20	1	0.05
7	35254087	-	TBX20	FALSE	70	63	0.9	20	1	0.05
10	71851244	-	PSAP	FALSE	54	35	0.648148	20	1	0.05
5	140647819	+	IK	FALSE	628	592	0.942675	40	2	0.05
1	117929600	-	GDAP2	FALSE	90	87	0.966667	20	1	0.05
1	165768830	-	TMCO1	FALSE	53	42	0.792453	20	1	0.05
X	147911951	+	FMR1	TRUE	682	640	0.938416	20	1	0.05
5	132557005	+	RAD50	FALSE	89	77	0.865169	20	1	0.05
1	201955531	+	TIMM17A	FALSE	192	73	0.380208	40	2	0.05
X	47233823	+	USP11	FALSE	103	97	0.941748	20	1	0.05
12	132144458	+	NOC4L	FALSE	65	58	0.892308	20	1	0.05
1	205750250	-	NUCKS1	FALSE	80	68	0.85	20	1	0.05
1	207053248	+	PFKFB2	FALSE	258	246	0.953488	20	1	0.05
6	33272116	+	RPS18	FALSE	299	280	0.936455	20	1	0.05
12	123458205	+	SNRNP35	FALSE	41	39	0.95122	20	1	0.05
14	67816580	-	ZFYVE26	TRUE	80	71	0.8875	20	1	0.05
8	79767807	-	HEY1	FALSE	182	134	0.736264	20	1	0.05
6	34696767	-	ILRUN	TRUE	153	151	0.986928	20	1	0.05
17	58007236	-	SRSF1	FALSE	96	16	0.166667	20	1	0.05
19	57351282	+	ZNF304	FALSE	64	58	0.90625	20	1	0.05
17	19378498	+	MAPK7	TRUE	152	142	0.934211	20	1	0.05
19	52269595	+	ZNF766	FALSE	99	92	0.929293	20	1	0.05
12	110468855	+	FAM216A	FALSE	199	184	0.924623	20	1	0.05
2	177552796	-	IFT70B	TRUE	421	410	0.973872	20	1	0.05
6	37499870	-	CCDC167	FALSE	799	776	0.971214	20	1	0.05
7	129952924	-	UBE2H	FALSE	43	38	0.883721	20	1	0.05
7	128862849	+	ATP6V1F	FALSE	176	161	0.914773	20	1	0.05
1	156767580	+	PRCC	FALSE	185	145	0.783784	40	2	0.05
22	23894370	+	MIF	FALSE	639	563	0.881064	40	2	0.05
6	31972344	+	STK19	FALSE	71	67	0.943662	20	1	0.05
6	39934473	-	MOCS1	FALSE	45	42	0.933333	20	1	0.05
14	52707178	+	PSMC6	TRUE	899	859	0.955506	40	2	0.05
16	71895552	+	IST1	FALSE	52	37	0.711538	20	1	0.05
21	36060314	-	SETD4	FALSE	287	276	0.961672	20	1	0.05
12	103965882	+	TDG	FALSE	541	503	0.92976	20	1	0.05
17	48615257	-	HOXB8	FALSE	67	65	0.970149	40	2	0.05
14	73950287	+	COQ6	FALSE	95	91	0.957895	20	1	0.05
13	33818101	+	RFC3	FALSE	124	113	0.91129	20	1	0.05
X	40735579	-	MED14	FALSE	113	104	0.920354	20	1	0.05
7	127652187	+	SND1	FALSE	180	175	0.972222	60	3	0.05
X	51332829	+	NUDT10	FALSE	190	186	0.978947	20	1	0.05
22	43151547	+	TSPO	TRUE	528	516	0.977273	40	2	0.05
14	105419969	+	MTA1	FALSE	83	78	0.939759	20	1	0.05
15	40382974	+	KNSTRN	FALSE	627	606	0.966507	20	1	0.05
15	68820922	-	ANP32A	FALSE	354	339	0.957627	20	1	0.05
4	139084196	-	ELF2	FALSE	370	351	0.948649	40	2	0.05
19	45616057	-	EML2	FALSE	81	78	0.962963	20	1	0.05
16	84187033	-	TAF1C	TRUE	131	126	0.961832	20	1	0.05
2	24076285	-	SF3B6	FALSE	84	62	0.738095	20	1	0.05
15	65611182	-	INTS14	FALSE	420	401	0.954762	40	2	0.05
22	41621193	+	XRCC6	FALSE	114	109	0.95614	20	1	0.05
14	24232422	+	GMPR2	TRUE	106	100	0.943396	20	1	0.05
10	92593151	+	KIF11	FALSE	98	93	0.94898	20	1	0.05
3	121749649	-	GOLGB1	FALSE	294	281	0.955782	20	1	0.05
1	47314064	-	STIL	FALSE	263	226	0.859316	20	1	0.05
10	94362927	-	NOC3L	FALSE	163	142	0.871166	20	1	0.05
5	132777274	-	SEPTIN8	FALSE	260	208	0.8	20	1	0.05
X	101098190	+	CENPI	FALSE	345	325	0.942029	20	1	0.05
7	139231262	+	UBN2	FALSE	24	18	0.75	20	1	0.05
19	17267348	+	BABAM1	FALSE	262	253	0.965649	20	1	0.05
2	47176492	-	CALM2	FALSE	62	19	0.306452	20	1	0.05
7	133082030	-	CHCHD3	FALSE	164	128	0.780488	20	1	0.05
2	73234279	+	CCT7	FALSE	67	66	0.985075	40	2	0.05
1	53015009	+	SCP2	FALSE	383	364	0.950392	20	1	0.05
22	39502355	+	MIEF1	TRUE	213	193	0.906103	20	1	0.05
22	36481611	-	TXN2	FALSE	130	124	0.953846	20	1	0.05
7	141738421	+	SSBP1	FALSE	679	578	0.851252	20	1	0.05
3	40506082	+	ZNF620	FALSE	182	174	0.956044	40	2	0.05
8	41490562	+	GOLGA7	TRUE	1157	1099	0.94987	60	3	0.05
1	155688772	-	YY1AP1	FALSE	55	45	0.818182	20	1	0.05
4	121823866	-	CCNA2	FALSE	256	251	0.980469	20	1	0.05
2	71130222	-	MCEE	FALSE	83	18	0.216867	20	1	0.05
1	31297046	+	ZCCHC17	FALSE	157	147	0.936306	20	1	0.05
1	86914321	-	SELENOF	FALSE	101	71	0.70297	40	2	0.05
17	75261930	+	MRPS7	FALSE	63	34	0.539683	20	1	0.05
1	1399309	-	CCNL2	TRUE	75	33	0.44	20	1	0.05
17	50373258	+	EME1	FALSE	68	53	0.779412	20	1	0.05
16	83719406	+	HSBP1	FALSE	621	595	0.958132	60	3	0.05
12	7092536	-	C1R	FALSE	168	158	0.940476	20	1	0.05
16	83808022	+	HSBP1	FALSE	785	566	0.721019	60	3	0.05
1	6199587	-	RPL22	FALSE	484	271	0.559917	20	1	0.05
7	98252372	+	BRI3	FALSE	70	67	0.957143	20	1	0.05
20	49219431	+	DDX27	FALSE	96	90	0.9375	20	1	0.05
5	181243881	-	RACK1	TRUE	441	352	0.798186	40	2	0.05
18	21740786	+	MIB1	FALSE	113	94	0.831858	20	1	0.05
8	100150627	+	POLR2K	FALSE	240	232	0.966667	20	1	0.05
14	55271374	+	FBXO34	FALSE	267	261	0.977528	20	1	0.05
2	19990073	-	WDR35	FALSE	220	215	0.977273	40	2	0.05
5	50666952	+	PARP8	FALSE	109	103	0.944954	20	1	0.05
1	32222539	+	EIF3I	FALSE	63	1	0.015873	20	1	0.05
5	80654983	-	DHFR	TRUE	1066	1047	0.982176	40	2	0.05
8	98064600	+	ERICH5	FALSE	80	78	0.975	20	1	0.05
6	33272120	+	RPS18	FALSE	2288	1914	0.836538	180	9	0.0498002
5	138543238	-	ETF1	FALSE	3039	2909	0.957223	161	8	0.0496894
X	153794647	+	SSR4	FALSE	1713	1647	0.961471	222	11	0.0495495
X	23884031	-	APOO	FALSE	276	239	0.865942	222	11	0.0495495
22	38872216	-	CBX6	TRUE	5678	4744	0.827957	1822	91	0.0494621
2	110212525	-	MTLN	FALSE	1089	871	0.799816	325	19	0.0494557
1	74198135	-	LRRIQ3	FALSE	187	158	0.84492	81	4	0.0493827
12	56116609	+	RPL41	FALSE	883	862	0.976217	81	4	0.0493827
3	44761602	-	KIAA1143	FALSE	678	612	0.902655	61	3	0.0491803
X	129906187	+	UTP14A	FALSE	4917	4544	0.924141	306	15	0.0490196
12	74537827	+	ATXN7L3B	FALSE	404	371	0.918317	41	2	0.0487805
11	65122176	-	FAU	FALSE	1525	1453	0.952787	82	4	0.0487805
3	58433812	-	PDHB	FALSE	249	126	0.506024	41	2	0.0487805
8	70608319	-	TRAM1	FALSE	367	357	0.972752	41	2	0.0487805
12	50085236	+	SMARCD1	FALSE	860	831	0.966279	82	4	0.0487805
3	119677377	-	COX17	FALSE	127	74	0.582677	41	2	0.0487805
2	112275570	+	ZC3H6	FALSE	134	128	0.955224	41	2	0.0487805
1	31296791	-	SNRNP40	FALSE	493	386	0.782961	41	2	0.0487805
1	92832028	+	RPL5	FALSE	223	45	0.201794	41	2	0.0487805
17	19362721	-	B9D1	TRUE	1116	1087	0.974014	82	4	0.0487805
19	11346202	-	TMEM205	FALSE	106	103	0.971698	41	2	0.0487805
1	163322001	+	NUF2	FALSE	305	288	0.944262	41	2	0.0487805
2	117814727	+	DDX18	FALSE	209	178	0.851675	41	2	0.0487805
1	52055213	-	TXNDC12	FALSE	707	618	0.874116	41	2	0.0487805
X	136880753	-	RBMX	FALSE	233	211	0.905579	41	2	0.0487805
6	31862834	-	NEU1	FALSE	153	151	0.986928	41	2	0.0487805
1	23344249	-	HNRNPR	FALSE	606	535	0.882838	41	2	0.0487805
8	73294602	+	RDH10	TRUE	281	223	0.793594	41	2	0.0487805
2	196799674	-	GTF3C3	FALSE	273	249	0.912088	41	2	0.0487805
2	96266277	+	CIAO1	FALSE	302	297	0.983444	41	2	0.0487805
2	231708544	+	PTMA	FALSE	120	18	0.15	41	2	0.0487805
14	24442769	-	SDR39U1	FALSE	787	768	0.975858	247	12	0.048583
9	136791371	+	TMEM141	FALSE	1464	1384	0.945355	103	5	0.0485437
12	49752469	+	TMBIM6	FALSE	83	3	0.0361446	103	5	0.0485437
19	12734746	-	TRIR	FALSE	1028	980	0.953307	62	3	0.0483871
12	124914606	-	UBC	FALSE	253	235	0.928854	62	3	0.0483871
3	33097142	-	GLB1	TRUE	1124	1096	0.975089	62	3	0.0483871
3	9793108	+	ARPC4-TTLL3	FALSE	348	341	0.979885	83	4	0.0481928
7	92134474	-	CYP51A1	FALSE	1778	1681	0.945444	83	4	0.0481928
14	21269413	-	HNRNPC	FALSE	976	284	0.290984	166	8	0.0481928
X	103686651	-	MORF4L2	FALSE	202	24	0.118812	125	6	0.048
18	32092694	+	RNF138	FALSE	6442	5918	0.922561	773	29	0.0479806
4	99950235	-	H2AZ1	FALSE	157	11	0.0700637	146	7	0.0479452
7	151232499	+	CHPF2	FALSE	281	265	0.94306	42	2	0.047619
X	17737497	+	SCML1	FALSE	390	339	0.869231	42	2	0.047619
1	202808419	-	KDM5B	FALSE	219	211	0.96347	21	1	0.047619
17	81927670	-	MAFG	FALSE	66	59	0.893939	21	1	0.047619
8	22245393	+	POLR3D	FALSE	111	108	0.972973	21	1	0.047619
20	59007254	-	CTSZ	TRUE	77	75	0.974026	21	1	0.047619
18	26226451	+	TAF4B	FALSE	105	98	0.933333	21	1	0.047619
X	119236325	+	PGRMC1	FALSE	220	204	0.927273	21	1	0.047619
21	28885351	-	N6AMT1	FALSE	148	139	0.939189	21	1	0.047619
2	39121041	-	SOS1	FALSE	231	222	0.961039	21	1	0.047619
17	38748341	-	PCGF2	FALSE	91	87	0.956044	21	1	0.047619
13	95677218	+	DNAJC3	FALSE	68	61	0.897059	21	1	0.047619
16	19067608	+	COQ7	FALSE	214	186	0.869159	42	2	0.047619
1	23692644	+	RPL11	FALSE	53	2	0.0377358	21	1	0.047619
7	77798387	-	TMEM60	FALSE	79	62	0.78481	21	1	0.047619
16	28553944	+	SGF29	FALSE	114	90	0.789474	21	1	0.047619
1	109213986	+	SARS1	FALSE	27	4	0.148148	42	2	0.047619
19	58499245	-	SLC27A5	FALSE	748	726	0.970588	21	1	0.047619
1	146938545	+	NBPF12	FALSE	69	65	0.942029	21	1	0.047619
1	32292199	+	HDAC1	FALSE	21	2	0.0952381	21	1	0.047619
10	92574093	-	IDE	TRUE	638	511	0.80094	21	1	0.047619
7	128343900	-	RBM28	FALSE	95	85	0.894737	21	1	0.047619
7	73624522	-	MLXIPL	TRUE	168	161	0.958333	21	1	0.047619
7	44573901	-	DDX56	FALSE	182	174	0.956044	21	1	0.047619
10	102854256	+	BORCS7	FALSE	183	169	0.923497	21	1	0.047619
7	33062793	-	NT5C3A	FALSE	205	195	0.95122	42	2	0.047619
1	31296799	-	SNRNP40	FALSE	246	229	0.930894	21	1	0.047619
16	57462695	+	POLR2C	FALSE	402	389	0.967662	42	2	0.047619
2	74392001	-	DCTN1	FALSE	322	297	0.92236	21	1	0.047619
14	24442668	-	SDR39U1	FALSE	38	34	0.894737	21	1	0.047619
11	8682783	+	RPL27A	FALSE	550	480	0.872727	21	1	0.047619
6	31158612	+	TCF19	FALSE	565	517	0.915044	21	1	0.047619
7	122144291	-	AASS	FALSE	636	623	0.97956	21	1	0.047619
1	155241254	-	GBA1	FALSE	197	177	0.898477	21	1	0.047619
17	63842687	-	SMARCD2	FALSE	355	334	0.940845	21	1	0.047619
8	109644740	-	SYBU	FALSE	62	59	0.951613	21	1	0.047619
6	157323503	-	TMEM242	FALSE	192	150	0.78125	42	2	0.047619
17	49413266	-	PHB1	FALSE	30	4	0.133333	21	1	0.047619
X	103356496	+	TCEAL9	FALSE	87	43	0.494253	21	1	0.047619
18	41955255	+	PIK3C3	FALSE	78	69	0.884615	21	1	0.047619
1	155308870	+	FDPS	FALSE	616	581	0.943182	21	1	0.047619
20	18567459	+	ENSG00000284776	FALSE	76	52	0.684211	21	1	0.047619
1	236142553	+	GPR137B	FALSE	243	233	0.958848	21	1	0.047619
X	103356582	+	TCEAL9	FALSE	23	0	0	21	1	0.047619
1	112619835	+	CAPZA1	FALSE	965	764	0.79171	63	3	0.047619
17	7307566	+	EIF5A	FALSE	864	788	0.912037	63	3	0.047619
6	159762079	+	ACAT2	FALSE	297	267	0.89899	21	1	0.047619
3	155854401	-	SLC33A1	FALSE	34	14	0.411765	21	1	0.047619
20	38033744	+	RPRD1B	FALSE	57	47	0.824561	21	1	0.047619
21	46286708	+	YBEY	FALSE	45	39	0.866667	21	1	0.047619
17	4731475	+	MED11	FALSE	526	487	0.925856	21	1	0.047619
22	29581126	-	NIPSNAP1	FALSE	383	373	0.97389	21	1	0.047619
10	27154369	-	YME1L1	FALSE	293	288	0.982935	21	1	0.047619
6	31546590	-	ATP6V1G2-DDX39B	FALSE	582	562	0.965636	42	2	0.047619
X	101407929	-	GLA	FALSE	423	380	0.898345	21	1	0.047619
2	218270136	-	AAMP	FALSE	530	469	0.884906	42	2	0.047619
1	160262446	-	DCAF8	FALSE	78	63	0.807692	21	1	0.047619
6	3258952	+	PSMG4	TRUE	606	589	0.971947	42	2	0.047619
11	74171000	-	C2CD3	TRUE	96	84	0.875	21	1	0.047619
11	119067810	+	VPS11	FALSE	274	265	0.967153	21	1	0.047619
5	6713491	+	TENT4A	FALSE	149	133	0.892617	21	1	0.047619
14	58427120	-	TIMM9	FALSE	200	187	0.935	21	1	0.047619
5	76819031	+	F2RL1	FALSE	77	74	0.961039	21	1	0.047619
5	154755381	+	LARP1	FALSE	443	421	0.950339	21	1	0.047619
X	111681252	+	ALG13	FALSE	62	59	0.951613	21	1	0.047619
5	1799804	-	MRPL36	FALSE	80	54	0.675	21	1	0.047619
3	69085029	+	ARL6IP5	FALSE	911	629	0.69045	42	2	0.047619
1	220786873	+	MTARC1	FALSE	470	446	0.948936	21	1	0.047619
6	10412365	-	TFAP2A	FALSE	86	74	0.860465	21	1	0.047619
1	150364180	+	RPRD2	FALSE	184	81	0.440217	21	1	0.047619
5	69369969	-	TAF9	FALSE	114	88	0.77193	21	1	0.047619
2	10812740	-	PDIA6	FALSE	167	112	0.670659	42	2	0.047619
6	99425282	-	PNISR	FALSE	430	377	0.876744	21	1	0.047619
12	28190458	+	CCDC91	FALSE	85	78	0.917647	21	1	0.047619
3	96814594	+	EPHA6	TRUE	131	87	0.664122	21	1	0.047619
5	96936080	+	LNPEP	TRUE	268	256	0.955224	21	1	0.047619
3	53891800	-	SELENOK	FALSE	150	117	0.78	21	1	0.047619
3	129316266	-	H1-10	FALSE	176	158	0.897727	21	1	0.047619
4	151099574	+	RPS3A	FALSE	187	184	0.983957	21	1	0.047619
1	114581648	-	BCAS2	FALSE	765	705	0.921569	21	1	0.047619
5	169583778	+	SPDL1	FALSE	191	126	0.659686	21	1	0.047619
11	65122181	-	FAU	FALSE	267	244	0.913858	21	1	0.047619
17	75784870	+	UNK	FALSE	332	304	0.915663	21	1	0.047619
5	76716126	+	F2R	TRUE	180	173	0.961111	21	1	0.047619
1	88684345	+	PKN2	FALSE	357	333	0.932773	21	1	0.047619
4	6693878	+	S100P	TRUE	21	20	0.952381	42	2	0.047619
X	84502487	-	HDX	FALSE	101	92	0.910891	21	1	0.047619
X	47232977	+	USP11	FALSE	64	62	0.96875	21	1	0.047619
11	65262005	+	POLA2	FALSE	62	31	0.5	21	1	0.047619
X	72277227	-	RPS4X	FALSE	139	127	0.913669	21	1	0.047619
14	64914402	+	CHURC1	FALSE	115	111	0.965217	21	1	0.047619
2	241702047	+	ING5	FALSE	128	116	0.90625	21	1	0.047619
15	75903939	+	FBXO22	FALSE	629	587	0.933227	21	1	0.047619
2	85561496	-	GGCX	FALSE	178	174	0.977528	21	1	0.047619
7	140479172	-	MKRN1	FALSE	40	34	0.85	21	1	0.047619
11	78079763	-	NDUFC2-KCTD14	FALSE	215	206	0.95814	21	1	0.047619
12	112013456	+	ERP29	FALSE	34	30	0.882353	21	1	0.047619
15	75336005	+	COMMD4	FALSE	480	464	0.966667	21	1	0.047619
1	155934389	-	KHDC4	FALSE	151	133	0.880795	21	1	0.047619
11	82901644	-	PRCP	FALSE	504	478	0.948413	21	1	0.047619
17	82022915	-	CENPX	FALSE	229	220	0.960699	21	1	0.047619
12	96400439	-	CDK17	TRUE	196	184	0.938776	21	1	0.047619
X	49235500	+	CCDC22	FALSE	109	91	0.834862	21	1	0.047619
1	170074665	-	KIFAP3	FALSE	140	133	0.95	21	1	0.047619
3	120596425	+	NDUFB4	FALSE	597	564	0.944724	21	1	0.047619
4	103076332	-	SLC9B2	TRUE	239	230	0.962343	21	1	0.047619
1	173824727	+	DARS2	FALSE	89	67	0.752809	42	2	0.047619
5	132737527	-	KIF3A	FALSE	299	285	0.953177	42	2	0.047619
1	200410054	-	ZNF281	FALSE	94	38	0.404255	21	1	0.047619
11	130069884	+	APLP2	FALSE	141	135	0.957447	21	1	0.047619
6	26365231	+	BTN3A2	TRUE	145	131	0.903448	21	1	0.047619
2	112764638	-	CKAP2L	FALSE	473	432	0.913319	21	1	0.047619
X	48897760	-	TIMM17B	FALSE	144	139	0.965278	21	1	0.047619
3	99817915	+	CMSS1	FALSE	141	123	0.87234	21	1	0.047619
19	58327059	+	ZSCAN22	FALSE	37	31	0.837838	21	1	0.047619
1	25338329	+	TMEM50A	FALSE	1225	1166	0.951837	168	8	0.047619
19	45692695	+	QPCTL	FALSE	399	372	0.932331	21	1	0.047619
3	136752413	-	STAG1	FALSE	363	337	0.928375	21	1	0.047619
22	50261717	-	MAPK12	FALSE	180	178	0.988889	21	1	0.047619
12	52949842	-	KRT8	TRUE	32	31	0.96875	21	1	0.047619
5	138179172	+	KIF20A	FALSE	167	164	0.982036	21	1	0.047619
4	98261519	+	RAP1GDS1	FALSE	48	46	0.958333	21	1	0.047619
6	107958179	-	SEC63	FALSE	123	121	0.98374	21	1	0.047619
10	118342273	-	FAM204A	FALSE	268	165	0.615672	21	1	0.047619
12	21657786	-	LDHB	FALSE	263	163	0.619772	21	1	0.047619
14	24216063	-	MDP1	FALSE	263	249	0.946768	21	1	0.047619
11	14643761	+	PDE3B	FALSE	364	350	0.961538	21	1	0.047619
3	49940044	+	RBM6	FALSE	375	353	0.941333	21	1	0.047619
6	125153773	+	TPD52L1	TRUE	177	166	0.937853	21	1	0.047619
7	100148999	+	LAMTOR4	FALSE	64	58	0.90625	21	1	0.047619
13	109786627	-	IRS2	FALSE	43	39	0.906977	21	1	0.047619
6	122471798	-	SERINC1	FALSE	104	64	0.615385	21	1	0.047619
2	37324730	-	PRKD3	FALSE	604	567	0.938742	63	3	0.047619
1	156677407	-	NES	TRUE	161	151	0.937888	42	2	0.047619
11	78079847	-	NDUFC2-KCTD14	FALSE	219	134	0.611872	21	1	0.047619
9	78297150	+	PSAT1	FALSE	87	69	0.793103	21	1	0.047619
12	56224364	+	NABP2	FALSE	280	267	0.953571	21	1	0.047619
11	62856236	+	SLC3A2	FALSE	36	34	0.944444	21	1	0.047619
3	186806454	-	RFC4	FALSE	274	240	0.875912	21	1	0.047619
12	56116742	+	RPL41	FALSE	79	4	0.0506329	21	1	0.047619
16	2429447	+	CCNF	TRUE	135	131	0.97037	21	1	0.047619
17	54968646	-	COX11	FALSE	4376	4011	0.909326	581	33	0.0473639
10	3785237	-	KLF6	FALSE	242	194	0.801653	85	4	0.0470588
11	61392632	+	TMEM216	TRUE	713	666	0.934081	85	4	0.0470588
11	69641156	+	CCND1	TRUE	851	796	0.93537	64	3	0.046875
2	222298701	-	PAX3	FALSE	200	188	0.94	107	5	0.046729
7	42932193	-	PSMA2	FALSE	1110	1041	0.937838	107	5	0.046729
10	12196259	+	CDC123	FALSE	79	64	0.810127	43	2	0.0465116
9	125241342	-	HSPA5	TRUE	723	655	0.905947	43	2	0.0465116
15	35546144	-	DPH6	FALSE	171	165	0.964912	43	2	0.0465116
6	41787671	+	TOMM6	FALSE	1081	1043	0.964847	43	2	0.0465116
1	91500869	+	CDC7	FALSE	966	909	0.940994	43	2	0.0465116
20	3159832	-	FASTKD5	FALSE	128	120	0.9375	43	2	0.0465116
2	176002281	-	LNPK	FALSE	145	128	0.882759	43	2	0.0465116
2	197516084	+	MOB4	TRUE	503	472	0.93837	43	2	0.0465116
19	10315960	-	FDX2	FALSE	219	206	0.940639	43	2	0.0465116
X	101390958	+	RPL36A	FALSE	1649	1570	0.952092	215	10	0.0465116
X	101408181	+	HNRNPH2	FALSE	1107	1024	0.925023	43	2	0.0465116
6	134174864	-	SGK1	TRUE	375	357	0.952	43	2	0.0465116
17	42017813	-	DNAJC7	FALSE	210	209	0.995238	43	2	0.0465116
17	63774187	+	DDX42	FALSE	296	287	0.969595	43	2	0.0465116
12	34022478	+	ALG10	FALSE	201	191	0.950249	43	2	0.0465116
12	56688354	-	PTGES3	FALSE	940	887	0.943617	43	2	0.0465116
3	181711926	+	SOX2	FALSE	1026	808	0.787524	86	4	0.0465116
17	74203645	+	RPL38	FALSE	312	224	0.717949	43	2	0.0465116
17	42824258	-	BECN1	FALSE	412	378	0.917476	43	2	0.0465116
1	26306630	-	UBXN11	FALSE	94	78	0.829787	43	2	0.0465116
10	28532779	+	WAC	TRUE	104	96	0.923077	43	2	0.0465116
10	7788159	+	ATP5F1C	TRUE	1764	1676	0.950113	151	7	0.0463576
16	66552608	+	CKLF-CMTM1	FALSE	267	212	0.794007	65	3	0.0461538
2	61888602	-	CCT4	FALSE	1229	1030	0.83808	65	3	0.0461538
17	2511835	-	METTL16	TRUE	497	450	0.905433	65	3	0.0461538
3	120742520	-	RABL3	TRUE	559	521	0.932021	87	4	0.045977
12	120446409	-	TRIAP1	FALSE	1261	1220	0.967486	87	4	0.045977
X	149541004	+	EOLA1	FALSE	1961	1771	0.903111	87	4	0.045977
17	7687525	-	TP53	FALSE	512	448	0.875	87	4	0.045977
2	37196492	+	CEBPZOS	FALSE	618	588	0.951456	87	4	0.045977
17	81927735	-	MAFG	TRUE	966	891	0.92236	240	11	0.0458333
10	72626068	-	MICU1	FALSE	330	300	0.909091	131	6	0.0458015
14	73569309	+	ACOT2	FALSE	176	161	0.914773	22	1	0.0454545
20	38472843	+	RALGAPB	TRUE	450	431	0.957778	44	2	0.0454545
5	132866657	+	UQCRQ	TRUE	826	806	0.975787	44	2	0.0454545
11	119018379	-	RPS25	FALSE	452	412	0.911504	22	1	0.0454545
15	72783733	-	ADPGK	FALSE	714	568	0.795518	22	1	0.0454545
6	112087465	-	TUBE1	FALSE	171	168	0.982456	22	1	0.0454545
1	1471755	+	ATAD3B	FALSE	114	100	0.877193	22	1	0.0454545
17	5486533	+	MIS12	FALSE	155	150	0.967742	22	1	0.0454545
11	126211752	+	FAM118B	FALSE	378	365	0.965608	22	1	0.0454545
4	173334332	-	HMGB2	FALSE	257	144	0.560311	22	1	0.0454545
2	110212497	-	MTLN	FALSE	90	83	0.922222	22	1	0.0454545
2	63050851	+	OTX1	TRUE	88	71	0.806818	22	1	0.0454545
2	28894695	+	WDR43	FALSE	195	180	0.923077	22	1	0.0454545
15	76012424	-	NRG4	TRUE	365	342	0.936986	22	1	0.0454545
8	120445445	+	MTBP	FALSE	294	261	0.887755	22	1	0.0454545
4	26320800	+	RBPJ	FALSE	179	168	0.938547	22	1	0.0454545
7	112450479	+	ENSG00000288634	FALSE	29	6	0.206897	22	1	0.0454545
20	35284535	-	EIF6	FALSE	128	119	0.929688	66	3	0.0454545
7	100148983	+	LAMTOR4	FALSE	265	233	0.879245	44	2	0.0454545
17	37491547	+	DUSP14	FALSE	24	22	0.916667	44	2	0.0454545
17	48610977	-	HOXB7	FALSE	278	214	0.769784	22	1	0.0454545
17	44187232	+	TMUB2	FALSE	215	200	0.930233	22	1	0.0454545
17	81891580	-	ALYREF	FALSE	535	498	0.930841	22	1	0.0454545
3	172750788	+	ECT2	FALSE	197	146	0.741117	22	1	0.0454545
7	106112284	-	SYPL1	FALSE	127	107	0.84252	22	1	0.0454545
1	202808417	-	KDM5B	FALSE	111	102	0.918919	22	1	0.0454545
14	22929391	-	PRMT5	TRUE	370	348	0.940541	22	1	0.0454545
1	229626204	+	URB2	FALSE	177	169	0.954802	22	1	0.0454545
17	40647811	-	SMARCE1	FALSE	169	33	0.195266	22	1	0.0454545
1	27490187	-	WASF2	FALSE	57	50	0.877193	22	1	0.0454545
9	121201893	-	RAB14	FALSE	114	102	0.894737	22	1	0.0454545
17	16380779	+	UBB	FALSE	638	587	0.920063	44	2	0.0454545
15	44537091	+	EIF3J	FALSE	577	561	0.97227	22	1	0.0454545
22	36481631	-	TXN2	FALSE	868	851	0.980415	22	1	0.0454545
13	60163926	-	DIAPH3	FALSE	60	15	0.25	22	1	0.0454545
1	151909458	-	THEM4	FALSE	466	442	0.948498	22	1	0.0454545
3	142889186	-	PCOLCE2	FALSE	218	214	0.981651	22	1	0.0454545
14	22766716	+	OXA1L	FALSE	75	61	0.813333	22	1	0.0454545
14	23183660	-	SLC7A8	TRUE	796	721	0.905779	22	1	0.0454545
8	55773338	-	TMEM68	FALSE	42	37	0.880952	22	1	0.0454545
10	7411034	-	SFMBT2	TRUE	181	169	0.933702	22	1	0.0454545
20	43667083	+	MYBL2	FALSE	1189	1108	0.931876	110	5	0.0454545
6	151452108	-	RMND1	FALSE	95	90	0.947368	22	1	0.0454545
14	50312333	+	DMAC2L	FALSE	230	223	0.969565	22	1	0.0454545
13	49792682	-	KPNA3	TRUE	157	151	0.961783	22	1	0.0454545
1	236795321	+	MTR	FALSE	169	141	0.83432	44	2	0.0454545
X	154398948	+	RPL10	FALSE	247	227	0.919028	22	1	0.0454545
X	48521803	+	EBP	FALSE	573	541	0.944154	22	1	0.0454545
10	72216305	-	ASCC1	FALSE	397	383	0.964736	22	1	0.0454545
17	49678096	-	SPOP	FALSE	70	69	0.985714	22	1	0.0454545
17	56978105	+	SCPEP1	FALSE	286	278	0.972028	22	1	0.0454545
2	230068999	-	SLC16A14	FALSE	689	673	0.976778	22	1	0.0454545
12	122752881	+	DENR	FALSE	103	92	0.893204	22	1	0.0454545
2	19901984	-	TTC32	FALSE	545	492	0.902752	22	1	0.0454545
10	27240516	-	ACBD5	FALSE	110	102	0.927273	22	1	0.0454545
11	65333878	+	DPF2	FALSE	143	126	0.881119	22	1	0.0454545
19	50476848	-	GARIN5A	TRUE	40	39	0.975	22	1	0.0454545
1	31644870	-	PEF1	FALSE	966	929	0.961698	44	2	0.0454545
1	213015804	-	ANGEL2	FALSE	169	151	0.893491	22	1	0.0454545
11	63681452	+	RTN3	FALSE	103	96	0.932039	22	1	0.0454545
19	13116753	-	TRMT1	FALSE	30	28	0.933333	22	1	0.0454545
12	110468437	+	FAM216A	FALSE	206	180	0.873786	22	1	0.0454545
7	28409336	+	CREB5	FALSE	119	106	0.890756	22	1	0.0454545
1	44213463	+	DMAP1	FALSE	157	153	0.974522	22	1	0.0454545
22	23786963	+	SMARCB1	TRUE	291	280	0.962199	22	1	0.0454545
10	3172790	-	PITRM1	TRUE	174	168	0.965517	22	1	0.0454545
19	41439902	-	DMAC2	FALSE	41	32	0.780488	22	1	0.0454545
19	17337566	+	GTPBP3	FALSE	167	142	0.850299	22	1	0.0454545
7	42932161	-	PSMA2	FALSE	56	4	0.0714286	22	1	0.0454545
2	229921992	-	TRIP12	TRUE	323	292	0.904025	22	1	0.0454545
1	225924243	-	PYCR2	FALSE	60	50	0.833333	22	1	0.0454545
11	57761848	+	CTNND1	FALSE	129	117	0.906977	22	1	0.0454545
12	12611845	+	CREBL2	FALSE	213	197	0.924883	22	1	0.0454545
15	40161021	+	BUB1B	FALSE	241	221	0.917012	22	1	0.0454545
11	111879492	+	CFAP68	FALSE	143	119	0.832168	22	1	0.0454545
19	40690651	-	NUMBL	TRUE	70	69	0.985714	22	1	0.0454545
21	44339402	-	CFAP410	TRUE	302	287	0.950331	22	1	0.0454545
2	27370627	+	SNX17	FALSE	579	541	0.93437	22	1	0.0454545
2	63842441	+	UGP2	TRUE	151	142	0.940397	44	2	0.0454545
12	21654655	-	LDHB	FALSE	40	0	0	22	1	0.0454545
17	76738046	+	MFSD11	FALSE	134	125	0.932836	22	1	0.0454545
9	68780045	+	PABIR1	FALSE	217	207	0.953917	22	1	0.0454545
16	8868722	-	CARHSP1	FALSE	39	39	1	22	1	0.0454545
3	48685905	-	NCKIPSD	FALSE	148	142	0.959459	22	1	0.0454545
20	23350761	+	NXT1	FALSE	162	155	0.95679	22	1	0.0454545
1	42658459	+	PPIH	FALSE	25	3	0.12	22	1	0.0454545
12	68687011	+	NUP107	FALSE	155	126	0.812903	22	1	0.0454545
1	163321991	+	NUF2	FALSE	163	148	0.907975	22	1	0.0454545
11	3797898	+	PGAP2	TRUE	169	168	0.994083	22	1	0.0454545
X	16712930	-	CTPS2	FALSE	117	113	0.965812	22	1	0.0454545
10	110227097	+	MXI1	FALSE	35	35	1	22	1	0.0454545
3	9792701	-	TADA3	FALSE	157	152	0.968153	22	1	0.0454545
9	32573106	-	NDUFB6	FALSE	573	544	0.949389	88	4	0.0454545
6	122399625	+	HSF2	FALSE	133	115	0.864662	22	1	0.0454545
6	41921088	-	MED20	FALSE	38	18	0.473684	44	2	0.0454545
12	79935015	-	PPP1R12A	FALSE	51	45	0.882353	22	1	0.0454545
6	26103996	+	H4C3	FALSE	29	1	0.0344828	44	2	0.0454545
14	54441331	-	CNIH1	FALSE	143	138	0.965035	66	3	0.0454545
3	20186205	-	SGO1	FALSE	127	106	0.834646	44	2	0.0454545
13	29850578	-	UBL3	FALSE	252	238	0.944444	44	2	0.0454545
11	75399548	+	RPS3	FALSE	829	626	0.755127	66	3	0.0454545
7	13989666	-	ETV1	TRUE	190	173	0.910526	22	1	0.0454545
14	55051668	+	MAPK1IP1L	FALSE	81	71	0.876543	22	1	0.0454545
11	34916318	-	APIP	FALSE	243	232	0.954733	22	1	0.0454545
14	44962239	+	TOGARAM1	FALSE	122	119	0.97541	22	1	0.0454545
17	63550506	+	DCAF7	FALSE	56	54	0.964286	22	1	0.0454545
16	24539604	+	RBBP6	FALSE	973	926	0.951696	88	4	0.0454545
2	69893978	+	SNRNP27	FALSE	538	523	0.972119	22	1	0.0454545
X	115561184	+	PLS3	FALSE	283	247	0.872792	44	2	0.0454545
3	160399194	-	IFT80	FALSE	93	71	0.763441	22	1	0.0454545
3	52278625	-	WDR82	FALSE	85	66	0.776471	22	1	0.0454545
2	189784371	-	ORMDL1	FALSE	128	124	0.96875	22	1	0.0454545
19	37210476	-	ZNF585B	FALSE	27	26	0.962963	22	1	0.0454545
9	3525916	-	RFX3	FALSE	109	106	0.972477	22	1	0.0454545
13	49444234	+	SETDB2	FALSE	201	191	0.950249	22	1	0.0454545
19	45691934	-	SNRPD2	FALSE	3422	3405	0.995032	44	2	0.0454545
12	56221926	-	RNF41	FALSE	211	191	0.905213	22	1	0.0454545
2	27629056	+	GPN1	FALSE	200	155	0.775	22	1	0.0454545
1	86704897	+	SH3GLB1	FALSE	58	52	0.896552	22	1	0.0454545
5	160419075	-	SLU7	FALSE	24	12	0.5	22	1	0.0454545
12	56300023	-	CS	TRUE	176	174	0.988636	22	1	0.0454545
6	31547723	+	NFKBIL1	FALSE	81	62	0.765432	22	1	0.0454545
1	111755922	+	DDX20	FALSE	498	482	0.967871	22	1	0.0454545
3	25428690	+	RARB	FALSE	213	179	0.840376	22	1	0.0454545
5	169583746	+	SPDL1	FALSE	289	279	0.965398	22	1	0.0454545
8	144358581	+	SLC52A2	TRUE	494	476	0.963563	44	2	0.0454545
1	32651230	+	RBBP4	FALSE	204	175	0.857843	22	1	0.0454545
20	46689443	-	TP53RK	FALSE	321	311	0.968847	22	1	0.0454545
1	193122059	+	CDC73	FALSE	118	98	0.830508	44	2	0.0454545
12	50764088	+	ATF1	FALSE	332	305	0.918675	44	2	0.0454545
5	163460651	+	HMMR	FALSE	81	60	0.740741	22	1	0.0454545
2	206159696	+	EEF1B2	FALSE	57	53	0.929825	22	1	0.0454545
21	34526952	-	RCAN1	FALSE	36	29	0.805556	22	1	0.0454545
10	119651414	+	BAG3	FALSE	183	151	0.825137	22	1	0.0454545
3	14651797	+	CCDC174	FALSE	115	94	0.817391	22	1	0.0454545
1	61082574	+	NFIA	FALSE	54	48	0.888889	22	1	0.0454545
19	39435967	-	RPS16	FALSE	91	78	0.857143	22	1	0.0454545
1	115841126	-	NHLH2	TRUE	122	112	0.918033	22	1	0.0454545
6	34237126	+	HMGA1	FALSE	185	178	0.962162	22	1	0.0454545
8	144792101	-	RPL8	FALSE	39	0	0	44	2	0.0454545
15	78873016	+	MORF4L1	FALSE	354	179	0.50565	22	1	0.0454545
16	14632941	+	BFAR	FALSE	105	96	0.914286	44	2	0.0454545
X	106612065	+	RADX	FALSE	871	806	0.925373	22	1	0.0454545
1	55215364	-	USP24	TRUE	223	206	0.923767	22	1	0.0454545
1	156591805	+	NAXE	FALSE	143	136	0.951049	22	1	0.0454545
6	33418203	-	CUTA	FALSE	72	72	1	22	1	0.0454545
3	133805849	+	SRPRB	FALSE	40	27	0.675	22	1	0.0454545
2	119366763	-	C2orf76	TRUE	120	107	0.891667	22	1	0.0454545
14	23034807	-	PSMB5	FALSE	119	108	0.907563	22	1	0.0454545
8	42541711	-	SLC20A2	TRUE	329	314	0.954407	22	1	0.0454545
3	9750287	+	OGG1	FALSE	117	106	0.905983	22	1	0.0454545
1	156601427	-	GPATCH4	FALSE	82	76	0.926829	22	1	0.0454545
8	116755855	-	EIF3H	FALSE	131	124	0.946565	22	1	0.0454545
3	111978989	+	ABHD10	FALSE	165	154	0.933333	22	1	0.0454545
1	70221637	+	SRSF11	FALSE	146	138	0.945205	22	1	0.0454545
10	102432576	-	CUEDC2	FALSE	822	802	0.975669	22	1	0.0454545
19	36140973	+	CAPNS1	FALSE	260	255	0.980769	22	1	0.0454545
6	130018585	+	L3MBTL3	FALSE	120	80	0.666667	22	1	0.0454545
9	136483038	-	SEC16A	FALSE	72	63	0.875	22	1	0.0454545
19	45039050	+	CLASRP	TRUE	189	175	0.925926	22	1	0.0454545
6	35468385	+	RPL10A	FALSE	274	266	0.970803	44	2	0.0454545
5	149345475	+	GRPEL2	FALSE	89	83	0.932584	22	1	0.0454545
1	19485539	-	CAPZB	TRUE	1125	1091	0.969778	44	2	0.0454545
5	32444704	-	ZFR	FALSE	270	204	0.755556	22	1	0.0454545
17	74203668	+	RPL38	FALSE	446	412	0.923767	66	3	0.0454545
1	17439683	-	RCC2	FALSE	39	36	0.923077	22	1	0.0454545
19	9324179	+	ZNF559	TRUE	546	506	0.92674	155	7	0.0451613
10	12069009	+	DHTKD1	FALSE	1135	1096	0.965639	133	6	0.0451128
1	37690544	-	AIRIM	FALSE	269	249	0.925651	89	4	0.0449438
7	44123527	-	POLD2	FALSE	277	252	0.909747	89	4	0.0449438
8	96233192	-	UQCRB	FALSE	61	1	0.0163934	67	3	0.0447761
19	48872392	+	PPP1R15A	FALSE	245	226	0.922449	67	3	0.0447761
1	156194117	+	SLC25A44	FALSE	639	605	0.946792	67	3	0.0447761
14	21269407	-	HNRNPC	FALSE	561	67	0.11943	134	6	0.0447761
18	49487228	-	C18orf32	FALSE	254	248	0.976378	67	3	0.0447761
11	31509782	+	ELP4	FALSE	369	320	0.867209	67	3	0.0447761
8	27772627	-	CCDC25	TRUE	526	499	0.948669	67	3	0.0447761
X	107628511	+	PRPS1	FALSE	21607	19254	0.887707	1706	75	0.0444664
10	15860520	-	MINDY3	FALSE	533	510	0.956848	45	2	0.0444444
21	46286280	-	MCM3AP	FALSE	131	125	0.954198	45	2	0.0444444
15	75455811	-	SIN3A	FALSE	108	102	0.944444	45	2	0.0444444
10	126905434	+	DOCK1	FALSE	591	565	0.956007	45	2	0.0444444
21	42879543	-	WDR4	FALSE	99	91	0.919192	45	2	0.0444444
3	51500010	-	DCAF1	FALSE	277	252	0.909747	45	2	0.0444444
13	39038398	+	NHLRC3	FALSE	684	620	0.906433	45	2	0.0444444
13	102799141	+	BIVM	FALSE	131	117	0.89313	45	2	0.0444444
22	45671876	+	ATXN10	FALSE	323	308	0.95356	45	2	0.0444444
X	103376363	+	BEX3	FALSE	158	149	0.943038	45	2	0.0444444
7	149873976	+	ATP6V0E2	TRUE	536	511	0.953358	45	2	0.0444444
16	28553941	+	SGF29	FALSE	270	256	0.948148	45	2	0.0444444
11	66843448	+	RCE1	FALSE	188	175	0.930851	45	2	0.0444444
9	128689250	+	SET	FALSE	574	490	0.853659	45	2	0.0444444
22	29268323	+	EWSR1	FALSE	867	568	0.655133	45	2	0.0444444
11	31811118	-	PAX6	TRUE	365	335	0.917808	113	5	0.0442478
19	16542435	-	CHERP	FALSE	591	567	0.959391	113	5	0.0442478
21	42879547	-	WDR4	FALSE	620	561	0.904839	68	3	0.0441176
11	125111621	-	TMEM218	TRUE	491	442	0.900204	68	3	0.0441176
X	72277247	-	RPS4X	FALSE	1090	725	0.665138	68	3	0.0441176
X	47190848	+	UBA1	FALSE	262	196	0.748092	68	3	0.0441176
22	41205320	+	L3MBTL2	FALSE	322	282	0.875776	68	3	0.0441176
X	68829021	+	EFNB1	TRUE	458	400	0.873362	68	3	0.0441176
18	56638639	-	TXNL1	FALSE	182	178	0.978022	68	3	0.0441176
1	27234692	+	WDTC1	FALSE	164	148	0.902439	68	3	0.0441176
8	71356587	-	EYA1	FALSE	268	166	0.619403	68	3	0.0441176
9	133418010	-	REXO4	TRUE	358	324	0.905028	91	4	0.043956
3	89107655	+	EPHA3	FALSE	397	348	0.876574	91	4	0.043956
1	109619846	+	AMPD2	TRUE	646	615	0.952012	91	4	0.043956
19	45178218	-	TRAPPC6A	FALSE	1234	1124	0.910859	616	24	0.0439141
12	54188967	-	SMUG1	FALSE	2352	2147	0.91284	205	9	0.0439024
X	119871857	+	NDUFA1	FALSE	20413	20114	0.976956	367	15	0.0438657
2	152717439	-	PRPF40A	TRUE	3295	3107	0.942944	160	7	0.04375
19	54191322	+	TSEN34	FALSE	369	357	0.96748	69	3	0.0434783
18	34493298	+	DTNA	FALSE	295	293	0.99322	23	1	0.0434783
2	33599299	-	FAM98A	TRUE	168	147	0.875	23	1	0.0434783
13	97222320	+	MBNL2	FALSE	103	94	0.912621	23	1	0.0434783
10	124093596	-	CHST15	FALSE	140	127	0.907143	23	1	0.0434783
12	31073837	+	DDX11	FALSE	28	26	0.928571	23	1	0.0434783
10	113854635	+	NHLRC2	FALSE	52	21	0.403846	23	1	0.0434783
2	38377273	-	ATL2	TRUE	535	514	0.960748	23	1	0.0434783
5	132737543	-	KIF3A	FALSE	113	107	0.946903	23	1	0.0434783
20	62122467	+	LSM14B	FALSE	265	259	0.977358	23	1	0.0434783
2	203535267	-	RAPH1	FALSE	165	147	0.890909	46	2	0.0434783
2	169584804	+	PPIG	FALSE	206	169	0.820388	46	2	0.0434783
12	116881448	-	HRK	FALSE	118	113	0.957627	23	1	0.0434783
2	200864688	-	CLK1	FALSE	204	184	0.901961	23	1	0.0434783
17	75042624	-	ATP5PD	FALSE	40	1	0.025	46	2	0.0434783
2	84905683	+	TMSB10	FALSE	205	100	0.487805	23	1	0.0434783
5	83077338	-	TMEM167A	FALSE	94	91	0.968085	23	1	0.0434783
14	49852773	-	NEMF	FALSE	443	427	0.963883	23	1	0.0434783
12	71839769	+	TBC1D15	FALSE	480	452	0.941667	23	1	0.0434783
7	27140227	-	HOXA3	FALSE	72	69	0.958333	46	2	0.0434783
17	47971078	+	CDK5RAP3	TRUE	240	228	0.95	46	2	0.0434783
6	5003651	-	RPP40	FALSE	115	110	0.956522	23	1	0.0434783
19	2236308	-	PLEKHJ1	FALSE	598	591	0.988294	46	2	0.0434783
17	44345265	+	GRN	TRUE	127	126	0.992126	23	1	0.0434783
12	123633810	+	GTF2H3	FALSE	81	73	0.901235	23	1	0.0434783
2	208254242	-	IDH1	FALSE	97	94	0.969072	23	1	0.0434783
22	27919194	-	PITPNB	FALSE	30	17	0.566667	23	1	0.0434783
4	158671911	-	C4orf46	FALSE	87	80	0.91954	23	1	0.0434783
7	134316966	-	SLC35B4	FALSE	892	814	0.912556	46	2	0.0434783
11	85628607	+	TMEM126B	FALSE	106	59	0.556604	23	1	0.0434783
1	76867480	+	ST6GALNAC5	TRUE	318	289	0.908805	23	1	0.0434783
1	213015791	-	ANGEL2	FALSE	292	267	0.914384	46	2	0.0434783
4	163166845	-	NAF1	FALSE	41	23	0.560976	23	1	0.0434783
7	141014653	-	MRPS33	FALSE	255	226	0.886275	23	1	0.0434783
1	201946510	-	LMOD1	FALSE	399	357	0.894737	23	1	0.0434783
19	38930960	+	MRPS12	FALSE	825	778	0.94303	92	4	0.0434783
14	49620597	-	RPL36AL	FALSE	495	447	0.90303	69	3	0.0434783
1	100894684	-	EXTL2	FALSE	130	123	0.946154	23	1	0.0434783
19	1605442	-	UQCR11	FALSE	1594	1526	0.95734	23	1	0.0434783
8	58553250	+	SDCBP	FALSE	499	460	0.921844	46	2	0.0434783
17	7561929	+	SENP3	FALSE	313	300	0.958466	23	1	0.0434783
12	4649124	+	NDUFA9	FALSE	214	97	0.453271	46	2	0.0434783
18	63422405	-	VPS4B	FALSE	162	134	0.82716	23	1	0.0434783
19	38899980	+	NFKBIB	TRUE	98	82	0.836735	23	1	0.0434783
X	46447299	+	KRBOX4	FALSE	132	110	0.833333	23	1	0.0434783
22	29767007	-	ZMAT5	TRUE	503	478	0.950298	23	1	0.0434783
3	196287687	-	PCYT1A	FALSE	284	265	0.933099	23	1	0.0434783
17	67717964	+	NOL11	FALSE	48	14	0.291667	23	1	0.0434783
12	56688265	-	PTGES3	FALSE	104	92	0.884615	23	1	0.0434783
4	185425904	-	UFSP2	FALSE	398	380	0.954774	23	1	0.0434783
5	97183288	-	RIOK2	FALSE	294	287	0.97619	23	1	0.0434783
19	38930943	+	MRPS12	FALSE	1319	1090	0.826384	115	5	0.0434783
13	44989536	+	GPALPP1	FALSE	1373	1329	0.967953	46	2	0.0434783
1	232950604	+	NTPCR	FALSE	452	432	0.955752	23	1	0.0434783
3	184135363	+	EIF2B5	TRUE	380	359	0.944737	23	1	0.0434783
17	35587336	+	AP2B1	FALSE	625	613	0.9808	23	1	0.0434783
3	147409366	+	ZIC1	FALSE	126	112	0.888889	23	1	0.0434783
14	73950280	+	COQ6	FALSE	221	214	0.968326	23	1	0.0434783
16	18790380	-	RPS15A	FALSE	219	205	0.936073	23	1	0.0434783
12	57488091	+	MARS1	TRUE	473	432	0.913319	161	7	0.0434783
6	31730256	-	DDAH2	FALSE	418	409	0.978469	23	1	0.0434783
7	32490365	-	LSM5	FALSE	114	87	0.763158	23	1	0.0434783
3	49689560	+	RNF123	FALSE	113	102	0.902655	23	1	0.0434783
4	99564005	-	TRMT10A	FALSE	441	394	0.893424	23	1	0.0434783
3	49029402	-	IMPDH2	FALSE	175	159	0.908571	23	1	0.0434783
3	108222368	-	IFT57	FALSE	168	153	0.910714	46	2	0.0434783
3	107522951	+	BBX	FALSE	162	149	0.919753	23	1	0.0434783
1	54053225	-	TMEM59	FALSE	548	544	0.992701	23	1	0.0434783
8	80485594	+	ZBTB10	FALSE	104	85	0.817308	23	1	0.0434783
20	32743444	-	COMMD7	FALSE	132	113	0.856061	23	1	0.0434783
3	79019459	-	ROBO1	TRUE	555	506	0.911712	23	1	0.0434783
15	76311388	-	ETFA	FALSE	163	138	0.846626	46	2	0.0434783
16	66961261	+	CES3	FALSE	141	137	0.971631	23	1	0.0434783
X	72573103	-	HDAC8	FALSE	90	75	0.833333	23	1	0.0434783
19	29606294	+	POP4	TRUE	1962	1908	0.972477	46	2	0.0434783
2	73780108	-	DUSP11	FALSE	255	236	0.92549	23	1	0.0434783
7	96709879	-	SEM1	FALSE	36	29	0.805556	23	1	0.0434783
9	85741924	-	AGTPBP1	FALSE	100	93	0.93	23	1	0.0434783
1	32222241	-	TMEM234	FALSE	60	52	0.866667	23	1	0.0434783
X	103376374	+	BEX3	FALSE	48	42	0.875	23	1	0.0434783
7	101217588	-	PLOD3	FALSE	275	269	0.978182	46	2	0.0434783
15	64381412	-	ENSG00000259316	FALSE	57	36	0.631579	23	1	0.0434783
19	37594742	-	ZNF571	FALSE	95	82	0.863158	23	1	0.0434783
5	113513712	+	YTHDC2	FALSE	144	138	0.958333	23	1	0.0434783
12	6568260	-	NOP2	FALSE	181	164	0.906077	23	1	0.0434783
6	10723180	+	TMEM14C	FALSE	333	318	0.954955	23	1	0.0434783
1	145996605	-	TXNIP	FALSE	122	112	0.918033	23	1	0.0434783
17	1400181	-	YWHAE	TRUE	1023	820	0.801564	69	3	0.0434783
X	119852969	-	UPF3B	FALSE	239	231	0.966527	23	1	0.0434783
12	11649688	+	ETV6	FALSE	227	203	0.894273	23	1	0.0434783
8	6406638	+	MCPH1	FALSE	112	54	0.482143	23	1	0.0434783
10	117005160	-	SHTN1	FALSE	38	38	1	23	1	0.0434783
3	129183854	-	CNBP	FALSE	195	169	0.866667	23	1	0.0434783
3	129183870	-	CNBP	FALSE	104	67	0.644231	23	1	0.0434783
20	31514434	+	HM13	FALSE	111	107	0.963964	23	1	0.0434783
7	149028660	-	PDIA4	FALSE	544	538	0.988971	23	1	0.0434783
6	127266883	+	RNF146	TRUE	1242	894	0.719807	46	2	0.0434783
X	16870274	-	RBBP7	FALSE	1269	1087	0.85658	23	1	0.0434783
1	91022232	-	ZNF644	FALSE	364	331	0.909341	46	2	0.0434783
16	14975067	+	PDXDC1	FALSE	291	279	0.958763	46	2	0.0434783
20	13638928	-	TASP1	FALSE	353	340	0.963173	23	1	0.0434783
15	75455789	-	SIN3A	FALSE	38	34	0.894737	23	1	0.0434783
11	62761524	+	POLR2G	FALSE	144	131	0.909722	23	1	0.0434783
3	50350881	+	CYB561D2	FALSE	360	345	0.958333	23	1	0.0434783
11	20387747	+	PRMT3	TRUE	187	168	0.898396	46	2	0.0434783
X	103255099	-	TCEAL8	FALSE	53	0	0	23	1	0.0434783
2	63589146	+	MDH1	FALSE	52	43	0.826923	23	1	0.0434783
15	68277843	+	FEM1B	FALSE	152	139	0.914474	23	1	0.0434783
11	63974651	+	COX8A	FALSE	591	570	0.964467	46	2	0.0434783
1	109213896	+	SARS1	FALSE	201	179	0.890547	23	1	0.0434783
6	36594427	+	SRSF3	FALSE	24	2	0.0833333	23	1	0.0434783
X	123961784	+	STAG2	FALSE	345	334	0.968116	23	1	0.0434783
17	63741776	-	STRADA	FALSE	441	421	0.954649	46	2	0.0434783
9	137200741	-	TPRN	TRUE	138	134	0.971014	23	1	0.0434783
2	74442350	-	RTKN	FALSE	71	64	0.901408	23	1	0.0434783
11	1763915	-	CTSD	FALSE	174	171	0.982759	23	1	0.0434783
11	407117	-	SIGIRR	FALSE	113	107	0.946903	23	1	0.0434783
X	47218312	+	CDK16	FALSE	469	403	0.859275	23	1	0.0434783
6	37499924	-	CCDC167	FALSE	459	435	0.947712	23	1	0.0434783
1	154220968	+	UBAP2L	FALSE	58	23	0.396552	23	1	0.0434783
3	15427532	-	METTL6	TRUE	233	223	0.957082	23	1	0.0434783
4	39366333	-	RFC1	FALSE	138	71	0.514493	23	1	0.0434783
7	26200772	-	HNRNPA2B1	FALSE	461	389	0.843818	23	1	0.0434783
1	228406804	-	TRIM11	FALSE	71	68	0.957746	23	1	0.0434783
3	122416045	-	WDR5B	FALSE	177	164	0.926554	23	1	0.0434783
1	243256070	+	SDCCAG8	FALSE	417	401	0.961631	23	1	0.0434783
14	23095543	+	C14orf119	FALSE	82	44	0.536585	23	1	0.0434783
15	65792065	-	DENND4A	FALSE	39	32	0.820513	23	1	0.0434783
3	142889204	-	PCOLCE2	FALSE	630	599	0.950794	23	1	0.0434783
15	22786802	+	NIPA1	FALSE	103	94	0.912621	46	2	0.0434783
7	47979615	-	HUS1	TRUE	116	107	0.922414	23	1	0.0434783
9	98056667	+	NANS	FALSE	106	104	0.981132	23	1	0.0434783
X	101408190	+	HNRNPH2	FALSE	334	307	0.919162	23	1	0.0434783
9	95317702	-	FANCC	TRUE	292	277	0.94863	23	1	0.0434783
12	49189066	-	TUBA1A	TRUE	478	451	0.943515	23	1	0.0434783
12	43758773	-	PUS7L	TRUE	646	582	0.900929	69	3	0.0434783
2	32628039	+	TTC27	FALSE	92	89	0.967391	23	1	0.0434783
17	48892823	+	ATP5MC1	FALSE	938	870	0.927505	23	1	0.0434783
7	99504650	+	ZKSCAN5	FALSE	153	137	0.895425	23	1	0.0434783
14	67619894	+	ARG2	FALSE	216	202	0.935185	23	1	0.0434783
3	150603183	-	SERP1	FALSE	244	227	0.930328	23	1	0.0434783
10	113854325	-	DCLRE1A	FALSE	81	70	0.864198	23	1	0.0434783
X	123733030	-	THOC2	FALSE	290	174	0.6	23	1	0.0434783
19	35629087	+	RBM42	FALSE	392	367	0.936224	23	1	0.0434783
12	31073844	+	DDX11	FALSE	74	69	0.932432	46	2	0.0434783
5	10353892	+	MARCHF6	FALSE	3194	3019	0.94521	116	5	0.0431034
1	155173302	-	KRTCAP2	FALSE	2827	2744	0.957225	530	28	0.0430869
3	52706129	+	SPCS1	FALSE	1438	1386	0.963839	163	7	0.0429448
X	103686652	-	MORF4L2	FALSE	102	7	0.0686275	70	3	0.0428571
1	1399311	-	CCNL2	TRUE	576	546	0.947917	70	3	0.0428571
21	42879524	-	WDR4	FALSE	204	181	0.887255	70	3	0.0428571
2	71068310	+	NAGK	FALSE	194	189	0.974227	70	3	0.0428571
1	147670474	-	ACP6	FALSE	2769	2530	0.913687	258	11	0.0426357
7	135557891	+	NUP205	FALSE	252	222	0.880952	47	2	0.0425532
1	54887195	-	DHCR24	TRUE	1811	1759	0.978196	94	4	0.0425532
7	129611783	+	NRF1	FALSE	173	162	0.936416	47	2	0.0425532
11	6683300	-	MRPL17	FALSE	149	39	0.261745	47	2	0.0425532
2	130342135	-	CCDC115	TRUE	1065	994	0.933333	94	4	0.0425532
5	177303657	-	RAB24	FALSE	308	285	0.925325	47	2	0.0425532
11	62761601	+	POLR2G	FALSE	187	175	0.935829	47	2	0.0425532
1	93180429	-	TMED5	FALSE	395	378	0.956962	47	2	0.0425532
12	49752498	+	TMBIM6	FALSE	24	1	0.0416667	47	2	0.0425532
1	169368004	+	BLZF1	FALSE	119	105	0.882353	47	2	0.0425532
2	85354769	+	ELMOD3	TRUE	1744	1624	0.931193	47	2	0.0425532
16	57447369	-	CIAPIN1	FALSE	366	335	0.915301	47	2	0.0425532
3	14178619	-	XPC	FALSE	432	423	0.979167	47	2	0.0425532
11	64318216	+	PRDX5	FALSE	396	372	0.939394	47	2	0.0425532
12	6493379	+	NCAPD2	FALSE	324	292	0.901235	47	2	0.0425532
1	36464360	-	MRPS15	FALSE	699	672	0.961373	47	2	0.0425532
17	7252310	+	ELP5	FALSE	816	745	0.91299	47	2	0.0425532
15	43330674	+	ADAL	TRUE	181	170	0.939227	47	2	0.0425532
11	67401825	-	PPP1CA	FALSE	729	720	0.987654	47	2	0.0425532
17	4796174	+	PSMB6	FALSE	782	607	0.776215	47	2	0.0425532
7	1160159	-	ZFAND2A	FALSE	100	95	0.95	47	2	0.0425532
19	5720143	-	LONP1	TRUE	1131	993	0.877984	479	25	0.0422708
12	54280154	-	CBX5	FALSE	244	227	0.930328	71	3	0.0422535
15	50355191	-	GABPB1	TRUE	271	247	0.911439	71	3	0.0422535
14	92121986	+	CPSF2	FALSE	164	94	0.573171	71	3	0.0422535
1	203795623	+	ZC3H11A	TRUE	235	223	0.948936	71	3	0.0422535
20	58981283	+	NELFCD	FALSE	550	451	0.82	95	4	0.0421053
1	111140058	-	DRAM2	FALSE	504	469	0.930556	119	5	0.0420168
12	6494128	+	NCAPD2	FALSE	286	274	0.958042	24	1	0.0416667
7	128739389	+	CALU	FALSE	72	61	0.847222	24	1	0.0416667
6	43229474	-	DNPH1	FALSE	306	287	0.937908	24	1	0.0416667
11	61362387	+	TMEM138	FALSE	231	201	0.87013	24	1	0.0416667
7	40134591	-	MPLKIP	FALSE	105	65	0.619048	24	1	0.0416667
4	87422643	+	NUDT9	FALSE	95	87	0.915789	24	1	0.0416667
16	22297437	+	POLR3E	FALSE	79	76	0.962025	24	1	0.0416667
4	173168834	+	GALNT7	FALSE	66	48	0.727273	24	1	0.0416667
4	56977585	-	NOA1	FALSE	33	26	0.787879	24	1	0.0416667
1	117060347	+	TTF2	FALSE	209	173	0.827751	24	1	0.0416667
8	144522546	+	LRRC14	FALSE	216	204	0.944444	24	1	0.0416667
X	155264477	-	RAB39B	FALSE	59	55	0.932203	48	2	0.0416667
21	37073045	-	PIGP	FALSE	450	434	0.964444	24	1	0.0416667
11	65961719	+	SART1	FALSE	43	42	0.976744	24	1	0.0416667
16	53830	+	SNRNP25	FALSE	1086	1063	0.978821	48	2	0.0416667
1	52927332	+	SCP2	FALSE	144	140	0.972222	24	1	0.0416667
16	28553935	+	SGF29	FALSE	197	194	0.984772	24	1	0.0416667
1	75724733	+	ACADM	FALSE	385	351	0.911688	48	2	0.0416667
10	103396442	-	ATP5MK	FALSE	310	96	0.309677	72	3	0.0416667
1	74733208	+	TYW3	FALSE	470	441	0.938298	24	1	0.0416667
10	75401818	-	ZNF503	FALSE	60	52	0.866667	24	1	0.0416667
8	143990085	+	GRINA	FALSE	134	132	0.985075	24	1	0.0416667
10	119892521	-	MCMBP	FALSE	148	133	0.898649	24	1	0.0416667
15	90388251	+	IQGAP1	FALSE	104	99	0.951923	24	1	0.0416667
1	156291516	-	GLMP	FALSE	336	320	0.952381	48	2	0.0416667
1	52927355	+	SCP2	FALSE	73	67	0.917808	24	1	0.0416667
1	93180411	-	TMED5	FALSE	258	250	0.968992	24	1	0.0416667
19	52897615	-	ZNF320	FALSE	67	59	0.880597	24	1	0.0416667
6	107459553	-	PDSS2	FALSE	82	72	0.878049	24	1	0.0416667
16	24539568	+	RBBP6	FALSE	383	371	0.968668	24	1	0.0416667
15	34101856	-	EMC7	FALSE	93	70	0.752688	24	1	0.0416667
19	57814910	-	ZNF552	FALSE	39	36	0.923077	24	1	0.0416667
1	169427462	-	CCDC181	TRUE	2001	1755	0.877061	48	2	0.0416667
3	120596372	+	NDUFB4	FALSE	110	3	0.0272727	24	1	0.0416667
7	100088988	+	COPS6	FALSE	202	177	0.876238	24	1	0.0416667
12	4604854	+	DYRK4	FALSE	225	214	0.951111	24	1	0.0416667
15	75903857	+	FBXO22	FALSE	239	218	0.912134	24	1	0.0416667
17	75042623	-	ATP5PD	FALSE	25	1	0.04	24	1	0.0416667
20	45406139	+	DBNDD2	FALSE	40	39	0.975	24	1	0.0416667
10	68721249	+	CCAR1	FALSE	110	93	0.845455	24	1	0.0416667
16	2251614	-	ECI1	FALSE	174	167	0.95977	24	1	0.0416667
17	3723901	+	HASPIN	FALSE	152	118	0.776316	24	1	0.0416667
22	29766961	-	ZMAT5	FALSE	212	196	0.924528	24	1	0.0416667
6	53065445	+	FBXO9	FALSE	194	186	0.958763	24	1	0.0416667
19	15125692	-	ILVBL	FALSE	464	447	0.963362	24	1	0.0416667
3	64023455	-	PSMD6	FALSE	202	186	0.920792	24	1	0.0416667
1	154936725	-	PMVK	FALSE	284	279	0.982394	24	1	0.0416667
11	5685104	-	TRIM5	FALSE	203	201	0.990148	24	1	0.0416667
X	103585531	+	TCEAL4	FALSE	72	23	0.319444	24	1	0.0416667
5	139439477	-	DNAJC18	FALSE	61	58	0.95082	24	1	0.0416667
7	98878478	+	TRRAP	FALSE	104	100	0.961538	24	1	0.0416667
17	17237191	-	FLCN	FALSE	147	141	0.959184	24	1	0.0416667
15	41660464	+	MGA	FALSE	195	193	0.989744	24	1	0.0416667
2	151409902	+	RIF1	TRUE	256	253	0.988281	24	1	0.0416667
20	45363149	+	SYS1	FALSE	30	27	0.9	24	1	0.0416667
7	134646828	+	BPGM	FALSE	631	578	0.916006	24	1	0.0416667
12	118016706	+	RFC5	FALSE	323	295	0.913313	48	2	0.0416667
16	69424677	+	CYB5B	FALSE	177	143	0.80791	24	1	0.0416667
14	73851852	+	PTGR2	FALSE	254	241	0.948819	24	1	0.0416667
17	7857997	+	CYB5D1	FALSE	99	83	0.838384	24	1	0.0416667
6	26285564	-	H4C8	FALSE	32	28	0.875	24	1	0.0416667
3	142888989	-	PCOLCE2	FALSE	168	156	0.928571	24	1	0.0416667
5	100535352	+	FAM174A	FALSE	522	498	0.954023	24	1	0.0416667
14	24232347	-	NEDD8-MDP1	FALSE	375	348	0.928	24	1	0.0416667
14	35122580	+	PRORP	FALSE	43	34	0.790698	24	1	0.0416667
3	128879658	+	ACAD9	FALSE	198	170	0.858586	48	2	0.0416667
16	74666892	-	RFWD3	FALSE	134	125	0.932836	24	1	0.0416667
11	63681477	+	RTN3	FALSE	127	117	0.92126	24	1	0.0416667
6	125781105	+	NCOA7	FALSE	167	147	0.88024	24	1	0.0416667
19	12806609	+	RNASEH2A	FALSE	81	44	0.54321	24	1	0.0416667
16	75623297	-	ADAT1	FALSE	102	97	0.95098	24	1	0.0416667
12	28190438	+	CCDC91	FALSE	306	295	0.964052	24	1	0.0416667
11	61392646	+	TMEM216	FALSE	237	191	0.805907	24	1	0.0416667
7	128343899	-	RBM28	FALSE	142	138	0.971831	24	1	0.0416667
17	41688916	+	EIF1	FALSE	49	20	0.408163	24	1	0.0416667
22	38057435	+	PICK1	FALSE	182	180	0.989011	24	1	0.0416667
3	193593226	+	OPA1	FALSE	299	291	0.973244	24	1	0.0416667
14	24213075	-	CHMP4A	FALSE	95	84	0.884211	72	3	0.0416667
15	91022596	-	VPS33B	TRUE	217	206	0.949309	72	3	0.0416667
3	100709361	+	TFG	FALSE	196	181	0.923469	48	2	0.0416667
4	186726670	-	FAT1	FALSE	105	98	0.933333	24	1	0.0416667
5	40834603	-	RPL37	FALSE	50	1	0.02	24	1	0.0416667
1	151165872	-	LYSMD1	FALSE	157	151	0.961783	48	2	0.0416667
15	44537181	+	EIF3J	FALSE	181	165	0.911602	24	1	0.0416667
14	22929363	-	PRMT5	FALSE	58	28	0.482759	24	1	0.0416667
19	48836511	-	HSD17B14	FALSE	96	94	0.979167	24	1	0.0416667
1	150235976	-	ANP32E	FALSE	53	40	0.754717	24	1	0.0416667
5	127517617	+	PRRC1	FALSE	115	110	0.956522	24	1	0.0416667
15	40807464	-	DNAJC17	FALSE	174	158	0.908046	24	1	0.0416667
14	58427526	-	TIMM9	FALSE	129	121	0.937984	24	1	0.0416667
1	226309883	-	LIN9	FALSE	146	124	0.849315	24	1	0.0416667
1	33349908	-	PHC2	FALSE	127	125	0.984252	24	1	0.0416667
12	52905054	-	KRT8	FALSE	74	56	0.756757	24	1	0.0416667
8	38030569	+	EIF4EBP1	FALSE	167	151	0.904192	24	1	0.0416667
19	4400566	-	SH3GL1	FALSE	94	82	0.87234	24	1	0.0416667
7	100889718	-	UFSP1	FALSE	77	74	0.961039	24	1	0.0416667
4	53377668	+	FIP1L1	FALSE	196	177	0.903061	48	2	0.0416667
5	126777145	+	LMNB1	FALSE	854	812	0.95082	24	1	0.0416667
5	36152118	+	SKP2	FALSE	667	617	0.925037	48	2	0.0416667
1	32179753	+	TXLNA	FALSE	110	87	0.790909	24	1	0.0416667
13	72727634	-	MZT1	FALSE	335	318	0.949254	24	1	0.0416667
2	161308406	+	PSMD14	FALSE	407	397	0.97543	24	1	0.0416667
X	53225449	-	KDM5C	FALSE	58	55	0.948276	24	1	0.0416667
7	65373827	+	ZNF92	FALSE	60	56	0.933333	24	1	0.0416667
1	155262275	-	SCAMP3	FALSE	349	319	0.91404	24	1	0.0416667
7	151227176	-	ABCF2-H2BK1	FALSE	222	210	0.945946	24	1	0.0416667
1	214603214	+	CENPF	FALSE	1040	986	0.948077	24	1	0.0416667
1	23868290	-	FUCA1	TRUE	310	302	0.974194	24	1	0.0416667
17	19362716	-	B9D1	FALSE	776	640	0.824742	48	2	0.0416667
6	159762085	+	ACAT2	FALSE	197	122	0.619289	24	1	0.0416667
3	97764775	+	ARL6	FALSE	723	663	0.917012	24	1	0.0416667
2	180007112	-	CWC22	FALSE	174	146	0.83908	24	1	0.0416667
19	55600021	+	ZNF524	FALSE	99	97	0.979798	24	1	0.0416667
X	16870386	-	RBBP7	FALSE	80	74	0.925	24	1	0.0416667
18	21600651	-	ESCO1	FALSE	274	253	0.923358	48	2	0.0416667
2	27663666	-	SUPT7L	FALSE	49	40	0.816327	24	1	0.0416667
19	49677278	+	PRMT1	FALSE	73	39	0.534247	24	1	0.0416667
1	117929621	-	GDAP2	TRUE	240	238	0.991667	24	1	0.0416667
19	49487555	+	RPL13A	FALSE	333	313	0.93994	24	1	0.0416667
18	46098274	-	ATP5F1A	FALSE	310	263	0.848387	24	1	0.0416667
1	156054782	+	LAMTOR2	TRUE	680	660	0.970588	24	1	0.0416667
19	7629702	+	PET100	FALSE	375	367	0.978667	24	1	0.0416667
22	24555182	-	GUCD1	TRUE	342	328	0.959064	24	1	0.0416667
8	123396431	-	ATAD2	FALSE	421	366	0.869359	24	1	0.0416667
1	150293843	+	MRPS21	FALSE	277	263	0.949458	24	1	0.0416667
19	40613402	+	LTBP4	FALSE	141	135	0.957447	24	1	0.0416667
19	48445995	+	GRWD1	FALSE	132	103	0.780303	24	1	0.0416667
17	50397548	-	LRRC59	FALSE	527	494	0.937381	24	1	0.0416667
18	46104381	+	HAUS1	FALSE	691	661	0.956585	24	1	0.0416667
22	40856631	-	ST13	FALSE	196	187	0.954082	24	1	0.0416667
19	10194661	-	DNMT1	FALSE	68	67	0.985294	24	1	0.0416667
19	35510456	-	DMKN	FALSE	121	62	0.512397	24	1	0.0416667
19	2328459	-	LSM7	FALSE	100	5	0.05	24	1	0.0416667
X	86047534	-	CHM	FALSE	38	31	0.815789	24	1	0.0416667
1	23344300	-	HNRNPR	FALSE	474	447	0.943038	24	1	0.0416667
1	151165957	-	LYSMD1	FALSE	87	78	0.896552	24	1	0.0416667
9	137205664	-	TMEM203	FALSE	992	954	0.961694	72	3	0.0416667
9	128098514	+	SLC25A25	FALSE	29	20	0.689655	24	1	0.0416667
8	125091755	-	WASHC5	FALSE	421	395	0.938242	24	1	0.0416667
4	153204414	+	ENSG00000288637	FALSE	220	202	0.918182	24	1	0.0416667
1	154974666	+	CKS1B	FALSE	79	75	0.949367	24	1	0.0416667
1	91022025	-	ZNF644	FALSE	681	647	0.950073	96	4	0.0416667
1	1232279	+	B3GALT6	FALSE	197	181	0.918782	48	2	0.0416667
17	59707689	+	VMP1	FALSE	1533	1490	0.97195	48	2	0.0416667
19	913219	-	R3HDM4	TRUE	472	460	0.974576	24	1	0.0416667
15	43800599	+	HYPK	TRUE	2629	2553	0.963839	265	8	0.0416279
15	65611131	-	INTS14	TRUE	3192	3070	0.961779	534	22	0.0413462
12	118016744	+	RFC5	FALSE	944	863	0.914195	194	8	0.0412371
8	73976188	+	TMEM70	FALSE	976	914	0.936475	170	7	0.0411765
2	32063968	+	SPAST	TRUE	415	404	0.973494	73	3	0.0410959
2	108377970	+	SULT1C4	FALSE	721	682	0.945908	73	3	0.0410959
11	60842058	+	CCDC86	FALSE	982	947	0.964358	146	6	0.0410959
2	9423176	-	ITGB1BP1	TRUE	1379	1355	0.982596	73	3	0.0410959
14	74084972	+	LIN52	FALSE	189	157	0.830688	73	3	0.0410959
12	54000171	+	HOXC9	FALSE	1555	1403	0.902251	202	9	0.0409873
6	107459564	-	PDSS2	TRUE	631	573	0.908082	122	5	0.0409836
3	58433827	-	PDHB	FALSE	14607	14172	0.970654	311	11	0.0409313
12	57455318	+	INHBE	FALSE	53	35	0.660377	2999	107	0.0408516
1	224356925	+	CNIH4	FALSE	62	29	0.467742	49	2	0.0408163
17	47941676	+	PNPO	FALSE	417	393	0.942446	49	2	0.0408163
22	20117557	+	RANBP1	TRUE	2532	2452	0.968404	49	2	0.0408163
11	62665203	-	C11orf98	FALSE	714	682	0.955182	49	2	0.0408163
6	4776377	+	CDYL	FALSE	288	257	0.892361	49	2	0.0408163
4	82374017	-	HNRNPD	FALSE	553	525	0.949367	49	2	0.0408163
2	63841858	+	UGP2	FALSE	185	148	0.8	49	2	0.0408163
8	98045552	-	RPL30	FALSE	192	108	0.5625	49	2	0.0408163
3	51974021	-	ABHD14B	TRUE	541	522	0.96488	49	2	0.0408163
17	7572765	+	EIF4A1	FALSE	322	283	0.878882	49	2	0.0408163
22	39502362	+	MIEF1	FALSE	2383	2189	0.91859	172	7	0.0406977
1	150067322	+	VPS45	FALSE	375	353	0.941333	74	3	0.0405405
8	108248681	-	EIF3E	FALSE	154	25	0.162338	74	3	0.0405405
2	169573812	-	FASTKD1	TRUE	4724	4469	0.94602	296	12	0.0405405
9	111661605	+	GNG10	TRUE	2979	2951	0.990601	74	3	0.0405405
5	64768955	+	CWC27	FALSE	228	198	0.868421	74	3	0.0405405
3	9750285	+	OGG1	FALSE	218	207	0.949541	99	4	0.040404
1	114716735	-	NRAS	FALSE	350	303	0.865714	124	5	0.0403226
16	71895538	+	IST1	FALSE	1328	1207	0.908886	248	10	0.0403226
1	63523225	-	ITGB3BP	TRUE	3298	3105	0.94286	1086	52	0.0403032
12	133080425	+	ZNF140	FALSE	374	363	0.970588	199	8	0.040201
X	103686696	-	MORF4L2	FALSE	15154	11994	0.746702	2996	140	0.040178
8	60517238	+	RAB2A	FALSE	178	176	0.988764	25	1	0.04
19	37371207	+	ZNF527	FALSE	64	62	0.96875	25	1	0.04
11	36594511	+	IFTAP	FALSE	537	440	0.819367	50	2	0.04
13	49444039	-	CAB39L	FALSE	176	161	0.914773	25	1	0.04
11	64246915	-	PPP1R14B	FALSE	283	274	0.968198	25	1	0.04
14	104753202	+	SIVA1	TRUE	591	553	0.935702	50	2	0.04
14	74084453	-	ALDH6A1	TRUE	154	154	1	25	1	0.04
20	41340821	+	LPIN3	TRUE	350	324	0.925714	25	1	0.04
2	27890392	-	RBKS	FALSE	175	168	0.96	25	1	0.04
8	100150679	+	POLR2K	FALSE	79	47	0.594937	25	1	0.04
12	6867504	+	TPI1	FALSE	556	543	0.976619	25	1	0.04
2	231056912	+	PSMD1	FALSE	384	360	0.9375	25	1	0.04
19	17267415	+	ENSG00000269307	FALSE	444	421	0.948198	50	2	0.04
2	61538246	-	XPO1	FALSE	1410	1302	0.923404	50	2	0.04
5	140564825	+	SLC35A4	FALSE	689	665	0.965167	50	2	0.04
6	131628142	-	MED23	FALSE	163	149	0.91411	25	1	0.04
6	8435543	-	SLC35B3	FALSE	411	378	0.919708	25	1	0.04
17	18039168	-	ATPAF2	TRUE	532	500	0.93985	25	1	0.04
2	46915794	-	MCFD2	FALSE	354	339	0.957627	25	1	0.04
1	145918717	-	PEX11B	TRUE	164	118	0.719512	25	1	0.04
1	170074614	-	KIFAP3	FALSE	104	100	0.961538	25	1	0.04
2	171434227	+	DCAF17	FALSE	365	346	0.947945	25	1	0.04
2	207165945	-	KLF7	FALSE	112	95	0.848214	25	1	0.04
1	32179758	+	TXLNA	FALSE	167	158	0.946108	25	1	0.04
17	7234507	-	DVL2	FALSE	194	179	0.92268	25	1	0.04
12	56128262	+	ESYT1	FALSE	222	214	0.963964	25	1	0.04
16	2047823	-	NTHL1	FALSE	876	839	0.957763	25	1	0.04
22	40370641	+	SGSM3	FALSE	227	217	0.955947	25	1	0.04
19	45423544	-	ERCC1	FALSE	172	149	0.866279	25	1	0.04
1	150235930	-	ANP32E	FALSE	82	56	0.682927	25	1	0.04
3	9750286	+	OGG1	FALSE	55	47	0.854545	25	1	0.04
8	116874752	-	RAD21	FALSE	272	218	0.801471	25	1	0.04
20	3786763	-	CENPB	FALSE	154	146	0.948052	25	1	0.04
4	183659297	+	TRAPPC11	FALSE	744	691	0.928763	25	1	0.04
14	26597097	-	NOVA1	FALSE	34	32	0.941176	25	1	0.04
5	32174284	-	GOLPH3	FALSE	157	147	0.936306	25	1	0.04
1	186375235	-	TPR	FALSE	152	131	0.861842	25	1	0.04
9	20622508	-	MLLT3	FALSE	504	465	0.922619	50	2	0.04
20	36236458	+	AAR2	FALSE	290	278	0.958621	50	2	0.04
6	31547637	+	NFKBIL1	FALSE	119	114	0.957983	25	1	0.04
16	30445894	-	SEPHS2	FALSE	201	183	0.910448	25	1	0.04
10	97401335	-	RRP12	FALSE	65	32	0.492308	25	1	0.04
1	27773290	+	STX12	FALSE	274	269	0.981752	25	1	0.04
1	212858275	+	FLVCR1	TRUE	271	260	0.95941	25	1	0.04
14	99481410	+	CCNK	FALSE	557	523	0.938959	75	3	0.04
11	118572426	+	ARCN1	FALSE	92	78	0.847826	25	1	0.04
14	55027236	+	SOCS4	TRUE	352	329	0.934659	25	1	0.04
X	9463315	+	TBL1X	FALSE	274	262	0.956204	50	2	0.04
10	33334571	-	NRP1	FALSE	214	188	0.878505	25	1	0.04
11	28108159	-	KIF18A	FALSE	475	424	0.892632	25	1	0.04
7	30771437	+	MINDY4	FALSE	145	123	0.848276	25	1	0.04
15	65869547	+	RAB11A	FALSE	245	232	0.946939	25	1	0.04
1	228103256	-	C1orf35	FALSE	126	120	0.952381	25	1	0.04
4	70839895	-	GRSF1	FALSE	352	335	0.951705	25	1	0.04
6	109691319	+	FIG4	FALSE	100	92	0.92	25	1	0.04
10	56361263	-	ZWINT	FALSE	468	406	0.867521	25	1	0.04
15	69414373	+	KIF23	FALSE	190	177	0.931579	25	1	0.04
4	56436149	+	PAICS	FALSE	217	209	0.963134	25	1	0.04
19	19516264	+	NDUFA13	FALSE	96	26	0.270833	25	1	0.04
15	64381428	-	ENSG00000259316	FALSE	47	4	0.0851064	25	1	0.04
10	67838035	-	DNAJC12	FALSE	86	70	0.813953	25	1	0.04
17	18183114	+	ALKBH5	FALSE	133	68	0.511278	25	1	0.04
1	45550811	+	AKR1A1	FALSE	182	174	0.956044	25	1	0.04
16	29996231	+	INO80E	FALSE	208	197	0.947115	25	1	0.04
X	107628537	+	PRPS1	FALSE	96	9	0.09375	50	2	0.04
2	218568642	+	CNOT9	FALSE	75	66	0.88	25	1	0.04
15	63157499	-	RPS27L	TRUE	1043	1015	0.973154	25	1	0.04
1	112619879	+	CAPZA1	FALSE	59	2	0.0338983	25	1	0.04
X	153599139	-	CCNQ	TRUE	523	485	0.927342	50	2	0.04
2	120223388	-	TMEM185B	FALSE	142	136	0.957746	25	1	0.04
17	60526204	-	APPBP2	FALSE	127	120	0.944882	25	1	0.04
6	149317552	+	TAB2	FALSE	208	200	0.961538	50	2	0.04
6	87590169	+	ORC3	FALSE	88	56	0.636364	25	1	0.04
10	79445624	-	ZCCHC24	TRUE	119	111	0.932773	25	1	0.04
12	133181481	+	ZNF268	FALSE	63	54	0.857143	25	1	0.04
1	156291498	-	GLMP	FALSE	227	209	0.920705	25	1	0.04
3	64023470	-	PSMD6	FALSE	604	588	0.97351	50	2	0.04
X	15493279	-	PIR	FALSE	329	313	0.951368	25	1	0.04
10	87094885	-	GLUD1	FALSE	359	341	0.949861	25	1	0.04
4	109815569	+	GAR1	FALSE	26	6	0.230769	25	1	0.04
6	26103974	+	H4C3	FALSE	39	1	0.025641	50	2	0.04
2	37231581	-	CEBPZ	FALSE	868	791	0.91129	100	4	0.04
19	15379763	-	AKAP8	FALSE	180	172	0.955556	25	1	0.04
19	11559227	-	ELOF1	FALSE	408	383	0.938725	25	1	0.04
14	21269442	-	HNRNPC	TRUE	1511	1379	0.912641	50	2	0.04
14	39114339	+	GEMIN2	FALSE	117	61	0.521368	25	1	0.04
6	150143044	+	PPP1R14C	TRUE	700	664	0.948571	50	2	0.04
6	149746486	-	NUP43	FALSE	31	1	0.0322581	25	1	0.04
22	43143348	-	MCAT	FALSE	289	266	0.920415	50	2	0.04
3	25790103	+	OXSM	FALSE	525	511	0.973333	50	2	0.04
12	21654653	-	LDHB	FALSE	50	3	0.06	25	1	0.04
1	26921757	+	NUDC	FALSE	1060	1022	0.964151	25	1	0.04
17	16381392	+	UBB	FALSE	1422	1325	0.931786	25	1	0.04
13	99200861	+	UBAC2	FALSE	248	245	0.987903	25	1	0.04
6	30061357	+	POLR1H	FALSE	56	53	0.946429	25	1	0.04
15	74461185	-	UBL7	FALSE	163	157	0.96319	25	1	0.04
11	57530776	-	TIMM10	FALSE	160	153	0.95625	25	1	0.04
13	36346688	-	SPART	FALSE	60	52	0.866667	25	1	0.04
15	82540531	-	RPS17	FALSE	417	371	0.889688	25	1	0.04
6	131628231	-	MED23	FALSE	240	223	0.929167	25	1	0.04
17	44899380	-	EFTUD2	FALSE	170	157	0.923529	50	2	0.04
X	103686725	-	MORF4L2	FALSE	313	308	0.984026	25	1	0.04
16	53503226	-	AKTIP	FALSE	196	189	0.964286	25	1	0.04
2	38876032	+	MORN2	FALSE	879	840	0.955631	75	3	0.04
7	106112315	-	SYPL1	FALSE	99	99	1	25	1	0.04
8	53843240	-	ATP6V1H	FALSE	124	114	0.919355	25	1	0.04
1	151909402	-	THEM4	FALSE	297	276	0.929293	25	1	0.04
8	54135225	+	MRPL15	FALSE	218	169	0.775229	25	1	0.04
17	75012667	+	MRPL58	FALSE	965	955	0.989637	25	1	0.04
14	23035130	-	PSMB5	FALSE	408	393	0.963235	25	1	0.04
1	36464283	-	MRPS15	FALSE	372	352	0.946237	25	1	0.04
X	135973734	-	MMGT1	FALSE	53	41	0.773585	25	1	0.04
7	28686137	+	CREB5	TRUE	86	82	0.953488	50	2	0.04
1	236604523	-	HEATR1	FALSE	142	135	0.950704	25	1	0.04
6	32154373	-	ENSG00000285085	TRUE	102	101	0.990196	25	1	0.04
2	60756323	+	PAPOLG	FALSE	294	262	0.891156	25	1	0.04
2	201116164	+	CFLAR	TRUE	757	683	0.902246	25	1	0.04
15	77420122	-	PEAK1	TRUE	90	76	0.844444	50	2	0.04
10	7787972	-	KIN	FALSE	91	87	0.956044	25	1	0.04
16	71484614	-	ZNF19	TRUE	110	106	0.963636	25	1	0.04
11	94973560	-	CWC15	FALSE	158	120	0.759494	25	1	0.04
2	201118716	+	CFLAR	FALSE	121	118	0.975207	25	1	0.04
17	43170511	+	NBR1	FALSE	312	282	0.903846	25	1	0.04
10	78033842	+	RPS24	FALSE	225	204	0.906667	25	1	0.04
3	105366909	+	ALCAM	TRUE	211	191	0.905213	25	1	0.04
22	23839008	-	DERL3	FALSE	321	303	0.943925	25	1	0.04
5	69369974	-	TAF9	FALSE	191	151	0.790576	25	1	0.04
10	26697669	+	PDSS1	FALSE	301	273	0.906977	25	1	0.04
4	146521936	-	SLC10A7	FALSE	437	411	0.940503	25	1	0.04
9	36572913	+	MELK	FALSE	160	125	0.78125	25	1	0.04
17	63600882	+	TACO1	TRUE	426	419	0.983568	25	1	0.04
12	53727424	-	CALCOCO1	FALSE	101	96	0.950495	25	1	0.04
5	35617872	+	SPEF2	FALSE	194	178	0.917526	25	1	0.04
2	189784316	-	ORMDL1	FALSE	96	93	0.96875	25	1	0.04
15	88621381	+	AEN	TRUE	257	238	0.92607	25	1	0.04
19	37594880	+	ZNF540	FALSE	269	238	0.884758	25	1	0.04
22	39520584	+	ATF4	FALSE	60	22	0.366667	25	1	0.04
1	109042100	-	WDR47	FALSE	296	266	0.898649	25	1	0.04
7	87876285	-	SLC25A40	FALSE	137	127	0.927007	25	1	0.04
21	29019297	-	RWDD2B	FALSE	47	35	0.744681	25	1	0.04
3	97764758	+	ARL6	TRUE	349	321	0.919771	25	1	0.04
19	46413569	-	CCDC8	FALSE	349	319	0.91404	25	1	0.04
3	38496477	+	EXOG	FALSE	190	173	0.910526	25	1	0.04
3	39052045	+	WDR48	FALSE	279	266	0.953405	25	1	0.04
11	78079788	-	NDUFC2-KCTD14	FALSE	141	126	0.893617	25	1	0.04
19	48619156	-	RPL18	FALSE	532	518	0.973684	25	1	0.04
19	17305880	+	MRPL34	FALSE	611	586	0.959083	50	2	0.04
5	64769082	+	CWC27	FALSE	38	34	0.894737	25	1	0.04
12	11171599	-	ENSG00000275778	FALSE	325	300	0.923077	175	7	0.04
19	1479206	-	C19orf25	FALSE	283	274	0.968198	50	2	0.04
4	39638935	-	SMIM14	FALSE	143	137	0.958042	25	1	0.04
7	134986524	+	AGBL3	FALSE	153	134	0.875817	25	1	0.04
5	140303076	-	PFDN1	FALSE	174	62	0.356322	25	1	0.04
X	123733056	-	THOC2	TRUE	2225	2114	0.950112	126	5	0.0396825
1	8878660	-	ENO1	FALSE	1633	1416	0.867116	227	9	0.0396476
1	40097254	-	PPT1	TRUE	13134	12496	0.943458	1145	41	0.0395947
10	90871974	+	RPP30	TRUE	45952	41997	0.907254	10149	449	0.0395248
2	32277913	+	YIPF4	FALSE	1318	1200	0.91047	304	12	0.0394737
19	39435955	-	RPS16	FALSE	596	587	0.984899	76	3	0.0394737
12	57745071	+	TSPAN31	FALSE	1353	1339	0.989653	76	3	0.0394737
19	49676153	+	PRMT1	FALSE	621	591	0.951691	76	3	0.0394737
7	66995523	-	SBDS	FALSE	287	268	0.933798	76	3	0.0394737
16	58734329	-	GOT2	FALSE	1072	1051	0.98041	229	9	0.0393013
4	86934710	-	C4orf36	FALSE	374	339	0.906417	51	2	0.0392157
2	96740042	-	LMAN2L	FALSE	58	47	0.810345	51	2	0.0392157
5	124746620	-	ZNF608	FALSE	145	117	0.806897	51	2	0.0392157
16	68085445	+	NFATC3	FALSE	241	218	0.904564	51	2	0.0392157
14	21269328	-	HNRNPC	FALSE	31	8	0.258065	51	2	0.0392157
1	77979015	-	FUBP1	FALSE	520	474	0.911538	51	2	0.0392157
20	41618428	-	CHD6	FALSE	359	312	0.869081	51	2	0.0392157
5	172983800	+	ATP6V0E1	FALSE	1489	1374	0.922767	51	2	0.0392157
7	56051819	+	CCT6A	FALSE	2116	2081	0.983459	51	2	0.0392157
20	36773761	-	DSN1	FALSE	200	157	0.785	51	2	0.0392157
7	100119651	+	CNPY4	FALSE	153	132	0.862745	51	2	0.0392157
5	95554987	-	SKIC3	FALSE	680	647	0.951471	51	2	0.0392157
22	45163944	+	NUP50	FALSE	71	66	0.929577	51	2	0.0392157
1	109075976	-	TAF13	FALSE	528	492	0.931818	51	2	0.0392157
3	9397615	+	SETD5	TRUE	482	450	0.93361	51	2	0.0392157
1	24413725	-	STPG1	TRUE	374	348	0.930481	102	4	0.0392157
1	154983387	+	FLAD1	FALSE	539	513	0.951763	51	2	0.0392157
4	102869060	+	CISD2	FALSE	2099	1994	0.949976	128	5	0.0390625
1	39955145	+	MFSD2A	TRUE	248	239	0.96371	77	3	0.038961
16	66830935	-	NAE1	FALSE	1674	1575	0.94086	77	3	0.038961
19	46347080	+	PPP5C	FALSE	610	587	0.962295	77	3	0.038961
10	42782776	+	BMS1	FALSE	371	357	0.962264	77	3	0.038961
3	42804480	-	HIGD1A	FALSE	1758	1681	0.9562	77	3	0.038961
6	19837371	+	ID4	FALSE	969	739	0.762642	155	6	0.0387097
8	85220354	-	RBIS	FALSE	17326	15838	0.897419	513	22	0.0384877
6	43575902	-	XPO5	FALSE	236	220	0.932203	26	1	0.0384615
13	19782964	-	PSPC1	FALSE	109	102	0.93578	26	1	0.0384615
19	36115458	+	TBCB	FALSE	464	458	0.987069	26	1	0.0384615
15	41972543	-	EHD4	FALSE	176	174	0.988636	26	1	0.0384615
6	110179641	-	WASF1	FALSE	129	123	0.953488	26	1	0.0384615
21	33641733	-	CRYZL1	FALSE	746	699	0.936997	52	2	0.0384615
X	44873214	+	KDM6A	FALSE	195	163	0.835897	52	2	0.0384615
11	809941	+	RPLP2	FALSE	145	143	0.986207	26	1	0.0384615
11	506796	-	RNH1	TRUE	137	128	0.934307	26	1	0.0384615
17	21126939	+	DHRS7B	FALSE	492	453	0.920732	26	1	0.0384615
12	120438124	+	COX6A1	FALSE	1010	342	0.338614	234	9	0.0384615
X	120560689	-	CUL4B	FALSE	172	162	0.94186	26	1	0.0384615
20	63956416	-	UCKL1	TRUE	208	189	0.908654	26	1	0.0384615
14	102087126	-	HSP90AA1	FALSE	491	449	0.91446	52	2	0.0384615
1	246566208	-	TFB2M	FALSE	368	303	0.82337	26	1	0.0384615
7	22822755	-	TOMM7	FALSE	118	90	0.762712	26	1	0.0384615
1	155911349	-	RIT1	TRUE	441	418	0.947846	26	1	0.0384615
X	134373346	+	PHF6	FALSE	975	487	0.499487	26	1	0.0384615
17	48893413	+	ATP5MC1	FALSE	95	4	0.0421053	26	1	0.0384615
X	48897742	-	TIMM17B	FALSE	57	13	0.22807	26	1	0.0384615
19	23274216	-	ZNF724	FALSE	156	131	0.839744	78	3	0.0384615
7	23182034	+	NUP42	FALSE	261	245	0.938697	26	1	0.0384615
4	53377657	+	FIP1L1	FALSE	168	162	0.964286	26	1	0.0384615
7	27143691	-	HOXA5	FALSE	696	627	0.900862	104	4	0.0384615
21	39349054	-	HMGN1	TRUE	3469	3404	0.981263	104	4	0.0384615
9	113410380	-	POLE3	FALSE	206	168	0.815534	26	1	0.0384615
X	23667547	+	PRDX4	FALSE	729	713	0.978052	26	1	0.0384615
11	124622879	+	TBRG1	FALSE	150	141	0.94	26	1	0.0384615
8	80486282	+	ZBTB10	FALSE	79	75	0.949367	26	1	0.0384615
17	10697538	-	SCO1	FALSE	442	264	0.597285	26	1	0.0384615
1	100133153	+	TRMT13	FALSE	351	344	0.980057	26	1	0.0384615
X	93673604	-	NAP1L3	FALSE	1569	1519	0.968133	52	2	0.0384615
3	15427503	-	METTL6	FALSE	155	136	0.877419	26	1	0.0384615
17	48626312	-	HOXB9	FALSE	167	151	0.904192	26	1	0.0384615
13	45341227	-	TPT1	FALSE	188	102	0.542553	26	1	0.0384615
8	116874785	-	RAD21	FALSE	308	271	0.87987	26	1	0.0384615
7	22822811	-	TOMM7	FALSE	108	44	0.407407	26	1	0.0384615
2	108449225	+	GCC2	TRUE	200	190	0.95	26	1	0.0384615
16	58198149	-	CSNK2A2	FALSE	65	61	0.938462	52	2	0.0384615
6	43517078	+	POLR1C	FALSE	709	672	0.947814	26	1	0.0384615
1	151327381	-	PI4KB	FALSE	276	177	0.641304	26	1	0.0384615
9	37592590	-	TOMM5	FALSE	631	538	0.852615	26	1	0.0384615
14	90256558	+	PSMC1	FALSE	475	371	0.781053	26	1	0.0384615
3	49940145	+	RBM6	FALSE	121	112	0.92562	26	1	0.0384615
1	71081286	-	ZRANB2	FALSE	106	96	0.90566	26	1	0.0384615
7	28686133	+	CREB5	FALSE	51	46	0.901961	26	1	0.0384615
1	1399336	-	CCNL2	FALSE	875	834	0.953143	26	1	0.0384615
20	34876614	+	ACSS2	TRUE	180	167	0.927778	26	1	0.0384615
11	59810757	-	MRPL16	FALSE	157	111	0.707006	26	1	0.0384615
10	94362956	-	NOC3L	FALSE	44	28	0.636364	26	1	0.0384615
19	38930761	-	SARS2	TRUE	130	122	0.938462	26	1	0.0384615
1	164559457	+	PBX1	FALSE	260	228	0.876923	26	1	0.0384615
15	48331435	+	DUT	FALSE	335	327	0.976119	26	1	0.0384615
X	102599185	+	ARMCX5	FALSE	118	110	0.932203	26	1	0.0384615
17	41812989	+	FKBP10	TRUE	353	342	0.968839	52	2	0.0384615
19	12163063	+	ZNF136	FALSE	114	108	0.947368	52	2	0.0384615
19	42217704	-	DEDD2	FALSE	1253	942	0.751796	26	1	0.0384615
17	782299	-	GLOD4	FALSE	280	261	0.932143	26	1	0.0384615
4	105708667	-	INTS12	FALSE	212	198	0.933962	26	1	0.0384615
20	44960396	-	TOMM34	FALSE	242	232	0.958678	26	1	0.0384615
6	107459533	-	PDSS2	FALSE	104	91	0.875	26	1	0.0384615
2	26786067	+	CENPA	FALSE	922	879	0.953362	78	3	0.0384615
9	21994939	-	CDKN2A	FALSE	233	216	0.927039	26	1	0.0384615
[truncated: 29,894 more rows]

## Sheet: 2. Low m6Am (mRNA)
Note: only m6Am sites >= 50 reads mapped are shown.
Chr	Position (hg38, 1-based)	Strand	Gene	CCD841	HCT116	K562	HepG2	HEK293T	A549	Huh7	HT29	Jurkat
1	1231972	-	SDF4	0.642251	0.615385	0.75	0.815196	0.717489	0.802469	0.797503	0.758389	0.738299
1	1231980	-	SDF4	0.550549			0.521051	0.641026
1	1231984	-	SDF4	0.685212	0.622588	0.717579	0.703291	0.634865	0.809351	0.656254	0.854402	0.776911
1	1375191	-	AURKAIP1					0.633094		0.720588
1	1407246	-	MRPL20	0.765443	0.671642		0.666667	0.790934	0.797688	0.786885	0.896552	0.916437
1	1891087	-	GNB1	0.5307	0.606278	0.777778	0.794961	0.783439	0.839552	0.807906	0.708904	0.82251
1	2391554	-	MORN1		0.881356			0.789869	0.774194	0.802326	0.931507	0.885769
1	2526596	-	PANK4	0.947368	0.869565	0.793388		0.944162		0.938036		0.954909
1	6701813	-	DNAJC11		0.78	0.833333	0.844828	0.893204		0.898765	0.896104	0.939536
1	7771327	+	VAMP3	0.743119			0.783784	0.780952		0.741379
1	7961677	+	PARK7	0.637603	0.603916	0.666667	0.618528	0.633943	0.664907	0.580868	0.738197	0.571536
1	7961681	+	PARK7	0.729692	0.860119	0.724138	0.714608	0.798555	0.809249	0.814577	0.873832	0.846186
1	7961723	+	PARK7	0.820616	0.923077	0.880342	0.709692	0.920732	0.928144	0.95619	0.864706	0.948611
1	7962773	+	PARK7	0.0117313	0.0392157	0.00719424	0.0136084	0.00933126	0.00252525	0	0.00757576	0.00980392
1	7962775	+	PARK7	0.0192308		0.0188679	0.00769231	0.00446429	0.00740741
1	7962780	+	PARK7	0.0136342	0	0	0.00856266	0	0	0	0	0.0123457
1	7962782	+	PARK7	0.00420168	0		0	0.00497512	0
1	8026308	-	ERRFI1		0.578369		0.742424			0.755319
1	8878638	-	ENO1	0.210296			0.152024	0.686747	0.612903
1	8878658	-	ENO1	0.603863	0.563636	0.792899	0.459681	0.793403	0.809054	0.689793	0.77027	0.753948
1	8878660	-	ENO1	0.808516	0.754645	0.856397	0.797174	0.867116	0.881067	0.730064	0.79223	0.819745
1	8878664	-	ENO1	0.623144	0.7	0.764706	0.563297	0.869324	0.762557	0.739407	0.689873	0.877728
1	8878667	-	ENO1	0.507426	0.358209	0.731707	0.313707	0.516517	0.388158	0.477935	0.467742	0.640877
1	8878708	-	ENO1	0.781281	0.810515	0.828767	0.858012	0.887078	0.816456	0.904878	0.931579	0.878423
1	9234774	+	H6PD	0.708818			0.903758	0.846535		0.877049		0.873915
1	9943359	-	LZIC	0.799988	0.871246	0.866019	0.926034	0.906744	0.949561	0.909567	0.909459	0.949461
1	10032965	+	UBE4B	0.916896	0.745455	0.903704	0.937875	0.933824	0.970149	0.936337	0.909836	0.948592
1	10399043	+	PGD	0.598118			0.984375	0.83871	0.578571	0.872727
1	10399674	+	PGD						0.424107
1	10399684	+	PGD						0.567568
1	11012664	+	TARDBP				0.956522	0.875817		0.703704
1	11273497	+	UBIAD1	0.825701	0.739726	0.810997	0.917011	0.908419	0.951368	0.947166	0.933126	0.937621
1	11926393	-	KIAA2013				0.957627	0.858824		0.728395		0.8
1	15847812	+	SPEN									0.785714
1	17054022	-	SDHB	0.572917		0.792208	0.518072	0.791398
1	17054034	-	SDHB	0.956044	0.77907			0.966538		1		0.96824
1	17439669	-	RCC2	0.4	0.794702	0.861789	0.556	0.84918	0.846154	0.798889	0.666667	0.878646
1	17439694	-	RCC2			0.806452		0.790698		0.791045		0.857808
1	17439719	-	RCC2			0.784722	0.814815	0.850394	0.931373	0.964174		0.904055
1	17439721	-	RCC2		0.71796	0.711819	0.875592	0.852263	0.919855	0.909759	0.808554	0.942726
1	19597022	+	MICOS10	0.881356		0.91358		0.870056		0.765378	0.729412	0.8375
1	19597043	+	MICOS10	0.754717		0.909091	0.839286	0.837423		0.741379	0.823529	0.655738
1	19597044	+	MICOS10			0.72549		0.704918
1	19597046	+	MICOS10			0.786026	0.772727	0.822989		0.880357	0.813333	0.813455
1	20786663	-	HP1BP3	0.764302	0.870811	0.833333	0.871097	0.901278	0.936893	0.916667	0.901408	0.969121
1	21440137	+	NBPF3	0.698684	0.814286			0.867384
1	22052697	+	CDC42	0.673511	0.730769		0.686747	0.611465	0.719512
1	22052700	+	CDC42	0.869953	0.868421	0.764706	0.865284	0.864583	0.861607	0.878788		0.927835
1	22052733	+	CDC42	0.59322	0.714286		0.494624	0.6	0.476923	0.743662	0.625698	0.785241
1	22052735	+	CDC42				0.831325	0.770992		0.742293	0.678261	0.7941
1	23344243	-	HNRNPR					0.424051
1	23344249	-	HNRNPR	0.71875			0.505495	0.882838	0.898734			0.885246
1	23344265	-	HNRNPR	0.481935		0.819672	0.555561	0.787778	0.673913
1	23559436	-	ID3	0.792148	0.818182		0.911111		0.917526	0.908321		0.952319
1	23559529	-	ID3	0.656264	0.749081	0.857143	0.853815	0.918848	0.801128	0.852105		0.911972
1	23980367	-	SRSF10	0.745763				0.81405		0.885714	0.870968	0.833333
1	24930273	-	RUNX3	0.747807	0.82593			0.853846				0.951801
1	25232476	-	SYF2					0.265306		0.103448		0.202381
1	25232481	-	SYF2	0.556074	0.653203		0.563553	0.559259	0.521739	0.462113	0.72973	0.756245
1	25232484	-	SYF2	0.485741	0.515306	0.392157	0.532398	0.566922	0.526316	0.505747	0.54386	0.651389
1	25247485	-	RSRP1	0.727273		0.852941		0.90411
1	25338319	+	TMEM50A	0.732558			0.765625	0.815068				0.907692
1	25906408	-	STMN1	0.769841	0.890323	0.900901	0.805825	0.914586	0.862745	0.862598		0.924839
1	25906417	-	STMN1	0.690467	0.866038	0.770723	0.712343	0.810952	0.860995	0.888768	0.878232	0.951391
1	26169927	+	ZNF593	0.907015	0.871359	0.799267	0.970517	0.953909	0.958385	0.97209	0.957826	0.967486
1	26472420	+	HMGN2	0.870117	0.797872	0.827411	0.95336	0.930972	0.923551	0.933979	0.893772	0.914059
1	26863140	+	SFN		0.772727				0.765625		0.882353
1	26863147	+	SFN		0.714286				0.915493		0.909091
1	26863149	+	SFN		0.785451		0.907826		0.89824	0.906609	0.912123
1	26890274	-	GPN2	0.841407	0.790925	0.878412	0.928654	0.907347	0.937753	0.88869	0.915978	0.968272
1	26890283	-	GPN2	0.858812	0.659606	0.931548	0.952378	0.924969	0.932997	0.902482	0.877707	0.923716
1	27155125	-	SLC9A1	0.880599	0.723242		0.928377	0.877395	0.882979	0.887165	0.804511	0.836905
1	27322291	+	TMEM222	0.833333	0.74		0.915312	0.900621	0.966667	0.919192		0.949438
1	27490136	-	WASF2	0.648148				0.875		0.886076	0.881356	0.952
1	27914545	-	RPA2		0.691176	0.855856	0.796875	0.897597	0.787879	0.89375		0.78144
1	27914549	-	RPA2	0.508881	0.633468	0.558714	0.505439	0.46847	0.660819	0.388384	0.753427	0.783079
1	27914575	-	RPA2	0.825226	0.790074	0.849775	0.937425	0.905642	0.926606	0.905241	0.870447	0.955023
1	28233026	-	DNAJC8	0.820961	0.799781	0.879859	0.940065	0.907558	0.919162	0.86335	0.936293	0.908403
1	28236135	+	ATP5IF1	0.742421	0.746575	0.81768	0.812631	0.780011	0.807692	0.743849	0.915254	0.786517
1	28236156	+	ATP5IF1	0.471698	0.78481		0.661017	0.855422			0.848485	0.807692
1	28236177	+	ATP5IF1	0.775862	0.915493	0.915033	0.745098	0.914511		0.949309	0.890625	0.957201
1	28236180	+	ATP5IF1	0.651685		0.886792	0.735294	0.873529		0.870704	0.804348	0.967213
1	28329036	+	MED18	0.821429	0.731183		0.899538	0.881818	0.919753	0.847619		0.935185
1	28329039	+	MED18	0.75254			0.869565	0.873016	0.77193			0.886364
1	28329040	+	MED18	0.787763	0.841121	0.75	0.947532	0.90458	0.863636	0.8	0.809524	0.920698
1	28438150	+	PHACTR4	0.759391	0.637681		0.836869	0.631579	0.792453		0.657658
1	31065663	-	PUM1				0.836019	0.723684	0.722222	0.641026		0.765609
1	31296782	-	SNRNP40	0.859341	0.785937	0.888889	0.951143	0.904716	0.96648	0.886387	0.927966	0.94023
1	31644884	-	PEF1					0.773167		0.878788	0.873016	0.840909
1	32108058	+	KPNA6	0.731596	0.890625		0.726961	0.859043	0.910891	0.80597		0.865672
1	32179675	+	TXLNA	0.797547			0.944444	0.950442	0.937984	0.903966	0.970588	0.96105
1	32222435	+	EIF3I	0.3125			0.282197	0.854902
1	32650541	-	ZBTB8OS	0.809917	0.752132	0.875776	0.88112	0.901313	0.915888	0.952803	0.918239	0.932687
1	32651214	+	RBBP4	0.80018	0.82963	0.806452	0.838224	0.872727	0.923077	0.888889	0.776316	0.962902
1	32817329	-	YARS1	0.831791	0.780645	0.794643	0.933367	0.910294	0.928571	0.8412	0.887417	0.931691
1	32817338	-	YARS1	0.833929	0.735294	0.924242		0.920443		0.927083	0.87931	0.940385
1	33036867	-	AK2	0.671429	0.659794	0.454545	0.619048	0.646481	0.631579	0.691352	0.688623	0.642644
1	34859771	-	SMIM12					0.790123
1	34859778	-	SMIM12	0.848485	0.745455		0.925234	0.910985	0.980392	0.943182		1
1	35031690	-	ZMYM6	0.88261	0.771084	0.820225	0.96375	0.883951	0.962264			0.942529
1	35193115	-	SFPQ	0.0260184			0.0310087	0.0823529	0.0379747			0.1
1	35193118	-	SFPQ	0.0133333			0.0128205	0.028169	0.0217391	0.0232558		0.0617647
1	35193129	-	SFPQ	0.274643	0.749722	0.716738	0.444843	0.770606	0.749235	0.911953	0.84676	0.920445
1	35193136	-	SFPQ	0.367939	0.388889	0.671429	0.183529	0.811538	0.717742	0.84375		0.88908
1	35641525	-	PSMB2	0.755071	0.874016	0.982456	0.857286	0.943077	0.924528	0.969709	0.992063	0.972109
1	35641526	-	PSMB2	0.825483	0.771906	0.878149	0.931937	0.941855	0.944258	0.91595	0.873853	0.876386
1	35641538	-	PSMB2	0.777461	0.82177	0.825175	0.942564	0.906643	0.90642	0.927388	0.894737	0.898375
1	35883209	+	AGO1	0.719298				0.838983
1	36224448	+	THRAP3	0.740872	0.650943	0.738462	0.717046	0.749417	0.752747	0.747024	0.806452	0.846798
1	36397914	-	LSM10	0.79875	0.831325		0.911765	0.920573	0.910256			0.971429
1	36464357	-	MRPS15					0.818182		0.745098
1	37595933	-	GNL2	0.280899			0.310811	0.705882
1	37595944	-	GNL2	0.745455				0.914286
1	37690523	-	AIRIM	0.833426	0.955801	0.775591	0.843463	0.807445	0.976526	0.817041	0.862385	0.89393
1	37692534	+	CDCA8	0.844595	0.75	0.898876	0.916156	0.929303	0.925926	0.920504	0.875	0.954952
1	38012739	+	UTP11		0.62069	0.813559		0.912568		0.913043		0.916599
1	38012755	+	UTP11	0.797619		0.940171	0.882353	0.88968	0.759259	0.875	0.893939	0.9116
1	38012776	+	UTP11	0.626506	0.745763	0.867647	0.751208	0.896785	0.875	0.868132	0.964706	0.956204
1	38873374	-	MYCBP	0.73	0.830189	0.888889	0.880952	0.89011	0.907895	0.938776	0.979798	0.900585
1	39026313	+	NDUFS5					0.7
1	39026376	+	NDUFS5	0.809938	0.807217	0.924755	0.939636	0.887237	0.8838	0.713006	0.756048	0.794873
1	39026378	+	NDUFS5	0.441311	0.439132	0.646388	0.706281	0.556908	0.46875	0.216667	0.319488	0.335267
1	39026382	+	NDUFS5	0.751004	0.718047	0.885417	0.930813	0.899109	0.927981	0.829525	0.797619	0.861319
1	39026388	+	NDUFS5				0.493976	0.666667
1	39158864	+	MACF1	0.769231		0.950495	0.982211		0.944444	0.979827	1
1	39738884	+	PPIE	0.854369	0.886179	0.837209		0.775574	0.804598
1	40040787	+	CAP1					0.733333		0.625
1	40258211	+	ZMPSTE24					0.639344		0.586667
1	40258247	+	ZMPSTE24					0.464789
1	40862359	-	CITED4				0.617647
1	40862365	-	CITED4	0.706627			0.817175	0.778846	0.821429
1	42658447	+	PPIH		0.754386	0.864865	0.896552	0.893287	0.907692	0.917326	0.887324	0.911995
1	42658464	+	PPIH					0.544444				0.630769
1	42682394	+	YBX1					0.621622
1	42958860	-	SLC2A1	0.626575			0.71343	0.8625
1	42958861	-	SLC2A1	0.775607	0.833131	0.894569	0.844212	0.920314	0.94325	0.967339	0.917411	0.968685
1	42958865	-	SLC2A1	0.629047	0.768116		0.702409	0.940594	0.761905
1	42958867	-	SLC2A1	0.345139	0.562513	0.478873	0.541069	0.629371	0.699659	0.75	0.68559	0.855072
1	42958868	-	SLC2A1	0.730108	0.815716	0.865953	0.850975	0.929284	0.938559	0.938848	0.9225	0.965099
1	42958913	-	SLC2A1	0.67955			0.811896
1	43172289	-	EBNA1BP2	0.765432				0.664474		0.852459		0.829545
1	43172295	-	EBNA1BP2	0.530303				0.748603	0.790323			0.840336
1	43172296	-	EBNA1BP2	0.423077			0.396552	0.789809	0.607143
1	43358956	+	CDC20					0.821429		0.75		0.77381
1	43368002	-	ELOVL1	0.719298			0.850575	0.697479		0.782051
1	43974962	+	ATP6V0B	0.75				0.905028		0.949763	0.973333	0.914286
1	44355256	-	ERI3					0.720339
1	44631968	+	RNF220		0.547619	0.487805		0.714628	0.760331	0.767889
1	44739838	+	KIF2C					0.746988
1	44739852	+	KIF2C	0.698413	0.777778	0.863636	0.94	0.902027	0.923729	0.895727	0.90678	0.916053
1	44775547	+	RPS8	0.718023	0.86631	0.872951	0.722609	0.923452	0.908795	0.949153	0.859155	0.975309
1	45011345	-	HECTD3	0.767857
1	45340221	+	TOE1		0.790323	0.753846	0.919125	0.907323	0.901639	0.897321	0.936	0.936222
1	45521854	-	PRDX1	0.268657	0.745098	0.932432	0.322008	0.92129	0.715	0.865521	0.914286	0.842197
1	45521911	-	PRDX1	0.75	0.87037		0.792208	0.908257	0.9
1	45521920	-	PRDX1	0.787833	0.806215	0.875433	0.920093	0.906569	0.901745	0.942985	0.928	0.953623
1	45584046	+	NASP	0.836607	0.946996	0.941685	0.738235	0.955009	0.962145	0.966596	0.971098	0.977031
1	45686518	-	GPBP1L1	0.855556		0.764706	0.920443	0.919355		0.851351		0.897509
1	45686519	-	GPBP1L1	0.84058			0.87423	0.804348		0.774648		0.841121
1	45688110	-	GPBP1L1		0.772727	0.832	0.911765	0.926154	0.946667
1	46303651	+	UQCRH	0.770607	0.773191	0.823256	0.915417	0.88631	0.873668	0.937605	0.902288	0.8935
1	46303681	+	UQCRH	0.681944	0.587719	0.566038	0.563852	0.672	0.671141	0.660377		0.845361
1	46303693	+	UQCRH	0.74507	0.870883	0.895222	0.723188	0.927682	0.929524	0.955282	0.863458	0.968585
1	46303694	+	UQCRH	0.454758	0.784595	0.717842	0.523417	0.827493	0.741379	0.889989	0.819149	0.902451
1	46303712	+	UQCRH	0.680556	0.663806	0.771429	0.740317	0.926829	0.822695	0.920612	0.882353	0.779221
1	47333946	+	CMPK1				0.782162	0.647059	0.886792	0.831801	0.806452
1	52033781	-	KTI12	0.798319			0.895264	0.85625	0.924242	0.950495		0.929412
1	52055208	-	TXNDC12	0.784091			0.765957		0.916667
1	52055209	-	TXNDC12	0.711446			0.643229		0.794521		0.836364
1	52055210	-	TXNDC12	0.779578		0.873874	0.796417		0.86747		0.880366
1	52055214	-	TXNDC12	0.68254			0.721311		0.813953		0.9
1	52055216	-	TXNDC12				0.618182
1	52404406	-	ORC1	0.771429	0.796117	0.866316	0.889959	0.903226	0.924399	0.939995	0.897043	0.947283
1	52404417	-	ORC1	0.77027	0.789474	0.847701	0.933475	0.924377	0.91623	0.957588	0.940171	0.936268
1	52404602	+	PRPF38A	0.831346	0.799396	0.75102	0.954997	0.915743	0.948221	0.940264	0.910764	0.946495
1	52404604	+	PRPF38A	0.502911	0.641026	0.777778	0.480539	0.896211	0.780645	0.904265	0.706667	0.969075
1	52404607	+	PRPF38A	0.641304	0.677966	0.565789	0.551638	0.885144	0.762887	0.853659		0.876389
1	52553097	-	TUT4	0.75	0.8	0.851351	0.846047	0.895028	0.946667	0.880164		0.92587
1	53014939	+	SCP2	0.602583	0.718204	0.673016	0.618041	0.555633	0.777816	0.582305	0.799591	0.812451
1	53014940	+	SCP2	0.701811	0.807143	0.887755	0.846154	0.864227	0.824561	0.920366	0.889764	0.888199
1	53014947	+	SCP2	0.723574	0.87026	0.868391	0.914147	0.894654	0.927644	0.931758	0.956066	0.967539
1	53014948	+	SCP2	0.629797	0.879269	0.950355	0.793671	0.894003	0.918919	0.955908	0.92869	0.952518
1	53014960	+	SCP2	0.723713	0.900901	0.908602	0.867302	0.927909	0.917526	0.964969	0.876365	0.959531
1	53014979	+	SCP2	0.562547	0.68	0.771429	0.720255	0.842541	0.797753	0.887695	0.816279	0.900884
1	53014984	+	SCP2	0.78964			0.93266	0.964286		0.971528	0.974483	0.978495
1	53014988	+	SCP2	0.744914	0.838578	0.876712	0.939042	0.915341	0.895105	0.971992	0.982517	0.956394
1	53014996	+	SCP2	0.686797			0.955297	0.831081		0.776194	0.786	0.820662
1	53015009	+	SCP2	0.704748	0.814815		0.865248	0.950392	0.836066	0.963915	0.955469	0.970934
1	53015011	+	SCP2	0.519323	0.759259		0.790176	0.897331	0.766234	0.948039	0.879979	0.956179
1	53196828	+	CPT2	0.788235				0.850806		0.902913	0.888889	0.942029
1	53196851	+	CPT2	0.768131			0.953846	0.882353		0.884058	0.969388	0.923377
1	53238477	-	MAGOH	0.692308	0.872727	0.806818	0.890156	0.931548	0.86	0.891424	0.942759	0.961111
1	53238478	-	MAGOH	0.71344	0.811765	0.906832	0.878774	0.910518	0.883721	0.86483	0.923799	0.92165
1	53238518	-	MAGOH	0.78663	0.850417	0.911855	0.959776	0.92571	0.948564	0.91905	0.952842	0.964228
1	55039528	+	PCSK9		0.755102		0.938159		0.903846	0.950164
1	55039566	+	PCSK9		0.726943		0.906082			0.904404
1	58784043	-	JUN	0.703655	0.668116	0.645299	0.85574	0.68226	0.835615	0.755191	0.816764	0.567367
1	61082567	+	NFIA					0.671053
1	61725140	-	TM2D1	0.480644	0.535714	0.491228	0.428781	0.477019	0.448052	0.516708	0.538462	0.557619
1	62437051	+	USP1	0.730159			0.831364	0.878472	0.803279			0.888889
1	65067715	-	JAK1					0.642857
1	66332183	+	PDE4B	0.641026
1	66332245	+	PDE4B	0.762712	0.662447				0.791667
1	67430418	-	SERBP1	0.805053	0.863799	0.822034	0.80873	0.802419	0.910569	0.708333	0.911492	0.882883
1	67685215	+	GADD45A		0.728	0.828125	0.882761	0.853955		0.988235	0.884058
1	67685237	+	GADD45A	0.752707	0.747664	0.814286	0.894331	0.868298	0.877193	0.833333	0.788732
1	70205579	-	LRRC40	0.775048	0.831746		0.911392	0.897025	0.924324	0.911094	0.912621	0.931862
1	70205724	+	SRSF11	0.631909	0.811155	0.740091	0.643501	0.682856	0.823224	0.747626	0.830663	0.874145
1	70221479	+	SRSF11	0.811594	0.804535	0.886364	0.884432	0.827387	0.907692	0.787736	0.798851	0.816824
1	70354711	-	ANKRD13C	0.835443	0.480769		0.926471	0.551402		0.465753		0.485714
1	70354718	-	ANKRD13C	0.791356	0.747126		0.786902	0.787989	0.821429	0.784946		0.878788
1	71081027	-	ZRANB2	0.475248	0.686275	0.709677	0.511437	0.692427	0.666667	0.578947		0.750727
1	71081031	-	ZRANB2	0.782062	0.850794	0.838095	0.81794	0.933455	0.933333	0.960441	0.920188	0.959096
1	74198268	+	FPGT	0.74
1	74732982	-	CRYZ				0.588393		0.710145	0.923202	0.933333
1	74733011	-	CRYZ	0.769212	0.752577	0.859797	0.909028	0.925494	0.914732	0.933068	0.932576
1	74733027	-	CRYZ	0.784	0.6625	0.418182	0.834602	0.631336	0.731061	0.719946	0.655738	0.410488
1	74733028	-	CRYZ	0.735498			0.748611	0.770833	0.746479	0.659341
1	74733030	-	CRYZ	0.767595	0.810811	0.87037	0.829713	0.832049	0.779412	0.817395	0.8625	0.824311
1	74733039	-	CRYZ	0.675	0.819672	0.870968	0.785959	0.889855	0.783019	0.94439	0.816514	0.988235
1	75724758	+	ACADM	0.746003	0.877821	0.890971	0.927882	0.931899	0.942857	0.960679	0.973351	0.919278
1	77219414	-	PIGK					0.780769
1	77979034	-	FUBP1					0.728571				0.955882
1	77979098	-	FUBP1	0.77551	0.740741	0.893617	0.897259	0.900735	0.905405	0.894231	0.927536
1	77979106	-	FUBP1	0.716736	0.766234	0.773913	0.785922	0.87037	0.884956	0.95159	0.933434	0.962025
1	78004910	+	DNAJB4	0.759615	0.774661	0.762887		0.842697	0.915966	0.93936	0.87931	0.915075
1	78004938	+	DNAJB4	0.600742	0.603642	0.819277	0.868533	0.804762	0.812736	0.787268	0.811111	0.843661
1	78004939	+	DNAJB4	0.706732	0.733844	0.85034	0.899622	0.836146	0.869212	0.843008	0.917296	0.875749
1	78004942	+	DNAJB4	0.73944	0.77803	0.804284	0.896176	0.880212	0.871575	0.907929	0.888985	0.924593
1	78004949	+	DNAJB4	0.717775				0.874126	0.85	0.84
1	78004951	+	DNAJB4	0.776193		0.929825		0.919118	0.868421
1	84144269	+	PRKACB	0.873016	0.658138							0.959425
1	84144271	+	PRKACB	0.72628	0.627953				0.932203		0.864192	0.947173
1	84144273	+	PRKACB	0.703704	0.67274							0.941103
1	84144324	+	PRKACB	0.640288	0.666667							0.880412
1	84144334	+	PRKACB	0.576087	0.549065						0.764706	0.909034
1	84506198	-	GNG5	0.853375	0.745856	0.9	0.923871	0.940694	0.91	0.911307	0.930233	0.848989
1	85708388	-	ZNHIT6	0.738636			0.83871	0.911538		0.939394		0.89899
1	85708424	-	ZNHIT6	0.800488	0.782609	0.854545	0.931343	0.927043	0.907514	0.880952		0.964286
1	86396323	-	ODF2L	0.739308	0.82801	0.629032		0.748376	0.761603	0.789833	0.861175	0.846404
1	86914111	-	SELENOF	0.755282	0.8	0.827273	0.747222	0.867045	0.867647	0.930009	0.873927	0.90422
1	86914112	-	SELENOF	0.532771	0.6	0.714286	0.630833	0.76235	0.576577	0.879842	0.701754	0.757651
1	86914113	-	SELENOF	0.747641	0.824291	0.872852	0.803257	0.854775	0.84524	0.94838	0.909724	0.935647
1	86914123	-	SELENOF	0.675015	0.697368	0.859649	0.6401	0.878632	0.8	0.917355	0.765306	0.820896
1	86914328	-	SELENOF	0.648649	0.780822	0.793651	0.891187	0.84585		0.893576	0.964706	0.918919
1	88891562	-	GTF2B	0.219572	0.545455		0.191967	0.723982	0.646154	0.864407		0.884965
1	89022838	-	GBP3	0.744905							0.77193	0.917141
1	89022854	-	GBP3	0.726902					0.853211	0.827586	0.884179	0.911533
1	89022866	-	GBP3	0.759546					0.797297		0.864448	0.922828
1	89022873	-	GBP3	0.773913								0.827957
1	91021994	-	ZNF644				0.483871	0.849558
1	92832049	+	RPL5	0.745576	0.777143	0.913978	0.605422	0.903245	0.895062	0.965879	0.831169	0.933113
1	92961461	-	DIPK1A	0.798838				0.942982		0.923077		0.917808
1	93180390	-	TMED5	0.746022			0.74521	0.791159
1	93879152	-	DNTTIP2	0.764706			0.783784	0.815534				0.666667
1	93909399	-	GCLM	0.783452		0.92	0.933333	0.952381	0.919118
1	93909430	-	GCLM	0.790177	0.863173	0.923848	0.936381	0.920266	0.912945	0.914259	0.942333	0.961538
1	93909443	-	GCLM	0.77551
1	93909446	-	GCLM	0.790847
1	93909456	-	GCLM	0.73441	0.776398	0.84058	0.930826	0.881007	0.886225	0.901625	0.885052	0.869565
1	93909460	-	GCLM	0.77377			0.970588	0.924883	0.96319	0.943706
1	93909473	-	GCLM	0.74574			0.968254	0.927107	0.923325	0.946331		0.95
1	93909485	-	GCLM	0.639368	0.698113		0.906667	0.872385	0.970149	0.904409		0.880952
1	94237584	-	ARHGAP29	0.799709	0.801929		0.926651	0.895397	0.93007	0.909685	0.937602
1	94418416	+	ABCD3	0.787749			0.875438	0.867257	0.931373		0.95	0.862745
1	94927132	-	CNN3	0.735192	0.78566		0.763912	0.7888	0.76	0.834427
1	99646113	+	PALMD	0.796992		0.839506	0.909769		0.943396	0.894658
1	100133165	+	TRMT13	0.82191	0.859649	0.779528	0.905915	0.917098	0.884956		0.955882
1	100249823	-	DBT	0.741379			0.854167	0.851319		0.90848		0.896667
1	100266280	+	RTCA	0.689704		0.807018	0.814634	0.724832
1	100894811	-	EXTL2	0.755531	0.765198	0.772727	0.931612	0.866727	0.923077	0.913613	0.842105	0.889378
1	101025773	-	DPH5	0.781609	0.967213		0.907213	0.904707	0.890411	0.962503		0.918269
1	107688499	-	VAV3				0.299317	0.214286	0.228698	0.312829
1	108692336	+	PRPF38B					0.794643		0.843137		0.858407
1	109042100	-	WDR47	0.787234				0.898649				0.903614
1	109076006	-	TAF13	0.758285	0.789474	0.80303		0.836449	0.96	0.956522	0.964286	0.981818
1	109213893	+	SARS1	0.780822			0.898305	0.903416
1	109213934	+	SARS1	0.736472	0.882353		0.760417	0.893827
1	109426369	-	PSMA5	0.749457	0.772727	0.892744	0.874171	0.91779	0.799296	0.94129	0.968339	0.968469
1	109426416	-	PSMA5	0.792707	0.887953	0.906103	0.913019	0.861751	0.858757	0.93278	0.956364	0.97197
1	109426434	-	PSMA5	0.76719	0.824513	0.861111	0.904935	0.902338	0.925915	0.930271	0.901459	0.963341
1	109426471	-	PSMA5	0.691489		0.726027	0.761194	0.631929	0.832215	0.561798		0.811881
1	109619837	+	AMPD2	0.513129	0.630189	0.622951	0.7659	0.780172	0.692913	0.58547	0.42	0.668981
1	109910846	+	CSF1	0.70052			0.927711	0.9	0.793103	0.865854
1	110004088	+	AHCYL1								0.781818
1	110391002	-	SLC16A4	0.533019					0.827027
1	110407666	-	LAMTOR5	0.731707			0.852459	0.878661		0.75
1	110407669	-	LAMTOR5	0.709677	0.661017		0.925926	0.747525	0.693548	0.630631	0.5	0.545455
1	110407670	-	LAMTOR5	0.696586	0.615385		0.852959	0.849899	0.822917	0.68
1	111449254	-	WDR77	0.722222	0.791045	0.810345	0.69389	0.780059	0.866197	0.893333	0.8	0.904762
1	111449486	+	ATP5PB	0.744989	0.889394	0.909524	0.732673	0.938284	0.964706	0.95068	0.943038	0.929495
1	111449505	+	ATP5PB	0.738988	0.864583	0.844828	0.83703	0.907906	0.940476	0.828571	0.929577
1	111449514	+	ATP5PB	0.647831	0.803252	0.882698	0.861597	0.908379	0.848168	0.909136	0.948738	0.864281
1	111449517	+	ATP5PB	0.321839		0.789474	0.617098	0.872624		0.881188
1	111755702	+	DDX20	0.786695	0.915493	0.843972	0.929577	0.900878	0.946237	1	0.927273	0.974074
1	112619116	-	ST7L	0.79798		0.792208	0.961538	0.907035			0.901639	0.930952
1	112619784	+	CAPZA1	0.851939	0.764706		0.930233	0.96038	0.925373	0.957029	0.957746	0.987479
1	112619835	+	CAPZA1	0.560475		0.571429	0.703704	0.79171	0.879121	0.86498	0.779661	0.852389
1	112619837	+	CAPZA1	0.725324	0.831169	0.764706	0.887818	0.905199	0.893805	0.932967	0.842105	0.893137
1	112956193	-	SLC16A1		0.715909		0.67673	0.819484	0.891892	0.875928	0.842105	0.924242
1	112956195	-	SLC16A1	0.856061	0.773183	0.884389	0.937236	0.897163	0.942556	0.911943	0.934892	0.92533
1	114581602	-	BCAS2				0.78	0.706349		0.771429		0.909413
1	114581609	-	BCAS2	0.792069	0.793402	0.755396	0.826314	0.893048	0.867816	0.960542	0.862069	0.926473
1	114716735	-	NRAS	0.745714			0.906203	0.865714		0.896909		0.891566
1	114757960	-	CSDE1	0.758345	0.750469	0.814286	0.892064	0.778516	0.872881	0.912916	0.899061	0.905174
1	117929781	+	WDR3					0.661972
1	119140647	-	WARS2	0.85779		0.754386	0.965514	0.914197	0.947368	0.942623	0.906977	0.942029
1	120176424	-	SEC22B	0.480159			0.662338	0.858407				0.790123
1	120176432	-	SEC22B	0.672863			0.912088	0.889796		0.833333		0.861905
1	120176435	-	SEC22B	0.76634			0.91082	0.895706				0.939943
1	120176478	-	SEC22B	0.778593			0.863636	0.825806		0.954128		0.956443
1	120176497	-	SEC22B	0.755958	0.857255	0.848	0.838499	0.925373	0.89441	0.920023	0.884298	0.960703
1	120176509	-	SEC22B	0.759129	0.777778		0.906542	0.833333	0.938462	0.75	0.745763	0.719298
1	145918717	-	PEX11B	0.674419	0.679245		0.806452	0.719512
1	148952138	+	PDE4DIP	0.821881	0.740741		0.956522	0.875887	0.982143	0.915118	0.873239	0.953321
1	149812352	-	H2BC18					0.015873	0.0555556
1	149812360	-	H2BC18					0.711538
1	149812370	-	H2BC18	0.517573	0.605215	0.706622	0.744614	0.706579	0.772454	0.827266	0.801317	0.694319
1	149832657	+	H4C14		0.815871	0.791367	0.911905	0.853257	0.887314	0.93095	0.921241	0.854751
1	149886682	-	H2BC21	0.704694	0.608085	0.735825	0.89206	0.870436	0.847026	0.894111	0.860637	0.805837
1	149886918	+	H2AC20	0.730053	0.535158	0.548188	0.898841	0.825375	0.841075	0.808141	0.724048	0.737198
1	149886919	+	H2AC20	0.864671	0.800286	0.771451	0.91364	0.910481	0.920176	0.94893	0.915398	0.904029
1	149886924	+	H2AC20	0.45614	0.592684	0.739669	0.617878	0.778786	0.785305	0.871526	0.626878	0.791833
1	149887961	-	H2AC21		0.612245	0.777778	0.462194	0.769697	0.826087	0.90411	0.724762	0.816615
1	149887963	-	H2AC21	0.658271	0.64244	0.742555	0.845735	0.80184	0.843306	0.885777	0.837607	0.834473
1	149927779	-	SF3B4					0.75				0.849057
1	149927801	-	SF3B4	0.791473	0.736111		0.712644	0.901961	0.890411	0.875		0.905873
1	150235949	-	ANP32E				0.7	0.928339	0.9
1	150235956	-	ANP32E	0.706897			0.783661	0.90311	0.947368	0.955056	0.960784	0.957746
1	150235978	-	ANP32E					0.708333
1	150236063	-	ANP32E					0.436364				0.365079
1	150236083	-	ANP32E					0.836957	0.72	0.525773		0.701613
1	150236086	-	ANP32E							0.388889		0.582418
1	150268979	-	APH1A	0.782831	0.765517	0.851852	0.912751	0.927654	0.929661	0.944769	0.933333	0.934848
1	150269001	-	APH1A	0.741379				0.780069
1	150321536	+	PRPF3	0.862069	0.777778			0.935673	0.976			0.890244
1	150321556	+	PRPF3	0.873864	0.768116	0.827957	0.945205	0.91727	0.971154	0.962687	0.942308	0.955342
1	150321582	+	PRPF3					0.782609
1	150321583	+	PRPF3					0.71831		0.637931		0.640449
1	150364147	+	RPRD2	0.769231	0.72449		0.930693	0.874046	0.894737	0.790698		0.934006
1	150364170	+	RPRD2	0.72093	0.753059	0.714286	0.880254	0.840198	0.877863	0.889573	0.813333	0.941428
1	150487414	+	TARS2	0.77027	0.818182	0.793103	0.898452	0.891795	0.901515	0.921886	0.906486	0.95622
1	150487424	+	TARS2			0.736842	0.673077	0.696343	0.727273	0.605634		0.833333
1	150487435	+	TARS2	0.780425	0.842451	0.849265	0.925352	0.909605	0.912317	0.943193	0.947393	0.965774
1	150487444	+	TARS2	0.625			0.657807	0.62603	0.580247	0.556701		0.74
1	150487445	+	TARS2				0.854839	0.691589
1	150579564	-	MCL1	0.662998		0.787611	0.638889	0.751634		0.758065	0.622951	0.892857
1	150579603	-	MCL1	0.360731	0.691176	0.882353	0.402876	0.800609	0.77381	0.909091	0.522388	0.946809
1	150579610	-	MCL1	0.824763	0.795081	0.842322	0.935055	0.920031	0.937525	0.940189	0.915436	0.953897
1	150629612	-	ENSA	0.75905	0.767895	0.785714	0.871252	0.870708	0.873418	0.91064	0.831276	0.942258
1	150697122	-	GOLPH3L					0.887324	0.890625	0.847458	0.792683
1	150697156	-	GOLPH3L	0.429009	0.4424	0.712766	0.518868	0.574594	0.498069	0.66509	0.483871	0.65857
1	150697162	-	GOLPH3L	0.866667	0.758929	0.858974	0.917647	0.895113	0.927273	0.899038	0.905109	0.949438
1	150697189	-	GOLPH3L		0.4			0.645238	0.626506			0.485437
1	150765808	-	CTSS						0.797468		0.783505
1	151060394	+	MLLT11	0.666667				0.704225	0.698276	0.738984		0.856709
1	151190158	-	VPS72					0.663265
1	151190172	-	VPS72					0.783333
1	151190173	-	VPS72	0.797364	0.918689	0.893491	0.856387	0.917815	0.895	0.978066	0.948498	0.970414
1	151347190	-	RFX5	0.68				0.892019	0.803922			0.960065
1	151347283	-	RFX5					0.57478				0.84
1	151399582	+	PSMB4	0.784483		0.84507	0.846939	0.937788	0.951613	0.963699		0.946969
1	151399585	+	PSMB4	0.668701		0.764045	0.78661	0.84022	0.817308	0.886349		0.846793
1	151993826	-	S100A10	0.772727						0.952381	0.956522
1	151993828	-	S100A10	0.794252	0.846154		0.923082	0.948276	0.886899	0.931574	0.915283	0.984848
1	151993834	-	S100A10	0.461538						0.586207
1	151993835	-	S100A10	0.445173			0.6875	0.596154	0.5	0.684109	0.532258
1	151993839	-	S100A10	0.251164	0.236842		0.29626	0.269755	0.266963	0.211685	0.322564
1	152036945	-	S100A11	0.593686					0.793478		0.86
1	153535996	-	S100A6	0.705607	0.842697				0.826087		0.859529
1	153536000	-	S100A6	0.770398	0.693548				0.807692		0.732484
1	153536006	-	S100A6	0.515152
1	153536018	-	S100A6	0.806899	0.798578		0.889793		0.880779		0.895594
1	153545775	-	S100A4		0.560606				0.49238		0.626263
1	153545788	-	S100A4		0.0461538				0.0280374
1	153545789	-	S100A4	0.0173913	0.0320285				0.0351939		0.00671141
1	153545791	-	S100A4	0.0408163	0.0833333				0.0768846		0.0779221
1	153549268	-	S100A3	0.901639					0.798507
1	153613071	-	S100A16	0.754141	0.835859		0.907407		0.971963	0.988764	0.953947
1	153613137	-	S100A16	0.508197	0.563467		0.642336		0.649682		0.626087
1	153627531	-	S100A13	0.552371			0.514339	0.798507
1	153634059	+	CHTOP	0.792683	0.774648		0.868421	0.907781	0.842105	0.931738	0.823529	0.943925
1	153634075	+	CHTOP	0.843537	0.774163	0.823928	0.926367	0.899134	0.87394	0.900515	0.879074	0.904284
1	153670967	-	ILF2					0.344086		0.130952		0.283784
1	153670972	-	ILF2	0.847608	0.880081	0.831625	0.854078	0.876353	0.898085	0.744465	0.907201	0.852855
1	153963520	-	SLC39A1	0.766667			0.814014	0.822715	0.775281	0.830247	0.869565	0.891566
1	153967725	-	SLC39A1			0.794521	0.949153	0.907104	0.934783	0.941831	0.953271	0.970237
1	153977656	-	JTB					0.763158
1	153986343	-	RAB13	0.673813				0.905109
1	153986345	-	RAB13	0.803727	0.828571	0.863636	0.791765	0.905941	0.960396
1	153986349	-	RAB13	0.587754				0.418367
1	154183146	-	TPM3								0.8	0.764706
1	154183159	-	TPM3	0.890244				0.778761	0.733333	0.7875	0.926667	0.82963
1	154220552	-	C1orf43				0.661765	0.835206
1	154220601	-	C1orf43	0.866667				0.87931		0.8		0.761194
1	154220681	-	C1orf43	0.654515		0.767442	0.866667	0.852814	0.862595	0.902174	0.802632	0.87037
1	154220924	+	UBAP2L	0.792453	0.921053	0.98		0.964567	0.965753	0.984127		0.985714
1	154970708	-	SHC1	0.670588
1	154970709	-	SHC1	0.669782
1	154970710	-	SHC1	0.808067			0.788732		0.936
1	154970733	-	SHC1	0.696559			0.837838		0.873016
1	154970743	-	SHC1	0.713251	0.697674		0.777193		0.796791	0.730769
1	154970747	-	SHC1	0.807071	0.8		0.778947		0.814815	0.71871
1	154974337	-	SHC1	0.794118				0.684932		0.684321	0.737374
1	155140505	-	DPM3					0.90583		0.788462
1	155173238	-	KRTCAP2	0.763175	0.962264		0.896689	0.906582	0.912	0.960784		0.9125
1	155209240	+	MTX1				0.666667	0.594286		0.308824		0.34
1	155209249	+	MTX1	0.823106	0.842105	0.830508	0.897104	0.942699	0.946565	0.791209		0.83871
1	155308821	+	FDPS		0.774417	0.890244	0.947264	0.925926	0.941475	0.926387	0.907407	0.955021
1	155308870	+	FDPS	0.795181	0.766667		0.772358	0.943182		0.917808		0.928728
1	155324519	+	RUSC1	0.738101	0.837154	0.811321	0.869212	0.890102	0.844444	0.928484	0.876607	0.940857
1	155689102	+	DAP3	0.660714			0.889633	0.825911		0.833625		0.83871
1	155979128	-	ARHGEF2	0.796117						0.930233	0.910714
1	156020896	-	SSR2	0.553191			0.509091	0.851852		0.789206
1	156020907	-	SSR2	0.743211	0.732394		0.803032	0.712934	0.752381	0.708877	0.646512	0.797101
1	156020908	-	SSR2	0.666878	0.652174		0.676129	0.708215	0.715328	0.78181	0.83871	0.912281
1	156213001	+	PMF1	0.885926	0.797199	0.898551	0.909429	0.875953	0.884718	0.85024	0.915916	0.886578
1	156282807	-	SMG5	0.826056	0.730059	0.771242	0.941086	0.896104	0.924812	0.920564	0.900862	0.947414
1	156338181	-	CCT3					0.727273				0.921875
1	156338184	-	CCT3		0.73494		0.580946	0.895202	0.889474	0.846154		0.968641
1	156338237	-	CCT3	0.673077	0.75	0.8	0.640009	0.861883	0.858921
1	156338279	-	CCT3	0.838636	0.835404	0.865546	0.854687	0.844581	0.858974	0.833427	0.816092	0.783537
1	156338282	-	CCT3	0.833564	0.813869	0.855769	0.838156	0.798373	0.833333	0.856767	0.880597	0.902308
1	156338296	-	CCT3					0.712446		0.866667		0.907692
1	156601439	-	GPATCH4				0.661972	0.864528	0.831461			0.928571
1	156601467	-	GPATCH4					0.757576
1	156601470	-	GPATCH4	0.81717	0.709302	0.811881	0.891273	0.850259	0.934028	0.873786	0.908397	0.875702
1	156728416	-	ISG20L2	0.72549	0.769231	0.843373	0.877193	0.775047	0.774194	0.901054	0.853659	0.878049
1	156751664	-	HDGF				0.734375	0.841026
1	156751670	-	HDGF	0.647059			0.736842	0.876963		0.982759
1	156751674	-	HDGF	0.724138			0.888864	0.938918	0.86
1	156751697	-	HDGF	0.802817	0.906542	0.770115	0.856736	0.840391	0.858639	0.77893	0.877551	0.805187
1	156767539	+	PRCC	0.81776	0.803602	0.795371	0.922321	0.894966	0.924216	0.935068	0.8973	0.963102
1	156767580	+	PRCC					0.783784		0.68
1	159009949	+	IFI16	0.775758								0.851528
1	160031970	-	PIGM					0.829082		0.727273		0.913793
1	160262451	-	DCAF8	0.755223	0.673636	0.651007	0.926942	0.858355	0.893313	0.650663	0.827049	0.849608
1	160343219	-	COPA	0.68			0.868852	0.884298		0.84127
1	160343253	-	COPA	0.746988			0.875	0.872263
1	161045888	-	USF1					0.727273
1	161045894	-	USF1	0.805704	0.784819	0.815789	0.926814	0.874768	0.914894	0.95308	0.931707	0.962129
1	161045896	-	USF1	0.803378	0.779959	0.761665	0.931961	0.871833	0.913411	0.914797	0.899611	0.958242
1	161045898	-	USF1	0.735294	0.828947	0.813559	0.882488	0.900087	0.892157	0.957215	0.93617	0.964093
1	161045901	-	USF1					0.847368		0.771429		0.815217
1	161045949	-	USF1	0.850467	0.702383		0.929825	0.885805	0.883041	0.930283	0.846847	0.915036
1	161045964	-	USF1					0.746032				0.898305
1	161153995	+	UFC1	0.803451	0.794558	0.882682	0.941663	0.880821	0.943647	0.895361	0.936138	0.929036
1	161202383	+	NDUFS2	0.75			0.900488	0.863905		0.881356
1	161314403	+	SDHC	0.555196			0.639587	0.668367	0.71028			0.902778
1	161749768	+	DUSP12	0.784615	0.811321		0.883117	0.849265	0.841463	0.836364	0.851852	0.965517
1	162790774	+	HSD17B7		0.630769		0.892273	0.875		0.917237		0.861702
1	163321960	+	NUF2		0.745098			0.852632		0.830189		0.827869
1	163321967	+	NUF2	0.735294	0.758892	0.814527	0.94216	0.899168	0.944258	0.921046	0.908527	0.959381
1	163321974	+	NUF2		0.716418	0.821429	0.859155	0.878939	0.902174	0.890388	0.943396	0.888242
1	163321975	+	NUF2			0.636364		0.765734	0.789916			0.765107
1	163321976	+	NUF2					0.688679				0.728814
1	163321981	+	NUF2					0.789474
1	163322008	+	NUF2	0.813187	0.857132	0.798077	0.902377	0.90665	0.934343	0.916572	0.879121	0.917743
1	165631224	+	MGST3	0.799251	0.861111	0.946429	0.953833	0.946809	0.924242			0.985075
1	165768834	-	TMCO1	0.739286			0.906977	0.902655		0.865385		0.962143
1	165827616	+	UCK2	0.869631	0.87963	0.746269	0.94325	0.924868	0.962791	0.943511	0.934066	0.927094
1	169106324	+	ATP1B1				0.757616		0.909976	0.941376	0.892216
1	169106363	+	ATP1B1				0.728395		0.912281	0.923729	0.936709
1	169367789	-	NME7	0.785714	0.877778			0.896359	0.941748	0.933333	1	0.987288
1	169367990	+	BLZF1	0.826087	0.752688	0.825758	0.915132	0.879693	0.939024	0.905545	0.925713	0.946109
1	169893928	-	SCYL3	0.75	0.803922		0.786885	0.824841
1	169893935	-	SCYL3	0.745098			0.971698	0.885662	0.928571	0.941176		0.983607
1	171781674	+	METTL13	0.794872	0.686275	0.769231	0.915888	0.910125	0.92029	0.944444	0.877193	0.923077
1	172444103	-	PIGC				0.551496	0.46543	0.54386	0.352941
1	173477328	+	PRDX6	0.77451	0.921569		0.905882	0.948276		0.962963
1	173477352	+	PRDX6	0.583782	0.892857	0.820896	0.729342	0.913774	0.906475	0.947113	0.890411	0.986301
1	173477389	+	PRDX6	0.507692			0.466667	0.876289
1	173824675	+	DARS2					0.754545
1	174999468	+	CACYBP	0.780822	0.777778	0.882353	0.941176	0.89405	0.959459	0.918919	0.808824	0.921695
1	174999995	+	CACYBP	0.769356	0.825175	0.85119	0.932213	0.876143	0.915709	0.844828	0.894737	0.888117
1	175023411	-	MRPS14	0.827644	0.790323	0.93	0.777036	0.848537	0.807692	0.875		0.864583
1	175023446	-	MRPS14	0.878495	0.782178	0.896	0.97619	0.929142	0.965854	0.924522	0.955357	0.977356
1	175023459	-	MRPS14	0.775862		0.8		0.917355	0.938272	0.952359		0.964375
1	179082076	+	TOR3A	0.569453	0.618421		0.662292	0.727422	0.732877
1	179143014	-	ABL2	0.566372
1	179143050	-	ABL2	0.787234
1	179143074	-	ABL2	0.76105			0.871429		0.882843
1	179143076	-	ABL2	0.786646					0.900483
1	180502577	-	ACBD6	0.758242				0.925234
1	182839367	+	DHX9	0.455882			0.392857	0.885827	0.836364	0.942029
1	183635647	-	ARPC5	0.469483								0.792683
1	183635665	-	ARPC5	0.771773			0.961039					0.936802
1	183635734	-	ARPC5	0.743959	0.830929	0.782051	0.923577	0.880694	0.874176	0.934771	0.969431	0.953471
1	183635753	-	ARPC5	0.775544	0.787521	0.857143	0.891667	0.862745	0.864151	0.797495	0.868351	0.928942
1	183635758	-	ARPC5	0.740445	0.735849		0.790476	0.738506	0.866667	0.766234		0.838617
1	184974453	-	NIBAN1	0.887766	0.793103	0.834862		0.933775	0.971014		0.873786
1	185156932	-	TRMT1L					0.715789
1	185317208	-	IVNS1ABP	0.555078
1	185317243	-	IVNS1ABP	0.799049	0.825441	0.898072	0.950011	0.926997	0.937223	0.873742	0.950403	0.951576
1	186375847	+	ODR4	0.816228	0.761062	0.741176	0.933967	0.919698	0.942857	0.877358	0.936
1	186680423	-	PTGS2	0.389831				0.794304	0.855424		0.787336
1	186828987	+	PLA2G4A					0.798077	0.90625		0.679245
1	192809041	+	RGS2	0.712578	0.779466	0.917647	0.910714	0.935163	0.932402	0.845102	0.787081	0.863014
1	192809042	+	RGS2	0.396459	0.684211			0.808219		0.56	0.654762
1	192809043	+	RGS2	0.339451	0.604047			0.81	0.833333	0.790358	0.64751
1	192809045	+	RGS2	0.467076	0.840909			0.860927	0.84127	0.846847	0.697959
1	193059637	+	RO60	0.792683			0.901639	0.910448		0.983333
1	196652057	+	CFH							0.589714	0.703704
1	200027649	+	NR5A2						0.722222	0.865355
1	200027737	+	NR5A2							0.700828
1	200410018	-	ZNF281	0.744785	0.816214	0.80597	0.87628	0.868787	0.881579	0.911388	0.905405	0.946328
1	200410031	-	ZNF281	0.761905			0.886076	0.913043	0.816667	0.908306		0.949905
1	200410033	-	ZNF281	0.78125	0.890411		0.9375	0.930279	0.927083	0.965097		0.974239
1	201507116	-	CSRP1	0.747714			0.925099		0.932039	0.897059	0.95082
1	201829203	+	IPO9	0.820076	0.753354	0.765625	0.844124	0.803452	0.877551	0.775893	0.861751	0.780952
1	201955524	+	TIMM17A	0.665517	0.692308	0.792593	0.790739	0.789165	0.824742	0.843373		0.862069
1	201955531	+	TIMM17A	0.45283	0.169811	0.303571		0.380208	0.370968	0.534247		0.2
1	202889121	-	RABIF					0.559524	0.528302			0.54321
1	203305519	+	BTG2	0.804265	0.855891	0.79646	0.967139	0.880293	0.895833	0.919228	0.914384	0.888889
1	203626795	+	ATP2B4	0.795442	0.79661			0.938497	0.981818	0.948718		0.93382
1	203626833	+	ATP2B4	0.660287								0.898889
1	203626858	+	ATP2B4	0.772426								0.931705
1	203861611	+	SNRPE	0.782468	0.834532	0.834225	0.944728	0.866417	0.917178	0.960061	0.942308	0.93525
1	203861651	+	SNRPE	0.346154	0.578947	0.590909	0.331502	0.730645	0.540741	0.748428	0.680556	0.786057
1	203861652	+	SNRPE	0.586957	0.770115	0.8	0.544118	0.872711	0.744681	0.927723	0.722222	0.862821
1	203861657	+	SNRPE	0.288462			0.353846	0.747604	0.596154	0.8
1	203861847	+	SNRPE		0.888889	0.711538	0.742857	0.73453	0.75	0.738877	0.904255	0.891031
1	204516421	+	MDM4				0.344262	0.446809
1	205750218	-	NUCKS1	0.732725	0.737845	0.789809	0.897727	0.848485	0.855769	0.915529	0.878289	0.917351
1	205750240	-	NUCKS1	0.229508	0.470588		0.490196	0.573643	0.589744	0.74359		0.72
1	205750242	-	NUCKS1	0.38792	0.34333	0.529167	0.688172	0.555556	0.532659	0.63964	0.567708	0.529658
1	206635581	+	DYRK3	0.802342		0.880952		0.90625	0.796296			0.924242
1	207752086	+	CD46	0.800998	0.797143	0.703337	0.934839	0.865908	0.92449	0.928018	0.904477	0.936689
1	207752091	+	CD46	0.872299	0.757353	0.821429	0.931589	0.905904	0.941748	0.930715	0.931148	0.96081
1	207752109	+	CD46	0.778771	0.621009	0.774563	0.805768	0.787608	0.838091	0.733803	0.800075	0.775562
1	207752122	+	CD46	0.54952	0.61194	0.820896	0.569609	0.861502	0.8	0.91918	0.902627
1	207752134	+	CD46	0.511166	0.647887	0.768116	0.602369	0.811159	0.785714	0.90307	0.897778
1	209827974	+	UTP25	0.797264	0.872859	0.841424	0.898111	0.891892	0.925373	0.925916	0.910618	0.963201
1	209827987	+	UTP25	0.859649	0.789474	0.806897	0.853659	0.895374	0.900709	0.940476	0.910569	0.994505
1	209828009	+	UTP25					0.769231
1	212035769	+	DTL		0.850139	0.78453	0.984375	0.914082	0.951087	0.924565	0.933735	0.960344
1	212035780	+	DTL	0.774554	0.840414	0.811287	0.916814	0.859403	0.924856	0.926708	0.904942	0.944438
1	212035793	+	DTL	0.838618	0.762478	0.864839	0.944796	0.902624	0.935383	0.906222	0.897294	0.927648
1	212432896	+	NENF	0.35514	0.430769		0.642857	0.494565	0.475			0.470588
1	212950532	+	VASH2		0.75			0.901099		0.966667		0.976089
1	213015776	-	ANGEL2	0.864407	0.808824	0.815789	0.937605	0.894843	0.922581	0.950616	0.789474	0.94822
1	215567316	+	KCTD3	0.797179	0.882353		0.965444	0.913747	0.910714	0.893118	0.845238
1	217631057	-	GPATCH2	0.776471	0.696429		0.9375	0.859951	0.904255	0.948558	0.885246	0.948935
1	217631065	-	GPATCH2					0.763889
1	217631066	-	GPATCH2	0.45283			0.376344	0.768707
1	217631067	-	GPATCH2	0.821462	0.864935	0.867925	0.878699	0.912396	0.951415	0.942783	0.789519	0.970244
1	218285311	+	RRP15	0.789308	0.884855	0.822981	0.798767	0.818035	0.879393	0.844944	0.929157	0.952452
1	220089766	-	BPNT1		0.784615		0.966292	0.91002	0.885714	0.901976	0.947917	0.939472
1	220089782	-	BPNT1	0.820954	0.787219	0.858586	0.916037	0.847694	0.846154	0.892138	0.950207	0.930456
1	220089792	-	BPNT1	0.793459	0.89916	0.867925	0.927803	0.933146	0.945378	0.967563	0.914945	0.954323
1	220089794	-	BPNT1				0.862745	0.814024	0.901961	0.850746	0.84	0.781609
1	220089797	-	BPNT1	0.371753	0.64486	0.721393	0.688645	0.846374	0.806691	0.92863	0.708694	0.871049
1	220089827	-	BPNT1	0.799512	0.891624	0.909871		0.92048	0.928571	0.94494	0.960784	0.968009
1	220094115	+	IARS2	0.778947			0.913793	0.948454	0.982456	0.971698	0.984127	0.973333
1	220272370	-	RAB3GAP2	0.670213			0.916429	0.811765
1	220272430	-	RAB3GAP2	0.778587	0.962025	0.931507	0.95	0.92735	0.921053	0.948527	0.985915	0.969697
1	221742085	-	DUSP10	0.62363				0.714286		0.886872		0.954128
1	221742089	-	DUSP10	0.767092	0.846154	0.766667	0.939473	0.846652	0.919149	0.886961	0.867925	0.93831
1	221742117	-	DUSP10	0.6875	0.71831			0.88189		0.934579		0.951807
1	222712564	+	BROX	0.718137	0.769231	0.741379	0.833333	0.873913	0.872093	0.898876	0.846154	0.959459
1	223712539	+	CAPN2	0.666351				0.882353	0.764045
1	224356919	+	CNIH4					0.592593
1	224356922	+	CNIH4					0.516556	0.546512	0.279412		0.607843
1	225428821	-	LBR	0.704		0.865342	0.952547	0.927632	0.938127	0.917026	0.890803	0.925565
1	225653087	-	ENAH	0.824441			0.794872	0.941032		0.937927	0.966667
1	225924304	-	ENSG00000255835					0.767857
1	225924313	-	PYCR2	0.741379	0.820896			0.880054				0.966102
1	226186683	-	ACBD3					0.76
1	226309163	-	LIN9		0.757895	0.804511		0.878622	0.842975	0.863605	0.814815	0.883838
1	227318490	-	CDC42BPA	0.79798			0.741379	0.920398	0.940299
1	228082730	+	ARF1	0.745377	0.852144	0.877193	0.779636	0.818775	0.838655	0.936007	0.912841	0.945531
1	228082733	+	ARF1	0.457364			0.432432	0.809179
1	228082736	+	ARF1	0.333742	0.560976	0.586667	0.320354	0.571946	0.615894	0.819543	0.54321	0.790698
1	228103301	-	C1orf35	0.898305	0.863636	0.701754	0.917687	0.86556	0.9	0.948321	0.904762	0.947884
1	228109266	-	MRPL55	0.647059		0.829545	0.799038	0.835498	0.887324	0.886499	0.866667	0.894118
1	230868512	-	C1orf198	0.655085
1	230868521	-	C1orf198	0.715351	0.819208		0.964979	0.860274		0.917809	0.929688	0.9375
1	230868531	-	C1orf198	0.714286				0.951724
1	230979070	+	ARV1			0.798883		0.903658	0.91	0.931818		0.97195
1	231528649	+	TSNAX-DISC1	0.856	0.769231			0.927885	0.947761	0.927273		0.965099
1	231528663	+	TSNAX	0.895349				0.823096	0.763636
1	231528728	+	TSNAX			0.796296	0.923691	0.924242	0.969231
1	234373486	+	COA6	0.791506	0.853333	0.866337	0.890681	0.823841	0.920213	0.896065	0.911392	0.925539
1	234373491	+	COA6					0.678161	0.728814	0.888889
1	234373788	+	COA6			0.746835	0.854509	0.831361	0.803279	0.895522	0.903509	0.896907
1	234608031	-	IRF2BP2				0.787604
1	234608059	-	IRF2BP2				0.780049
1	234608090	-	IRF2BP2				0.762609	0.807018	0.688525	0.853333
1	234608102	-	IRF2BP2				0.616438
1	234608125	-	IRF2BP2				0.627119
1	234608143	-	IRF2BP2				0.726708
1	234608153	-	IRF2BP2				0.727576
1	234608179	-	IRF2BP2				0.776717
1	234610191	-	IRF2BP2					0.637838		0.596154		0.598425
1	235128854	-	TOMM20					0.661765
1	235161274	-	RBM34	0.754386				0.930886	0.933333	0.925		0.923732
1	235328602	+	GGPS1					0.731707
1	236604503	-	HEATR1	0.615283	0.590476	0.555556	0.750962	0.761057	0.753754	0.524696	0.711538	0.555556
1	236795311	+	MTR				0.779319	0.777311
1	241519728	-	FH	0.896552		0.954545	0.792208	0.978903
1	241519747	-	FH	0.797486	0.928571	0.961424	0.776183	0.969775	0.979466	0.967761	0.944099	0.97182
1	241519748	-	FH	0.745082	0.852761	0.917004	0.792191	0.928498	0.927215	0.974804	0.947018	0.953847
1	241532379	+	KMO						0.793103
1	241848197	+	EXO1					0.7951		0.785714		0.816092
1	241848227	+	EXO1	0.892473	0.785714	0.879433	0.948621	0.914399	0.918699	0.969337	0.987179	0.938462
1	244451886	-	ADSS2	0.814299	0.705882	0.835821	0.933712	0.823113	0.896024	0.840125	0.939394	0.841308
1	244451903	-	ADSS2	0.692397	0.818182		0.850133	0.805217	0.811966	0.849052	0.793478	0.832298
1	244864512	-	HNRNPU	0.878307	0.759259		0.870127	0.923188	0.859649	0.905405		0.897436
1	246566190	-	TFB2M	0.655738		0.780488	0.850877	0.872093		0.892857	0.852459
1	246566208	-	TFB2M	0.704545	0.82963	0.658333	0.795873	0.82337	0.860656	0.903445	0.892617	0.945379
1	246566224	-	TFB2M	0.754098	0.769231	0.776699	0.675214	0.896552	0.873684	0.930556
10	988436	+	GTPBP4	0.753163	0.830169	0.845977	0.913158	0.894184	0.870736	0.935131	0.923715	0.95083
10	988446	+	GTPBP4	0.837084	0.847161	0.78135	0.931285	0.8946	0.908384	0.93477	0.93456	0.941481
10	988452	+	GTPBP4	0.779118	0.819769	0.854118	0.844196	0.910594	0.911675	0.919989	0.95487	0.976945
10	988453	+	GTPBP4					0.732143
10	988480	+	GTPBP4	0.742857	0.627451		0.905882	0.84345	0.837209	0.933333	0.8	0.976784
10	988485	+	GTPBP4	0.62069	0.684932	0.828947	0.688549	0.815846	0.762821	0.888889	0.837209	0.957808
10	988487	+	GTPBP4	0.387999	0.370968	0.676471	0.405548	0.683544	0.740458	0.854839	0.813559	0.918468
10	988490	+	GTPBP4	0.5			0.635294	0.77193	0.652174			0.914899
10	1048896	-	IDI1					0.45679
10	3172779	-	PITRM1	0.652128	0.686275		0.877778	0.806252	0.831859	0.847059	0.859649	0.916746
10	3172811	-	PITRM1	0.777347				0.837563	0.807692			0.918919
10	3785185	-	KLF6	0.704762			0.809524
10	3785189	-	KLF6	0.690207			0.797887	0.932584		0.974026	0.857143
10	3785203	-	KLF6	0.750003	0.835437		0.82966	0.845029	0.88314	0.873285	0.833523	0.859155
10	3785207	-	KLF6	0.67368	0.7375		0.749906	0.855769	0.840426	0.849632	0.828125
10	3785215	-	KLF6	0.703125	0.666667		0.689343	0.780142	0.81295	0.904762	0.828125
10	3785230	-	KLF6	0.655826	0.639935		0.77928	0.84153	0.840491	0.818544	0.736991	0.876471
10	3785231	-	KLF6	0.655717	0.678791	0.786127	0.781577	0.834112	0.850002	0.848677	0.783621	0.912905
10	3785235	-	KLF6	0.463089	0.609375		0.485229	0.541096	0.580645	0.785714
10	3785237	-	KLF6	0.649573	0.663265		0.854167	0.801653	0.839286	0.916667
10	4963415	+	AKR1C1	0.845711	0.913043	0.786727	0.936557	0.898936			0.916822
10	4963417	+	AKR1C1	0.768476	0.807692	0.859568	0.864341	0.905473	0.907493	0.93867	0.924883
10	4963419	+	AKR1C1	0.700561		0.879864	0.77588	0.894737	0.864621	0.92085	0.838678
10	4963426	+	AKR1C1				0.0622782		0.283186	0.34375
10	4963435	+	AKR1C1				0.389405		0.636364	0.77037
10	4963439	+	AKR1C1				0.217069		0.542105	0.536585
10	4963441	+	AKR1C1				0.353094		0.741062	0.808858	0.845238
10	4963443	+	AKR1C1				0.0787047		0.140785	0.0973451
10	4963444	+	AKR1C1				0.0451716		0.0855671	0.0925926
10	4963445	+	AKR1C1				0.143176		0.393103	0.363636
10	4963449	+	AKR1C1				0.158781		0.248731	0.0963855
10	4963454	+	AKR1C1				0.0711419		0.103261	0.0405405
10	4963455	+	AKR1C1				0.0314318		0.0319453	0.09375
10	4963456	+	AKR1C1				0.0342169		0.0489659	0.09375
10	4963458	+	AKR1C1				0.0503371		0.0982659	0.0967742
10	4963718	+	AKR1C1						0.793478
10	4963739	+	AKR1C1						0.754717
10	5003795	-	AKR1C2						0.650246
10	5003811	-	AKR1C2						0.189474
10	5003819	-	AKR1C2						0.10274
10	5003824	-	AKR1C2				0.0167004		0.0606133
10	5003825	-	AKR1C2				0.0170988		0.0273675
10	5003826	-	AKR1C2				0.12985		0.0679329
10	5003831	-	AKR1C2				0.171875		0.335386
10	5003835	-	AKR1C2				0.132075		0.354162
10	5003836	-	AKR1C2				0.0371401		0.0944222
10	5003837	-	AKR1C2				0.1279		0.219
10	5003839	-	AKR1C2				0.642267		0.799821	0.901408	0.910256
10	5003841	-	AKR1C2				0.541176		0.636951
10	5003845	-	AKR1C2				0.375009		0.463366
10	5003850	-	AKR1C2				0.120074		0.356992		0.604938
10	5003853	-	AKR1C2				0.0155039		0.0558464
10	5003854	-	AKR1C2				0.383896		0.719103	0.72549	0.737931
10	5003863	-	AKR1C2				0.437294		0.26851		0.56
10	5003865	-	AKR1C2						0.712644
10	5017999	-	AKR1C2						0.684685
10	5018024	-	AKR1C2						0.753086
10	5094391	+	AKR1C3				0.671517		0.717147		0.856087
10	5094399	+	AKR1C3						0.53211
10	5094404	+	AKR1C3				0.647059		0.679389		0.563636
10	5094405	+	AKR1C3				0.5		0.422122		0.162162
10	5094431	+	AKR1C3						0.608365
10	5094433	+	AKR1C3				0.634909		0.709219		0.760442
10	5094434	+	AKR1C3						0.201521
10	5094438	+	AKR1C3						0.41502
10	5094440	+	AKR1C3				0.701006		0.813545		0.887324
10	5094444	+	AKR1C3				0.586517		0.632659		0.212121
10	5094445	+	AKR1C3				0.517324		0.686558		0.225806
10	5094449	+	AKR1C3				0.236401		0.141029		0.0722519
10	5094454	+	AKR1C3				0.0509837		0.0923468		0.0550811
10	5094455	+	AKR1C3				0.0222222		0.0660098		0.0142857
10	5094456	+	AKR1C3				0.0383013		0.0586683
10	5094458	+	AKR1C3				0.0677966		0.0925969		0.0333333
10	5094461	+	AKR1C3				0.579027		0.686424		0.746753
10	5094468	+	AKR1C3				0.0243223		0.0308915
10	5094469	+	AKR1C3				0.0172511		0.0270399
10	5094470	+	AKR1C3				0.010989		0.0512917
10	5094474	+	AKR1C3				0.0302732		0.0455726		0.0694444
10	5094475	+	AKR1C3				0.00555556		0.0337687
10	5094476	+	AKR1C3				0.0436865		0.0319543
10	5094479	+	AKR1C3						0.0862069
10	5094485	+	AKR1C3				0.188119		0.32407
10	5094498	+	AKR1C3						0.637931
10	5196897	+	AKR1C4						0.0982143
10	5684861	+	TASOR2	0.73202	0.722301	0.738197	0.782764	0.746751	0.768092	0.565008	0.741259	0.752456
10	5684863	+	TASOR2					0.427184
10	5684865	+	TASOR2	0.716981	0.915254		0.861647	0.867277	0.861386	0.889831	0.927273	0.879518
10	5813380	-	GDI2	0.537729		0.887755	0.456716	0.867036	0.797546	0.944444	0.937941	0.959191
10	5813386	-	GDI2	0.73647			0.591776	0.9125	0.885714	0.97922	0.965893	0.965654
10	5890252	+	FBH1	0.845128	0.966102		0.824074	0.842956		0.791304		0.923077
10	7787969	-	KIN	0.855	0.772152		0.959665	0.916452	0.932432	0.931517	0.923077	0.989474
10	12195807	-	NUDT5	0.774578			0.831413	0.944354		0.964706		0.962902
10	12195811	-	NUDT5	0.794861			0.855308	0.93709	0.917808	0.951625	0.920455	0.965566
10	12196274	+	CDC123	0.211538			0.447398	0.869565	0.745455		0.948454	0.9197
10	13161560	+	MCM10	0.80315	0.798969	0.851064	0.948661	0.886447	0.922809	0.888765	0.936709	0.912258
10	13161582	+	MCM10	0.808824	0.741573	0.848485	0.955539	0.891833	0.918919	0.806066		0.815978
10	13161589	+	MCM10				0.803571	0.7872	0.801802	0.785714		0.849315
10	13161590	+	MCM10	0.919355	0.860656	0.863636	0.944213	0.855272	0.885714	0.875829	0.857143	0.735878
10	14878876	+	SUV39H2		0.78		0.923077	0.869848	0.904762	0.92499	0.932432	0.922871
10	14878877	+	SUV39H2					0.769912		0.701754
10	16817358	-	RSU1	0.733333
10	16817487	-	RSU1	0.582418				0.855513	0.811594	0.941176		0.952381
10	16817490	-	RSU1	0.795699				0.91954
10	17644202	+	STAM	0.54902			0.521905	0.479167	0.641509
10	17644204	+	STAM					0.752577
10	17644207	+	STAM	0.877193	0.783333		0.910448	0.893519
10	18651584	-	NSUN6	0.774194	0.828348	0.912281	0.875362	0.806849	0.889764	0.762979	0.945783	0.920251
10	21292975	-	NEBL						0.777778
10	22003698	-	DNAJC1	0.793103	0.909091		0.962264	0.889401	0.868852	0.944544
10	22316398	+	COMMD3					0.756303
10	22316417	+	COMMD3	0.815315	0.755556	0.875622	0.840963	0.896837	0.911765	0.928401		0.938126
10	22321585	+	BMI1	0.96	0.794118	0.915663	0.981378	0.919792	0.969697	0.956915		0.981159
10	24466520	+	KIAA1217	0.694444			0.940851		0.91716	0.913889	0.866667
10	24466531	+	KIAA1217	0.752056			0.884848		0.89697	0.874553	0.866667
10	24466536	+	KIAA1217	0.691176			0.841584		0.878049	0.755556	0.810345
10	27155229	-	YME1L1	0.791667	0.926471	0.851852	0.966092	0.947781		0.942222
10	27240516	-	ACBD5	0.936975	0.761905		0.90566	0.927273	0.924528	0.918467	0.945946
10	27240563	-	ACBD5						0.712121
10	28677494	+	BAMBI	0.726789			0.894394	0.856115	0.903614	0.86578
10	30434646	+	MAP3K8	0.779661		0.851852	0.885567	0.811475	0.75	0.881629	0.803279
10	32347156	-	EPC1	0.836957	0.770833	0.857143	0.926539	0.908646	0.891192	0.934924	0.898477	0.957624
10	32347158	-	EPC1	0.756459	0.726852	0.758621	0.875112	0.848039	0.858537	0.890826	0.826087	0.926508
10	33334542	-	NRP1					0.674419	0.709784
10	33334569	-	NRP1						0.663677
10	35195131	+	CREM	0.865385		0.786561		0.903509	0.901961
10	35195133	+	CREM	0.734064	0.72	0.742222		0.876712	0.879538	0.888322		0.942857
10	35195848	+	CREM	0.777778				0.906542	0.94
10	35195904	+	CREM	0.709302					0.863636
10	35195924	+	CREM	0.736842
10	42782813	+	BMS1					0.716049
10	44978809	-	DEPP1	0.647214	0.76494		0.773063	0.660045		0.891028	0.894549
10	45972502	+	TIMM23	0.69697		0.740741	0.72549	0.825316	0.716049
10	49539040	-	ERCC6	0.7			0.923077	0.918182
10	50739963	+	ASAH2B					0.798817
10	51699581	-	CSTF2T	0.714286				0.916923				0.930556
10	51699585	-	CSTF2T	0.590909	0.344828	0.638554	0.618182	0.595262	0.539062	0.331748	0.387755	0.332578
10	51699603	-	CSTF2T	0.769215	0.810606	0.943662	0.823529	0.838161	0.869347	0.913006	0.848837	0.927936
10	52314283	+	DKK1	0.539194	0.544186		0.693279		0.745873	0.714349
10	58269162	+	CISD1	0.649524	0.817204	0.909091	0.824575	0.784314	0.880682	0.690536	0.875544	0.731959
10	58269250	+	CISD1	0.802632	0.783133		0.927437	0.911954	0.932781	0.923848	0.880952	0.868852
10	58385436	+	TFAM			0.882353	0.690722	0.930657	0.888889
10	58385441	+	TFAM	0.909091	0.853448	0.898374	0.750845	0.909091	0.89916	0.897366	0.904762	0.929348
10	58385443	+	TFAM			0.754717		0.831325
10	58385469	+	TFAM		0.797962	0.851752	0.835467	0.87551	0.857143	0.928388	0.921435	0.965365
10	60778505	+	CDK1		0.653846			0.830827	0.719298	0.790123	0.790123	0.927664
10	63133309	+	NRBF2	0.773585	0.820896		0.79616	0.787634	0.767857	0.796875
10	63269200	-	JMJD1C		0.566038		0.843836	0.777778	0.892308			0.80198
10	63269224	-	JMJD1C		0.796296		0.946903	0.870968		0.9		0.919192
10	63269243	-	JMJD1C	0.814935	0.726945	0.879032	0.930067	0.889488	0.872951	0.838902	0.816514	0.906366
10	67838032	-	DNAJC12					0.708955
10	67838036	-	DNAJC12					0.608247
10	67838059	-	DNAJC12			0.766667	0.927538	0.890202	0.891304		0.851852
10	67838089	-	DNAJC12					0.675676
10	67838100	-	DNAJC12				0.626667	0.831776	0.763636
10	67838110	-	DNAJC12				0.659341	0.804688	0.817073
10	67838171	-	DNAJC12		0.797101		0.969231	0.918392	0.882353
10	67838179	-	DNAJC12		0.894118		0.794521	0.928723	0.939189
10	67838181	-	DNAJC12		0.901154	0.721311	0.941327	0.919992	0.926667		0.963415
10	68075173	-	HERC4	0.709945					0.882353
10	68075197	-	HERC4	0.650943
10	68075261	-	HERC4	0.643797				0.94	0.927273
10	68106071	+	MYPN	0.52439
10	68332030	+	HNRNPH3	0.802941	0.798915	0.847059	0.936709	0.922918	0.899441	0.942134	0.934783	0.939446
10	68332067	+	HNRNPH3	0.639061	0.759619	0.8138	0.872613	0.778869	0.810002	0.811397	0.852825	0.75964
10	68332922	-	PBLD	0.459041			0.770691	0.480899	0.584416	0.695652	0.6875	0.657147
10	68721215	+	CCAR1	0.77914	0.868209	0.815534	0.918087	0.888597	0.941534	0.901265	0.939647	0.948916
10	68721216	+	CCAR1	0.661017	0.831812	0.767857	0.875	0.812933	0.879699	0.754808	0.865248	0.916929
10	68956182	+	DDX21	0.799001	0.873929	0.895307	0.911677	0.91452	0.933333	0.949711	0.926606	0.958014
10	68956193	+	DDX21	0.791356	0.754717	0.818182	0.909491	0.912156	0.908046		0.8625	0.915254
10	68988799	+	KIFBP	0.777778				0.927989	0.882353
10	69088112	+	SRGN	0.484848		0.662455			0.657277			0.871287
10	69088116	+	SRGN	0.721154		0.712821			0.823928			0.876359
10	69088144	+	SRGN	0.88764		0.867841			0.928118			0.781818
10	69088146	+	SRGN						0.764706
10	69088149	+	SRGN	0.742857		0.761905			0.874808
10	69088158	+	SRGN			0.777778
10	69088165	+	SRGN			0.696078			0.754386
10	69088176	+	SRGN			0.469388			0.276316
10	70170502	-	SAR1A	0.756667	0.78125		0.729329	0.873626	0.762712	0.878377	0.884058	0.929276
10	70170510	-	SAR1A	0.789829	0.919792	0.910714	0.912284	0.961639	0.929825	0.967724	0.969863	0.970903
10	70170525	-	SAR1A	0.752644	0.875912	0.884615	0.896969	0.875289	0.909091	0.918582	0.955882	0.942246
10	70815948	+	SGPL1	0.767442			0.935185	0.90708
10	71773520	-	VSIR	0.730716					0.820225
10	71851277	-	PSAP	0.759116	0.889503	0.854545	0.686796	0.917609	0.872951	0.934486	0.945205	0.941176
10	72216280	-	ASCC1					0.842105	0.775862			0.95082
10	72216281	-	ASCC1					0.687151	0.607143
10	72626068	-	MICU1	0.614035			0.863636	0.909091	0.863636	0.912281		0.971429
10	73168058	-	ECD	0.722222		0.836066		0.764228	0.83871
10	73168062	-	ECD	0.8		0.777778	0.948276	0.906475	0.940299	0.972222		0.981308
10	73247265	-	DNAJC9				0.370787	0.293996	0.326316	0.177778		0.3625
10	73252611	-	MRPS16					0.773585
10	73744386	+	SEC24C					0.756098		0.75		0.793103
10	73744409	+	SEC24C	0.776119			0.954545	0.888158
10	73744413	+	SEC24C	0.795104	0.723684	0.851562	0.928603	0.91028	0.898551	0.94091	0.912	0.957555
10	73744414	+	SEC24C	0.736386		0.77	0.918885	0.864407	0.814815	0.78707	0.850575	0.773913
10	73911132	+	PLAU	0.570919					0.9
10	73911134	+	PLAU	0.476996
10	73998165	+	VCL	0.522549
10	74150776	-	AP3M1		0.910448	0.745098	0.789032	0.889937	0.905172	0.894737	0.886792	0.927083
10	74150794	-	AP3M1	0.873488	0.743902	0.852174	0.88235	0.891392	0.906344	0.821053	0.929577
10	74150799	-	AP3M1	0.725446	0.803922	0.716418	0.821093	0.817215	0.777174	0.782609
10	74826596	+	KAT6B	0.728814				0.903904				0.946429
10	74826600	+	KAT6B	0.775545	0.773913	0.633803	0.906464	0.817273	0.869565	0.874089	0.812755	0.973836
10	75401764	-	ZNF503	0.823396	0.799315		0.831716	0.768804		0.887324	0.887324
10	77637734	-	KCNMA1	0.788889					0.922414
10	78033902	+	RPS24					0.251656
10	79068970	+	ZMIZ1	0.76143			0.666667			0.953846
10	79068999	+	ZMIZ1	0.764706			0.878378		0.88
10	80205570	-	ANXA11	0.649351				0.93617
10	84139558	+	GHITM	0.655172	0.802273	0.789116	0.725074	0.703331	0.79476	0.821395	0.864198	0.877303
10	84139563	+	GHITM	0.75	0.886957	0.884615	0.860431	0.866798	0.86166	0.927076	0.904042	0.844828
10	84139564	+	GHITM			0.877193	0.672727	0.918584	0.82716	0.9375
10	84139575	+	GHITM				0.684932	0.693548
10	84139576	+	GHITM				0.791209	0.725926	0.62	0.696078	0.614458
10	87094882	-	GLUD1	0.766544	0.773585		0.833333	0.871287	0.859813
10	87504900	+	MINPP1	0.812168	0.784314		0.909618	0.927966	0.909091	0.959459
10	87863658	+	PTEN	0.775862				0.846154	0.919355	0.865169	0.84	0.884624
10	88880247	+	STAMBPL1	0.756135				0.909894	0.916501	0.865672	0.928571	0.944857
10	88880253	+	STAMBPL1	0.763222				0.911565	0.914286	0.87234	0.874559	0.906861
10	88880254	+	STAMBPL1	0.773191				0.945455	0.935484			0.846154
10	88880284	+	STAMBPL1	0.571683					0.918699
10	88990549	+	FAS	0.768421			0.93578	0.87234	0.966102
10	88990843	+	FAS	0.790079
10	88990853	+	FAS	0.76552			0.933333	0.902778	0.962121
10	89327999	+	IFIT3	0.798355				0.882927			0.945909
10	89392624	+	IFIT1	0.764974				0.864865			0.748538
10	89414568	+	IFIT5	0.844697	0.799923		0.91822	0.911765	0.92549		0.914248	0.943376
10	89643914	-	PANK1		0.736298	0.817391	0.860858	0.903543		0.939432	0.910982	0.940299
10	89701590	+	KIF20B	0.840179	0.835525	0.721649	0.91832	0.889788	0.862179	0.842547	0.88102	0.907352
10	89701610	+	KIF20B	0.813706	0.757279	0.822496	0.868978	0.877726	0.893436	0.877913	0.886776	0.892978
10	89701625	+	KIF20B					0.776119
10	90872001	+	RPP30					0.751724
10	90921071	-	ANKRD1				0.5
10	90921087	-	ANKRD1	0.347533			0.576996	0.742857	0.755618	0.79037
10	90921090	-	ANKRD1	0.423411			0.693049	0.863014	0.84345	0.847833
10	91633071	-	PPP1R3C	0.786797			0.966576		0.914165	0.916667
10	92291174	+	MARCHF5	0.563636			0.653061	0.810897
10	92574093	-	IDE	0.665956	0.65		0.814815	0.80094	0.825688	0.86429	0.802326	0.826984
10	92689955	+	HHEX	0.740456	0.846154	0.801262	0.885469	0.895349	0.882812	0.879395
10	93379947	-	MYOF	0.79277
10	93482201	-	MYOF	0.584071					0.836842
10	93482205	-	MYOF	0.731707					0.868687
10	93482221	-	MYOF	0.681416					0.859873
10	93482234	-	MYOF	0.82454	0.792524				0.903339	0.927647	0.943326
10	93482283	-	MYOF	0.66183
10	93482294	-	MYOF	0.200403	0.154167				0.19745
10	93482364	-	MYOF	0.737949					0.885
10	93482377	-	MYOF	0.789669					0.971014
10	93482382	-	MYOF	0.8254	0.791045				0.911458
10	93482426	-	MYOF	0.771739					0.850746
10	93482427	-	MYOF	0.718209					0.90535
10	93482433	-	MYOF	0.769737					0.939086
10	93496640	+	CEP55	0.888889	0.78626			0.899441	0.892193	0.848485		0.909091
10	94362892	-	NOC3L				0.868852	0.902965	0.767857	0.852632	0.971831
10	94362936	-	NOC3L	0.776804	0.687281	0.882812	0.85983	0.857979	0.834367	0.840237	0.820652	0.882506
10	94362957	-	NOC3L		0.65			0.778243	0.737705
10	94362965	-	NOC3L	0.758389	0.871429		0.881188	0.892282	0.921053	0.869565		0.875
10	94545789	+	HELLS					0.369295
10	95291035	-	PDLIM1	0.795489			0.891001	0.92	0.901639
10	95693871	-	TCTN3	0.646154			0.914234	0.90301	0.938272	0.93442	0.944444	0.927083
10	95693899	-	TCTN3	0.72549			0.936095	0.911765		0.925061		0.962963
10	96129752	+	ZNF518A				0.766667	0.89313		0.982456
10	96587018	-	TM9SF3	0.859091	0.779221		0.922603	0.893023	0.869565	0.803218	0.944644	0.866667
10	97401328	-	RRP12			0.740741	0.852459	0.717172	0.745763	0.766234		0.7625
10	97401329	-	RRP12			0.756098	0.8125	0.811927	0.851064	0.813725		0.897877
10	97401332	-	RRP12					0.743119	0.741379			0.633333
10	97401334	-	RRP12					0.559322
10	97446182	+	ZDHHC16	0.772277			0.823529	0.782407	0.82716
10	97687224	-	AVPI1	0.602564					0.590164
10	99430655	-	GOT1	0.607942	0.605263	0.722222	0.775974	0.726415	0.789157	0.471429		0.54
10	99732075	-	COX15		0.596491			0.852941
10	99732076	-	COX15		0.7			0.705882				0.681159
10	99782630	+	ABCC2		0.612632		0.819881		0.744329	0.768429
10	99782640	+	ABCC2		0.696906		0.921248		0.871849	0.863062	0.896907
10	99782644	+	ABCC2		0.694545		0.876292		0.848128	0.918735
10	99782646	+	ABCC2		0.769026		0.567889		0.725886	0.865169
10	99782652	+	ABCC2		0.527273		0.175		0.588889
10	99782656	+	ABCC2		0.546617		0.343372		0.762843	0.861538
10	99782664	+	ABCC2		0.337526		0.539555		0.723938	0.575758
10	99782665	+	ABCC2						0.52381
10	99782669	+	ABCC2		0.697674		0.440476		0.802752
10	99782684	+	ABCC2						0.722222
10	99782690	+	ABCC2		0.679522		0.954523		0.917508	0.902831
10	99782694	+	ABCC2		0.572464		0.818182		0.840659	0.90614
10	99782697	+	ABCC2		0.708288		0.908445		0.896552	0.905221
10	99782713	+	ABCC2		0.520833		0.948098		0.789895	0.891743
10	99782725	+	ABCC2		0.6		0.871891		0.783778	0.885925
10	99782745	+	ABCC2				0.805464		0.776471	0.885674
10	99782793	+	ABCC2				0.431877		0.621212
10	99782796	+	ABCC2				0.402778		0.679245
10	99782798	+	ABCC2		0.663366		0.748006		0.770308	0.753247
10	99782799	+	ABCC2				0.782576		0.849558
10	99782802	+	ABCC2		0.793269		0.829338		0.843023	0.893229
10	99782804	+	ABCC2		0.71916		0.842003		0.835052	0.817204
10	99782807	+	ABCC2		0.627557		0.801305		0.761798	0.686869
10	99782813	+	ABCC2		0.763636		0.887385		0.847682	0.590909
10	99782833	+	ABCC2		0.654824		0.800524		0.755725
10	100267632	-	CWF19L1	0.682003	0.757895	0.674699	0.854804	0.897452	0.793503	0.898046	0.704068	0.931277
10	100267679	-	CWF19L1		0.72549			0.809211	0.767857			0.772831
10	100347208	+	SCD		0.78022		0.759615	0.913133	0.881356
10	100347298	+	SCD		0.461538		0.708463	0.636748	0.697368	0.584878
10	100529859	-	NDUFB8	0.775	0.594613		0.911765	0.580537	0.692308	0.47749	0.458333	0.674098
10	101783393	-	NPM3	0.671875	0.845238		0.66674	0.868932
10	101783403	-	NPM3	0.771654	0.521524	0.64	0.877935	0.684294	0.706122	0.452577	0.423611	0.458861
10	101783404	-	NPM3	0.854558	0.761924	0.837963	0.906763	0.872928	0.862069	0.893971	0.840336	0.877805
10	101783407	-	NPM3	0.688576	0.647347	0.745968	0.726336	0.685466	0.706933	0.616342	0.807519	0.808061
10	102114943	-	LDB1	0.752809	0.815476	0.875	0.863591	0.863415	0.866667	0.7818	0.941176	0.8614
10	102152399	+	NOLC1	0.741379	0.794118	0.850746	0.712838	0.89957	0.88764	0.900901	0.892308	0.951467
10	102420831	+	FBXL15		0.746269		0.948157	0.933908		0.944954	0.916667
10	102502662	-	ACTR1A	0.842857				0.709924
10	102502665	-	ACTR1A	0.746479			0.790323	0.850467
10	102504003	+	SUFU	0.785047	0.898305		0.903614	0.892655				0.961538
10	102854285	+	BORCS7-ASMT	0.767123			0.797534	0.953488		0.957746		0.984111
10	103153631	-	NT5C2	0.698925			0.940206		0.946809	0.896924
10	103193258	-	NT5C2	0.799401	0.806885	0.914286	0.926982	0.914	0.932903	0.927071	0.924708	0.907434
10	103396425	-	ATP5MK	0.453299	0.464789	0.583893	0.392369	0.63913	0.51462	0.725222	0.689815	0.636364
10	103396426	-	ATP5MK	0.730859	0.482639	0.837563	0.807023	0.841232	0.731034	0.787232	0.790005	0.602273
10	103396434	-	ATP5MK	0.571235	0.555068	0.686275	0.645702	0.761079	0.649492	0.76065	0.701389	0.809722
10	103396437	-	ATP5MK	0.626669	0.624309	0.684685	0.637688	0.842722	0.697819	0.862424	0.625035	0.771429
10	103396439	-	ATP5MK	0.513027	0.452055	0.3875	0.453125	0.647368	0.486486	0.587302	0.425743	0.349206
10	103396451	-	ATP5MK	0.727167	0.690832	0.72755	0.759511	0.833296	0.830346	0.825386	0.728458	0.708459
10	103396463	-	ATP5MK	0.650954	0.758295	0.706967	0.659397	0.65822	0.670717	0.807504	0.834876	0.824915
10	103396636	+	PDCD11	0.890598	0.722816	0.925	0.984383	0.919908	0.946108	0.9388		0.965789
10	103452365	-	CALHM2	0.719275	0.721154
10	104122132	+	SFR1	0.871556	0.765449		0.903226	0.906498	0.936842	0.921153	0.932692	0.95753
10	104254884	+	GSTO1	0.882576	0.946429		0.772152	0.935673		0.93617		0.95
10	110497867	+	DUSP5	0.670588	0.767442				0.859551	0.923494
10	110497871	+	DUSP5		0.731343				0.807692	0.829268
10	112950228	+	TCF7L2	0.760563	0.782178		0.962963	0.942308				0.967391
10	112950250	+	TCF7L2	0.81469	0.652089		0.91547	0.897196	0.932054	0.891355	0.854912	0.895368
10	112950313	+	TCF7L2		0.706667			0.833333
10	112950345	+	TCF7L2		0.75419		0.918403	0.875635	0.86087
10	112950356	+	TCF7L2		0.66725		0.942826	0.952255	0.944444	0.896331	0.910448
10	112950361	+	TCF7L2	0.742424	0.706355		0.92992	0.874739	0.932099	0.933473	0.922078
10	112950365	+	TCF7L2	0.507246	0.713973		0.795468	0.831461	0.871111	0.924298	0.830769
10	113679169	+	CASP7				0.796875	0.959698
10	113679185	+	CASP7	0.865385	0.791667		0.972603	0.933162	0.951613
10	113854378	-	DCLRE1A	0.873563	0.734513	0.757009	0.907251	0.881316	0.919137	0.932184	0.843599	0.949993
10	113854666	+	NHLRC2	0.836972	0.724354	0.863158	0.90318	0.908876	0.927171	0.877903	0.89629	0.944044
10	114938219	+	TRUB1		0.79661			0.927928
10	114938225	+	TRUB1		0.793812	0.840336	0.934949	0.923262	0.945657	0.927032	0.924652	0.961775
10	114938232	+	TRUB1					0.791667
10	114938233	+	TRUB1	0.72	0.868687		0.892857	0.937086	0.88	0.975866	0.9	0.967315
10	114938248	+	TRUB1	0.769437	0.820776		0.825941	0.899571	0.868852	0.947738	0.87037	0.938138
10	118342301	-	FAM204A	0.797891	0.761905		0.868356	0.877387	0.915385	0.966667		0.951455
10	119178792	-	PRDX3				0.322222			0.674699
10	119596674	-	TIAL1	0.742955	0.638952	0.723958	0.872537	0.76197	0.672566	0.806452	0.80814	0.827778
10	119651414	+	BAG3	0.685374				0.825137	0.902913
10	119651424	+	BAG3	0.649282	0.684211		0.796296	0.838384	0.901515	0.846154
10	119651425	+	BAG3	0.79661	0.833333			0.92	0.904762
10	119651440	+	BAG3	0.696203					0.9375	0.964286
10	119872883	-	MCMBP	0.70507	0.838594		0.710843	0.87013	0.909091	0.892308	0.945455	0.960429
10	123008795	-	IKZF5	0.862745	0.888997	0.72549	0.963855	0.945022	0.985915	0.963299	0.923077	0.97334
10	123154403	+	BUB3		0.81258	0.786885	0.866667	0.879098	0.9	0.894131	0.945	0.936581
10	123154417	+	BUB3					0.576087				0.723684
10	123154420	+	BUB3		0.588785		0.706522	0.589309	0.70922	0.521198	0.665094	0.645635
10	123154421	+	BUB3		0.673913		0.872727	0.801471	0.886792	0.861611	0.852459	0.909503
10	123154424	+	BUB3	0.410256	0.385328	0.521739	0.658333	0.550147	0.539474	0.568609	0.341538	0.478663
10	124801803	+	ABRAXAS2	0.938053	0.835052	0.777778	0.95082	0.910979	0.962963	0.933333		0.948905
10	124801821	+	ABRAXAS2	0.798718	0.852273		0.833333	0.904676	0.902174	0.918182	0.933333	0.984482
10	125160563	-	CTBP2	0.795144	0.813438			0.891344	0.963608		0.841772
10	125823522	+	BCCIP		0.865854					0.781818
10	133373349	-	ECHS1	0.467863	0.510638	0.573333	0.355508	0.434837	0.474286	0.591553	0.684211	0.7
11	208825	+	RIC8A	0.669811				0.816327
11	236993	+	PSMD13	0.640845	0.806818	0.897436	0.742477	0.931232	0.88764	0.923878	0.890244	0.928989
11	308140	+	IFITM2	0.77184			0.797619	0.765517	0.860215
11	450281	+	PTDSS2	0.585714			0.703704
11	507201	-	RNH1	0.79422			0.843137	0.931034	0.892857
11	507238	-	RNH1	0.746032
11	809986	+	RPLP2					0.703125
11	810006	+	RPLP2	0.729944	0.694444		0.411248	0.622951	0.766355		0.728682	0.847059
11	810304	+	RPLP2			0.698925					0.809524
11	842484	-	POLR2L	0.436296				0.915493	0.836879		0.866667
11	842502	-	POLR2L	0.503965	0.666667	0.911504	0.351728	0.926641	0.87123	0.907407	0.902564	0.949159
11	1763906	-	CTSD	0.702128			0.6939	0.91358		0.98861	0.965909
11	2400748	+	TSSC4	0.742268			0.929412	0.884615	0.938462	0.918033		0.963636
11	2992290	-	NAP1L4	0.921348			0.869159	0.922948	0.951613	0.753501		0.802817
11	4094830	+	RRM1	0.695591	0.715596	0.781915	0.815302	0.771762	0.828037	0.84855	0.839623	0.847102
11	4094831	+	RRM1	0.636364	0.6	0.666667	0.784405	0.773625	0.819767	0.792	0.753623	0.827265
11	4094866	+	RRM1	0.5			0.631579	0.586402			0.583333	0.642901
11	5596806	+	TRIM6	0.437912					0.794872
11	5685052	-	TRIM5	0.484257	0.686486	0.688889	0.615583	0.571429	0.665605	0.659	0.859206	0.819277
11	5685070	-	TRIM5	0.583333
11	5685071	-	TRIM5	0.713043				0.827586
11	5685073	-	TRIM5	0.493671
11	5685074	-	TRIM5	0.777733	0.869231	0.861925	0.938673	0.878889	0.937182	0.930622	0.91872	0.959804
11	5689626	+	TRIM22	0.746975
11	5689629	+	TRIM22	0.732143					0.865385
11	5689648	+	TRIM22	0.725786					0.877551			0.945946
11	6320542	-	CAVIN3	0.714383
11	6481501	+	TIMM10B	0.710841	0.729769	0.817518	0.86	0.853398	0.903382	0.898541	0.816327	0.891706
11	6603797	+	ILK	0.862037			0.842105	0.784091		0.87037
11	6603799	+	ILK	0.730154			0.791895	0.778626
11	6683296	-	MRPL17	0.210526			0.283019	0.483333
11	6683307	-	MRPL17	0.819483	0.771733	0.897638	0.891552	0.884205	0.921299	0.901531	0.932466	0.955869
11	6683319	-	MRPL17					0.483871
11	7987373	+	EIF3F	0.677966
11	9265343	-	DENND5A	0.691667			0.885417	0.809886
11	9314630	-	TMEM41B	0.788732	0.892857			0.93007	0.941176
11	9461012	+	ZNF143	0.68544	0.816832		0.901809	0.892624	0.902778	0.901383	0.886364	0.936132
11	10305073	+	ADM	0.479551	0.584321		0.885884	0.805499	0.832277	0.821226	0.800048	0.596774
11	10305077	+	ADM	0.401171	0.53995		0.85661	0.751551	0.772686	0.823714	0.792873
11	10541147	-	RNF141	0.8173	0.648543	0.95	0.943129	0.931579	0.929204	0.95082	0.898734
11	10808578	-	EIF4G2	0.779661				0.903846				0.947853
11	10808893	-	EIF4G2	0.527027			0.241935	0.82716		0.761905
11	10808900	-	EIF4G2					0.448276		0.28
11	10808904	-	EIF4G2	0.602974	0.73913		0.559676	0.81459	0.76699	0.844963	0.625	0.697674
11	10808916	-	EIF4G2	0.714286		0.84	0.730769	0.813333		0.775		0.741379
11	10808961	-	EIF4G2	0.716667				0.872611	0.890909			1
11	10808986	-	EIF4G2					0.763636
11	12674409	+	TEAD1	0.718447	0.835821		0.815789	0.926606	0.95122
11	12674428	+	TEAD1	0.77551				0.909091	0.961538
11	12674430	+	TEAD1	0.794361			0.883929	0.932773	0.908333
11	13668659	+	FAR1	0.750486	0.803279			0.850829	0.857143
11	13668723	+	FAR1					0.719298
11	14499848	-	COPB1	0.667724	0.72		0.850439	0.841826	0.886792	0.819444	0.861111
11	14520344	-	ENSG00000256206	0.724138		0.824561	0.760417	0.938318	0.930435			0.924528
11	14520371	-	PSMA1					0.53125
11	14520401	-	PSMA1	0.362069			0.207792	0.666667
11	16738647	+	C11orf58	0.664992	0.768248	0.805981	0.691169	0.701961	0.845872	0.526367	0.892038	0.845022
11	16738652	+	C11orf58	0.464457	0.5		0.695725	0.574545	0.659794	0.680412	0.485294	0.63124
11	16738678	+	C11orf58	0.793428	0.817429	0.881481	0.929204	0.849558	0.91599	0.907036	0.915942	0.947672
11	17077641	-	RPS13				0.633333	0.846154	0.865672			0.89
11	17077644	-	RPS13	0.915789	0.893939	0.92268	0.761468	0.972106	0.983607	0.942029	0.963303	0.981596
11	17077653	-	RPS13	0.80303			0.493976	0.865724	0.902778		0.833333	0.890537
11	18322604	+	GTF2H1	0.681818		0.820896	0.886364	0.884774	0.852459
11	18394584	+	LDHA	0.65456		0.907407	0.720956	0.905941	0.654545		0.689655	0.825397
11	18394591	+	LDHA	0.775172	0.678161	0.862903	0.777773	0.883375	0.81982	0.869565	0.914912	0.851874
11	19117170	+	ZDHHC13					0.797101				0.871429
11	19240904	-	E2F8		0.715909		0.843137	0.841945		0.88764	0.95	0.893333
11	20364104	+	HTATIP2	0.76	0.814815				0.909091	0.89899	0.895294
11	27472754	-	LGR4				0.912698	0.886525	0.908046	0.780702	0.898305
11	27701542	-	BDNF	0.725792	0.757812				0.818182
11	27701621	-	BDNF	0.701799
11	28108122	-	KIF18A		0.816327			0.914498	0.967742	0.903226	0.785714	0.933129
11	28108127	-	KIF18A		0.779661			0.861538	0.892308	0.857143		0.953704
11	28108133	-	KIF18A		0.842703			0.751656	0.905172	0.879121	0.9	0.867347
11	31509775	+	ELP4		0.774194		0.907407	0.896552		0.831325	0.927711	0.897196
11	32583856	+	EIF3M	0.767857		0.678161	0.678382	0.68144	0.728916	0.74026	0.828125	0.739726
11	32583888	+	EIF3M	0.785714	0.9	0.858824	0.88172	0.886486	0.908654	0.89697	0.897019	0.950219
11	33161468	-	CSTF3					0.701031
11	33161479	-	CSTF3	0.760563	0.881356	0.885246	0.77551	0.9275	0.939394	0.927388		0.956019
11	33736401	-	CD59	0.431691			0.357143		0.410714
11	33736411	-	CD59	0.51486			0.415094		0.517857
11	33736421	-	CD59	0.594156			0.585366	0.709677	0.655172
11	34052317	+	CAPRIN1	0.754717				0.888889				0.909814
11	34105602	+	NAT10	0.821449	0.869565	0.782805	0.944732	0.918335	0.961131	0.920038	0.90535	0.929337
11	34642137	+	EHF						0.835821		0.691358
11	34642382	+	EHF		0.736842				0.858974		0.835106
11	34642389	+	EHF						0.870229		0.731481
11	34916343	-	APIP	0.672269	0.938776		0.969072	0.915114	0.884211
11	34916348	-	APIP	0.708333	0.928571		0.952381	0.923246	0.890411
11	34916618	+	PDHX	0.448509	0.619883		0.76087	0.70963	0.699248	0.601082	0.626087	0.554217
11	34916642	+	PDHX	0.342105			0.535714	0.258824
11	34977787	+	PDHX	0.463768
11	35139124	+	CD44	0.758467					0.90625
11	35139174	+	CD44	0.728668	0.750539				0.911526		0.87259
11	36289380	-	COMMD9	0.619883			0.770444	0.898204	0.926267	0.976471		0.903226
11	36289383	-	COMMD9	0.410714			0.615385	0.9	0.90625
11	36289434	-	COMMD9	0.688525				0.852632
11	36510269	-	TRAF6	0.799242	0.867133	0.828571	0.812047	0.752551	0.798742	0.78806	0.858108	0.901993
11	36594451	+	IFTAP					0.770492
11	36594511	+	IFTAP		0.773585			0.819367	0.804878	0.927277
11	43680747	+	HSD17B12	0.640449			0.765306	0.899654	0.96
11	43880837	+	ALKBH3	0.871805	0.762376	0.821782	0.951103	0.915053	0.911602		0.91358	0.938019
11	46617564	+	ATG13					0.871795		0.78		0.979798
11	46617573	+	ATG13	0.878788			0.860393	0.862464	0.796296	0.9		0.913793
11	46617574	+	ATG13	0.666667			0.794991	0.892857				0.803279
11	46617578	+	ATG13	0.753068	0.865672	0.781818	0.754447	0.832721	0.836601	0.792208	0.8	0.927091
11	46617582	+	ATG13	0.704055			0.657447	0.866005		0.878788		0.923077
11	46846260	-	CKAP5	0.776596			0.870275	0.928747	0.865979
11	47214969	+	DDB2	0.794264	0.792453		0.939123	0.905013	0.956902			0.953312
11	47215080	+	DDB2	0.765625	0.881356		0.905151	0.929688	0.905063			0.973333
11	47248796	-	ACP2	0.786409			0.832418	0.913669		0.96875
11	47426257	-	PSMC3	0.67619	0.95122	0.814815	0.848101	0.811966	0.866667	0.819351	0.909091	0.9039
11	47426437	-	PSMC3	0.77451	0.914634		0.888889	0.941423	0.909091	0.965218	1	0.933333
11	47579086	+	NDUFS3				0.641791	0.692308		0.779661	0.806452	0.960396
11	47579089	+	NDUFS3	0.616667		0.925926	0.697109	0.741176	0.74	0.882353	0.72973	0.895238
11	57322328	-	TNKS1BP1	0.797604					0.94386		0.839416
11	57530709	-	TIMM10	0.715882	0.710526	0.853821	0.768798	0.918635	0.844037	0.943171	0.858491	0.91653
11	57530712	-	TIMM10			0.875969	0.709302	0.895833	0.807339	0.944377	0.909091	0.967249
11	57567637	-	UBE2L6	0.417582			0.764706					0.625
11	57567642	-	UBE2L6	0.763441
11	57712597	+	ENSG00000288534	0.753017	0.758601	0.74912	0.868685	0.85157	0.888234	0.894631	0.854293	0.896055
11	57712607	+	TMX2	0.688431	0.698795	0.720183	0.863885	0.806891	0.874707	0.872238	0.82554	0.857836
11	57712615	+	TMX2	0.537483	0.545455	0.681564	0.627635	0.733711	0.712733	0.711299	0.561983	0.663741
11	57712617	+	TMX2	0.526316	0.622642	0.653846	0.664379	0.562162	0.519231	0.51713	0.483146	0.611308
11	57741468	+	SELENOH	0.490385				0.45614	0.490196	0.487179
11	57741485	+	SELENOH	0.716535				0.82	0.77193	0.837838
11	57761822	+	CTNND1	0.628051			0.792593	0.833333
11	57761938	+	CTNND1	0.725856			0.742574		0.730769
11	57761939	+	CTNND1	0.817828			0.794118		0.75969
11	57761941	+	CTNND1	0.593407					0.48
11	57761956	+	CTNND1	0.710509			0.554455		0.865169
11	59810757	-	MRPL16				0.654545	0.707006		0.672727	0.82
11	60842060	+	CCDC86					0.79661		0.90411		0.96
11	60842107	+	CCDC86				0.850746	0.872093		0.778133		0.571429
11	60906584	-	PRPF19		0.762712		0.315789	0.821782	0.814815	0.897129		0.940171
11	60906591	-	PRPF19	0.798936	0.828767	0.829787	0.930736	0.884017	0.905722	0.891005	0.903614	0.914035
11	60914178	+	TMEM109	0.696429				0.80198
11	60914181	+	TMEM109	0.923504				0.720721	0.8625	0.673267		0.784615
11	61333080	-	DDB1	0.75			0.836208	0.775		0.811024
11	61361869	-	CYB561A3	0.837078	0.821429	0.694915		0.935644	0.946903	0.947917	0.90625	0.92381
11	61362280	-	CYB561A3	0.541667				0.530864	0.7	0.554217	0.454545	0.721393
11	61362387	+	TMEM138			0.788462		0.87013	0.927928	0.926141	0.846154	0.94173
11	61429920	-	CPSF7		0.921875		0.710145	0.888112	0.818182	0.948564	0.941176	0.961301
11	61430120	+	ENSG00000256591	0.781461	0.909091		0.938034	0.914286	0.933333	0.94185	0.958904	0.912281
11	61430144	+	SDHAF2	0.858614	0.688525	0.764151	0.823211	0.845865	0.815603	0.624162	0.541667	0.623998
11	61828303	+	FADS2	0.793325				0.92	0.912	0.94454		0.911513
11	61967592	-	FTH1	0.0373139	0.0674157		0.0440331	0.423729	0.0734148	0.339623
11	62546802	-	AHNAK	0.784209						0.981818
11	62573842	-	EEF1G	0.414286			0.430769	0.673077		0.846154
11	62573845	-	EEF1G	0.778626		0.923077	0.781609	0.926941	0.90566	1
11	62573848	-	EEF1G	0.840112		0.961039	0.794118	0.925081	0.934579	1	0.895522	0.972603
11	62573849	-	EEF1G	0.540984				0.764045
11	62573999	-	EEF1G		0.73913		0.903846	0.875641	0.886076	0.929389	0.949045	0.910977
11	62574010	-	EEF1G	0.787467	0.857143	0.789474	0.968449	0.887842	0.927711	0.918608	0.916335	0.872368
11	62621947	-	B3GAT3	0.611111	0.711538	0.887324		0.881857	0.955224	0.960526		0.961184
11	62646602	-	GANAB	0.590622	0.756525	0.680982	0.547009	0.790123	0.74	0.875684	0.773748	0.91904
11	62646611	-	GANAB	0.479845	0.805195		0.422892	0.849398	0.807692	0.935942	0.8125	0.945513
11	62646612	-	GANAB	0.570713	0.871593	0.818182	0.438984	0.870588	0.890547	0.950464	0.839695	0.946061
11	62653302	-	INTS5	0.811765	0.846591	0.748092	0.911783	0.869969	0.858333	0.919444	0.941176	0.909084
11	62665200	-	C11orf98	0.815217	0.684932	0.76	0.912621	0.947297	0.93956	0.917526	0.949153	0.940476
11	62728473	+	TTC9C	0.655556				0.912568	0.9
11	62728494	+	TTC9C	0.676056			0.835821	0.776224	0.769231
11	62728515	+	TTC9C	0.684013	0.681159	0.830769	0.706331	0.869942	0.834356	0.94958	0.853659	0.95283
11	62728516	+	TTC9C	0.663158				0.855072	0.84127
11	62728523	+	TTC9C	0.72043				0.884615				0.888889
11	62761524	+	POLR2G	0.789474				0.909722	0.903846
11	62761581	+	POLR2G	0.641576	0.819444	0.811966	0.815392	0.889746	0.911877	0.964767	0.891892	0.964209
11	62832091	-	STX5	0.648148			0.886792	0.857143
11	62839570	-	WDR74				0.875129	0.796117	0.854839	0.876289	0.894737	0.928571
11	62856161	+	SLC3A2	0.777778	0.755906	0.793651	0.876996	0.854772	0.930108	0.867515	0.892857	0.891304
11	62880925	+	SLC3A2	0.76			0.923077	0.901099	0.939394	0.956404		0.884615
11	62881692	+	SLC3A2	0.760563	0.778481	0.836066	0.945382	0.798635	0.886598	0.923318	0.884615	0.854497
11	62881738	+	SLC3A2	0.791209	0.833333	0.912281	0.898734	0.943925	0.897727	0.925951	0.898204	0.892857
11	63681566	+	RTN3	0.78481				0.882353	0.835294	0.865385	0.838235	0.915881
11	63681571	+	RTN3	0.74101	0.774194		0.491525	0.856322	0.845361	0.876033	0.833333	0.937075
11	63974616	+	COX8A	0.799583	0.83	0.886667	0.894452	0.926941	0.936073	0.944444	0.891089	0.903429
11	63974634	+	COX8A	0.752941		0.85	0.75	0.925	0.958904
11	63974651	+	COX8A	0.78125	0.835821		0.895522	0.964467	0.951724	0.94	0.918033	0.855556
11	63974668	+	COX8A	0.757249	0.940694	0.921429	0.802754	0.961702	0.9	0.947507	0.884146	0.917748
11	63986482	+	OTUB1	0.563636			0.528302	0.899371	0.943925
11	64226224	-	TRPT1	0.730159			0.9	0.8875		0.887931	0.833333	0.984127
11	64246936	-	PPP1R14B					0.776699
11	64246938	-	PPP1R14B	0.610589	0.784593	0.659483	0.607704	0.592657	0.761788	0.521531	0.850202	0.884581
11	64317508	-	TRMT112	0.548008	0.794811	0.83871	0.723714	0.841986	0.872763	0.928413	0.863636	0.953495
11	64317521	-	TRMT112	0.294643	0.608696		0.264423	0.486842	0.649007
11	64317523	-	TRMT112	0.454235	0.637931	0.760563	0.429434	0.614396	0.728916	0.75	0.709091	0.634615
11	64317526	-	TRMT112	0.747664	0.855	0.923611	0.827757	0.841004	0.889535	0.921388	0.948718	0.954212
11	64317528	-	TRMT112					0.76
11	64318192	+	PRDX5					0.739726
11	64318243	+	PRDX5	0.622951	0.666667			0.709677	0.8	0.754386
11	64318261	+	PRDX5	0.663551	0.81		0.615385	0.847458	0.916667	0.845238	0.956522
11	65040906	+	SAC3D1				0.648649	0.923445	0.833333			0.960784
11	65096173	+	VPS51	0.767123				0.901961	0.843137			0.982759
11	65122152	-	FAU	0.763636				0.868132
11	65122165	-	FAU	0.804688	0.758065	0.824324	0.457298	0.870564	0.842105	0.742424	0.712329	0.843137
11	65122170	-	FAU	0.898094	0.928571	0.920635	0.551748	0.858696	0.897436	0.968755	0.89313	0.980769
11	65122174	-	FAU	0.847933	0.871135	0.945813	0.720779	0.948737	0.905172	0.964186	0.94359	0.987288
11	65122325	+	MRPL49	0.651515	0.700093		0.673913	0.798301	0.718182	0.91129	0.855895	0.910674
11	65122339	+	MRPL49	0.762712	0.879358	0.951613	0.920111	0.903421	0.930851	0.950588	0.957007	0.971296
11	65122343	+	MRPL49	0.786511	0.805465	0.832461	0.884349	0.866667	0.897561	0.968126	0.927588	0.926667
11	65134495	-	SYVN1	0.776842	0.860577	0.76	0.956961	0.879828	0.927536	0.922946	0.940171	0.935534
11	65261932	+	POLA2					0.535714
11	65261983	+	POLA2					0.766667
11	65314868	+	CDC42EP2	0.746532			0.890909	0.888889
11	65570489	+	ZNRD2	0.769231		0.934426	0.866898	0.930788	0.946429	0.928571	0.939394	0.960977
11	65858153	-	CFL1	0.843731	0.867925		0.630769	0.95858	0.917647	0.966292	0.898734	0.971869
11	65858199	-	CFL1	0.717968	0.864407		0.877193	0.843621	0.866667
11	65858200	-	CFL1	0.633333				0.803738
11	65900413	-	FOSL1	0.605263
11	65919034	-	C11orf68	0.754747	0.773196		0.921669	0.892857	0.887154	0.79661		0.864407
11	65919437	+	DRAP1	0.726943	0.757962		0.924051	0.86802	0.931507	0.882716	0.788321	0.88457
11	66002108	-	EIF1AD		0.857345	0.727273	0.848485	0.864307	0.854545	0.92238		0.915743
11	66002117	-	EIF1AD					0.758929
11	66002158	-	EIF1AD	0.775025		0.80663	0.917116	0.879771	0.919732	0.871429	0.9276	0.95294
11	66002237	+	BANF1	0.866667	0.773333	0.919643	0.944954	0.924837	0.967742	0.928205	0.931429	0.984127
11	66002358	+	BANF1	0.76708			0.797297	0.799163	0.830508
11	66002487	+	BANF1	0.782051	0.814815	0.780822	0.933333	0.885602	0.894737			0.878378
11	66002492	+	BANF1	0.553763	0.639735	0.677761	0.629193	0.591243	0.670902	0.652825	0.829202	0.80943
11	66002496	+	BANF1	0.671711	0.62619	0.734884	0.725994	0.800433	0.79709	0.706962	0.711833	0.670354
11	66345056	-	BRMS1	0.666667			0.833333	0.829694	0.880435	0.842697
11	66438821	-	MRPL11	0.825397	0.824074	0.796296	0.969444	0.923706	0.965116	0.932598		0.931387
11	66568578	-	CTSF					0.737288	0.759259
11	66677858	-	RBM4B	0.693069	0.757143		0.807692	0.67	0.839506	0.548899		0.745455
11	67119263	+	KDM2A	0.827838	0.788957	0.789116	0.930644	0.871121	0.932365	0.927008	0.896302	0.949715
11	67119268	+	KDM2A	0.804634			0.773333	0.83908	0.847682	0.713886		0.823529
11	67119276	+	KDM2A	0.701754				0.869565		0.912745		0.932203
11	67240014	+	KDM2A	0.727088	0.75	0.741259	0.891244	0.763441	0.868929	0.825274	0.857923	0.903983
11	67240057	+	KDM2A		0.7		0.953125	0.939759	0.886076	0.917203		0.925061
11	67317825	+	RAD9A					0.76
11	68010305	+	ALDH3B1	0.74
11	68030708	+	NDUFS8	0.857209	0.779528	0.925926	0.928125	0.931587	0.915751	0.922602	0.89899	0.931753
11	68460724	+	PPP6R3	0.754386			0.878788	0.927374	0.93617	0.918182
11	69641081	+	CCND1	0.756579					0.984615
11	69641092	+	CCND1	0.6875
11	69641097	+	CCND1	0.692076
11	69641106	+	CCND1	0.693387	0.734848		0.931624		0.874269	0.948472
11	69641108	+	CCND1	0.535877					0.845238
11	69641122	+	CCND1	0.672985	0.703125		0.852459		0.790123
11	69641158	+	CCND1	0.707584	0.860784		0.85597		0.87907	0.967678
11	69641172	+	CCND1	0.663123			0.802469
11	70203267	+	FADD	0.788112	0.836771	0.829333	0.942263	0.89324	0.922474	0.922782	0.899507	0.946946
11	70203306	+	FADD	0.724074	0.826923		0.938462	0.884298	0.889401	0.931194	0.928898	0.960499
11	71928594	-	XNDC1N	0.730159			0.947667	0.90057	0.942408	0.952941	0.891566	0.957011
11	72080530	-	NUMA1	0.78125	0.894067	0.833333	0.935185	0.933419	0.934579	0.973016	0.935897	0.964519
11	72103276	-	LAMTOR1	0.67101			0.88832	0.899351	0.882353
11	72103286	-	LAMTOR1	0.668831			0.916991	0.869369	0.853659	0.91358		0.884615
11	72103287	-	LAMTOR1	0.770115			0.906667	0.903226
11	72112759	-	ANAPC15					0.607595
11	72112760	-	ANAPC15					0.615385
11	72112761	-	ANAPC15	0.611111				0.780822	0.828571	0.828125		0.866667
11	73876806	-	COA4	0.768293	0.754098	0.883333	0.918333	0.918239	0.873239	0.922115	0.896	0.927484
11	73876823	-	COA4	0.770375	0.836066	0.903226	0.823927	0.926094	0.880952	0.942308	0.867647
11	73876844	-	COA4	0.717508	0.742574	0.758621	0.767829	0.80905	0.848592	0.875	0.808824
11	73982843	-	UCP2	0.77512	0.855536	0.906795	0.94269	0.91499	0.941489	0.950565	0.959247	0.966397
11	74170960	-	C2CD3	0.634921				0.857143
11	74171000	-	C2CD3	0.729167				0.875
11	74171313	+	PPME1	0.788462				0.936364
11	74171322	+	PPME1	0.689529			0.981481		0.981818
11	74171333	+	PPME1	0.663356				0.847222	0.88
11	74171338	+	PPME1	0.650958
11	74171342	+	PPME1	0.481813					0.807692
11	74171361	+	PPME1	0.695491	0.860465	0.859375	0.948279	0.943925	0.931707	0.903226	0.94186
11	74171363	+	PPME1	0.602771
11	74592575	+	POLD3					0.75
11	75399497	+	RPS3	0.850467	0.789474	0.916667	0.881579	0.916493	0.936508	0.926316	0.927273
11	75399545	+	RPS3	0.597229	0.780702	0.853896	0.71776	0.859292	0.871245	0.940572	0.891815	0.951453
11	75399548	+	RPS3			0.683544	0.684211	0.755127	0.728814	0.851481	0.8	0.905215
11	75399553	+	RPS3	0.630769	0.701299	0.811659	0.663576	0.827998	0.785714	0.908853	0.880598	0.89761
11	75562254	+	SERPINH1	0.655394	0.782051		0.864103	0.871795	0.846774	0.834659	0.877778
11	77820717	-	RSF1	0.765625			0.820896	0.841584
11	78079812	-	NDUFC2	0.763889	0.698113	0.924528	0.899072	0.8945	0.894231	0.933156	0.957143
11	78079834	-	NDUFC2	0.799315	0.735849	0.828829	0.897764	0.776471	0.682292	0.878336	0.688679
11	78079835	-	NDUFC2	0.361639	0.1479	0.244681	0.518349	0.272608	0.215054	0.319796	0.148438	0.127907
11	78079838	-	NDUFC2	0.855661	0.829824	0.817875	0.907493	0.853593	0.829084	0.878414	0.811259	0.62196
11	78139589	-	ALG8	0.734375		0.846154	0.922779	0.849123		0.848485		0.917526
11	78139607	-	ALG8	0.862745			0.954453	0.821782	0.814815	0.768421	0.588235	0.810811
11	78139628	-	ALG8	0.269663	0.163934	0.303279	0.132881	0.269693	0.256757	0.306818	0.333333	0.368
11	78574779	-	NARS2		0.898734	0.854545	0.771695	0.881295	0.876404	0.989011		0.927273
11	78574823	-	NARS2				1	0.8125		0.925926		0.754386
11	82900424	-	PRCP	0.897324	0.874214	0.781818	0.959786	0.946738	0.982609	0.944		0.961165
11	83157153	+	PCF11	0.780822	0.733333		0.908788	0.844327	0.920635	0.954128	0.897436	0.906614
11	83157159	+	PCF11	0.817046	0.771543	0.823529	0.893196	0.883128	0.927447	0.895788	0.872259	0.918766
11	83286366	-	CCDC90B				0.747368	0.897297
11	85628595	+	TMEM126B	0.768799	0.847084	0.813198	0.904343	0.892835	0.90477	0.964711	0.896154	0.9643
11	85628605	+	TMEM126B	0.570238	0.826712	0.868263	0.735247	0.882069	0.865061	0.922251	0.751384	0.92572
11	85647988	+	TMEM126A	0.8688	0.774194	0.918478	0.897382	0.944509	0.955026	0.931332	0.904762	0.914901
11	86069860	-	PICALM	0.775			0.872727	0.868852			0.89881
11	86302319	+	HIKESHI	0.727273			0.95027		0.948718			0.942529
11	88337697	-	CTSC	0.589156		0.87931	0.862162			0.953519	0.96672	0.965517
11	88337705	-	CTSC	0.569262	0.836066	0.850144	0.812832	0.913386	0.943925	0.949644	0.940723	0.928704
11	93741688	+	C11orf54				0.626887	0.784		0.568627	0.912281
11	94128858	+	PANX1	0.827206	0.775		0.950183	0.910345		0.971014		0.947368
11	94128868	+	PANX1	0.75641				0.942857
11	94493852	-	MRE11	0.728395	0.7		0.793942	0.737671	0.770588	0.831461	0.913793	0.802597
11	94494004	+	ANKRD49	0.82323	0.822222	0.801527	0.78978	0.831455	0.895397	0.879877	0.915602	0.928559
11	94494010	+	ANKRD49	0.811356	0.795282	0.868817	0.935157	0.871255	0.915051	0.918095	0.948309	0.944777
11	94494011	+	ANKRD49					0.720183				0.888889
11	94973547	-	CWC15	0.710089	0.733333	0.833333	0.856483	0.850179	0.832168	0.791667	0.846289	0.913654
11	94973555	-	CWC15	0.702527	0.829292	0.833333	0.843307	0.854291	0.907407	0.954608	0.957921	0.973993
11	94973560	-	CWC15					0.759494
11	94973571	-	CWC15	0.816323	0.754491	0.793814	0.872254	0.849894	0.870504		0.821381	0.841567
11	95066919	+	SRSF8	0.887755	0.774194	0.817391	0.926461	0.91829	0.93361	0.945455	0.888851	0.939895
11	95790469	+	CEP57				0.578947	0.758621	0.74359			0.806352
11	102317487	+	BIRC3						0.690909			0.938272
11	102347237	+	BIRC2	0.77037	0.817831		0.895039	0.887477	0.878788	0.888275	0.95	0.97256
11	102452692	-	TMEM123				0.773826
11	102530721	-	MMP7						0.212121		0.19802
11	102530727	-	MMP7						0.578231		0.688918
11	102530735	-	MMP7						0.364431		0.461459
11	102530744	-	MMP7						0.646492		0.585908
11	102530796	-	MMP7						0.777778
11	102530804	-	MMP7						0.75		0.6875
11	104968594	-	CASP4	0.832937	0.790123		0.91208		0.955882	0.909641	0.947826
11	106077639	+	AASDHPPT					0.774775
11	107457819	-	CWF19L2	0.894689	0.736839	0.851064	0.943952	0.938418	0.939759	0.929776	0.937304	0.953332
11	108009337	+	CUL5	0.783452	0.818463	0.849315	0.948963	0.871452	0.951807	0.920106	0.933775	0.9581
11	108222606	-	NPAT	0.698113				0.909836				0.893939
11	108222629	-	NPAT	0.789516	0.842308	0.805405	0.944067	0.900805	0.94086	0.946951	0.9375	0.949861
11	108665080	+	DDX10	0.781972	0.823529	0.912281	0.853571	0.931459	0.915094	0.99115	0.961905	1
11	108929487	+	DDX10	0.586667
11	108929510	+	DDX10	0.626667					0.83871
11	108929521	+	DDX10	0.645101					0.87358
11	108929538	+	DDX10	0.6875
11	108929552	+	DDX10	0.497405					0.846154
11	108929561	+	DDX10	0.557306					0.811224
11	108929563	+	DDX10	0.631902					0.903846
11	108929577	+	DDX10	0.632653					0.888889
11	108929582	+	DDX10	0.612613
11	108929583	+	DDX10	0.555556
11	108929584	+	DDX10	0.409091
11	108929586	+	DDX10	0.556859					0.839667
11	108929598	+	DDX10	0.623934					0.813187
11	110296612	-	RDX	0.882298	0.772958	0.852113	0.902746	0.921822	0.892344	0.925036	0.944444	0.957102
11	111911978	-	CRYAB	0.808936			0.778761
11	111937343	+	DIXDC1	0.75			0.961837	0.935115	0.957895	0.950518
11	112074315	+	NKAPD1	0.691121	0.8	0.805556	0.695641	0.816988	0.891892	0.933962	0.761905	0.948877
11	112164044	-	IL18		0.786765					0.890909
11	114296307	+	NNMT	0.608696					0.909091
11	114296347	+	NNMT	0.689774					0.858696
11	114296356	+	NNMT	0.68253					0.830541	0.887097	0.817354
11	114296363	+	NNMT	0.791798					0.908397
11	114296365	+	NNMT	0.788043
11	114296366	+	NNMT	0.666667
11	114296375	+	NNMT	0.506024
11	114296377	+	NNMT	0.708544					0.816754
11	114296388	+	NNMT	0.45844					0.695652
11	114296399	+	NNMT	0.634223					0.821267		0.890799
11	114296414	+	NNMT	0.769425					0.859649
11	114296446	+	NNMT	0.635758					0.767442
11	114296449	+	NNMT	0.650053					0.843319	0.833571	0.827365
11	114296450	+	NNMT	0.710356					0.891624	0.909314	0.926792
11	114296522	+	NNMT	0.694578					0.634921		0.727273
11	114298031	+	NNMT						0.684211
11	114439498	+	REXO2	0.827028	0.711864	0.813559	0.809544	0.820225	0.898876	0.871429	0.916667	0.901639
11	116788014	-	ZPR1	0.806664	0.9	0.772727	0.799345	0.876488	0.873684	0.90123	0.96	0.961391
11	117098423	-	SIK3	0.926606	0.72093	0.912281	0.949153	0.927027	0.947368	0.942766	0.916667	0.943871
11	118566050	-	IFT46					0.776699
11	119018379	-	RPS25	0.692562	0.770642	0.782946	0.951613	0.911504	0.928571	0.92562	0.931973	0.922222
11	119018761	+	TRAPPC4	0.793651			0.830986	0.876777
11	119018787	+	TRAPPC4	0.82858	0.765709	0.890201	0.928106	0.865739	0.90116	0.90653	0.919372	0.939808
11	119018788	+	TRAPPC4	0.73494		0.772727	0.88764	0.832117	0.823529	0.816667	0.894737	0.951625
11	119057142	-	HYOU1	0.766697	0.71806	0.843137	0.936754	0.902145	0.945312	0.940244	0.890566	0.949347
11	119095458	-	H2AX	0.526316	0.641791		0.478723	0.821818	0.862069	0.845098	0.794393	0.881004
11	119095462	-	H2AX	0.770816	0.746696	0.764463	0.748167	0.862407	0.908261	0.886844	0.85474	0.934512
11	119095467	-	H2AX	0.776278	0.681057	0.720952	0.919068	0.835804	0.903779	0.876069	0.857407	0.907792
11	119334529	+	RNF26	0.605008	0.794118	0.731343	0.658574	0.858038	0.814815	0.967619	0.843478	0.961556
11	120236638	+	POU2F3			0.54717		0.529412
11	121292783	+	SC5D	0.7889	0.841436		0.958576	0.934169	0.945783	0.943552	0.949914	0.901961
11	123062133	-	HSPA8	0.770859	0.72729	0.825404	0.917095	0.873586	0.930245	0.908567	0.868063	0.929356
11	123195291	-	CLMP	0.693001
11	124622879	+	TBRG1	0.771739	0.867925		0.898305	0.94		0.927273		0.980583
11	125592876	+	STT3A	0.69867	0.782609		0.878181	0.816176	0.841584	0.863636
11	125592883	+	STT3A	0.577033	0.670588	0.666667	0.644026	0.666102	0.554745	0.756851	0.817391
11	125592887	+	STT3A	0.78481			0.880896	0.75		0.682927	0.459016
11	125592907	+	STT3A	0.619718			0.773953	0.915663		0.761905	0.78481
11	126268843	-	SRPRA	0.833333			0.78481
11	126268901	-	SRPRA	0.820919	0.837016	0.793478	0.941768	0.91829	0.919355	0.9591	0.950311	0.943918
11	134223956	-	NCAPD3		0.747253		0.892857	0.881188	0.912281	0.923077	0.890756	0.920028
11	134223965	-	NCAPD3		0.74026	0.676056	0.64	0.741538	0.704225	0.824176	0.826816	0.833436
11	134253348	-	THYN1				0.694915	0.918033
12	401611	+	CCDC77					0.701149		0.676471
12	949647	-	RAD52					0.797101
12	2794996	+	FKBP4	0.786667	0.864497	0.912621	0.921433	0.852248	0.878788	0.921761	0.96793	0.938136
12	2812648	+	ITFG2					0.86087				0.788462
12	4538469	-	C12orf4	0.793744			0.860215	0.905973	0.898438	0.896131		0.945696
12	4538486	-	C12orf4	0.759036				0.910769	0.973333	0.91954		0.921053
12	4538499	-	C12orf4	0.590909				0.839506
12	4538874	+	RAD51AP1					0.892807		0.785714		0.894737
12	4538899	+	RAD51AP1			0.795455	0.8	0.833903	0.808219	0.913165	0.85438	0.893434
12	4538916	+	RAD51AP1	0.760417	0.784314	0.794118	0.867911	0.916139	0.912821	0.908794	0.926686	0.967158
12	4538918	+	RAD51AP1					0.773256
12	4538923	+	RAD51AP1				0.515152	0.511194		0.89899
12	4649123	+	NDUFA9	0.758859	0.616279	0.685484	0.81304	0.731214	0.737288	0.594715	0.585859	0.575
12	4649127	+	NDUFA9	0.650095	0.411765	0.660714	0.739432	0.756962	0.746479	0.766151	0.677778	0.841136
12	4649141	+	NDUFA9	0.791997	0.754902	0.869231	0.779956	0.927107	0.945597	0.931722	0.941176	0.943425
12	4649143	+	NDUFA9	0.483889		0.6	0.302404	0.753535	0.738095	0.800395	0.589286	0.75744
12	6342024	-	TNFRSF1A	0.645724			0.732394		0.777778
12	6342036	-	TNFRSF1A	0.82972	0.76378	0.830769	0.91416	0.917857	0.880093	0.889801	0.881857	0.911392
12	6342062	-	TNFRSF1A	0.401302			0.251792		0.685039			0.897436
12	6342084	-	TNFRSF1A	0.704592	0.758333		0.704296	0.88961	0.828669	0.911822		0.895496
12	6342086	-	TNFRSF1A	0.661972					0.778761	0.982759		0.853211
12	6493221	-	MRPL51	0.67428	0.833333	0.796875	0.530303	0.882682	0.869565	0.946098	0.878788	0.943973
12	6493241	-	MRPL51	0.309524			0.297305	0.563107	0.572917	0.75		0.731481
12	6493247	-	MRPL51	0.434783	0.577778		0.612937	0.528121	0.617886	0.634455		0.706204
12	6493248	-	MRPL51	0.694139	0.673477	0.745455	0.88394	0.795294	0.854378	0.867726	0.802615	0.866219
12	6493279	-	MRPL51	0.64741	0.839286		0.890244	0.821429	0.848739	0.924731
12	6494001	+	NCAPD2	0.507937	0.619048		0.71201	0.618497	0.646667	0.688752	0.722222
12	6534493	+	GAPDH	0.719457	0.793103		0.575919	0.868453	0.878788	0.957228		0.95082
12	6534540	+	GAPDH	0.445186	0.833333		0.411905	0.928044	0.685484			0.868852
12	6534817	+	GAPDH	0.736111			0.875	0.953833	0.886667	0.935245	0.937063	0.951825
12	6568273	-	NOP2					0.736842
12	6663142	-	ING4					0.712121		0.9		0.836735
12	6753120	-	MLF2					0.522222
12	6943928	+	C12orf57						0.74359			0.734888
12	6943934	+	C12orf57		0.756098			0.852632	0.906542			0.881419
12	6944035	+	C12orf57	0.864341	0.78		0.910851	0.903061	0.931838	0.8972	0.917808	0.865002
12	6944048	+	C12orf57	0.840146	0.730873	0.838235	0.922363	0.906961	0.910105	0.909505	0.873563	0.91341
12	6944086	+	C12orf57	0.448939	0.587692	0.83871	0.453035	0.885466	0.737307	0.924631	0.900798	0.910114
12	6970650	-	PHB2	0.857937	0.878889	0.795455	0.948732	0.930945	0.955947	0.946597	0.940741	0.926424
12	6970691	-	PHB2	0.523585	0.516484		0.619048	0.510903	0.528846	0.513158
12	6970699	-	PHB2	0.790639	0.782609		0.95	0.889881	0.955414
12	6970831	+	EMG1	0.786325	0.730676	0.915493	0.93765	0.873737	0.913462	0.927984	0.916099	0.931034
12	6970921	+	ENSG00000290146	0.715152	0.84127	0.833333	0.888108	0.897196	0.924623	0.846705	0.871429	0.869908
12	7936183	-	SLC2A3	0.642276		0.657895	0.668901
12	7936185	-	SLC2A3	0.761919		0.819383	0.807409	0.796954	0.868085			0.927795
12	7936187	-	SLC2A3	0.790751	0.845471	0.805848	0.843647	0.834983	0.899702	0.939811		0.954764
12	8082286	+	NECAP1	0.72008	0.747573	0.820513	0.851336	0.820896	0.836066	0.926628	0.904412	0.945411
12	9869360	-	CLEC2B	0.718427								0.91511
12	9869367	-	CLEC2B	0.741333								0.943963
12	9869377	-	CLEC2B	0.595455								0.947368
12	9869383	-	CLEC2B	0.733855								0.910719
12	9869398	-	CLEC2B	0.755007		0.76						0.907829
12	9869412	-	CLEC2B	0.673913								0.934029
12	10613536	-	MAGOHB	0.0935936	0.08	0.207792	0.221023	0.408277	0.207843	0.361702	0.192	0.330167
12	10723354	-	YBX3	0.792793	0.844828	0.806452	0.806818	0.796943	0.883562	0.857143		0.94179
12	11649674	+	ETV6	0.750088	0.802326		0.938187	0.912773	0.946727	0.952381	0.905821	0.879406
12	11649679	+	ETV6	0.472727	0.828947			0.787611	0.712329		0.807692	0.814275
12	11649688	+	ETV6	0.77	0.777778			0.894273	0.951456	0.95	0.893939	0.922476
12	12813363	+	DDX47	0.588301	0.778947		0.615278	0.886587	0.858974	0.962264		0.97
12	12891565	+	GPRC5A	0.73182	0.765572		0.864865	0.829932	0.888274		0.875497
12	12891567	+	GPRC5A	0.615502	0.698113				0.831933
12	13000235	-	HEBP1	0.789509
12	14385057	+	ATF7IP		0.627451		0.888571	0.85906		0.865968		0.941496
12	14385277	+	ATF7IP	0.632911		0.736842	0.952941	0.885246		0.855338
12	14385281	+	ATF7IP	0.805195	0.921569	0.75	0.89899	0.911392		0.907129		0.924003
12	14771129	-	H4C16	0.797619	0.766166		0.869656	0.840833	0.850481	0.87174	0.833677	0.902586
12	14771131	-	H4C16	0.784427	0.693114		0.899001	0.892386	0.874851	0.861104	0.892328	0.885815
12	14803676	+	C12orf60		0.779221			0.791878		0.813953
12	15882394	+	STRAP	0.794922	0.887441	0.930283	0.818442	0.928959	0.947768	0.972678	0.947602	0.977979
12	15882458	+	STRAP	0.376887		0.84127	0.676616	0.908257	0.846939	0.940756	0.932683	0.868852
12	15882465	+	STRAP	0.628008	0.76699	0.928571	0.790539	0.919711	0.951493	0.965221	0.954216	0.884762
12	16347643	+	MGST1	0.779546	0.888836		0.937176	0.905063	0.925832	0.931723	0.970045
12	16347677	+	MGST1	0.757821	0.889888		0.945044	0.924138	0.928254	0.931825	0.953488
12	16354250	+	MGST1	0.0555556					0.0545455	0.0140845
12	16354251	+	MGST1						0.0228571	0	0.057971
12	16354252	+	MGST1						0.0318471	0.0545455	0
12	16354312	+	MGST1						0.00990099
12	16354315	+	MGST1	0.01			0.0178571		0
12	16354316	+	MGST1						0.0425532
12	16354327	+	MGST1	0			0		0	0.0106383
12	16354329	+	MGST1						0
12	16354330	+	MGST1						0.0375
12	21501594	-	RECQL	0.78114			0.693182	0.801902	0.871212	0.858586	0.878788	0.820513
12	21501793	+	GOLT1B	0.678571	0.566667		0.730769	0.697115	0.673469	0.426829
12	21657768	-	LDHB	0.676471	0.780488			0.941752	0.89433		0.911111	0.949553
12	21657778	-	LDHB	0.681818	0.807692			0.92418	0.895455
12	21657780	-	LDHB	0.659341	0.732558			0.918527	0.864078			0.898551
12	21657789	-	LDHB	0.454225	0.72619	0.813559		0.906193	0.886152		0.851351	0.913605
12	21657820	-	LDHB	0.80773	0.755245			0.769464	0.787234		0.623853	0.762784
12	26938481	+	FGFR1OP2	0.722222			0.878788	0.884615
12	27022580	+	MED21	0.671875				0.759259				0.808397
12	27524174	+	PPFIBP1	0.904278	0.79968		0.950946	0.927215	0.962963	0.945969	0.953271	0.969231
12	29381172	-	ERGIC2	0.680851				0.901734	0.862745
12	32534295	+	FGD4	0.740823			0.898551		0.866667	0.927757
12	32534324	+	FGD4	0.768056			0.868506		0.9	0.913468
12	39443120	-	KIF21A		0.908077	0.764706	0.983041	0.924198	0.97037	0.93647	0.943925
12	42326064	-	ZCRB1	0.26087			0.414113	0.805405		0.945946
12	43758755	-	PUS7L	0.785523	0.8358	0.846939	0.891545	0.924989	0.913462	0.957538	0.901611	0.959152
12	43758767	-	PUS7L	0.84568	0.831034	0.679612	0.901302	0.888393	0.947917	0.923371	0.944681	0.969949
12	43758773	-	PUS7L	0.779661			0.933333	0.900929	0.931034	0.98	0.932773
12	46269043	-	SLC38A1	0.71875			0.968254	0.883139	0.90411	0.727273	0.814815	0.911392
12	46269061	-	SLC38A1	0.75	0.841463		0.927064	0.868979	0.922222	0.917679	0.923913	0.914545
12	46372771	-	SLC38A2	0.562286	0.7		0.730199	0.895973	0.88764	0.874203		0.846154
12	46372773	-	SLC38A2	0.5306	0.657059	0.706522	0.733879	0.835386	0.878049	0.875674	0.874525	0.899066
12	47079957	-	AMIGO2						0.776316
12	47706021	-	RPAP3	0.71831	0.75		0.914286	0.887661	0.859813	0.885809		0.880952
12	47963626	+	TMEM106C	0.746479	0.77381		0.923418	0.824302	0.789474	0.921366	0.927632	0.883216
12	47963628	+	TMEM106C					0.699454		0.614286		0.712121
12	48716753	-	CCNT1	0.776119	0.783784			0.930636		0.958333	0.962264	0.946429
12	48852140	-	DDX23				0.631579	0.741176	0.893939
12	48865870	-	RND1		0.745283		0.868304	0.832653	0.847934	0.854871	0.863014	0.823861
12	48957477	-	ARF3	0.795163	0.8		0.914286	0.894389	0.869159	0.857692	0.818182	0.942308
12	49018759	-	PRKAG1	0.7				0.91369
12	49131383	-	TUBA1B	0.00652328	0.00909091	0.0833333	0.00652303	0.0651629	0.0186335	0.145455		0.0519481
12	49131387	-	TUBA1B	0.123679	0.386831	0.648746	0.0889701	0.72276	0.419231	0.786095	0.633189	0.791254
12	49189008	-	TUBA1A	0.476311				0.944915	0.888889			0.972955
12	49189033	-	TUBA1A	0.0655472				0.396226
12	49189040	-	TUBA1A	0.152941
12	49189041	-	TUBA1A	0.50512				0.908587	0.82243			0.745614
12	49189066	-	TUBA1A	0.53525				0.943515				0.804878
12	49189068	-	TUBA1A	0.60025				0.929412	0.804878			0.953637
12	49265085	+	TUBA1C	0.117838	0.361538	0.299191	0.0902395	0.669027	0.617515	0.863069	0.441918	0.886785
12	49265108	+	TUBA1C	0.527778		0.672131	0.490909	0.757576	0.739496	0.712121	0.796875
12	49265116	+	TUBA1C	0.666667		0.754098	0.676923	0.739583	0.871287	0.864407
12	49348044	+	DNAJC22				0.912736		0.764706	0.936459	0.891667
12	49752469	+	TMBIM6		0.0384615			0.0361446	0.00934579	0.0128133	0.0217391	0.0219175
12	49752500	+	TMBIM6	0.00446429			0.0169492	0	0	0
12	50025430	-	RACGAP1		0.818182		0.892857	0.850077	0.909091	0.873504	0.763636	0.808149
12	50222611	-	LIMA1	0.595978	0.631579			0.792683		0.903287
12	50222634	-	LIMA1	0.781704	0.766667			0.870647		0.913251		0.944444
12	50249935	-	LIMA1				0.776471			0.753425
12	50400913	+	LARP4	0.910714	0.785714		0.919016	0.910714	0.94382	0.902098		0.941748
12	50504990	+	DIP2B	0.88	0.793478		0.932039	0.91866	0.950355	0.914778		0.965986
12	50764078	+	ATF1	0.817219	0.77686	0.840426	0.927101	0.903297	0.909747
12	50764101	+	ATF1	0.809093	0.794151	0.826667	0.926294	0.886125	0.917873	0.896429	0.908665	0.956031
12	50764104	+	ATF1	0.783319			0.943925	0.894309		0.943662
12	51026361	-	SLC11A2	0.798305			0.899749	0.776596	0.86	0.916651		0.813333
12	51173116	-	TFCP2					0.480769				0.91625
12	51238822	+	DAZAP2		0.78			0.914573		0.946903		0.944954
12	51238860	+	DAZAP2					0.517647
12	51239295	+	DAZAP2	0.788235	0.92		0.936709	0.905229		0.93913		0.97619
12	52051442	+	NR4A1	0.640625			0.959459		0.803922
12	52233243	+	KRT7	0.654545					0.91085
12	52233247	+	KRT7						0.527407
12	52233274	+	KRT7						0.558333
12	52905053	-	KRT8		0.0857143		0.0468617		0.138107
12	52905054	-	KRT8		0.647107	0.761905	0.609714	0.756757	0.77616	0.850227	0.598219
12	52905076	-	KRT8		0.777763	0.91956	0.965846	0.950769	0.953237	0.939063	0.873206
12	52949124	+	KRT18	0.620804	0.644194		0.72424	0.939394	0.843742	0.888042	0.85355
12	52949136	+	KRT18	0.0206186	0.105263		0.0375197		0.140704		0.170213
12	53180724	+	ZNF740	0.777778			0.880405	0.917808
12	53232188	-	RARG	0.877551	0.789474			0.968254	0.956044		0.909534
12	53268297	+	ESPL1		0.596491	0.764706	0.824324	0.810478	0.849057	0.693069		0.775821
12	53295565	+	PFDN5	0.618143	0.735099	0.864706	0.57438	0.825879	0.732759	0.954709	0.840909	0.920027
12	53295568	+	PFDN5	0.705016	0.825	0.859649	0.776182	0.856703	0.838384	0.928531	0.875817	0.917266
12	53295580	+	PFDN5	0.7445	0.786667	0.91018	0.460784	0.899281	0.851562	0.912415	0.847458	0.932127
12	53441647	+	PRR13	0.840278	0.777792	0.858921	0.94898	0.911111	0.938714	0.954175	0.957377	0.964897
12	53985093	+	HOXC10		0.786352			0.851266	0.86087	0.930817		0.963618
12	54000102	+	HOXC9	0.811321	0.653233	0.737374	0.851351	0.827815	0.887681	0.868787
12	54000130	+	HOXC9					0.751082
12	54280134	-	CBX5	0.865672			0.929825	0.79538	0.867647	0.686567
12	54280707	+	HNRNPA1	0.840646	0.798485	0.894231	0.929209	0.881858	0.867925	0.868066	0.900552	0.897496
12	54280714	+	HNRNPA1					0.7875
12	54280728	+	HNRNPA1				0.366667	0.819277	0.8	0.740741
12	54280730	+	HNRNPA1	0.847401	0.792593	0.929032	0.913175	0.919367	0.933859	0.879751		0.943723
12	54325150	+	COPZ1	0.791926	0.924116	0.971429	0.820027	0.959328	0.937908	0.984026	0.943262	0.983083
12	54325161	+	COPZ1	0.684813			0.581081	0.933232	0.84507	0.80597		0.9
12	55728324	-	CD63	0.0819672	0.0441176	0.0181818		0.056338	0.027933	0.0201182	0
12	55728980	-	CD63	0.854286			0.90207	0.834025	0.761905	0.77	0.545455
12	55817707	-	SARNP	0.822619	0.742857	0.923077	0.726415	0.888889	0.878049	0.941712	0.891892	0.959589
12	55817713	-	SARNP	0.8326	0.792308		0.840501	0.769153	0.754491	0.811017	0.842593	0.811421
12	55818032	+	ORMDL2	0.839667			0.807692	0.833333	0.836364	0.745098
12	55818053	+	ORMDL2	0.797297			0.943396	0.924138	0.972973
12	55966830	+	CDK2	0.792233	0.768108	0.750806	0.885228	0.83736	0.870984	0.87945	0.859662	0.927
12	55966847	+	CDK2	0.772009	0.679245	0.829268	0.789615	0.887029	0.830508	0.884298	0.929336	0.930527
12	55974067	+	RAB5B	0.714286				0.881988	0.932203
12	56041908	+	RPS26	0.836277	0.772461	0.86409	0.929233	0.905063	0.9576	0.942217	0.940275	0.972411
12	56041910	+	RPS26	0.716049		0.860104	0.590174	0.83542	0.849315	0.938629	0.807301	0.978723
12	56041912	+	RPS26	0.76		0.864198	0.756757	0.911877	0.909091		0.877193
12	56041956	+	RPS26				0.761905	0.863727		0.904163	0.847826	0.97619
12	56116590	+	RPL41	0.793651	0.844828	0.804348	0.943396	0.928517	0.959016	0.954545
12	56116605	+	RPL41	0.713859		0.879433	0.621951	0.886256	0.911392	0.945946	0.823529
12	56116650	+	RPL41	0.825092	0.771599	0.893993	0.877396	0.931247	0.934504	0.941671	0.881431	0.924695
12	56116699	+	RPL41	0.25	0.737928	0.537415	0.345365	0.619973	0.643076	0.856437	0.725197	0.848718
12	56116704	+	RPL41	0.703028	0.847859	0.865823	0.776736	0.85662	0.858132	0.943182	0.892023	0.950613
12	56116706	+	RPL41		0.916667	0.935897	0.552632	0.908349	0.848375	0.915937	0.935323	0.975904
12	56116723	+	RPL41	0.745455	0.811791	0.855856	0.919528	0.897231	0.937839	0.942643	0.930602	0.936351
12	56116736	+	RPL41					0.754325
12	56116741	+	RPL41	0.0535714			0.0104167	0.0768025	0.0127389
12	56158370	+	MYL6	0.810541	0.876884	0.810302	0.838264	0.811557	0.885277	0.734917	0.92497	0.868666
12	56158374	+	MYL6	0.548223	0.605585	0.648649	0.518551	0.727679	0.709199	0.65098	0.561808	0.680187
12	56158376	+	MYL6	0.371276	0.323712	0.210526	0.41559	0.313043	0.200658	0.163815	0.218211	0.325697
12	56158392	+	MYL6	0.698177			0.62	0.598291	0.630137	0.67		0.769231
12	56300337	-	CS	0.775763		0.848485	0.916197	0.945946	0.986842	0.9072	0.981132	1
12	56468582	+	SPRYD4	0.254237			0.671192	0.541237	0.692308	0.75	0.565217	0.706897
12	56522012	+	RBMS2	0.77025					0.923077
12	56522015	+	RBMS2	0.46268
12	56522039	+	RBMS2	0.746269
12	56630308	-	BAZ2A	0.752212	0.716981		0.917647	0.927374				0.934426
12	56636353	-	BAZ2A	0.561146		0.72549	0.833333	0.765766	0.747368	0.815685		0.860465
12	56636371	-	BAZ2A	0.861716	0.779412	0.876404	0.943396	0.943005	0.917808	0.922078	0.941176	0.979592
12	56645963	-	ATP5F1B	0.731183		0.765625	0.816514	0.837004	0.893617	0.921634		0.916619
12	56645977	-	ATP5F1B	0.572902			0.496835	0.881503	0.730769	0.857143		0.950617
12	56688028	-	PTGES3					0.714286	0.859375	0.823529		0.84507
12	56688161	-	PTGES3				0.769231	0.707692	0.763636	0.853463	0.811881	0.856
12	56688257	-	PTGES3	0.830032	0.77733	0.88253	0.933071	0.889536	0.93262	0.930534	0.898917	0.950231
12	56688278	-	PTGES3	0.765612	0.804124	0.841584	0.804348	0.951557	0.904348	0.87223		0.945665
12	56725259	-	NACA	0.766667			0.813692	0.876543	0.969697	0.984615		0.978726
12	56725260	-	NACA	0.738854	0.7625	0.787709	0.86853	0.876342	0.934705	0.901817	0.899306	0.948543
12	56725263	-	NACA	0.774064	0.835165	0.912088	0.834843	0.912587	0.926471	0.953634	0.928571	0.980117
12	56725265	-	NACA	0.774064	0.803681	0.841584	0.876153	0.858365	0.884058	0.865572	0.919786	0.929704
12	56725325	-	NACA					0.758621
12	56752320	-	PRIM1	0.769231	0.819672	0.902439	0.930699	0.926129	0.913793			0.953125
12	57230131	+	SHMT2	0.776125			0.898148	0.88		0.929577
12	57488089	+	MARS1	0.784615			0.849315	0.896641	0.852941	0.865979		0.66129
12	57488090	+	MARS1					0.759259
12	57488094	+	MARS1					0.818519	0.692308	0.881119		0.918605
12	57488096	+	MARS1	0.778846			0.829787	0.914008	0.915493	0.9319		0.869631
12	57520503	-	DDIT3			0.791045		0.803191		0.812623	0.7	0.769231
12	57520507	-	DDIT3					0.797297		0.896		0.844828
12	57520509	-	DDIT3					0.647059		0.777778
12	57520511	-	DDIT3	0.759123	0.734812	0.836773	0.873597	0.838283	0.884276	0.852713	0.920786	0.905794
12	57694148	+	OS9	0.914052	0.882353		0.887321	0.860308	0.933333	0.785097	0.881356	0.738824
12	57694154	+	OS9	0.891302	0.706522	0.844828	0.889607	0.738854	0.72807	0.452404	0.6	0.358828
12	57694155	+	OS9	0.789121			0.713757	0.795276	0.744186	0.683168		0.616667
12	57694158	+	OS9	0.897619	0.703704		0.938825	0.79476	0.835616	0.803755
12	63779857	+	RXYLT1	0.65625			0.90566	0.887218	0.9625	0.881356
12	64759382	-	GNS	0.842941			0.955908	0.791045	0.90099	0.906557
12	64759417	-	GNS	0.538166	0.564935		0.524676	0.541475	0.60452	0.39604
12	65169583	+	LEMD3	0.760417	0.75	0.824561	0.942536	0.894434		0.890625	0.902778	0.940476
12	66130752	-	LLPH	0.57377				0.705882	0.76087	0.869565		0.8
12	66130753	-	LLPH	0.778689	0.764368	0.833703	0.917857	0.896139	0.93602	0.882474	0.952547	0.97725
12	66130765	-	LLPH	0.761905	0.892308	0.933333		0.939535	0.892045	0.938272		0.915278
12	68687004	+	NUP107	0.821429	0.615385		0.910714	0.81137	0.77665	0.554607	0.592593	0.460784
12	68687009	+	NUP107	0.669811	0.831683	0.907104	0.742089	0.921835	0.940299	0.955081	0.916667	0.937601
12	68687010	+	NUP107			0.843137	0.619048	0.898936	0.742424			0.864865
12	68687023	+	NUP107	0.805556	0.815385	0.801887	0.763684	0.929779	0.825806	0.922826		0.82716
12	68687034	+	NUP107	0.74		0.898876	0.831325	0.900609	0.892857	0.913781	0.898551	0.910937
12	68808933	+	MDM2	0.7968	0.807692		0.937399	0.917763	0.919355	0.912133
12	68808937	+	MDM2	0.71875			0.843206	0.848485	0.87931
12	68809024	+	MDM2	0.556871	0.655238		0.712873	0.712187	0.808818
12	68809066	+	MDM2				0.421053	0.827869	0.872727
12	69470420	+	FRS2	0.799574	0.888889		0.919189	0.910626	0.907407	0.932798	0.909091	0.933333
12	69585492	+	CCT2	0.709149		0.905172	0.809804	0.91474	0.84466	0.911863	0.889764	0.892647
12	71664396	+	THAP2					0.79646
12	71686542	+	TMEM19	0.911957		0.784091	0.953922	0.91689	0.956811	0.954335	0.918033
12	71754895	+	RAB21	0.648957			0.741573	0.78	0.703704	0.518519
12	75480765	+	GLIPR1	0.7566			0.888777		0.931579
12	75480789	+	GLIPR1	0.799206			0.854369		0.92
12	75480814	+	GLIPR1	0.619926
12	75480859	+	GLIPR1	0.438596
12	75480890	+	GLIPR1	0.352941
12	75511610	-	KRR1	0.842893	0.789597	0.893443	0.952319	0.929295	0.93634	0.94695	0.944444	0.966267
12	75511627	-	KRR1	0.654437	0.697531		0.811555	0.879499	0.892857	0.922078	0.875	0.882145
12	75511635	-	KRR1	0.875	0.786127		0.939759	0.949117	0.965986	0.981818		0.978563
12	75511673	-	KRR1		0.712963		0.88	0.867021	0.923077
12	76031588	-	PHLDA1	0.6375	0.582		0.86122
12	76031598	-	PHLDA1	0.53274	0.326181		0.722284		0.684211	0.722301	0.771186
12	76084579	-	NAP1L1	0.670487		0.872093		0.938144	0.916667	0.935484	0.92	0.923077
12	76084714	-	NAP1L1				0.731343	0.792969	0.73913	0.722222
12	76348353	-	BBS10		0.533333			0.846154
12	76559802	-	OSBPL8	0.781818				0.896104				0.961538
12	76559808	-	OSBPL8	0.81986	0.784965	0.766234	0.960697	0.92	0.930636	0.943195	0.925373	0.966809
12	76764254	+	ZDHHC17	0.919334	0.780981	0.935252	0.986425	0.954688	0.952174	0.969901	0.881579	0.971861
12	77940168	+	NAV3	0.723962					0.916667
12	77940288	+	NAV3	0.773548					0.964286
12	77940293	+	NAV3	0.680564					0.911765
12	77940317	+	NAV3	0.680085
12	77940323	+	NAV3	0.787879
12	77940325	+	NAV3	0.663462
12	77940341	+	NAV3	0.747956					0.942857
12	77940362	+	NAV3	0.678571
12	77940380	+	NAV3	0.594203					0.882353
12	79690535	-	PAWR	0.69714			0.868918	0.900498	0.923077
12	79690562	-	PAWR	0.68			0.830189	0.878453	0.875
12	82358377	-	CCDC59	0.784416	0.790123	0.8	0.885057	0.851013	0.902778	0.883069	0.850575	0.887755
12	88035540	+	RLIG1					0.795181
12	88142377	+	TMTC3	0.625			0.8	0.917431	0.826667		0.92
12	89352497	-	DUSP6	0.696309	0.582721		0.837843		0.946809	0.853564	0.851727
12	91111473	-	LUM	0.648791						0.932038
12	93441901	-	UBE2N	0.774648			0.927835	0.946508	0.940299
12	93467519	+	MRPL42			0.730769	0.618557	0.802419		0.82177	0.777778	0.914885
12	93569848	+	SOCS2	0.6		0.673759	0.772727	0.828829	0.888889
12	95003680	-	NDUFA12					0.568627
12	95003682	-	NDUFA12					0.629032				0.903226
12	95003687	-	NDUFA12	0.810275	0.773879	0.797101	0.792439	0.8011	0.749057	0.715371	0.851282	0.793896
12	95073509	-	NR2C1				0.797468	0.867521		0.815385
12	95073531	-	NR2C1	0.809091	0.785714	0.84375	0.934432	0.923119	0.928251	0.926483	0.860759	0.94363
12	95073535	-	NR2C1	0.65121		0.84	0.778095	0.870941	0.893333	0.925394		0.897147
12	95474124	+	METAP2	0.747368				0.793872	0.833333	0.803571
12	95858948	+	SNRPF					0.72807		0.849057
12	95858975	+	SNRPF	0.755141	0.909774	0.929825	0.851985	0.893981	0.915612	0.89893	0.822917	0.906542
12	95858976	+	SNRPF					0.650485
12	95858999	+	SNRPF				0.757576	0.94359	0.958333	0.891346	0.890909	0.909682
12	95859012	+	SNRPF					0.828025		0.754386
12	95859019	+	SNRPF					0.72043
12	96035576	-	LTA4H					0.413265
12	96400496	-	CDK17	0.775928			0.952381	0.909804	1
12	98515591	+	TMPO	0.8	0.691589	0.7	0.790408	0.822314	0.7875	0.72936	0.78125	0.742316
12	98515595	+	TMPO					0.778689	0.797619	0.890909
12	98515648	+	TMPO	0.763636	0.810606		0.783395	0.920635	0.902128	0.878571	0.9	0.961473
12	98515659	+	TMPO	0.830566	0.793359	0.866972	0.907692	0.875923	0.936456	0.929721	0.929592	0.94074
12	98593650	+	SLC25A3	0.753623				0.738562
12	98593658	+	SLC25A3	0.856988	0.783784	0.852632	0.851611	0.953416	0.96124	0.953271	0.846154	0.957746
12	98593699	+	SLC25A3	0.764136	0.863636	0.877323	0.750767	0.906191	0.912903	0.902451	0.91317	0.965278
12	98593708	+	SLC25A3	0.316325	0.541667	0.646154	0.313406	0.511521	0.6	0.72381		0.79639
12	98593731	+	SLC25A3	0.635979	0.755319	0.837838	0.577622	0.934831	0.893617	0.958204	0.953488	0.977536
12	98644740	-	IKBIP	0.736434			0.690476	0.804348	0.647887
12	98644741	-	IKBIP	0.802623			0.731011	0.791045	0.758621
12	100200811	+	ACTR6	0.695652	0.728682	0.727273	0.78764	0.728407	0.795745	0.474456	0.691667	0.634288
12	100200812	+	ACTR6		0.459615	0.517647	0.652778	0.484875	0.578125	0.340313	0.586667	0.482515
12	100200813	+	ACTR6	0.413223	0.469298	0.458065	0.458964	0.363126	0.425134	0.332439	0.648649	0.567843
12	100200818	+	ACTR6	0.408451		0.671429	0.316667	0.631027	0.598214	0.515464		0.326923
12	100200819	+	ACTR6					0.693467
12	100200822	+	ACTR6	0.764427	0.819689	0.876106	0.815323	0.918121	0.876267	0.91239	0.75614	0.936528
12	100200826	+	ACTR6	0.728682	0.79888	0.772414	0.879057	0.915604	0.921296	0.902879	0.979167	0.956491
12	100267277	+	SCYL2					0.79661		0.918033
12	101877764	+	DRAM1	0.760827						0.930588
12	102120087	-	NUP37					0.625
12	102120091	-	NUP37	0.535714	0.454545		0.666667	0.698718	0.735632	0.710145
12	102120092	-	NUP37	0.135719	0.167453	0.142857	0.102987	0.141819	0.138792	0.0923311	0.189474	0.220592
12	102120227	+	PARPBP	0.6	0.791045	0.705882	0.831461	0.75	0.75817	0.869611	0.752	0.69391
12	102120255	+	PARPBP					0.510638				0.473684
12	103930467	+	HSP90B1	0.889874	0.9		0.883923	0.849741	0.875	0.764375	0.842105
12	103930498	+	HSP90B1	0.883453			0.797872			0.849315
12	103957147	-	UQCC6	0.903226	0.846685	0.794595	0.928058	0.899869	0.911602	0.941752	0.895449	0.967572
12	103965888	+	TDG					0.850847				0.730769
12	104138199	-	NFYB	0.797963			0.88172	0.885787	0.905405		0.921875
12	104286938	+	TXNRD1	0.789792	0.827586	0.781818	0.966378	0.928412	0.875	0.932091	0.929577	0.954655
12	104286952	+	TXNRD1	0.74743	0.840909	0.901961	0.981705	0.954248	0.837209	0.978947	0.960784	0.955694
12	104286995	+	TXNRD1	0.765075	0.865646	0.895238	0.920839	0.942446	0.883191	0.9761	0.92268	0.966401
12	104286998	+	TXNRD1	0.846306	0.899329		0.7	0.92203	0.789474		0.989583	0.977971
12	104287008	+	TXNRD1					0.732143
12	104287017	+	TXNRD1	0.737103			0.822785	0.932927	0.857143
12	104287022	+	TXNRD1	0.751357	0.835846	0.850798	0.931318	0.923715	0.879995	0.937284	0.935547	0.960236
12	104287040	+	TXNRD1	0.592112		0.788462	0.752728	0.895495	0.802705	0.897619	0.813333
12	104287049	+	TXNRD1	0.792808	0.962264	1	0.954888	0.946524	0.922802	0.974568	0.968354	0.979608
12	104287051	+	TXNRD1	0.833333					0.766355
12	104287055	+	TXNRD1	0.600137			0.758621	0.851613	0.742115	0.719298
12	104287056	+	TXNRD1	0.320483				0.730159	0.387565
12	104287057	+	TXNRD1	0.612999	0.848101		0.824074	0.888889	0.789524	0.870085	0.864407	0.916667
12	104287077	+	TXNRD1	0.0769231					0.00805351	0.0227052	0	0.0208333
12	104287093	+	TXNRD1	0.468465					0.591304
12	104287096	+	TXNRD1	0.219655			0.06		0.462451
12	104287102	+	TXNRD1	0.0894362			0.0458724	0.259259	0.166147	0.210526	0.186441
12	104287280	+	TXNRD1	0.516129					0.728395
12	104287322	+	TXNRD1	0.735461				0.962963	0.882667	0.890625	0.944444
12	104287324	+	TXNRD1	0.72					0.885496
12	104287342	+	TXNRD1						0.785714
12	104288718	+	TXNRD1						0.729412
12	104288867	+	TXNRD1	0.66129				0.878981	0.673611
12	104288902	+	TXNRD1						0.793651
12	104288925	+	TXNRD1	0.722908	0.847293	0.88	0.934426	0.88691	0.888795	0.925076	0.903586	0.936023
12	104288927	+	TXNRD1	0.640105	0.793256			0.857143	0.782896	0.891892	0.861446	0.904444
12	104288929	+	TXNRD1	0.746134	0.885417			0.942857	0.912643		0.943662	1
12	104288949	+	TXNRD1						0.488636
12	104986345	+	NOPCHAP1				0.703704	0.544776
12	105107715	+	WASHC4					0.741379
12	105236093	-	APPL2	0.653195			0.887097	0.72		0.941176	0.813559
12	106955879	+	TMEM263	0.385189	0.66087		0.640143	0.614311	0.731343	0.822238	0.882353	0.881283
12	106955909	+	TMEM263	0.573752	0.596154		0.544847	0.751371		0.895349
12	106955923	+	TMEM263	0.778467	0.831325		0.920636	0.912807	0.924242	0.920284	0.963855	1
12	107685814	+	PWP1				0.776119	0.908537	0.942308	0.983333
12	108731527	-	CORO1C	0.472066		0.646154	0.75119	0.789326	0.755319	0.814286
12	108857583	-	SSH1	0.763965	0.846939		0.942029	0.945783	0.898734
12	109097617	+	UNG		0.785714		0.930693	0.918987		0.961655		0.965517
12	109098207	+	UNG	0.773577	0.849057		0.9516	0.82716	0.95122	0.938381	0.92562	0.98
12	109098212	+	UNG	0.713594	0.820217		0.911263	0.832258	0.843137	0.886418	0.929825	0.887324
12	109573494	-	MMAB	0.71627	0.736111	0.859649	0.94226	0.890536	0.881818	0.878735	0.862385
12	110281240	+	ATP2A2	0.773585			0.903614	0.861446
12	110450278	-	ARPC3	0.571429			0.740311	0.792793	0.855072
12	110450279	-	ARPC3	0.915711	0.929204	0.960784	0.947745	0.945312	0.944904	0.924051	0.977528	0.72549
12	110468306	-	GPN3					0.838384		0.774648		0.877193
12	110468427	+	FAM216A	0.819111	0.798298	0.874576	0.913384	0.889428	0.927203	0.918145	0.922043	0.958931
12	110502095	-	VPS29					0.730337		0.677419
12	110502098	-	VPS29	0.811765	0.708333	0.789474	0.756757	0.790164	0.75	0.715619	0.81457	0.834627
12	110502101	-	VPS29	0.761905	0.616667		0.728814	0.725373		0.642667	0.675439	0.652489
12	110742914	-	PPP1CC					0.785185	0.921569	0.831169
12	112013131	-	TMEM116	0.915094	0.794521	0.846154	0.930774	0.917004	0.95811	0.946455	0.929412	0.923471
12	112013138	-	TMEM116				0.492308	0.465201	0.397849	0.587101		0.421978
12	112013143	-	TMEM116					0.526786
12	112013440	+	ERP29	0.681387	0.915789	0.890625	0.730096	0.925508	0.855422	0.940486	0.820896
12	112125558	+	TRAFD1	0.740981	0.831858		0.962264	0.918571	0.935065	0.91377		0.957447
12	112409560	-	RPL6				0.797619	0.920664	0.838983	0.874062	0.904762	0.831325
12	112409589	-	RPL6	0.687929	0.572254	0.86385	0.857965	0.756607	0.83739	0.744039	0.860215	0.726852
12	112409609	-	RPL6	0.761645	0.807339	0.822222	0.851433	0.916181	0.906977	0.941138	0.846329	0.922265
12	112409622	-	RPL6					0.790123
12	112409629	-	RPL6	0.777778			0.927273	0.931818	0.983051
12	112906995	+	OAS1				0.758065		0.810127		0.85989
12	113966317	-	RBM19				0.788462	0.765625
12	116738335	+	RNFT2					0.66129				0.588235
12	119178931	+	HSPB8	0.832598			0.82866	0.773148	0.903026	0.868571
12	119178965	+	HSPB8	0.734375
12	120438120	+	COX6A1	0.799014	0.906845	0.934343	0.774447	0.930706	0.933563	0.957658	0.856897	0.967721
12	120438123	+	COX6A1	0.522766	0.553574	0.689629	0.55339	0.70766	0.681973	0.712279	0.495261	0.849179
12	120438124	+	COX6A1	0.1716	0.304912	0.37766	0.220352	0.338614	0.279665	0.319074	0.206865	0.72281
12	120438125	+	COX6A1	0.121666	0.155644	0.134783	0.138424	0.197802	0.212301	0.375667	0.158743	0.385643
12	120438126	+	COX6A1	0.0367881	0.148148	0.10101	0.0590845	0.116183	0.111111	0.150538	0.0981338	0.1875
12	120446348	-	TRIAP1				0.777778	0.870759	0.806452
12	120446352	-	TRIAP1	0.80707	0.731092	0.85	0.892988	0.901838	0.935065	0.947368	0.913043	0.908333
12	120446356	-	TRIAP1	0.794521	0.661538		0.908736	0.866131	0.743056		0.344828	0.675
12	120446368	-	TRIAP1				0.571429	0.880623	0.857143	0.980392		0.921053
12	120446381	-	TRIAP1	0.784767	0.794358	0.858034	0.922094	0.905932	0.928631	0.925971	0.952609	0.954862
12	120446468	+	GATC	0.512821		0.518519	0.501337	0.504997	0.597701	0.464286		0.37037
12	120446473	+	GATC	0.635896	0.677778	0.729323	0.697842	0.681755	0.738676	0.630681	0.814815	0.755322
12	120446476	+	GATC				0.712061	0.654596	0.5			0.673684
12	120446477	+	GATC	0.924731	0.897158	0.878505	0.953252	0.879624	0.789116	0.801316	0.744	0.889477
12	120496122	+	DYNLL1	0.511313			0.609127	0.840467	0.875	0.87037	0.8	0.852273
12	120534377	+	RNF10	0.839152	0.796053	0.883495	0.889083	0.948634	0.964029	0.965689	0.956989	0.983562
12	120581402	-	POP5	0.683181	0.758621	0.694915	0.905594	0.793255	0.805031	0.891317	0.796117	0.835232
12	120687158	+	MLEC	0.702324	0.688073		0.784647	0.647887	0.853801	0.557672	0.780142	0.706349
12	120687159	+	MLEC	0.837945	0.726027		0.881402	0.767213	0.807339	0.899083	0.859504	0.755814
12	120687162	+	MLEC	0.428571	0.409836		0.565217	0.196262	0.231579	0.211268	0.161616	0.275862
12	120687165	+	MLEC	0.775325	0.6		0.827831	0.547619	0.559585	0.667384	0.551724	0.591683
12	121016495	-	C12orf43	0.537313		0.89899	0.482759	0.866013	0.888889	0.929825	0.82	0.957627
12	121038975	-	OASL	0.505155	0.756033			0.929204	0.95082		0.906341	0.95
12	121038977	-	OASL	0.46988	0.706019			0.912088	0.890244		0.807918	0.955005
12	121580249	-	KDM2B					0.646512	0.545455			0.624902
12	121888772	+	PSMD9	0.784615				0.936047
12	122226015	-	DIABLO	0.756932			0.84107	0.833333	0.844828
12	122527249	+	KNTC1	0.831249	0.775026	0.699678	0.960216	0.900865	0.951756	0.919304	0.917915	0.938088
12	122527254	+	KNTC1		0.845361	0.795455	0.786667	0.881579	0.869048	0.91369	0.805556	0.943988
12	122974797	+	OGFOD2				0.769231	0.89881				0.96
12	122980704	+	ARL6IP4					0.741007
12	123271812	-	CDK2AP1	0.79798	0.951613			0.869565	0.896552	0.932773		0.967949
12	123384092	+	KMT5A		0.886792	0.790123		0.927461	0.971698			0.957832
12	124863892	-	SCARB1				0.701094	0.796875		0.919355
12	124914591	-	UBC	0.385923	0.455882	0.725806	0.360544	0.762069	0.615871	0.61039	0.817308	0.764706
12	124914606	-	UBC	0.392405			0.419355	0.928854	0.625	0.846154
12	124914621	-	UBC	0.490296						0.943466
12	124914650	-	UBC	0.782184	0.88366	0.900839	0.925756	0.932482	0.908952	0.948655	0.952488	0.973341
12	124914656	-	UBC	0.777778	0.877193	0.904255	0.944444	0.955714	0.933649	0.955056	0.910714	0.981424
12	124989117	-	DHX37	0.808219	0.724638		0.951456	0.898305	0.872093	0.958763		0.94494
12	130872068	+	RAN	0.688707	0.855769	0.929412	0.674633	0.857284	0.883436	0.922414	0.875	0.942289
12	132829050	-	GOLGA3	0.799299		0.724138	0.920987	0.921429	0.951807	0.914634
13	20773948	-	EEF1AKMT1					0.755906
13	20902767	-	XPO4					0.796875
13	21061549	-	LATS2	0.790196			0.935084	0.888889	0.916667	0.923247	0.807018
13	21176667	+	MRPL57	0.785217	0.909908		0.906841	0.863428	0.878571	0.909988	0.926108	0.90438
13	24922827	-	CENPJ	0.833333	0.772727	0.799283	0.890864	0.878099	0.915423	0.961675	0.881781	0.962132
13	25287486	-	MTMR6	0.791274	0.962963		0.923077	0.935593	0.961039		0.953846	0.968085
13	26221804	-	RNF6	0.772086	0.815189	0.7375	0.952877	0.895652	0.835294	0.931003	0.90566	0.953059
13	27251337	+	RPL21				0.633803	0.761905		0.803279	0.737705
13	27251338	+	RPL21				0.572917	0.659615		0.711864	0.703125
13	27251362	+	RPL21	0.849859	0.753236	0.917258	0.949907	0.915557	0.97076	0.940587	0.946363	0.911885
13	27251584	+	RPL21	0.792726	0.879285	0.89	0.934242	0.938424	0.931429	0.86235	0.950464	0.98349
13	27251588	+	RPL21	0.754295	0.884793		0.925726	0.903114	0.942857	0.875308	0.938272	0.937997
13	27270830	+	RASL11A	0.734573			0.945455	0.861878	0.873239	0.810961	0.893333
13	27450186	-	MTIF3	0.775281				0.896907			0.988095
13	27450533	-	MTIF3	0.753086			0.881699	0.933198	0.95082	0.989362	0.948387	0.996094
13	27450536	-	MTIF3	0.711111			0.819927	0.938824		0.924242	0.926102	0.977478
13	27450538	-	MTIF3	0.79646	0.813559		0.920513	0.904234	0.969231	0.929293	0.941606	0.967889
13	28659161	+	POMP	0.77193				0.84022		0.480769	0.642487	0.750173
13	30465910	-	HMGB1	0.91341	0.910314	0.75	0.896919	0.88033	0.815261	0.84375	0.75	0.783784
13	31161945	-	HSPH1	0.799745	0.842246	0.941788	0.920245	0.908637	0.92004	0.936842	0.950202	0.963608
13	31161975	-	HSPH1	0.560606			0.649123	0.822511
13	31162001	-	HSPH1		0.627451			0.806075		0.705128	0.754386
13	33285755	-	STARD13	0.77675			0.910999
13	36999307	-	ALG5	0.797832			0.902692	0.878193	0.893333	0.897959	0.891026	0.908046
13	37000782	+	EXOSC8		0.781022		0.9	0.864865	0.845238	0.885049	0.727273	0.910711
13	37000803	+	EXOSC8	0.878378	0.746269	0.891892	0.938053	0.903034	0.923077	0.843299	0.916608	0.908696
13	37000804	+	EXOSC8	0.909091	0.770833	0.9	0.942617	0.916579	0.79661	0.897811	0.891609	0.899251
13	38349859	+	UFM1	0.78468	0.856787	0.805808	0.789165	0.767301	0.820311	0.811491	0.898904	0.89434
13	38349902	+	UFM1	0.790969		0.905405	0.870639	0.952532	0.909091	0.934066	0.8475	0.925532
13	38349906	+	UFM1	0.687318			0.590488	0.921387	0.818182	0.879518	0.819277	0.892742
13	39038061	-	PROSER1			0.815789	0.9515	0.843913	0.887755	0.797514	0.863122	0.923851
13	39038086	-	PROSER1	0.639943	0.539888	0.533333	0.647893	0.62149	0.673797	0.33816	0.524138	0.477216
13	40771152	-	MRPS31	0.724638	0.887218	0.856115	0.806068	0.935484	0.894737	0.919482	0.923007	0.956827
13	40771174	-	MRPS31	0.782051	0.741379	0.872483	0.836983	0.921376	0.912281	0.965058	0.895238	0.978831
13	40771211	-	MRPS31		0.909091		0.907692	0.85061				0.766667
13	41019302	-	ELF1		0.532258	0.782946	0.789931		0.911699	0.792453	0.819672	0.804212
13	41019316	-	ELF1		0.69063	0.746491	0.88287	0.89243	0.891069	0.855264	0.823621	0.836311
13	41019324	-	ELF1		0.731959	0.701754	0.838889	0.8875	0.851528	0.853659	0.823158	0.865062
13	41019333	-	ELF1		0.720317	0.83758	0.867091	0.858537	0.91195	0.920795	0.843996	0.882536
13	41019343	-	ELF1				0.842105		0.882353		0.796296	0.819856
13	41019366	-	ELF1			0.76				0.858696	0.765306	0.851473
13	44436847	-	TSC22D1	0.777282	0.75		0.867155	0.797468	0.849057		0.880597
13	44989442	-	NUFIP1	0.737521	0.815152	0.846154	0.911646	0.899614	0.976562	0.928175	0.885572	0.95375
13	44989471	-	NUFIP1	0.777218	0.788269	0.820144	0.931436	0.903035	0.923803	0.914124	0.951734	0.95378
13	44989558	+	GPALPP1	0.779661				0.89011
13	44989566	+	GPALPP1	0.787079	0.837838	0.86755	0.911516	0.918013	0.919307	0.938836	0.880095	0.962549
13	45341101	-	TPT1	0.349398			0.135417	0.700809	0.792453			0.491228
13	45341106	-	TPT1	0.561707	0.564706	0.921739	0.401793	0.847334	0.859031	0.509804	0.697732	0.717647
13	45341117	-	TPT1	0.741064	0.578947	0.741379	0.410139	0.816044	0.861789		0.413462	0.364865
13	45341123	-	TPT1	0.611823			0.22	0.696356			0.522124
13	45341210	-	TPT1	0.754717	0.861111		0.853211	0.886468	0.844828	0.949104	0.94186	0.977183
13	48037726	+	NUDT15				0.763441	0.68559		0.783333
13	48233185	+	ITM2B	0.795455			0.675908	0.808642		0.746032
13	48413118	-	LPAR6	0.693548			0.873082			0.888425	0.884712	0.885869
13	49110305	+	FNDC3A	0.713091			0.67136			0.502701
13	49110306	+	FNDC3A	0.691796			0.532099			0.585751
13	49110307	+	FNDC3A	0.734887			0.734389			0.586003
13	49110308	+	FNDC3A	0.826772			0.704482			0.858841
13	49110310	+	FNDC3A	0.75			0.693548
13	49110324	+	FNDC3A	0.599473	0.734043		0.696841	0.847185	0.868613	0.894805	0.794118	0.870907
13	49444033	-	CAB39L	0.793103				0.915254
13	49444039	-	CAB39L	0.753577			0.948052	0.914773		0.981481	0.981132
13	49444048	-	CAB39L	0.802938	0.79661		0.984127	0.90625			0.892857
13	49444057	-	CAB39L	0.777778
13	49444062	-	CAB39L	0.727733	0.930233		0.912367	0.887608	0.901099	0.915254	0.901786	0.942308
13	49691459	-	EBPL	0.736842			0.928467	0.925311
13	52455482	+	CKAP2	0.745098	0.815217			0.865714		0.91093	0.890909	0.890835
13	52652842	+	SUGT1	0.783784	0.891538	0.945455	0.753846	0.923611	0.947368	0.947431	0.963964	0.98602
13	72727923	+	BORA	0.673913	0.782946	0.732143	0.774172	0.731603	0.7875	0.777778	0.878979	0.934141
13	72727924	+	BORA					0.541985
13	72781917	-	DIS3					0.744027
13	72781920	-	DIS3					0.76555				0.722222
13	73059005	+	KLF5	0.781623	0.79687		0.878788	0.87041	0.880036	0.866643	0.865758
13	75760700	+	LMO7				0.760417		0.893617	0.827586	0.835714
13	75760721	+	LMO7				0.32716		0.649485	0.446154	0.673469
13	77027196	-	FBXL3	0.742138	0.816794		0.780488	0.785075		0.886792		0.774648
13	78659163	-	OBI1	0.797059	0.914062		0.955752	0.944056	0.97561	0.966942		0.971698
13	79406255	-	RBM26	0.883419	0.929577	0.796296	0.944697	0.936407	0.952381	0.962025	0.899225
13	85799386	-	SLITRK6						0.90625		0.789474
13	97222304	+	MBNL2					0.711864
13	97222313	+	MBNL2	0.923126	0.769231		0.909091	0.918182	0.931034			0.964746
13	97222326	+	MBNL2	0.854685	0.762829	0.893333	0.928286	0.904936	0.906977	0.826923	0.915028	0.96191
13	97222352	+	MBNL2	0.806022	0.786885		0.850794	0.927393	0.923077	0.9	0.850575	0.941176
13	97222358	+	MBNL2	0.728261			0.681818	0.777778			0.830508
13	102798974	-	POGLUT2				0.727273	0.910847		0.983048		0.945946
13	102799144	+	BIVM	0.764151			0.933093	0.948187				0.9476
13	102846089	+	ERCC5	0.791092			0.945023	0.873156	0.956522	0.93913	0.91195	0.962051
13	102846100	+	ERCC5	0.684211			0.821429	0.924528		0.94		0.961755
13	102846116	+	ERCC5	0.745098				0.862069				0.942222
13	106568156	-	ARGLU1	0.738685	0.708861		0.734749	0.785263	0.802817
13	109786576	-	IRS2	0.781818
13	110307157	-	COL4A1	0.56937				0.814394	0.714286
13	110615545	+	NAXD	0.774427	0.738095		0.926665	0.891026	0.931034		0.900476	0.880387
13	112588169	-	TUBGCP3	0.743119	0.928571		0.950617	0.938053	0.953271		0.916667
13	113208667	-	PCID2	0.771429			0.810526	0.933735
14	20455244	+	APEX1	0.861521	0.830289	0.811594	0.855823	0.860573	0.873125	0.789102	0.88959	0.862369
14	20455299	+	APEX1				0.712329	0.953571		0.941176
14	20684591	+	ENSG00000259171	0.78125			0.862738	0.939024	0.901408	0.931624
14	20990003	+	METTL17		0.80303	0.666667	0.86949	0.887868	0.924051	0.904701		0.95415
14	21269408	-	HNRNPC	0.378788	0.305263		0.227056	0.381279	0.485714	0.3705		0.456119
14	21269415	-	HNRNPC	0.773297	0.668371	0.552941	0.804248	0.749885	0.697452	0.638116	0.4375	0.729365
14	21476647	-	RAB2B	0.873418	0.742424		0.915389	0.885714	0.951456	0.901961
14	21476859	-	RAB2B				0.775	0.845455				0.985075
14	21511254	-	METTL3		0.788462		0.951923	0.928205	0.958333	0.947799
14	21511296	-	METTL3				0.705882	0.84058		0.842105
14	22589161	-	DAD1	0.747731		0.875	0.789741	0.815789	0.79021	0.931091	0.894737	0.958932
14	22589175	-	DAD1	0.837727	0.619048	0.914634	0.835294	0.781145	0.792746	0.860624	0.893805	0.945881
14	22589180	-	DAD1				0.75	0.886792
14	22589222	-	DAD1	0.620417	0.836538		0.565277	0.894825	0.879121	0.930882	0.9	0.931034
14	22589229	-	DAD1	0.754184	0.915254		0.690484	0.910233	0.921147	0.946129	0.868852	0.966292
14	22589230	-	DAD1	0.73141	0.87963		0.720126	0.927449	0.916279	0.941126	0.921875	0.964912
14	22598293	+	ABHD4	0.77137			0.912311	0.874494	0.816036	0.845811
14	22598294	+	ABHD4	0.858824			0.87395	0.968254	0.798561
14	22598307	+	ABHD4	0.547619			0.847794		0.798611	0.912281
14	22766677	+	OXA1L				0.783019	0.96732	0.935897	0.972222		0.981132
14	22829910	+	MRPL52	0.648928			0.689039	0.943089	0.818182	0.989899		0.972603
14	22929367	-	PRMT5	0.852273	0.847222	0.828877	0.825653	0.807246	0.888298	0.783642	0.853333	0.878099
14	22929370	-	PRMT5					0.566372		0.565217		0.797468
14	22957117	-	HAUS4	0.767857		0.915663	0.90768	0.888087	0.944444			0.944007
14	22976804	-	AJUBA	0.717647			0.937799	0.960784	0.934783	0.91648	0.925532
14	22982613	-	AJUBA	0.591241	0.62963		0.590698	0.602015	0.614634	0.669108	0.758065	0.883652
14	23010129	-	C14orf93	0.746835	0.902174	0.868421	0.899264	0.935329	0.95	0.96416	0.952756	0.941075
14	23034807	-	PSMB5				0.428571	0.907563
14	23034881	-	PSMB5	0.372841			0.542134	0.615721	0.605042	0.735895
14	23035133	-	PSMB5				0.645161	0.927711
14	23035224	-	PSMB5				0.794907	0.887324	0.887097
14	23071579	-	ACIN1	0.758621	0.871795		0.881905	0.920177	0.884615	0.954555		0.976259
14	23095542	+	C14orf119	0.777542	0.825581		0.823021	0.908072	0.888889	0.773718	0.842105	0.845054
14	23095550	+	C14orf119	0.865209	0.846904	0.716667	0.904422	0.884228	0.774436	0.801162	0.853403	0.882223
14	23095563	+	C14orf119	0.782689	0.862263	0.860656	0.921628	0.884072	0.937336	0.941326	0.938084	0.966071
14	23321960	+	PABPN1				0.942857	0.775701	0.844828	0.919355
14	23321979	+	PABPN1				0.732394
14	23636367	+	DHRS2	0.666667	0.794118	0.741007	0.820892	0.808864	0.913043	0.828055	0.882812
14	23953772	+	DHRS4	0.662963	0.830357		0.712128	0.911612	0.86875	0.947917	0.932584	0.981076
14	23953789	+	DHRS4				0.594203
14	24216063	-	MDP1	0.730769			0.835052	0.946768
14	24232454	+	GMPR2	0.797743	0.790064	0.809091	0.953693	0.89692	0.935435	0.876019	0.9	0.96819
14	24232629	+	GMPR2	0.754717			0.786517	0.912162
14	24299842	+	NOP9	0.736842			0.968818	0.852	0.921875	0.981481		0.928592
14	24299863	+	NOP9	0.735849			0.68245	0.873786
14	30559160	+	G2E3				0.657143	0.862069	0.965517	0.956443
14	30622319	+	SCFD1	0.713912	0.78932	0.808436	0.880076	0.841863	0.89333	0.89224	0.905104	0.930196
14	31420548	-	HEATR5A	0.824921	0.761364		0.848521	0.813679	0.789744	0.88327	0.822917	0.830189
14	31457433	-	ENSG00000203546	0.678571			0.767682	0.856322	0.912281	0.89078
14	31457435	-	ENSG00000203546	0.825463	0.795699		0.9333	0.888068	0.895522	0.926909		0.945836
14	32077074	+	ARHGAP5		0.819277		0.616391	0.652459	0.755556	0.74796	0.925926
14	34462238	-	SPTSSA				0.620668	0.880952	0.846154
14	34539666	-	EAPP	0.78293	0.763158	0.867925	0.911598	0.926123	0.875912	0.964605	0.931034
14	34539686	-	EAPP	0.79758	0.736841	0.877551	0.929492	0.888158	0.926369	0.873812	0.937063	0.930197
14	34539692	-	EAPP	0.731707			0.894861	0.884679	0.913043	0.909091		0.861702
14	34539697	-	EAPP	0.769231	0.810345		0.817204	0.905039	0.932203	0.945455		0.92562
14	34539721	-	EAPP	0.825	0.825346	0.788462	0.936601	0.886525	0.902892	0.957532	0.884444	0.963518
14	34630158	-	SNX6	0.792793	0.849057		0.832673	0.83208	0.924528
14	34714555	-	CFL2	0.783027			0.875024	0.858093	0.884615
14	34714571	-	CFL2	0.631579			0.833333	0.756757
14	34714593	-	CFL2	0.784722	0.763636		0.922815	0.895131	0.947368
14	34983073	+	SRP54	0.794292		0.827434	0.906972	0.891107	0.932617	0.923233	0.857143	0.942665
14	35046460	+	FAM177A1	0.777778			0.877778
14	35122264	-	PPP2R3C	0.769231			0.667935	0.684564	0.8			0.784091
14	35122547	+	PRORP	0.820023	0.75138	0.853994	0.938613	0.921943	0.950734	0.940943	0.952562	0.967215
14	35122568	+	PRORP	0.702899	0.84	0.68	0.899799	0.890995	0.876289	0.905142	0.933333	0.913786
14	35122579	+	PRORP	0.702703	0.780488	0.846154	0.847518	0.888337	0.863248	0.925725	0.940299	0.91613
14	35122606	+	PRORP				0.926316	0.758065
14	35122607	+	PRORP					0.746667
14	35292361	+	PSMA6	0.86			0.582524	0.878431	0.813953	0.866667		0.682692
14	35292362	+	PSMA6				0.841463	0.8625	0.829545			0.717172
14	35292364	+	PSMA6				0.633333	0.753623
14	35292384	+	PSMA6	0.847077			0.817393	0.778443	0.691176	0.885965	0.931034	0.931732
14	35292398	+	PSMA6	0.773333			0.829787	0.930636	0.903846			0.866667
14	35292407	+	PSMA6	0.73139	0.794872	0.745763	0.764884	0.741557	0.698398	0.648377	0.816993	0.752213
14	35292431	+	PSMA6				0.824074	0.894309		0.763636		0.865079
14	35292457	+	PSMA6	0.364964		0.865672	0.470746	0.836207	0.806818	0.91054	0.792453	0.899387
14	35292462	+	PSMA6	0.6			0.548449	0.885714	0.824	0.905263		0.952731
14	35403790	-	NFKBIA				0.902098		0.785714	0.873106
14	35404747	-	NFKBIA				0.789474
14	35404749	-	NFKBIA	0.755017	0.765432		0.869592	0.857843	0.883495	0.842639
14	36320631	-	MBIP	0.681818	0.903226	0.740741	0.833004	0.920721	0.878788	0.969231	0.923077	0.96
14	39103158	-	SEC23A	0.78933			0.95236	0.953368		0.949425	0.94
14	39114334	+	GEMIN2				0.467532	0.680511				0.925926
14	49586349	-	RPS29	0.797619			0.87027	0.875445	0.945455
14	49586401	-	RPS29					0.644068
14	49586403	-	RPS29	0.75	0.807099	0.791667	0.834783	0.752788	0.830688	0.881423	0.854701	0.836905
14	49586404	-	RPS29	0.716874	0.452632	0.6375	0.646483	0.689389	0.631591	0.364509	0.693467	0.533931
14	49586409	-	RPS29	0.509804	0.636364		0.292135	0.741758	0.76	0.824561	0.683333	0.90696
14	49586410	-	RPS29	0.669565	0.714286	0.753623	0.652653	0.846667	0.755187	0.905816	0.77193	0.850036
14	49586411	-	RPS29	0.795596	0.811168	0.898955	0.838432	0.905413	0.911119	0.95122	0.865313	0.968277
14	49586412	-	RPS29	0.802476	0.793581	0.92599	0.864328	0.910612	0.919639	0.945086	0.91697	0.982492
14	49598975	+	LRR1					0.873563	0.851852			0.767857
14	49598979	+	LRR1					0.784314	0.653846			0.583333
14	49620583	-	RPL36AL	0.433333			0.531646	0.678161	0.38	0.679245		0.859155
14	49620599	-	RPL36AL	0.712843	0.7933	0.732143	0.795615	0.790666	0.72033	0.871662	0.860861	0.84334
14	49620605	-	RPL36AL	0.616822	0.683544		0.5625	0.68	0.705882	0.805195		0.79661
14	49620801	+	MGAT2	0.847899	0.784	0.873494	0.944704	0.905415	0.955157	0.942989	0.958919	0.925092
14	49688207	-	POLE2		0.754098	0.791367	0.771094	0.717668	0.697917	0.947917	0.818182	0.918367
14	49688212	-	POLE2		0.933333	0.885246	0.697368	0.944793	0.962025	1	0.925926	0.977286
14	49688213	-	POLE2		0.8125	0.846154	0.663028	0.867014	0.878049	0.949153	0.951613	0.95
14	49852786	-	NEMF	0.78749			0.778041	0.820423	0.848684	0.90411
14	49852820	-	NEMF					0.60241
14	49892995	+	ARF6	0.660565			0.90625	0.821782	0.875	0.863636
14	50668306	-	SAV1	0.794317	0.824678	0.783333	1	0.919717	0.923077	0.883117	0.876	0.942308
14	50668331	-	SAV1	0.724138	0.792451			0.905956				0.980392
14	50668336	-	SAV1	0.754718	0.853218	0.907895	0.962963	0.913717	0.917808	0.939024	0.887931	0.975
14	50668337	-	SAV1	0.69863				0.827273
14	50668338	-	SAV1	0.799665	0.83871	0.869565	0.948454	0.909986	0.960227		0.850575
14	51240247	+	TMX1	0.775576	0.780233	0.785714	0.93764	0.860611	0.925187	0.880858	0.866279	0.919533
14	51651982	+	FRMD6	0.778604				0.907692	0.91358
14	51651985	+	FRMD6	0.731882
14	52707203	+	PSMC6	0.712487	0.79798		0.65522	0.754595	0.739645	0.721649	0.816901	0.84
14	52707232	+	PSMC6					0.610738		0.901235
[truncated: 14,757 more rows]

## Sheet: 3. Low m6Am (histone)
Note: only m6Am sites >= 50 reads mapped are shown.
Chr	Position (hg38, 1-based)	Strand	gene	Histone gene cluster	CCD841	HCT116	K562	HepG2	HEK293T	HEK293T_FTOKO	HEK293T_PCIF1KO	A549	Huh7	HT29	Jurkat
1	149812352	-	H2BC18	1q21.1-2					0.015873		0	0.0555556
1	149812360	-	H2BC18	1q21.1-2					0.711538		0
1	149812370	-	H2BC18	1q21.1-2	0.517573	0.605215	0.706622	0.744614	0.706579	0.778237	0.00605589	0.772454	0.827266	0.801317	0.694319
1	149832655	+	H4C14	1q21.1-2					0.860697			0.881579	0.865854		0.828571
1	149832657	+	H4C14	1q21.1-2		0.815871	0.791367	0.911905	0.853257	0.879732	0.00119048	0.887314	0.93095	0.921241	0.854751
1	149861159	-	H4C15	1q21.1-2		0.805825	0.816901	0.942623	0.874627	0.825151	0.00535176	0.899977	0.866978	0.941799	0.819811
1	149861161	-	H4C15	1q21.1-2					0.83156		0	0.875	0.846154		0.802157
1	149886682	-	H2BC21	1q21.1-2	0.704694	0.608085	0.735825	0.89206	0.870436	0.900552	0.00567399	0.847026	0.894111	0.860637	0.805837
1	149886918	+	H2AC20	1q21.1-2	0.730053	0.535158	0.548188	0.898841	0.825375	0.868619	0.00342663	0.841075	0.808141	0.724048	0.737198
1	149886919	+	H2AC20	1q21.1-2	0.864671	0.800286	0.771451	0.91364	0.910481	0.925341	0.00435534	0.920176	0.94893	0.915398	0.904029
1	149886924	+	H2AC20	1q21.1-2	0.45614	0.592684	0.739669	0.617878	0.778786	0.809158	0.00482724	0.785305	0.871526	0.626878	0.791833
1	149887961	-	H2AC21	1q21.1-2		0.612245	0.777778	0.462194	0.769697	0.641509	0	0.826087	0.90411	0.724762	0.816615
1	149887963	-	H2AC21	1q21.1-2	0.658271	0.64244	0.742555	0.845735	0.80184	0.870391	0.00500804	0.843306	0.885777	0.837607	0.834473
1	149886653	-	H2BC21	1q21.1-2					0.949153
6	26017785	-	H1-1	6p22.1-2									0.831779
6	26020456	+	H3C1	6p22.1-2	0.659226	0.567629	0.8		0.795217	0.862446	0.00281503	0.837963	0.84064	0.830961	0.689695
6	26021607	+	H4C1	6p22.1-2					0.795699				0.836364		0.85502
6	26021649	+	H4C1	6p22.1-2	0.644589	0.621057	0.752326	0.815083	0.767436	0.784749	0.00456035	0.774846	0.809587	0.864565	0.819745
6	26027281	-	H4C2	6p22.1-2	0.578947	0.641509	0.715909	0.794082	0.76556	0.827703	0.00294118	0.795505	0.869578	0.899856	0.796548
6	26027341	-	H4C2	6p22.1-2					0.901639
6	26032080	-	H3C2	6p22.1-2					0.111111
6	26032081	-	H3C2	6p22.1-2				0	0.0829146	0.0384615	0	0.0196078
6	26032097	-	H3C2	6p22.1-2	0.671875	0.725581	0.766667	0.810398	0.880466	0.867125	0.0102647	0.881696	0.921263	0.792099	0.843553
6	26032099	-	H3C2	6p22.1-2	0.555848	0.603603	0.714562	0.802339	0.77528	0.828096	0.00469357	0.763292	0.836367	0.857462	0.77521
6	26032122	-	H3C2	6p22.1-2					0.9625
6	26033616	-	H2AC4	6p22.1-2				0.746254	0.586667	0.827435		0.704918			0.671469
6	26033782	+	H2AC4	6p22.1-2								0.66	0.830769
6	26043711	-	H2BC3	6p22.1-2	0.347222			0.695942				0.72038	0.818621	0.647638
6	26043951	+	H2AC5P	6p22.1-2				0.868687					0.889676
6	26045381	+	H3C3	6p22.1-2									0.913506
6	26045384	+	H3C3	6p22.1-2	0.52666			0.770658				0.731277	0.808227	0.822608	0.680063
6	26045386	+	H3C3	6p22.1-2	0.612			0.766176				0.894039	0.93005	0.889143	0.867244
6	26056456	-	H1-2	6p22.1-2	0.626374		0.766667	0.534083	0.805687	0.795455	0		0.896104		0.8375
6	26056470	-	H1-2	6p22.1-2	0.78043	0.667796	0.822549	0.860927	0.839873	0.866346	0.00532629	0.855576	0.933054	0.869586	0.783987
6	26103933	+	H4C3	6p22.1-2	0.759596	0.740071	0.763042	0.898862	0.821973	0.862951	0.00967584	0.873557	0.920683	0.896898	0.85716
6	26103939	+	H4C3	6p22.1-2					0.173913
6	26103941	+	H4C3	6p22.1-2					0.745098						0.8125
6	26103972	+	H4C3	6p22.1-2					0.0363636
6	26103974	+	H4C3	6p22.1-2							0.04
6	26103984	+	H4C3	6p22.1-2					0.0714286		0.03125
6	26103985	+	H4C3	6p22.1-2					0.038961		0.0515464
6	26104035	+	H4C3	6p22.1-2							0.0121951
6	26104040	+	H4C3	6p22.1-2				0.037037	0		0.003125
6	26104041	+	H4C3	6p22.1-2							0
6	26104042	+	H4C3	6p22.1-2							0
6	26104050	+	H4C3	6p22.1-2							0
6	26104086	+	H4C3	6p22.1-2					0.673077
6	26104136	+	H4C3	6p22.1-2					0.870968
6	26104146	+	H4C3	6p22.1-2			0.895522		0.904762			0.910714
6	26108135	-	H1-6	6p22.1-2							0.03125				0.79
6	26123748	-	H2BC4	6p22.1-2					0.870968						0.831169
6	26123792	-	H2BC4	6p22.1-2					0.835616
6	26123921	-	H2BC4	6p22.1-2				0.122222	0.373494
6	26123923	-	H2BC4	6p22.1-2	0.596774	0.62341	0.729032	0.735801	0.882674		0	0.876623	0.865756	0.6857	0.843038
6	26123925	-	H2BC4	6p22.1-2		0.594203	0.7375	0.804348	0.868014		0.0172414	0.857143	0.905786	0.821782	0.83223
6	26123973	-	H2BC4	6p22.1-2				0.905405	0.883117
6	26124124	+	H2AC6	6p22.1-2			0.810345		0.909091
6	26124173	+	H2AC6	6p22.1-2	0.732143		0.764368	0.79661	0.838889		0.0103093	0.89404	0.864664		0.72104
6	26156331	+	H1-4	6p22.1-2		0.520548	0.634921	0.669946	0.591806	0.594595	0.00409836	0.632075	0.722222	0.785714	0.6
6	26156341	+	H1-4	6p22.1-2					0.78481
6	26158122	+	H2BC5	6p22.1-2	0.747522	0.66911	0.825148	0.895541	0.851785	0.883139	0.00423501	0.883629	0.921763	0.855973	0.828145
6	26158125	+	H2BC5	6p22.1-2	0.709204	0.675872	0.800413	0.840512	0.795029	0.853025	0.00406797	0.852822	0.927719	0.849116	0.82882
6	26158133	+	H2BC5	6p22.1-2					0.443299
6	26158154	+	H2BC5	6p22.1-2	0.186441	0.262295	0.48	0.116405	0.538462	0.385965	0	0.540541		0.594937	0.802817
6	26158155	+	H2BC5	6p22.1-2				0.0107527
6	26158158	+	H2BC5	6p22.1-2	0.0328947	0.0989011	0.0649351	0.0171823	0.136929	0.0923077	0	0.0833333		0.213483	0.391892
6	26158161	+	H2BC5	6p22.1-2				0.0326087	0.294872
6	26158185	+	H2BC5	6p22.1-2					0.0153846
6	26158282	+	H2BC5	6p22.1-2					0.911765			0.848485			0.8
6	26158286	+	H2BC5	6p22.1-2		0.724138	0.861111		0.862069		0.0277778	0.910891		0.876712	0.8125
6	26183756	+	H2BC6	6p22.1-2								0.886926	0.889281	0.895984
6	26183761	+	H2BC6	6p22.1-2	0.661024							0.845626	0.92669	0.889163
6	26189110	-	H4C4	6p22.1-2	0.662651	0.691997	0.790262	0.865989	0.81121	0.850234	0.00440413	0.847004	0.888952	0.836928	0.838237
6	26195539	+	H1-12P	6p22.1-2								0.922414			0.869565
6	26195546	+	H1-12P	6p22.1-2								0.946602			0.902424
6	26195554	+	H1-12P	6p22.1-2								0.9			0.805556
6	26199254	-	H2AC7	6p22.1-2					0.88
6	26199293	-	H2AC7	6p22.1-2	0.542266	0.501881	0.538705	0.74572	0.748315	0.817651	0.00451847		0.819947	0.735493	0.741099
6	26199453	+	H2BC7	6p22.1-2					0.767857		0.0298507				0.492063
6	26199461	+	H2BC7	6p22.1-2											0.72
6	26199468	+	H2BC7	6p22.1-2											0.847222
6	26199487	+	H2BC7	6p22.1-2	0.62766	0.620862	0.743501	0.886629	0.845765	0.962617	0.00284091		0.89111	0.844784	0.817523
6	26199489	+	H2BC7	6p22.1-2		0.56044	0.64878	0.622917	0.726708		0		0.800654	0.67327	0.733214
6	26199493	+	H2BC7	6p22.1-2					0.87931						0.724138
6	26199516	+	H2BC7	6p22.1-2	0.500363	0.530008	0.625443	0.790022	0.778943	0.819386	0.00300382		0.853804	0.77356	0.755703
6	26199522	+	H2BC7	6p22.1-2			0.67148	0.436802	0.801843	0.766667	0		0.752137	0.617647	0.584524
6	26199552	+	H2BC7	6p22.1-2				0.686275	0.846154						0.743483
6	26204526	+	H4C5	6p22.1-2					0.95082
6	26204529	+	H4C5	6p22.1-2					0.886792
6	26204531	+	H4C5	6p22.1-2					0.895522
6	26204552	+	H4C5	6p22.1-2			0.822581	0.87234	0.902655		0.00862069	0.896552
6	26204559	+	H4C5	6p22.1-2				0.955882	0.935		0	0.916667
6	26204610	+	H4C5	6p22.1-2	0.812857	0.823761	0.872964	0.927622	0.909339	0.919643	0.00530713	0.922648	0.957343	0.952478	0.933774
6	26204612	+	H4C5	6p22.1-2			0.705882	0.278469	0.713467		0.00828108	0.674847	0.785714		0.766354
6	26204624	+	H4C5	6p22.1-2				0.0285714	0.522388		0
6	26204686	+	H4C5	6p22.1-2							0.0289855
6	26216659	-	H2BC8	6p22.1-2	0.684932		0.791045	0.830319					0.870047	0.828493	0.680532
6	26216674	-	H2BC8	6p22.1-2				0.05
6	26216684	-	H2BC8	6p22.1-2	0.358491		0.561224	0.472418					0.571787	0.578704	0.455128
6	26216688	-	H2BC8	6p22.1-2	0.546985		0.731724	0.810367	0.757042	0.830561			0.871266	0.797696	0.728602
6	26216921	+	H2AC8	6p22.1-2	0.588303		0.678027	0.860854	0.855442	0.877356	0		0.872009	0.786486	0.709454
6	26224146	+	H3C6	6p22.1-2					0.912281
6	26224156	+	H3C6	6p22.1-2		0.857143		0.872727	0.966102	0.929825		0.942029	0.910448
6	26224173	+	H3C6	6p22.1-2		0.846154				0.830189			0.940299
6	26224178	+	H3C6	6p22.1-2		0.783217		0.914359	0.922981	0.94571	0.00147493	0.956033	0.971536	0.879121
6	26224202	+	H3C6	6p22.1-2				0.828571	0.872549		0.00849934	0.926606
6	26224209	+	H3C6	6p22.1-2					0.811321
6	26224222	+	H3C6	6p22.1-2				0.904762	0.845588		0	0.868852	0.867404	0.807018
6	26224225	+	H3C6	6p22.1-2					0.885417
6	26224236	+	H3C6	6p22.1-2		0.743902		0.814815	0.827089		0	0.849315	0.867932	0.733945
6	26225135	+	H3C6	6p22.1-2	0.755888
6	26234963	-	H1-3	6p22.1-2											0.727273
6	26234987	-	H1-3	6p22.1-2	0.437518		0.520524	0.734952	0.579607	0.660597	0.0222357	0.672294	0.800247	0.72302	0.56594
6	26234989	-	H1-3	6p22.1-2	0.307494		0.447227	0.622642	0.592428	0.701959	0.00978725	0.636799	0.782027	0.682971	0.54596
6	26250625	-	H3C7	6p22.1-2					0.693182
6	26250635	-	H3C7	6p22.1-2	0.68616		0.81232	0.908474	0.875777	0.891509	0.00477412	0.920498	0.931163	0.919137	0.85465
6	26251614	+	H2BC9	6p22.1-2	0.698776		0.695238	0.87364					0.908293	0.881668	0.794699
6	26272931	+	H2BC10	6p22.1-2	0.76666			0.923814				0.960295	0.979839	0.955306	0.921227
6	26272934	+	H2BC10	6p22.1-2	0.710598			0.879619				0.88715	0.993976	0.902522	0.819328
6	26285321	-	H4C8	6p22.1-2			0.883117
6	26285412	-	H4C8	6p22.1-2			0.949153
6	26285499	-	H4C8	6p22.1-2											0.666667
6	26285525	-	H4C8	6p22.1-2					0.644444		0.0172414	0.52459	0.755556		0.724444
6	26285534	-	H4C8	6p22.1-2	0.633828	0.695546	0.799723	0.85694	0.793863	0.863763	0.0043377	0.831232	0.905204	0.916509	0.867908
6	26285585	-	H4C8	6p22.1-2	0.858356		0.898551	0.919601	0.92561	0.91545	0.00877193	0.917098	0.896829
6	26285592	-	H4C8	6p22.1-2	0.836364		0.847826	0.934392	0.903323	0.935484	0.0240964		0.964286
6	26285615	-	H4C8	6p22.1-2					0.962264
6	27132588	-	H2BC11	6p22.1-2			0.888889		0.876712
6	27132633	-	H2BC11	6p22.1-2			0.889764		0.911504	0.865169
6	27132638	-	H2BC11	6p22.1-2			0.85		0.900881	0.926976	0	0.910112		0.907692	0.953846
6	27132642	-	H2BC11	6p22.1-2			0.854167		0.932432	0.925926
6	27132647	-	H2BC11	6p22.1-2					0.649351
6	27132648	-	H2BC11	6p22.1-2			0.157407		0.162921	0.168142
6	27132654	-	H2BC11	6p22.1-2			0.827586		0.916667
6	27132758	-	H2BC11	6p22.1-2					0.75
6	27132760	-	H2BC11	6p22.1-2					0.786408
6	27132795	-	H2BC11	6p22.1-2	0.814372	0.843455	0.890633	0.919149	0.897354	0.930395	0.00944979	0.920264	0.950712	0.93527	0.859136
6	27133003	+	H2AC11	6p22.1-2					0.844828
6	27133038	+	H2AC11	6p22.1-2		0.769796	0.839506	0.96	0.907835	0.89399	0.00317484	0.891799	0.96048	0.874346	0.897492
6	27139282	+	H4C9	6p22.1-2	0.728588		0.766214					0.855108			0.810425
6	27139284	+	H4C9	6p22.1-2								0.739437			0.706755
6	27145973	-	H2AC12	6p22.1-2					0.8		0			0.93
6	27145997	-	H2AC12	6p22.1-2					0.811765
6	27146000	-	H2AC12	6p22.1-2					0.896226
6	27146003	-	H2AC12	6p22.1-2					0.894118
6	27146005	-	H2AC12	6p22.1-2					0.938547
6	27146029	-	H2AC12	6p22.1-2					0.767857
6	27146036	-	H2AC12	6p22.1-2					0.973052	0.973198	0.00546448		1		0.985075
6	27146043	-	H2AC12	6p22.1-2		0.84507			0.9173	0.914185	0.00186567		0.912698	0.867925	0.940594
6	27146049	-	H2AC12	6p22.1-2					0.968571
6	27146057	-	H2AC12	6p22.1-2					0.903337	0.905494	0.00380228		0.965517
6	27146062	-	H2AC12	6p22.1-2					0.976744
6	27146063	-	H2AC12	6p22.1-2					0.971429
6	27146072	-	H2AC12	6p22.1-2					0.825
6	27146073	-	H2AC12	6p22.1-2					0.890909
6	27146075	-	H2AC12	6p22.1-2		0.918033	0.90566		0.935143	0.946108	0		0.977011	0.936508
6	27146085	-	H2AC12	6p22.1-2					0.798077
6	27146852	-	H2BC12	6p22.1-2	0.753858	0.697767	0.864604	0.866735	0.841648	0.864874	0.00727531	0.87159	0.908962	0.902175	0.774898
6	27146855	-	H2BC12	6p22.1-2	0.879818	0.789442	0.884724	0.964911	0.918678	0.935107	0.0052541	0.942153	0.957161	0.942208	0.859266
6	27146884	-	H2BC12	6p22.1-2			0.793103		0.901235
6	27146904	-	H2BC12	6p22.1-2					0.872881
6	27146909	-	H2BC12	6p22.1-2			0.838235		0.837004
6	27146916	-	H2BC12	6p22.1-2			0.831858		0.880597	0.901961		0.96
6	27147106	+	H2AC12	6p22.1-2	0.659429	0.564916	0.662512	0.875814	0.819528	0.830854	0.0038774	0.842517	0.864306	0.833478	0.792685
6	27147112	+	H2AC12	6p22.1-2		0.666667	0.744681		0.825073		0.00636943	0.806452	0.912129	0.791045	0.887306
6	27147115	+	H2AC12	6p22.1-2					0.509615
6	27147126	+	H2AC12	6p22.1-2					0.192308
6	27807963	-	H2BC13	6p22.1-2					0.839286
6	27807968	-	H2BC13	6p22.1-2					0.95082
6	27807970	-	H2BC13	6p22.1-2					0.825758
6	27808003	-	H2BC13	6p22.1-2				0.870968	0.846154
6	27808115	+	H2AC13	6p22.1-2								0.945455
6	27808168	+	H2AC13	6p22.1-2					0.849057
6	27808173	+	H2AC13	6p22.1-2	0.707927	0.753732	0.874026	0.905117	0.849248	0.906994	0.00550001	0.885352	0.918828	0.939723	0.896358
6	27810052	+	H3C10	6p22.1-2		0.649123	0.618605	0.806763	0.743171		0.00560025	0.719626	0.750215	0.820388	0.721187
6	27810053	+	H3C10	6p22.1-2		0.684211	0.592593	0.456311	0.553763		0.00568182	0.565217	0.788462	0.892562	0.732322
6	27814777	-	H2AC14	6p22.1-2	0.725649	0.761669		0.882323	0.814815			0.890162	0.872727	0.938112	0.89374
6	27815016	+	H2BC14	6p22.1-2	0.45614	0.523256		0.719101				0.743489	0.745098	0.663551	0.553977
6	27815029	+	H2BC14	6p22.1-2											0.724138
6	27824092	+	H4C11	6p22.1-2		0.753086	0.840708	0.942359	0.918762		0.01	0.884058	0.968122	0.943089	0.892996
6	27824094	+	H4C11	6p22.1-2					0.865385
6	27831560	-	H4C12	6p22.1-2		0.873684	0.820755	0.930636	0.936296		0.015625	0.884058	0.947196	0.933036	0.884827
6	27837176	-	H2BC15	6p22.1-2					0.464789
6	27837492	+	H2AC15	6p22.1-2					0.881818		0.037037
6	27837521	+	H2AC15	6p22.1-2			0.78		0.810811	0.754386	0
6	27837523	+	H2AC15	6p22.1-2					0.730769
6	27837555	+	H2AC15	6p22.1-2					0.80303		0.0338983
6	27838266	-	H2AC15	6p22.1-2		0.75	0.639344		0.837638						0.857143
6	27838360	-	H2AC15	6p22.1-2					0.898305
6	27838369	-	H2AC15	6p22.1-2		0.596885	0.752988	0.855556	0.698905	0.780488	0.0138283	0.724652	0.792982	0.863014	0.676169
6	27838375	-	H2AC15	6p22.1-2	0.474576	0.586983	0.683479	0.84039	0.708826	0.791749	0.00467753	0.799686	0.796561	0.803043	0.689375
6	27838516	+	H2BC15	6p22.1-2					0.909091
6	27838518	+	H2BC15	6p22.1-2				0.970588	0.932039	0.930693
6	27838526	+	H2BC15	6p22.1-2											0.86
6	27838543	+	H2BC15	6p22.1-2		0.734694	0.857143	0.91943	0.91853	0.962264	0.0129032	0.931298	0.88764	0.883818	0.868819
6	27838544	+	H2BC15	6p22.1-2					1
6	27838545	+	H2BC15	6p22.1-2					0.884444
6	27838549	+	H2BC15	6p22.1-2		0.626087	0.828996	0.881338	0.911708	0.912162	0.0195122	0.846512	0.891347	0.798566	0.870121
6	27838551	+	H2BC15	6p22.1-2			0.741573	0.520548	0.787565		0	0.690909		0.736842	0.853659
6	27838557	+	H2BC15	6p22.1-2	0.829125	0.736579	0.865672	0.902257	0.900823	0.965537	0.00441094	0.912351	0.92624	0.872015	0.911539
6	27838569	+	H2BC15	6p22.1-2	0.605983	0.549307	0.689434	0.849878	0.819961	0.838359	0.00426857	0.789482	0.792697	0.782178	0.752086
6	27838578	+	H2BC15	6p22.1-2		0.614523	0.818182	0.895969	0.83126	0.888889	0.00790514	0.855172	0.874241	0.813896	0.734749
6	27838581	+	H2BC15	6p22.1-2					0.514286						0.564706
6	27838582	+	H2BC15	6p22.1-2		0.766667	0.614458		0.779661		0.015873	0.736842	0.708861	0.729412	0.826445
6	27838585	+	H2BC15	6p22.1-2	0.745098	0.72803	0.788462	0.82005	0.841523	0.871795	0.002	0.794549	0.883646	0.796976	0.813341
6	27838607	+	H2BC15	6p22.1-2					0.84058			0.84			0.780901
6	27865112	-	H2AC16	6p22.1-2			0.714286		0.892704				0.897196
6	27865277	+	H2AC16	6p22.1-2					0.921569	0.94958
6	27865280	+	H2AC16	6p22.1-2					0.945946	0.951613
6	27865289	+	H2AC16	6p22.1-2					0.941176	0.946429
6	27865293	+	H2AC16	6p22.1-2					0.866667
6	27867583	-	H1-5	6p22.1-2										0.013986	0.0384615
6	27867587	-	H1-5	6p22.1-2									0.853333		0.711373
6	27867588	-	H1-5	6p22.1-2	0.704246		0.823484	0.89733				0.871648	0.88739	0.847008	0.773247
6	27867591	-	H1-5	6p22.1-2									0.940476	0.961165	0.876303
6	27872346	-	H3C11	6p22.1-2	0.605753							0.845333	0.922776	0.862735	0.798543
6	27890826	-	H3C12	6p22.1-2	0.662268	0.713515	0.832723		0.741192		0.00093633	0.84641		0.931505	0.744881
6	27892762	-	H2AC17	6p22.1-2					0.875					0.921569	0.887324
6	27893181	-	H2AC17	6p22.1-2	0.173077	0.349593	0.326923	0.142872	0.703608		0	0.605263	0.78125	0.511719	0.840768
6	27893185	-	H2AC17	6p22.1-2	0.782324	0.73438	0.812227	0.939784	0.936349	0.942932	0.00623069	0.924236	0.922117	0.926266	0.898923
6	27893425	+	H2BC17	6p22.1-2	0.705851	0.73295	0.784736	0.905948	0.914261	0.932252	0.00347649	0.892354	0.861222	0.909749	0.860214
6	27893559	+	H2BC17	6p22.1-2					0.896907
6	27893575	+	H2BC17	6p22.1-2					0.905063
6	26123932	-	H2BC4	6p22.1-2					0.903846
6	26197275	-	H3C4	6p22.1-2										0.925926	0.783333
6	26199263	-	H2AC7	6p22.1-2					0.932203
6	26199285	-	H2AC7	6p22.1-2				0
6	26199514	+	H2BC7	6p22.1-2			0.711111		0.765766		0		0.80597		0.623208
6	26199556	+	H2BC7	6p22.1-2											0.815534
6	26216668	-	H2BC8	6p22.1-2				0.00588235
6	26216872	+	H2AC8	6p22.1-2			0.901961	0.948718
6	26240395	+	H4C6	6p22.1-2											0.728204
6	26240398	+	H4C6	6p22.1-2											0.157895
6	26240402	+	H4C6	6p22.1-2											0.623527
6	26285286	-	H4C8	6p22.1-2			0.924528
6	27132669	-	H2BC11	6p22.1-2					0.815789
6	27133006	+	H2AC11	6p22.1-2					0.885417
6	27139231	+	H4C9	6p22.1-2											0.928571
6	27146033	-	H2AC12	6p22.1-2					0.822034		0
6	27146064	-	H2AC12	6p22.1-2					0.926108
6	27146886	-	H2BC12	6p22.1-2			0.833333		0.791667
6	27865287	+	H2AC16	6p22.1-2					0.936306	1
1	226061831	+	H3-3A	Other histones					0.913043
1	226062696	+	H3-3A	Other histones					0.955128						1
1	226062710	+	H3-3A	Other histones	0.961667	0.923913	0.959184	0.983025	0.978723	0.984848	0.00628931	0.981928	0.982121	0.982759	0.988591
1	226062714	+	H3-3A	Other histones	0.968056	0.947059	0.954167	0.98566	0.973559	0.983583	0	0.98892	0.981717	0.985752	0.988825
1	226062721	+	H3-3A	Other histones	0.877259	0.913462	0.87737	0.969855	0.933387	0.9435	0.00149254	0.96782	0.952609	0.927536	0.943404
1	226062722	+	H3-3A	Other histones					0.71875
1	228457901	-	H2AC25	Other histones			0.892857		0.882576	0.891275	0.0103093
1	228457903	-	H2AC25	Other histones			0.821429
1	228459421	+	H2BC26	Other histones					0.933824
1	228459424	+	H2BC26	Other histones					0.919414
1	228459447	+	H2BC26	Other histones					0.907407
2	26786029	+	CENPA	Other histones				0.967033	0.957219			0.95614			0.959459
2	26786058	+	CENPA	Other histones		0.818182		0.962264	0.932353			0.964539	0.984127		0.980187
2	26786067	+	CENPA	Other histones	0.863378	0.898148	0.862385	0.962603	0.953362	0.970297	0.0384615	0.954327	0.921043	0.878049	0.934007
2	26786071	+	CENPA	Other histones		0.9		0.92381	0.928731			0.925926	0.901408	0.961165	0.979891
2	26786079	+	CENPA	Other histones		0.897436		0.934783	0.919149			0.95935		0.951613	0.990291
2	26786095	+	CENPA	Other histones				0.924528	0.91			0.901961
3	129314859	-	H1-10	Other histones					0.905405
3	129315147	+	H1-10	Other histones					0.939597
3	129316242	-	H1-10	Other histones					0.568966
3	129316247	-	H1-10	Other histones	0.808824	0.884615		0.896552	0.930693	0.942029		0.886792			0.935987
3	129316256	-	H1-10	Other histones				0.837838	0.885017	0.920354					0.848214
3	129316262	-	H1-10	Other histones					0.87069						0.901099
3	129316266	-	H1-10	Other histones					0.897727
3	129316284	-	H1-10	Other histones					0.45614
3	129316286	-	H1-10	Other histones	0.84685	0.817602	0.84878	0.935315	0.901622	0.919267	0.00944714	0.935639	0.925795	0.918553	0.913458
4	99949058	-	H2AZ1	Other histones					0.852941	0.876543
4	99949785	-	H2AZ1	Other histones					0.913793
4	99950215	-	H2AZ1	Other histones					0.392157
4	99950218	-	H2AZ1	Other histones				0.0615385	0.0684932		0.0537634
4	99950230	-	H2AZ1	Other histones	0.0327869			0.027027	0.0238095		0
4	99950235	-	H2AZ1	Other histones				0.0634921	0.0700637	0	0.0479452	0.0595238	0.0377358	0.0416667	0.100847
4	99950245	-	H2AZ1	Other histones				0.0363636	0.270718		0.0625				0.283019
4	99950248	-	H2AZ1	Other histones	0.104478	0.029743	0.030303	0.0379747	0.0428336	0.011236	0.0301091	0.0195122	0.0466777	0.0492063	0.0334518
4	99950251	-	H2AZ1	Other histones		0.135922		0.114286	0.135135	0.0576923	0.0277778	0.153846	0.0576923	0.0481928	0.139423
4	99950252	-	H2AZ1	Other histones		0.0816327			0.1		0.0833333	0.0980392	0.109589	0.0892857	0.0408163
4	99950255	-	H2AZ1	Other histones					0.206897						0.0980392
4	99950266	-	H2AZ1	Other histones					0.198718
4	99950267	-	H2AZ1	Other histones					0.194737		0.0833333		0.0491803		0.0727273
4	99950273	-	H2AZ1	Other histones	0.863588	0.875005	0.905028	0.96056	0.931542	0.889781	0.00769256	0.960824	0.963812	0.966975	0.978629
4	99950278	-	H2AZ1	Other histones	0.907725	0.881834	0.921807	0.98178	0.954496	0.919286	0.00834022	0.980666	0.962673	0.975595	0.975291
4	99950280	-	H2AZ1	Other histones		0.0582751		0.047619	0.102748	0.025974	0.0280374	0.0125	0.100687	0.0483871	0.130932
4	99950282	-	H2AZ1	Other histones					0.906706				0.761194		0.885714
4	99950289	-	H2AZ1	Other histones					0.685393
4	99950290	-	H2AZ1	Other histones					0.787402
4	99950308	-	H2AZ1	Other histones					0.930464				0.920635		0.98
4	99950315	-	H2AZ1	Other histones					0.897959				0.938144
4	99950317	-	H2AZ1	Other histones					0.905405
4	99950318	-	H2AZ1	Other histones					0.975232
4	99950322	-	H2AZ1	Other histones					0.697248
4	99950325	-	H2AZ1	Other histones					0.942568
4	99950346	-	H2AZ1	Other histones		0.708861	0.809524		0.914204	0.881356	0		0.944954		0.971771
4	99950355	-	H2AZ1	Other histones	0.841667	0.803427	0.896414	0.953347	0.897223	0.89604	0	0.967742	0.950145	0.858586	0.952572
5	135360661	-	MACROH2A1	Other histones											0.83294
5	135399224	-	MACROH2A1	Other histones					0.953846						0.882353
5	135399229	-	MACROH2A1	Other histones	0.879032	0.931818	0.927536	0.969289	0.949393	0.909091	0.0107527	0.983051	0.961816	0.951389	0.969471
5	135399238	-	MACROH2A1	Other histones					0.95
5	135399241	-	MACROH2A1	Other histones					0.863248
5	135399253	-	MACROH2A1	Other histones					0.824561
5	135399261	-	MACROH2A1	Other histones	0.917999	0.912409	0.93578	0.986365	0.959854	0.937198	0.0125	1	0.989011	0.97351	0.96786
7	44848080	-	H2AZ2	Other histones	0.942187	0.944174	0.944521	0.986585	0.971711	0.97125	0.00890869	0.974288	0.974457	0.976599	0.975607
7	44848087	-	H2AZ2	Other histones	0.864846	0.879104	0.833333	0.973032	0.937436	0.948649	0.0105884	0.94961	0.948625	0.955462	0.938643
7	44848095	-	H2AZ2	Other histones					0.924051				0.802632	0.882353	0.786517
7	44848106	-	H2AZ2	Other histones	0.941351	0.947699	0.932203	0.990362	0.955119	0.99115	0	0.991304	0.976735	0.969388	0.971127
7	44848113	-	H2AZ2	Other histones	0.949153	0.883721	0.87037	0.975904	0.928571			0.956522	0.956436	0.945783	0.959912
7	44848121	-	H2AZ2	Other histones					0.968				0.936508	1	0.98125
10	70052532	+	MACROH2A2	Other histones					0.926316
10	70052832	+	MACROH2A2	Other histones		0.920635		0.956928	0.927122	0.953846	0.00985222	1
10	70052835	+	MACROH2A2	Other histones				0.909091	0.936232
10	70052846	+	MACROH2A2	Other histones		0.923512		0.966942	0.943769	0.948207	0.026455	0.981366	0.958289
10	70052850	+	MACROH2A2	Other histones					0.781818
10	70052851	+	MACROH2A2	Other histones					0.816092
10	70052867	+	MACROH2A2	Other histones					0.907392		0.0136986
10	70091180	+	MACROH2A2	Other histones				0.956662					0.959677
11	119095435	-	H2AX	Other histones				0.0625
11	119095456	-	H2AX	Other histones				0.0491803
11	119095458	-	H2AX	Other histones	0.526316	0.641791		0.478723	0.821818	0.704545	0	0.862069	0.845098	0.794393	0.881004
11	119095462	-	H2AX	Other histones	0.770816	0.746696	0.764463	0.748167	0.862407	0.858802	0.011943	0.908261	0.886844	0.85474	0.934512
11	119095465	-	H2AX	Other histones	0.907708	0.904293	0.885382	0.972684	0.932506	0.945538	0.00607617	0.959505	0.957662	0.966142	0.96213
11	119095467	-	H2AX	Other histones	0.776278	0.681057	0.720952	0.919068	0.835804	0.851681	0.00597578	0.903779	0.876069	0.857407	0.907792
12	14771129	-	H4C16	Other histones	0.797619	0.766166		0.869656	0.840833	0.891242	0.00262055	0.850481	0.87174	0.833677	0.902586
12	14771131	-	H4C16	Other histones	0.784427	0.693114		0.899001	0.892386	0.914451	0.00390607	0.874851	0.861104	0.892328	0.885815
12	14771158	-	H4C16	Other histones					0.962264
12	14774336	+	H2AJ	Other histones	0.932773				0.942623			0.992248	0.984127	0.974227
12	14774369	+	H2AJ	Other histones	0.856462	0.842414		0.932889	0.900129	0.914538	0.00187266	0.953905	0.942683	0.950786
12	14774371	+	H2AJ	Other histones	0.847196			0.934783	0.925287	0.901408	0	0.944238	0.924528	0.917647
12	14774373	+	H2AJ	Other histones	0.867577			0.95943	0.945455	0.950617		0.966038	0.952213	0.919283
12	14774380	+	H2AJ	Other histones	0.946432	0.961538		0.972687	0.961165	0.970149		0.963822	0.984434	0.978723
12	14774386	+	H2AJ	Other histones	0.899451			0.925926	0.951613			0.902439	0.987342	0.959459
12	14774400	+	H2AJ	Other histones	0.858093			0.967213	0.944			0.904977	0.984127	0.932432
12	14774407	+	H2AJ	Other histones	0.852574	0.831395		0.946082	0.93012	0.93007	0.0104167	0.957074	0.923073	0.921258
12	14774450	+	H2AJ	Other histones										0.955882
17	75779773	-	H3-3B	Other histones	0.901679	0.912388	0.903101	0.936271	0.958115	0.947159	0.00460304	0.956822	0.965518	0.929339	0.969568
17	75779778	-	H3-3B	Other histones	0.925305	0.853351	0.842096	0.974622	0.95997	0.965824	0.00593586	0.96987	0.939208	0.96527	0.954705
21	43565182	+	H2BC12L	Other histones			0.848039		0.947368				0.944949	0.95082	0.758621
1	226062493	-	H3-3A	Other histones					0.828571
1	226062495	-	H3-3A	Other histones					0.906103
1	226062698	+	H3-3A	Other histones					0.955882
1	228457899	-	H2AC25	Other histones					0.82
10	70052587	+	MACROH2A2	Other histones					0.913978
10	70052636	+	MACROH2A2	Other histones		0.941176		0.971154	0.949324	0.935484
10	70052800	+	MACROH2A2	Other histones					0.808824
10	70052848	+	MACROH2A2	Other histones					0.921875
10	70052873	+	MACROH2A2	Other histones					0.952381
10	70052877	+	MACROH2A2	Other histones					0.92
10	70052879	+	MACROH2A2	Other histones					0.857143
10	70091235	+	MACROH2A2	Other histones									0.891566
10	70093637	+	MACROH2A2	Other histones											0.987654
12	14774347	+	H2AJ	Other histones	0.769231				0.867925
4	99950305	-	H2AZ1	Other histones					0.93578
4	99950340	-	H2AZ1	Other histones					0.952991						1
4	99950343	-	H2AZ1	Other histones					0.93154
4	99950359	-	H2AZ1	Other histones					0.965066
5	135360632	-	MACROH2A1	Other histones											0.928571
5	135360634	-	MACROH2A1	Other histones											0.934426
5	135399887	-	MACROH2A1	Other histones					0.9		0.00694444
5	135399890	-	MACROH2A1	Other histones					0.983051
5	135399914	-	MACROH2A1	Other histones					0.932203
5	135399921	-	MACROH2A1	Other histones					0.962264
