# Supplementary material for: Decoding m6Am by simultaneous transcription-start mapping and methylation quantification
Source: eLife. 2025 Mar 31;13:RP104139. doi: 10.7554/eLife.104139 (PMC11957539; doi:10.7554/eLife.104139)
Supplement: Figure 5—source data 1. [file elife-104139-fig5-data1.xlsx]

## Sheet: Legend
Figure 5 - Source Data 1. Comparing A-transcription-start nucleotide expression between wild-type and PCIF1 knockout cells.
Sheet 1. DESeq results of A-TSN expression changes between WT and PCIF1 KO HEK293T cells (by m6Am levels)
Sheet 2. DESeq results of A-TSN expression changes between WT and PCIF1 KO HEK293T cells (by TSS motifs)
Sheet 3. DESeq results of A-TSN expression changes between WT and PCIF1 KO A549 cells (by m6Am levels)
Sheet 4. DESeq results of A-TSN expression changes between WT and PCIF1 KO A549 cells (by TSS motifs)

## Sheet: HEK293T_m6Am_bins
Chr	Position (hg38, 1-based)	Strand	baseMean	log2FoldChange	m6Am level (HEK293T)	m6Am level bin	Gene
1	959258	-	109.876	-0.18415	0.976091	80-100th	NOC2L		Statistics for m6Am level (HEK293T)
1	959268	-	102.718	-0.432796	0.952826	60-80th	NOC2L			Count	Mean	Std	Min	25-percentile	Median	75-percentile	Max
1	1000123	-	299.771	0.244241	0.965967	80-100th	HES4		Bin
1	1231972	-	191.14	0.2011	0.717489	0-20th	SDF4		0-20th	1326	0.772198	0.127479	0.00917431	0.73897	0.81973	0.856921	0.875912
1	1231981	-	336.071	0.346433	0.93835	40-60th	SDF4		20-40th	2272	0.904746	0.0122591	0.875918	0.895649	0.90707	0.915326	0.921466
1	1231983	-	174.6	0.212213	0.873531	0-20th	SDF4		40-60th	3218	0.934408	0.00672112	0.92147	0.928738	0.934875	0.940236	0.944954
1	1231984	-	168.189	1.27302	0.634865	0-20th	SDF4		60-80th	3813	0.954903	0.00557896	0.944972	0.95012	0.954908	0.959677	0.964722
1	1273833	-	237.08	-0.05516	0.985658	80-100th	UBE2J2		80-100th	3369	0.975606	0.00777943	0.964727	0.969011	0.974389	0.98088	1
1	1308597	+	249.399	-0.0991518	0.938127	40-60th	PUSL1
1	1308644	+	135.94	-0.212893	0.931395	40-60th	PUSL1		Student's t-test
1	1324653	-	211.255	0.0218366	0.99345	80-100th	INTS11					P-value
1	1324658	-	148.301	0.00381054	0.958333	60-80th	INTS11		0-20th	vs	20-40th	0.00138718
1	1375171	-	320.81	0.164224	0.95094	60-80th	AURKAIP1		0-20th	vs	40-60th	1.42154e-06
1	1375180	-	144.413	-0.295654	0.99236	80-100th	AURKAIP1		0-20th	vs	60-80th	3.09365e-14
1	1375199	-	104.595	0.0761184	0.951797	60-80th	AURKAIP1		0-20th	vs	80-100th	2.14545e-39
1	1375200	-	176.044	0.311226	0.945491	60-80th	AURKAIP1		20-40th	vs	40-60th	0.109551
1	1399335	-	139.518	0.151046	0.984813	80-100th	CCNL2		20-40th	vs	60-80th	3.8182e-07
1	1399336	-	143.822	0.643495	0.953143	60-80th	CCNL2		20-40th	vs	80-100th	2.17056e-34
1	1407278	-	334.517	0.215026	0.911315	20-40th	MRPL20		40-60th	vs	60-80th	9.08126e-05
1	1407293	-	1767.95	-0.160738	0.955537	60-80th	MRPL20		40-60th	vs	80-100th	1.81617e-33
1	1407296	-	228.11	-0.234877	0.984828	80-100th	MRPL20		60-80th	vs	80-100th	1.35027e-17
1	1407299	-	450.998	-0.356445	0.987675	80-100th	MRPL20
1	1471778	+	133.889	0.553682	0.951505	60-80th	ATAD3B
1	1512162	+	232.864	0.306415	0.915735	20-40th	ATAD3A
1	1574631	-	102.783	0.019713	0.928416	40-60th	SSU72
1	1891070	-	700.79	0.512369	0.972578	80-100th	GNB1
1	1891087	-	653.507	0.560918	0.783439	0-20th	GNB1
1	2194772	-	552.081	0.462513	0.97772	80-100th	FAAP20
1	2391554	-	189.351	0.779172	0.789869	0-20th	MORN1
1	2391841	+	409.026	0.228955	0.965842	80-100th	RER1
1	2391842	+	969.689	0.0965004	0.972569	80-100th	RER1
1	2391854	+	137.485	-0.338543	0.979508	80-100th	RER1
1	2526596	-	542.895	-0.254624	0.944162	40-60th	PANK4
1	3796491	-	135.079	-0.254744	0.982724	80-100th	LRRC47
1	3857211	-	123.943	-0.0746775	0.970964	80-100th	CEP104
1	3900258	-	270.326	-0.0574222	0.982885	80-100th	C1orf174
1	6199588	-	653.22	-0.248822	0.961295	60-80th	RPL22
1	6199609	-	349.384	-0.721592	0.97572	80-100th	RPL22
1	6235929	-	189.458	-0.407407	0.867925	0-20th	ICMT
1	6235988	-	120.358	0.18305	0.957895	60-80th	ICMT
1	6393377	-	628.488	-0.61845	0.945242	60-80th	ACOT7
1	6393381	-	175.652	-0.50672	0.931138	40-60th	ACOT7
1	6393767	-	169.284	0.250301	0.959953	60-80th	ACOT7
1	6554533	-	185.943	0.221452	0.927711	40-60th	NOL9
1	6554535	-	696.833	0.133477	0.972921	80-100th	NOL9
1	6625186	+	106.007	-0.0814535	0.966013	80-100th	THAP3
1	6701813	-	127.664	0.211355	0.893204	20-40th	DNAJC11
1	7771301	+	129.732	-0.288743	0.968531	80-100th	VAMP3
1	7771305	+	635.328	-0.527845	0.962935	60-80th	VAMP3
1	7961665	+	721.148	-0.386207	0.958643	60-80th	PARK7
1	7961677	+	164.787	-0.278227	0.633943	0-20th	PARK7
1	7961681	+	336.044	-0.601975	0.798555	0-20th	PARK7
1	7961717	+	2331.04	-0.165975	0.96473	80-100th	PARK7
1	7961723	+	137.577	-0.87005	0.920732	20-40th	PARK7
1	8817640	-	147.063	0.155288	0.95082	60-80th	RERE
1	8878660	-	175.673	-0.462022	0.867116	0-20th	ENO1
1	8878664	-	100.948	-0.109359	0.869324	0-20th	ENO1
1	8878644	-	745.595	-0.688906	0.928673	40-60th	ENO1
1	8878683	-	5243.55	-0.311419	0.978157	80-100th	ENO1
1	8878686	-	55158.9	-0.129787	0.9545	60-80th	ENO1
1	8878688	-	6045.78	-0.103553	0.950045	60-80th	ENO1
1	8878708	-	120.296	-0.765543	0.887078	20-40th	ENO1
1	8878709	-	795.621	-0.220972	0.883555	20-40th	ENO1
1	8878712	-	941.145	-0.78368	0.958484	60-80th	ENO1
1	8878716	-	144.717	-0.971452	0.982384	80-100th	ENO1
1	8878720	-	327.003	-0.71831	0.978234	80-100th	ENO1
1	9539489	+	367.254	0.437156	0.95138	60-80th	SLC25A33
1	9823960	-	570.482	0.0325456	0.936	40-60th	CLSTN1
1	9823965	-	1492.25	0.7353	0.967278	80-100th	CLSTN1
1	9943359	-	651.724	-0.224288	0.906744	20-40th	LZIC
1	9943327	-	113.552	0.551803	0.968121	80-100th	LZIC
1	9943488	+	122.571	0.441341	0.931818	40-60th	NMNAT1
1	10032965	+	102.054	0.754473	0.933824	40-60th	UBE4B
1	10033213	+	167.593	-0.543145	0.930836	40-60th	UBE4B
1	10210570	+	176.666	0.06236	0.932155	40-60th	KIF1B
1	10399034	+	468.808	0.0770187	0.97786	80-100th	PGD
1	10399069	+	1493.1	-0.486785	0.965804	80-100th	PGD
1	10472477	-	112.735	-0.485859	0.966887	80-100th	DFFA
1	10472494	-	233.01	-0.358172	0.951009	60-80th	DFFA
1	10472522	-	306.438	-0.216831	0.970556	80-100th	DFFA
1	10474950	+	200.505	-0.189045	0.966302	80-100th	PEX14
1	10474954	+	281.166	-0.336917	0.956069	60-80th	PEX14
1	10474961	+	494.508	0.0163265	0.966958	80-100th	PEX14
1	10474963	+	169.654	0.61474	0.962963	60-80th	PEX14
1	11012654	+	3472.96	0.0311473	0.952037	60-80th	TARDBP
1	11060044	-	160.433	-0.476844	0.959375	60-80th	SRM
1	11099842	-	194.618	-0.179947	0.960849	60-80th	EXOSC10
1	11099855	-	111.19	0.0759876	0.967587	80-100th	EXOSC10
1	11273497	+	870.974	0.595279	0.908419	20-40th	UBIAD1
1	11273503	+	115.007	0.69881	0.938053	40-60th	UBIAD1
1	11273510	+	525.233	0.160065	0.929104	40-60th	UBIAD1
1	11736136	+	520.972	0.0777798	0.965389	80-100th	AGTRAP
1	11934723	+	122.06	0.0434062	0.950637	60-80th	PLOD1
1	11980446	+	731.965	-0.273932	0.926966	40-60th	MFN2
1	13583804	+	103.472	0.467648	0.945066	60-80th	PDPN
1	13583832	+	669.533	0.525226	0.934155	40-60th	PDPN
1	15524215	-	139.842	-0.304997	0.922156	40-60th	CASP9
1	15617458	+	321.989	0.168448	0.94876	60-80th	DDI2
1	15807696	-	430.288	0.35715	0.972103	80-100th	UQCRHL
1	15847859	+	565.11	-0.294042	0.913899	20-40th	SPEN
1	15847886	+	386.157	0.185998	0.957143	60-80th	SPEN
1	16367243	+	1188.14	-0.0826382	0.955	60-80th	SZRD1
1	17011928	-	351.905	0.0304449	0.966216	80-100th	ATP13A2
1	17054022	-	104.738	0.887575	0.791398	0-20th	SDHB
1	17054029	-	825.831	-0.500118	0.9273	40-60th	SDHB
1	17439669	-	409.713	1.09918	0.84918	0-20th	RCC2
1	17439671	-	3727.51	0.664724	0.88877	20-40th	RCC2
1	17439675	-	266.682	0.710216	0.877193	20-40th	RCC2
1	17438554	-	180.81	-0.340987	0.926724	40-60th	RCC2
1	17438565	-	190.204	-0.347661	0.974978	80-100th	RCC2
1	17439664	-	163.443	0.286315	0.904328	20-40th	RCC2
1	17439721	-	250.133	0.477137	0.852263	0-20th	RCC2
1	19210261	-	223.097	0.0527015	0.931624	40-60th	UBR4
1	19210264	-	124.617	0.0629982	0.953488	60-80th	UBR4
1	19251522	-	520.166	-0.048742	0.923427	40-60th	EMC1
1	19251795	+	334.978	0.152217	0.973333	80-100th	MRTO4
1	19251805	+	923.172	0.0202126	0.961048	60-80th	MRTO4
1	19251820	+	572.439	-0.171966	0.913264	20-40th	MRTO4
1	19251826	+	112.258	-0.165833	0.950272	60-80th	MRTO4
1	19312101	-	123.57	-0.47176	0.965812	80-100th	AKR7A2
1	19312326	+	222.403	-0.142475	0.972161	80-100th	SLC66A1
1	19485477	-	123.564	-0.781499	0.949686	60-80th	CAPZB
1	19596984	+	113.258	-0.153646	0.96129	60-80th	MICOS10
1	19596990	+	532.665	-0.203655	0.965517	80-100th	MICOS10
1	19597018	+	166.477	-0.626008	0.837956	0-20th	MICOS10
1	19597021	+	370.125	-0.260634	0.966338	80-100th	MICOS10
1	19597029	+	220.334	-0.938771	0.954306	60-80th	MICOS10
1	20508129	-	121.098	0.290045	0.924623	40-60th	MUL1
1	20661403	-	177.045	0.0294688	0.974855	80-100th	DDOST
1	20661450	-	190.948	-0.189085	0.975	80-100th	DDOST
1	20786663	-	291.958	0.381335	0.901278	20-40th	HP1BP3
1	20786666	-	1462.73	0.19576	0.962086	60-80th	HP1BP3
1	20786652	-	274.105	-0.390866	0.899851	20-40th	HP1BP3
1	20787307	-	213.106	-0.0870239	0.970252	80-100th	HP1BP3
1	21176859	-	236.11	0.222258	0.910172	20-40th	EIF4G3
1	21176867	-	104.273	0.128923	0.895652	20-40th	EIF4G3
1	21176883	-	135.412	-0.244671	0.914967	20-40th	EIF4G3
1	21176897	-	274.372	-0.458981	0.933915	40-60th	EIF4G3
1	21176909	-	107.79	0.133808	0.962963	60-80th	EIF4G3
1	21783091	-	210.512	0.675476	0.943226	40-60th	USP48
1	21783096	-	184.099	0.307819	0.949882	60-80th	USP48
1	22025505	+	147.174	-0.466927	0.960583	60-80th	ENSG00000289694
1	22052671	+	471.867	-0.187932	0.970284	80-100th	CDC42
1	22052692	+	588.466	-0.203162	0.970016	80-100th	CDC42
1	22052700	+	136.888	-0.430895	0.864583	0-20th	CDC42
1	22052711	+	7251.85	-0.192971	0.928966	40-60th	CDC42
1	22052720	+	1611.85	0.112972	0.958948	60-80th	CDC42
1	22451858	+	166.531	0.233076	0.897281	20-40th	ZBTB40
1	23168817	-	189.575	-0.13667	0.967213	80-100th	LUZP1
1	23344265	-	212.051	0.256921	0.787778	0-20th	HNRNPR
1	23344275	-	213.265	0.560543	0.950719	60-80th	HNRNPR
1	23344281	-	1000.02	0.632287	0.910863	20-40th	HNRNPR
1	23344300	-	164.251	0.274742	0.943038	40-60th	HNRNPR
1	23344356	-	164.734	0.376871	0.953431	60-80th	HNRNPR
1	23531233	-	188.993	0.751591	0.471698	0-20th	E2F2
1	23559529	-	312.408	0.407548	0.918848	20-40th	ID3
1	23691794	+	220.701	0.474236	0.947402	60-80th	RPL11
1	23691795	+	160.083	-0.498955	0.979871	80-100th	RPL11
1	23743471	+	935.051	-0.111261	0.91913	20-40th	ELOA
1	23743494	+	196.701	0.228037	0.913208	20-40th	ELOA
1	23778418	+	1450.51	0.134774	0.910773	20-40th	PITHD1
1	23791185	+	159.299	-0.100134	0.906667	20-40th	LYPLA2
1	23825428	-	107.847	0.21743	0.966989	80-100th	HMGCL
1	23868290	-	139.377	-0.71561	0.974194	80-100th	FUCA1
1	23980284	-	566.066	-0.591813	0.951282	60-80th	SRSF10
1	23980341	-	216.816	-0.23621	0.968329	80-100th	SRSF10
1	23980351	-	330.558	-0.0190159	0.960171	60-80th	SRSF10
1	23980354	-	814.474	0.151479	0.977702	80-100th	SRSF10
1	23980369	-	316.132	0.464017	0.943506	40-60th	SRSF10
1	23980370	-	559.731	0.103051	0.934976	40-60th	SRSF10
1	23980372	-	190.636	0.134997	0.882404	20-40th	SRSF10
1	24643296	+	281.484	-0.0846196	0.96875	80-100th	SRRM1
1	24643298	+	1034.43	-0.258786	0.933962	40-60th	SRRM1
1	24643302	+	1610.42	0.201845	0.966954	80-100th	SRRM1
1	24643306	+	628.904	0.014899	0.965909	80-100th	SRRM1
1	24745382	+	199.577	-0.623847	0.924051	40-60th	CLIC4
1	24745432	+	166.296	-0.272674	0.983333	80-100th	CLIC4
1	24745445	+	183.423	-0.44458	0.927342	40-60th	CLIC4
1	24745447	+	2430.25	-0.310298	0.936937	40-60th	CLIC4
1	25232479	-	112.091	0.286972	0.896046	20-40th	SYF2
1	25232483	-	120.29	0.0671914	0.779398	0-20th	SYF2
1	25232484	-	139.902	0.0367732	0.566922	0-20th	SYF2
1	25232504	-	303.55	-0.263304	0.94958	60-80th	SYF2
1	25247454	-	2154.43	-0.122086	0.894369	20-40th	RSRP1
1	25338308	+	929.474	0.172708	0.937296	40-60th	TMEM50A
1	25338329	+	309.999	0.263128	0.951837	60-80th	TMEM50A
1	25338334	+	2011.28	-0.379427	0.971013	80-100th	TMEM50A
1	25430894	+	115.757	0.9965	0.923977	40-60th	MACO1
1	25430900	+	200.17	0.612575	0.938931	40-60th	MACO1
1	25906419	-	22145.6	-0.57567	0.968635	80-100th	STMN1
1	25906417	-	179.66	-0.48356	0.810952	0-20th	STMN1
1	25998063	-	114.819	-0.127307	0.949939	60-80th	PAFAH2
1	26169927	+	419.836	-0.287697	0.953909	60-80th	ZNF593
1	26234214	+	111.138	-0.547845	0.927757	40-60th	CEP85
1	26280099	+	245.74	-1.26758	0.962756	60-80th	SH3BGRL3
1	26306635	-	116.635	-0.311294	0.972678	80-100th	UBXN11
1	26472420	+	141.028	0.718848	0.930972	40-60th	HMGN2
1	26472441	+	109.576	0.844171	0.92132	20-40th	HMGN2
1	26472471	+	104.803	-0.0077563	0.964515	60-80th	HMGN2
1	26472477	+	302.817	0.748016	0.956973	60-80th	HMGN2
1	26472479	+	246.907	0.665753	0.929436	40-60th	HMGN2
1	26472488	+	557.2	-0.417776	0.965912	80-100th	HMGN2
1	26472507	+	589.568	-0.979519	0.883117	20-40th	HMGN2
1	26472510	+	773.606	-0.762336	0.924528	40-60th	HMGN2
1	26472548	+	219.608	-0.500672	0.631579	0-20th	HMGN2
1	26890274	-	1041.96	-0.223157	0.907347	20-40th	GPN2
1	26890283	-	433.584	-0.0312981	0.924969	40-60th	GPN2
1	26900457	-	115.585	-0.0240412	0.900641	20-40th	GPATCH3
1	26921747	+	144.846	0.494272	0.863777	0-20th	NUDC
1	26921748	+	204.46	-0.154253	0.964912	80-100th	NUDC
1	26921757	+	138.247	-0.100799	0.964151	60-80th	NUDC
1	26921760	+	319.834	0.238764	0.961165	60-80th	NUDC
1	26921787	+	452.801	-0.14569	0.94964	60-80th	NUDC
1	27155125	-	201.815	0.0442302	0.877395	20-40th	SLC9A1
1	27322266	+	121.691	-0.161535	0.925117	40-60th	TMEM222
1	27490053	-	112.535	-0.150289	0.925	40-60th	WASF2
1	27830787	+	211.909	-0.264205	0.970149	80-100th	PPP1R8
1	27830814	+	3395.46	0.0817086	0.948944	60-80th	PPP1R8
1	27914535	-	127.55	-0.263378	0.741214	0-20th	RPA2
1	27914539	-	154.025	-0.275363	0.880911	20-40th	RPA2
1	27914545	-	275.357	0.0826496	0.897597	20-40th	RPA2
1	27914547	-	308.301	-0.174398	0.872031	0-20th	RPA2
1	27914549	-	1203.57	-0.0586651	0.46847	0-20th	RPA2
1	27914575	-	814.296	-0.0983421	0.905642	20-40th	RPA2
1	27914743	-	161.573	0.344299	0.906606	20-40th	RPA2
1	27935029	+	105.652	-0.20116	0.967724	80-100th	SMPDL3B
1	28088610	-	561.944	0.927942	0.961923	60-80th	EYA3
1	28088615	-	100.817	0.154125	0.947137	60-80th	EYA3
1	28088624	-	171.451	-0.233707	0.971279	80-100th	EYA3
1	28088634	-	117.881	-0.0965785	0.986667	80-100th	EYA3
1	28233020	-	482.612	-0.213889	0.958865	60-80th	DNAJC8
1	28233026	-	420.339	-0.309187	0.907558	20-40th	DNAJC8
1	28233029	-	1037.16	-0.338743	0.975153	80-100th	DNAJC8
1	28233056	-	101.15	-0.148143	0.947413	60-80th	DNAJC8
1	28236095	+	122.768	0.00362159	0.985294	80-100th	ATP5IF1
1	28236121	+	2656.54	-0.29262	0.972845	80-100th	ATP5IF1
1	28236124	+	1232.83	-0.948321	0.984255	80-100th	ATP5IF1
1	28236131	+	925.738	0.0856481	0.973254	80-100th	ATP5IF1
1	28236132	+	390.864	-0.25815	0.96271	60-80th	ATP5IF1
1	28236135	+	202.912	0.266119	0.780011	0-20th	ATP5IF1
1	28236137	+	154	0.274946	0.917376	20-40th	ATP5IF1
1	28236154	+	8645.54	-0.358618	0.977503	80-100th	ATP5IF1
1	28236163	+	2366.99	-0.30435	0.973082	80-100th	ATP5IF1
1	28236171	+	218.309	-0.306173	0.95527	60-80th	ATP5IF1
1	28236183	+	108.619	0.330984	0.837575	0-20th	ATP5IF1
1	28259504	+	131.883	-0.0496523	0.944369	40-60th	SESN2
1	28259524	+	412.01	-0.319638	0.89703	20-40th	SESN2
1	28369771	+	102.415	-0.224821	0.989362	80-100th	PHACTR4
1	28505984	+	104.53	0.409742	0.915138	20-40th	RCC1
1	28506113	+	104.208	-0.249889	0.975	80-100th	RCC1
1	28518226	+	375.04	-0.0562787	0.965054	80-100th	RCC1
1	28518236	+	292.14	0.0573341	0.821622	0-20th	RCC1
1	28518255	+	1615.18	0.105729	0.946387	60-80th	RCC1
1	28518282	+	259.752	0.0134931	0.945402	60-80th	RCC1
1	28553087	+	449.674	0.340409	0.937768	40-60th	TRNAU1AP
1	28643029	-	220.038	0.210648	0.952919	60-80th	TAF12
1	28643067	-	214.207	-0.463334	0.951752	60-80th	TAF12
1	28643085	-	267.16	-0.0560987	0.963843	60-80th	TAF12
1	28736940	+	1040.81	-0.10325	0.941248	40-60th	YTHDF2
1	28736942	+	128.992	1.17415	0.966102	80-100th	YTHDF2
1	28887103	+	115.468	-0.548881	0.939073	40-60th	EPB41
1	28914569	+	342.25	0.462874	0.987342	80-100th	EPB41
1	29236522	+	186.563	0.0725689	0.977401	80-100th	PTPRU
1	31065717	-	616.766	-0.331988	0.910746	20-40th	PUM1
1	31065667	-	300.554	-0.133771	0.833333	0-20th	PUM1
1	31296764	-	706.659	-0.388386	0.951381	60-80th	SNRNP40
1	31296766	-	438.699	-0.159232	0.964241	60-80th	SNRNP40
1	31296782	-	353.707	0.0417035	0.904716	20-40th	SNRNP40
1	31296791	-	118.464	-0.0265412	0.782961	0-20th	SNRNP40
1	31296815	-	340.295	0.446175	0.952769	60-80th	SNRNP40
1	31296818	-	268.794	0.174439	0.981848	80-100th	SNRNP40
1	31296819	-	154.346	0.78639	0.984091	80-100th	SNRNP40
1	31297006	+	134.574	0.363531	0.940924	40-60th	ZCCHC17
1	31297036	+	323.8	-0.3772	0.931431	40-60th	ZCCHC17
1	31297041	+	169.248	-0.891454	0.980929	80-100th	ZCCHC17
1	31644873	-	4064.26	-0.223329	0.984739	80-100th	PEF1
1	31644867	-	212.858	-0.331695	0.972752	80-100th	PEF1
1	31644870	-	172.591	-0.59963	0.961698	60-80th	PEF1
1	31644878	-	279.962	-0.400941	0.966807	80-100th	PEF1
1	31644896	-	299.217	-0.455073	0.965819	80-100th	PEF1
1	31938354	-	243.709	-0.237772	0.975236	80-100th	PTP4A2
1	32013854	+	1201.02	0.142088	0.968111	80-100th	KHDRBS1
1	32072966	+	127.18	-0.650349	0.956818	60-80th	TMEM39B
1	32108045	+	166.182	-0.165741	0.920725	20-40th	KPNA6
1	32108047	+	130.237	-0.695762	0.944271	40-60th	KPNA6
1	32108056	+	998.829	-0.150711	0.966103	80-100th	KPNA6
1	32108058	+	115.096	-0.0315185	0.859043	0-20th	KPNA6
1	32108065	+	132.582	0.068864	0.921687	40-60th	KPNA6
1	32108108	+	118.96	-0.270099	0.951049	60-80th	KPNA6
1	32179675	+	225.434	0.0475189	0.950442	60-80th	TXLNA
1	32179712	+	259.706	0.502238	0.978641	80-100th	TXLNA
1	32179715	+	454.778	0.669662	0.957045	60-80th	TXLNA
1	32179719	+	150	0.370178	0.928571	40-60th	TXLNA
1	32179743	+	1260.59	0.0160008	0.966719	80-100th	TXLNA
1	32179745	+	190.224	-0.146587	0.935937	40-60th	TXLNA
1	32179758	+	182.663	0.295919	0.946108	60-80th	TXLNA
1	32205671	+	246.661	0.0184737	0.902266	20-40th	IQCC
1	32222390	+	192.102	-0.112015	0.976789	80-100th	EIF3I
1	32222392	+	311.096	-0.311984	0.980769	80-100th	EIF3I
1	32222407	+	16167.8	-0.262157	0.988844	80-100th	EIF3I
1	32222411	+	2028.18	0.239067	0.954408	60-80th	EIF3I
1	32222433	+	2433.38	-0.545625	0.927961	40-60th	EIF3I
1	32292126	+	310.714	-0.268172	0.933333	40-60th	HDAC1
1	32292150	+	233.323	-0.342072	0.926829	40-60th	HDAC1
1	32336230	-	1113.89	0.29492	0.935684	40-60th	MARCKSL1
1	32394425	-	294.267	-0.122786	0.910891	20-40th	BSDC1
1	32394430	-	201.161	-0.0598999	0.891089	20-40th	BSDC1
1	32394441	-	547.781	-0.0506932	0.969253	80-100th	BSDC1
1	32539430	+	128.579	0.760817	0.95	60-80th	ZBTB8A
1	32651187	+	196.253	0.255021	0.671233	0-20th	RBBP4
1	32651207	+	241.373	0.116998	0.877602	20-40th	RBBP4
1	32651210	+	1856.19	0.208749	0.965748	80-100th	RBBP4
1	32651211	+	259.637	0.242231	0.937788	40-60th	RBBP4
1	32651212	+	409.115	0.134915	0.942574	40-60th	RBBP4
1	32651214	+	1718.83	0.268046	0.872727	0-20th	RBBP4
1	32651215	+	193.76	0.112068	0.7625	0-20th	RBBP4
1	32651217	+	497.533	-0.44504	0.926923	40-60th	RBBP4
1	32651230	+	160.782	0.0993186	0.857843	0-20th	RBBP4
1	32651232	+	487.179	-0.170932	0.979245	80-100th	RBBP4
1	32651267	+	135.767	-0.880406	0.936709	40-60th	RBBP4
1	32651280	+	883.632	-0.469598	0.960713	60-80th	RBBP4
1	32651283	+	313.851	-0.678346	0.947146	60-80th	RBBP4
1	32817317	-	149.432	0.0496533	0.921986	40-60th	YARS1
1	32817327	-	484.184	0.17075	0.917827	20-40th	YARS1
1	32817329	-	400.179	0.78417	0.910294	20-40th	YARS1
1	32817338	-	112.234	0.00678197	0.920443	20-40th	YARS1
1	32817349	-	432.415	0.654048	0.957157	60-80th	YARS1
1	32817358	-	924.432	-0.135797	0.961853	60-80th	YARS1
1	32817414	-	752.573	-0.221648	0.912917	20-40th	YARS1
1	33036848	-	1192.91	-0.933273	0.95359	60-80th	AK2
1	33036879	-	1058.28	-0.085149	0.911949	20-40th	AK2
1	33036882	-	530.682	-0.500502	0.977475	80-100th	AK2
1	33036883	-	855.179	0.226189	0.932254	40-60th	AK2
1	33349897	-	356.061	0.759388	0.915789	20-40th	PHC2
1	33349908	-	123.656	0.174773	0.984252	80-100th	PHC2
1	34985330	-	114.575	0.292533	0.959538	60-80th	ENSG00000284773
1	35193129	-	249.677	-0.180242	0.770606	0-20th	SFPQ
1	35193136	-	190.042	0.0824374	0.811538	0-20th	SFPQ
1	35557799	+	210.026	-0.0830439	0.93311	40-60th	NCDN
1	35641526	-	3099.69	0.459052	0.941855	40-60th	PSMB2
1	35641525	-	164.53	0.0313052	0.943077	40-60th	PSMB2
1	35641538	-	1369.28	-0.00245898	0.906643	20-40th	PSMB2
1	35641501	-	109.242	-0.724972	0.927083	40-60th	PSMB2
1	35641550	-	135.872	0.17867	0.929167	40-60th	PSMB2
1	35769964	-	700.019	0.426738	0.914972	20-40th	CLSPN
1	35769967	-	857.345	0.0308552	0.982414	80-100th	CLSPN
1	35769969	-	138.256	0.339137	0.904523	20-40th	CLSPN
1	35769970	-	220.759	0.304384	0.979651	80-100th	CLSPN
1	35769978	-	642.08	0.396367	0.965271	80-100th	CLSPN
1	35769994	-	118.18	-0.25937	0.944444	40-60th	CLSPN
1	35883233	+	172.895	0.300521	0.915909	20-40th	AGO1
1	36149486	-	384.71	-0.140576	0.960972	60-80th	TRAPPC3
1	36149490	-	158.86	-0.116672	0.966387	80-100th	TRAPPC3
1	36224448	+	206.089	0.0257788	0.749417	0-20th	THRAP3
1	36385924	-	225.991	0.488687	0.938068	40-60th	STK40
1	36397888	-	276.514	-0.541653	0.966316	80-100th	LSM10
1	36397906	-	199.394	-0.454614	0.944402	40-60th	LSM10
1	36397914	-	188.149	0.618251	0.920573	20-40th	LSM10
1	36464278	-	103.537	-0.237452	0.977379	80-100th	MRPS15
1	36464285	-	129.168	-0.546312	0.983415	80-100th	MRPS15
1	36464345	-	128.052	0.472182	0.961722	60-80th	MRPS15
1	36464378	-	170.595	0.100934	0.944217	40-60th	MRPS15
1	36464388	-	132.328	0.0148203	0.974359	80-100th	MRPS15
1	36464393	-	129.706	0.101583	0.962633	60-80th	MRPS15
1	37514754	-	832.588	0.218729	0.970223	80-100th	MEAF6
1	37554290	-	356.347	-0.0524502	0.94172	40-60th	SNIP1
1	37595884	-	158.535	-0.147033	0.951421	60-80th	GNL2
1	37595887	-	128.859	0.249636	0.942047	40-60th	GNL2
1	37595935	-	1178.11	-0.399978	0.937785	40-60th	GNL2
1	37690517	-	124.318	-0.372401	0.935079	40-60th	AIRIM
1	37690523	-	186.524	-0.0176302	0.807445	0-20th	AIRIM
1	37690529	-	262.269	0.144722	0.912965	20-40th	AIRIM
1	37692491	+	170.788	-0.135148	0.914127	20-40th	CDCA8
1	37692518	+	218.124	-0.318617	0.943089	40-60th	CDCA8
1	37692534	+	115.584	-0.332274	0.929303	40-60th	CDCA8
1	37793847	+	189.647	-0.620897	0.941176	40-60th	MANEAL
1	37807790	+	172.226	-0.15781	0.972927	80-100th	C1orf122
1	37807796	+	239.514	-0.304407	0.984536	80-100th	C1orf122
1	37808208	-	357.092	-0.0337314	0.945409	60-80th	YRDC
1	37859592	-	134.11	0.395871	0.888889	20-40th	MTF1
1	37989986	-	152.846	-0.711845	0.902235	20-40th	SF3A3
1	37989990	-	224.838	-0.393339	0.947368	60-80th	SF3A3
1	37990022	-	1413.24	-0.142714	0.917495	20-40th	SF3A3
1	38005514	-	159.012	-0.725114	0.940171	40-60th	FHL3
1	38012712	+	102.614	0.498061	0.948523	60-80th	UTP11
1	38012727	+	207.241	-0.0977143	0.948958	60-80th	UTP11
1	38012734	+	735.283	-0.190659	0.918332	20-40th	UTP11
1	38012749	+	132.555	-0.0892396	0.934761	40-60th	UTP11
1	38873329	-	398.646	-0.259509	0.978996	80-100th	MYCBP
1	38873348	-	1640.69	-0.310544	0.975153	80-100th	MYCBP
1	38873355	-	152.828	-0.362618	0.925926	40-60th	MYCBP
1	38873356	-	222.752	-0.145813	0.962329	60-80th	MYCBP
1	38873368	-	433.411	-0.340739	0.974093	80-100th	MYCBP
1	38873374	-	167.315	-0.447259	0.89011	20-40th	MYCBP
1	38991245	+	185	0.491491	0.929041	40-60th	AKIRIN1
1	38991288	+	932.53	-0.189697	0.947982	60-80th	AKIRIN1
1	39026318	+	209.806	-0.41761	0.990646	80-100th	NDUFS5
1	39026325	+	1128.76	-0.260611	0.980285	80-100th	NDUFS5
1	39026330	+	246.599	-0.309417	0.979015	80-100th	NDUFS5
1	39026346	+	405.034	-0.972632	0.990897	80-100th	NDUFS5
1	39026350	+	4424.54	-1.07294	0.962563	60-80th	NDUFS5
1	39026371	+	1847.61	-0.306933	0.950366	60-80th	NDUFS5
1	39026373	+	371.925	-0.353071	0.963806	60-80th	NDUFS5
1	39026375	+	679.149	-0.195094	0.941776	40-60th	NDUFS5
1	39026376	+	296.612	-0.353399	0.887237	20-40th	NDUFS5
1	39026382	+	227.99	0.0201896	0.899109	20-40th	NDUFS5
1	39576819	-	113.032	0.258526	0.91453	20-40th	PABPC4
1	39738884	+	184.073	0.178509	0.775574	0-20th	PPIE
1	39883496	-	198.523	0.0252886	0.969741	80-100th	TRIT1
1	39883504	-	769.458	0.0300823	0.961214	60-80th	TRIT1
1	40040730	+	130.464	-0.0085459	0.968863	80-100th	CAP1
1	40040754	+	106.569	-0.265979	0.949023	60-80th	CAP1
1	40040760	+	110.809	-0.502911	0.842336	0-20th	CAP1
1	40040775	+	187.596	-0.854897	0.961886	60-80th	CAP1
1	40097245	-	1135.88	0.0483457	0.964897	80-100th	PPT1
1	40097247	-	2349.64	-0.471002	0.931743	40-60th	PPT1
1	40097254	-	1527.99	-0.0405197	0.943458	40-60th	PPT1
1	40258194	+	133.058	0.126141	0.957746	60-80th	ZMPSTE24
1	40258233	+	143.918	-0.667259	0.848	0-20th	ZMPSTE24
1	40258241	+	102.143	-0.373631	0.940898	40-60th	ZMPSTE24
1	40691689	+	101.963	0.0299577	0.732673	0-20th	NFYC
1	40691722	+	140.726	-0.0123333	0.956811	60-80th	NFYC
1	40979698	+	312.658	0.040398	0.908497	20-40th	CTPS1
1	40979700	+	138.289	0.063065	0.961538	60-80th	CTPS1
1	40979705	+	344.306	0.0322421	0.982156	80-100th	CTPS1
1	40979755	+	982.021	-0.3034	0.929791	40-60th	CTPS1
1	42335232	-	379.241	0.467835	0.906699	20-40th	FOXJ3
1	42335236	-	190.673	1.10789	0.932153	40-60th	FOXJ3
1	42456564	+	121.298	-0.257348	0.965383	80-100th	PPCS
1	42658424	+	3985.61	-0.34894	0.970393	80-100th	PPIH
1	42682418	+	463.448	0.573342	0.972484	80-100th	YBX1
1	42682427	+	4110.06	-1.38428	0.951705	60-80th	YBX1
1	42766986	-	119.424	-0.396287	0.948582	60-80th	P3H1
1	42958861	-	309.589	0.321739	0.920314	20-40th	SLC2A1
1	42958868	-	777.238	0.130075	0.929284	40-60th	SLC2A1
1	43172297	-	451.295	0.512703	0.935902	40-60th	EBNA1BP2
1	43172301	-	192.906	0.527285	0.931578	40-60th	EBNA1BP2
1	43172300	-	116.948	0.619052	0.979405	80-100th	EBNA1BP2
1	43172286	-	561.04	0.244441	0.941935	40-60th	EBNA1BP2
1	43358953	+	371.179	0.563529	0.944503	40-60th	CDC20
1	43358976	+	759.835	0.558854	0.954787	60-80th	CDC20
1	43358988	+	190.344	0.0374862	0.95612	60-80th	CDC20
1	43358989	+	376.018	-0.463018	0.931643	40-60th	CDC20
1	43368011	-	316.175	-0.657733	0.978864	80-100th	ELOVL1
1	43368025	-	127.88	0.229314	0.985185	80-100th	ELOVL1
1	43389791	-	115.122	-0.0550675	0.972222	80-100th	MED8
1	43389797	-	164.043	-0.0103562	0.96319	60-80th	MED8
1	43389798	-	192.867	-0.402813	0.92437	40-60th	MED8
1	43650126	+	106.661	-0.292442	0.72549	0-20th	KDM4A
1	43650136	+	216.433	0.133957	0.97373	80-100th	KDM4A
1	43650149	+	352.967	0.0502453	0.914894	20-40th	KDM4A
1	43946966	+	167.014	0.0432689	0.920103	20-40th	IPO13
1	43969987	+	182.924	-0.257531	0.929569	40-60th	DPH2
1	43969999	+	142.261	-0.344386	0.954345	60-80th	DPH2
1	43970008	+	173.905	-0.289187	0.930834	40-60th	DPH2
1	43970010	+	804.801	-0.603763	0.951859	60-80th	DPH2
1	43970013	+	168.24	-0.44675	0.924431	40-60th	DPH2
1	43974935	+	111.178	-1.26698	0.989583	80-100th	ATP6V0B
1	43974958	+	277.177	-0.467448	0.95316	60-80th	ATP6V0B
1	43974960	+	2863.43	-0.701388	0.967151	80-100th	ATP6V0B
1	44631955	+	496.477	0.391775	0.954545	60-80th	RNF220
1	44631960	+	267.206	0.697711	0.946914	60-80th	RNF220
1	44631968	+	220.431	0.227832	0.714628	0-20th	RNF220
1	44739837	+	375.416	-0.173588	0.952146	60-80th	KIF2C
1	44739862	+	478.911	-0.463076	0.916768	20-40th	KIF2C
1	44775524	+	146.586	-0.0202172	0.846501	0-20th	RPS8
1	44775537	+	442.56	0.0117493	0.9776	80-100th	RPS8
1	44775545	+	1679.95	-0.174981	0.966731	80-100th	RPS8
1	44775547	+	747.89	0.204785	0.923452	40-60th	RPS8
1	44775560	+	146.912	0.342359	0.956623	60-80th	RPS8
1	44775561	+	549.721	-0.190191	0.983202	80-100th	RPS8
1	44775582	+	1276.54	-0.678399	0.978799	80-100th	RPS8
1	44775586	+	708.342	-0.104445	0.967509	80-100th	RPS8
1	44986595	-	363.359	-0.508846	0.967397	80-100th	EIF2B3
1	44986599	-	166.746	-0.579359	0.955687	60-80th	EIF2B3
1	44986610	-	114.074	0.162565	0.943182	40-60th	EIF2B3
1	45012248	+	309.9	-0.289067	0.960716	60-80th	UROD
1	45012252	+	252.652	-0.178678	0.954368	60-80th	UROD
1	45012254	+	989.189	-0.261079	0.979288	80-100th	UROD
1	45012256	+	425.147	-0.398516	0.936552	40-60th	UROD
1	45012258	+	480.616	-0.283665	0.964583	60-80th	UROD
1	45340206	+	153.386	-0.192144	0.914867	20-40th	TOE1
1	45340221	+	182.8	-0.173506	0.907323	20-40th	TOE1
1	45340223	+	157.482	-0.35692	0.963668	60-80th	TOE1
1	45500300	+	307.078	-0.311276	0.952381	60-80th	MMACHC
1	45500316	+	196.932	-0.317329	0.918919	20-40th	MMACHC
1	45500323	+	173.894	0.291535	0.944118	40-60th	MMACHC
1	45521913	-	109.534	0.0940955	0.964268	60-80th	PRDX1
1	45521920	-	114.805	0.0104008	0.906569	20-40th	PRDX1
1	45550826	+	101.322	-0.0262604	0.986201	80-100th	AKR1A1
1	45550841	+	225.536	-0.150029	0.95796	60-80th	AKR1A1
1	45550861	+	123.372	0.379442	0.942957	40-60th	AKR1A1
1	45550898	+	162.881	-0.388891	0.967448	80-100th	AKR1A1
1	45551065	+	183.461	-0.171358	0.971275	80-100th	AKR1A1
1	45584045	+	7294.29	-0.622367	0.949472	60-80th	NASP
1	45584046	+	179.51	-0.663157	0.955009	60-80th	NASP
1	45687090	-	207.191	0.0574094	0.932854	40-60th	GPBP1L1
1	45686527	-	254.709	-0.0560739	0.928009	40-60th	GPBP1L1
1	45688181	+	538.028	-0.329727	0.931914	40-60th	TMEM69
1	45688190	+	110.64	0.203629	0.923851	40-60th	TMEM69
1	45688191	+	111.038	-0.12839	0.90604	20-40th	TMEM69
1	45688202	+	213.896	-0.399738	0.912626	20-40th	TMEM69
1	46303651	+	524.168	-0.228929	0.88631	20-40th	UQCRH
1	46303661	+	975.838	-0.621456	0.977319	80-100th	UQCRH
1	46303663	+	110.847	-0.358234	0.958084	60-80th	UQCRH
1	46303671	+	124.705	-0.0520809	0.940727	40-60th	UQCRH
1	46303691	+	5320.96	-0.425743	0.964389	60-80th	UQCRH
1	46303693	+	476.285	0.064783	0.927682	40-60th	UQCRH
1	46303705	+	198.951	-0.628981	0.965797	80-100th	UQCRH
1	46303720	+	1889.35	1.46657	0.965937	80-100th	UQCRH
1	46340804	+	348.185	0.226699	0.967489	80-100th	NSUN4
1	46340819	+	102.231	0.416548	0.857143	0-20th	NSUN4
1	47314064	-	182.475	0.326902	0.859316	0-20th	STIL
1	47314124	-	150.604	-0.211388	0.981651	80-100th	STIL
1	47314147	-	488.421	-0.251632	0.95572	60-80th	STIL
1	47333914	+	410.372	-0.343976	0.973064	80-100th	CMPK1
1	50970245	+	402.689	0.02938	0.957644	60-80th	CDKN2C
1	50970254	+	262.02	-0.390178	0.951423	60-80th	CDKN2C
1	51236273	+	287.839	0.433653	0.882136	20-40th	RNF11
1	51519271	-	144.198	-0.290962	0.965726	80-100th	EPS15
1	51519275	-	151.704	-0.507219	0.955352	60-80th	EPS15
1	51729857	+	127.908	0.161722	0.945362	60-80th	OSBPL9
1	51729861	+	115.881	-0.156964	0.786885	0-20th	OSBPL9
1	51878727	-	701.96	-0.622031	0.982922	80-100th	NRDC
1	51878750	-	189.206	-0.34587	0.970696	80-100th	NRDC
1	52033803	-	149.192	0.681969	0.926905	40-60th	KTI12
1	52055226	-	132.327	-0.20546	0.984252	80-100th	TXNDC12
1	52056332	+	621.385	-0.472003	0.9754	80-100th	BTF3L4
1	52404406	-	168.711	-0.275867	0.903226	20-40th	ORC1
1	52404417	-	126.631	-0.0898529	0.924377	40-60th	ORC1
1	52404547	+	154.385	-0.135388	0.978295	80-100th	PRPF38A
1	52404561	+	265.345	-0.382654	0.977465	80-100th	PRPF38A
1	52404564	+	784.871	-0.353545	0.92891	40-60th	PRPF38A
1	52404602	+	2578.52	-0.440892	0.915743	20-40th	PRPF38A
1	52553092	-	498.698	0.188569	0.8499	0-20th	TUT4
1	52553099	-	428.115	0.455838	0.965963	80-100th	TUT4
1	52698326	-	130.089	-0.0671294	0.875576	0-20th	COA7
1	52698355	-	145.934	0.0124518	0.906929	20-40th	COA7
1	52842763	+	143.331	-0.0308777	0.962791	60-80th	ZYG11A
1	52927276	+	173.529	0.0229241	0.935275	40-60th	SCP2
1	53014932	+	116.094	-5.51864e-05	0.905058	20-40th	SCP2
1	53014939	+	192.408	0.511014	0.555633	0-20th	SCP2
1	53014941	+	133.653	-0.456342	0.954027	60-80th	SCP2
1	53014943	+	107.959	-0.22868	0.86982	0-20th	SCP2
1	53014947	+	575.392	0.505151	0.894654	20-40th	SCP2
1	53014974	+	144.645	-0.0798383	0.953762	60-80th	SCP2
1	53220617	-	107.442	0.314589	0.935872	40-60th	CZIB
1	53220634	-	110.01	0.0772876	0.98995	80-100th	CZIB
1	53238496	-	980.124	-0.162832	0.929704	40-60th	MAGOH
1	53238506	-	143.185	-0.128952	0.952439	60-80th	MAGOH
1	53238518	-	2284.98	0.446026	0.92571	40-60th	MAGOH
1	53238525	-	681.124	0.124917	0.927495	40-60th	MAGOH
1	53238543	-	341.352	0.0181515	0.965309	80-100th	MAGOH
1	53838267	-	216.026	0.312345	0.987013	80-100th	NDC1
1	53838282	-	1144.46	0.00393436	0.977595	80-100th	NDC1
1	53838301	-	138.293	0.503135	0.938462	40-60th	NDC1
1	53838481	-	137.009	0.285189	0.958763	60-80th	NDC1
1	53838501	-	105.346	-0.0548853	0.969319	80-100th	NDC1
1	53945574	-	244.786	-1.56706	0.971824	80-100th	IFT25
1	53945669	-	124.047	0.628686	0.925439	40-60th	IFT25
1	53945699	-	572.974	0.21927	0.973388	80-100th	IFT25
1	54053201	-	168.887	-0.487693	0.965035	80-100th	TMEM59
1	54053225	-	100.802	0.120268	0.992701	80-100th	TMEM59
1	54053246	-	102.913	0.0493095	0.926658	40-60th	TMEM59
1	54053421	-	525.953	0.139659	0.963386	60-80th	TMEM59
1	54053441	-	132.717	-0.687682	0.963768	60-80th	TMEM59
1	54053637	+	133.425	-0.705323	0.927362	40-60th	TCEANC2
1	54200001	-	170.156	-0.0878725	0.922137	40-60th	CYB5RL
1	54200010	-	220.128	0.517271	0.960591	60-80th	CYB5RL
1	54200170	+	1227.71	0.00204482	0.939874	40-60th	MRPL37
1	54200180	+	352.283	-0.286782	0.97951	80-100th	MRPL37
1	54200183	+	441.007	-0.0458139	0.946387	60-80th	MRPL37
1	54200199	+	133.679	0.3863	0.947253	60-80th	MRPL37
1	54715870	+	260.039	-0.146355	0.924051	40-60th	TTC4
1	54887185	-	482.44	-0.538978	0.936508	40-60th	DHCR24
1	54887195	-	1102.38	-0.63813	0.978196	80-100th	DHCR24
1	58546723	-	257.351	0.148987	0.976292	80-100th	OMA1
1	58546742	-	153.605	-0.349503	0.946524	60-80th	DAB1
1	58546744	-	354.068	-0.137584	0.971647	80-100th	DAB1
1	58700062	-	860.484	0.0874001	0.940166	40-60th	MYSM1
1	58700074	-	135.205	0.788174	0.954545	60-80th	MYSM1
1	58700103	-	120.057	0.884217	0.981132	80-100th	MYSM1
1	58783979	-	156.051	-0.123948	0.875	0-20th	JUN
1	58784043	-	4488.88	0.285054	0.68226	0-20th	JUN
1	62437024	+	306.661	0.628667	0.976923	80-100th	USP1
1	62437029	+	280.689	0.136196	0.88734	20-40th	USP1
1	62437050	+	2629.61	0.851405	0.959597	60-80th	USP1
1	62437051	+	251.211	0.792198	0.878472	20-40th	USP1
1	62437060	+	462.014	0.594327	0.924672	40-60th	USP1
1	62784132	+	266.399	0.67068	0.96203	60-80th	ATG4C
1	62784137	+	109.891	-0.315387	0.960988	60-80th	ATG4C
1	63367650	+	304.632	0.0694756	0.948736	60-80th	ALG6
1	63367655	+	484.504	0.285474	0.953874	60-80th	ALG6
1	63367668	+	223.404	-0.94413	0.974743	80-100th	ALG6
1	63523185	-	228.137	-0.691988	0.912875	20-40th	ITGB3BP
1	63523201	-	246.239	0.0301568	0.907167	20-40th	ITGB3BP
1	63523225	-	861.359	-0.100328	0.94286	40-60th	ITGB3BP
1	63593411	+	272.331	-0.713575	0.982014	80-100th	PGM1
1	64470129	+	163.135	-0.2713	0.962162	60-80th	CACHD1
1	64470142	+	121.835	-0.61873	0.92803	40-60th	CACHD1
1	64966497	-	184.666	-0.0978817	0.945545	60-80th	JAK1
1	65147622	+	112.759	-0.0427858	0.955939	60-80th	AK4
1	65148203	+	111.458	-0.0015478	0.915789	20-40th	AK4
1	65254462	+	121.396	0.306866	0.952778	60-80th	DNAJC6
1	65420668	+	133.796	-0.247903	0.954802	60-80th	LEPROT
1	65420701	+	157.278	0.19366	0.978632	80-100th	LEPROT
1	66924990	+	184.632	-0.273888	0.971154	80-100th	MIER1
1	66930270	+	301.672	-0.317469	0.955679	60-80th	MIER1
1	67430334	-	298.173	-0.479449	0.830296	0-20th	SERBP1
1	67430375	-	214.714	-1.02227	0.846626	0-20th	SERBP1
1	67430376	-	263.277	-0.68228	0.782979	0-20th	SERBP1
1	67430386	-	5399.31	-1.19514	0.969373	80-100th	SERBP1
1	67430411	-	169.912	-0.38507	0.821918	0-20th	SERBP1
1	67430413	-	185.514	0.0187066	0.855072	0-20th	SERBP1
1	67430414	-	567.228	0.188973	0.930172	40-60th	SERBP1
1	67430416	-	415.798	0.309186	0.927145	40-60th	SERBP1
1	67430418	-	1212.55	0.286194	0.802419	0-20th	SERBP1
1	67685201	+	351.523	0.0315779	0.883901	20-40th	GADD45A
1	67685237	+	148.024	1.12859	0.868298	0-20th	GADD45A
1	67833391	-	211.952	0.00532624	0.941818	40-60th	GNG12
1	68232521	-	239.415	0.777599	0.730176	0-20th	WLS
1	68232523	-	1364.12	0.324954	0.953483	60-80th	WLS
1	68232549	-	147.148	0.2274	0.94837	60-80th	WLS
1	68497045	-	309.86	0.69797	0.921546	40-60th	DEPDC1
1	68497067	-	192.068	-0.0385886	0.928775	40-60th	DEPDC1
1	68497106	-	615.284	0.543013	0.938972	40-60th	DEPDC1
1	68497115	-	106.886	0.111356	0.922727	40-60th	DEPDC1
1	70205549	-	129.372	0.543066	0.921951	40-60th	LRRC40
1	70205552	-	656.012	0.186206	0.923706	40-60th	LRRC40
1	70205565	-	205.765	-0.607932	0.969972	80-100th	LRRC40
1	70205579	-	260.042	-0.261922	0.897025	20-40th	LRRC40
1	70205586	-	127.598	0.212459	0.939347	40-60th	LRRC40
1	70205670	+	244.491	0.0243858	0.945753	60-80th	SRSF11
1	70205689	+	382.6	-0.0348017	0.974828	80-100th	SRSF11
1	70205699	+	261.875	-0.288656	0.984816	80-100th	SRSF11
1	70205719	+	643.354	-0.0577649	0.946205	60-80th	SRSF11
1	70205722	+	138.901	0.178111	0.937708	40-60th	SRSF11
1	70205724	+	883.777	0.0598511	0.682856	0-20th	SRSF11
1	70221380	+	293.05	-0.242112	0.916105	20-40th	SRSF11
1	70221479	+	118.498	0.484214	0.827387	0-20th	SRSF11
1	70221481	+	184.069	-0.146759	0.881743	20-40th	SRSF11
1	70221503	+	201.694	0.0620051	0.982041	80-100th	SRSF11
1	70221509	+	332.417	-0.45842	0.981829	80-100th	SRSF11
1	70354718	-	210.919	-0.0157782	0.787989	0-20th	ANKRD13C
1	70354724	-	140.207	-0.149358	0.946903	60-80th	ANKRD13C
1	70411254	+	195.146	0.709288	0.975558	80-100th	CTH
1	70411257	+	171.443	0.504512	0.924382	40-60th	CTH
1	70411276	+	117.89	0.14527	0.894212	20-40th	CTH
1	71081029	-	1645.18	-0.335076	0.935056	40-60th	ZRANB2
1	71081031	-	211.779	-0.507556	0.933455	40-60th	ZRANB2
1	71081033	-	466.342	0.0708606	0.922994	40-60th	ZRANB2
1	71081034	-	277.18	-0.0307316	0.841401	0-20th	ZRANB2
1	74733114	+	309.375	-0.0945977	0.944556	40-60th	TYW3
1	74733174	+	401.86	0.210472	0.935906	40-60th	TYW3
1	75724706	+	187.443	-0.180918	0.982469	80-100th	ACADM
1	75724709	+	521.863	-0.252361	0.959087	60-80th	ACADM
1	75724714	+	140.557	-0.26648	0.898894	20-40th	ACADM
1	75724758	+	569.004	-0.228142	0.931899	40-60th	ACADM
1	75786268	+	164.435	-0.277506	0.879415	20-40th	RABGGTB
1	77219406	-	1897.31	0.493978	0.945828	60-80th	PIGK
1	77219430	-	1974.84	-0.457439	0.979031	80-100th	PIGK
1	77219447	-	118.772	-0.0897849	0.959596	60-80th	PIGK
1	77683374	-	183.416	0.674364	0.963585	60-80th	ZZZ3
1	77683398	-	329.937	0.693486	0.954724	60-80th	ZZZ3
1	77759811	-	297.495	0.0947313	0.950974	60-80th	USP33
1	77779656	+	124.489	0.0659114	0.957447	60-80th	MIGA1
1	77779661	+	141.622	-0.0266699	0.970684	80-100th	MIGA1
1	77979077	-	968.799	0.345182	0.933657	40-60th	FUBP1
1	77979098	-	122.468	-0.122005	0.900735	20-40th	FUBP1
1	84479245	+	118.086	0.187147	0.943052	40-60th	RPF1
1	84479259	+	460.686	0.0468089	0.946763	60-80th	RPF1
1	84479263	+	141.912	0.683431	0.934783	40-60th	RPF1
1	84479264	+	381.167	0.280555	0.982169	80-100th	RPF1
1	84479267	+	3122.49	0.334221	0.886867	20-40th	RPF1
1	84479272	+	262.688	-0.0654292	0.956835	60-80th	RPF1
1	84479276	+	254.126	0.388149	0.92487	40-60th	RPF1
1	84506198	-	471.751	-0.643033	0.940694	40-60th	GNG5
1	84506204	-	978.25	-0.850191	0.977578	80-100th	GNG5
1	85276368	-	157.888	-0.381756	0.963542	60-80th	BCL10
1	85465157	-	251.614	0.39721	0.944262	40-60th	DDAH1
1	85465159	-	561.248	0.305921	0.955823	60-80th	DDAH1
1	85465206	-	176.542	0.0279519	0.92638	40-60th	DDAH1
1	85708388	-	159.001	0.293141	0.911538	20-40th	ZNHIT6
1	85708415	-	1096.18	0.0234941	0.926683	40-60th	ZNHIT6
1	85708420	-	206.954	0.236355	0.946176	60-80th	ZNHIT6
1	85708424	-	230.393	1.2382	0.927043	40-60th	ZNHIT6
1	85708433	-	867.005	0.271787	0.93188	40-60th	ZNHIT6
1	86396283	-	373.217	-0.221379	0.938109	40-60th	ODF2L
1	86396303	-	117.819	-0.042181	0.968807	80-100th	ODF2L
1	86396323	-	302.322	-0.08698	0.748376	0-20th	ODF2L
1	86704600	+	181.003	-0.145068	0.944	40-60th	SH3GLB1
1	86704602	+	143.196	-0.166941	0.730769	0-20th	SH3GLB1
1	86914339	-	120.382	-0.648187	0.977528	80-100th	SELENOF
1	86914328	-	134.086	-0.102386	0.84585	0-20th	SELENOF
1	86914113	-	145.449	0.567216	0.854775	0-20th	SELENOF
1	86914114	-	900.185	0.340081	0.956482	60-80th	SELENOF
1	86914122	-	220.013	0.178964	0.939993	40-60th	SELENOF
1	86914124	-	244.415	0.360589	0.914413	20-40th	SELENOF
1	86914126	-	1493.42	-0.10798	0.978452	80-100th	SELENOF
1	86914134	-	142.408	-0.154549	0.98037	80-100th	SELENOF
1	87328866	+	154.206	0.122161	0.890511	20-40th	LMO4
1	88684239	+	132.739	0.0433862	0.927711	40-60th	PKN2
1	88684241	+	130.546	0.181027	0.952941	60-80th	PKN2
1	88684245	+	178.414	0.802717	0.901639	20-40th	PKN2
1	88684337	+	130.051	0.104104	0.967033	80-100th	PKN2
1	88891564	-	1181.55	-0.373292	0.925598	40-60th	GTF2B
1	88992608	-	143.7	-0.488052	0.961003	60-80th	RBMXL1
1	88992622	-	212.665	-0.30175	0.961046	60-80th	RBMXL1
1	88992629	-	499.501	-0.46323	0.954218	60-80th	RBMXL1
1	89821032	+	127.055	0.648559	0.910619	20-40th	LRRC8D
1	89995110	+	672.194	0.395546	0.982172	80-100th	ZNF326
1	91021965	-	282.233	0.737199	0.970149	80-100th	ZNF644
1	91022025	-	142.979	1.35689	0.950073	60-80th	ZNF644
1	91022232	-	181.744	0.151823	0.909341	20-40th	ZNF644
1	91500814	+	290.008	-0.1525	0.926854	40-60th	CDC7
1	91500858	+	283.665	0.203864	0.94368	40-60th	CDC7
1	91500869	+	128.575	0.529385	0.940994	40-60th	CDC7
1	91500880	+	505.522	-0.336354	0.956052	60-80th	CDC7
1	91500888	+	160.81	0.0230539	0.945892	60-80th	CDC7
1	91886122	-	120.454	-0.0691679	0.944954	40-60th	TGFBR3
1	91886151	-	186.748	-0.0876635	0.875	0-20th	TGFBR3
1	92298974	-	148.116	0.279544	0.948718	60-80th	GLMN
1	92298987	-	202.666	-0.040743	0.994778	80-100th	GLMN
1	92299059	+	774.925	0.558283	0.96108	60-80th	RPAP2
1	92831990	+	315.166	-0.680496	0.93279	40-60th	RPL5
1	92832011	+	1202.05	-0.288458	0.947207	60-80th	RPL5
1	92832013	+	1382.42	-0.228049	0.946536	60-80th	RPL5
1	92832015	+	100.266	-0.500252	0.841837	0-20th	RPL5
1	92832028	+	234.703	0.164271	0.201794	0-20th	RPL5
1	92832029	+	110.041	-0.357403	0.267327	0-20th	RPL5
1	92832049	+	1032.34	-0.320047	0.903245	20-40th	RPL5
1	92832056	+	393.694	0.000384397	0.941349	40-60th	RPL5
1	92832073	+	6919.51	0.0101055	0.952276	60-80th	RPL5
1	93079241	+	112.205	-0.192526	0.939815	40-60th	MTF2
1	93079270	+	232.844	0.0474088	0.969586	80-100th	MTF2
1	93079283	+	1878.76	-0.0343957	0.962054	60-80th	MTF2
1	93079293	+	116.452	0.0970839	0.929927	40-60th	MTF2
1	93079298	+	565.37	0.168121	0.873723	0-20th	MTF2
1	93180339	-	403.857	0.212146	0.934466	40-60th	TMED5
1	93180346	-	254.158	0.00198242	0.913514	20-40th	TMED5
1	93180386	-	308.241	-0.146744	0.949153	60-80th	TMED5
1	93180420	-	342.98	-0.0276614	0.926829	40-60th	TMED5
1	93180429	-	149.18	0.801724	0.956962	60-80th	TMED5
1	93345909	+	676.793	0.434072	0.883694	20-40th	DR1
1	93345935	+	1531.48	0.284896	0.95432	60-80th	DR1
1	93345949	+	116.596	-0.11777	0.956616	60-80th	DR1
1	93879179	-	187.63	-0.288903	0.9226	40-60th	DNTTIP2
1	93879186	-	180.991	-0.340089	0.879093	20-40th	DNTTIP2
1	93879204	-	104.077	-0.203357	0.93617	40-60th	DNTTIP2
1	93909399	-	157.06	0.197456	0.952381	60-80th	GCLM
1	93909430	-	533.551	0.630311	0.920266	20-40th	GCLM
1	93909456	-	273.788	0.492118	0.881007	20-40th	GCLM
1	94418392	+	205.097	-0.0932348	0.993939	80-100th	ABCD3
1	94418413	+	335.936	-1.16743	0.960258	60-80th	ABCD3
1	94418416	+	212.704	0.0474504	0.867257	0-20th	ABCD3
1	94418473	+	136.475	0.177278	0.845161	0-20th	ABCD3
1	94927110	-	535.088	0.260716	0.951515	60-80th	CNN3
1	94927136	-	113.508	-0.460254	0.946565	60-80th	CNN3
1	94927137	-	344.093	-0.411881	0.977099	80-100th	CNN3
1	95072951	-	409.285	0.113863	0.957409	60-80th	ALG14
1	95234155	+	138.579	0.656169	0.928962	40-60th	RWDD3
1	95234225	+	172.72	-0.0752793	0.931067	40-60th	RWDD3
1	96721784	+	489.676	-0.126123	0.972912	80-100th	PTBP2
1	96721791	+	501.491	0.418265	0.962828	60-80th	PTBP2
1	99766627	-	501.885	-0.339582	0.956873	60-80th	FRRS1
1	99766636	-	204.578	0.158121	0.925636	40-60th	FRRS1
1	99969998	+	126.202	1.13587	0.956989	60-80th	SLC35A3
1	100038097	+	282.374	0.0840883	0.949591	60-80th	MFSD14A
1	100038133	+	122.819	0.00359921	0.895954	20-40th	MFSD14A
1	100038168	+	307.27	0.401697	0.93343	40-60th	MFSD14A
1	100132904	-	169.632	0.00158033	0.810761	0-20th	SASS6
1	100132910	-	103.275	0.306801	0.919255	20-40th	SASS6
1	100132924	-	103.05	0.0039185	0.947485	60-80th	SASS6
1	100133163	+	751.685	0.256348	0.969025	80-100th	TRMT13
1	100133165	+	243.477	0.664296	0.917098	20-40th	TRMT13
1	100133166	+	103.213	0.501245	0.89834	20-40th	TRMT13
1	100133169	+	220.625	0.458479	0.530159	0-20th	TRMT13
1	100249834	-	500.045	-0.0169089	0.936152	40-60th	DBT
1	100266216	+	1208.17	0.261014	0.972042	80-100th	RTCA
1	100894811	-	102.343	0.274365	0.866727	0-20th	EXTL2
1	100894842	-	153.751	0.109668	0.974937	80-100th	EXTL2
1	100896092	+	116.596	0.576118	0.931153	40-60th	SLC30A7
1	100896096	+	124.416	0.45037	0.928406	40-60th	SLC30A7
1	101025754	-	149.448	-0.381204	0.861527	0-20th	DPH5
1	101025773	-	123.769	-0.212211	0.904707	20-40th	DPH5
1	107056704	+	362.815	0.363514	0.930334	40-60th	PRMT6
1	108692310	+	520.727	-0.135129	0.952649	60-80th	PRPF38B
1	108692321	+	121.145	-0.469798	0.974359	80-100th	PRPF38B
1	108692327	+	1003.42	-0.215845	0.937651	40-60th	PRPF38B
1	108692337	+	436.939	-0.101894	0.946822	60-80th	PRPF38B
1	108746686	+	430.56	0.308376	0.947273	60-80th	STXBP3
1	108963462	-	157.417	-1.09764	0.972887	80-100th	CLCC1
1	108963480	-	634.677	0.0211463	0.935218	40-60th	CLCC1
1	108963488	-	194.897	-0.294937	0.980562	80-100th	CLCC1
1	108963499	-	115.95	-0.0746133	0.955102	60-80th	CLCC1
1	109042106	-	111.91	1.12972	0.961446	60-80th	WDR47
1	109075953	-	323.669	-0.122882	0.904225	20-40th	TAF13
1	109075973	-	100.827	0.0294162	0.806452	0-20th	TAF13
1	109075976	-	327.807	0.0751328	0.931818	40-60th	TAF13
1	109075983	-	223.609	0.15939	0.972222	80-100th	TAF13
1	109075994	-	234.514	0.088717	0.966273	80-100th	TAF13
1	109076003	-	1214.72	0.538362	0.945052	60-80th	TAF13
1	109076006	-	222.238	0.440642	0.836449	0-20th	TAF13
1	109090773	+	241.782	-0.165133	0.956723	60-80th	TMEM167B
1	109213907	+	165.346	-0.217243	0.943307	40-60th	SARS1
1	109213920	+	536.834	-0.134098	0.945273	60-80th	SARS1
1	109213932	+	1109.09	-0.0766984	0.92365	40-60th	SARS1
1	109283144	-	165.274	0.340121	0.939961	40-60th	PSRC1
1	109397903	-	433.406	-0.0280509	0.961101	60-80th	SORT1
1	109426437	-	2218.28	-0.414285	0.935353	40-60th	PSMA5
1	109426448	-	2128.44	-0.192346	0.939986	40-60th	PSMA5
1	109426434	-	266.88	0.294721	0.902338	20-40th	PSMA5
1	109548584	+	101.418	-0.127406	0.976271	80-100th	GNAI3
1	109548586	+	214.101	-0.303842	0.985465	80-100th	GNAI3
1	109548606	+	214.22	-0.0144417	0.877076	20-40th	GNAI3
1	109548622	+	105.17	-0.0250107	0.622642	0-20th	GNAI3
1	109548635	+	1383.17	0.0116139	0.986054	80-100th	GNAI3
1	109548638	+	361.001	0.158149	0.930764	40-60th	GNAI3
1	109548641	+	140.728	0.369979	0.869565	0-20th	GNAI3
1	109619846	+	107.95	-0.189903	0.952012	60-80th	AMPD2
1	109619886	+	145.787	-0.318815	0.908007	20-40th	AMPD2
1	109668057	+	456.404	-0.433373	0.978361	80-100th	GSTM2
1	109668059	+	158.441	-0.443769	0.706468	0-20th	GSTM2
1	109668094	+	162.671	-0.129904	0.992478	80-100th	GSTM2
1	109740316	-	709.503	-0.961757	0.985657	80-100th	GSTM3
1	109984786	+	324.096	-0.712801	0.955631	60-80th	AHCYL1
1	110339425	+	272.464	0.122583	0.941019	40-60th	RBM15
1	110339447	+	124.471	1.04343	0.815126	0-20th	RBM15
1	110407694	-	274.145	-0.56066	0.955342	60-80th	LAMTOR5
1	110407743	-	109.02	-0.0633453	0.9438	40-60th	LAMTOR5
1	110963909	-	105.111	-0.0680729	0.937255	40-60th	LRIF1
1	110963920	-	174.638	-0.312039	0.885845	20-40th	LRIF1
1	111140082	-	192.017	-0.18904	0.966076	80-100th	DRAM2
1	111140211	+	180.075	0.394639	0.945277	60-80th	CEPT1
1	111140220	+	111.847	0.193716	0.939303	40-60th	CEPT1
1	111140229	+	146.835	1.08622	0.971186	80-100th	CEPT1
1	111140247	+	400.909	-0.166634	0.948291	60-80th	CEPT1
1	111140251	+	208.493	-0.836106	0.97088	80-100th	CEPT1
1	111140255	+	105.042	-0.391832	0.947183	60-80th	CEPT1
1	111449256	-	1050.1	-0.00642883	0.968019	80-100th	WDR77
1	111449292	-	204.194	0.0306834	0.976	80-100th	WDR77
1	111449430	+	171.703	-0.13014	0.95561	60-80th	ATP5PB
1	111449441	+	147.28	-0.870434	0.974777	80-100th	ATP5PB
1	111449449	+	153.145	-0.309687	0.947848	60-80th	ATP5PB
1	111449451	+	809.928	-0.23134	0.950901	60-80th	ATP5PB
1	111449458	+	371.263	-0.239259	0.941441	40-60th	ATP5PB
1	111449465	+	1222.7	-0.784218	0.981046	80-100th	ATP5PB
1	111449482	+	246.447	-0.342875	0.957019	60-80th	ATP5PB
1	111449484	+	1025.53	-0.295965	0.976591	80-100th	ATP5PB
1	111449494	+	1883.89	-0.637622	0.976961	80-100th	ATP5PB
1	111449503	+	392.114	-0.470141	0.897682	20-40th	ATP5PB
1	111449505	+	156.551	0.0735844	0.907906	20-40th	ATP5PB
1	111449514	+	427.026	0.00845537	0.908379	20-40th	ATP5PB
1	111449517	+	122.099	-0.603521	0.872624	0-20th	ATP5PB
1	111755702	+	246.441	-0.225782	0.900878	20-40th	DDX20
1	111755904	+	160.457	0.00641057	0.950119	60-80th	DDX20
1	111755906	+	165.337	0.0684359	0.959881	60-80th	DDX20
1	112619784	+	241.429	-0.268721	0.96038	60-80th	CAPZA1
1	112619818	+	966.021	-0.0967306	0.976966	80-100th	CAPZA1
1	112619832	+	14941.6	0.140146	0.972156	80-100th	CAPZA1
1	112619834	+	722.906	0.304848	0.970739	80-100th	CAPZA1
1	112619835	+	691.744	0.210805	0.79171	0-20th	CAPZA1
1	112619837	+	430.689	0.12402	0.905199	20-40th	CAPZA1
1	112619842	+	100.848	0.730874	0.575521	0-20th	CAPZA1
1	112707127	-	423.155	-0.939132	0.964813	80-100th	RHOC
1	112956194	-	127.122	0.141395	0.657843	0-20th	SLC16A1
1	112956195	-	14235.9	0.0574341	0.897163	20-40th	SLC16A1
1	112956197	-	2256.12	-0.0669149	0.907661	20-40th	SLC16A1
1	112956199	-	581.554	-0.0270515	0.917197	20-40th	SLC16A1
1	112956217	-	609.091	0.951039	0.967914	80-100th	SLC16A1
1	112956224	-	327.725	0.491649	0.967919	80-100th	SLC16A1
1	112956245	-	163.01	0.220902	0.973684	80-100th	SLC16A1
1	113390515	+	409.913	0.123759	0.93345	40-60th	MAGI3
1	113759473	-	115.909	0.13709	0.933649	40-60th	PHTF1
1	113759486	-	146.92	0.136993	0.960938	60-80th	PHTF1
1	113812289	-	102.041	-0.147482	0.908932	20-40th	RSBN1
1	114581594	-	156.606	0.322088	0.928879	40-60th	BCAS2
1	114581609	-	316.447	-0.0740866	0.893048	20-40th	BCAS2
1	114581613	-	891.646	-0.324051	0.961128	60-80th	BCAS2
1	114581617	-	116.874	0.0250961	0.927961	40-60th	BCAS2
1	114581618	-	169.426	0.509815	0.942584	40-60th	BCAS2
1	114581619	-	437.29	0.459612	0.948887	60-80th	BCAS2
1	114581620	-	791.478	0.394605	0.962329	60-80th	BCAS2
1	114581622	-	996.992	0.622137	0.925496	40-60th	BCAS2
1	114581628	-	277.682	-0.179927	0.964575	60-80th	BCAS2
1	114581644	-	229.508	-0.368971	0.955173	60-80th	BCAS2
1	114716735	-	119.569	0.152213	0.865714	0-20th	NRAS
1	114716762	-	453.168	0.312753	0.949698	60-80th	NRAS
1	114716763	-	460.03	0.45545	0.9475	60-80th	NRAS
1	114757960	-	636.891	-0.352731	0.778516	0-20th	CSDE1
1	114757977	-	1121.93	-0.357701	0.951149	60-80th	CSDE1
1	114757981	-	2790.84	-0.175353	0.95437	60-80th	CSDE1
1	114757987	-	4017.23	-0.248313	0.963831	60-80th	CSDE1
1	114757991	-	115.051	-0.0640978	0.914894	20-40th	CSDE1
1	114757993	-	616.744	0.210999	0.949226	60-80th	CSDE1
1	114757997	-	571.262	0.171632	0.960359	60-80th	CSDE1
1	114757998	-	200.797	-0.191231	0.927903	40-60th	CSDE1
1	114758000	-	287.717	-0.525678	0.953026	60-80th	CSDE1
1	114758012	-	198.707	0.00788954	0.975451	80-100th	CSDE1
1	114780631	-	317.254	-0.311337	0.915254	20-40th	SIKE1
1	114780644	-	246.807	0.0899142	0.953299	60-80th	SIKE1
1	114780666	-	223.301	-0.18025	0.973483	80-100th	SIKE1
1	114780674	-	140.041	-0.126978	0.940735	40-60th	SIKE1
1	114780685	-	317.88	0.456009	0.92384	40-60th	SIKE1
1	115641970	+	141.119	0.0187389	0.935368	40-60th	VANGL1
1	116373212	+	101.845	-0.196383	0.943396	40-60th	ATP1A1
1	117060327	+	454.712	-0.256856	0.950739	60-80th	TTF2
1	117060341	+	124.409	-0.163845	0.964409	60-80th	TTF2
1	117929578	-	162.267	0.068118	0.926941	40-60th	GDAP2
1	117929583	-	127.11	0.1247	0.948718	60-80th	GDAP2
1	117929621	-	142.56	-0.215432	0.991667	80-100th	GDAP2
1	117929735	+	151.563	-0.216482	0.940928	40-60th	WDR3
1	117929754	+	1140.01	-0.353681	0.90069	20-40th	WDR3
1	117929755	+	193.653	-0.362151	0.959497	60-80th	WDR3
1	119140664	-	181.866	-0.0775336	0.963855	60-80th	WARS2
1	119140667	-	224.544	0.188824	0.941828	40-60th	WARS2
1	119140671	-	136.216	0.190076	0.959079	60-80th	WARS2
1	119711926	+	454.448	-0.542069	0.952376	60-80th	PHGDH
1	119711929	+	113.281	-0.630231	0.93047	40-60th	PHGDH
1	119711936	+	9049.01	-0.630421	0.942055	40-60th	PHGDH
1	119711940	+	2577.92	-0.645729	0.947754	60-80th	PHGDH
1	120176462	-	624.693	-0.162511	0.937984	40-60th	SEC22B
1	120176469	-	127.413	-0.20985	0.928916	40-60th	SEC22B
1	120176493	-	185.462	0.303164	0.965569	80-100th	SEC22B
1	120176501	-	139.526	0.26999	0.923336	40-60th	SEC22B
1	120176515	-	481.207	-0.0316644	0.98336	80-100th	SEC22B
1	120176520	-	1160.01	-0.0406296	0.953426	60-80th	SEC22B
1	145608048	+	419.248	-0.359879	0.970203	80-100th	GPR89A
1	145824200	+	156.914	-0.00593964	0.943099	40-60th	POLR3C
1	145927451	-	414.36	0.186093	0.95	60-80th	RBM8A
1	145927453	-	5173.72	0.232854	0.938044	40-60th	RBM8A
1	145927467	-	135.509	0.288808	0.845902	0-20th	RBM8A
1	145927484	-	592.844	-0.0357961	0.967244	80-100th	RBM8A
1	145958002	-	179.137	-0.393102	0.963526	60-80th	LIX1L
1	145958009	-	119.742	-0.257784	0.955882	60-80th	LIX1L
1	145964690	+	234.208	-0.614625	0.976362	80-100th	POLR3GL
1	145964716	+	218.371	-0.0647064	0.917634	20-40th	POLR3GL
1	145964719	+	273.743	-0.192439	0.937762	40-60th	POLR3GL
1	145996577	-	188.14	1.43287	0.916502	20-40th	TXNIP
1	145996578	-	231.482	1.17139	0.923112	40-60th	TXNIP
1	145996579	-	507.761	1.19529	0.932245	40-60th	TXNIP
1	147172470	-	155.629	0.0449113	0.985897	80-100th	PRKAB2
1	147541501	+	120.965	-0.5167	0.922071	40-60th	BCL9
1	147670474	-	113.087	-0.070353	0.913687	20-40th	ACP6
1	147928451	+	119.25	0.0716013	0.947619	60-80th	GPR89B
1	148152313	-	134.627	0.193698	0.984199	80-100th	NBPF11
1	149812370	-	87929.9	-0.478377	0.706579	0-20th	H2BC18
1	149812360	-	1682.12	-0.243546	0.711538	0-20th	H2BC18
1	149812352	-	192.711	-0.757151	0.015873	0-20th	H2BC18
1	149832655	+	324.342	0.906309	0.860697	0-20th	H4C14
1	149832657	+	1225.31	1.31988	0.853257	0-20th	H4C14
1	149861159	-	44935.3	1.07174	0.874627	0-20th	H4C15
1	149861161	-	10499.5	0.78343	0.83156	0-20th	H4C15
1	149886653	-	139.332	-0.109591	0.949153	60-80th	H2BC21
1	149886682	-	127142	-0.262738	0.870436	0-20th	H2BC21
1	149886918	+	71822.9	0.0257671	0.825375	0-20th	H2AC20
1	149886919	+	17000	-0.212264	0.910481	20-40th	H2AC20
1	149886924	+	2080.28	-0.405301	0.778786	0-20th	H2AC20
1	149887961	-	703.825	-0.30055	0.769697	0-20th	H2AC21
1	149887963	-	9738.03	-0.807421	0.80184	0-20th	H2AC21
1	149917842	-	175.299	0.0395789	0.938144	40-60th	SV2A
1	149927779	-	104.134	-0.0543617	0.75	0-20th	SF3B4
1	149927781	-	244.477	0.0458272	0.842975	0-20th	SF3B4
1	149927800	-	120.666	-0.217372	0.922737	40-60th	SF3B4
1	149927803	-	1461.8	-0.284294	0.985635	80-100th	SF3B4
1	150010726	-	280.524	0.500435	0.953271	60-80th	OTUD7B
1	150010734	-	102.86	0.272924	0.964646	60-80th	OTUD7B
1	150067840	+	205.723	-0.22664	0.941544	40-60th	VPS45
1	150235949	-	175.775	0.139217	0.928339	40-60th	ANP32E
1	150235956	-	206.382	-0.188576	0.90311	20-40th	ANP32E
1	150235978	-	262.025	0.492698	0.708333	0-20th	ANP32E
1	150235987	-	176.328	-0.103999	0.965893	80-100th	ANP32E
1	150236001	-	217.909	0.128275	0.641439	0-20th	ANP32E
1	150236012	-	291.416	-0.631011	0.902299	20-40th	ANP32E
1	150236112	-	4461.63	0.230218	0.893172	20-40th	ANP32E
1	150236144	-	239.109	0.268825	0.934783	40-60th	ANP32E
1	150268979	-	489.839	0.403756	0.927654	40-60th	APH1A
1	150268995	-	126.059	-0.27045	0.93238	40-60th	APH1A
1	150268996	-	177.792	0.265672	0.915323	20-40th	APH1A
1	150269025	-	317.956	0.219574	0.961259	60-80th	APH1A
1	150269060	-	108.302	0.255939	0.951557	60-80th	APH1A
1	150293842	+	636.039	0.100927	0.965282	80-100th	MRPS21
1	150293858	+	480.287	-0.333744	0.961873	60-80th	MRPS21
1	150293862	+	302.812	-0.444375	0.967351	80-100th	MRPS21
1	150293864	+	101.489	0.039006	0.969732	80-100th	MRPS21
1	150293881	+	717.29	-0.349911	0.968192	80-100th	MRPS21
1	150293885	+	682.594	-0.308156	0.925976	40-60th	MRPS21
1	150321533	+	391.026	-0.175676	0.961712	60-80th	PRPF3
1	150364170	+	241.623	0.301355	0.840198	0-20th	RPRD2
1	150364180	+	122.536	0.0927571	0.440217	0-20th	RPRD2
1	150487435	+	296.22	-0.5858	0.909605	20-40th	TARS2
1	150579603	-	345.508	-0.255659	0.800609	0-20th	MCL1
1	150579610	-	6089.41	-0.0961234	0.920031	20-40th	MCL1
1	150629583	-	192.172	0.0540548	0.921114	20-40th	ENSA
1	150629577	-	4766.69	-0.114894	0.971103	80-100th	ENSA
1	150629582	-	122.706	-0.508416	0.933941	40-60th	ENSA
1	150629590	-	153.971	-0.124098	0.966852	80-100th	ENSA
1	150629596	-	3172.36	-1.7342e-05	0.942909	40-60th	ENSA
1	150629605	-	260.028	-0.675741	0.935818	40-60th	ENSA
1	150629606	-	242.266	0.818304	0.864764	0-20th	ENSA
1	150629612	-	697.457	-0.327613	0.870708	0-20th	ENSA
1	150697149	-	362.031	-0.0670679	0.908585	20-40th	GOLPH3L
1	150697184	-	148.928	-0.459619	0.913309	20-40th	GOLPH3L
1	151008461	+	319.257	-0.56117	0.943772	40-60th	PRUNE1
1	151008557	+	209.032	0.562702	0.910224	20-40th	PRUNE1
1	151059573	-	452.731	-0.648223	0.96375	60-80th	CDC42SE1
1	151059583	-	191.736	-0.304298	0.939759	40-60th	CDC42SE1
1	151166056	+	265.263	0.0558303	0.450549	0-20th	SCNM1
1	151166144	+	658.933	-0.365332	0.921541	40-60th	SCNM1
1	151190173	-	497.455	0.173204	0.917815	20-40th	VPS72
1	151190197	-	597.2	0.221846	0.928924	40-60th	VPS72
1	151198544	+	173.971	0.00407093	0.943478	40-60th	PIP5K1A
1	151198596	+	155.243	0.174398	0.9375	40-60th	PIP5K1A
1	151254752	+	327.031	-0.825614	0.984615	80-100th	PSMD4
1	151254772	+	151.179	-0.0720943	0.896667	20-40th	PSMD4
1	151254773	+	171.05	-0.891161	0.925926	40-60th	PSMD4
1	151327416	-	115.738	-0.11336	0.972477	80-100th	PI4KB
1	151327657	-	481.446	0.298776	0.921797	40-60th	PI4KB
1	151327669	-	141.816	-0.0305482	0.86413	0-20th	PI4KB
1	151327699	-	108.442	0.015741	0.942904	40-60th	PI4KB
1	151347249	-	232.017	-0.568129	0.948276	60-80th	RFX5
1	151347293	-	109.953	0.12667	0.881313	20-40th	RFX5
1	151399534	+	159.819	0.0237884	0.960074	60-80th	PSMB4
1	151399564	+	6252.31	0.466407	0.975204	80-100th	PSMB4
1	151459179	-	621.743	0.0430402	0.941995	40-60th	POGZ
1	151540309	+	301.53	-0.228054	0.906367	20-40th	TUFT1
1	151763496	-	1811.95	-0.374955	0.964108	60-80th	MRPL9
1	151993842	-	123.04	-0.166933	0.934783	40-60th	S100A10
1	151993855	-	129.024	-0.741022	0.965517	80-100th	S100A10
1	151993859	-	431.043	-0.272791	0.971698	80-100th	S100A10
1	152036972	-	234.358	-1.09501	0.932172	40-60th	S100A11
1	153627505	-	863.825	-0.512464	0.975642	80-100th	S100A13
1	153634038	+	106.568	0.29262	0.944532	40-60th	CHTOP
1	153634051	+	128.219	0.354945	0.932817	40-60th	CHTOP
1	153634059	+	132.672	0.340749	0.907781	20-40th	CHTOP
1	153634075	+	1985.53	0.272332	0.899134	20-40th	CHTOP
1	153634087	+	203.627	-0.211194	0.913043	20-40th	CHTOP
1	153634089	+	217.123	-0.114737	0.89404	20-40th	CHTOP
1	153658717	+	474.483	-0.181944	0.957907	60-80th	SNAPIN
1	153658736	+	113.483	0.265145	0.941248	40-60th	SNAPIN
1	153670944	-	312.554	0.196115	0.89795	20-40th	ILF2
1	153670972	-	1920.79	-0.185748	0.876353	20-40th	ILF2
1	153670987	-	4612.94	-0.172037	0.956516	60-80th	ILF2
1	153728073	+	591.286	-0.221031	0.979592	80-100th	INTS3
1	153963511	-	483.343	0.0779699	0.953751	60-80th	SLC39A1
1	153963515	-	1180.84	0.021787	0.945275	60-80th	SLC39A1
1	153963537	-	279.718	-0.806343	0.927357	40-60th	SLC39A1
1	153963549	-	176.893	-0.0263751	0.938556	40-60th	SLC39A1
1	153963550	-	235.172	-0.0273615	0.953762	60-80th	SLC39A1
1	153977336	-	155.733	0.147048	0.911846	20-40th	JTB
1	153977341	-	319.766	0.300031	0.951664	60-80th	JTB
1	153977656	-	315.627	0.23595	0.763158	0-20th	JTB
1	153977658	-	2379.2	0.0629813	0.905512	20-40th	JTB
1	153977661	-	160.087	0.253629	0.9	20-40th	JTB
1	153977663	-	362.989	0.447367	0.958175	60-80th	JTB
1	153977674	-	374.975	0.120184	0.95465	60-80th	JTB
1	153977703	-	163.513	0.231173	0.934478	40-60th	JTB
1	154183193	-	180.85	-0.565796	0.918605	20-40th	TPM3
1	154183197	-	127.729	-0.0466243	0.923077	40-60th	TPM3
1	154183218	-	395.418	-0.424139	0.97351	80-100th	TPM3
1	154220552	-	247.799	0.104095	0.835206	0-20th	C1orf43
1	154220560	-	356.539	0.493221	0.946763	60-80th	C1orf43
1	154220621	-	166.802	-0.0709548	0.935827	40-60th	C1orf43
1	154220637	-	880.173	-0.293543	0.932047	40-60th	C1orf43
1	154220681	-	114.569	0.743649	0.852814	0-20th	C1orf43
1	154220916	+	249.472	0.0629213	0.936111	40-60th	UBAP2L
1	154220917	+	178.36	-0.030019	0.958801	60-80th	UBAP2L
1	154220922	+	349.414	-0.00661976	0.950704	60-80th	UBAP2L
1	154220958	+	1283.55	-0.224315	0.940081	40-60th	UBAP2L
1	154272589	+	114.882	-0.282437	0.944477	40-60th	HAX1
1	154272641	+	1663.33	-0.0427063	0.946099	60-80th	HAX1
1	154272649	+	555.273	-0.464091	0.924843	40-60th	HAX1
1	154272661	+	134.872	-0.400103	0.961894	60-80th	HAX1
1	154325525	+	468.293	0.512842	0.950125	60-80th	ATP8B2
1	154325554	+	106.355	0.710829	0.966361	80-100th	ATP8B2
1	154627971	-	615.109	0.734119	0.944531	40-60th	ADAR
1	154627976	-	457.723	0.258845	0.965322	80-100th	ADAR
1	154627987	-	302.024	-0.0627659	0.941176	40-60th	ADAR
1	154961731	-	277.316	0.165396	0.913514	20-40th	PYGO2
1	154974375	-	142.682	0.340081	0.889344	20-40th	SHC1
1	154974661	+	140.247	-0.861597	0.926471	40-60th	CKS1B
1	154974666	+	336.753	-0.0664757	0.949367	60-80th	CKS1B
1	154974678	+	129.135	-0.478849	0.987421	80-100th	CKS1B
1	154974694	+	293.734	-1.09688	0.91954	20-40th	CKS1B
1	155063748	+	169.651	-0.24111	0.933333	40-60th	EFNA4-EFNA3
1	155127876	+	135.712	-0.531786	0.944388	40-60th	EFNA1
1	155135849	+	239.301	-0.210609	0.96984	80-100th	SLC50A1
1	155135852	+	273.075	-0.311451	0.970067	80-100th	SLC50A1
1	155136292	+	249.89	-0.261948	0.964784	80-100th	SLC50A1
1	155140528	-	357.586	-0.888936	0.969072	80-100th	DPM3
1	155140531	-	1043.04	0.183843	0.992013	80-100th	DPM3
1	155140544	-	207.513	-0.0654418	0.93722	40-60th	DPM3
1	155173238	-	273.425	-0.596325	0.906582	20-40th	KRTCAP2
1	155173257	-	186.07	-0.283678	0.96993	80-100th	KRTCAP2
1	155173275	-	728.084	-0.190684	0.982775	80-100th	KRTCAP2
1	155173284	-	263.263	-0.451328	0.951087	60-80th	KRTCAP2
1	155173296	-	181.118	0.00662603	0.942607	40-60th	KRTCAP2
1	155173302	-	729.751	0.0693038	0.957225	60-80th	KRTCAP2
1	155173306	-	115.745	0.586368	0.989051	80-100th	KRTCAP2
1	155173314	-	263.222	0.378189	0.887676	20-40th	KRTCAP2
1	155209238	+	152.656	-0.622699	0.971194	80-100th	MTX1
1	155241226	-	165.558	-0.167713	0.871705	0-20th	GBA1
1	155241243	-	493.148	-0.0708884	0.940559	40-60th	GBA1
1	155241246	-	176.822	0.440783	0.946257	60-80th	GBA1
1	155241247	-	139.763	0.591201	0.919214	20-40th	GBA1
1	155244627	-	207.207	-0.694086	0.976401	80-100th	GBA1
1	155255483	-	253.519	0.0695952	0.980687	80-100th	ENTREP3
1	155262264	-	253.032	-0.569306	0.892157	20-40th	SCAMP3
1	155262266	-	645.467	-0.414015	0.94052	40-60th	SCAMP3
1	155262274	-	115.072	-0.555535	0.951613	60-80th	SCAMP3
1	155262275	-	525.113	-0.228501	0.91404	20-40th	SCAMP3
1	155262278	-	148.598	-0.258486	0.946237	60-80th	SCAMP3
1	155262360	-	2941.63	-0.0325025	0.896477	20-40th	SCAMP3
1	155308832	+	102.852	0.542706	0.924686	40-60th	FDPS
1	155308838	+	112.888	-0.128044	0.963197	60-80th	FDPS
1	155308852	+	286.235	-0.0614015	0.932371	40-60th	FDPS
1	155308869	+	140.863	0.145166	0.966716	80-100th	FDPS
1	155308873	+	524.445	-0.512652	0.963214	60-80th	FDPS
1	155308914	+	913.365	-0.374032	0.959913	60-80th	FDPS
1	155308917	+	118.005	0.168729	0.932153	40-60th	FDPS
1	155308937	+	2001.01	-0.173677	0.943727	40-60th	FDPS
1	155308944	+	184.934	-0.578827	0.973149	80-100th	FDPS
1	155308947	+	915.904	-0.118255	0.980847	80-100th	FDPS
1	155308948	+	949.341	-0.228302	0.988283	80-100th	FDPS
1	155324519	+	435.106	-0.422244	0.890102	20-40th	RUSC1
1	155689093	+	256.511	-0.27503	0.954976	60-80th	DAP3
1	155689099	+	123.739	-0.309661	0.982935	80-100th	DAP3
1	155911349	-	124.755	-0.408056	0.947846	60-80th	RIT1
1	155911381	-	131.87	0.146107	0.969005	80-100th	RIT1
1	155934407	-	352.596	-0.0223615	0.948936	60-80th	KHDC4
1	155934413	-	253.255	-0.491262	0.927108	40-60th	KHDC4
1	156020909	-	533.259	-0.422625	0.895849	20-40th	SSR2
1	156020967	-	404.176	-0.206666	0.971171	80-100th	SSR2
1	156054802	+	103.382	0.444785	0.977629	80-100th	LAMTOR2
1	156194103	+	596.227	-0.0709203	0.95436	60-80th	SLC25A44
1	156194112	+	222.097	-0.297629	0.949686	60-80th	SLC25A44
1	156194117	+	259.679	-0.470426	0.946792	60-80th	SLC25A44
1	156212989	+	476.338	-0.163551	0.953042	60-80th	PMF1
1	156212993	+	554.933	-0.316304	0.969319	80-100th	PMF1
1	156213001	+	161.367	-0.0393195	0.875953	20-40th	PMF1
1	156213007	+	3761.76	-0.0430743	0.971544	80-100th	PMF1
1	156282807	-	527.621	0.199184	0.896104	20-40th	SMG5
1	156295674	-	396.439	0.142102	0.976371	80-100th	GLMP
1	156295689	-	134.309	-0.315914	0.966068	80-100th	GLMP
1	156338207	-	255.713	-0.432116	0.963939	60-80th	CCT3
1	156338217	-	174.944	-0.669342	0.980469	80-100th	CCT3
1	156338236	-	312.598	-0.0214145	0.948896	60-80th	CCT3
1	156338237	-	166.816	0.493673	0.861883	0-20th	CCT3
1	156338239	-	3882.69	-0.246084	0.977937	80-100th	CCT3
1	156338275	-	338.41	0.110897	0.97998	80-100th	CCT3
1	156338282	-	117.627	0.0449193	0.798373	0-20th	CCT3
1	156338290	-	434.935	-0.254213	0.867726	0-20th	CCT3
1	156338305	-	271.662	-0.46141	0.97179	80-100th	CCT3
1	156601441	-	424.716	-0.257075	0.917292	20-40th	GPATCH4
1	156601450	-	351.597	-0.0409663	0.97342	80-100th	GPATCH4
1	156601469	-	105.56	-0.456435	0.897196	20-40th	GPATCH4
1	156601470	-	344.423	0.808615	0.850259	0-20th	GPATCH4
1	156601479	-	901.784	-0.206641	0.947697	60-80th	GPATCH4
1	156705583	-	104.443	-0.605393	0.966261	80-100th	CRABP2
1	156728433	-	116.714	-0.266629	0.937423	40-60th	ISG20L2
1	156728447	-	135.615	-0.091848	0.953642	60-80th	ISG20L2
1	156728397	-	141.97	-0.233537	0.915416	20-40th	ISG20L2
1	156728705	-	167.641	0.421447	0.976608	80-100th	ISG20L2
1	156728716	-	184.061	0.488095	0.940136	40-60th	ISG20L2
1	156741080	-	176.808	0.477845	0.971377	80-100th	MRPL24
1	156741088	-	888.31	0.115347	0.914955	20-40th	MRPL24
1	156751664	-	669.851	0.502341	0.841026	0-20th	HDGF
1	156751668	-	692.855	0.72096	0.530702	0-20th	HDGF
1	156751670	-	1098.53	0.422949	0.876963	20-40th	HDGF
1	156751674	-	2595.83	0.6834	0.938918	40-60th	HDGF
1	156751680	-	242.097	0.671736	0.91236	20-40th	HDGF
1	156751684	-	112.247	0.204764	0.890667	20-40th	HDGF
1	156751685	-	1139.29	0.501296	0.919763	20-40th	HDGF
1	156751688	-	131.087	0.13099	0.933852	40-60th	HDGF
1	156767539	+	1953.13	-0.253264	0.894966	20-40th	PRCC
1	156767542	+	144.065	-0.274993	0.920502	20-40th	PRCC
1	156814110	-	121.915	-0.444277	0.903427	20-40th	SH2D2A
1	159925478	-	1104.66	-0.853995	0.955268	60-80th	TAGLN2
1	159925507	-	4692.45	-0.500819	0.937182	40-60th	TAGLN2
1	159925510	-	796.367	-0.654188	0.976121	80-100th	TAGLN2
1	159925543	-	109.127	-0.649068	0.986692	80-100th	TAGLN2
1	160031960	-	104.724	0.390967	0.92	20-40th	PIGM
1	160098606	-	187.178	-0.00434679	0.882353	20-40th	IGSF8
1	160098619	-	138.82	-0.13688	0.945423	60-80th	IGSF8
1	160262487	-	155.8	-0.266632	0.982737	80-100th	DCAF8
1	160262451	-	525.736	0.22283	0.858355	0-20th	DCAF8
1	160262549	-	370.284	-0.184037	0.91441	20-40th	DCAF8
1	160285130	-	909.756	-0.18382	0.950728	60-80th	ENSG00000258465
1	160285134	-	111.968	-0.867803	0.928169	40-60th	PEX19
1	160285141	-	512.583	-0.183691	0.959735	60-80th	PEX19
1	160285146	-	443.44	-0.0941952	0.961373	60-80th	PEX19
1	160343265	-	312.49	0.233765	0.962298	60-80th	COPA
1	160343386	+	388.785	-0.409926	0.933464	40-60th	NCSTN
1	161021152	-	222.248	-0.147833	0.951691	60-80th	F11R
1	161045894	-	108.788	-0.162324	0.874768	0-20th	USF1
1	161045896	-	423.234	0.2947	0.871833	0-20th	USF1
1	161118037	-	1246.78	-0.0373344	0.983736	80-100th	PFDN2
1	161118040	-	295.009	-0.194174	0.985795	80-100th	PFDN2
1	161118046	-	408.632	0.144457	0.966981	80-100th	PFDN2
1	161118105	+	208.435	-0.0494986	0.93794	40-60th	NIT1
1	161118129	+	300.499	-0.52649	0.973921	80-100th	NIT1
1	161153995	+	298.059	0.701185	0.880821	20-40th	UFC1
1	161177501	-	368.164	0.194152	0.966292	80-100th	B4GALT3
1	161202367	+	1673.32	-0.123276	0.954785	60-80th	NDUFS2
1	161226060	+	339.449	0.163349	0.971656	80-100th	TOMM40L
1	161226063	+	163.983	0.434657	0.9081	20-40th	TOMM40L
1	161314381	+	11329.9	-0.484981	0.956904	60-80th	SDHC
1	161314391	+	2142.92	-0.381963	0.984789	80-100th	SDHC
1	161314393	+	152.699	-0.511822	0.955357	60-80th	SDHC
1	161314398	+	379.434	-0.129821	0.971347	80-100th	SDHC
1	161314399	+	554.775	-0.428444	0.985577	80-100th	SDHC
1	161314403	+	194.018	0.633003	0.668367	0-20th	SDHC
1	161749773	+	134.441	-0.165459	0.951613	60-80th	DUSP12
1	161749802	+	244.016	0.0612468	0.920455	20-40th	DUSP12
1	161766261	+	131.507	-0.0218579	0.943311	40-60th	ATF6
1	161766320	+	328.644	0.181313	0.965537	80-100th	ATF6
1	161766322	+	258.321	-0.239488	0.957895	60-80th	ATF6
1	161766324	+	436.781	0.105807	0.954255	60-80th	ATF6
1	162497831	+	149.259	0.328359	0.974619	80-100th	UHMK1
1	162497849	+	114.67	0.423479	0.899441	20-40th	UHMK1
1	163321735	-	170.653	0.178538	0.95904	60-80th	RGS5
1	163321954	+	158.878	-0.564041	0.94319	40-60th	NUF2
1	163321957	+	258.407	-0.893753	0.958771	60-80th	NUF2
1	163321967	+	149.84	0.315297	0.899168	20-40th	NUF2
1	163322008	+	155.464	0.157356	0.90665	20-40th	NUF2
1	164559184	+	462.325	0.0724755	0.954727	60-80th	PBX1
1	165631209	+	1093	-0.361367	0.990619	80-100th	MGST3
1	165631224	+	698.976	-0.554907	0.946809	60-80th	MGST3
1	165631239	+	165.342	-0.590292	0.979468	80-100th	MGST3
1	165631243	+	742.31	-0.286971	0.951019	60-80th	MGST3
1	165631245	+	343.47	-0.379854	0.965414	80-100th	MGST3
1	165631257	+	251.248	-0.439505	0.963757	60-80th	MGST3
1	165631273	+	215.321	-0.592416	0.985206	80-100th	MGST3
1	165698513	-	266.21	-0.464715	0.949986	60-80th	ALDH9A1
1	165698558	-	307.977	-0.112148	0.922243	40-60th	ALDH9A1
1	165698562	-	1638.07	-0.397891	0.9531	60-80th	ALDH9A1
1	165768854	-	624.7	-0.222795	0.96002	60-80th	TMCO1
1	165768868	-	3924.74	0.216107	0.964985	80-100th	TMCO1
1	165768888	-	1104.87	0.234179	0.950441	60-80th	TMCO1
1	165768889	-	781.93	0.407811	0.947021	60-80th	TMCO1
1	165768895	-	101.487	-0.110798	0.927074	40-60th	TMCO1
1	165827525	+	213.584	-0.728716	1	80-100th	UCK2
1	165827555	+	250.056	-0.0278715	0.984	80-100th	UCK2
1	165827558	+	306.777	-0.477456	0.968153	80-100th	UCK2
1	165827584	+	173.652	-0.019964	0.93318	40-60th	UCK2
1	165827587	+	152.64	0.0799342	0.978648	80-100th	UCK2
1	165827616	+	968.972	0.305565	0.924868	40-60th	UCK2
1	165827639	+	108.581	0.710066	0.559727	0-20th	UCK2
1	165827644	+	142.881	0.803137	0.910891	20-40th	UCK2
1	166839475	+	330.74	0.460065	0.981707	80-100th	POGK
1	167220886	+	460.459	0.187231	0.957692	60-80th	POU2F1
1	167220891	+	276.583	-0.0824616	0.914634	20-40th	POU2F1
1	167553762	-	1265.85	-0.19946	0.967733	80-100th	CREG1
1	167935995	-	1055.44	-0.423563	0.903226	20-40th	MPC2
1	167936008	-	203.656	0.204302	0.968302	80-100th	MPC2
1	167936696	+	189.301	-0.357314	0.919962	20-40th	DCAF6
1	168178962	+	670.46	0.1622	0.93389	40-60th	TIPRL
1	168179012	+	162.178	-0.242553	0.902516	20-40th	TIPRL
1	168179044	+	111.969	-0.64192	0.958478	60-80th	TIPRL
1	168226004	+	335.548	-0.309446	0.964623	60-80th	SFT2D2
1	168226010	+	137.356	1.37839	0.89557	20-40th	SFT2D2
1	168226011	+	289.721	0.163924	0.964126	60-80th	SFT2D2
1	169106323	+	625.394	0.12838	0.917742	20-40th	ATP1B1
1	169106690	+	181.454	0.2142	0.955115	60-80th	ATP1B1
1	169427462	-	198.444	-0.0807074	0.877061	20-40th	CCDC181
1	169795040	+	485.82	-0.0971494	0.910777	20-40th	FIRRM
1	170074652	-	181.066	-0.352517	0.948023	60-80th	KIFAP3
1	171485508	+	259.414	-0.084067	0.94152	40-60th	PRRC2C
1	171485511	+	155.65	0.276405	0.918288	20-40th	PRRC2C
1	171485533	+	742.539	-0.280589	0.971891	80-100th	PRRC2C
1	171485571	+	148.107	0.366919	0.890459	20-40th	PRRC2C
1	171781674	+	176.752	0.301391	0.910125	20-40th	METTL13
1	172444069	-	255.332	-0.314883	0.876692	20-40th	PIGC
1	172444099	-	152.178	-0.110654	0.93913	40-60th	PIGC
1	173477284	+	136.558	-0.759399	0.965517	80-100th	PRDX6
1	173477310	+	973.345	-0.597886	0.971038	80-100th	PRDX6
1	173477328	+	153.211	-0.590387	0.948276	60-80th	PRDX6
1	173477330	+	445.675	-0.702496	0.96728	80-100th	PRDX6
1	173477346	+	2276.99	-0.0699432	0.984144	80-100th	PRDX6
1	173477352	+	186.678	-0.0503306	0.913774	20-40th	PRDX6
1	173477386	+	3286.09	-0.351264	0.993881	80-100th	PRDX6
1	173824581	+	144.567	-0.0162833	0.960511	60-80th	DARS2
1	173824647	+	111.194	0.129053	0.912022	20-40th	DARS2
1	173868380	+	153.255	-0.221651	0.922261	40-60th	ZBTB37
1	174159520	+	181.271	-0.18875	0.971944	80-100th	RABGAP1L
1	174999435	+	130.48	-0.16892	0.964396	60-80th	CACYBP
1	174999462	+	172.077	-0.113145	0.936413	40-60th	CACYBP
1	174999995	+	251.375	0.465378	0.876143	20-40th	CACYBP
1	175000033	+	136.808	-0.633638	0.971671	80-100th	CACYBP
1	175000042	+	304.804	-0.110488	0.910321	20-40th	CACYBP
1	175000087	+	184.207	-0.113401	0.946269	60-80th	CACYBP
1	175023418	-	318.861	-0.592266	0.972644	80-100th	MRPS14
1	175023425	-	3342.12	-0.249866	0.959581	60-80th	MRPS14
1	175023435	-	563.487	-0.478338	0.969789	80-100th	MRPS14
1	178725244	+	159.197	-0.616118	0.959596	60-80th	RALGPS2
1	179082076	+	120.178	0.373819	0.727422	0-20th	TOR3A
1	179293802	+	242.056	-0.772653	0.963532	60-80th	SOAT1
1	179293807	+	133.03	-0.834521	0.980519	80-100th	SOAT1
1	179293836	+	387.398	-0.114033	0.903904	20-40th	SOAT1
1	179877776	-	322.553	-0.228176	0.96962	80-100th	TOR1AIP2
1	179877803	-	4753.34	0.489403	0.93395	40-60th	TOR1AIP2
1	179877805	-	116.295	0.527313	0.945946	60-80th	TOR1AIP2
1	179882297	+	328.861	-0.229787	0.884848	20-40th	TOR1AIP1
1	179882813	+	395.318	0.0151349	0.972516	80-100th	TOR1AIP1
1	179882816	+	187.246	-0.0671649	0.87907	20-40th	TOR1AIP1
1	179954810	+	313.926	0.115858	0.935929	40-60th	CEP350
1	180154869	+	177.355	-0.269008	0.957143	60-80th	QSOX1
1	180502577	-	106.67	-0.0470774	0.925234	40-60th	ACBD6
1	181022869	-	104.393	0.0487828	0.924658	40-60th	STX6
1	182391341	-	161.481	-0.421918	0.900552	20-40th	GLUL
1	182391790	-	1765.02	-1.18447	0.901709	20-40th	GLUL
1	182839332	+	289.795	-0.109761	0.996183	80-100th	DHX9
1	182839350	+	3691.35	-0.0865352	0.953572	60-80th	DHX9
1	182839718	+	105.371	0.302916	0.92517	40-60th	DHX9
1	183635734	-	358.59	-0.434314	0.880694	20-40th	ARPC5
1	183635745	-	181.775	-0.145007	0.94847	60-80th	ARPC5
1	183635754	-	316.144	0.122497	0.92523	40-60th	ARPC5
1	183635768	-	238.794	-0.376723	0.940828	40-60th	ARPC5
1	183635783	-	593.143	0.023323	0.920074	20-40th	ARPC5
1	183635803	-	172.745	0.106059	0.984632	80-100th	ARPC5
1	184051730	+	212.657	-0.211701	0.988673	80-100th	TSEN15
1	184051733	+	151.211	0.359334	0.955385	60-80th	TSEN15
1	184754786	-	132.226	0.0908871	0.907514	20-40th	EDEM3
1	185045489	+	251.016	-0.202899	0.910484	20-40th	RNF2
1	185045558	+	640.038	0.171119	0.963436	60-80th	RNF2
1	185045560	+	103.74	0.100891	0.896875	20-40th	RNF2
1	185156951	-	319.985	0.177666	0.962825	60-80th	TRMT1L
1	185317243	-	1311.34	0.0944913	0.926997	40-60th	IVNS1ABP
1	186375254	-	968.807	-0.0396218	0.956908	60-80th	TPR
1	186375276	-	107.875	-0.552454	0.976087	80-100th	TPR
1	186375885	+	107.048	0.0993109	0.946274	60-80th	ODR4
1	186828961	+	114.088	-0.0255639	0.933333	40-60th	PLA2G4A
1	192809041	+	343.429	0.0287235	0.935163	40-60th	RGS2
1	193059336	-	453.216	0.654141	0.953714	60-80th	UCHL5
1	193059338	-	392.801	0.631229	0.943623	40-60th	UCHL5
1	193059387	-	124.165	0.191007	0.921309	20-40th	UCHL5
1	193059510	-	112.285	0.126751	0.969388	80-100th	UCHL5
1	193059612	+	308.599	0.370097	0.960674	60-80th	RO60
1	193059625	+	101.956	0.372946	0.964856	80-100th	RO60
1	193059637	+	140.898	0.501573	0.910448	20-40th	RO60
1	193059650	+	717.497	-0.059364	0.938453	40-60th	RO60
1	193105382	-	126.31	-0.00467609	0.931264	40-60th	GLRX2
1	193105399	-	251.931	0.175702	0.985337	80-100th	GLRX2
1	193105414	-	631.554	0.00457925	0.960857	60-80th	GLRX2
1	193105430	-	144.037	0.423507	0.97541	80-100th	GLRX2
1	193122034	+	453.629	0.0341586	0.963824	60-80th	CDC73
1	197146669	-	627.656	0.240136	0.977921	80-100th	ASPM
1	198156998	+	218.863	0.408506	0.930328	40-60th	NEK7
1	198157036	+	112.3	0.644487	0.943396	40-60th	NEK7
1	200410026	-	262.331	0.0554582	0.956178	60-80th	ZNF281
1	200410036	-	101.727	0.55248	0.913761	20-40th	ZNF281
1	200410058	-	272.709	0.393138	0.941476	40-60th	ZNF281
1	200620751	-	152.319	0.134777	0.96325	60-80th	KIF14
1	201154478	-	144.303	0.490366	0.966675	80-100th	TMEM9
1	201154480	-	126.799	0.0594776	0.979294	80-100th	TMEM9
1	201154501	-	102.769	-0.589474	0.980453	80-100th	TMEM9
1	201829160	+	142.405	0.0579883	0.96823	80-100th	IPO9
1	201829203	+	202.779	0.628217	0.803452	0-20th	IPO9
1	201829205	+	271.734	0.625433	0.847584	0-20th	IPO9
1	201955491	+	115.579	-0.268959	0.979535	80-100th	TIMM17A
1	201955503	+	2305	-0.372269	0.983215	80-100th	TIMM17A
1	201955506	+	1813.25	-0.245606	0.944878	40-60th	TIMM17A
1	201955515	+	711.961	-0.630646	0.929423	40-60th	TIMM17A
1	201955520	+	174.97	-0.72497	0.922929	40-60th	TIMM17A
1	201982649	+	167.022	-0.0128804	0.958724	60-80th	RNPEP
1	201982652	+	158.035	0.926733	0.980456	80-100th	RNPEP
1	202341966	-	203.815	-0.481315	0.944747	40-60th	UBE2T
1	202808419	-	191.89	0.0286729	0.96347	60-80th	KDM5B
1	202808439	-	105.607	0.382428	0.859155	0-20th	KDM5B
1	202889149	-	146.207	-0.303761	0.973123	80-100th	RABIF
1	202927209	-	280.116	0.152132	0.937337	40-60th	KLHL12
1	202958312	-	459.334	0.0760378	0.980279	80-100th	ADIPOR1
1	202967255	-	123.964	0.207269	0.92122	20-40th	CYB5R1
1	203305519	+	322.095	-0.57188	0.880293	20-40th	BTG2
1	203861581	+	378.113	-0.40209	0.974651	80-100th	SNRPE
1	203861583	+	222.261	0.0661429	0.929967	40-60th	SNRPE
1	203861603	+	10142.3	-0.0517693	0.951404	60-80th	SNRPE
1	203861610	+	1140.9	-0.449363	0.876298	20-40th	SNRPE
1	203861611	+	461.943	-0.814439	0.866417	0-20th	SNRPE
1	203861621	+	1020.59	-0.718194	0.96938	80-100th	SNRPE
1	203861627	+	2115.2	-0.371178	0.982974	80-100th	SNRPE
1	203861650	+	472.203	0.0991926	0.944304	40-60th	SNRPE
1	203861652	+	152.005	-0.328839	0.872711	0-20th	SNRPE
1	203861847	+	172.494	0.288655	0.73453	0-20th	SNRPE
1	204411817	-	2941.74	0.443269	0.90877	20-40th	PPP1R15B
1	204516406	+	460.186	0.482157	0.95	60-80th	MDM4
1	204516409	+	464.312	0.114131	0.929758	40-60th	MDM4
1	205121975	-	1097.26	0.0448218	0.947778	60-80th	RBBP5
1	205122003	-	253.108	0.469549	0.909976	20-40th	RBBP5
1	205750178	-	3385.96	-0.246906	0.902154	20-40th	NUCKS1
1	205750182	-	9831.72	-0.232218	0.970798	80-100th	NUCKS1
1	205750186	-	225.536	-0.00357539	0.929412	40-60th	NUCKS1
1	205750202	-	138.022	0.285391	0.923739	40-60th	NUCKS1
1	205750218	-	161.815	0.0614381	0.848485	0-20th	NUCKS1
1	205813160	-	197.7	0.435783	0.948925	60-80th	SLC41A1
1	205813188	-	179.931	0.356542	0.952218	60-80th	SLC41A1
1	205813198	-	491.479	0.0449596	0.956888	60-80th	SLC41A1
1	206635536	+	202.973	-0.244587	0.942601	40-60th	DYRK3
1	206635553	+	118.958	-0.175194	0.917362	20-40th	DYRK3
1	207053248	+	100.258	0.300398	0.953488	60-80th	PFKFB2
1	207321647	+	168.706	0.614961	0.949367	60-80th	CD55
1	207321658	+	119.912	0.475138	0.940828	40-60th	CD55
1	207321684	+	331.847	0.0788782	0.957476	60-80th	CD55
1	207752066	+	286.297	-0.119495	0.963889	60-80th	CD46
1	207752072	+	227.416	0.00410926	0.932961	40-60th	CD46
1	207752083	+	273.155	-0.113071	0.964874	80-100th	CD46
1	207752086	+	739.652	-0.254059	0.865908	0-20th	CD46
1	207752109	+	351.864	0.84418	0.787608	0-20th	CD46
1	209827974	+	113.664	-1.29818	0.891892	20-40th	UTP25
1	211675591	-	240.14	-0.846679	0.954397	60-80th	NEK2
1	211675621	-	642.913	0.0460831	0.983728	80-100th	NEK2
1	211830763	-	192.709	0.691094	0.927835	40-60th	LPGAT1
1	212035542	-	194.491	-0.22025	0.966387	80-100th	INTS7
1	212035544	-	155.915	-0.102223	0.93617	40-60th	INTS7
1	212035769	+	354.419	-0.679367	0.914082	20-40th	DTL
1	212035771	+	114.699	-0.578068	0.946798	60-80th	DTL
1	212035780	+	305.384	-0.467199	0.859403	0-20th	DTL
1	212035791	+	243.309	0.197153	0.89677	20-40th	DTL
1	212035793	+	1390.95	0.587757	0.902624	20-40th	DTL
1	212608761	+	522.557	0.301645	0.664557	0-20th	ATF3
1	212791777	-	4427.14	0.0281701	0.952629	60-80th	NSL1
1	212791779	-	1448.28	-0.451882	0.953871	60-80th	NSL1
1	212791793	-	181.282	-0.235858	0.979699	80-100th	NSL1
1	212858275	+	208.552	0.53811	0.95941	60-80th	FLVCR1
1	212858277	+	282.213	0.769475	0.923077	40-60th	FLVCR1
1	212858283	+	441.051	0.793513	0.943089	40-60th	FLVCR1
1	212950594	+	183.298	0.331949	0.907591	20-40th	VASH2
1	213015744	-	108.141	0.155045	0.875556	0-20th	ANGEL2
1	213015776	-	118.608	-0.0230854	0.894843	20-40th	ANGEL2
1	213015867	-	173.331	-0.174829	0.952663	60-80th	ANGEL2
1	213015872	-	108.78	-0.0601954	0.950423	60-80th	ANGEL2
1	214603195	+	319.334	-0.454827	0.974404	80-100th	CENPF
1	214603214	+	289.495	-0.684692	0.948077	60-80th	CENPF
1	214603233	+	171.8	-0.163219	0.943118	40-60th	CENPF
1	214603243	+	510.75	-0.253869	0.959184	60-80th	CENPF
1	215567304	+	370.456	0.377109	0.911464	20-40th	KCTD3
1	215567375	+	177.132	0.412844	0.971519	80-100th	KCTD3
1	217631067	-	275.533	0.4449	0.912396	20-40th	GPATCH2
1	217631072	-	174.677	0.0570423	0.938804	40-60th	GPATCH2
1	218285293	+	1920.68	0.0791222	0.961243	60-80th	RRP15
1	218285311	+	949.356	0.355086	0.818035	0-20th	RRP15
1	218285313	+	162.233	0.756304	0.875676	0-20th	RRP15
1	219173850	+	126.584	0.240523	0.973054	80-100th	LYPLAL1
1	219173869	+	360.43	0.0842507	0.939398	40-60th	LYPLAL1
1	219173878	+	530.874	-0.228844	0.947269	60-80th	LYPLAL1
1	219173884	+	142.349	-0.36098	0.983906	80-100th	LYPLAL1
1	219613105	-	164.506	0.442468	0.919811	20-40th	ZC3H11B
1	220046418	-	127.689	-0.616123	0.949476	60-80th	EPRS1
1	220046440	-	1236.42	-0.187932	0.923572	40-60th	EPRS1
1	220046468	-	328.62	-1.00952	0.982262	80-100th	EPRS1
1	220046477	-	412.263	-0.446182	0.959099	60-80th	EPRS1
1	220046483	-	208.261	-0.0332178	0.96338	60-80th	EPRS1
1	220046504	-	147.105	-0.451999	0.853293	0-20th	EPRS1
1	220046508	-	165.326	-0.491018	0.963047	60-80th	EPRS1
1	220046530	-	216.958	-0.536745	0.950151	60-80th	EPRS1
1	220089843	-	163.144	-0.310338	0.971178	80-100th	BPNT1
1	220089761	-	260.504	-0.776273	0.915328	20-40th	BPNT1
1	220089788	-	1348.53	0.428663	0.926214	40-60th	BPNT1
1	220089792	-	233.134	-0.0912195	0.933146	40-60th	BPNT1
1	220089797	-	650.233	0.296938	0.846374	0-20th	BPNT1
1	220089806	-	306.126	-0.271782	0.962712	60-80th	BPNT1
1	220089824	-	271.163	-0.623832	0.966884	80-100th	BPNT1
1	220094132	+	364.142	-0.230105	0.972782	80-100th	IARS2
1	220748323	+	285.35	-0.256792	0.947333	60-80th	MTARC2
1	220786873	+	277.644	-0.24234	0.948936	60-80th	MTARC1
1	222618086	+	122.992	-0.251725	1	80-100th	MIA3
1	222618098	+	240.089	0.0421822	0.850515	0-20th	MIA3
1	222618103	+	168.056	0.047308	0.991713	80-100th	MIA3
1	222618106	+	351.586	-0.16768	0.952255	60-80th	MIA3
1	222712490	-	157.323	0.303001	0.952906	60-80th	AIDA
1	222712548	+	142.334	-0.29364	0.941406	40-60th	BROX
1	222712564	+	633.95	-0.163912	0.873913	0-20th	BROX
1	222712588	+	237.864	-0.309306	0.947531	60-80th	BROX
1	223845954	-	120.264	0.0983571	0.923077	40-60th	TP53BP2
1	224114111	+	767.732	0.6465	0.920116	20-40th	FBXO28
1	224114115	+	190.216	0.959376	0.930435	40-60th	FBXO28
1	224114116	+	408.43	0.551596	0.973535	80-100th	FBXO28
1	224114119	+	488.853	0.44828	0.744186	0-20th	FBXO28
1	224183240	+	2920.04	-1.17044	0.974975	80-100th	DEGS1
1	224183243	+	696.534	-1.05398	0.925159	40-60th	DEGS1
1	224183245	+	144.457	-1.37071	0.914474	20-40th	DEGS1
1	224330138	-	288.189	-0.153755	0.95983	60-80th	NVL
1	224330139	-	1670.2	-0.0212119	0.879723	20-40th	NVL
1	224330168	-	251.75	0.185989	0.963768	60-80th	NVL
1	224356860	+	240.471	-0.440527	0.976311	80-100th	CNIH4
1	224356879	+	696.847	-0.305564	0.98125	80-100th	CNIH4
1	224434797	-	1444.14	0.0766161	0.9375	40-60th	WDR26
1	224929678	+	114.934	0.224445	0.965101	80-100th	DNAH14
1	225428038	-	1234.96	0.635784	0.983029	80-100th	LBR
1	225428053	-	387.905	0.209388	0.897758	20-40th	LBR
1	225428066	-	551.104	0.070818	0.961122	60-80th	LBR
1	225428088	-	221.619	0.312605	0.938272	40-60th	LBR
1	225653100	-	340.335	0.362398	0.932914	40-60th	ENAH
1	225653122	-	299.529	0.14205	0.962536	60-80th	ENAH
1	225777822	+	194.85	0.338614	0.936585	40-60th	SRP9
1	225777832	+	1784.67	0.13129	0.97731	80-100th	SRP9
1	225777849	+	154.814	-1.15209	0.967267	80-100th	SRP9
1	225882374	-	156.446	0.630677	0.942308	40-60th	TMEM63A
1	225924169	-	257.549	0.404283	0.969735	80-100th	PYCR2
1	225924245	-	112.868	0.121712	0.932563	40-60th	PYCR2
1	225924250	-	319.097	0.00479536	0.956681	60-80th	PYCR2
1	225924266	-	258.986	0.396622	0.950858	60-80th	ENSG00000255835
1	225924278	-	482.655	0.0841826	0.957521	60-80th	ENSG00000255835
1	225924280	-	124.238	0.042418	0.918434	20-40th	ENSG00000255835
1	225924282	-	449.44	-0.113156	0.969573	80-100th	ENSG00000255835
1	225999322	-	430.7	0.203207	0.921514	40-60th	SDE2
1	225999343	-	763.07	-0.125793	0.903607	20-40th	SDE2
1	226062714	+	1388.58	0.224147	0.973559	80-100th	H3-3A
1	226062721	+	31450.8	-0.590593	0.933387	40-60th	H3-3A
1	226062722	+	334.504	-0.931315	0.71875	0-20th	H3-3A
1	226186720	-	383.9	0.365413	0.954268	60-80th	ACBD3
1	226186734	-	175.099	0.25101	0.989418	80-100th	ACBD3
1	226186741	-	688.011	-0.0612761	0.981315	80-100th	ACBD3
1	226309142	-	110.057	0.988342	0.817857	0-20th	LIN9
1	226309162	-	105.538	0.876408	0.890647	20-40th	LIN9
1	226309163	-	365.07	0.608099	0.878622	20-40th	LIN9
1	226408031	-	112.597	-0.180227	0.944444	40-60th	PARP1
1	226408082	-	1037.54	0.354334	0.945038	60-80th	PARP1
1	226408085	-	1879.56	0.409338	0.986199	80-100th	PARP1
1	226408089	-	515.655	0.666306	0.953316	60-80th	PARP1
1	226408090	-	9053.96	0.838171	0.949856	60-80th	PARP1
1	226408093	-	3635.19	0.465142	0.980767	80-100th	PARP1
1	226408096	-	1726.24	0.512252	0.987804	80-100th	PARP1
1	226408100	-	137.183	0.107223	0.957663	60-80th	PARP1
1	226870620	+	390.996	0.321204	0.9374	40-60th	PSEN2
1	226940294	+	404.44	0.846335	0.956102	60-80th	COQ8A
1	226940298	+	507.164	0.471204	0.96981	80-100th	COQ8A
1	227318490	-	123.327	0.451395	0.920398	20-40th	CDC42BPA
1	227318492	-	554.456	0.471925	0.952571	60-80th	CDC42BPA
1	227735239	-	118.109	0.131685	0.945344	60-80th	JMJD4
1	227735303	-	340.735	-0.222014	0.940917	40-60th	JMJD4
1	227735435	+	563.408	0.000539904	0.967073	80-100th	SNAP47
1	228082708	+	5639.48	-0.146651	0.961698	60-80th	ARF1
1	228082717	+	3843.59	0.143438	0.967018	80-100th	ARF1
1	228082727	+	1761.76	0.0450755	0.970293	80-100th	ARF1
1	228082730	+	3799.57	0.456715	0.818775	0-20th	ARF1
1	228082731	+	235.559	0.156338	0.680662	0-20th	ARF1
1	228082732	+	220.6	0.312045	0.701016	0-20th	ARF1
1	228082733	+	206.663	0.610809	0.809179	0-20th	ARF1
1	228082736	+	712.698	0.0901281	0.571946	0-20th	ARF1
1	228082756	+	126.17	0.212844	0.908602	20-40th	ARF1
1	228103270	-	274.567	-0.358747	0.935076	40-60th	C1orf35
1	228103301	-	313.498	-0.161184	0.86556	0-20th	C1orf35
1	228109281	-	204.396	-0.513441	0.982127	80-100th	MRPL55
1	228109273	-	163.914	-0.406653	0.984113	80-100th	MRPL55
1	228109261	-	161.184	-0.866835	0.948359	60-80th	MRPL55
1	228109299	-	2267.05	-0.0443506	0.955459	60-80th	MRPL55
1	228109323	-	263.415	-0.382927	0.969325	80-100th	MRPL55
1	228140279	+	255.958	0.133765	0.941543	40-60th	GUK1
1	228165804	+	800.677	0.45503	0.955236	60-80th	IBA57
1	228406852	-	106.451	-0.0873858	0.952381	60-80th	TRIM11
1	228457901	-	116.712	-0.601286	0.882576	20-40th	H2AC25
1	229342504	-	188.166	0.208484	0.978648	80-100th	CCSAP
1	229508298	-	717.2	0.446691	0.971601	80-100th	NUP133
1	229508305	-	106.373	0.0945144	0.836478	0-20th	NUP133
1	229508310	-	156.017	0.0849068	0.991935	80-100th	NUP133
1	229508323	-	412.262	0.651318	0.951689	60-80th	NUP133
1	229508331	-	444.994	-0.325151	0.966549	80-100th	NUP133
1	229508343	-	343.753	-0.0609397	0.984121	80-100th	NUP133
1	229508356	-	241.519	0.143864	0.98419	80-100th	NUP133
1	229508371	-	143.161	0.360299	0.940762	40-60th	NUP133
1	229626056	-	172.587	1.07244	0.923977	40-60th	TAF5L
1	229626204	+	189.233	0.352228	0.954802	60-80th	URB2
1	229626225	+	103.708	-0.165458	0.932203	40-60th	URB2
1	230067235	+	125.641	-0.58682	0.983333	80-100th	GALNT2
1	230067238	+	549.457	-0.211178	0.951872	60-80th	GALNT2
1	230642481	+	226.379	-0.356799	0.926786	40-60th	COG2
1	230868521	-	230.394	-0.642031	0.860274	0-20th	C1orf198
1	230978847	-	140.777	-0.0825644	0.95585	60-80th	TTC13
1	230979070	+	134.878	0.0493745	0.903658	20-40th	ARV1
1	230979072	+	168.046	0.534383	0.951401	60-80th	ARV1
1	230979081	+	149.444	-0.0289356	0.931198	40-60th	ARV1
1	230979089	+	135.641	-0.245238	0.92	20-40th	ARV1
1	230979094	+	1030.09	-0.162587	0.94533	60-80th	ARV1
1	231241144	-	902.184	-0.0293236	0.963306	60-80th	C1orf131
1	231337852	-	1198.16	0.109253	0.942317	40-60th	EXOC8
1	231338293	+	745.206	-0.413782	0.94791	60-80th	SPRTN
1	231422285	-	105.249	0.462757	0.940678	40-60th	EGLN1
1	231528599	-	135.089	-0.305814	0.954545	60-80th	ENSG00000287856
1	231528653	+	102.654	-0.0836818	0.918192	20-40th	TSNAX-DISC1
1	231528658	+	108.677	-0.482843	0.841063	0-20th	TSNAX-DISC1
1	231528663	+	111.496	0.712919	0.823096	0-20th	TSNAX
1	231528665	+	732.297	0.395044	0.970258	80-100th	TSNAX
1	231528675	+	1501.35	0.212429	0.927752	40-60th	TSNAX
1	231528685	+	147.898	0.127598	0.907591	20-40th	TSNAX
1	231528700	+	366.3	0.0925875	0.942623	40-60th	TSNAX
1	231528715	+	124.777	-0.338294	0.934406	40-60th	TSNAX
1	234373456	+	1338.02	0.164284	0.910835	20-40th	COA6
1	234373460	+	168.758	0.43297	0.939525	40-60th	COA6
1	234373465	+	147.002	0.357471	0.934365	40-60th	COA6
1	234373486	+	320.61	0.189586	0.823841	0-20th	COA6
1	234610176	-	261.403	0.353845	0.947185	60-80th	IRF2BP2
1	234610184	-	123.065	0.461437	0.878788	20-40th	IRF2BP2
1	235128871	-	1446.06	-0.179274	0.927738	40-60th	TOMM20
1	235161242	-	181.789	-0.182731	0.891949	20-40th	RBM34
1	235161256	-	304.601	-0.704358	0.955822	60-80th	RBM34
1	235328168	-	602.74	0.23023	0.931452	40-60th	ARID4B
1	235328181	-	199.275	0.554723	0.900826	20-40th	ARID4B
1	235328570	+	2961.13	0.0897877	0.952879	60-80th	ENSG00000285053
1	235328589	+	443.991	0.261134	0.952117	60-80th	GGPS1
1	235367430	+	450.601	-0.0465217	0.975825	80-100th	TBCE
1	235367438	+	195.251	0.342317	0.975989	80-100th	TBCE
1	235367455	+	661.83	-0.269083	0.93653	40-60th	TBCE
1	235504387	-	119.113	-0.0441367	0.976471	80-100th	B3GALNT2
1	236065090	-	502.761	-0.137473	0.944328	40-60th	NID1
1	236065141	-	288.937	-0.256652	0.936275	40-60th	NID1
1	236281958	-	233.982	-0.214729	0.922173	40-60th	ERO1B
1	236604485	-	123.53	-0.0680705	0.966387	80-100th	HEATR1
1	236604503	-	114.289	-0.253423	0.761057	0-20th	HEATR1
1	236604516	-	823.32	-0.328767	0.941638	40-60th	HEATR1
1	236604528	-	218.728	0.060734	0.909753	20-40th	HEATR1
1	236604538	-	134.251	0.0865823	0.940104	40-60th	HEATR1
1	236604562	-	575.132	-0.13452	0.907759	20-40th	HEATR1
1	236795281	+	144.71	0.612935	0.963542	60-80th	MTR
1	236795292	+	826.638	0.407025	0.968676	80-100th	MTR
1	236795310	+	583.06	0.0452634	0.949755	60-80th	MTR
1	236795312	+	566.478	-0.238104	0.955789	60-80th	MTR
1	236795319	+	222.682	0.0623373	0.900518	20-40th	MTR
1	241519711	-	247.489	-0.857259	0.926175	40-60th	FH
1	241519718	-	192.679	-0.146802	0.944206	40-60th	FH
1	241519722	-	729.39	0.246692	0.935743	40-60th	FH
1	241519725	-	332.525	-0.808439	0.984038	80-100th	FH
1	241519738	-	205.654	0.180064	0.957205	60-80th	FH
1	241519749	-	558.563	-0.103493	0.974322	80-100th	FH
1	241519751	-	273.479	-0.261523	0.981731	80-100th	FH
1	241640369	-	144.552	-0.0970955	0.925307	40-60th	OPN3
1	241848191	+	527.14	0.757208	0.945344	60-80th	EXO1
1	241848204	+	684.231	-0.123295	0.979579	80-100th	EXO1
1	241848223	+	247.899	-0.377096	0.945705	60-80th	EXO1
1	241848227	+	252.344	0.297872	0.914399	20-40th	EXO1
1	243255203	-	151.948	-0.206041	0.91866	20-40th	CEP170
1	243255261	-	187.341	0.311036	0.955128	60-80th	CEP170
1	244451876	-	174.896	-0.42168	0.902113	20-40th	ADSS2
1	244451881	-	729.853	-0.29174	0.920634	20-40th	ADSS2
1	244451886	-	325.821	-0.0926236	0.823113	0-20th	ADSS2
1	244451903	-	264.72	0.389839	0.805217	0-20th	ADSS2
1	244653073	+	116.331	-0.0975468	0.878788	20-40th	DESI2
1	244653078	+	100.689	0.0824511	0.954545	60-80th	DESI2
1	244653087	+	371.691	0.415402	0.975309	80-100th	DESI2
1	244653104	+	271.971	0.521495	0.958498	60-80th	DESI2
1	244653126	+	303.404	-0.304053	0.967273	80-100th	DESI2
1	244835686	+	121.295	-0.752059	0.9375	40-60th	COX20
1	244862970	-	218.102	0.101095	0.88959	20-40th	HNRNPU
1	244862998	-	128.938	-0.358727	0.834951	0-20th	HNRNPU
1	244863000	-	260.617	-0.00469687	0.941176	40-60th	HNRNPU
1	244864476	-	736.477	0.275846	0.632479	0-20th	HNRNPU
1	244864477	-	1116.47	0.0445525	0.479862	0-20th	HNRNPU
1	244864480	-	803.182	-0.0469554	0.922261	40-60th	HNRNPU
1	244864481	-	400.143	0.430486	0.531511	0-20th	HNRNPU
1	244864482	-	2597.75	0.0449932	0.611958	0-20th	HNRNPU
1	244864491	-	2138.06	0.105371	0.93571	40-60th	HNRNPU
1	244864512	-	169.31	-0.00849769	0.923188	40-60th	HNRNPU
1	244864517	-	2560.62	0.130656	0.893114	20-40th	HNRNPU
1	244864539	-	1738.11	0.0834019	0.94316	40-60th	HNRNPU
1	244864542	-	6115.1	0.0729423	0.944354	40-60th	HNRNPU
1	244864544	-	3025.31	0.0738242	0.87453	0-20th	HNRNPU
1	244864567	-	254.132	0.136675	0.878788	20-40th	HNRNPU
1	244864570	-	615.148	0.0617003	0.951644	60-80th	HNRNPU
1	244864572	-	192.802	0.294355	0.963415	60-80th	HNRNPU
1	244970390	+	109.399	-0.427499	0.978967	80-100th	EFCAB2
1	246566208	-	104.612	0.444819	0.82337	0-20th	TFB2M
1	246566225	-	104.54	1.10754	0.958231	60-80th	TFB2M
1	246566227	-	248.559	0.548002	0.941176	40-60th	TFB2M
1	246566254	-	177.227	0.0986133	0.933457	40-60th	TFB2M
1	246566261	-	671.074	0.0101304	0.919174	20-40th	TFB2M
1	248859085	-	104.368	0.165506	0.918221	20-40th	ZNF692
2	264900	+	1385.58	-0.784638	0.959505	60-80th	ACP1
2	677389	-	118.498	-0.68077	0.918367	20-40th	TMEM18
2	677436	-	184.208	-0.0736443	0.96355	60-80th	TMEM18
2	677454	-	211.037	0.710725	0.937294	40-60th	TMEM18
2	3377852	-	117.666	0.401269	0.95302	60-80th	EIPR1
2	3379722	+	215.104	-0.144594	0.981273	80-100th	TRAPPC12
2	3519530	-	254.385	-0.409286	0.826531	0-20th	ADI1
2	3519552	-	148.343	0.0619317	0.955224	60-80th	ADI1
2	3558360	-	234.78	0.224784	0.975	80-100th	RNASEH1
2	3575233	+	457.448	-0.378439	0.900774	20-40th	RPS7
2	3575296	+	160.27	-0.364597	0.954371	60-80th	RPS7
2	3575315	+	1418.51	-0.160015	0.973919	80-100th	RPS7
2	3575333	+	285.756	-0.0623256	0.895442	20-40th	RPS7
2	3575348	+	156.55	0.759127	0.762468	0-20th	RPS7
2	3575376	+	113.372	-0.327987	0.949296	60-80th	RPS7
2	8682056	+	18514.9	0.410794	0.80562	0-20th	ID2
2	8837597	-	141.798	-0.0945194	0.941552	40-60th	KIDINS220
2	8837598	-	148.604	0.315675	0.933333	40-60th	KIDINS220
2	8837613	-	571.38	-0.488944	0.956101	60-80th	KIDINS220
2	9423456	-	268.117	-0.328416	0.962987	60-80th	ITGB1BP1
2	9423528	-	150.243	-0.0356726	0.967366	80-100th	ITGB1BP1
2	9423631	+	159.792	-0.445734	0.940072	40-60th	CPSF3
2	9423648	+	138.863	0.167263	0.922515	40-60th	CPSF3
2	9423656	+	193.408	0.0311871	0.905622	20-40th	CPSF3
2	9423657	+	741.892	0.0372273	0.935473	40-60th	CPSF3
2	9555725	-	137.096	-0.114488	0.79375	0-20th	ADAM17
2	9555755	-	183.393	0.164239	0.925	40-60th	ADAM17
2	9630969	-	3220.77	-0.234723	0.945359	60-80th	YWHAQ
2	9630980	-	714.043	0.332065	0.94488	40-60th	YWHAQ
2	9630985	-	623.813	-0.0715205	0.968893	80-100th	YWHAQ
2	9630991	-	1407.36	0.122381	0.935742	40-60th	YWHAQ
2	9630997	-	4777.57	0.121313	0.978962	80-100th	YWHAQ
2	9631001	-	935.133	0.097221	0.97831	80-100th	YWHAQ
2	9631010	-	244.915	0.90502	0.933966	40-60th	YWHAQ
2	9843505	+	153.395	0.589612	0.9375	40-60th	TAF1B
2	10122712	+	236.174	0.133409	0.874126	0-20th	RRM2
2	10689975	-	1361.71	0.0848056	0.954903	60-80th	NOL10
2	10689978	-	197.191	0.168766	0.988333	80-100th	NOL10
2	10812715	-	168.913	0.0592217	0.946921	60-80th	PDIA6
2	10812720	-	141.51	-0.0264777	0.942186	40-60th	PDIA6
2	10812747	-	379.76	-0.321125	0.967581	80-100th	PDIA6
2	10812754	-	410.557	-0.0703737	0.840764	0-20th	PDIA6
2	10812782	-	116.228	0.203966	0.970414	80-100th	PDIA6
2	15591868	+	309.194	-1.30666	0.959936	60-80th	DDX1
2	15591906	+	392.682	-0.433652	0.965368	80-100th	DDX1
2	17753806	-	179.748	-0.426429	0.957493	60-80th	SMC6
2	18560651	-	109.171	0.408318	0.907176	20-40th	RDH14
2	19901947	-	107.477	-0.325026	0.928832	40-60th	TTC32
2	19901986	-	190.445	-0.0125857	0.952636	60-80th	TTC32
2	20051626	-	155.828	-0.359371	0.935929	40-60th	LAPTM4A
2	20051653	-	417.869	-0.197275	0.920973	20-40th	LAPTM4A
2	20051663	-	137.262	-0.238644	0.981413	80-100th	LAPTM4A
2	20051671	-	213.749	-0.0888494	0.949153	60-80th	LAPTM4A
2	20051678	-	109.828	0.182549	0.898089	20-40th	LAPTM4A
2	20350834	-	142.995	0.348378	0.909605	20-40th	PUM2
2	20350817	-	223.464	0.64123	0.931472	40-60th	PUM2
2	20350664	-	119.138	0.169836	0.928571	40-60th	PUM2
2	20447074	+	6531.99	0.37872	0.773183	0-20th	RHOB
2	20823101	-	149.956	-0.723851	0.955679	60-80th	LDAH
2	24047381	-	105.428	-0.474422	0.906731	20-40th	WDCP
2	24047391	-	420.175	-0.0821088	0.945063	60-80th	WDCP
2	24049743	+	103.093	0.306741	0.931373	40-60th	FKBP1B
2	24076232	-	131.2	0.0339817	0.915105	20-40th	SF3B6
2	24076243	-	290.194	-0.324525	0.986354	80-100th	SF3B6
2	24076249	-	141.509	-0.295824	0.97227	80-100th	SF3B6
2	24076264	-	436.282	-0.396227	0.927211	40-60th	SF3B6
2	24076273	-	110.605	-0.489236	0.904103	20-40th	SF3B6
2	24076313	-	412.838	0.361363	0.956398	60-80th	SF3B6
2	24076322	-	112.796	-0.0943979	0.910619	20-40th	SF3B6
2	24076328	-	940.12	-0.0439429	0.922184	40-60th	SF3B6
2	24076347	-	696.162	-0.345631	0.96725	80-100th	SF3B6
2	24076349	-	111.004	0.0575313	0.928691	40-60th	SF3B6
2	24076350	-	1039.37	0.36472	0.972508	80-100th	SF3B6
2	24076360	-	446.103	-0.508866	0.919626	20-40th	SF3B6
2	24076370	-	136.564	-0.0963723	0.953459	60-80th	SF3B6
2	24076376	-	309.871	0.516415	0.950435	60-80th	SF3B6
2	24793425	+	134.452	0.409149	0.860072	0-20th	CENPO
2	24793446	+	102.598	-0.31864	0.948637	60-80th	CENPO
2	25878464	-	161.241	0.364351	0.890796	20-40th	ASXL2
2	25878487	-	156.694	0.0532652	0.895935	20-40th	ASXL2
2	26034089	+	178.551	-0.49851	0.95858	60-80th	RAB10
2	26034100	+	200.965	0.138933	0.893617	20-40th	RAB10
2	26034118	+	373.802	-0.0503718	0.88184	20-40th	RAB10
2	26034124	+	105.911	0.869758	0.861678	0-20th	RAB10
2	26244604	-	350.816	-0.327598	0.985985	80-100th	HADHA
2	26244619	-	839.733	-0.507426	0.97065	80-100th	HADHA
2	26244632	-	936.516	-0.747362	0.961012	60-80th	HADHA
2	26244928	+	456.534	-0.212915	0.987897	80-100th	HADHB
2	26244939	+	1329.17	0.0259244	0.980899	80-100th	HADHB
2	26346131	+	116.9	-0.197186	0.958115	60-80th	SELENOI
2	26346136	+	187.447	0.290591	0.950843	60-80th	SELENOI
2	26346146	+	845.392	0.334667	0.971104	80-100th	SELENOI
2	26764321	+	162.105	0.393786	0.914286	20-40th	SLC35F6
2	26786058	+	115.222	0.0553185	0.932353	40-60th	CENPA
2	26786067	+	392.034	0.842487	0.953362	60-80th	CENPA
2	26786071	+	184.157	0.0457841	0.928731	40-60th	CENPA
2	27051668	+	203.914	0.669291	0.985178	80-100th	AGBL5
2	27071649	-	1028.74	-0.838367	0.971555	80-100th	OST4
2	27071658	-	716.875	-0.270706	0.979477	80-100th	OST4
2	27071669	-	437.457	-0.621794	0.974263	80-100th	OST4
2	27071673	-	142.663	0.222936	0.981206	80-100th	OST4
2	27134620	-	116.954	0.373759	0.9375	40-60th	PREB
2	27134636	-	248.712	-0.073561	0.929099	40-60th	PREB
2	27211946	-	112.052	-0.475627	0.8867	20-40th	SLC5A6
2	27212361	+	960.955	-0.116038	0.970133	80-100th	ATRAID
2	27217369	+	335.165	-0.427786	0.905109	20-40th	CAD
2	27323070	-	121.602	-0.457892	0.867659	0-20th	MPV17
2	27323090	-	130.481	-0.775297	0.96729	80-100th	MPV17
2	27323097	-	236.487	-0.479596	0.978599	80-100th	MPV17
2	27356764	-	971.832	-0.300267	0.963914	60-80th	GTF3C2
2	27356776	-	293.996	0.254178	0.955794	60-80th	GTF3C2
2	27370615	+	292.693	0.152501	0.927437	40-60th	SNX17
2	27370617	+	385.374	0.0491861	0.978855	80-100th	SNX17
2	27370627	+	161.083	0.00034177	0.93437	40-60th	SNX17
2	27370636	+	235.1	0.772663	0.702128	0-20th	SNX17
2	27409591	-	420.091	-0.492277	0.931546	40-60th	PPM1G
2	27428626	+	409.293	0.015634	0.944516	40-60th	NRBP1
2	27489743	-	217.195	-0.19687	0.964392	60-80th	IFT172
2	27629050	+	210.695	-0.0491599	0.862548	0-20th	GPN1
2	27663609	-	968.467	-0.04257	0.963603	60-80th	SUPT7L
2	27663614	-	440.258	-0.074687	0.969391	80-100th	SUPT7L
2	27663636	-	137.81	0.199978	0.92509	40-60th	SUPT7L
2	27663891	+	237.278	0.235627	0.933263	40-60th	SLC4A1AP
2	27771719	+	453.953	-0.213919	0.964468	60-80th	MRPL33
2	27771758	+	125.692	-0.627409	0.964881	80-100th	MRPL33
2	27771765	+	721.353	-0.418682	0.94299	40-60th	MRPL33
2	28751910	+	111.971	1.02565	0.948387	60-80th	PPP1CB
2	28751914	+	286.22	1.06926	0.965879	80-100th	PPP1CB
2	28751918	+	230.127	0.901061	0.957396	60-80th	PPP1CB
2	28752043	+	157.26	-0.442722	0.95	60-80th	PPP1CB
2	28752045	+	107.245	-0.0570704	0.917647	20-40th	PPP1CB
2	28752104	+	221.807	0.182184	0.888889	20-40th	PPP1CB
2	28752107	+	538.65	0.102751	0.96482	80-100th	PPP1CB
2	28870277	-	102.257	-0.0884255	0.903448	20-40th	TRMT61B
2	28870280	-	138.49	-0.461284	0.906722	20-40th	TRMT61B
2	28870309	-	252.759	-0.0856901	0.938263	40-60th	TRMT61B
2	28894619	+	121.421	-0.163208	0.949239	60-80th	WDR43
2	28894665	+	121.471	0.305219	0.935919	40-60th	WDR43
2	28894681	+	210.455	-0.69284	0.965447	80-100th	WDR43
2	28894690	+	1421.96	-0.543846	0.948435	60-80th	WDR43
2	28894695	+	151.02	-0.119797	0.923077	40-60th	WDR43
2	30146975	+	103.969	0.46135	0.925865	40-60th	YPEL5
2	30147007	+	221.484	-0.0541229	0.935043	40-60th	YPEL5
2	30447221	+	142.708	0.323285	0.984293	80-100th	LCLAT1
2	30447224	+	118.765	0.296638	0.95679	60-80th	LCLAT1
2	30447243	+	401.588	0.137866	0.966797	80-100th	LCLAT1
2	30447246	+	586.779	-0.0419418	0.966339	80-100th	LCLAT1
2	30447276	+	469.275	-0.0355546	0.921976	40-60th	LCLAT1
2	32039805	-	383.862	-0.456064	0.945747	60-80th	DPY30
2	32039809	-	421.544	0.0846728	0.960447	60-80th	DPY30
2	32039816	-	145.724	-0.0881068	0.974684	80-100th	DPY30
2	32039827	-	233.332	-0.273684	0.959922	60-80th	DPY30
2	32165864	+	1762.93	0.0271251	0.98252	80-100th	SLC30A6
2	32165882	+	580.619	-0.224672	0.978161	80-100th	SLC30A6
2	32277907	+	369.621	0.518288	0.935724	40-60th	YIPF4
2	32277913	+	140.471	0.301161	0.91047	20-40th	YIPF4
2	32357216	+	108.821	0.602181	0.92344	40-60th	BIRC6
2	32628035	+	219.47	0.167583	0.957494	60-80th	TTC27
2	32628096	+	349.538	-0.264686	0.957023	60-80th	TTC27
2	33599227	-	276.439	-0.175888	0.893115	20-40th	FAM98A
2	33599229	-	327.828	-0.295143	0.907889	20-40th	FAM98A
2	33599284	-	143.519	-0.169086	0.935484	40-60th	FAM98A
2	33599291	-	248.756	-0.209865	0.874866	0-20th	FAM98A
2	37084518	+	114.599	0.0985192	0.840816	0-20th	GPATCH11
2	37084536	+	444.473	-0.480575	0.892188	20-40th	GPATCH11
2	37196492	+	206.166	-0.553042	0.951456	60-80th	CEBPZOS
2	37196498	+	1840.93	-0.48705	0.973319	80-100th	CEBPZOS
2	37231581	-	110.391	-0.0633779	0.91129	20-40th	CEBPZ
2	37231589	-	606.725	-0.0241384	0.942301	40-60th	CEBPZ
2	37324726	-	146.582	-0.134723	0.932749	40-60th	PRKD3
2	37324730	-	159.124	-0.259154	0.938742	40-60th	PRKD3
2	37324772	-	197.361	0.085648	0.964539	60-80th	PRKD3
2	37671642	-	103.284	0.0406921	0.960938	60-80th	CDC42EP3
2	38377273	-	949.879	0.470615	0.960748	60-80th	ATL2
2	38377279	-	133.513	0.464767	0.889241	20-40th	ATL2
2	38377290	-	153.701	-0.155039	0.894192	20-40th	ATL2
2	38602922	-	254.198	0.250106	0.994048	80-100th	HNRNPLL
2	38602928	-	152.081	0.182896	0.980296	80-100th	HNRNPLL
2	38751359	-	3536.55	-0.0690323	0.923371	40-60th	SRSF7
2	38778206	+	110.178	-0.357467	0.894807	20-40th	GEMIN6
2	38778221	+	298.21	1.29727	0.933866	40-60th	GEMIN6
2	38875908	-	114.504	-0.524844	0.98543	80-100th	DHX57
2	38875921	-	113.478	-0.166512	0.929735	40-60th	DHX57
2	38875934	-	188.449	-0.211028	0.974775	80-100th	DHX57
2	38875996	+	328.575	-0.103006	0.984733	80-100th	MORN2
2	38876003	+	223.433	0.225236	0.943005	40-60th	MORN2
2	39121035	-	134.4	0.110895	0.951952	60-80th	SOS1
2	39121051	-	125.935	0.717701	0.901681	20-40th	SOS1
2	39437278	-	215.052	0.664612	0.922984	40-60th	MAP4K3
2	39779258	-	226.684	0.137956	0.713158	0-20th	THUMPD2
2	43226605	-	157.677	1.18528	0.887097	20-40th	ZFP36L2
2	43596038	-	161.069	-0.671258	0.980892	80-100th	THADA
2	43774039	+	153.269	-0.391576	0.977316	80-100th	DYNC2LI1
2	43774049	+	204.168	-0.467307	0.960432	60-80th	DYNC2LI1
2	43774055	+	182.152	0.0711087	0.927746	40-60th	DYNC2LI1
2	43774057	+	102.399	0.25977	0.975078	80-100th	DYNC2LI1
2	43774081	+	116.328	0.1731	0.966474	80-100th	DYNC2LI1
2	43995958	-	676.738	0.49653	0.965588	80-100th	LRPPRC
2	43996005	-	297.923	-0.364945	0.965452	80-100th	LRPPRC
2	44168877	+	366.522	0.946377	0.772093	0-20th	PPM1B
2	44361546	-	209.389	0.193541	0.961706	60-80th	PREPL
2	44361492	-	760.963	-0.207218	0.963315	60-80th	PREPL
2	44361521	-	145.538	-0.175183	0.940815	40-60th	PREPL
2	44361561	-	103.9	0.217939	0.959471	60-80th	PREPL
2	46542702	+	281.929	1.06115	0.965937	80-100th	RHOQ
2	46542736	+	141.783	0.371771	0.880435	20-40th	RHOQ
2	46617008	-	221.725	0.0441356	0.943431	40-60th	PIGF
2	46617201	+	125.467	0.106902	0.921336	20-40th	CRIPT
2	46617202	+	198.753	-0.118897	0.958904	60-80th	CRIPT
2	46617204	+	201.056	-0.0792963	0.922974	40-60th	CRIPT
2	46617210	+	253.35	-0.0584542	0.927215	40-60th	CRIPT
2	46617217	+	500.675	0.373432	0.940133	40-60th	CRIPT
2	46617232	+	226.894	-0.319189	0.977049	80-100th	CRIPT
2	46915761	-	251.074	0.137771	0.93856	40-60th	MCFD2
2	46915794	-	140.845	-0.236455	0.957627	60-80th	MCFD2
2	46915795	-	281.401	0.135797	0.94717	60-80th	MCFD2
2	47176511	-	9812.55	-0.656073	0.94237	40-60th	CALM2
2	47176514	-	1557.01	-0.444984	0.936267	40-60th	CALM2
2	47176515	-	1444.78	-0.243683	0.922229	40-60th	CALM2
2	47403130	+	161.009	0.251518	0.93019	40-60th	MSH2
2	47403158	+	508.462	0.405431	0.955378	60-80th	MSH2
2	47403167	+	253.349	-0.140822	0.979749	80-100th	MSH2
2	47403171	+	204.413	-0.30436	0.945946	60-80th	MSH2
2	47783145	+	2995.19	0.0387287	0.967091	80-100th	MSH6
2	47783147	+	229.905	0.220669	0.911409	20-40th	MSH6
2	47783174	+	238.584	-0.0200988	0.968347	80-100th	MSH6
2	47783205	+	296.837	0.268598	0.963012	60-80th	MSH6
2	53767804	+	345.652	0.0480103	0.95534	60-80th	CHAC2
2	53767824	+	254.321	-0.524913	0.91455	20-40th	CHAC2
2	53767862	+	165.92	-0.0364713	0.861582	0-20th	CHAC2
2	53786878	-	108.685	-0.139567	0.97313	80-100th	ASB3
2	53970993	-	272.1	0.176486	0.898305	20-40th	PSME4
2	53971016	-	170.084	-0.285281	0.987552	80-100th	PSME4
2	54456327	+	100.406	-0.470434	0.94685	60-80th	SPTBN1
2	55050451	-	905.513	0.256911	0.918468	20-40th	RTN4
2	55050497	-	120.312	-0.0850728	0.958042	60-80th	RTN4
2	55050499	-	183.778	-0.165156	0.936842	40-60th	RTN4
2	55050507	-	146.388	0.271926	0.912	20-40th	RTN4
2	55050524	-	132.405	-0.375063	0.979058	80-100th	RTN4
2	55050535	-	441.798	-0.0354752	0.947839	60-80th	RTN4
2	55050562	-	165.924	0.307893	0.948052	60-80th	RTN4
2	55232702	+	127.398	-1.05561	0.972411	80-100th	RPS27A
2	55269193	-	247.178	-0.31616	0.965026	80-100th	MTIF2
2	55269231	-	370.031	0.0825357	0.948529	60-80th	MTIF2
2	55269217	-	358.742	0.0436256	0.97094	80-100th	MTIF2
2	55419837	-	113.695	0.238213	0.957895	60-80th	CCDC88A
2	55419839	-	343.136	0.695	0.956522	60-80th	CCDC88A
2	55519674	+	102.227	-0.591051	0.965649	80-100th	CFAP36
2	55617595	-	113.337	0.23506	0.932675	40-60th	PPP4R3B
2	55617702	-	119.055	0.219339	0.950769	60-80th	PPP4R3B
2	58241323	-	411.089	-0.443984	0.949085	60-80th	FANCL
2	58241346	-	219.121	0.281135	0.957811	60-80th	FANCL
2	60756266	+	196.808	0.18689	0.971501	80-100th	PAPOLG
2	60756268	+	470.691	0.142048	0.898724	20-40th	PAPOLG
2	60756294	+	127.773	0.686906	0.933135	40-60th	PAPOLG
2	60756323	+	117.22	0.0318338	0.891156	20-40th	PAPOLG
2	61145116	+	275.017	-1.00416	0.96534	80-100th	C2orf74
2	61538219	-	139.528	-0.25468	0.95935	60-80th	XPO1
2	61538186	-	157.04	0.175651	0.910658	20-40th	XPO1
2	61538189	-	202.064	-0.118915	0.953189	60-80th	XPO1
2	61538206	-	128.443	-0.309419	0.903807	20-40th	XPO1
2	61538216	-	548.467	-0.0535865	0.954958	60-80th	XPO1
2	61538222	-	105.243	-0.100404	0.921002	20-40th	XPO1
2	61538234	-	331	-0.551241	0.957006	60-80th	XPO1
2	61538246	-	430.505	0.444535	0.923404	40-60th	XPO1
2	61538298	-	334.403	0.400189	0.890947	20-40th	XPO1
2	61538317	-	114.066	0.429778	0.745665	0-20th	XPO1
2	61538323	-	221.744	0.673033	0.870994	0-20th	XPO1
2	61538324	-	831.979	0.544533	0.930499	40-60th	XPO1
2	61538349	-	301.206	-0.0969964	0.953046	60-80th	XPO1
2	61538356	-	199.438	-0.0281122	0.943771	40-60th	XPO1
2	61888522	-	351.611	-0.311799	0.947774	60-80th	CCT4
2	61888526	-	196.806	-0.166342	0.981405	80-100th	CCT4
2	61888549	-	430.174	-0.995523	0.972727	80-100th	CCT4
2	61888559	-	100.666	-0.142152	0.924528	40-60th	CCT4
2	61888562	-	941.3	-0.232763	0.979226	80-100th	CCT4
2	61888577	-	206.124	-0.587417	0.884334	20-40th	CCT4
2	61888580	-	1966.06	-0.226216	0.947187	60-80th	CCT4
2	61888586	-	445.463	0.243922	0.932843	40-60th	CCT4
2	61888593	-	208.974	0.0510334	0.712142	0-20th	CCT4
2	61888597	-	3858.93	0.0964829	0.93947	40-60th	CCT4
2	61888602	-	211.322	0.0454864	0.83808	0-20th	CCT4
2	61888612	-	857.445	0.359823	0.855228	0-20th	CCT4
2	61905674	+	298.985	-0.215634	0.978056	80-100th	COMMD1
2	62196115	+	140.705	0.213975	0.905405	20-40th	B3GNT2
2	62705713	+	149.555	-0.531578	0.912837	20-40th	EHBP1
2	62705719	+	106.991	-0.293315	0.909853	20-40th	EHBP1
2	63588968	+	1876.4	-0.594333	0.952873	60-80th	MDH1
2	63588979	+	1082.32	-0.570834	0.963475	60-80th	MDH1
2	63589005	+	282.038	-0.187965	0.927507	40-60th	MDH1
2	63589012	+	170.839	0.249622	0.956836	60-80th	MDH1
2	64144420	-	195.665	-0.241297	0.954451	60-80th	PELI1
2	65130106	-	1721.28	-0.0364359	0.938136	40-60th	RAB1A
2	65130128	-	270.918	0.0526224	0.936341	40-60th	RAB1A
2	65227826	+	188.085	-0.183605	0.960784	60-80th	ACTR2
2	65227833	+	329.372	-0.231749	0.904306	20-40th	ACTR2
2	65227839	+	308.532	-0.0436243	0.643886	0-20th	ACTR2
2	65227840	+	193.568	-0.270372	0.834515	0-20th	ACTR2
2	65227847	+	417.157	0.496505	0.890656	20-40th	ACTR2
2	66435125	+	173.589	-0.0855365	0.911011	20-40th	MEIS1
2	66435169	+	117.914	0.0356687	0.93774	40-60th	MEIS1
2	67397333	+	149.925	0.142718	0.888172	20-40th	ETAA1
2	67397340	+	350.499	0.856287	0.847534	0-20th	ETAA1
2	68063004	-	819.925	0.574346	0.978807	80-100th	C1D
2	68063013	-	168.431	0.462624	0.952618	60-80th	C1D
2	68157922	+	280.185	0.33895	0.95082	60-80th	PNO1
2	68252497	-	1237.63	0.335819	0.887137	20-40th	PPP3R1
2	69013357	+	562.685	0.540964	0.987179	80-100th	ANTXR1
2	69387226	-	130.403	0.418416	0.594828	0-20th	GFPT1
2	69437435	-	611.504	0.0824343	0.938897	40-60th	NFU1
2	69893956	+	871.495	-0.0196376	0.954172	60-80th	SNRNP27
2	69893958	+	606.262	-0.0473707	0.966049	80-100th	SNRNP27
2	69893978	+	229.794	0.112578	0.972119	80-100th	SNRNP27
2	69893983	+	209.544	0.0548927	0.925359	40-60th	SNRNP27
2	70087477	+	2119	0.475007	0.942238	40-60th	PCBP1
2	70248578	-	603.634	-0.243367	0.913013	20-40th	TIA1
2	70248615	-	349.757	0.027834	0.917582	20-40th	C2orf42
2	70248622	-	167.225	0.211062	0.96011	60-80th	TIA1
2	70248660	-	111.543	1.15216	0.96633	80-100th	TIA1
2	70258143	+	203.605	-0.222283	0.974823	80-100th	PCYOX1
2	70258149	+	110.622	-0.470881	0.972056	80-100th	PCYOX1
2	70293675	-	2341.8	-0.324248	0.968616	80-100th	SNRPG
2	70293679	-	199.132	-0.370417	0.801985	0-20th	SNRPG
2	70293680	-	4011.4	0.0173324	0.895146	20-40th	SNRPG
2	70293700	-	211.773	0.314942	0.901703	20-40th	SNRPG
2	70293703	-	260.815	0.211456	0.515676	0-20th	SNRPG
2	70293709	-	575.389	-0.100218	0.952403	60-80th	SNRPG
2	70293715	-	1626.96	-0.268592	0.967773	80-100th	SNRPG
2	70293717	-	975.819	-0.267745	0.930143	40-60th	SNRPG
2	70293728	-	167.061	-0.0690721	0.932515	40-60th	SNRPG
2	70293730	-	664.893	0.149116	0.959149	60-80th	SNRPG
2	70293731	-	507.895	0.133911	0.965682	80-100th	SNRPG
2	70293737	-	2109.51	-0.0316193	0.966872	80-100th	SNRPG
[truncated: 11,999 more rows]

## Sheet: HEK293T_Initiation_motif
Chr	Position (hg38, 1-based)	Strand	baseMean	log2FoldChange	HEK293T	m6Am level (HEK293T)	Motif
1	959258	-	109.876	-0.18415	0.976091	NOC2L	BA		Student's t-test
1	959268	-	102.718	-0.432796	0.952826	NOC2L	BA					P-value
1	1000123	-	299.771	0.244241	0.965967	HES4	BA		BA	vs	BBCABW	0.123832
1	1231972	-	191.14	0.2011	0.717489	SDF4	BBCABW		BA	vs	SSCAGC	5.90421e-15
1	1231981	-	336.071	0.346433	0.93835	SDF4	VARR		BA	vs	VARR	9.25942e-30
1	1231983	-	174.6	0.212213	0.873531	SDF4	VARR		BBCABW	vs	SSCAGC	9.59665e-13
1	1231984	-	168.189	1.27302	0.634865	SDF4	VARR		BBCABW	vs	VARR	1.36537e-26
1	1273833	-	237.08	-0.05516	0.985658	UBE2J2	BA		SSCAGC	vs	VARR	5.09286e-30
1	1308597	+	249.399	-0.0991518	0.938127	PUSL1	BA
1	1308644	+	135.94	-0.212893	0.931395	PUSL1	BA
1	1324653	-	211.255	0.0218366	0.99345	INTS11	BA
1	1324658	-	148.301	0.00381054	0.958333	INTS11	BBCABW
1	1375171	-	320.81	0.164224	0.95094	AURKAIP1	BA
1	1375180	-	144.413	-0.295654	0.99236	AURKAIP1	BA
1	1375199	-	104.595	0.0761184	0.951797	AURKAIP1	BA
1	1375200	-	176.044	0.311226	0.945491	AURKAIP1	VARR
1	1399335	-	139.518	0.151046	0.984813	CCNL2	VARR
1	1399336	-	143.822	0.643495	0.953143	CCNL2	VARR
1	1407278	-	334.517	0.215026	0.911315	MRPL20	VARR
1	1407293	-	1767.95	-0.160738	0.955537	MRPL20	BA
1	1407296	-	228.11	-0.234877	0.984828	MRPL20	BA
1	1407299	-	450.998	-0.356445	0.987675	MRPL20	BA
1	1471778	+	133.889	0.553682	0.951505	ATAD3B	BBCABW
1	1512162	+	232.864	0.306415	0.915735	ATAD3A	BBCABW
1	1574631	-	102.783	0.019713	0.928416	SSU72	BBCABW
1	1891070	-	700.79	0.512369	0.972578	GNB1	BA
1	1891087	-	653.507	0.560918	0.783439	GNB1	VARR
1	2194772	-	552.081	0.462513	0.97772	FAAP20	BBCABW
1	2391554	-	189.351	0.779172	0.789869	MORN1	BA
1	2391841	+	409.026	0.228955	0.965842	RER1	VARR
1	2391842	+	969.689	0.0965004	0.972569	RER1	BA
1	2391854	+	137.485	-0.338543	0.979508	RER1	BA
1	2526596	-	542.895	-0.254624	0.944162	PANK4	BBCABW
1	3796491	-	135.079	-0.254744	0.982724	LRRC47	SSCAGC
1	3857211	-	123.943	-0.0746775	0.970964	CEP104	VARR
1	3900258	-	270.326	-0.0574222	0.982885	C1orf174	BA
1	6199588	-	653.22	-0.248822	0.961295	RPL22	BA
1	6199609	-	349.384	-0.721592	0.97572	RPL22	BA
1	6235929	-	189.458	-0.407407	0.867925	ICMT	BA
1	6235988	-	120.358	0.18305	0.957895	ICMT	BBCABW
1	6393377	-	628.488	-0.61845	0.945242	ACOT7	BBCABW
1	6393381	-	175.652	-0.50672	0.931138	ACOT7	BBCABW
1	6393767	-	169.284	0.250301	0.959953	ACOT7	BA
1	6554533	-	185.943	0.221452	0.927711	NOL9	BA
1	6554535	-	696.833	0.133477	0.972921	NOL9	VARR
1	6625186	+	106.007	-0.0814535	0.966013	THAP3	BA
1	6701813	-	127.664	0.211355	0.893204	DNAJC11	VARR
1	7771301	+	129.732	-0.288743	0.968531	VAMP3	BA
1	7771305	+	635.328	-0.527845	0.962935	VAMP3	BA
1	7961665	+	721.148	-0.386207	0.958643	PARK7	BBCABW
1	7961677	+	164.787	-0.278227	0.633943	PARK7	VARR
1	7961681	+	336.044	-0.601975	0.798555	PARK7	VARR
1	7961717	+	2331.04	-0.165975	0.96473	PARK7	BBCABW
1	7961723	+	137.577	-0.87005	0.920732	PARK7	BA
1	8817640	-	147.063	0.155288	0.95082	RERE	VARR
1	8878660	-	175.673	-0.462022	0.867116	ENO1	VARR
1	8878664	-	100.948	-0.109359	0.869324	ENO1	BA
1	8878644	-	745.595	-0.688906	0.928673	ENO1	BA
1	8878683	-	5243.55	-0.311419	0.978157	ENO1	BA
1	8878686	-	55158.9	-0.129787	0.9545	ENO1	BA
1	8878688	-	6045.78	-0.103553	0.950045	ENO1	BA
1	8878708	-	120.296	-0.765543	0.887078	ENO1	BA
1	8878709	-	795.621	-0.220972	0.883555	ENO1	VARR
1	8878712	-	941.145	-0.78368	0.958484	ENO1	VARR
1	8878716	-	144.717	-0.971452	0.982384	ENO1	BA
1	8878720	-	327.003	-0.71831	0.978234	ENO1	BA
1	9539489	+	367.254	0.437156	0.95138	SLC25A33	BA
1	9823960	-	570.482	0.0325456	0.936	CLSTN1	BA
1	9823965	-	1492.25	0.7353	0.967278	CLSTN1	BA
1	9943359	-	651.724	-0.224288	0.906744	LZIC	BBCABW
1	9943327	-	113.552	0.551803	0.968121	LZIC	BA
1	9943488	+	122.571	0.441341	0.931818	NMNAT1	BA
1	10032965	+	102.054	0.754473	0.933824	UBE4B	VARR
1	10033213	+	167.593	-0.543145	0.930836	UBE4B	BBCABW
1	10210570	+	176.666	0.06236	0.932155	KIF1B	BBCABW
1	10399034	+	468.808	0.0770187	0.97786	PGD	BBCABW
1	10399069	+	1493.1	-0.486785	0.965804	PGD	BBCABW
1	10472477	-	112.735	-0.485859	0.966887	DFFA	VARR
1	10472494	-	233.01	-0.358172	0.951009	DFFA	BA
1	10472522	-	306.438	-0.216831	0.970556	DFFA	BA
1	10474950	+	200.505	-0.189045	0.966302	PEX14	BA
1	10474954	+	281.166	-0.336917	0.956069	PEX14	VARR
1	10474961	+	494.508	0.0163265	0.966958	PEX14	BA
1	10474963	+	169.654	0.61474	0.962963	PEX14	VARR
1	11012654	+	3472.96	0.0311473	0.952037	TARDBP	BBCABW
1	11060044	-	160.433	-0.476844	0.959375	SRM	BA
1	11099842	-	194.618	-0.179947	0.960849	EXOSC10	VARR
1	11099855	-	111.19	0.0759876	0.967587	EXOSC10	VARR
1	11273497	+	870.974	0.595279	0.908419	UBIAD1	BBCABW
1	11273503	+	115.007	0.69881	0.938053	UBIAD1	BA
1	11273510	+	525.233	0.160065	0.929104	UBIAD1	BA
1	11736136	+	520.972	0.0777798	0.965389	AGTRAP	VARR
1	11934723	+	122.06	0.0434062	0.950637	PLOD1	VARR
1	11980446	+	731.965	-0.273932	0.926966	MFN2	BA
1	13583804	+	103.472	0.467648	0.945066	PDPN	BA
1	13583832	+	669.533	0.525226	0.934155	PDPN	BA
1	15524215	-	139.842	-0.304997	0.922156	CASP9	BA
1	15617458	+	321.989	0.168448	0.94876	DDI2	BA
1	15807696	-	430.288	0.35715	0.972103	UQCRHL	VARR
1	15847859	+	565.11	-0.294042	0.913899	SPEN	BA
1	15847886	+	386.157	0.185998	0.957143	SPEN	BA
1	16367243	+	1188.14	-0.0826382	0.955	SZRD1	VARR
1	17011928	-	351.905	0.0304449	0.966216	ATP13A2	BBCABW
1	17054022	-	104.738	0.887575	0.791398	SDHB	VARR
1	17054029	-	825.831	-0.500118	0.9273	SDHB	VARR
1	17439669	-	409.713	1.09918	0.84918	RCC2	BA
1	17439671	-	3727.51	0.664724	0.88877	RCC2	BA
1	17439675	-	266.682	0.710216	0.877193	RCC2	BA
1	17438554	-	180.81	-0.340987	0.926724	RCC2	BBCABW
1	17438565	-	190.204	-0.347661	0.974978	RCC2	BA
1	17439664	-	163.443	0.286315	0.904328	RCC2	BA
1	17439721	-	250.133	0.477137	0.852263	RCC2	BBCABW
1	19210261	-	223.097	0.0527015	0.931624	UBR4	BA
1	19210264	-	124.617	0.0629982	0.953488	UBR4	BBCABW
1	19251522	-	520.166	-0.048742	0.923427	EMC1	BA
1	19251795	+	334.978	0.152217	0.973333	MRTO4	BA
1	19251805	+	923.172	0.0202126	0.961048	MRTO4	BA
1	19251820	+	572.439	-0.171966	0.913264	MRTO4	BA
1	19251826	+	112.258	-0.165833	0.950272	MRTO4	BA
1	19312101	-	123.57	-0.47176	0.965812	AKR7A2	BA
1	19312326	+	222.403	-0.142475	0.972161	SLC66A1	BA
1	19485477	-	123.564	-0.781499	0.949686	CAPZB	BBCABW
1	19596984	+	113.258	-0.153646	0.96129	MICOS10	BA
1	19596990	+	532.665	-0.203655	0.965517	MICOS10	VARR
1	19597018	+	166.477	-0.626008	0.837956	MICOS10	VARR
1	19597021	+	370.125	-0.260634	0.966338	MICOS10	VARR
1	19597029	+	220.334	-0.938771	0.954306	MICOS10	VARR
1	20508129	-	121.098	0.290045	0.924623	MUL1	VARR
1	20661403	-	177.045	0.0294688	0.974855	DDOST	BA
1	20661450	-	190.948	-0.189085	0.975	DDOST	BA
1	20786663	-	291.958	0.381335	0.901278	HP1BP3	BA
1	20786666	-	1462.73	0.19576	0.962086	HP1BP3	BBCABW
1	20786652	-	274.105	-0.390866	0.899851	HP1BP3	BBCABW
1	20787307	-	213.106	-0.0870239	0.970252	HP1BP3	BA
1	21176859	-	236.11	0.222258	0.910172	EIF4G3	BA
1	21176867	-	104.273	0.128923	0.895652	EIF4G3	BBCABW
1	21176883	-	135.412	-0.244671	0.914967	EIF4G3	BA
1	21176897	-	274.372	-0.458981	0.933915	EIF4G3	BA
1	21176909	-	107.79	0.133808	0.962963	EIF4G3	BA
1	21783091	-	210.512	0.675476	0.943226	USP48	BA
1	21783096	-	184.099	0.307819	0.949882	USP48	VARR
1	22025505	+	147.174	-0.466927	0.960583	ENSG00000289694	BA
1	22052671	+	471.867	-0.187932	0.970284	CDC42	VARR
1	22052692	+	588.466	-0.203162	0.970016	CDC42	SSCAGC
1	22052700	+	136.888	-0.430895	0.864583	CDC42	VARR
1	22052711	+	7251.85	-0.192971	0.928966	CDC42	BBCABW
1	22052720	+	1611.85	0.112972	0.958948	CDC42	BA
1	22451858	+	166.531	0.233076	0.897281	ZBTB40	BBCABW
1	23168817	-	189.575	-0.13667	0.967213	LUZP1	SSCAGC
1	23344265	-	212.051	0.256921	0.787778	HNRNPR	VARR
1	23344275	-	213.265	0.560543	0.950719	HNRNPR	BA
1	23344281	-	1000.02	0.632287	0.910863	HNRNPR	BBCABW
1	23344300	-	164.251	0.274742	0.943038	HNRNPR	VARR
1	23344356	-	164.734	0.376871	0.953431	HNRNPR	BA
1	23531233	-	188.993	0.751591	0.471698	E2F2	BA
1	23559529	-	312.408	0.407548	0.918848	ID3	BA
1	23691794	+	220.701	0.474236	0.947402	RPL11	VARR
1	23691795	+	160.083	-0.498955	0.979871	RPL11	BA
1	23743471	+	935.051	-0.111261	0.91913	ELOA	BBCABW
1	23743494	+	196.701	0.228037	0.913208	ELOA	BBCABW
1	23778418	+	1450.51	0.134774	0.910773	PITHD1	BA
1	23791185	+	159.299	-0.100134	0.906667	LYPLA2	VARR
1	23825428	-	107.847	0.21743	0.966989	HMGCL	BA
1	23868290	-	139.377	-0.71561	0.974194	FUCA1	BA
1	23980284	-	566.066	-0.591813	0.951282	SRSF10	BA
1	23980341	-	216.816	-0.23621	0.968329	SRSF10	BA
1	23980351	-	330.558	-0.0190159	0.960171	SRSF10	VARR
1	23980354	-	814.474	0.151479	0.977702	SRSF10	BA
1	23980369	-	316.132	0.464017	0.943506	SRSF10	VARR
1	23980370	-	559.731	0.103051	0.934976	SRSF10	VARR
1	23980372	-	190.636	0.134997	0.882404	SRSF10	VARR
1	24643296	+	281.484	-0.0846196	0.96875	SRRM1	BA
1	24643298	+	1034.43	-0.258786	0.933962	SRRM1	BA
1	24643302	+	1610.42	0.201845	0.966954	SRRM1	BA
1	24643306	+	628.904	0.014899	0.965909	SRRM1	BA
1	24745382	+	199.577	-0.623847	0.924051	CLIC4	BA
1	24745432	+	166.296	-0.272674	0.983333	CLIC4	SSCAGC
1	24745445	+	183.423	-0.44458	0.927342	CLIC4	BA
1	24745447	+	2430.25	-0.310298	0.936937	CLIC4	BA
1	25232479	-	112.091	0.286972	0.896046	SYF2	VARR
1	25232483	-	120.29	0.0671914	0.779398	SYF2	VARR
1	25232484	-	139.902	0.0367732	0.566922	SYF2	VARR
1	25232504	-	303.55	-0.263304	0.94958	SYF2	BA
1	25247454	-	2154.43	-0.122086	0.894369	RSRP1	BBCABW
1	25338308	+	929.474	0.172708	0.937296	TMEM50A	BA
1	25338329	+	309.999	0.263128	0.951837	TMEM50A	BA
1	25338334	+	2011.28	-0.379427	0.971013	TMEM50A	BA
1	25430894	+	115.757	0.9965	0.923977	MACO1	BA
1	25430900	+	200.17	0.612575	0.938931	MACO1	BBCABW
1	25906419	-	22145.6	-0.57567	0.968635	STMN1	BA
1	25906417	-	179.66	-0.48356	0.810952	STMN1	BA
1	25998063	-	114.819	-0.127307	0.949939	PAFAH2	BA
1	26169927	+	419.836	-0.287697	0.953909	ZNF593	BBCABW
1	26234214	+	111.138	-0.547845	0.927757	CEP85	BA
1	26280099	+	245.74	-1.26758	0.962756	SH3BGRL3	BBCABW
1	26306635	-	116.635	-0.311294	0.972678	UBXN11	BA
1	26472420	+	141.028	0.718848	0.930972	HMGN2	BA
1	26472441	+	109.576	0.844171	0.92132	HMGN2	VARR
1	26472471	+	104.803	-0.0077563	0.964515	HMGN2	SSCAGC
1	26472477	+	302.817	0.748016	0.956973	HMGN2	BA
1	26472479	+	246.907	0.665753	0.929436	HMGN2	BA
1	26472488	+	557.2	-0.417776	0.965912	HMGN2	BA
1	26472507	+	589.568	-0.979519	0.883117	HMGN2	BA
1	26472510	+	773.606	-0.762336	0.924528	HMGN2	BA
1	26472548	+	219.608	-0.500672	0.631579	HMGN2	VARR
1	26890274	-	1041.96	-0.223157	0.907347	GPN2	BA
1	26890283	-	433.584	-0.0312981	0.924969	GPN2	BA
1	26900457	-	115.585	-0.0240412	0.900641	GPATCH3	BA
1	26921747	+	144.846	0.494272	0.863777	NUDC	VARR
1	26921748	+	204.46	-0.154253	0.964912	NUDC	VARR
1	26921757	+	138.247	-0.100799	0.964151	NUDC	BA
1	26921760	+	319.834	0.238764	0.961165	NUDC	BA
1	26921787	+	452.801	-0.14569	0.94964	NUDC	VARR
1	27155125	-	201.815	0.0442302	0.877395	SLC9A1	BBCABW
1	27322266	+	121.691	-0.161535	0.925117	TMEM222	BA
1	27490053	-	112.535	-0.150289	0.925	WASF2	BA
1	27830787	+	211.909	-0.264205	0.970149	PPP1R8	BBCABW
1	27830814	+	3395.46	0.0817086	0.948944	PPP1R8	VARR
1	27914535	-	127.55	-0.263378	0.741214	RPA2	BA
1	27914539	-	154.025	-0.275363	0.880911	RPA2	BA
1	27914545	-	275.357	0.0826496	0.897597	RPA2	VARR
1	27914547	-	308.301	-0.174398	0.872031	RPA2	VARR
1	27914549	-	1203.57	-0.0586651	0.46847	RPA2	BA
1	27914575	-	814.296	-0.0983421	0.905642	RPA2	BBCABW
1	27914743	-	161.573	0.344299	0.906606	RPA2	BA
1	27935029	+	105.652	-0.20116	0.967724	SMPDL3B	BA
1	28088610	-	561.944	0.927942	0.961923	EYA3	BA
1	28088615	-	100.817	0.154125	0.947137	EYA3	BA
1	28088624	-	171.451	-0.233707	0.971279	EYA3	BA
1	28088634	-	117.881	-0.0965785	0.986667	EYA3	BA
1	28233020	-	482.612	-0.213889	0.958865	DNAJC8	BA
1	28233026	-	420.339	-0.309187	0.907558	DNAJC8	VARR
1	28233029	-	1037.16	-0.338743	0.975153	DNAJC8	BA
1	28233056	-	101.15	-0.148143	0.947413	DNAJC8	BA
1	28236095	+	122.768	0.00362159	0.985294	ATP5IF1	VARR
1	28236121	+	2656.54	-0.29262	0.972845	ATP5IF1	BBCABW
1	28236124	+	1232.83	-0.948321	0.984255	ATP5IF1	BA
1	28236131	+	925.738	0.0856481	0.973254	ATP5IF1	BA
1	28236132	+	390.864	-0.25815	0.96271	ATP5IF1	BA
1	28236135	+	202.912	0.266119	0.780011	ATP5IF1	VARR
1	28236137	+	154	0.274946	0.917376	ATP5IF1	VARR
1	28236154	+	8645.54	-0.358618	0.977503	ATP5IF1	BA
1	28236163	+	2366.99	-0.30435	0.973082	ATP5IF1	BA
1	28236171	+	218.309	-0.306173	0.95527	ATP5IF1	BA
1	28236183	+	108.619	0.330984	0.837575	ATP5IF1	BA
1	28259504	+	131.883	-0.0496523	0.944369	SESN2	BA
1	28259524	+	412.01	-0.319638	0.89703	SESN2	BBCABW
1	28369771	+	102.415	-0.224821	0.989362	PHACTR4	BA
1	28505984	+	104.53	0.409742	0.915138	RCC1	BA
1	28506113	+	104.208	-0.249889	0.975	RCC1	VARR
1	28518226	+	375.04	-0.0562787	0.965054	RCC1	BA
1	28518236	+	292.14	0.0573341	0.821622	RCC1	BA
1	28518255	+	1615.18	0.105729	0.946387	RCC1	BBCABW
1	28518282	+	259.752	0.0134931	0.945402	RCC1	BA
1	28553087	+	449.674	0.340409	0.937768	TRNAU1AP	VARR
1	28643029	-	220.038	0.210648	0.952919	TAF12	BBCABW
1	28643067	-	214.207	-0.463334	0.951752	TAF12	BBCABW
1	28643085	-	267.16	-0.0560987	0.963843	TAF12	BA
1	28736940	+	1040.81	-0.10325	0.941248	YTHDF2	BA
1	28736942	+	128.992	1.17415	0.966102	YTHDF2	BA
1	28887103	+	115.468	-0.548881	0.939073	EPB41	BBCABW
1	28914569	+	342.25	0.462874	0.987342	EPB41	BA
1	29236522	+	186.563	0.0725689	0.977401	PTPRU	BBCABW
1	31065717	-	616.766	-0.331988	0.910746	PUM1	BBCABW
1	31065667	-	300.554	-0.133771	0.833333	PUM1	BA
1	31296764	-	706.659	-0.388386	0.951381	SNRNP40	BA
1	31296766	-	438.699	-0.159232	0.964241	SNRNP40	VARR
1	31296782	-	353.707	0.0417035	0.904716	SNRNP40	BBCABW
1	31296791	-	118.464	-0.0265412	0.782961	SNRNP40	SSCAGC
1	31296815	-	340.295	0.446175	0.952769	SNRNP40	BA
1	31296818	-	268.794	0.174439	0.981848	SNRNP40	BA
1	31296819	-	154.346	0.78639	0.984091	SNRNP40	BA
1	31297006	+	134.574	0.363531	0.940924	ZCCHC17	VARR
1	31297036	+	323.8	-0.3772	0.931431	ZCCHC17	BA
1	31297041	+	169.248	-0.891454	0.980929	ZCCHC17	BA
1	31644873	-	4064.26	-0.223329	0.984739	PEF1	BA
1	31644867	-	212.858	-0.331695	0.972752	PEF1	BA
1	31644870	-	172.591	-0.59963	0.961698	PEF1	BA
1	31644878	-	279.962	-0.400941	0.966807	PEF1	BA
1	31644896	-	299.217	-0.455073	0.965819	PEF1	BA
1	31938354	-	243.709	-0.237772	0.975236	PTP4A2	SSCAGC
1	32013854	+	1201.02	0.142088	0.968111	KHDRBS1	BBCABW
1	32072966	+	127.18	-0.650349	0.956818	TMEM39B	BA
1	32108045	+	166.182	-0.165741	0.920725	KPNA6	BA
1	32108047	+	130.237	-0.695762	0.944271	KPNA6	VARR
1	32108056	+	998.829	-0.150711	0.966103	KPNA6	BBCABW
1	32108058	+	115.096	-0.0315185	0.859043	KPNA6	BA
1	32108065	+	132.582	0.068864	0.921687	KPNA6	BA
1	32108108	+	118.96	-0.270099	0.951049	KPNA6	VARR
1	32179675	+	225.434	0.0475189	0.950442	TXLNA	BA
1	32179712	+	259.706	0.502238	0.978641	TXLNA	SSCAGC
1	32179715	+	454.778	0.669662	0.957045	TXLNA	BA
1	32179719	+	150	0.370178	0.928571	TXLNA	BA
1	32179743	+	1260.59	0.0160008	0.966719	TXLNA	BA
1	32179745	+	190.224	-0.146587	0.935937	TXLNA	VARR
1	32179758	+	182.663	0.295919	0.946108	TXLNA	BA
1	32205671	+	246.661	0.0184737	0.902266	IQCC	BBCABW
1	32222390	+	192.102	-0.112015	0.976789	EIF3I	VARR
1	32222392	+	311.096	-0.311984	0.980769	EIF3I	BA
1	32222407	+	16167.8	-0.262157	0.988844	EIF3I	BA
1	32222411	+	2028.18	0.239067	0.954408	EIF3I	BA
1	32222433	+	2433.38	-0.545625	0.927961	EIF3I	BBCABW
1	32292126	+	310.714	-0.268172	0.933333	HDAC1	VARR
1	32292150	+	233.323	-0.342072	0.926829	HDAC1	BA
1	32336230	-	1113.89	0.29492	0.935684	MARCKSL1	BBCABW
1	32394425	-	294.267	-0.122786	0.910891	BSDC1	BA
1	32394430	-	201.161	-0.0598999	0.891089	BSDC1	BA
1	32394441	-	547.781	-0.0506932	0.969253	BSDC1	BA
1	32539430	+	128.579	0.760817	0.95	ZBTB8A	VARR
1	32651187	+	196.253	0.255021	0.671233	RBBP4	BA
1	32651207	+	241.373	0.116998	0.877602	RBBP4	VARR
1	32651210	+	1856.19	0.208749	0.965748	RBBP4	VARR
1	32651211	+	259.637	0.242231	0.937788	RBBP4	BA
1	32651212	+	409.115	0.134915	0.942574	RBBP4	BA
1	32651214	+	1718.83	0.268046	0.872727	RBBP4	BA
1	32651215	+	193.76	0.112068	0.7625	RBBP4	BA
1	32651217	+	497.533	-0.44504	0.926923	RBBP4	BA
1	32651230	+	160.782	0.0993186	0.857843	RBBP4	BBCABW
1	32651232	+	487.179	-0.170932	0.979245	RBBP4	VARR
1	32651267	+	135.767	-0.880406	0.936709	RBBP4	BA
1	32651280	+	883.632	-0.469598	0.960713	RBBP4	VARR
1	32651283	+	313.851	-0.678346	0.947146	RBBP4	BA
1	32817317	-	149.432	0.0496533	0.921986	YARS1	BA
1	32817327	-	484.184	0.17075	0.917827	YARS1	BA
1	32817329	-	400.179	0.78417	0.910294	YARS1	BA
1	32817338	-	112.234	0.00678197	0.920443	YARS1	BA
1	32817349	-	432.415	0.654048	0.957157	YARS1	BA
1	32817358	-	924.432	-0.135797	0.961853	YARS1	SSCAGC
1	32817414	-	752.573	-0.221648	0.912917	YARS1	BBCABW
1	33036848	-	1192.91	-0.933273	0.95359	AK2	BBCABW
1	33036879	-	1058.28	-0.085149	0.911949	AK2	BA
1	33036882	-	530.682	-0.500502	0.977475	AK2	BA
1	33036883	-	855.179	0.226189	0.932254	AK2	VARR
1	33349897	-	356.061	0.759388	0.915789	PHC2	BBCABW
1	33349908	-	123.656	0.174773	0.984252	PHC2	BA
1	34985330	-	114.575	0.292533	0.959538	ENSG00000284773	BA
1	35193129	-	249.677	-0.180242	0.770606	SFPQ	BBCABW
1	35193136	-	190.042	0.0824374	0.811538	SFPQ	BA
1	35557799	+	210.026	-0.0830439	0.93311	NCDN	BA
1	35641526	-	3099.69	0.459052	0.941855	PSMB2	BA
1	35641525	-	164.53	0.0313052	0.943077	PSMB2	BA
1	35641538	-	1369.28	-0.00245898	0.906643	PSMB2	VARR
1	35641501	-	109.242	-0.724972	0.927083	PSMB2	BA
1	35641550	-	135.872	0.17867	0.929167	PSMB2	VARR
1	35769964	-	700.019	0.426738	0.914972	CLSPN	BA
1	35769967	-	857.345	0.0308552	0.982414	CLSPN	BA
1	35769969	-	138.256	0.339137	0.904523	CLSPN	BA
1	35769970	-	220.759	0.304384	0.979651	CLSPN	BA
1	35769978	-	642.08	0.396367	0.965271	CLSPN	VARR
1	35769994	-	118.18	-0.25937	0.944444	CLSPN	BBCABW
1	35883233	+	172.895	0.300521	0.915909	AGO1	BBCABW
1	36149486	-	384.71	-0.140576	0.960972	TRAPPC3	BBCABW
1	36149490	-	158.86	-0.116672	0.966387	TRAPPC3	BA
1	36224448	+	206.089	0.0257788	0.749417	THRAP3	VARR
1	36385924	-	225.991	0.488687	0.938068	STK40	BBCABW
1	36397888	-	276.514	-0.541653	0.966316	LSM10	VARR
1	36397906	-	199.394	-0.454614	0.944402	LSM10	BBCABW
1	36397914	-	188.149	0.618251	0.920573	LSM10	BA
1	36464278	-	103.537	-0.237452	0.977379	MRPS15	BA
1	36464285	-	129.168	-0.546312	0.983415	MRPS15	BA
1	36464345	-	128.052	0.472182	0.961722	MRPS15	BA
1	36464378	-	170.595	0.100934	0.944217	MRPS15	BA
1	36464388	-	132.328	0.0148203	0.974359	MRPS15	BA
1	36464393	-	129.706	0.101583	0.962633	MRPS15	BA
1	37514754	-	832.588	0.218729	0.970223	MEAF6	BA
1	37554290	-	356.347	-0.0524502	0.94172	SNIP1	BBCABW
1	37595884	-	158.535	-0.147033	0.951421	GNL2	BA
1	37595887	-	128.859	0.249636	0.942047	GNL2	BA
1	37595935	-	1178.11	-0.399978	0.937785	GNL2	BBCABW
1	37690517	-	124.318	-0.372401	0.935079	AIRIM	BA
1	37690523	-	186.524	-0.0176302	0.807445	AIRIM	BA
1	37690529	-	262.269	0.144722	0.912965	AIRIM	BA
1	37692491	+	170.788	-0.135148	0.914127	CDCA8	BA
1	37692518	+	218.124	-0.318617	0.943089	CDCA8	BA
1	37692534	+	115.584	-0.332274	0.929303	CDCA8	BBCABW
1	37793847	+	189.647	-0.620897	0.941176	MANEAL	VARR
1	37807790	+	172.226	-0.15781	0.972927	C1orf122	BA
1	37807796	+	239.514	-0.304407	0.984536	C1orf122	BA
1	37808208	-	357.092	-0.0337314	0.945409	YRDC	BBCABW
1	37859592	-	134.11	0.395871	0.888889	MTF1	BA
1	37989986	-	152.846	-0.711845	0.902235	SF3A3	VARR
1	37989990	-	224.838	-0.393339	0.947368	SF3A3	BA
1	37990022	-	1413.24	-0.142714	0.917495	SF3A3	VARR
1	38005514	-	159.012	-0.725114	0.940171	FHL3	BBCABW
1	38012712	+	102.614	0.498061	0.948523	UTP11	BA
1	38012727	+	207.241	-0.0977143	0.948958	UTP11	BA
1	38012734	+	735.283	-0.190659	0.918332	UTP11	BA
1	38012749	+	132.555	-0.0892396	0.934761	UTP11	BA
1	38873329	-	398.646	-0.259509	0.978996	MYCBP	SSCAGC
1	38873348	-	1640.69	-0.310544	0.975153	MYCBP	BBCABW
1	38873355	-	152.828	-0.362618	0.925926	MYCBP	BA
1	38873356	-	222.752	-0.145813	0.962329	MYCBP	BA
1	38873368	-	433.411	-0.340739	0.974093	MYCBP	BA
1	38873374	-	167.315	-0.447259	0.89011	MYCBP	BA
1	38991245	+	185	0.491491	0.929041	AKIRIN1	BBCABW
1	38991288	+	932.53	-0.189697	0.947982	AKIRIN1	BBCABW
1	39026318	+	209.806	-0.41761	0.990646	NDUFS5	BA
1	39026325	+	1128.76	-0.260611	0.980285	NDUFS5	BA
1	39026330	+	246.599	-0.309417	0.979015	NDUFS5	VARR
1	39026346	+	405.034	-0.972632	0.990897	NDUFS5	BA
1	39026350	+	4424.54	-1.07294	0.962563	NDUFS5	BA
1	39026371	+	1847.61	-0.306933	0.950366	NDUFS5	BA
1	39026373	+	371.925	-0.353071	0.963806	NDUFS5	VARR
1	39026375	+	679.149	-0.195094	0.941776	NDUFS5	VARR
1	39026376	+	296.612	-0.353399	0.887237	NDUFS5	VARR
1	39026382	+	227.99	0.0201896	0.899109	NDUFS5	VARR
1	39576819	-	113.032	0.258526	0.91453	PABPC4	BA
1	39738884	+	184.073	0.178509	0.775574	PPIE	VARR
1	39883496	-	198.523	0.0252886	0.969741	TRIT1	BBCABW
1	39883504	-	769.458	0.0300823	0.961214	TRIT1	BA
1	40040730	+	130.464	-0.0085459	0.968863	CAP1	VARR
1	40040754	+	106.569	-0.265979	0.949023	CAP1	VARR
1	40040760	+	110.809	-0.502911	0.842336	CAP1	VARR
1	40040775	+	187.596	-0.854897	0.961886	CAP1	BBCABW
1	40097245	-	1135.88	0.0483457	0.964897	PPT1	BA
1	40097247	-	2349.64	-0.471002	0.931743	PPT1	BA
1	40097254	-	1527.99	-0.0405197	0.943458	PPT1	BA
1	40258194	+	133.058	0.126141	0.957746	ZMPSTE24	BA
1	40258233	+	143.918	-0.667259	0.848	ZMPSTE24	BA
1	40258241	+	102.143	-0.373631	0.940898	ZMPSTE24	BA
1	40691689	+	101.963	0.0299577	0.732673	NFYC	VARR
1	40691722	+	140.726	-0.0123333	0.956811	NFYC	BA
1	40979698	+	312.658	0.040398	0.908497	CTPS1	BBCABW
1	40979700	+	138.289	0.063065	0.961538	CTPS1	BA
1	40979705	+	344.306	0.0322421	0.982156	CTPS1	BA
1	40979755	+	982.021	-0.3034	0.929791	CTPS1	BBCABW
1	42335232	-	379.241	0.467835	0.906699	FOXJ3	BA
1	42335236	-	190.673	1.10789	0.932153	FOXJ3	VARR
1	42456564	+	121.298	-0.257348	0.965383	PPCS	BA
1	42658424	+	3985.61	-0.34894	0.970393	PPIH	BA
1	42682418	+	463.448	0.573342	0.972484	YBX1	BBCABW
1	42682427	+	4110.06	-1.38428	0.951705	YBX1	BA
1	42766986	-	119.424	-0.396287	0.948582	P3H1	BA
1	42958861	-	309.589	0.321739	0.920314	SLC2A1	VARR
1	42958868	-	777.238	0.130075	0.929284	SLC2A1	VARR
1	43172297	-	451.295	0.512703	0.935902	EBNA1BP2	VARR
1	43172301	-	192.906	0.527285	0.931578	EBNA1BP2	BA
1	43172300	-	116.948	0.619052	0.979405	EBNA1BP2	BA
1	43172286	-	561.04	0.244441	0.941935	EBNA1BP2	BA
1	43358953	+	371.179	0.563529	0.944503	CDC20	BA
1	43358976	+	759.835	0.558854	0.954787	CDC20	BA
1	43358988	+	190.344	0.0374862	0.95612	CDC20	BA
1	43358989	+	376.018	-0.463018	0.931643	CDC20	BA
1	43368011	-	316.175	-0.657733	0.978864	ELOVL1	VARR
1	43368025	-	127.88	0.229314	0.985185	ELOVL1	VARR
1	43389791	-	115.122	-0.0550675	0.972222	MED8	BA
1	43389797	-	164.043	-0.0103562	0.96319	MED8	BA
1	43389798	-	192.867	-0.402813	0.92437	MED8	VARR
1	43650126	+	106.661	-0.292442	0.72549	KDM4A	BA
1	43650136	+	216.433	0.133957	0.97373	KDM4A	BA
1	43650149	+	352.967	0.0502453	0.914894	KDM4A	BA
1	43946966	+	167.014	0.0432689	0.920103	IPO13	BBCABW
1	43969987	+	182.924	-0.257531	0.929569	DPH2	BA
1	43969999	+	142.261	-0.344386	0.954345	DPH2	BA
1	43970008	+	173.905	-0.289187	0.930834	DPH2	BA
1	43970010	+	804.801	-0.603763	0.951859	DPH2	BA
1	43970013	+	168.24	-0.44675	0.924431	DPH2	BA
1	43974935	+	111.178	-1.26698	0.989583	ATP6V0B	BA
1	43974958	+	277.177	-0.467448	0.95316	ATP6V0B	BA
1	43974960	+	2863.43	-0.701388	0.967151	ATP6V0B	VARR
1	44631955	+	496.477	0.391775	0.954545	RNF220	BA
1	44631960	+	267.206	0.697711	0.946914	RNF220	BA
1	44631968	+	220.431	0.227832	0.714628	RNF220	BA
1	44739837	+	375.416	-0.173588	0.952146	KIF2C	BA
1	44739862	+	478.911	-0.463076	0.916768	KIF2C	BA
1	44775524	+	146.586	-0.0202172	0.846501	RPS8	BA
1	44775537	+	442.56	0.0117493	0.9776	RPS8	SSCAGC
1	44775545	+	1679.95	-0.174981	0.966731	RPS8	BA
1	44775547	+	747.89	0.204785	0.923452	RPS8	VARR
1	44775560	+	146.912	0.342359	0.956623	RPS8	BA
1	44775561	+	549.721	-0.190191	0.983202	RPS8	BA
1	44775582	+	1276.54	-0.678399	0.978799	RPS8	BA
1	44775586	+	708.342	-0.104445	0.967509	RPS8	SSCAGC
1	44986595	-	363.359	-0.508846	0.967397	EIF2B3	BA
1	44986599	-	166.746	-0.579359	0.955687	EIF2B3	BBCABW
1	44986610	-	114.074	0.162565	0.943182	EIF2B3	BBCABW
1	45012248	+	309.9	-0.289067	0.960716	UROD	BBCABW
1	45012252	+	252.652	-0.178678	0.954368	UROD	BA
1	45012254	+	989.189	-0.261079	0.979288	UROD	VARR
1	45012256	+	425.147	-0.398516	0.936552	UROD	BA
1	45012258	+	480.616	-0.283665	0.964583	UROD	BA
1	45340206	+	153.386	-0.192144	0.914867	TOE1	VARR
1	45340221	+	182.8	-0.173506	0.907323	TOE1	BBCABW
1	45340223	+	157.482	-0.35692	0.963668	TOE1	VARR
1	45500300	+	307.078	-0.311276	0.952381	MMACHC	BBCABW
1	45500316	+	196.932	-0.317329	0.918919	MMACHC	BA
1	45500323	+	173.894	0.291535	0.944118	MMACHC	BA
1	45521913	-	109.534	0.0940955	0.964268	PRDX1	BA
1	45521920	-	114.805	0.0104008	0.906569	PRDX1	BA
1	45550826	+	101.322	-0.0262604	0.986201	AKR1A1	SSCAGC
1	45550841	+	225.536	-0.150029	0.95796	AKR1A1	BBCABW
1	45550861	+	123.372	0.379442	0.942957	AKR1A1	VARR
1	45550898	+	162.881	-0.388891	0.967448	AKR1A1	BBCABW
1	45551065	+	183.461	-0.171358	0.971275	AKR1A1	BA
1	45584045	+	7294.29	-0.622367	0.949472	NASP	BA
1	45584046	+	179.51	-0.663157	0.955009	NASP	BA
1	45687090	-	207.191	0.0574094	0.932854	GPBP1L1	BA
1	45686527	-	254.709	-0.0560739	0.928009	GPBP1L1	BBCABW
1	45688181	+	538.028	-0.329727	0.931914	TMEM69	BBCABW
1	45688190	+	110.64	0.203629	0.923851	TMEM69	VARR
1	45688191	+	111.038	-0.12839	0.90604	TMEM69	BA
1	45688202	+	213.896	-0.399738	0.912626	TMEM69	BBCABW
1	46303651	+	524.168	-0.228929	0.88631	UQCRH	BBCABW
1	46303661	+	975.838	-0.621456	0.977319	UQCRH	BA
1	46303663	+	110.847	-0.358234	0.958084	UQCRH	BA
1	46303671	+	124.705	-0.0520809	0.940727	UQCRH	BA
1	46303691	+	5320.96	-0.425743	0.964389	UQCRH	BA
1	46303693	+	476.285	0.064783	0.927682	UQCRH	VARR
1	46303705	+	198.951	-0.628981	0.965797	UQCRH	BA
1	46303720	+	1889.35	1.46657	0.965937	UQCRH	BA
1	46340804	+	348.185	0.226699	0.967489	NSUN4	BA
1	46340819	+	102.231	0.416548	0.857143	NSUN4	BA
1	47314064	-	182.475	0.326902	0.859316	STIL	VARR
1	47314124	-	150.604	-0.211388	0.981651	STIL	BA
1	47314147	-	488.421	-0.251632	0.95572	STIL	BBCABW
1	47333914	+	410.372	-0.343976	0.973064	CMPK1	BA
1	50970245	+	402.689	0.02938	0.957644	CDKN2C	BA
1	50970254	+	262.02	-0.390178	0.951423	CDKN2C	BA
1	51236273	+	287.839	0.433653	0.882136	RNF11	BBCABW
1	51519271	-	144.198	-0.290962	0.965726	EPS15	BA
1	51519275	-	151.704	-0.507219	0.955352	EPS15	BBCABW
1	51729857	+	127.908	0.161722	0.945362	OSBPL9	BBCABW
1	51729861	+	115.881	-0.156964	0.786885	OSBPL9	VARR
1	51878727	-	701.96	-0.622031	0.982922	NRDC	VARR
1	51878750	-	189.206	-0.34587	0.970696	NRDC	VARR
1	52033803	-	149.192	0.681969	0.926905	KTI12	VARR
1	52055226	-	132.327	-0.20546	0.984252	TXNDC12	BA
1	52056332	+	621.385	-0.472003	0.9754	BTF3L4	BA
1	52404406	-	168.711	-0.275867	0.903226	ORC1	BBCABW
1	52404417	-	126.631	-0.0898529	0.924377	ORC1	BA
1	52404547	+	154.385	-0.135388	0.978295	PRPF38A	BA
1	52404561	+	265.345	-0.382654	0.977465	PRPF38A	BA
1	52404564	+	784.871	-0.353545	0.92891	PRPF38A	BA
1	52404602	+	2578.52	-0.440892	0.915743	PRPF38A	BA
1	52553092	-	498.698	0.188569	0.8499	TUT4	BBCABW
1	52553099	-	428.115	0.455838	0.965963	TUT4	BBCABW
1	52698326	-	130.089	-0.0671294	0.875576	COA7	BA
1	52698355	-	145.934	0.0124518	0.906929	COA7	BA
1	52842763	+	143.331	-0.0308777	0.962791	ZYG11A	BA
1	52927276	+	173.529	0.0229241	0.935275	SCP2	BA
1	53014932	+	116.094	-5.51864e-05	0.905058	SCP2	VARR
1	53014939	+	192.408	0.511014	0.555633	SCP2	VARR
1	53014941	+	133.653	-0.456342	0.954027	SCP2	VARR
1	53014943	+	107.959	-0.22868	0.86982	SCP2	VARR
1	53014947	+	575.392	0.505151	0.894654	SCP2	VARR
1	53014974	+	144.645	-0.0798383	0.953762	SCP2	BA
1	53220617	-	107.442	0.314589	0.935872	CZIB	BA
1	53220634	-	110.01	0.0772876	0.98995	CZIB	BA
1	53238496	-	980.124	-0.162832	0.929704	MAGOH	BBCABW
1	53238506	-	143.185	-0.128952	0.952439	MAGOH	BA
1	53238518	-	2284.98	0.446026	0.92571	MAGOH	BBCABW
1	53238525	-	681.124	0.124917	0.927495	MAGOH	VARR
1	53238543	-	341.352	0.0181515	0.965309	MAGOH	BBCABW
1	53838267	-	216.026	0.312345	0.987013	NDC1	BA
1	53838282	-	1144.46	0.00393436	0.977595	NDC1	BA
1	53838301	-	138.293	0.503135	0.938462	NDC1	BA
1	53838481	-	137.009	0.285189	0.958763	NDC1	BA
1	53838501	-	105.346	-0.0548853	0.969319	NDC1	BA
1	53945574	-	244.786	-1.56706	0.971824	IFT25	BA
1	53945669	-	124.047	0.628686	0.925439	IFT25	BA
1	53945699	-	572.974	0.21927	0.973388	IFT25	BA
1	54053201	-	168.887	-0.487693	0.965035	TMEM59	VARR
1	54053225	-	100.802	0.120268	0.992701	TMEM59	BA
1	54053246	-	102.913	0.0493095	0.926658	TMEM59	VARR
1	54053421	-	525.953	0.139659	0.963386	TMEM59	BA
1	54053441	-	132.717	-0.687682	0.963768	TMEM59	VARR
1	54053637	+	133.425	-0.705323	0.927362	TCEANC2	BA
1	54200001	-	170.156	-0.0878725	0.922137	CYB5RL	BA
1	54200010	-	220.128	0.517271	0.960591	CYB5RL	VARR
1	54200170	+	1227.71	0.00204482	0.939874	MRPL37	BBCABW
1	54200180	+	352.283	-0.286782	0.97951	MRPL37	SSCAGC
1	54200183	+	441.007	-0.0458139	0.946387	MRPL37	VARR
1	54200199	+	133.679	0.3863	0.947253	MRPL37	BA
1	54715870	+	260.039	-0.146355	0.924051	TTC4	BA
1	54887185	-	482.44	-0.538978	0.936508	DHCR24	VARR
1	54887195	-	1102.38	-0.63813	0.978196	DHCR24	BA
1	58546723	-	257.351	0.148987	0.976292	OMA1	BA
1	58546742	-	153.605	-0.349503	0.946524	DAB1	BA
1	58546744	-	354.068	-0.137584	0.971647	DAB1	BBCABW
1	58700062	-	860.484	0.0874001	0.940166	MYSM1	VARR
1	58700074	-	135.205	0.788174	0.954545	MYSM1	BA
1	58700103	-	120.057	0.884217	0.981132	MYSM1	BA
1	58783979	-	156.051	-0.123948	0.875	JUN	VARR
1	58784043	-	4488.88	0.285054	0.68226	JUN	BA
1	62437024	+	306.661	0.628667	0.976923	USP1	BA
1	62437029	+	280.689	0.136196	0.88734	USP1	BA
1	62437050	+	2629.61	0.851405	0.959597	USP1	VARR
1	62437051	+	251.211	0.792198	0.878472	USP1	VARR
1	62437060	+	462.014	0.594327	0.924672	USP1	VARR
1	62784132	+	266.399	0.67068	0.96203	ATG4C	VARR
1	62784137	+	109.891	-0.315387	0.960988	ATG4C	BA
1	63367650	+	304.632	0.0694756	0.948736	ALG6	BA
1	63367655	+	484.504	0.285474	0.953874	ALG6	VARR
1	63367668	+	223.404	-0.94413	0.974743	ALG6	SSCAGC
1	63523185	-	228.137	-0.691988	0.912875	ITGB3BP	BA
1	63523201	-	246.239	0.0301568	0.907167	ITGB3BP	BA
1	63523225	-	861.359	-0.100328	0.94286	ITGB3BP	BA
1	63593411	+	272.331	-0.713575	0.982014	PGM1	BA
1	64470129	+	163.135	-0.2713	0.962162	CACHD1	SSCAGC
1	64470142	+	121.835	-0.61873	0.92803	CACHD1	BBCABW
1	64966497	-	184.666	-0.0978817	0.945545	JAK1	BA
1	65147622	+	112.759	-0.0427858	0.955939	AK4	VARR
1	65148203	+	111.458	-0.0015478	0.915789	AK4	BBCABW
1	65254462	+	121.396	0.306866	0.952778	DNAJC6	BA
1	65420668	+	133.796	-0.247903	0.954802	LEPROT	VARR
1	65420701	+	157.278	0.19366	0.978632	LEPROT	BA
1	66924990	+	184.632	-0.273888	0.971154	MIER1	VARR
1	66930270	+	301.672	-0.317469	0.955679	MIER1	BBCABW
1	67430334	-	298.173	-0.479449	0.830296	SERBP1	BA
1	67430375	-	214.714	-1.02227	0.846626	SERBP1	VARR
1	67430376	-	263.277	-0.68228	0.782979	SERBP1	VARR
1	67430386	-	5399.31	-1.19514	0.969373	SERBP1	BA
1	67430411	-	169.912	-0.38507	0.821918	SERBP1	BA
1	67430413	-	185.514	0.0187066	0.855072	SERBP1	VARR
1	67430414	-	567.228	0.188973	0.930172	SERBP1	VARR
1	67430416	-	415.798	0.309186	0.927145	SERBP1	VARR
1	67430418	-	1212.55	0.286194	0.802419	SERBP1	VARR
1	67685201	+	351.523	0.0315779	0.883901	GADD45A	BBCABW
1	67685237	+	148.024	1.12859	0.868298	GADD45A	BA
1	67833391	-	211.952	0.00532624	0.941818	GNG12	BA
1	68232521	-	239.415	0.777599	0.730176	WLS	BA
1	68232523	-	1364.12	0.324954	0.953483	WLS	BBCABW
1	68232549	-	147.148	0.2274	0.94837	WLS	BA
1	68497045	-	309.86	0.69797	0.921546	DEPDC1	BA
1	68497067	-	192.068	-0.0385886	0.928775	DEPDC1	BBCABW
1	68497106	-	615.284	0.543013	0.938972	DEPDC1	VARR
1	68497115	-	106.886	0.111356	0.922727	DEPDC1	BA
1	70205549	-	129.372	0.543066	0.921951	LRRC40	BA
1	70205552	-	656.012	0.186206	0.923706	LRRC40	BA
1	70205565	-	205.765	-0.607932	0.969972	LRRC40	BA
1	70205579	-	260.042	-0.261922	0.897025	LRRC40	BA
1	70205586	-	127.598	0.212459	0.939347	LRRC40	BA
1	70205670	+	244.491	0.0243858	0.945753	SRSF11	BBCABW
1	70205689	+	382.6	-0.0348017	0.974828	SRSF11	BA
1	70205699	+	261.875	-0.288656	0.984816	SRSF11	BA
1	70205719	+	643.354	-0.0577649	0.946205	SRSF11	VARR
1	70205722	+	138.901	0.178111	0.937708	SRSF11	BA
1	70205724	+	883.777	0.0598511	0.682856	SRSF11	VARR
1	70221380	+	293.05	-0.242112	0.916105	SRSF11	BA
1	70221479	+	118.498	0.484214	0.827387	SRSF11	VARR
1	70221481	+	184.069	-0.146759	0.881743	SRSF11	VARR
1	70221503	+	201.694	0.0620051	0.982041	SRSF11	BA
1	70221509	+	332.417	-0.45842	0.981829	SRSF11	SSCAGC
1	70354718	-	210.919	-0.0157782	0.787989	ANKRD13C	VARR
1	70354724	-	140.207	-0.149358	0.946903	ANKRD13C	VARR
1	70411254	+	195.146	0.709288	0.975558	CTH	BA
1	70411257	+	171.443	0.504512	0.924382	CTH	BA
1	70411276	+	117.89	0.14527	0.894212	CTH	BA
1	71081029	-	1645.18	-0.335076	0.935056	ZRANB2	BA
1	71081031	-	211.779	-0.507556	0.933455	ZRANB2	BA
1	71081033	-	466.342	0.0708606	0.922994	ZRANB2	VARR
1	71081034	-	277.18	-0.0307316	0.841401	ZRANB2	VARR
1	74733114	+	309.375	-0.0945977	0.944556	TYW3	BA
1	74733174	+	401.86	0.210472	0.935906	TYW3	BA
1	75724706	+	187.443	-0.180918	0.982469	ACADM	BA
1	75724709	+	521.863	-0.252361	0.959087	ACADM	VARR
1	75724714	+	140.557	-0.26648	0.898894	ACADM	BA
1	75724758	+	569.004	-0.228142	0.931899	ACADM	BA
1	75786268	+	164.435	-0.277506	0.879415	RABGGTB	BA
1	77219406	-	1897.31	0.493978	0.945828	PIGK	BA
1	77219430	-	1974.84	-0.457439	0.979031	PIGK	VARR
1	77219447	-	118.772	-0.0897849	0.959596	PIGK	BBCABW
1	77683374	-	183.416	0.674364	0.963585	ZZZ3	BA
1	77683398	-	329.937	0.693486	0.954724	ZZZ3	BA
1	77759811	-	297.495	0.0947313	0.950974	USP33	BBCABW
1	77779656	+	124.489	0.0659114	0.957447	MIGA1	BA
1	77779661	+	141.622	-0.0266699	0.970684	MIGA1	BA
1	77979077	-	968.799	0.345182	0.933657	FUBP1	BBCABW
1	77979098	-	122.468	-0.122005	0.900735	FUBP1	BA
1	84479245	+	118.086	0.187147	0.943052	RPF1	BA
1	84479259	+	460.686	0.0468089	0.946763	RPF1	BA
1	84479263	+	141.912	0.683431	0.934783	RPF1	VARR
1	84479264	+	381.167	0.280555	0.982169	RPF1	BA
1	84479267	+	3122.49	0.334221	0.886867	RPF1	VARR
1	84479272	+	262.688	-0.0654292	0.956835	RPF1	BA
1	84479276	+	254.126	0.388149	0.92487	RPF1	VARR
1	84506198	-	471.751	-0.643033	0.940694	GNG5	VARR
1	84506204	-	978.25	-0.850191	0.977578	GNG5	BA
1	85276368	-	157.888	-0.381756	0.963542	BCL10	BA
1	85465157	-	251.614	0.39721	0.944262	DDAH1	BA
1	85465159	-	561.248	0.305921	0.955823	DDAH1	BA
1	85465206	-	176.542	0.0279519	0.92638	DDAH1	BBCABW
1	85708388	-	159.001	0.293141	0.911538	ZNHIT6	BBCABW
1	85708415	-	1096.18	0.0234941	0.926683	ZNHIT6	BA
1	85708420	-	206.954	0.236355	0.946176	ZNHIT6	VARR
1	85708424	-	230.393	1.2382	0.927043	ZNHIT6	VARR
1	85708433	-	867.005	0.271787	0.93188	ZNHIT6	BA
1	86396283	-	373.217	-0.221379	0.938109	ODF2L	BBCABW
1	86396303	-	117.819	-0.042181	0.968807	ODF2L	BA
1	86396323	-	302.322	-0.08698	0.748376	ODF2L	BA
1	86704600	+	181.003	-0.145068	0.944	SH3GLB1	BBCABW
1	86704602	+	143.196	-0.166941	0.730769	SH3GLB1	BA
1	86914339	-	120.382	-0.648187	0.977528	SELENOF	BA
1	86914328	-	134.086	-0.102386	0.84585	SELENOF	BA
1	86914113	-	145.449	0.567216	0.854775	SELENOF	VARR
1	86914114	-	900.185	0.340081	0.956482	SELENOF	VARR
1	86914122	-	220.013	0.178964	0.939993	SELENOF	BA
1	86914124	-	244.415	0.360589	0.914413	SELENOF	VARR
1	86914126	-	1493.42	-0.10798	0.978452	SELENOF	BA
1	86914134	-	142.408	-0.154549	0.98037	SELENOF	BA
1	87328866	+	154.206	0.122161	0.890511	LMO4	BBCABW
1	88684239	+	132.739	0.0433862	0.927711	PKN2	BA
1	88684241	+	130.546	0.181027	0.952941	PKN2	BA
1	88684245	+	178.414	0.802717	0.901639	PKN2	VARR
1	88684337	+	130.051	0.104104	0.967033	PKN2	BA
1	88891564	-	1181.55	-0.373292	0.925598	GTF2B	BBCABW
1	88992608	-	143.7	-0.488052	0.961003	RBMXL1	VARR
1	88992622	-	212.665	-0.30175	0.961046	RBMXL1	BA
1	88992629	-	499.501	-0.46323	0.954218	RBMXL1	BBCABW
1	89821032	+	127.055	0.648559	0.910619	LRRC8D	BA
1	89995110	+	672.194	0.395546	0.982172	ZNF326	SSCAGC
1	91021965	-	282.233	0.737199	0.970149	ZNF644	BA
1	91022025	-	142.979	1.35689	0.950073	ZNF644	BA
1	91022232	-	181.744	0.151823	0.909341	ZNF644	BA
1	91500814	+	290.008	-0.1525	0.926854	CDC7	BA
1	91500858	+	283.665	0.203864	0.94368	CDC7	VARR
1	91500869	+	128.575	0.529385	0.940994	CDC7	BA
1	91500880	+	505.522	-0.336354	0.956052	CDC7	BA
1	91500888	+	160.81	0.0230539	0.945892	CDC7	BA
1	91886122	-	120.454	-0.0691679	0.944954	TGFBR3	BBCABW
1	91886151	-	186.748	-0.0876635	0.875	TGFBR3	BA
1	92298974	-	148.116	0.279544	0.948718	GLMN	BA
1	92298987	-	202.666	-0.040743	0.994778	GLMN	BA
1	92299059	+	774.925	0.558283	0.96108	RPAP2	BA
1	92831990	+	315.166	-0.680496	0.93279	RPL5	BBCABW
1	92832011	+	1202.05	-0.288458	0.947207	RPL5	BA
1	92832013	+	1382.42	-0.228049	0.946536	RPL5	BA
1	92832015	+	100.266	-0.500252	0.841837	RPL5	BA
1	92832028	+	234.703	0.164271	0.201794	RPL5	VARR
1	92832029	+	110.041	-0.357403	0.267327	RPL5	VARR
1	92832049	+	1032.34	-0.320047	0.903245	RPL5	BA
1	92832056	+	393.694	0.000384397	0.941349	RPL5	BA
1	92832073	+	6919.51	0.0101055	0.952276	RPL5	VARR
1	93079241	+	112.205	-0.192526	0.939815	MTF2	BBCABW
1	93079270	+	232.844	0.0474088	0.969586	MTF2	BA
1	93079283	+	1878.76	-0.0343957	0.962054	MTF2	BBCABW
1	93079293	+	116.452	0.0970839	0.929927	MTF2	VARR
1	93079298	+	565.37	0.168121	0.873723	MTF2	VARR
1	93180339	-	403.857	0.212146	0.934466	TMED5	BA
1	93180346	-	254.158	0.00198242	0.913514	TMED5	BA
1	93180386	-	308.241	-0.146744	0.949153	TMED5	BA
1	93180420	-	342.98	-0.0276614	0.926829	TMED5	BA
1	93180429	-	149.18	0.801724	0.956962	TMED5	BA
1	93345909	+	676.793	0.434072	0.883694	DR1	VARR
1	93345935	+	1531.48	0.284896	0.95432	DR1	VARR
1	93345949	+	116.596	-0.11777	0.956616	DR1	BA
1	93879179	-	187.63	-0.288903	0.9226	DNTTIP2	VARR
1	93879186	-	180.991	-0.340089	0.879093	DNTTIP2	VARR
1	93879204	-	104.077	-0.203357	0.93617	DNTTIP2	BBCABW
1	93909399	-	157.06	0.197456	0.952381	GCLM	BBCABW
1	93909430	-	533.551	0.630311	0.920266	GCLM	BBCABW
1	93909456	-	273.788	0.492118	0.881007	GCLM	BBCABW
1	94418392	+	205.097	-0.0932348	0.993939	ABCD3	BBCABW
1	94418413	+	335.936	-1.16743	0.960258	ABCD3	BBCABW
1	94418416	+	212.704	0.0474504	0.867257	ABCD3	BA
1	94418473	+	136.475	0.177278	0.845161	ABCD3	BBCABW
1	94927110	-	535.088	0.260716	0.951515	CNN3	SSCAGC
1	94927136	-	113.508	-0.460254	0.946565	CNN3	BA
1	94927137	-	344.093	-0.411881	0.977099	CNN3	BA
1	95072951	-	409.285	0.113863	0.957409	ALG14	BA
1	95234155	+	138.579	0.656169	0.928962	RWDD3	BBCABW
1	95234225	+	172.72	-0.0752793	0.931067	RWDD3	BBCABW
1	96721784	+	489.676	-0.126123	0.972912	PTBP2	SSCAGC
1	96721791	+	501.491	0.418265	0.962828	PTBP2	BBCABW
1	99766627	-	501.885	-0.339582	0.956873	FRRS1	BA
1	99766636	-	204.578	0.158121	0.925636	FRRS1	VARR
1	99969998	+	126.202	1.13587	0.956989	SLC35A3	VARR
1	100038097	+	282.374	0.0840883	0.949591	MFSD14A	VARR
1	100038133	+	122.819	0.00359921	0.895954	MFSD14A	BA
1	100038168	+	307.27	0.401697	0.93343	MFSD14A	BBCABW
1	100132904	-	169.632	0.00158033	0.810761	SASS6	VARR
1	100132910	-	103.275	0.306801	0.919255	SASS6	VARR
1	100132924	-	103.05	0.0039185	0.947485	SASS6	BA
1	100133163	+	751.685	0.256348	0.969025	TRMT13	BA
1	100133165	+	243.477	0.664296	0.917098	TRMT13	BA
1	100133166	+	103.213	0.501245	0.89834	TRMT13	BA
1	100133169	+	220.625	0.458479	0.530159	TRMT13	BA
1	100249834	-	500.045	-0.0169089	0.936152	DBT	BBCABW
1	100266216	+	1208.17	0.261014	0.972042	RTCA	BBCABW
1	100894811	-	102.343	0.274365	0.866727	EXTL2	BBCABW
1	100894842	-	153.751	0.109668	0.974937	EXTL2	BBCABW
1	100896092	+	116.596	0.576118	0.931153	SLC30A7	VARR
1	100896096	+	124.416	0.45037	0.928406	SLC30A7	BA
1	101025754	-	149.448	-0.381204	0.861527	DPH5	BBCABW
1	101025773	-	123.769	-0.212211	0.904707	DPH5	BA
1	107056704	+	362.815	0.363514	0.930334	PRMT6	BA
1	108692310	+	520.727	-0.135129	0.952649	PRPF38B	BA
1	108692321	+	121.145	-0.469798	0.974359	PRPF38B	VARR
1	108692327	+	1003.42	-0.215845	0.937651	PRPF38B	BBCABW
1	108692337	+	436.939	-0.101894	0.946822	PRPF38B	VARR
1	108746686	+	430.56	0.308376	0.947273	STXBP3	VARR
1	108963462	-	157.417	-1.09764	0.972887	CLCC1	VARR
1	108963480	-	634.677	0.0211463	0.935218	CLCC1	BA
1	108963488	-	194.897	-0.294937	0.980562	CLCC1	BA
1	108963499	-	115.95	-0.0746133	0.955102	CLCC1	BA
1	109042106	-	111.91	1.12972	0.961446	WDR47	BA
1	109075953	-	323.669	-0.122882	0.904225	TAF13	BA
1	109075973	-	100.827	0.0294162	0.806452	TAF13	BA
1	109075976	-	327.807	0.0751328	0.931818	TAF13	VARR
1	109075983	-	223.609	0.15939	0.972222	TAF13	SSCAGC
1	109075994	-	234.514	0.088717	0.966273	TAF13	BA
1	109076003	-	1214.72	0.538362	0.945052	TAF13	BA
1	109076006	-	222.238	0.440642	0.836449	TAF13	BA
1	109090773	+	241.782	-0.165133	0.956723	TMEM167B	BA
1	109213907	+	165.346	-0.217243	0.943307	SARS1	BA
1	109213920	+	536.834	-0.134098	0.945273	SARS1	BBCABW
1	109213932	+	1109.09	-0.0766984	0.92365	SARS1	BBCABW
1	109283144	-	165.274	0.340121	0.939961	PSRC1	BA
1	109397903	-	433.406	-0.0280509	0.961101	SORT1	BBCABW
1	109426437	-	2218.28	-0.414285	0.935353	PSMA5	BA
1	109426448	-	2128.44	-0.192346	0.939986	PSMA5	BBCABW
1	109426434	-	266.88	0.294721	0.902338	PSMA5	BA
1	109548584	+	101.418	-0.127406	0.976271	GNAI3	BA
1	109548586	+	214.101	-0.303842	0.985465	GNAI3	BA
1	109548606	+	214.22	-0.0144417	0.877076	GNAI3	BA
1	109548622	+	105.17	-0.0250107	0.622642	GNAI3	VARR
1	109548635	+	1383.17	0.0116139	0.986054	GNAI3	SSCAGC
1	109548638	+	361.001	0.158149	0.930764	GNAI3	BA
1	109548641	+	140.728	0.369979	0.869565	GNAI3	BA
1	109619846	+	107.95	-0.189903	0.952012	AMPD2	BA
1	109619886	+	145.787	-0.318815	0.908007	AMPD2	BA
1	109668057	+	456.404	-0.433373	0.978361	GSTM2	BBCABW
1	109668059	+	158.441	-0.443769	0.706468	GSTM2	VARR
1	109668094	+	162.671	-0.129904	0.992478	GSTM2	BA
1	109740316	-	709.503	-0.961757	0.985657	GSTM3	BA
1	109984786	+	324.096	-0.712801	0.955631	AHCYL1	BA
1	110339425	+	272.464	0.122583	0.941019	RBM15	BA
1	110339447	+	124.471	1.04343	0.815126	RBM15	VARR
1	110407694	-	274.145	-0.56066	0.955342	LAMTOR5	VARR
1	110407743	-	109.02	-0.0633453	0.9438	LAMTOR5	BA
1	110963909	-	105.111	-0.0680729	0.937255	LRIF1	VARR
1	110963920	-	174.638	-0.312039	0.885845	LRIF1	BBCABW
1	111140082	-	192.017	-0.18904	0.966076	DRAM2	BA
1	111140211	+	180.075	0.394639	0.945277	CEPT1	BA
1	111140220	+	111.847	0.193716	0.939303	CEPT1	BA
1	111140229	+	146.835	1.08622	0.971186	CEPT1	BA
1	111140247	+	400.909	-0.166634	0.948291	CEPT1	BA
1	111140251	+	208.493	-0.836106	0.97088	CEPT1	BA
1	111140255	+	105.042	-0.391832	0.947183	CEPT1	BBCABW
1	111449256	-	1050.1	-0.00642883	0.968019	WDR77	BA
1	111449292	-	204.194	0.0306834	0.976	WDR77	BA
1	111449430	+	171.703	-0.13014	0.95561	ATP5PB	BA
1	111449441	+	147.28	-0.870434	0.974777	ATP5PB	BA
1	111449449	+	153.145	-0.309687	0.947848	ATP5PB	VARR
1	111449451	+	809.928	-0.23134	0.950901	ATP5PB	BA
1	111449458	+	371.263	-0.239259	0.941441	ATP5PB	BA
1	111449465	+	1222.7	-0.784218	0.981046	ATP5PB	BA
1	111449482	+	246.447	-0.342875	0.957019	ATP5PB	BA
1	111449484	+	1025.53	-0.295965	0.976591	ATP5PB	VARR
1	111449494	+	1883.89	-0.637622	0.976961	ATP5PB	BA
1	111449503	+	392.114	-0.470141	0.897682	ATP5PB	BBCABW
1	111449505	+	156.551	0.0735844	0.907906	ATP5PB	VARR
1	111449514	+	427.026	0.00845537	0.908379	ATP5PB	BA
1	111449517	+	122.099	-0.603521	0.872624	ATP5PB	BA
1	111755702	+	246.441	-0.225782	0.900878	DDX20	BA
1	111755904	+	160.457	0.00641057	0.950119	DDX20	VARR
1	111755906	+	165.337	0.0684359	0.959881	DDX20	BA
1	112619784	+	241.429	-0.268721	0.96038	CAPZA1	BA
1	112619818	+	966.021	-0.0967306	0.976966	CAPZA1	BA
1	112619832	+	14941.6	0.140146	0.972156	CAPZA1	BA
1	112619834	+	722.906	0.304848	0.970739	CAPZA1	BA
1	112619835	+	691.744	0.210805	0.79171	CAPZA1	BA
1	112619837	+	430.689	0.12402	0.905199	CAPZA1	BA
1	112619842	+	100.848	0.730874	0.575521	CAPZA1	VARR
1	112707127	-	423.155	-0.939132	0.964813	RHOC	BBCABW
1	112956194	-	127.122	0.141395	0.657843	SLC16A1	VARR
1	112956195	-	14235.9	0.0574341	0.897163	SLC16A1	VARR
1	112956197	-	2256.12	-0.0669149	0.907661	SLC16A1	BA
1	112956199	-	581.554	-0.0270515	0.917197	SLC16A1	BA
1	112956217	-	609.091	0.951039	0.967914	SLC16A1	SSCAGC
1	112956224	-	327.725	0.491649	0.967919	SLC16A1	BA
1	112956245	-	163.01	0.220902	0.973684	SLC16A1	BA
1	113390515	+	409.913	0.123759	0.93345	MAGI3	BBCABW
1	113759473	-	115.909	0.13709	0.933649	PHTF1	BBCABW
1	113759486	-	146.92	0.136993	0.960938	PHTF1	BA
1	113812289	-	102.041	-0.147482	0.908932	RSBN1	BA
1	114581594	-	156.606	0.322088	0.928879	BCAS2	BA
1	114581609	-	316.447	-0.0740866	0.893048	BCAS2	VARR
1	114581613	-	891.646	-0.324051	0.961128	BCAS2	VARR
1	114581617	-	116.874	0.0250961	0.927961	BCAS2	BA
1	114581618	-	169.426	0.509815	0.942584	BCAS2	BA
1	114581619	-	437.29	0.459612	0.948887	BCAS2	VARR
1	114581620	-	791.478	0.394605	0.962329	BCAS2	VARR
1	114581622	-	996.992	0.622137	0.925496	BCAS2	BA
1	114581628	-	277.682	-0.179927	0.964575	BCAS2	BA
1	114581644	-	229.508	-0.368971	0.955173	BCAS2	BA
1	114716735	-	119.569	0.152213	0.865714	NRAS	BA
1	114716762	-	453.168	0.312753	0.949698	NRAS	BA
1	114716763	-	460.03	0.45545	0.9475	NRAS	VARR
1	114757960	-	636.891	-0.352731	0.778516	CSDE1	BA
1	114757977	-	1121.93	-0.357701	0.951149	CSDE1	BA
1	114757981	-	2790.84	-0.175353	0.95437	CSDE1	BA
1	114757987	-	4017.23	-0.248313	0.963831	CSDE1	BA
1	114757991	-	115.051	-0.0640978	0.914894	CSDE1	BA
1	114757993	-	616.744	0.210999	0.949226	CSDE1	VARR
1	114757997	-	571.262	0.171632	0.960359	CSDE1	BA
1	114757998	-	200.797	-0.191231	0.927903	CSDE1	VARR
1	114758000	-	287.717	-0.525678	0.953026	CSDE1	VARR
1	114758012	-	198.707	0.00788954	0.975451	CSDE1	BA
1	114780631	-	317.254	-0.311337	0.915254	SIKE1	VARR
1	114780644	-	246.807	0.0899142	0.953299	SIKE1	BA
1	114780666	-	223.301	-0.18025	0.973483	SIKE1	BA
1	114780674	-	140.041	-0.126978	0.940735	SIKE1	VARR
1	114780685	-	317.88	0.456009	0.92384	SIKE1	BA
1	115641970	+	141.119	0.0187389	0.935368	VANGL1	BA
1	116373212	+	101.845	-0.196383	0.943396	ATP1A1	BBCABW
1	117060327	+	454.712	-0.256856	0.950739	TTF2	BA
1	117060341	+	124.409	-0.163845	0.964409	TTF2	SSCAGC
1	117929578	-	162.267	0.068118	0.926941	GDAP2	BBCABW
1	117929583	-	127.11	0.1247	0.948718	GDAP2	BBCABW
1	117929621	-	142.56	-0.215432	0.991667	GDAP2	BA
1	117929735	+	151.563	-0.216482	0.940928	WDR3	VARR
1	117929754	+	1140.01	-0.353681	0.90069	WDR3	BA
1	117929755	+	193.653	-0.362151	0.959497	WDR3	BA
1	119140664	-	181.866	-0.0775336	0.963855	WARS2	BA
1	119140667	-	224.544	0.188824	0.941828	WARS2	VARR
1	119140671	-	136.216	0.190076	0.959079	WARS2	VARR
1	119711926	+	454.448	-0.542069	0.952376	PHGDH	BA
1	119711929	+	113.281	-0.630231	0.93047	PHGDH	BA
1	119711936	+	9049.01	-0.630421	0.942055	PHGDH	BBCABW
1	119711940	+	2577.92	-0.645729	0.947754	PHGDH	BA
1	120176462	-	624.693	-0.162511	0.937984	SEC22B	BA
1	120176469	-	127.413	-0.20985	0.928916	SEC22B	BA
1	120176493	-	185.462	0.303164	0.965569	SEC22B	BA
1	120176501	-	139.526	0.26999	0.923336	SEC22B	BA
1	120176515	-	481.207	-0.0316644	0.98336	SEC22B	BA
1	120176520	-	1160.01	-0.0406296	0.953426	SEC22B	BA
1	145608048	+	419.248	-0.359879	0.970203	GPR89A	BA
1	145824200	+	156.914	-0.00593964	0.943099	POLR3C	BA
1	145927451	-	414.36	0.186093	0.95	RBM8A	VARR
1	145927453	-	5173.72	0.232854	0.938044	RBM8A	BBCABW
1	145927467	-	135.509	0.288808	0.845902	RBM8A	BA
1	145927484	-	592.844	-0.0357961	0.967244	RBM8A	BA
1	145958002	-	179.137	-0.393102	0.963526	LIX1L	BA
1	145958009	-	119.742	-0.257784	0.955882	LIX1L	VARR
1	145964690	+	234.208	-0.614625	0.976362	POLR3GL	BA
1	145964716	+	218.371	-0.0647064	0.917634	POLR3GL	BBCABW
1	145964719	+	273.743	-0.192439	0.937762	POLR3GL	BA
1	145996577	-	188.14	1.43287	0.916502	TXNIP	BA
1	145996578	-	231.482	1.17139	0.923112	TXNIP	BA
1	145996579	-	507.761	1.19529	0.932245	TXNIP	VARR
1	147172470	-	155.629	0.0449113	0.985897	PRKAB2	BA
1	147541501	+	120.965	-0.5167	0.922071	BCL9	VARR
1	147670474	-	113.087	-0.070353	0.913687	ACP6	BA
1	147928451	+	119.25	0.0716013	0.947619	GPR89B	BA
1	148152313	-	134.627	0.193698	0.984199	NBPF11	BA
1	149812370	-	87929.9	-0.478377	0.706579	H2BC18	BA
1	149812360	-	1682.12	-0.243546	0.711538	H2BC18	BA
1	149812352	-	192.711	-0.757151	0.015873	H2BC18	BA
1	149832655	+	324.342	0.906309	0.860697	H4C14	BA
1	149832657	+	1225.31	1.31988	0.853257	H4C14	VARR
1	149861159	-	44935.3	1.07174	0.874627	H4C15	VARR
1	149861161	-	10499.5	0.78343	0.83156	H4C15	BA
1	149886653	-	139.332	-0.109591	0.949153	H2BC21	BA
1	149886682	-	127142	-0.262738	0.870436	H2BC21	BA
1	149886918	+	71822.9	0.0257671	0.825375	H2AC20	BA
1	149886919	+	17000	-0.212264	0.910481	H2AC20	BA
1	149886924	+	2080.28	-0.405301	0.778786	H2AC20	BA
1	149887961	-	703.825	-0.30055	0.769697	H2AC21	BA
1	149887963	-	9738.03	-0.807421	0.80184	H2AC21	BBCABW
1	149917842	-	175.299	0.0395789	0.938144	SV2A	BBCABW
1	149927779	-	104.134	-0.0543617	0.75	SF3B4	BA
1	149927781	-	244.477	0.0458272	0.842975	SF3B4	VARR
1	149927800	-	120.666	-0.217372	0.922737	SF3B4	VARR
1	149927803	-	1461.8	-0.284294	0.985635	SF3B4	BA
1	150010726	-	280.524	0.500435	0.953271	OTUD7B	BA
1	150010734	-	102.86	0.272924	0.964646	OTUD7B	VARR
1	150067840	+	205.723	-0.22664	0.941544	VPS45	BA
1	150235949	-	175.775	0.139217	0.928339	ANP32E	BA
1	150235956	-	206.382	-0.188576	0.90311	ANP32E	BBCABW
1	150235978	-	262.025	0.492698	0.708333	ANP32E	BA
1	150235987	-	176.328	-0.103999	0.965893	ANP32E	SSCAGC
1	150236001	-	217.909	0.128275	0.641439	ANP32E	VARR
1	150236012	-	291.416	-0.631011	0.902299	ANP32E	BA
1	150236112	-	4461.63	0.230218	0.893172	ANP32E	BBCABW
1	150236144	-	239.109	0.268825	0.934783	ANP32E	VARR
1	150268979	-	489.839	0.403756	0.927654	APH1A	BBCABW
1	150268995	-	126.059	-0.27045	0.93238	APH1A	BA
1	150268996	-	177.792	0.265672	0.915323	APH1A	VARR
1	150269025	-	317.956	0.219574	0.961259	APH1A	BA
1	150269060	-	108.302	0.255939	0.951557	APH1A	BA
1	150293842	+	636.039	0.100927	0.965282	MRPS21	BA
1	150293858	+	480.287	-0.333744	0.961873	MRPS21	BA
1	150293862	+	302.812	-0.444375	0.967351	MRPS21	VARR
1	150293864	+	101.489	0.039006	0.969732	MRPS21	BA
1	150293881	+	717.29	-0.349911	0.968192	MRPS21	BA
1	150293885	+	682.594	-0.308156	0.925976	MRPS21	BA
1	150321533	+	391.026	-0.175676	0.961712	PRPF3	BA
1	150364170	+	241.623	0.301355	0.840198	RPRD2	BA
1	150364180	+	122.536	0.0927571	0.440217	RPRD2	VARR
1	150487435	+	296.22	-0.5858	0.909605	TARS2	BBCABW
1	150579603	-	345.508	-0.255659	0.800609	MCL1	BBCABW
1	150579610	-	6089.41	-0.0961234	0.920031	MCL1	BBCABW
1	150629583	-	192.172	0.0540548	0.921114	ENSA	BA
1	150629577	-	4766.69	-0.114894	0.971103	ENSA	BA
1	150629582	-	122.706	-0.508416	0.933941	ENSA	BA
1	150629590	-	153.971	-0.124098	0.966852	ENSA	BA
1	150629596	-	3172.36	-1.7342e-05	0.942909	ENSA	BBCABW
1	150629605	-	260.028	-0.675741	0.935818	ENSA	VARR
1	150629606	-	242.266	0.818304	0.864764	ENSA	VARR
1	150629612	-	697.457	-0.327613	0.870708	ENSA	BA
1	150697149	-	362.031	-0.0670679	0.908585	GOLPH3L	BA
1	150697184	-	148.928	-0.459619	0.913309	GOLPH3L	BA
1	151008461	+	319.257	-0.56117	0.943772	PRUNE1	BBCABW
1	151008557	+	209.032	0.562702	0.910224	PRUNE1	BBCABW
1	151059573	-	452.731	-0.648223	0.96375	CDC42SE1	BA
1	151059583	-	191.736	-0.304298	0.939759	CDC42SE1	BA
1	151166056	+	265.263	0.0558303	0.450549	SCNM1	VARR
1	151166144	+	658.933	-0.365332	0.921541	SCNM1	BBCABW
1	151190173	-	497.455	0.173204	0.917815	VPS72	VARR
1	151190197	-	597.2	0.221846	0.928924	VPS72	BA
1	151198544	+	173.971	0.00407093	0.943478	PIP5K1A	BBCABW
1	151198596	+	155.243	0.174398	0.9375	PIP5K1A	BA
1	151254752	+	327.031	-0.825614	0.984615	PSMD4	VARR
1	151254772	+	151.179	-0.0720943	0.896667	PSMD4	VARR
1	151254773	+	171.05	-0.891161	0.925926	PSMD4	VARR
1	151327416	-	115.738	-0.11336	0.972477	PI4KB	SSCAGC
1	151327657	-	481.446	0.298776	0.921797	PI4KB	BA
1	151327669	-	141.816	-0.0305482	0.86413	PI4KB	BA
1	151327699	-	108.442	0.015741	0.942904	PI4KB	BA
1	151347249	-	232.017	-0.568129	0.948276	RFX5	VARR
1	151347293	-	109.953	0.12667	0.881313	RFX5	BA
1	151399534	+	159.819	0.0237884	0.960074	PSMB4	BA
1	151399564	+	6252.31	0.466407	0.975204	PSMB4	BBCABW
1	151459179	-	621.743	0.0430402	0.941995	POGZ	BA
1	151540309	+	301.53	-0.228054	0.906367	TUFT1	BBCABW
1	151763496	-	1811.95	-0.374955	0.964108	MRPL9	BBCABW
1	151993842	-	123.04	-0.166933	0.934783	S100A10	BA
1	151993855	-	129.024	-0.741022	0.965517	S100A10	BA
1	151993859	-	431.043	-0.272791	0.971698	S100A10	BA
1	152036972	-	234.358	-1.09501	0.932172	S100A11	BBCABW
1	153627505	-	863.825	-0.512464	0.975642	S100A13	BBCABW
1	153634038	+	106.568	0.29262	0.944532	CHTOP	BBCABW
1	153634051	+	128.219	0.354945	0.932817	CHTOP	BA
1	153634059	+	132.672	0.340749	0.907781	CHTOP	BA
1	153634075	+	1985.53	0.272332	0.899134	CHTOP	BBCABW
1	153634087	+	203.627	-0.211194	0.913043	CHTOP	BA
1	153634089	+	217.123	-0.114737	0.89404	CHTOP	BA
1	153658717	+	474.483	-0.181944	0.957907	SNAPIN	VARR
1	153658736	+	113.483	0.265145	0.941248	SNAPIN	BA
1	153670944	-	312.554	0.196115	0.89795	ILF2	BBCABW
1	153670972	-	1920.79	-0.185748	0.876353	ILF2	BA
1	153670987	-	4612.94	-0.172037	0.956516	ILF2	BBCABW
1	153728073	+	591.286	-0.221031	0.979592	INTS3	BBCABW
1	153963511	-	483.343	0.0779699	0.953751	SLC39A1	BA
1	153963515	-	1180.84	0.021787	0.945275	SLC39A1	BA
1	153963537	-	279.718	-0.806343	0.927357	SLC39A1	BA
1	153963549	-	176.893	-0.0263751	0.938556	SLC39A1	BA
1	153963550	-	235.172	-0.0273615	0.953762	SLC39A1	BA
1	153977336	-	155.733	0.147048	0.911846	JTB	BA
1	153977341	-	319.766	0.300031	0.951664	JTB	BA
1	153977656	-	315.627	0.23595	0.763158	JTB	BA
1	153977658	-	2379.2	0.0629813	0.905512	JTB	BA
1	153977661	-	160.087	0.253629	0.9	JTB	BA
1	153977663	-	362.989	0.447367	0.958175	JTB	VARR
1	153977674	-	374.975	0.120184	0.95465	JTB	BA
1	153977703	-	163.513	0.231173	0.934478	JTB	BA
1	154183193	-	180.85	-0.565796	0.918605	TPM3	BA
1	154183197	-	127.729	-0.0466243	0.923077	TPM3	VARR
1	154183218	-	395.418	-0.424139	0.97351	TPM3	BA
1	154220552	-	247.799	0.104095	0.835206	C1orf43	VARR
1	154220560	-	356.539	0.493221	0.946763	C1orf43	BA
1	154220621	-	166.802	-0.0709548	0.935827	C1orf43	BA
1	154220637	-	880.173	-0.293543	0.932047	C1orf43	BBCABW
1	154220681	-	114.569	0.743649	0.852814	C1orf43	BA
1	154220916	+	249.472	0.0629213	0.936111	UBAP2L	BA
1	154220917	+	178.36	-0.030019	0.958801	UBAP2L	BA
1	154220922	+	349.414	-0.00661976	0.950704	UBAP2L	BA
1	154220958	+	1283.55	-0.224315	0.940081	UBAP2L	BBCABW
1	154272589	+	114.882	-0.282437	0.944477	HAX1	BA
1	154272641	+	1663.33	-0.0427063	0.946099	HAX1	BA
1	154272649	+	555.273	-0.464091	0.924843	HAX1	BBCABW
1	154272661	+	134.872	-0.400103	0.961894	HAX1	VARR
1	154325525	+	468.293	0.512842	0.950125	ATP8B2	BBCABW
1	154325554	+	106.355	0.710829	0.966361	ATP8B2	BA
1	154627971	-	615.109	0.734119	0.944531	ADAR	BA
1	154627976	-	457.723	0.258845	0.965322	ADAR	VARR
1	154627987	-	302.024	-0.0627659	0.941176	ADAR	BA
1	154961731	-	277.316	0.165396	0.913514	PYGO2	BBCABW
1	154974375	-	142.682	0.340081	0.889344	SHC1	BA
1	154974661	+	140.247	-0.861597	0.926471	CKS1B	VARR
1	154974666	+	336.753	-0.0664757	0.949367	CKS1B	VARR
1	154974678	+	129.135	-0.478849	0.987421	CKS1B	BA
1	154974694	+	293.734	-1.09688	0.91954	CKS1B	BA
1	155063748	+	169.651	-0.24111	0.933333	EFNA4-EFNA3	BBCABW
1	155127876	+	135.712	-0.531786	0.944388	EFNA1	BA
1	155135849	+	239.301	-0.210609	0.96984	SLC50A1	BBCABW
1	155135852	+	273.075	-0.311451	0.970067	SLC50A1	BA
1	155136292	+	249.89	-0.261948	0.964784	SLC50A1	BBCABW
1	155140528	-	357.586	-0.888936	0.969072	DPM3	BA
1	155140531	-	1043.04	0.183843	0.992013	DPM3	BA
1	155140544	-	207.513	-0.0654418	0.93722	DPM3	BA
1	155173238	-	273.425	-0.596325	0.906582	KRTCAP2	BA
1	155173257	-	186.07	-0.283678	0.96993	KRTCAP2	BA
1	155173275	-	728.084	-0.190684	0.982775	KRTCAP2	BA
1	155173284	-	263.263	-0.451328	0.951087	KRTCAP2	BA
1	155173296	-	181.118	0.00662603	0.942607	KRTCAP2	BBCABW
1	155173302	-	729.751	0.0693038	0.957225	KRTCAP2	BA
1	155173306	-	115.745	0.586368	0.989051	KRTCAP2	BA
1	155173314	-	263.222	0.378189	0.887676	KRTCAP2	BA
1	155209238	+	152.656	-0.622699	0.971194	MTX1	VARR
1	155241226	-	165.558	-0.167713	0.871705	GBA1	BA
1	155241243	-	493.148	-0.0708884	0.940559	GBA1	BA
1	155241246	-	176.822	0.440783	0.946257	GBA1	BA
1	155241247	-	139.763	0.591201	0.919214	GBA1	BA
1	155244627	-	207.207	-0.694086	0.976401	GBA1	BA
1	155255483	-	253.519	0.0695952	0.980687	ENTREP3	BBCABW
1	155262264	-	253.032	-0.569306	0.892157	SCAMP3	VARR
1	155262266	-	645.467	-0.414015	0.94052	SCAMP3	BBCABW
1	155262274	-	115.072	-0.555535	0.951613	SCAMP3	BA
1	155262275	-	525.113	-0.228501	0.91404	SCAMP3	BA
1	155262278	-	148.598	-0.258486	0.946237	SCAMP3	BA
1	155262360	-	2941.63	-0.0325025	0.896477	SCAMP3	BBCABW
1	155308832	+	102.852	0.542706	0.924686	FDPS	BA
1	155308838	+	112.888	-0.128044	0.963197	FDPS	BA
1	155308852	+	286.235	-0.0614015	0.932371	FDPS	BA
1	155308869	+	140.863	0.145166	0.966716	FDPS	BA
1	155308873	+	524.445	-0.512652	0.963214	FDPS	BA
1	155308914	+	913.365	-0.374032	0.959913	FDPS	BA
1	155308917	+	118.005	0.168729	0.932153	FDPS	BA
1	155308937	+	2001.01	-0.173677	0.943727	FDPS	BA
1	155308944	+	184.934	-0.578827	0.973149	FDPS	VARR
1	155308947	+	915.904	-0.118255	0.980847	FDPS	BA
1	155308948	+	949.341	-0.228302	0.988283	FDPS	BA
1	155324519	+	435.106	-0.422244	0.890102	RUSC1	BA
1	155689093	+	256.511	-0.27503	0.954976	DAP3	BBCABW
1	155689099	+	123.739	-0.309661	0.982935	DAP3	VARR
1	155911349	-	124.755	-0.408056	0.947846	RIT1	BBCABW
1	155911381	-	131.87	0.146107	0.969005	RIT1	BA
1	155934407	-	352.596	-0.0223615	0.948936	KHDC4	BA
1	155934413	-	253.255	-0.491262	0.927108	KHDC4	BA
1	156020909	-	533.259	-0.422625	0.895849	SSR2	VARR
1	156020967	-	404.176	-0.206666	0.971171	SSR2	BBCABW
1	156054802	+	103.382	0.444785	0.977629	LAMTOR2	BA
1	156194103	+	596.227	-0.0709203	0.95436	SLC25A44	BBCABW
1	156194112	+	222.097	-0.297629	0.949686	SLC25A44	BA
1	156194117	+	259.679	-0.470426	0.946792	SLC25A44	BBCABW
1	156212989	+	476.338	-0.163551	0.953042	PMF1	BBCABW
1	156212993	+	554.933	-0.316304	0.969319	PMF1	BA
1	156213001	+	161.367	-0.0393195	0.875953	PMF1	VARR
1	156213007	+	3761.76	-0.0430743	0.971544	PMF1	BA
1	156282807	-	527.621	0.199184	0.896104	SMG5	BBCABW
1	156295674	-	396.439	0.142102	0.976371	GLMP	BA
1	156295689	-	134.309	-0.315914	0.966068	GLMP	BA
1	156338207	-	255.713	-0.432116	0.963939	CCT3	BA
1	156338217	-	174.944	-0.669342	0.980469	CCT3	SSCAGC
1	156338236	-	312.598	-0.0214145	0.948896	CCT3	VARR
1	156338237	-	166.816	0.493673	0.861883	CCT3	VARR
1	156338239	-	3882.69	-0.246084	0.977937	CCT3	BA
1	156338275	-	338.41	0.110897	0.97998	CCT3	SSCAGC
1	156338282	-	117.627	0.0449193	0.798373	CCT3	VARR
1	156338290	-	434.935	-0.254213	0.867726	CCT3	BA
1	156338305	-	271.662	-0.46141	0.97179	CCT3	BA
1	156601441	-	424.716	-0.257075	0.917292	GPATCH4	BBCABW
1	156601450	-	351.597	-0.0409663	0.97342	GPATCH4	VARR
1	156601469	-	105.56	-0.456435	0.897196	GPATCH4	VARR
1	156601470	-	344.423	0.808615	0.850259	GPATCH4	VARR
1	156601479	-	901.784	-0.206641	0.947697	GPATCH4	BBCABW
1	156705583	-	104.443	-0.605393	0.966261	CRABP2	SSCAGC
1	156728433	-	116.714	-0.266629	0.937423	ISG20L2	BA
1	156728447	-	135.615	-0.091848	0.953642	ISG20L2	BA
1	156728397	-	141.97	-0.233537	0.915416	ISG20L2	VARR
1	156728705	-	167.641	0.421447	0.976608	ISG20L2	BA
1	156728716	-	184.061	0.488095	0.940136	ISG20L2	BBCABW
1	156741080	-	176.808	0.477845	0.971377	MRPL24	VARR
1	156741088	-	888.31	0.115347	0.914955	MRPL24	BA
1	156751664	-	669.851	0.502341	0.841026	HDGF	BA
1	156751668	-	692.855	0.72096	0.530702	HDGF	VARR
1	156751670	-	1098.53	0.422949	0.876963	HDGF	BA
1	156751674	-	2595.83	0.6834	0.938918	HDGF	VARR
1	156751680	-	242.097	0.671736	0.91236	HDGF	BA
1	156751684	-	112.247	0.204764	0.890667	HDGF	BA
1	156751685	-	1139.29	0.501296	0.919763	HDGF	BA
1	156751688	-	131.087	0.13099	0.933852	HDGF	BA
1	156767539	+	1953.13	-0.253264	0.894966	PRCC	BBCABW
1	156767542	+	144.065	-0.274993	0.920502	PRCC	BA
1	156814110	-	121.915	-0.444277	0.903427	SH2D2A	BBCABW
1	159925478	-	1104.66	-0.853995	0.955268	TAGLN2	BBCABW
1	159925507	-	4692.45	-0.500819	0.937182	TAGLN2	BA
1	159925510	-	796.367	-0.654188	0.976121	TAGLN2	BA
1	159925543	-	109.127	-0.649068	0.986692	TAGLN2	BA
1	160031960	-	104.724	0.390967	0.92	PIGM	VARR
1	160098606	-	187.178	-0.00434679	0.882353	IGSF8	BBCABW
1	160098619	-	138.82	-0.13688	0.945423	IGSF8	BA
1	160262487	-	155.8	-0.266632	0.982737	DCAF8	BA
1	160262451	-	525.736	0.22283	0.858355	DCAF8	BBCABW
1	160262549	-	370.284	-0.184037	0.91441	DCAF8	BBCABW
1	160285130	-	909.756	-0.18382	0.950728	ENSG00000258465	BA
1	160285134	-	111.968	-0.867803	0.928169	PEX19	VARR
1	160285141	-	512.583	-0.183691	0.959735	PEX19	VARR
1	160285146	-	443.44	-0.0941952	0.961373	PEX19	BA
1	160343265	-	312.49	0.233765	0.962298	COPA	VARR
1	160343386	+	388.785	-0.409926	0.933464	NCSTN	VARR
1	161021152	-	222.248	-0.147833	0.951691	F11R	BBCABW
1	161045894	-	108.788	-0.162324	0.874768	USF1	BA
1	161045896	-	423.234	0.2947	0.871833	USF1	BA
1	161118037	-	1246.78	-0.0373344	0.983736	PFDN2	VARR
1	161118040	-	295.009	-0.194174	0.985795	PFDN2	SSCAGC
1	161118046	-	408.632	0.144457	0.966981	PFDN2	VARR
1	161118105	+	208.435	-0.0494986	0.93794	NIT1	BBCABW
1	161118129	+	300.499	-0.52649	0.973921	NIT1	BA
1	161153995	+	298.059	0.701185	0.880821	UFC1	VARR
1	161177501	-	368.164	0.194152	0.966292	B4GALT3	SSCAGC
1	161202367	+	1673.32	-0.123276	0.954785	NDUFS2	BBCABW
1	161226060	+	339.449	0.163349	0.971656	TOMM40L	BA
1	161226063	+	163.983	0.434657	0.9081	TOMM40L	BA
1	161314381	+	11329.9	-0.484981	0.956904	SDHC	BBCABW
1	161314391	+	2142.92	-0.381963	0.984789	SDHC	BA
1	161314393	+	152.699	-0.511822	0.955357	SDHC	BA
1	161314398	+	379.434	-0.129821	0.971347	SDHC	BA
1	161314399	+	554.775	-0.428444	0.985577	SDHC	BA
1	161314403	+	194.018	0.633003	0.668367	SDHC	VARR
1	161749773	+	134.441	-0.165459	0.951613	DUSP12	VARR
1	161749802	+	244.016	0.0612468	0.920455	DUSP12	BA
1	161766261	+	131.507	-0.0218579	0.943311	ATF6	BA
1	161766320	+	328.644	0.181313	0.965537	ATF6	BA
1	161766322	+	258.321	-0.239488	0.957895	ATF6	BA
1	161766324	+	436.781	0.105807	0.954255	ATF6	BA
1	162497831	+	149.259	0.328359	0.974619	UHMK1	BA
1	162497849	+	114.67	0.423479	0.899441	UHMK1	BA
1	163321735	-	170.653	0.178538	0.95904	RGS5	BA
1	163321954	+	158.878	-0.564041	0.94319	NUF2	BBCABW
1	163321957	+	258.407	-0.893753	0.958771	NUF2	BA
1	163321967	+	149.84	0.315297	0.899168	NUF2	VARR
1	163322008	+	155.464	0.157356	0.90665	NUF2	BA
1	164559184	+	462.325	0.0724755	0.954727	PBX1	BA
1	165631209	+	1093	-0.361367	0.990619	MGST3	BA
1	165631224	+	698.976	-0.554907	0.946809	MGST3	VARR
1	165631239	+	165.342	-0.590292	0.979468	MGST3	BA
1	165631243	+	742.31	-0.286971	0.951019	MGST3	BBCABW
1	165631245	+	343.47	-0.379854	0.965414	MGST3	BA
1	165631257	+	251.248	-0.439505	0.963757	MGST3	BBCABW
1	165631273	+	215.321	-0.592416	0.985206	MGST3	BA
1	165698513	-	266.21	-0.464715	0.949986	ALDH9A1	BBCABW
1	165698558	-	307.977	-0.112148	0.922243	ALDH9A1	BA
1	165698562	-	1638.07	-0.397891	0.9531	ALDH9A1	BBCABW
1	165768854	-	624.7	-0.222795	0.96002	TMCO1	BA
1	165768868	-	3924.74	0.216107	0.964985	TMCO1	BA
1	165768888	-	1104.87	0.234179	0.950441	TMCO1	BA
1	165768889	-	781.93	0.407811	0.947021	TMCO1	VARR
1	165768895	-	101.487	-0.110798	0.927074	TMCO1	VARR
1	165827525	+	213.584	-0.728716	1	UCK2	BA
1	165827555	+	250.056	-0.0278715	0.984	UCK2	BA
1	165827558	+	306.777	-0.477456	0.968153	UCK2	BA
1	165827584	+	173.652	-0.019964	0.93318	UCK2	BA
1	165827587	+	152.64	0.0799342	0.978648	UCK2	BA
1	165827616	+	968.972	0.305565	0.924868	UCK2	BA
1	165827639	+	108.581	0.710066	0.559727	UCK2	VARR
1	165827644	+	142.881	0.803137	0.910891	UCK2	VARR
1	166839475	+	330.74	0.460065	0.981707	POGK	BA
1	167220886	+	460.459	0.187231	0.957692	POU2F1	BA
1	167220891	+	276.583	-0.0824616	0.914634	POU2F1	BA
1	167553762	-	1265.85	-0.19946	0.967733	CREG1	BA
1	167935995	-	1055.44	-0.423563	0.903226	MPC2	BBCABW
1	167936008	-	203.656	0.204302	0.968302	MPC2	SSCAGC
1	167936696	+	189.301	-0.357314	0.919962	DCAF6	BA
1	168178962	+	670.46	0.1622	0.93389	TIPRL	BA
1	168179012	+	162.178	-0.242553	0.902516	TIPRL	BA
1	168179044	+	111.969	-0.64192	0.958478	TIPRL	BA
1	168226004	+	335.548	-0.309446	0.964623	SFT2D2	BA
1	168226010	+	137.356	1.37839	0.89557	SFT2D2	VARR
1	168226011	+	289.721	0.163924	0.964126	SFT2D2	VARR
1	169106323	+	625.394	0.12838	0.917742	ATP1B1	BA
1	169106690	+	181.454	0.2142	0.955115	ATP1B1	BBCABW
1	169427462	-	198.444	-0.0807074	0.877061	CCDC181	BA
1	169795040	+	485.82	-0.0971494	0.910777	FIRRM	BA
1	170074652	-	181.066	-0.352517	0.948023	KIFAP3	BBCABW
1	171485508	+	259.414	-0.084067	0.94152	PRRC2C	BA
1	171485511	+	155.65	0.276405	0.918288	PRRC2C	BA
1	171485533	+	742.539	-0.280589	0.971891	PRRC2C	BA
1	171485571	+	148.107	0.366919	0.890459	PRRC2C	VARR
1	171781674	+	176.752	0.301391	0.910125	METTL13	BA
1	172444069	-	255.332	-0.314883	0.876692	PIGC	BBCABW
1	172444099	-	152.178	-0.110654	0.93913	PIGC	VARR
1	173477284	+	136.558	-0.759399	0.965517	PRDX6	BBCABW
1	173477310	+	973.345	-0.597886	0.971038	PRDX6	BA
1	173477328	+	153.211	-0.590387	0.948276	PRDX6	BA
1	173477330	+	445.675	-0.702496	0.96728	PRDX6	VARR
1	173477346	+	2276.99	-0.0699432	0.984144	PRDX6	BA
1	173477352	+	186.678	-0.0503306	0.913774	PRDX6	BA
1	173477386	+	3286.09	-0.351264	0.993881	PRDX6	BA
1	173824581	+	144.567	-0.0162833	0.960511	DARS2	VARR
1	173824647	+	111.194	0.129053	0.912022	DARS2	BA
1	173868380	+	153.255	-0.221651	0.922261	ZBTB37	BBCABW
1	174159520	+	181.271	-0.18875	0.971944	RABGAP1L	BBCABW
1	174999435	+	130.48	-0.16892	0.964396	CACYBP	BA
1	174999462	+	172.077	-0.113145	0.936413	CACYBP	VARR
1	174999995	+	251.375	0.465378	0.876143	CACYBP	VARR
1	175000033	+	136.808	-0.633638	0.971671	CACYBP	BA
1	175000042	+	304.804	-0.110488	0.910321	CACYBP	VARR
1	175000087	+	184.207	-0.113401	0.946269	CACYBP	BA
1	175023418	-	318.861	-0.592266	0.972644	MRPS14	BA
1	175023425	-	3342.12	-0.249866	0.959581	MRPS14	BA
1	175023435	-	563.487	-0.478338	0.969789	MRPS14	BA
1	178725244	+	159.197	-0.616118	0.959596	RALGPS2	BBCABW
1	179082076	+	120.178	0.373819	0.727422	TOR3A	BA
1	179293802	+	242.056	-0.772653	0.963532	SOAT1	BA
1	179293807	+	133.03	-0.834521	0.980519	SOAT1	BA
1	179293836	+	387.398	-0.114033	0.903904	SOAT1	VARR
1	179877776	-	322.553	-0.228176	0.96962	TOR1AIP2	BA
1	179877803	-	4753.34	0.489403	0.93395	TOR1AIP2	BA
1	179877805	-	116.295	0.527313	0.945946	TOR1AIP2	BA
1	179882297	+	328.861	-0.229787	0.884848	TOR1AIP1	BBCABW
1	179882813	+	395.318	0.0151349	0.972516	TOR1AIP1	BA
1	179882816	+	187.246	-0.0671649	0.87907	TOR1AIP1	BA
1	179954810	+	313.926	0.115858	0.935929	CEP350	BBCABW
1	180154869	+	177.355	-0.269008	0.957143	QSOX1	BA
1	180502577	-	106.67	-0.0470774	0.925234	ACBD6	BBCABW
1	181022869	-	104.393	0.0487828	0.924658	STX6	BA
1	182391341	-	161.481	-0.421918	0.900552	GLUL	BBCABW
1	182391790	-	1765.02	-1.18447	0.901709	GLUL	BA
1	182839332	+	289.795	-0.109761	0.996183	DHX9	BA
1	182839350	+	3691.35	-0.0865352	0.953572	DHX9	BBCABW
1	182839718	+	105.371	0.302916	0.92517	DHX9	VARR
1	183635734	-	358.59	-0.434314	0.880694	ARPC5	BA
1	183635745	-	181.775	-0.145007	0.94847	ARPC5	VARR
1	183635754	-	316.144	0.122497	0.92523	ARPC5	VARR
1	183635768	-	238.794	-0.376723	0.940828	ARPC5	BA
1	183635783	-	593.143	0.023323	0.920074	ARPC5	BBCABW
1	183635803	-	172.745	0.106059	0.984632	ARPC5	BA
1	184051730	+	212.657	-0.211701	0.988673	TSEN15	BA
1	184051733	+	151.211	0.359334	0.955385	TSEN15	BA
1	184754786	-	132.226	0.0908871	0.907514	EDEM3	BA
1	185045489	+	251.016	-0.202899	0.910484	RNF2	BBCABW
1	185045558	+	640.038	0.171119	0.963436	RNF2	BBCABW
1	185045560	+	103.74	0.100891	0.896875	RNF2	BA
1	185156951	-	319.985	0.177666	0.962825	TRMT1L	BA
1	185317243	-	1311.34	0.0944913	0.926997	IVNS1ABP	BBCABW
1	186375254	-	968.807	-0.0396218	0.956908	TPR	BBCABW
1	186375276	-	107.875	-0.552454	0.976087	TPR	BA
1	186375885	+	107.048	0.0993109	0.946274	ODR4	BA
1	186828961	+	114.088	-0.0255639	0.933333	PLA2G4A	BA
1	192809041	+	343.429	0.0287235	0.935163	RGS2	VARR
1	193059336	-	453.216	0.654141	0.953714	UCHL5	BA
1	193059338	-	392.801	0.631229	0.943623	UCHL5	VARR
1	193059387	-	124.165	0.191007	0.921309	UCHL5	VARR
1	193059510	-	112.285	0.126751	0.969388	UCHL5	SSCAGC
1	193059612	+	308.599	0.370097	0.960674	RO60	BA
1	193059625	+	101.956	0.372946	0.964856	RO60	BA
1	193059637	+	140.898	0.501573	0.910448	RO60	BA
1	193059650	+	717.497	-0.059364	0.938453	RO60	BBCABW
1	193105382	-	126.31	-0.00467609	0.931264	GLRX2	BA
1	193105399	-	251.931	0.175702	0.985337	GLRX2	BA
1	193105414	-	631.554	0.00457925	0.960857	GLRX2	BBCABW
1	193105430	-	144.037	0.423507	0.97541	GLRX2	BA
1	193122034	+	453.629	0.0341586	0.963824	CDC73	BA
1	197146669	-	627.656	0.240136	0.977921	ASPM	VARR
1	198156998	+	218.863	0.408506	0.930328	NEK7	BA
1	198157036	+	112.3	0.644487	0.943396	NEK7	BA
1	200410026	-	262.331	0.0554582	0.956178	ZNF281	VARR
1	200410036	-	101.727	0.55248	0.913761	ZNF281	BBCABW
1	200410058	-	272.709	0.393138	0.941476	ZNF281	VARR
1	200620751	-	152.319	0.134777	0.96325	KIF14	BBCABW
1	201154478	-	144.303	0.490366	0.966675	TMEM9	BA
1	201154480	-	126.799	0.0594776	0.979294	TMEM9	BA
1	201154501	-	102.769	-0.589474	0.980453	TMEM9	BA
1	201829160	+	142.405	0.0579883	0.96823	IPO9	BBCABW
1	201829203	+	202.779	0.628217	0.803452	IPO9	VARR
1	201829205	+	271.734	0.625433	0.847584	IPO9	VARR
1	201955491	+	115.579	-0.268959	0.979535	TIMM17A	SSCAGC
1	201955503	+	2305	-0.372269	0.983215	TIMM17A	BA
1	201955506	+	1813.25	-0.245606	0.944878	TIMM17A	BA
1	201955515	+	711.961	-0.630646	0.929423	TIMM17A	BBCABW
1	201955520	+	174.97	-0.72497	0.922929	TIMM17A	BA
1	201982649	+	167.022	-0.0128804	0.958724	RNPEP	BA
1	201982652	+	158.035	0.926733	0.980456	RNPEP	BA
1	202341966	-	203.815	-0.481315	0.944747	UBE2T	BA
1	202808419	-	191.89	0.0286729	0.96347	KDM5B	BA
1	202808439	-	105.607	0.382428	0.859155	KDM5B	VARR
1	202889149	-	146.207	-0.303761	0.973123	RABIF	VARR
1	202927209	-	280.116	0.152132	0.937337	KLHL12	BA
1	202958312	-	459.334	0.0760378	0.980279	ADIPOR1	VARR
1	202967255	-	123.964	0.207269	0.92122	CYB5R1	BBCABW
1	203305519	+	322.095	-0.57188	0.880293	BTG2	BA
1	203861581	+	378.113	-0.40209	0.974651	SNRPE	BBCABW
1	203861583	+	222.261	0.0661429	0.929967	SNRPE	BA
1	203861603	+	10142.3	-0.0517693	0.951404	SNRPE	BA
1	203861610	+	1140.9	-0.449363	0.876298	SNRPE	VARR
1	203861611	+	461.943	-0.814439	0.866417	SNRPE	BA
1	203861621	+	1020.59	-0.718194	0.96938	SNRPE	BA
1	203861627	+	2115.2	-0.371178	0.982974	SNRPE	SSCAGC
1	203861650	+	472.203	0.0991926	0.944304	SNRPE	VARR
1	203861652	+	152.005	-0.328839	0.872711	SNRPE	BA
1	203861847	+	172.494	0.288655	0.73453	SNRPE	VARR
1	204411817	-	2941.74	0.443269	0.90877	PPP1R15B	BBCABW
1	204516406	+	460.186	0.482157	0.95	MDM4	BBCABW
1	204516409	+	464.312	0.114131	0.929758	MDM4	BA
1	205121975	-	1097.26	0.0448218	0.947778	RBBP5	BBCABW
1	205122003	-	253.108	0.469549	0.909976	RBBP5	BA
1	205750178	-	3385.96	-0.246906	0.902154	NUCKS1	BBCABW
1	205750182	-	9831.72	-0.232218	0.970798	NUCKS1	BA
1	205750186	-	225.536	-0.00357539	0.929412	NUCKS1	BA
1	205750202	-	138.022	0.285391	0.923739	NUCKS1	BBCABW
1	205750218	-	161.815	0.0614381	0.848485	NUCKS1	BA
1	205813160	-	197.7	0.435783	0.948925	SLC41A1	BA
1	205813188	-	179.931	0.356542	0.952218	SLC41A1	BA
1	205813198	-	491.479	0.0449596	0.956888	SLC41A1	BBCABW
1	206635536	+	202.973	-0.244587	0.942601	DYRK3	BBCABW
1	206635553	+	118.958	-0.175194	0.917362	DYRK3	BBCABW
1	207053248	+	100.258	0.300398	0.953488	PFKFB2	BBCABW
1	207321647	+	168.706	0.614961	0.949367	CD55	BBCABW
1	207321658	+	119.912	0.475138	0.940828	CD55	BA
1	207321684	+	331.847	0.0788782	0.957476	CD55	BA
1	207752066	+	286.297	-0.119495	0.963889	CD46	BA
1	207752072	+	227.416	0.00410926	0.932961	CD46	BA
1	207752083	+	273.155	-0.113071	0.964874	CD46	BA
1	207752086	+	739.652	-0.254059	0.865908	CD46	BA
1	207752109	+	351.864	0.84418	0.787608	CD46	BA
1	209827974	+	113.664	-1.29818	0.891892	UTP25	BBCABW
1	211675591	-	240.14	-0.846679	0.954397	NEK2	BBCABW
1	211675621	-	642.913	0.0460831	0.983728	NEK2	BA
1	211830763	-	192.709	0.691094	0.927835	LPGAT1	BBCABW
1	212035542	-	194.491	-0.22025	0.966387	INTS7	BA
1	212035544	-	155.915	-0.102223	0.93617	INTS7	BA
1	212035769	+	354.419	-0.679367	0.914082	DTL	BA
1	212035771	+	114.699	-0.578068	0.946798	DTL	BA
1	212035780	+	305.384	-0.467199	0.859403	DTL	BA
1	212035791	+	243.309	0.197153	0.89677	DTL	BA
1	212035793	+	1390.95	0.587757	0.902624	DTL	BA
1	212608761	+	522.557	0.301645	0.664557	ATF3	BBCABW
1	212791777	-	4427.14	0.0281701	0.952629	NSL1	BA
1	212791779	-	1448.28	-0.451882	0.953871	NSL1	BBCABW
1	212791793	-	181.282	-0.235858	0.979699	NSL1	BA
1	212858275	+	208.552	0.53811	0.95941	FLVCR1	VARR
1	212858277	+	282.213	0.769475	0.923077	FLVCR1	BA
1	212858283	+	441.051	0.793513	0.943089	FLVCR1	BA
1	212950594	+	183.298	0.331949	0.907591	VASH2	BA
1	213015744	-	108.141	0.155045	0.875556	ANGEL2	BA
1	213015776	-	118.608	-0.0230854	0.894843	ANGEL2	BA
1	213015867	-	173.331	-0.174829	0.952663	ANGEL2	BBCABW
1	213015872	-	108.78	-0.0601954	0.950423	ANGEL2	BA
1	214603195	+	319.334	-0.454827	0.974404	CENPF	VARR
1	214603214	+	289.495	-0.684692	0.948077	CENPF	BA
1	214603233	+	171.8	-0.163219	0.943118	CENPF	BBCABW
1	214603243	+	510.75	-0.253869	0.959184	CENPF	BA
1	215567304	+	370.456	0.377109	0.911464	KCTD3	BBCABW
1	215567375	+	177.132	0.412844	0.971519	KCTD3	VARR
1	217631067	-	275.533	0.4449	0.912396	GPATCH2	VARR
1	217631072	-	174.677	0.0570423	0.938804	GPATCH2	BA
1	218285293	+	1920.68	0.0791222	0.961243	RRP15	VARR
1	218285311	+	949.356	0.355086	0.818035	RRP15	BA
1	218285313	+	162.233	0.756304	0.875676	RRP15	VARR
1	219173850	+	126.584	0.240523	0.973054	LYPLAL1	BA
1	219173869	+	360.43	0.0842507	0.939398	LYPLAL1	BA
1	219173878	+	530.874	-0.228844	0.947269	LYPLAL1	BBCABW
1	219173884	+	142.349	-0.36098	0.983906	LYPLAL1	BA
1	219613105	-	164.506	0.442468	0.919811	ZC3H11B	BBCABW
1	220046418	-	127.689	-0.616123	0.949476	EPRS1	BA
1	220046440	-	1236.42	-0.187932	0.923572	EPRS1	BA
1	220046468	-	328.62	-1.00952	0.982262	EPRS1	BA
1	220046477	-	412.263	-0.446182	0.959099	EPRS1	BBCABW
1	220046483	-	208.261	-0.0332178	0.96338	EPRS1	BA
1	220046504	-	147.105	-0.451999	0.853293	EPRS1	VARR
1	220046508	-	165.326	-0.491018	0.963047	EPRS1	BA
1	220046530	-	216.958	-0.536745	0.950151	EPRS1	BBCABW
1	220089843	-	163.144	-0.310338	0.971178	BPNT1	BBCABW
1	220089761	-	260.504	-0.776273	0.915328	BPNT1	BA
1	220089788	-	1348.53	0.428663	0.926214	BPNT1	BA
1	220089792	-	233.134	-0.0912195	0.933146	BPNT1	BA
1	220089797	-	650.233	0.296938	0.846374	BPNT1	VARR
1	220089806	-	306.126	-0.271782	0.962712	BPNT1	BA
1	220089824	-	271.163	-0.623832	0.966884	BPNT1	BA
1	220094132	+	364.142	-0.230105	0.972782	IARS2	BA
1	220748323	+	285.35	-0.256792	0.947333	MTARC2	BBCABW
1	220786873	+	277.644	-0.24234	0.948936	MTARC1	BA
1	222618086	+	122.992	-0.251725	1	MIA3	BA
1	222618098	+	240.089	0.0421822	0.850515	MIA3	VARR
1	222618103	+	168.056	0.047308	0.991713	MIA3	BA
1	222618106	+	351.586	-0.16768	0.952255	MIA3	BA
1	222712490	-	157.323	0.303001	0.952906	AIDA	VARR
1	222712548	+	142.334	-0.29364	0.941406	BROX	BA
1	222712564	+	633.95	-0.163912	0.873913	BROX	BBCABW
1	222712588	+	237.864	-0.309306	0.947531	BROX	BA
1	223845954	-	120.264	0.0983571	0.923077	TP53BP2	BA
1	224114111	+	767.732	0.6465	0.920116	FBXO28	BA
1	224114115	+	190.216	0.959376	0.930435	FBXO28	BA
1	224114116	+	408.43	0.551596	0.973535	FBXO28	BA
1	224114119	+	488.853	0.44828	0.744186	FBXO28	VARR
1	224183240	+	2920.04	-1.17044	0.974975	DEGS1	BA
1	224183243	+	696.534	-1.05398	0.925159	DEGS1	BA
1	224183245	+	144.457	-1.37071	0.914474	DEGS1	BA
1	224330138	-	288.189	-0.153755	0.95983	NVL	VARR
1	224330139	-	1670.2	-0.0212119	0.879723	NVL	VARR
1	224330168	-	251.75	0.185989	0.963768	NVL	BA
1	224356860	+	240.471	-0.440527	0.976311	CNIH4	BA
1	224356879	+	696.847	-0.305564	0.98125	CNIH4	BA
1	224434797	-	1444.14	0.0766161	0.9375	WDR26	BBCABW
1	224929678	+	114.934	0.224445	0.965101	DNAH14	VARR
1	225428038	-	1234.96	0.635784	0.983029	LBR	BA
1	225428053	-	387.905	0.209388	0.897758	LBR	VARR
1	225428066	-	551.104	0.070818	0.961122	LBR	BA
1	225428088	-	221.619	0.312605	0.938272	LBR	VARR
1	225653100	-	340.335	0.362398	0.932914	ENAH	BA
1	225653122	-	299.529	0.14205	0.962536	ENAH	BA
1	225777822	+	194.85	0.338614	0.936585	SRP9	VARR
1	225777832	+	1784.67	0.13129	0.97731	SRP9	BA
1	225777849	+	154.814	-1.15209	0.967267	SRP9	BA
1	225882374	-	156.446	0.630677	0.942308	TMEM63A	BBCABW
1	225924169	-	257.549	0.404283	0.969735	PYCR2	BA
1	225924245	-	112.868	0.121712	0.932563	PYCR2	BA
1	225924250	-	319.097	0.00479536	0.956681	PYCR2	BA
1	225924266	-	258.986	0.396622	0.950858	ENSG00000255835	VARR
1	225924278	-	482.655	0.0841826	0.957521	ENSG00000255835	BA
1	225924280	-	124.238	0.042418	0.918434	ENSG00000255835	BA
1	225924282	-	449.44	-0.113156	0.969573	ENSG00000255835	VARR
1	225999322	-	430.7	0.203207	0.921514	SDE2	BA
1	225999343	-	763.07	-0.125793	0.903607	SDE2	BA
1	226062714	+	1388.58	0.224147	0.973559	H3-3A	BA
1	226062721	+	31450.8	-0.590593	0.933387	H3-3A	BA
1	226062722	+	334.504	-0.931315	0.71875	H3-3A	BA
1	226186720	-	383.9	0.365413	0.954268	ACBD3	BA
1	226186734	-	175.099	0.25101	0.989418	ACBD3	BA
1	226186741	-	688.011	-0.0612761	0.981315	ACBD3	BA
1	226309142	-	110.057	0.988342	0.817857	LIN9	VARR
1	226309162	-	105.538	0.876408	0.890647	LIN9	VARR
1	226309163	-	365.07	0.608099	0.878622	LIN9	VARR
1	226408031	-	112.597	-0.180227	0.944444	PARP1	VARR
1	226408082	-	1037.54	0.354334	0.945038	PARP1	VARR
1	226408085	-	1879.56	0.409338	0.986199	PARP1	BA
1	226408089	-	515.655	0.666306	0.953316	PARP1	BA
1	226408090	-	9053.96	0.838171	0.949856	PARP1	BA
1	226408093	-	3635.19	0.465142	0.980767	PARP1	BA
1	226408096	-	1726.24	0.512252	0.987804	PARP1	BA
1	226408100	-	137.183	0.107223	0.957663	PARP1	VARR
1	226870620	+	390.996	0.321204	0.9374	PSEN2	BA
1	226940294	+	404.44	0.846335	0.956102	COQ8A	BA
1	226940298	+	507.164	0.471204	0.96981	COQ8A	VARR
1	227318490	-	123.327	0.451395	0.920398	CDC42BPA	BA
1	227318492	-	554.456	0.471925	0.952571	CDC42BPA	BBCABW
1	227735239	-	118.109	0.131685	0.945344	JMJD4	BBCABW
1	227735303	-	340.735	-0.222014	0.940917	JMJD4	VARR
1	227735435	+	563.408	0.000539904	0.967073	SNAP47	BBCABW
1	228082708	+	5639.48	-0.146651	0.961698	ARF1	BA
1	228082717	+	3843.59	0.143438	0.967018	ARF1	BA
1	228082727	+	1761.76	0.0450755	0.970293	ARF1	BA
1	228082730	+	3799.57	0.456715	0.818775	ARF1	VARR
1	228082731	+	235.559	0.156338	0.680662	ARF1	VARR
1	228082732	+	220.6	0.312045	0.701016	ARF1	BA
1	228082733	+	206.663	0.610809	0.809179	ARF1	BA
1	228082736	+	712.698	0.0901281	0.571946	ARF1	BA
1	228082756	+	126.17	0.212844	0.908602	ARF1	BA
1	228103270	-	274.567	-0.358747	0.935076	C1orf35	VARR
1	228103301	-	313.498	-0.161184	0.86556	C1orf35	BA
1	228109281	-	204.396	-0.513441	0.982127	MRPL55	BA
1	228109273	-	163.914	-0.406653	0.984113	MRPL55	BA
1	228109261	-	161.184	-0.866835	0.948359	MRPL55	BBCABW
1	228109299	-	2267.05	-0.0443506	0.955459	MRPL55	BBCABW
1	228109323	-	263.415	-0.382927	0.969325	MRPL55	BBCABW
1	228140279	+	255.958	0.133765	0.941543	GUK1	BBCABW
1	228165804	+	800.677	0.45503	0.955236	IBA57	BBCABW
1	228406852	-	106.451	-0.0873858	0.952381	TRIM11	BBCABW
1	228457901	-	116.712	-0.601286	0.882576	H2AC25	BA
1	229342504	-	188.166	0.208484	0.978648	CCSAP	SSCAGC
1	229508298	-	717.2	0.446691	0.971601	NUP133	BA
1	229508305	-	106.373	0.0945144	0.836478	NUP133	VARR
1	229508310	-	156.017	0.0849068	0.991935	NUP133	VARR
1	229508323	-	412.262	0.651318	0.951689	NUP133	BA
1	229508331	-	444.994	-0.325151	0.966549	NUP133	BA
1	229508343	-	343.753	-0.0609397	0.984121	NUP133	BA
1	229508356	-	241.519	0.143864	0.98419	NUP133	BA
1	229508371	-	143.161	0.360299	0.940762	NUP133	BBCABW
1	229626056	-	172.587	1.07244	0.923977	TAF5L	BBCABW
1	229626204	+	189.233	0.352228	0.954802	URB2	VARR
1	229626225	+	103.708	-0.165458	0.932203	URB2	BA
1	230067235	+	125.641	-0.58682	0.983333	GALNT2	SSCAGC
1	230067238	+	549.457	-0.211178	0.951872	GALNT2	BA
1	230642481	+	226.379	-0.356799	0.926786	COG2	BA
1	230868521	-	230.394	-0.642031	0.860274	C1orf198	VARR
1	230978847	-	140.777	-0.0825644	0.95585	TTC13	BA
1	230979070	+	134.878	0.0493745	0.903658	ARV1	BBCABW
1	230979072	+	168.046	0.534383	0.951401	ARV1	VARR
1	230979081	+	149.444	-0.0289356	0.931198	ARV1	BA
1	230979089	+	135.641	-0.245238	0.92	ARV1	BA
1	230979094	+	1030.09	-0.162587	0.94533	ARV1	BBCABW
1	231241144	-	902.184	-0.0293236	0.963306	C1orf131	BA
1	231337852	-	1198.16	0.109253	0.942317	EXOC8	BBCABW
1	231338293	+	745.206	-0.413782	0.94791	SPRTN	BA
1	231422285	-	105.249	0.462757	0.940678	EGLN1	BA
1	231528599	-	135.089	-0.305814	0.954545	ENSG00000287856	BA
1	231528653	+	102.654	-0.0836818	0.918192	TSNAX-DISC1	BA
1	231528658	+	108.677	-0.482843	0.841063	TSNAX-DISC1	VARR
1	231528663	+	111.496	0.712919	0.823096	TSNAX	VARR
1	231528665	+	732.297	0.395044	0.970258	TSNAX	BA
1	231528675	+	1501.35	0.212429	0.927752	TSNAX	BBCABW
1	231528685	+	147.898	0.127598	0.907591	TSNAX	BA
1	231528700	+	366.3	0.0925875	0.942623	TSNAX	VARR
1	231528715	+	124.777	-0.338294	0.934406	TSNAX	VARR
1	234373456	+	1338.02	0.164284	0.910835	COA6	BA
1	234373460	+	168.758	0.43297	0.939525	COA6	VARR
1	234373465	+	147.002	0.357471	0.934365	COA6	BA
1	234373486	+	320.61	0.189586	0.823841	COA6	VARR
1	234610176	-	261.403	0.353845	0.947185	IRF2BP2	BA
1	234610184	-	123.065	0.461437	0.878788	IRF2BP2	VARR
1	235128871	-	1446.06	-0.179274	0.927738	TOMM20	BA
1	235161242	-	181.789	-0.182731	0.891949	RBM34	BA
1	235161256	-	304.601	-0.704358	0.955822	RBM34	SSCAGC
1	235328168	-	602.74	0.23023	0.931452	ARID4B	BBCABW
1	235328181	-	199.275	0.554723	0.900826	ARID4B	BA
1	235328570	+	2961.13	0.0897877	0.952879	ENSG00000285053	BBCABW
1	235328589	+	443.991	0.261134	0.952117	GGPS1	BBCABW
1	235367430	+	450.601	-0.0465217	0.975825	TBCE	BA
1	235367438	+	195.251	0.342317	0.975989	TBCE	VARR
1	235367455	+	661.83	-0.269083	0.93653	TBCE	BBCABW
1	235504387	-	119.113	-0.0441367	0.976471	B3GALNT2	BA
1	236065090	-	502.761	-0.137473	0.944328	NID1	BBCABW
1	236065141	-	288.937	-0.256652	0.936275	NID1	BA
1	236281958	-	233.982	-0.214729	0.922173	ERO1B	BBCABW
1	236604485	-	123.53	-0.0680705	0.966387	HEATR1	BA
1	236604503	-	114.289	-0.253423	0.761057	HEATR1	VARR
1	236604516	-	823.32	-0.328767	0.941638	HEATR1	BA
1	236604528	-	218.728	0.060734	0.909753	HEATR1	BA
1	236604538	-	134.251	0.0865823	0.940104	HEATR1	VARR
1	236604562	-	575.132	-0.13452	0.907759	HEATR1	BBCABW
1	236795281	+	144.71	0.612935	0.963542	MTR	BA
1	236795292	+	826.638	0.407025	0.968676	MTR	BA
1	236795310	+	583.06	0.0452634	0.949755	MTR	VARR
1	236795312	+	566.478	-0.238104	0.955789	MTR	VARR
1	236795319	+	222.682	0.0623373	0.900518	MTR	BA
1	241519711	-	247.489	-0.857259	0.926175	FH	BA
1	241519718	-	192.679	-0.146802	0.944206	FH	BA
1	241519722	-	729.39	0.246692	0.935743	FH	BA
1	241519725	-	332.525	-0.808439	0.984038	FH	BA
1	241519738	-	205.654	0.180064	0.957205	FH	VARR
1	241519749	-	558.563	-0.103493	0.974322	FH	VARR
1	241519751	-	273.479	-0.261523	0.981731	FH	BA
1	241640369	-	144.552	-0.0970955	0.925307	OPN3	BBCABW
1	241848191	+	527.14	0.757208	0.945344	EXO1	VARR
1	241848204	+	684.231	-0.123295	0.979579	EXO1	BA
1	241848223	+	247.899	-0.377096	0.945705	EXO1	BA
1	241848227	+	252.344	0.297872	0.914399	EXO1	VARR
1	243255203	-	151.948	-0.206041	0.91866	CEP170	BA
1	243255261	-	187.341	0.311036	0.955128	CEP170	BBCABW
1	244451876	-	174.896	-0.42168	0.902113	ADSS2	BBCABW
1	244451881	-	729.853	-0.29174	0.920634	ADSS2	BA
1	244451886	-	325.821	-0.0926236	0.823113	ADSS2	BA
1	244451903	-	264.72	0.389839	0.805217	ADSS2	BA
1	244653073	+	116.331	-0.0975468	0.878788	DESI2	BA
1	244653078	+	100.689	0.0824511	0.954545	DESI2	VARR
1	244653087	+	371.691	0.415402	0.975309	DESI2	BA
1	244653104	+	271.971	0.521495	0.958498	DESI2	BA
1	244653126	+	303.404	-0.304053	0.967273	DESI2	VARR
1	244835686	+	121.295	-0.752059	0.9375	COX20	VARR
1	244862970	-	218.102	0.101095	0.88959	HNRNPU	BBCABW
1	244862998	-	128.938	-0.358727	0.834951	HNRNPU	BA
1	244863000	-	260.617	-0.00469687	0.941176	HNRNPU	BA
1	244864476	-	736.477	0.275846	0.632479	HNRNPU	BA
1	244864477	-	1116.47	0.0445525	0.479862	HNRNPU	BA
1	244864480	-	803.182	-0.0469554	0.922261	HNRNPU	VARR
1	244864481	-	400.143	0.430486	0.531511	HNRNPU	VARR
1	244864482	-	2597.75	0.0449932	0.611958	HNRNPU	VARR
1	244864491	-	2138.06	0.105371	0.93571	HNRNPU	BA
1	244864512	-	169.31	-0.00849769	0.923188	HNRNPU	BA
1	244864517	-	2560.62	0.130656	0.893114	HNRNPU	VARR
1	244864539	-	1738.11	0.0834019	0.94316	HNRNPU	BA
1	244864542	-	6115.1	0.0729423	0.944354	HNRNPU	VARR
1	244864544	-	3025.31	0.0738242	0.87453	HNRNPU	VARR
1	244864567	-	254.132	0.136675	0.878788	HNRNPU	BA
1	244864570	-	615.148	0.0617003	0.951644	HNRNPU	BA
1	244864572	-	192.802	0.294355	0.963415	HNRNPU	BA
1	244970390	+	109.399	-0.427499	0.978967	EFCAB2	BA
1	246566208	-	104.612	0.444819	0.82337	TFB2M	BA
1	246566225	-	104.54	1.10754	0.958231	TFB2M	VARR
1	246566227	-	248.559	0.548002	0.941176	TFB2M	BA
1	246566254	-	177.227	0.0986133	0.933457	TFB2M	BA
1	246566261	-	671.074	0.0101304	0.919174	TFB2M	BA
1	248859085	-	104.368	0.165506	0.918221	ZNF692	BBCABW
2	264900	+	1385.58	-0.784638	0.959505	ACP1	BBCABW
2	677389	-	118.498	-0.68077	0.918367	TMEM18	VARR
2	677436	-	184.208	-0.0736443	0.96355	TMEM18	BA
2	677454	-	211.037	0.710725	0.937294	TMEM18	VARR
2	3377852	-	117.666	0.401269	0.95302	EIPR1	BBCABW
2	3379722	+	215.104	-0.144594	0.981273	TRAPPC12	VARR
2	3519530	-	254.385	-0.409286	0.826531	ADI1	BA
2	3519552	-	148.343	0.0619317	0.955224	ADI1	BA
2	3558360	-	234.78	0.224784	0.975	RNASEH1	BA
2	3575233	+	457.448	-0.378439	0.900774	RPS7	BBCABW
2	3575296	+	160.27	-0.364597	0.954371	RPS7	BA
2	3575315	+	1418.51	-0.160015	0.973919	RPS7	VARR
2	3575333	+	285.756	-0.0623256	0.895442	RPS7	BA
2	3575348	+	156.55	0.759127	0.762468	RPS7	VARR
2	3575376	+	113.372	-0.327987	0.949296	RPS7	VARR
2	8682056	+	18514.9	0.410794	0.80562	ID2	BBCABW
2	8837597	-	141.798	-0.0945194	0.941552	KIDINS220	VARR
2	8837598	-	148.604	0.315675	0.933333	KIDINS220	VARR
2	8837613	-	571.38	-0.488944	0.956101	KIDINS220	BBCABW
2	9423456	-	268.117	-0.328416	0.962987	ITGB1BP1	BA
2	9423528	-	150.243	-0.0356726	0.967366	ITGB1BP1	BBCABW
2	9423631	+	159.792	-0.445734	0.940072	CPSF3	BA
2	9423648	+	138.863	0.167263	0.922515	CPSF3	BA
2	9423656	+	193.408	0.0311871	0.905622	CPSF3	VARR
2	9423657	+	741.892	0.0372273	0.935473	CPSF3	BA
2	9555725	-	137.096	-0.114488	0.79375	ADAM17	VARR
2	9555755	-	183.393	0.164239	0.925	ADAM17	BA
2	9630969	-	3220.77	-0.234723	0.945359	YWHAQ	BA
2	9630980	-	714.043	0.332065	0.94488	YWHAQ	VARR
2	9630985	-	623.813	-0.0715205	0.968893	YWHAQ	VARR
2	9630991	-	1407.36	0.122381	0.935742	YWHAQ	VARR
2	9630997	-	4777.57	0.121313	0.978962	YWHAQ	BA
2	9631001	-	935.133	0.097221	0.97831	YWHAQ	BA
2	9631010	-	244.915	0.90502	0.933966	YWHAQ	VARR
2	9843505	+	153.395	0.589612	0.9375	TAF1B	BA
2	10122712	+	236.174	0.133409	0.874126	RRM2	BA
2	10689975	-	1361.71	0.0848056	0.954903	NOL10	BA
2	10689978	-	197.191	0.168766	0.988333	NOL10	BA
2	10812715	-	168.913	0.0592217	0.946921	PDIA6	BA
2	10812720	-	141.51	-0.0264777	0.942186	PDIA6	BA
2	10812747	-	379.76	-0.321125	0.967581	PDIA6	VARR
2	10812754	-	410.557	-0.0703737	0.840764	PDIA6	BA
2	10812782	-	116.228	0.203966	0.970414	PDIA6	BA
2	15591868	+	309.194	-1.30666	0.959936	DDX1	BBCABW
2	15591906	+	392.682	-0.433652	0.965368	DDX1	VARR
2	17753806	-	179.748	-0.426429	0.957493	SMC6	BA
2	18560651	-	109.171	0.408318	0.907176	RDH14	BA
2	19901947	-	107.477	-0.325026	0.928832	TTC32	BA
2	19901986	-	190.445	-0.0125857	0.952636	TTC32	BBCABW
2	20051626	-	155.828	-0.359371	0.935929	LAPTM4A	VARR
2	20051653	-	417.869	-0.197275	0.920973	LAPTM4A	VARR
2	20051663	-	137.262	-0.238644	0.981413	LAPTM4A	VARR
2	20051671	-	213.749	-0.0888494	0.949153	LAPTM4A	VARR
2	20051678	-	109.828	0.182549	0.898089	LAPTM4A	BBCABW
2	20350834	-	142.995	0.348378	0.909605	PUM2	VARR
2	20350817	-	223.464	0.64123	0.931472	PUM2	BA
2	20350664	-	119.138	0.169836	0.928571	PUM2	VARR
2	20447074	+	6531.99	0.37872	0.773183	RHOB	BA
2	20823101	-	149.956	-0.723851	0.955679	LDAH	BBCABW
2	24047381	-	105.428	-0.474422	0.906731	WDCP	BA
2	24047391	-	420.175	-0.0821088	0.945063	WDCP	BA
2	24049743	+	103.093	0.306741	0.931373	FKBP1B	BBCABW
2	24076232	-	131.2	0.0339817	0.915105	SF3B6	VARR
2	24076243	-	290.194	-0.324525	0.986354	SF3B6	BA
2	24076249	-	141.509	-0.295824	0.97227	SF3B6	BA
2	24076264	-	436.282	-0.396227	0.927211	SF3B6	BBCABW
2	24076273	-	110.605	-0.489236	0.904103	SF3B6	VARR
2	24076313	-	412.838	0.361363	0.956398	SF3B6	BA
2	24076322	-	112.796	-0.0943979	0.910619	SF3B6	BA
2	24076328	-	940.12	-0.0439429	0.922184	SF3B6	BA
2	24076347	-	696.162	-0.345631	0.96725	SF3B6	BA
2	24076349	-	111.004	0.0575313	0.928691	SF3B6	BA
2	24076350	-	1039.37	0.36472	0.972508	SF3B6	BA
2	24076360	-	446.103	-0.508866	0.919626	SF3B6	BA
2	24076370	-	136.564	-0.0963723	0.953459	SF3B6	VARR
2	24076376	-	309.871	0.516415	0.950435	SF3B6	BA
2	24793425	+	134.452	0.409149	0.860072	CENPO	VARR
2	24793446	+	102.598	-0.31864	0.948637	CENPO	BA
2	25878464	-	161.241	0.364351	0.890796	ASXL2	BA
2	25878487	-	156.694	0.0532652	0.895935	ASXL2	BBCABW
2	26034089	+	178.551	-0.49851	0.95858	RAB10	VARR
2	26034100	+	200.965	0.138933	0.893617	RAB10	BA
2	26034118	+	373.802	-0.0503718	0.88184	RAB10	BA
2	26034124	+	105.911	0.869758	0.861678	RAB10	VARR
2	26244604	-	350.816	-0.327598	0.985985	HADHA	BA
2	26244619	-	839.733	-0.507426	0.97065	HADHA	BBCABW
2	26244632	-	936.516	-0.747362	0.961012	HADHA	BA
2	26244928	+	456.534	-0.212915	0.987897	HADHB	BA
2	26244939	+	1329.17	0.0259244	0.980899	HADHB	BA
2	26346131	+	116.9	-0.197186	0.958115	SELENOI	SSCAGC
2	26346136	+	187.447	0.290591	0.950843	SELENOI	BBCABW
2	26346146	+	845.392	0.334667	0.971104	SELENOI	BA
2	26764321	+	162.105	0.393786	0.914286	SLC35F6	BA
2	26786058	+	115.222	0.0553185	0.932353	CENPA	BA
2	26786067	+	392.034	0.842487	0.953362	CENPA	VARR
2	26786071	+	184.157	0.0457841	0.928731	CENPA	BA
2	27051668	+	203.914	0.669291	0.985178	AGBL5	BA
2	27071649	-	1028.74	-0.838367	0.971555	OST4	BA
2	27071658	-	716.875	-0.270706	0.979477	OST4	VARR
2	27071669	-	437.457	-0.621794	0.974263	OST4	BA
2	27071673	-	142.663	0.222936	0.981206	OST4	BA
2	27134620	-	116.954	0.373759	0.9375	PREB	BA
2	27134636	-	248.712	-0.073561	0.929099	PREB	BBCABW
2	27211946	-	112.052	-0.475627	0.8867	SLC5A6	VARR
2	27212361	+	960.955	-0.116038	0.970133	ATRAID	BA
2	27217369	+	335.165	-0.427786	0.905109	CAD	BBCABW
2	27323070	-	121.602	-0.457892	0.867659	MPV17	VARR
2	27323090	-	130.481	-0.775297	0.96729	MPV17	BA
2	27323097	-	236.487	-0.479596	0.978599	MPV17	BA
2	27356764	-	971.832	-0.300267	0.963914	GTF3C2	BA
2	27356776	-	293.996	0.254178	0.955794	GTF3C2	BA
2	27370615	+	292.693	0.152501	0.927437	SNX17	BBCABW
2	27370617	+	385.374	0.0491861	0.978855	SNX17	BA
2	27370627	+	161.083	0.00034177	0.93437	SNX17	VARR
2	27370636	+	235.1	0.772663	0.702128	SNX17	VARR
2	27409591	-	420.091	-0.492277	0.931546	PPM1G	BBCABW
2	27428626	+	409.293	0.015634	0.944516	NRBP1	BBCABW
2	27489743	-	217.195	-0.19687	0.964392	IFT172	BBCABW
2	27629050	+	210.695	-0.0491599	0.862548	GPN1	VARR
2	27663609	-	968.467	-0.04257	0.963603	SUPT7L	BA
2	27663614	-	440.258	-0.074687	0.969391	SUPT7L	BA
2	27663636	-	137.81	0.199978	0.92509	SUPT7L	VARR
2	27663891	+	237.278	0.235627	0.933263	SLC4A1AP	BA
2	27771719	+	453.953	-0.213919	0.964468	MRPL33	BA
2	27771758	+	125.692	-0.627409	0.964881	MRPL33	BA
2	27771765	+	721.353	-0.418682	0.94299	MRPL33	VARR
2	28751910	+	111.971	1.02565	0.948387	PPP1CB	BA
2	28751914	+	286.22	1.06926	0.965879	PPP1CB	BA
2	28751918	+	230.127	0.901061	0.957396	PPP1CB	BA
2	28752043	+	157.26	-0.442722	0.95	PPP1CB	VARR
2	28752045	+	107.245	-0.0570704	0.917647	PPP1CB	BA
2	28752104	+	221.807	0.182184	0.888889	PPP1CB	VARR
2	28752107	+	538.65	0.102751	0.96482	PPP1CB	VARR
2	28870277	-	102.257	-0.0884255	0.903448	TRMT61B	BA
2	28870280	-	138.49	-0.461284	0.906722	TRMT61B	BA
2	28870309	-	252.759	-0.0856901	0.938263	TRMT61B	BBCABW
2	28894619	+	121.421	-0.163208	0.949239	WDR43	BBCABW
2	28894665	+	121.471	0.305219	0.935919	WDR43	BA
2	28894681	+	210.455	-0.69284	0.965447	WDR43	BA
2	28894690	+	1421.96	-0.543846	0.948435	WDR43	BA
2	28894695	+	151.02	-0.119797	0.923077	WDR43	BA
2	30146975	+	103.969	0.46135	0.925865	YPEL5	BA
2	30147007	+	221.484	-0.0541229	0.935043	YPEL5	BBCABW
2	30447221	+	142.708	0.323285	0.984293	LCLAT1	VARR
2	30447224	+	118.765	0.296638	0.95679	LCLAT1	BA
2	30447243	+	401.588	0.137866	0.966797	LCLAT1	BBCABW
2	30447246	+	586.779	-0.0419418	0.966339	LCLAT1	BA
2	30447276	+	469.275	-0.0355546	0.921976	LCLAT1	BA
2	32039805	-	383.862	-0.456064	0.945747	DPY30	BA
2	32039809	-	421.544	0.0846728	0.960447	DPY30	BBCABW
2	32039816	-	145.724	-0.0881068	0.974684	DPY30	BA
2	32039827	-	233.332	-0.273684	0.959922	DPY30	BBCABW
2	32165864	+	1762.93	0.0271251	0.98252	SLC30A6	BA
2	32165882	+	580.619	-0.224672	0.978161	SLC30A6	BA
2	32277907	+	369.621	0.518288	0.935724	YIPF4	BBCABW
2	32277913	+	140.471	0.301161	0.91047	YIPF4	BA
2	32357216	+	108.821	0.602181	0.92344	BIRC6	BBCABW
2	32628035	+	219.47	0.167583	0.957494	TTC27	BA
2	32628096	+	349.538	-0.264686	0.957023	TTC27	VARR
2	33599227	-	276.439	-0.175888	0.893115	FAM98A	BA
2	33599229	-	327.828	-0.295143	0.907889	FAM98A	BA
2	33599284	-	143.519	-0.169086	0.935484	FAM98A	BA
2	33599291	-	248.756	-0.209865	0.874866	FAM98A	BA
2	37084518	+	114.599	0.0985192	0.840816	GPATCH11	BA
2	37084536	+	444.473	-0.480575	0.892188	GPATCH11	BA
2	37196492	+	206.166	-0.553042	0.951456	CEBPZOS	BA
2	37196498	+	1840.93	-0.48705	0.973319	CEBPZOS	BBCABW
2	37231581	-	110.391	-0.0633779	0.91129	CEBPZ	BA
2	37231589	-	606.725	-0.0241384	0.942301	CEBPZ	BA
2	37324726	-	146.582	-0.134723	0.932749	PRKD3	BA
2	37324730	-	159.124	-0.259154	0.938742	PRKD3	BA
2	37324772	-	197.361	0.085648	0.964539	PRKD3	BA
2	37671642	-	103.284	0.0406921	0.960938	CDC42EP3	BBCABW
2	38377273	-	949.879	0.470615	0.960748	ATL2	BA
2	38377279	-	133.513	0.464767	0.889241	ATL2	BA
2	38377290	-	153.701	-0.155039	0.894192	ATL2	BBCABW
2	38602922	-	254.198	0.250106	0.994048	HNRNPLL	BA
2	38602928	-	152.081	0.182896	0.980296	HNRNPLL	BA
2	38751359	-	3536.55	-0.0690323	0.923371	SRSF7	BA
2	38778206	+	110.178	-0.357467	0.894807	GEMIN6	VARR
2	38778221	+	298.21	1.29727	0.933866	GEMIN6	BA
2	38875908	-	114.504	-0.524844	0.98543	DHX57	BA
2	38875921	-	113.478	-0.166512	0.929735	DHX57	BA
2	38875934	-	188.449	-0.211028	0.974775	DHX57	VARR
2	38875996	+	328.575	-0.103006	0.984733	MORN2	SSCAGC
2	38876003	+	223.433	0.225236	0.943005	MORN2	VARR
2	39121035	-	134.4	0.110895	0.951952	SOS1	BBCABW
2	39121051	-	125.935	0.717701	0.901681	SOS1	BBCABW
2	39437278	-	215.052	0.664612	0.922984	MAP4K3	BA
2	39779258	-	226.684	0.137956	0.713158	THUMPD2	VARR
2	43226605	-	157.677	1.18528	0.887097	ZFP36L2	BA
2	43596038	-	161.069	-0.671258	0.980892	THADA	BA
2	43774039	+	153.269	-0.391576	0.977316	DYNC2LI1	BA
2	43774049	+	204.168	-0.467307	0.960432	DYNC2LI1	BBCABW
2	43774055	+	182.152	0.0711087	0.927746	DYNC2LI1	BA
2	43774057	+	102.399	0.25977	0.975078	DYNC2LI1	BA
2	43774081	+	116.328	0.1731	0.966474	DYNC2LI1	BA
2	43995958	-	676.738	0.49653	0.965588	LRPPRC	BA
2	43996005	-	297.923	-0.364945	0.965452	LRPPRC	BBCABW
2	44168877	+	366.522	0.946377	0.772093	PPM1B	VARR
2	44361546	-	209.389	0.193541	0.961706	PREPL	VARR
2	44361492	-	760.963	-0.207218	0.963315	PREPL	BA
2	44361521	-	145.538	-0.175183	0.940815	PREPL	BA
2	44361561	-	103.9	0.217939	0.959471	PREPL	BA
2	46542702	+	281.929	1.06115	0.965937	RHOQ	VARR
2	46542736	+	141.783	0.371771	0.880435	RHOQ	BA
2	46617008	-	221.725	0.0441356	0.943431	PIGF	BBCABW
2	46617201	+	125.467	0.106902	0.921336	CRIPT	BA
2	46617202	+	198.753	-0.118897	0.958904	CRIPT	BA
2	46617204	+	201.056	-0.0792963	0.922974	CRIPT	BA
2	46617210	+	253.35	-0.0584542	0.927215	CRIPT	VARR
2	46617217	+	500.675	0.373432	0.940133	CRIPT	BA
2	46617232	+	226.894	-0.319189	0.977049	CRIPT	BA
2	46915761	-	251.074	0.137771	0.93856	MCFD2	BA
2	46915794	-	140.845	-0.236455	0.957627	MCFD2	VARR
2	46915795	-	281.401	0.135797	0.94717	MCFD2	VARR
2	47176511	-	9812.55	-0.656073	0.94237	CALM2	BA
2	47176514	-	1557.01	-0.444984	0.936267	CALM2	BA
2	47176515	-	1444.78	-0.243683	0.922229	CALM2	BA
2	47403130	+	161.009	0.251518	0.93019	MSH2	VARR
2	47403158	+	508.462	0.405431	0.955378	MSH2	BBCABW
2	47403167	+	253.349	-0.140822	0.979749	MSH2	BA
2	47403171	+	204.413	-0.30436	0.945946	MSH2	VARR
2	47783145	+	2995.19	0.0387287	0.967091	MSH6	BA
2	47783147	+	229.905	0.220669	0.911409	MSH6	BA
2	47783174	+	238.584	-0.0200988	0.968347	MSH6	BA
2	47783205	+	296.837	0.268598	0.963012	MSH6	VARR
2	53767804	+	345.652	0.0480103	0.95534	CHAC2	BA
2	53767824	+	254.321	-0.524913	0.91455	CHAC2	BBCABW
2	53767862	+	165.92	-0.0364713	0.861582	CHAC2	BBCABW
2	53786878	-	108.685	-0.139567	0.97313	ASB3	SSCAGC
2	53970993	-	272.1	0.176486	0.898305	PSME4	BA
2	53971016	-	170.084	-0.285281	0.987552	PSME4	BA
2	54456327	+	100.406	-0.470434	0.94685	SPTBN1	BBCABW
2	55050451	-	905.513	0.256911	0.918468	RTN4	BBCABW
2	55050497	-	120.312	-0.0850728	0.958042	RTN4	VARR
2	55050499	-	183.778	-0.165156	0.936842	RTN4	BA
2	55050507	-	146.388	0.271926	0.912	RTN4	VARR
2	55050524	-	132.405	-0.375063	0.979058	RTN4	BA
2	55050535	-	441.798	-0.0354752	0.947839	RTN4	BBCABW
2	55050562	-	165.924	0.307893	0.948052	RTN4	VARR
2	55232702	+	127.398	-1.05561	0.972411	RPS27A	BA
2	55269193	-	247.178	-0.31616	0.965026	MTIF2	BA
2	55269231	-	370.031	0.0825357	0.948529	MTIF2	BA
2	55269217	-	358.742	0.0436256	0.97094	MTIF2	BA
2	55419837	-	113.695	0.238213	0.957895	CCDC88A	BA
2	55419839	-	343.136	0.695	0.956522	CCDC88A	BBCABW
2	55519674	+	102.227	-0.591051	0.965649	CFAP36	BA
2	55617595	-	113.337	0.23506	0.932675	PPP4R3B	BA
2	55617702	-	119.055	0.219339	0.950769	PPP4R3B	BA
2	58241323	-	411.089	-0.443984	0.949085	FANCL	BA
2	58241346	-	219.121	0.281135	0.957811	FANCL	BA
2	60756266	+	196.808	0.18689	0.971501	PAPOLG	BBCABW
2	60756268	+	470.691	0.142048	0.898724	PAPOLG	BA
2	60756294	+	127.773	0.686906	0.933135	PAPOLG	BBCABW
2	60756323	+	117.22	0.0318338	0.891156	PAPOLG	BBCABW
2	61145116	+	275.017	-1.00416	0.96534	C2orf74	BA
2	61538219	-	139.528	-0.25468	0.95935	XPO1	BA
2	61538186	-	157.04	0.175651	0.910658	XPO1	BA
2	61538189	-	202.064	-0.118915	0.953189	XPO1	BA
2	61538206	-	128.443	-0.309419	0.903807	XPO1	BA
2	61538216	-	548.467	-0.0535865	0.954958	XPO1	BA
2	61538222	-	105.243	-0.100404	0.921002	XPO1	VARR
2	61538234	-	331	-0.551241	0.957006	XPO1	BA
2	61538246	-	430.505	0.444535	0.923404	XPO1	VARR
2	61538298	-	334.403	0.400189	0.890947	XPO1	BBCABW
2	61538317	-	114.066	0.429778	0.745665	XPO1	BA
2	61538323	-	221.744	0.673033	0.870994	XPO1	VARR
2	61538324	-	831.979	0.544533	0.930499	XPO1	VARR
2	61538349	-	301.206	-0.0969964	0.953046	XPO1	VARR
2	61538356	-	199.438	-0.0281122	0.943771	XPO1	VARR
2	61888522	-	351.611	-0.311799	0.947774	CCT4	BA
2	61888526	-	196.806	-0.166342	0.981405	CCT4	BA
2	61888549	-	430.174	-0.995523	0.972727	CCT4	BA
2	61888559	-	100.666	-0.142152	0.924528	CCT4	BA
2	61888562	-	941.3	-0.232763	0.979226	CCT4	BA
2	61888577	-	206.124	-0.587417	0.884334	CCT4	BA
2	61888580	-	1966.06	-0.226216	0.947187	CCT4	BA
2	61888586	-	445.463	0.243922	0.932843	CCT4	BA
2	61888593	-	208.974	0.0510334	0.712142	CCT4	VARR
2	61888597	-	3858.93	0.0964829	0.93947	CCT4	BBCABW
2	61888602	-	211.322	0.0454864	0.83808	CCT4	VARR
2	61888612	-	857.445	0.359823	0.855228	CCT4	VARR
2	61905674	+	298.985	-0.215634	0.978056	COMMD1	BA
2	62196115	+	140.705	0.213975	0.905405	B3GNT2	BA
2	62705713	+	149.555	-0.531578	0.912837	EHBP1	BA
2	62705719	+	106.991	-0.293315	0.909853	EHBP1	VARR
2	63588968	+	1876.4	-0.594333	0.952873	MDH1	BBCABW
2	63588979	+	1082.32	-0.570834	0.963475	MDH1	BA
2	63589005	+	282.038	-0.187965	0.927507	MDH1	BBCABW
2	63589012	+	170.839	0.249622	0.956836	MDH1	BBCABW
2	64144420	-	195.665	-0.241297	0.954451	PELI1	BBCABW
2	65130106	-	1721.28	-0.0364359	0.938136	RAB1A	BBCABW
2	65130128	-	270.918	0.0526224	0.936341	RAB1A	BA
2	65227826	+	188.085	-0.183605	0.960784	ACTR2	VARR
2	65227833	+	329.372	-0.231749	0.904306	ACTR2	VARR
2	65227839	+	308.532	-0.0436243	0.643886	ACTR2	VARR
2	65227840	+	193.568	-0.270372	0.834515	ACTR2	VARR
2	65227847	+	417.157	0.496505	0.890656	ACTR2	VARR
2	66435125	+	173.589	-0.0855365	0.911011	MEIS1	BA
2	66435169	+	117.914	0.0356687	0.93774	MEIS1	BA
2	67397333	+	149.925	0.142718	0.888172	ETAA1	BA
2	67397340	+	350.499	0.856287	0.847534	ETAA1	VARR
2	68063004	-	819.925	0.574346	0.978807	C1D	BA
2	68063013	-	168.431	0.462624	0.952618	C1D	BBCABW
2	68157922	+	280.185	0.33895	0.95082	PNO1	BA
2	68252497	-	1237.63	0.335819	0.887137	PPP3R1	BBCABW
2	69013357	+	562.685	0.540964	0.987179	ANTXR1	BA
2	69387226	-	130.403	0.418416	0.594828	GFPT1	VARR
2	69437435	-	611.504	0.0824343	0.938897	NFU1	BBCABW
2	69893956	+	871.495	-0.0196376	0.954172	SNRNP27	BBCABW
2	69893958	+	606.262	-0.0473707	0.966049	SNRNP27	BA
2	69893978	+	229.794	0.112578	0.972119	SNRNP27	BA
2	69893983	+	209.544	0.0548927	0.925359	SNRNP27	VARR
2	70087477	+	2119	0.475007	0.942238	PCBP1	BA
2	70248578	-	603.634	-0.243367	0.913013	TIA1	BA
2	70248615	-	349.757	0.027834	0.917582	C2orf42	BA
2	70248622	-	167.225	0.211062	0.96011	TIA1	BA
2	70248660	-	111.543	1.15216	0.96633	TIA1	BA
2	70258143	+	203.605	-0.222283	0.974823	PCYOX1	SSCAGC
2	70258149	+	110.622	-0.470881	0.972056	PCYOX1	BA
2	70293675	-	2341.8	-0.324248	0.968616	SNRPG	BA
2	70293679	-	199.132	-0.370417	0.801985	SNRPG	VARR
2	70293680	-	4011.4	0.0173324	0.895146	SNRPG	VARR
2	70293700	-	211.773	0.314942	0.901703	SNRPG	VARR
2	70293703	-	260.815	0.211456	0.515676	SNRPG	VARR
2	70293709	-	575.389	-0.100218	0.952403	SNRPG	BA
2	70293715	-	1626.96	-0.268592	0.967773	SNRPG	BA
2	70293717	-	975.819	-0.267745	0.930143	SNRPG	BA
2	70293728	-	167.061	-0.0690721	0.932515	SNRPG	BA
2	70293730	-	664.893	0.149116	0.959149	SNRPG	VARR
2	70293731	-	507.895	0.133911	0.965682	SNRPG	VARR
2	70293737	-	2109.51	-0.0316193	0.966872	SNRPG	BA
[truncated: 11,999 more rows]

## Sheet: A549_m6Am_bins
Chr	Position (hg38, 1-based)	Strand	baseMean	log2FoldChange	m6Am level (A549)	m6Am level bin	Gene
1	1020120	+	133.676	-0.30434	0.980843	80-100th	AGRN		Statistics for m6Am level (A549)
1	1231972	-	123.797	0.856382	0.802469	0-20th	SDF4			Count	Mean	Std	Min	25-percentile	Median	75-percentile	Max
1	1231981	-	120.198	0.470712	0.974219	60-80th	SDF4		Bin
1	1324653	-	100.675	0.0423753	0.984375	80-100th	INTS11		0-20th	481	0.80315	0.120294	0.138792	0.772727	0.85034	0.880093	0.900552
1	1375200	-	124.819	0.049084	0.955975	40-60th	AURKAIP1		20-40th	738	0.927404	0.0111744	0.900554	0.919761	0.929363	0.937048	0.942568
1	1407278	-	105.656	1.09491	0.953866	40-60th	MRPL20		40-60th	973	0.953782	0.00579375	0.94259	0.94898	0.954182	0.958957	0.962816
1	1407293	-	246.087	0.501646	0.970445	60-80th	MRPL20		60-80th	1212	0.971152	0.00457338	0.962828	0.967428	0.971359	0.975113	0.978895
1	1512162	+	113.993	-0.379168	0.952096	40-60th	ATAD3A		80-100th	1087	0.986851	0.00562756	0.97892	0.982158	0.985967	0.990196	1
1	1891070	-	153.113	0.118652	0.989247	80-100th	GNB1
1	1891087	-	163.402	-0.0357825	0.839552	0-20th	GNB1		Student's t-test
1	2194772	-	130.271	-0.322836	0.980707	80-100th	FAAP20					P-value
1	2391842	+	196.146	0.0795278	0.981651	80-100th	RER1		0-20th	vs	20-40th	0.251104
1	6199588	-	125.202	0.344352	0.973525	60-80th	RPL22		0-20th	vs	40-60th	0.415268
1	6393377	-	163.737	-0.145819	0.954128	40-60th	ACOT7		0-20th	vs	60-80th	0.516746
1	7961681	+	198.199	-0.276883	0.809249	0-20th	PARK7		0-20th	vs	80-100th	0.00475986
1	8878644	-	669.198	-0.827985	0.942063	20-40th	ENO1		20-40th	vs	40-60th	0.44252
1	8878683	-	3249.49	-0.558606	0.979546	80-100th	ENO1		20-40th	vs	60-80th	0.278503
1	8878686	-	15132.3	-0.279371	0.966416	60-80th	ENO1		20-40th	vs	80-100th	0.23948
1	8878688	-	2804.61	-0.389277	0.960433	40-60th	ENO1		40-60th	vs	60-80th	0.744334
1	8878709	-	616.475	0.25251	0.891498	0-20th	ENO1		40-60th	vs	80-100th	0.00698279
1	8878712	-	428.763	-0.17012	0.968068	60-80th	ENO1		60-80th	vs	80-100th	0.00104164
1	8878716	-	103.627	-0.587219	0.976319	60-80th	ENO1
1	8878720	-	163.056	-0.177839	0.983004	80-100th	ENO1
1	9823960	-	168.899	0.0287411	0.977273	60-80th	CLSTN1
1	9823965	-	321.949	-0.0880614	0.980439	80-100th	CLSTN1
1	9943359	-	115.107	0.165769	0.949561	40-60th	LZIC
1	10399034	+	144.567	0.0444635	0.932796	20-40th	PGD
1	10399043	+	108.101	-0.47341	0.578571	0-20th	PGD
1	10399069	+	6585.08	0.0626381	0.965201	60-80th	PGD
1	11012654	+	499.043	-0.0752247	0.952843	40-60th	TARDBP
1	11736136	+	105.978	-0.102312	0.980707	80-100th	AGTRAP
1	17054029	-	410.489	-0.186127	0.944726	40-60th	SDHB
1	17439671	-	230.901	-0.0448087	0.913581	20-40th	RCC2
1	18956631	-	108.349	-0.759989	0.877544	0-20th	IFFO2
1	19251795	+	215.384	0.364786	0.98227	80-100th	MRTO4
1	19251805	+	475.05	0.149436	0.980717	80-100th	MRTO4
1	19251820	+	228.35	0.13548	0.953323	40-60th	MRTO4
1	20661450	-	101.478	-0.518168	0.989247	80-100th	DDOST
1	20786666	-	123.253	-0.0755927	0.968965	60-80th	HP1BP3
1	22052671	+	197.328	-0.128551	0.973384	60-80th	CDC42
1	22052692	+	111.007	0.0613439	0.989247	80-100th	CDC42
1	22052711	+	508.688	-0.0849712	0.948544	40-60th	CDC42
1	22052720	+	151.652	0.222431	0.956019	40-60th	CDC42
1	23559529	-	631.828	0.0719414	0.801128	0-20th	ID3
1	23691794	+	110.349	0.336002	0.925	20-40th	RPL11
1	23743471	+	124.76	0.188675	0.93765	20-40th	ELOA
1	23778418	+	137.419	0.455834	0.946168	40-60th	PITHD1
1	23980354	-	176.247	-0.220808	0.985294	80-100th	SRSF10
1	24643302	+	157.565	-0.234458	1	80-100th	SRRM1
1	24745447	+	375.107	-0.372054	0.957944	40-60th	CLIC4
1	25247454	-	384.222	-0.195577	0.904113	20-40th	RSRP1
1	25338334	+	197.833	-0.169427	0.97601	60-80th	TMEM50A
1	25906419	-	940.657	-0.831198	0.982704	80-100th	STMN1
1	26169927	+	588.559	0.172743	0.958385	40-60th	ZNF593
1	26169929	+	104.075	0.192342	0.932773	20-40th	ZNF593
1	26280099	+	191.808	-0.259416	0.96886	60-80th	SH3BGRL3
1	26863149	+	1705.57	-0.328064	0.89824	0-20th	SFN
1	26863151	+	551.162	-0.20148	0.946809	40-60th	SFN
1	26890274	-	150.205	-0.227166	0.937753	20-40th	GPN2
1	26921760	+	101.581	0.282355	0.962419	40-60th	NUDC
1	27914575	-	100.489	0.287545	0.926606	20-40th	RPA2
1	28236121	+	399.767	0.0316521	0.982576	80-100th	ATP5IF1
1	28236124	+	566.584	-0.649223	0.994833	80-100th	ATP5IF1
1	28236131	+	134.185	0.416263	0.977035	60-80th	ATP5IF1
1	28236154	+	519.09	-0.320612	0.988373	80-100th	ATP5IF1
1	28518255	+	148.308	0.201942	0.979123	80-100th	RCC1
1	28736940	+	156.551	-0.41581	0.930435	20-40th	YTHDF2
1	31296764	-	104.41	-0.538397	0.976077	60-80th	SNRNP40
1	31296782	-	135.409	-0.00792343	0.96648	60-80th	SNRNP40
1	31644873	-	191.405	-0.436156	0.982499	80-100th	PEF1
1	32108056	+	116.571	-0.328215	0.961438	40-60th	KPNA6
1	32222392	+	126.583	-0.401637	0.968085	60-80th	EIF3I
1	32222407	+	4566.27	0.101104	0.98976	80-100th	EIF3I
1	32222411	+	678.048	0.312154	0.944687	40-60th	EIF3I
1	32222433	+	379.325	-0.0358675	0.953943	40-60th	EIF3I
1	32817349	-	151.092	0.652453	0.979452	80-100th	YARS1
1	32817358	-	215.647	0.078851	0.973112	60-80th	YARS1
1	32817414	-	167.032	0.34164	0.921569	20-40th	YARS1
1	33036879	-	137.019	0.0817892	0.938462	20-40th	AK2
1	33036883	-	127.461	0.0598734	0.977172	60-80th	AK2
1	35641526	-	645.219	0.174217	0.944258	40-60th	PSMB2
1	35641538	-	432.883	-0.0302327	0.90642	20-40th	PSMB2
1	36149486	-	175.985	0.30416	0.97467	60-80th	TRAPPC3
1	36397906	-	123.793	-0.00185401	0.984674	80-100th	LSM10
1	37595935	-	329.5	-0.348054	0.953293	40-60th	GNL2
1	37807790	+	117.888	0.0977534	0.966102	60-80th	C1orf122
1	37808208	-	118.925	-0.175664	0.936842	20-40th	YRDC
1	37990022	-	154.11	0.150278	0.94409	40-60th	SF3A3
1	38012734	+	112.391	0.239375	0.940782	20-40th	UTP11
1	38873348	-	415.029	0.408477	0.981132	80-100th	MYCBP
1	38991288	+	107.21	0.108912	0.921659	20-40th	AKIRIN1
1	39026318	+	193.356	-0.218179	0.991538	80-100th	NDUFS5
1	39026325	+	672.985	0.389779	0.98495	80-100th	NDUFS5
1	39026330	+	119.379	-0.188361	0.993243	80-100th	NDUFS5
1	39026346	+	158.359	-0.0612497	0.993311	80-100th	NDUFS5
1	39026350	+	878.005	-0.128761	0.979963	80-100th	NDUFS5
1	39026371	+	143.888	-0.435184	0.962228	40-60th	NDUFS5
1	39883504	-	274.696	-0.0447392	0.976331	60-80th	TRIT1
1	40097245	-	361.523	0.268528	0.986689	80-100th	PPT1
1	40097247	-	639.162	-0.202154	0.962541	40-60th	PPT1
1	40097254	-	146.072	-0.569002	0.962743	40-60th	PPT1
1	40979755	+	227.3	-0.241191	0.905145	20-40th	CTPS1
1	42335232	-	138.655	0.0301801	0.931373	20-40th	FOXJ3
1	42658424	+	275.989	-0.326974	0.982398	80-100th	PPIH
1	42682418	+	339.192	0.234229	0.965986	60-80th	YBX1
1	42958868	-	957.468	-0.539973	0.938559	20-40th	SLC2A1
1	43358953	+	109.737	0.530951	0.953069	40-60th	CDC20
1	43358976	+	203.476	0.141745	0.993865	80-100th	CDC20
1	43358989	+	108.764	-0.365133	0.938272	20-40th	CDC20
1	43368011	-	106.452	-0.0471403	0.988439	80-100th	ELOVL1
1	43974960	+	938.277	-0.249602	0.983815	80-100th	ATP6V0B
1	44739837	+	185.397	-0.328388	0.967955	60-80th	KIF2C
1	44739862	+	123.938	-0.411409	0.953767	40-60th	KIF2C
1	44775545	+	389.541	0.155133	0.982461	80-100th	RPS8
1	44775547	+	209.568	0.0713517	0.908795	20-40th	RPS8
1	44775561	+	161.216	-0.242035	0.980697	80-100th	RPS8
1	44775582	+	521.923	-0.122419	0.96789	60-80th	RPS8
1	44775586	+	123.614	-0.137066	0.984848	80-100th	RPS8
1	45551065	+	133.213	-0.45684	0.994376	80-100th	AKR1A1
1	45584045	+	1079.03	-0.0018417	0.966604	60-80th	NASP
1	45688181	+	101.024	-0.222932	0.926564	20-40th	TMEM69
1	46303651	+	213.17	0.424605	0.873668	0-20th	UQCRH
1	46303661	+	147.597	0.45083	0.981824	80-100th	UQCRH
1	46303691	+	2534.16	0.145157	0.977763	60-80th	UQCRH
1	46303693	+	227.335	-0.105675	0.929524	20-40th	UQCRH
1	46303720	+	260.902	-0.275428	1	80-100th	UQCRH
1	47333914	+	171.285	-0.0281285	0.981707	80-100th	CMPK1
1	52404602	+	334.597	0.0303597	0.948221	40-60th	PRPF38A
1	53238543	-	149.446	0.0608484	0.97541	60-80th	MAGOH
1	53838282	-	118.277	-0.0909364	0.972222	60-80th	NDC1
1	54887195	-	117.78	-0.137418	0.975248	60-80th	DHCR24
1	58784043	-	369.544	-0.247109	0.835615	0-20th	JUN
1	62437050	+	106.316	0.0661813	0.966019	60-80th	USP1
1	64966497	-	277.596	-0.513841	0.927273	20-40th	JAK1
1	64966501	-	174.328	-1.27721	0.954545	40-60th	JAK1
1	64966514	-	116.353	-0.6707	0.960784	40-60th	JAK1
1	65992735	+	183.934	0.676214	0.836302	0-20th	PDE4B
1	67430386	-	761.771	-0.264444	0.987578	80-100th	SERBP1
1	68497106	-	117.313	-0.265564	0.969231	60-80th	DEPDC1
1	77219406	-	276.028	0.39413	0.973621	60-80th	PIGK
1	77219430	-	132.938	-0.633819	0.986264	80-100th	PIGK
1	77979077	-	204.161	-0.201458	0.94198	20-40th	FUBP1
1	78004939	+	144.733	0.248581	0.869212	0-20th	DNAJB4
1	78004942	+	125.638	0.413129	0.871575	0-20th	DNAJB4
1	84506578	-	133.119	0.322963	0.964286	60-80th	GNG5
1	85708415	-	114.906	0.0978627	0.948671	40-60th	ZNHIT6
1	86914126	-	156.868	0.212838	0.990883	80-100th	SELENOF
1	88891564	-	313.759	0.0906379	0.955548	40-60th	GTF2B
1	89995110	+	131.857	-0.0218777	0.961538	40-60th	ZNF326
1	92832011	+	111.946	-0.194962	0.952381	40-60th	RPL5
1	92832013	+	118.767	-0.145351	0.941935	20-40th	RPL5
1	92832049	+	250.135	-0.24269	0.895062	0-20th	RPL5
1	92832073	+	445.341	-0.247825	0.978611	60-80th	RPL5
1	93345909	+	131.966	-0.411965	0.877551	0-20th	DR1
1	93909399	-	165.922	-0.00902836	0.919118	20-40th	GCLM
1	93909430	-	421.697	0.246927	0.912945	20-40th	GCLM
1	93909456	-	134.165	-0.0114451	0.886225	0-20th	GCLM
1	100266216	+	155.496	0.13292	0.969298	60-80th	RTCA
1	109076003	-	123.652	0.335136	0.963524	60-80th	TAF13
1	109213907	+	107.144	0.544702	0.963636	60-80th	SARS1
1	109213920	+	137.914	0.00831056	0.969666	60-80th	SARS1
1	109213932	+	246.09	0.207765	0.933244	20-40th	SARS1
1	109426437	-	443.56	0.0372703	0.95674	40-60th	PSMA5
1	109426448	-	256.73	0.288891	0.962102	40-60th	PSMA5
1	109548635	+	168.848	-0.469528	0.993358	80-100th	GNAI3
1	109740316	-	103.071	-0.955858	0.988345	80-100th	GSTM3
1	109984786	+	206.347	-0.629136	0.953846	40-60th	AHCYL1
1	110391002	-	108.23	1.26207	0.827027	0-20th	SLC16A4
1	110391004	-	471.037	0.836755	0.941812	20-40th	SLC16A4
1	110391031	-	126.484	0.20315	0.967877	60-80th	SLC16A4
1	110391047	-	254.731	0.160061	0.958333	40-60th	SLC16A4
1	110407694	-	176.376	0.11977	0.966647	60-80th	LAMTOR5
1	110963920	-	302.295	-0.0680976	0.987952	80-100th	LRIF1
1	111449451	+	225.6	0.133561	0.970508	60-80th	ATP5PB
1	111449458	+	139.688	-0.109367	0.947674	40-60th	ATP5PB
1	111449465	+	875.453	-0.382467	0.990234	80-100th	ATP5PB
1	111449494	+	340.195	-0.0884477	0.985169	80-100th	ATP5PB
1	112619818	+	260.26	0.0663479	0.956204	40-60th	CAPZA1
1	112619832	+	1707.92	-0.0165719	0.987188	80-100th	CAPZA1
1	112619834	+	150.197	-0.218017	0.990632	80-100th	CAPZA1
1	112619835	+	178.884	-0.0163119	0.879121	0-20th	CAPZA1
1	112619837	+	139.405	0.386604	0.893805	0-20th	CAPZA1
1	112707100	-	168.29	-0.0207725	0.989796	80-100th	RHOC
1	112707127	-	1886.85	-0.288265	0.98559	80-100th	RHOC
1	112956195	-	434.192	0.24061	0.942556	20-40th	SLC16A1
1	114581613	-	103.898	-0.397676	0.979177	80-100th	BCAS2
1	114757977	-	161.364	0.0554512	0.977273	60-80th	CSDE1
1	114757981	-	245.192	0.101484	0.960146	40-60th	CSDE1
1	114757987	-	244.882	0.0607373	0.972901	60-80th	CSDE1
1	117929754	+	206.254	-0.0310281	0.948284	40-60th	WDR3
1	119711936	+	205.099	0.227383	0.965477	60-80th	PHGDH
1	120176520	-	355.188	0.0890339	0.964912	60-80th	SEC22B
1	145927453	-	211.992	0.181059	0.958333	40-60th	RBM8A
1	149812370	-	6026.35	-0.0160025	0.772454	0-20th	H2BC18
1	149832657	+	130.018	0.212065	0.887314	0-20th	H4C14
1	149886682	-	13538.6	0.0187015	0.847026	0-20th	H2BC21
1	149886918	+	6363.33	-0.047547	0.841075	0-20th	H2AC20
1	149886919	+	1352.2	-0.470127	0.920176	20-40th	H2AC20
1	149886924	+	244.239	-0.0863644	0.785305	0-20th	H2AC20
1	149887961	-	509.112	0.027382	0.826087	0-20th	H2AC21
1	149887963	-	7738.67	-0.209159	0.843306	0-20th	H2AC21
1	149927781	-	126.812	-0.0602781	0.850267	0-20th	SF3B4
1	149927800	-	112.391	-0.121767	0.922535	20-40th	SF3B4
1	149927803	-	533.643	-0.0863288	0.993671	80-100th	SF3B4
1	150236112	-	336.368	0.165536	0.928318	20-40th	ANP32E
1	150268979	-	128.118	-0.0750351	0.929661	20-40th	APH1A
1	150293842	+	134.797	0.18904	0.974376	60-80th	MRPS21
1	150293885	+	135.312	-0.298474	0.951038	40-60th	MRPS21
1	150579610	-	1259.41	-0.0704422	0.937525	20-40th	MCL1
1	150629577	-	143.574	-0.0460515	0.989829	80-100th	ENSA
1	150629596	-	105.563	0.103079	0.956188	40-60th	ENSA
1	150629612	-	127.114	0.107814	0.873418	0-20th	ENSA
1	151059573	-	132.725	0.0237232	0.975	60-80th	CDC42SE1
1	151190197	-	130.229	0.382096	0.959422	40-60th	VPS72
1	151399564	+	1425.43	-0.111006	0.982824	80-100th	PSMB4
1	151459179	-	118.663	-0.336099	0.941558	20-40th	POGZ
1	151763496	-	311.325	-0.0184572	0.976318	60-80th	MRPL9
1	151993828	-	297.393	0.0855391	0.886899	0-20th	S100A10
1	151993835	-	115	0.369	0.5	0-20th	S100A10
1	151993839	-	556.47	0.916844	0.266963	0-20th	S100A10
1	151993842	-	175.687	-0.361001	0.927461	20-40th	S100A10
1	151993846	-	101.365	0.115821	0.926471	20-40th	S100A10
1	151993859	-	555.027	-0.0224039	0.954545	40-60th	S100A10
1	152036961	-	103.65	-0.698402	0.925234	20-40th	S100A11
1	152036970	-	298.436	-0.533863	0.955567	40-60th	S100A11
1	152036972	-	1498.24	-0.110441	0.951128	40-60th	S100A11
1	152037003	-	383.125	-0.335862	0.5	0-20th	S100A11
1	152037016	-	1112.47	-0.347981	0.947368	40-60th	S100A11
1	153535991	-	13072.9	-0.388278	0.98299	80-100th	S100A6
1	153536012	-	3132.07	-0.452388	0.968939	60-80th	S100A6
1	153536018	-	362.238	-0.521089	0.880779	0-20th	S100A6
1	153536020	-	493.352	-0.605277	0.974356	60-80th	S100A6
1	153536026	-	144.374	-0.273161	0.941667	20-40th	S100A6
1	153545806	-	8014.82	-0.02335	0.97969	80-100th	S100A4
1	153549258	-	185.082	-0.964434	0.945969	40-60th	S100A3
1	153613137	-	130.412	0.679439	0.649682	0-20th	S100A16
1	153627505	-	1798.96	0.786847	0.989419	80-100th	S100A13
1	153634075	+	108.501	-0.00945523	0.87394	0-20th	CHTOP
1	153670972	-	133.93	-0.0761585	0.898085	0-20th	ILF2
1	153670987	-	255.737	0.0731643	0.976645	60-80th	ILF2
1	153728073	+	109.677	-0.559819	0.988571	80-100th	INTS3
1	153963537	-	125.266	-0.365723	0.972976	60-80th	SLC39A1
1	153963549	-	142.387	-0.464044	0.967362	60-80th	SLC39A1
1	153963550	-	146.047	-0.239996	0.957793	40-60th	SLC39A1
1	153977658	-	572.044	0.146346	0.884615	0-20th	JTB
1	153977674	-	155.991	0.436955	0.99	80-100th	JTB
1	154220621	-	167.704	0.0857892	0.947712	40-60th	C1orf43
1	154220637	-	256.03	-0.285992	0.9401	20-40th	C1orf43
1	154272641	+	156.589	0.142305	0.972307	60-80th	HAX1
1	154970745	-	100.825	-0.240292	0.966387	60-80th	SHC1
1	154970747	-	422.397	-0.224481	0.814815	0-20th	SHC1
1	155173238	-	201.401	-0.469049	0.912	20-40th	KRTCAP2
1	155173275	-	125.411	0.0401237	0.983201	80-100th	KRTCAP2
1	155173302	-	403.706	-0.156556	0.979362	80-100th	KRTCAP2
1	155173314	-	212.218	0.287087	0.912821	20-40th	KRTCAP2
1	155241243	-	174.667	-0.0706363	0.953625	40-60th	GBA1
1	155262360	-	266.765	-0.116065	0.957886	40-60th	SCAMP3
1	155308840	+	334.702	0.0628008	0.939297	20-40th	FDPS
1	155308852	+	298.654	-0.178295	0.943089	40-60th	FDPS
1	155308873	+	138.177	-0.331487	0.924242	20-40th	FDPS
1	155308914	+	168.869	-0.309436	1	80-100th	FDPS
1	155308947	+	111.162	-0.411628	0.979487	80-100th	FDPS
1	155308948	+	131.633	-0.213266	0.981481	80-100th	FDPS
1	155324519	+	140.786	0.0343336	0.844444	0-20th	RUSC1
1	156020909	-	122.711	0.0311904	0.937001	20-40th	SSR2
1	156212993	+	119.295	0.111125	0.98543	80-100th	PMF1
1	156213007	+	920.803	-0.0136678	0.979442	80-100th	PMF1
1	156282807	-	100.083	0.639286	0.924812	20-40th	SMG5
1	156338207	-	139.869	-0.17634	0.945055	40-60th	CCT3
1	156338239	-	848.559	0.0225917	0.987197	80-100th	CCT3
1	156338290	-	393.536	0.181988	0.907659	20-40th	CCT3
1	156705583	-	120.903	-0.928626	0.983471	80-100th	CRABP2
1	156741088	-	427.564	-0.435537	0.948845	40-60th	MRPL24
1	156751674	-	679.818	0.3142	0.86	0-20th	HDGF
1	156751685	-	300.035	0.192382	0.927325	20-40th	HDGF
1	156767539	+	103.383	0.29399	0.924216	20-40th	PRCC
1	159780962	+	191.225	-0.157998	0.989899	80-100th	DUSP23
1	159925478	-	1300.77	-0.710359	0.959242	40-60th	TAGLN2
1	159925482	-	106.622	-0.968007	0.947674	40-60th	TAGLN2
1	159925495	-	122.048	-0.712269	0.923077	20-40th	TAGLN2
1	159925501	-	233.63	-0.76526	0.925	20-40th	TAGLN2
1	159925507	-	6436.46	-0.663262	0.954572	40-60th	TAGLN2
1	159925510	-	428.836	-0.544888	0.968522	60-80th	TAGLN2
1	159925543	-	128.653	-0.406944	0.948276	40-60th	TAGLN2
1	160285130	-	131.821	0.544883	0.986702	80-100th	ENSG00000258465
1	161118037	-	160.621	-0.10509	0.992	80-100th	PFDN2
1	161118105	+	101.655	0.47977	0.943463	40-60th	NIT1
1	161153995	+	124.604	0.347423	0.943647	40-60th	UFC1
1	161202367	+	352.971	-0.238436	0.984423	80-100th	NDUFS2
1	161226060	+	111.036	0.124796	0.984848	80-100th	TOMM40L
1	161314381	+	3174.52	-0.116592	0.980626	80-100th	SDHC
1	161314391	+	456.099	0.187922	0.983299	80-100th	SDHC
1	161314399	+	161.736	-0.200841	0.970588	60-80th	SDHC
1	164559184	+	156.267	1.03585	0.975709	60-80th	PBX1
1	165631209	+	557.928	-0.322106	0.984848	80-100th	MGST3
1	165631224	+	353.404	-0.232363	0.924242	20-40th	MGST3
1	165631239	+	191.35	-0.172454	0.972833	60-80th	MGST3
1	165631243	+	443.554	0.063808	0.958647	40-60th	MGST3
1	165631245	+	187.539	0.205693	0.966576	60-80th	MGST3
1	165631273	+	119.049	-0.441777	0.987295	80-100th	MGST3
1	165698562	-	138.962	0.432671	0.971415	60-80th	ALDH9A1
1	165768868	-	324.51	0.0444917	0.982002	80-100th	TMCO1
1	165827584	+	127.844	0.0125942	0.990291	80-100th	UCK2
1	165827616	+	167.89	0.0117291	0.962791	40-60th	UCK2
1	167553762	-	363.476	-0.855034	0.968892	60-80th	CREG1
1	167935995	-	201.371	-0.277267	0.944444	40-60th	MPC2
1	168178962	+	150.341	-0.409786	0.935065	20-40th	TIPRL
1	169106323	+	1802.28	-0.211773	0.913526	20-40th	ATP1B1
1	169106324	+	167.32	-0.290908	0.909976	20-40th	ATP1B1
1	169106690	+	422.823	-0.353624	0.957102	40-60th	ATP1B1
1	173477310	+	228.422	0.377262	0.986547	80-100th	PRDX6
1	173477330	+	107.061	0.125418	0.988889	80-100th	PRDX6
1	173477346	+	202.788	0.206679	0.988855	80-100th	PRDX6
1	173477386	+	573.919	0.00570119	0.982953	80-100th	PRDX6
1	175023418	-	116.011	-0.0689209	0.982923	80-100th	MRPS14
1	175023425	-	256.939	-0.288522	0.976305	60-80th	MRPS14
1	179877803	-	387.953	0.0684703	0.957544	40-60th	TOR1AIP2
1	179882297	+	107.574	0.295282	0.941176	20-40th	TOR1AIP1
1	180154869	+	264.232	-0.104448	0.949153	40-60th	QSOX1
1	182839350	+	695.626	0.041212	0.96831	60-80th	DHX9
1	185317243	-	410.059	-1.31647	0.937223	20-40th	IVNS1ABP
1	186375254	-	208.339	0.288396	0.946507	40-60th	TPR
1	186680423	-	318.279	2.4114	0.855424	0-20th	PTGS2
1	186828949	+	101.953	1.22922	0.971831	60-80th	PLA2G4A
1	192809041	+	112.279	1.4195	0.932402	20-40th	RGS2
1	193105414	-	142.737	-0.174069	0.982513	80-100th	GLRX2
1	197146669	-	186.727	-0.380336	0.984744	80-100th	ASPM
1	200410058	-	122.556	-0.356378	0.905358	20-40th	ZNF281
1	201469188	-	123.755	-0.221833	0.928	20-40th	PHLDA3
1	201507116	-	207.255	-0.568403	0.932039	20-40th	CSRP1
1	201507123	-	2495.37	-0.613535	0.979838	80-100th	CSRP1
1	201955503	+	371.96	-0.260725	0.992954	80-100th	TIMM17A
1	201955506	+	392.515	0.195301	0.968098	60-80th	TIMM17A
1	202010625	+	1502.71	0.167729	0.912369	20-40th	ELF3
1	202958312	-	152.692	0.227986	0.983957	80-100th	ADIPOR1
1	203305519	+	132.95	0.81782	0.895833	0-20th	BTG2
1	203861581	+	104.273	-0.273553	0.993464	80-100th	SNRPE
1	203861603	+	1311.68	0.175309	0.974741	60-80th	SNRPE
1	203861610	+	199.571	-0.147147	0.92353	20-40th	SNRPE
1	203861627	+	264.598	-0.629181	0.986514	80-100th	SNRPE
1	204411817	-	348.681	0.21982	0.948119	40-60th	PPP1R15B
1	205121975	-	130.766	0.146415	0.96732	60-80th	RBBP5
1	205750182	-	313.607	0.024042	0.980392	80-100th	NUCKS1
1	207321684	+	108.785	0.10376	0.971429	60-80th	CD55
1	207752066	+	160.939	0.127263	0.985755	80-100th	CD46
1	207752083	+	103.985	0.144739	0.989209	80-100th	CD46
1	207752086	+	249.498	0.632352	0.92449	20-40th	CD46
1	211675621	-	119.613	0.249439	0.99631	80-100th	NEK2
1	212791777	-	464.723	-0.273511	0.965787	60-80th	NSL1
1	212791779	-	192.675	-0.222068	0.959131	40-60th	NSL1
1	212791793	-	147.013	-0.106108	0.99187	80-100th	NSL1
1	214603214	+	135.605	-0.307839	0.971014	60-80th	CENPF
1	218285293	+	213.91	-0.349029	0.974038	60-80th	RRP15
1	219173869	+	102.587	0.402838	0.954707	40-60th	LYPLAL1
1	219173878	+	119.405	-0.128162	0.954504	40-60th	LYPLAL1
1	220046477	-	237.698	0.24814	0.983537	80-100th	EPRS1
1	220094132	+	337.93	-0.24278	0.968254	60-80th	IARS2
1	222712564	+	178.238	-0.257125	0.872093	0-20th	BROX
1	223712539	+	265.225	-0.0865436	0.764045	0-20th	CAPN2
1	224356879	+	149.056	-0.477738	1	80-100th	CNIH4
1	225924169	-	122.072	0.0259439	1	80-100th	PYCR2
1	225924278	-	137.989	0.109267	0.942857	40-60th	ENSG00000255835
1	226062721	+	457.097	-0.0519573	0.96782	60-80th	H3-3A
1	226408090	-	230.381	0.279758	0.968664	60-80th	PARP1
1	226870620	+	123.204	-0.16314	0.90411	20-40th	PSEN2
1	227735435	+	105.98	0.188404	0.975248	60-80th	SNAP47
1	228082708	+	882.618	-0.0225646	0.972475	60-80th	ARF1
1	228082717	+	400.882	-0.412053	0.978831	60-80th	ARF1
1	228082730	+	224.479	-0.0482863	0.838655	0-20th	ARF1
1	228109299	-	675.717	0.0219323	0.973141	60-80th	MRPL55
1	230067238	+	381.42	-0.598527	0.97541	60-80th	GALNT2
1	231337852	-	117.439	-0.025693	0.965654	60-80th	EXOC8
1	231422285	-	102.443	0.851074	0.876923	0-20th	EGLN1
1	231528665	+	129.967	-0.275376	0.977961	60-80th	TSNAX
1	231528675	+	176.061	-0.0828215	0.941551	20-40th	TSNAX
1	234373486	+	267.683	0.266834	0.920213	20-40th	COA6
1	235128871	-	109.375	-0.329304	0.937547	20-40th	TOMM20
1	235328570	+	229.01	0.0354294	0.961551	40-60th	ENSG00000285053
1	235367430	+	107.705	-0.715846	0.995294	80-100th	TBCE
1	241519711	-	144.205	-0.334507	0.969089	60-80th	FH
1	241519722	-	154.813	-0.0688027	0.948919	40-60th	FH
1	241519725	-	143.324	-0.591562	0.983759	80-100th	FH
1	241519749	-	105.044	0.16602	0.990547	80-100th	FH
1	241848204	+	132.973	-0.112282	0.98057	80-100th	EXO1
1	244864482	-	100.662	-0.513588	0.743802	0-20th	HNRNPU
1	244864491	-	252.741	-0.24354	0.971787	60-80th	HNRNPU
1	244864517	-	531.933	-0.222682	0.92719	20-40th	HNRNPU
1	244864539	-	1126.61	0.132796	0.958528	40-60th	HNRNPU
1	244864542	-	3070.65	-0.0891056	0.964118	60-80th	HNRNPU
1	244864544	-	1191.72	0.0396794	0.939004	20-40th	HNRNPU
1	244864570	-	109.902	0.00838576	0.989247	80-100th	HNRNPU
1	246566254	-	120.246	0.352983	0.932487	20-40th	TFB2M
1	246566261	-	339.024	0.220636	0.958712	40-60th	TFB2M
2	264900	+	1108.51	-0.144553	0.97449	60-80th	ACP1
2	3558360	-	152.429	-0.43811	0.964286	60-80th	RNASEH1
2	3575315	+	302.627	-0.058011	0.973153	60-80th	RPS7
2	3575333	+	227.114	0.120107	0.781818	0-20th	RPS7
2	8682056	+	9994.58	0.417424	0.898323	0-20th	ID2
2	9206812	+	152.96	-0.451798	0.94702	40-60th	ASAP2
2	9423456	-	157.026	-0.688779	0.980583	80-100th	ITGB1BP1
2	9423657	+	124.066	0.2306	0.962662	40-60th	CPSF3
2	9630969	-	4313.4	-0.258486	0.963699	60-80th	YWHAQ
2	9630980	-	225.771	-0.00516687	0.955003	40-60th	YWHAQ
2	9630985	-	163.251	-0.342315	0.96757	60-80th	YWHAQ
2	9630991	-	424.378	-0.0364721	0.946167	40-60th	YWHAQ
2	9630997	-	1277.19	-0.0386076	0.989609	80-100th	YWHAQ
2	9631001	-	277.564	-0.109285	0.965974	60-80th	YWHAQ
2	9631010	-	100.012	0.234411	0.940594	20-40th	YWHAQ
2	10122712	+	106.752	0.150638	0.946429	40-60th	RRM2
2	10689975	-	578.064	-0.0222635	0.979971	80-100th	NOL10
2	10812754	-	126.391	-0.43345	0.836538	0-20th	PDIA6
2	11155477	+	129.074	-0.823586	1	80-100th	SLC66A3
2	15591868	+	303.439	-0.115348	0.971429	60-80th	DDX1
2	20225094	-	160.575	-0.418016	0.945736	40-60th	SDC1
2	20225130	-	415.588	-0.430161	0.945599	40-60th	SDC1
2	20447074	+	1763.02	-0.614364	0.911341	20-40th	RHOB
2	20823101	-	221.173	0.280882	0.94	20-40th	LDAH
2	24076347	-	243.874	-0.376311	0.982	80-100th	SF3B6
2	24076350	-	211.855	0.247958	0.97975	80-100th	SF3B6
2	24084772	-	259.913	-1.36352	0.979866	80-100th	TP53I3
2	24084775	-	297.429	-0.832075	0.98	80-100th	TP53I3
2	24084778	-	353.64	-0.446235	0.994681	80-100th	TP53I3
2	24084828	-	242.485	-0.258695	0.977273	60-80th	TP53I3
2	24084834	-	235.009	-0.526944	0.987302	80-100th	TP53I3
2	26034089	+	144.223	-0.00831643	0.938931	20-40th	RAB10
2	26034118	+	120.149	-0.0773572	0.854356	0-20th	RAB10
2	26244604	-	140.706	0.170181	0.982865	80-100th	HADHA
2	26244619	-	271.103	-0.00819146	0.98233	80-100th	HADHA
2	26244632	-	552.835	0.027082	0.971313	60-80th	HADHA
2	26244928	+	191.852	-0.125499	0.99435	80-100th	HADHB
2	26244939	+	538.164	0.184335	0.983672	80-100th	HADHB
2	26346146	+	294.619	-0.141519	0.99057	80-100th	SELENOI
2	26764321	+	121.354	0.105031	0.976744	60-80th	SLC35F6
2	26786067	+	185.911	-0.440696	0.954327	40-60th	CENPA
2	26970637	+	159.946	0.206849	0.972346	60-80th	MAPRE3
2	27071649	-	513.022	-0.255944	0.985469	80-100th	OST4
2	27071658	-	649.094	-0.112291	0.988904	80-100th	OST4
2	27071669	-	624.218	-0.160017	0.979226	80-100th	OST4
2	27071670	-	188.518	0.148509	0.973568	60-80th	OST4
2	27071673	-	190.01	0.0393566	0.985967	80-100th	OST4
2	27134636	-	129.148	-0.27863	0.958363	40-60th	PREB
2	27212361	+	763.156	-0.0534398	0.9858	80-100th	ATRAID
2	27323097	-	155.791	0.0663172	1	80-100th	MPV17
2	27356764	-	183.898	-0.21317	0.991543	80-100th	GTF3C2
2	27370615	+	176.38	-0.00496296	0.963583	60-80th	SNX17
2	27370617	+	387.284	0.19244	0.988677	80-100th	SNX17
2	27370627	+	130.901	-0.158405	0.952	40-60th	SNX17
2	27409591	-	152.642	0.0101947	0.969017	60-80th	PPM1G
2	27428626	+	302.887	-0.323437	0.96431	60-80th	NRBP1
2	27663609	-	170.725	-0.460283	0.978521	60-80th	SUPT7L
2	27771765	+	227.728	-0.203451	0.934256	20-40th	MRPL33
2	28870309	-	157.201	-0.227803	0.951031	40-60th	TRMT61B
2	28894690	+	294.581	-0.146593	0.969741	60-80th	WDR43
2	30147007	+	133.679	-0.0196235	0.958763	40-60th	YPEL5
2	30447221	+	128.935	-0.553698	0.953846	40-60th	LCLAT1
2	30447246	+	143.293	-0.0882873	0.962761	40-60th	LCLAT1
2	30447276	+	103.562	-0.345306	0.934783	20-40th	LCLAT1
2	32039805	-	368.73	-0.238162	0.963194	60-80th	DPY30
2	32039809	-	126.513	0.16439	0.975763	60-80th	DPY30
2	32039816	-	118.382	0.261388	0.9625	40-60th	DPY30
2	32165864	+	466.111	-0.344849	0.987951	80-100th	SLC30A6
2	32165882	+	115.315	-0.330232	0.982712	80-100th	SLC30A6
2	32628096	+	103.248	-0.498586	0.976306	60-80th	TTC27
2	36355778	+	591.511	-0.347882	0.947368	40-60th	CRIM1
2	36355781	+	205.976	-0.0393744	0.910714	20-40th	CRIM1
2	37196498	+	281.224	-0.068529	0.982759	80-100th	CEBPZOS
2	37231589	-	218.311	-0.00447438	0.968321	60-80th	CEBPZ
2	38751359	-	1395.29	-0.056661	0.952873	40-60th	SRSF7
2	38778221	+	100.101	0.686525	0.957585	40-60th	GEMIN6
2	38875996	+	123.311	-0.224896	0.987654	80-100th	MORN2
2	43996005	-	389.913	-0.193828	0.980762	80-100th	LRPPRC
2	44168877	+	121.107	-0.421525	0.774775	0-20th	PPM1B
2	44361492	-	115.766	-0.263112	0.975125	60-80th	PREPL
2	46297407	+	2093.6	-1.41039	0.952381	40-60th	EPAS1
2	46542702	+	108.589	-0.735002	0.986607	80-100th	RHOQ
2	46617204	+	105.207	0.0789952	0.956334	40-60th	CRIPT
2	46617232	+	113.775	-0.559792	0.972727	60-80th	CRIPT
2	47176511	-	9226.12	-0.411511	0.954144	40-60th	CALM2
2	47176514	-	611.402	-0.525151	0.947966	40-60th	CALM2
2	47176515	-	470.144	-0.133898	0.934925	20-40th	CALM2
2	47783145	+	539.272	-0.287649	0.989459	80-100th	MSH6
2	54456327	+	127.985	-0.479101	0.97804	60-80th	SPTBN1
2	54558383	+	343.98	-0.689924	0.923858	20-40th	SPTBN1
2	55050451	-	1299.17	-0.312667	0.946226	40-60th	RTN4
2	55050497	-	264.577	-0.151369	0.965665	60-80th	RTN4
2	55050499	-	324.719	-0.242083	0.935484	20-40th	RTN4
2	55050507	-	167.036	0.200439	0.935484	20-40th	RTN4
2	55050535	-	117.752	0.0944215	0.952799	40-60th	RTN4
2	55269217	-	119.979	-0.0963596	0.987466	80-100th	MTIF2
2	58241323	-	137.831	-0.546633	0.968142	60-80th	FANCL
2	61145116	+	182.034	-0.673921	0.982891	80-100th	C2orf74
2	61538324	-	214.365	-0.215418	0.953471	40-60th	XPO1
2	61888580	-	100.831	-0.362425	0.944954	40-60th	CCT4
2	61888597	-	276.629	0.0951196	0.959112	40-60th	CCT4
2	61888612	-	475.804	-0.104306	0.892565	0-20th	CCT4
2	61905674	+	194.908	0.26696	0.987227	80-100th	COMMD1
2	63588968	+	309.677	0.418049	0.973992	60-80th	MDH1
2	63588979	+	242.004	0.081102	0.977958	60-80th	MDH1
2	65130106	-	233.75	-0.148583	0.958289	40-60th	RAB1A
2	65130128	-	135.521	0.193622	0.964354	60-80th	RAB1A
2	65227847	+	119.696	0.269983	0.919271	20-40th	ACTR2
2	68063004	-	212.239	0.14362	0.981763	80-100th	C1D
2	68252497	-	250.008	-0.205421	0.941154	20-40th	PPP3R1
2	69013179	+	498.101	-1.38751	0.901993	20-40th	ANTXR1
2	69437435	-	231.783	0.131253	0.960331	40-60th	NFU1
2	69742103	+	115.315	-0.549442	0.979104	80-100th	ANXA4
2	69742105	+	143.314	0.0513476	0.893443	0-20th	ANXA4
2	69893956	+	218.714	-0.0279118	0.955095	40-60th	SNRNP27
2	70087477	+	299.285	0.0399878	0.971098	60-80th	PCBP1
2	70258143	+	162.415	-0.813921	0.990721	80-100th	PCYOX1
2	70293675	-	137.628	-0.930407	0.984513	80-100th	SNRPG
2	70293680	-	358.484	-0.227283	0.932747	20-40th	SNRPG
2	70293709	-	167.875	-0.267531	0.96559	60-80th	SNRPG
2	70293715	-	882.634	-0.103306	0.978146	60-80th	SNRPG
2	70293717	-	838.397	-0.18473	0.946333	40-60th	SNRPG
2	70293728	-	137.319	-0.214328	0.974026	60-80th	SNRPG
2	70293730	-	521.156	0.164524	0.981467	80-100th	SNRPG
2	70293731	-	431.441	-0.0663301	0.979657	80-100th	SNRPG
2	70293737	-	775.681	-0.142512	0.980784	80-100th	SNRPG
2	70302025	-	178.279	0.056014	0.972222	60-80th	FAM136A
2	70768197	-	104.827	-0.0531165	0.947644	40-60th	ADD2
2	71130634	+	203.52	-0.256016	0.972835	60-80th	MPHOSPH10
2	73214245	+	478.175	-0.202464	0.971583	60-80th	SMYD5
2	73234290	+	630.864	0.3356	0.981657	80-100th	CCT7
2	73234308	+	431.359	-0.429433	0.983076	80-100th	CCT7
2	73737332	-	554.001	-0.0697271	0.990851	80-100th	TPRKB
2	74147912	-	156.657	0.183068	0.995829	80-100th	BOLA3
2	74472687	-	580.4	0.216686	0.981935	80-100th	MRPL53
2	74529698	-	259.271	0.231306	0.939452	20-40th	AUP1
2	74958643	+	322.657	-0.0472761	0.986257	80-100th	POLE4
2	74958645	+	111.114	0.25025	0.976744	60-80th	POLE4
2	75646785	+	510.697	0.0141401	0.965083	60-80th	MRPL19
2	75646801	+	110.034	-0.109116	0.968553	60-80th	MRPL19
2	84459261	-	270.305	0.20809	0.979592	80-100th	SUCLG1
2	84459269	-	235.063	0.186613	0.972851	60-80th	SUCLG1
2	84459277	-	414.626	-0.0541099	0.942503	20-40th	SUCLG1
2	85327973	-	203.242	-0.0539666	0.975265	60-80th	TGOLN2
2	85327987	-	131.834	-0.565565	0.910698	20-40th	TGOLN2
2	85327989	-	1072.81	-0.319715	0.985755	80-100th	TGOLN2
2	85414016	-	139.112	0.0614317	0.974619	60-80th	CAPG
2	85561493	-	185.09	0.184808	0.97892	80-100th	GGCX
2	85595722	+	177.571	0.0306887	0.98951	80-100th	RNF181
2	85595748	+	616.055	0.185972	0.982963	80-100th	RNF181
2	85616189	+	131.997	-0.0896233	0.927419	20-40th	USP39
2	86105886	-	148.864	0.294455	0.959235	40-60th	POLR1A
2	86106235	+	201.177	-0.00965671	0.828081	0-20th	PTCD3
2	86195442	-	512.43	0.0726937	1	80-100th	IMMT
2	86199457	+	120.697	0.0106617	0.980769	80-100th	MRPL35
2	86199463	+	455.696	-0.0781753	0.982201	80-100th	MRPL35
2	86563420	-	195.43	0.0398803	0.983871	80-100th	CHMP3
2	96208822	-	205.331	0.20462	0.94451	40-60th	STARD7
2	96305508	-	180.097	-0.815253	0.979657	80-100th	SNRNP200
2	96335801	+	104.413	-0.406322	0.985075	80-100th	NCAPH
2	97646048	+	166.788	-0.438335	0.990346	80-100th	COX5B
2	97646062	+	813.301	0.00581784	0.987323	80-100th	COX5B
2	97646074	+	386.35	-0.544347	0.984295	80-100th	COX5B
2	99181186	+	275.648	-0.0474964	0.949109	40-60th	MRPL30
2	99336321	-	108.274	-0.168412	0.979223	80-100th	TXNDC9
2	99336331	-	136.009	-0.0497195	0.971963	60-80th	TXNDC9
2	99337389	+	196.486	0.380182	0.97276	60-80th	EIF5B
2	101002274	+	1273.15	0.215066	0.965061	60-80th	RPL31
2	101002276	+	759.869	0.182064	0.915727	20-40th	RPL31
2	101002299	+	270.104	0.400423	0.901358	20-40th	RPL31
2	101151382	-	124.89	0.456347	0.927711	20-40th	TBC1D8
2	101308690	-	111.868	-0.737934	0.967921	60-80th	RNF149
2	105038077	+	108.551	0.50084	0.975248	60-80th	MRPS9
2	106886167	-	183.649	-1.52871	0.915254	20-40th	ST6GAL2
2	108534470	+	140.4	0.26459	0.925234	20-40th	LIMS1
2	110212529	-	125.658	-0.0704151	0.979742	80-100th	MTLN
2	110678063	-	165.089	-0.291577	0.972308	60-80th	BUB1
2	111120914	+	143.061	-0.24475	0.94	20-40th	BCL2L11
2	111884186	-	150.484	-0.502513	0.903846	20-40th	ANAPC1
2	112255042	-	155.395	0.0896408	0.975904	60-80th	ZC3H8
2	112645941	+	239.274	-0.410724	0.886654	0-20th	SLC20A1
2	113756620	-	166.791	-0.283384	0.958929	40-60th	SLC35F5
2	113756642	-	154.372	-0.591008	0.961843	40-60th	SLC35F5
2	113890072	+	317.474	-0.207801	0.960714	40-60th	ACTR3
2	113890097	+	161.45	-0.0914052	0.9668	60-80th	ACTR3
2	117814691	+	185.727	-0.135057	0.93648	20-40th	DDX18
2	117814708	+	165.207	0.320247	0.935836	20-40th	DDX18
2	117814712	+	221.908	0.221018	0.967419	60-80th	DDX18
2	119366964	+	129.135	0.382007	0.97619	60-80th	DBI
2	119366966	+	140.706	-0.205094	0.926172	20-40th	DBI
2	119366977	+	2878.49	-0.15813	0.969428	60-80th	DBI
2	119366992	+	499.982	-0.175215	0.980999	80-100th	DBI
2	120223400	-	111.297	-0.974024	0.978142	60-80th	TMEM185B
2	121755662	+	207.118	0.106905	0.951967	40-60th	TSN
2	127294144	-	159.093	-0.667512	0.971213	60-80th	ERCC3
2	127526489	-	120.966	0.00288904	0.965686	60-80th	IWS1
2	128091200	+	131.605	-0.115462	0.995833	80-100th	UGGT1
2	130181595	-	112.545	-0.213758	0.972046	60-80th	SMPD4
2	130182262	+	691.23	-0.317892	0.982478	80-100th	MZT2B
2	130342897	+	276.109	-0.0107541	0.983539	80-100th	IMP4
2	131105305	+	419.801	0.309506	0.974548	60-80th	PLEKHB2
2	131105336	+	673.438	-0.266692	0.984583	80-100th	PLEKHB2
2	135876424	-	131.308	-0.0394128	0.948177	40-60th	MCM6
2	135876441	-	100.315	0.403252	0.95756	40-60th	MCM6
2	135985626	-	185.842	-0.909667	0.986667	80-100th	DARS1
2	142877628	+	199.801	0.0957396	0.897196	0-20th	KYNU
2	142877664	+	3729.91	0.202816	0.914795	20-40th	KYNU
2	142877666	+	264.164	0.197817	0.81749	0-20th	KYNU
2	149587756	-	117.996	0.394548	0.986726	80-100th	MMADHC
2	150487665	-	313.221	-0.554293	0.860805	0-20th	RND3
2	151828501	-	132.862	0.568608	0.971429	60-80th	ARL5A
2	152717409	-	360.467	-0.464611	0.972644	60-80th	PRPF40A
2	152717461	-	116.815	0.167722	0.961538	40-60th	PRPF40A
2	161160428	+	172.415	-0.0686123	0.8875	0-20th	TANK
2	161308425	+	133.122	-0.148942	0.934086	20-40th	PSMD14
2	161308426	+	114.89	-0.14806	0.910596	20-40th	PSMD14
2	166375944	-	105.805	0.105059	0.94	20-40th	SCN9A
2	169798871	+	112.027	0.243209	0.981232	80-100th	SSB
2	169798889	+	124.898	0.172146	0.975541	60-80th	SSB
2	171433990	-	109.403	0.0869684	0.966102	60-80th	METTL8
2	171894244	-	122.658	-0.208613	0.974227	60-80th	SLC25A12
2	171922422	+	112.091	0.308247	0.988372	80-100th	HAT1
2	171922435	+	139.336	0.0715198	0.970772	60-80th	HAT1
2	171922462	+	108.159	-0.0962315	0.971145	60-80th	HAT1
2	171999953	+	110.021	0.220938	0.988095	80-100th	METAP1D
2	172427586	+	109.257	0.809107	0.978022	60-80th	ITGA6
2	173075849	+	128.105	-0.585933	0.911362	20-40th	MAP3K20
2	174248506	-	139.394	-0.00947901	0.997247	80-100th	OLA1
2	174248516	-	271.101	0.15267	0.995025	80-100th	OLA1
2	175181704	-	103.128	-0.00954049	0.795455	0-20th	ATP5MC3
2	175181710	-	706.599	0.01496	0.979003	80-100th	ATP5MC3
2	177392773	+	119.563	-0.452198	0.989398	80-100th	AGPS
2	182716285	+	108.475	-0.231695	0.857143	0-20th	DNAJC10
2	186486253	+	116.927	0.464171	0.929883	20-40th	ZC3H15
2	187554435	-	550.971	0.63078	0.924538	20-40th	TFPI
2	189179805	-	193.454	0.0899611	0.971233	60-80th	COL5A2
2	189441474	+	582.491	-0.0455699	0.948586	40-60th	WDR75
2	189661483	+	139.016	-0.0886021	0.945946	40-60th	ASNSD1
2	190880821	+	1122.08	-0.189419	0.919589	20-40th	GLS
2	191014172	-	158.548	-0.447806	0.979592	80-100th	STAT1
2	191245408	+	166.402	-0.852592	0.973333	60-80th	MYO1B
2	191245427	+	102.004	-0.358887	0.940678	20-40th	MYO1B
2	191678136	+	388.408	-0.186446	0.90237	20-40th	NABP1
2	196171578	-	178.033	0.187847	0.95082	40-60th	STK17B
2	197435028	-	2010.12	-0.0474329	0.973889	60-80th	SF3B1
2	197435045	-	105.408	-0.306177	0.953975	40-60th	SF3B1
2	197499835	-	2807.89	-0.231141	0.975312	60-80th	HSPD1
2	197499847	-	422.302	-0.269436	0.969754	60-80th	HSPD1
2	197499866	-	1463.68	0.102165	0.949805	40-60th	HSPD1
2	197499874	-	167.956	0.497696	0.838235	0-20th	HSPD1
2	197499881	-	219.55	0.32667	0.931034	20-40th	HSPD1
2	197500358	+	633.853	0.559945	0.937709	20-40th	HSPE1
2	197500404	+	477.348	-0.430572	0.994203	80-100th	HSPE1-MOB4
2	197500409	+	105.362	-0.301777	0.95858	40-60th	HSPE1-MOB4
2	197500414	+	119.492	-0.65111	0.87037	0-20th	HSPE1-MOB4
2	197516047	+	153.988	0.175279	0.972332	60-80th	MOB4
2	197516066	+	143.317	-0.708546	0.98	80-100th	MOB4
2	197705369	+	113.2	0.409053	0.963077	60-80th	MARS2
2	199955793	+	149.115	-0.150043	0.960453	40-60th	MAIP1
2	200811888	+	272.134	-0.106531	0.970588	60-80th	BZW1
2	200811910	+	1009.47	-0.315514	0.940331	20-40th	BZW1
2	200811922	+	376.029	0.0763393	0.943844	40-60th	BZW1
2	200864658	-	340.006	0.180123	0.919107	20-40th	CLK1
2	200963660	-	100.136	-0.628778	0.974895	60-80th	ORC2
2	201071995	+	208.218	0.509162	0.994293	80-100th	NDUFB3
2	201072024	+	196.859	-0.467206	0.981272	80-100th	NDUFB3
2	201072031	+	114.469	-0.337736	0.938812	20-40th	NDUFB3
2	201118716	+	100.792	-1.0461	0.929553	20-40th	CFLAR
2	202238569	-	228.308	0.24324	0.907407	20-40th	SUMO1
2	202238585	-	115.7	-0.0408512	0.876254	0-20th	SUMO1
2	202265727	+	185.607	0.443754	0.973801	60-80th	NOP58
2	202265736	+	189.098	0.614654	0.754722	0-20th	NOP58
2	202265747	+	148.634	-0.0943936	0.965598	60-80th	NOP58
2	202265765	+	101.572	0.409159	0.933715	20-40th	NOP58
2	202265771	+	187.586	-0.307072	0.942727	40-60th	NOP58
2	206159425	-	149.436	-0.514925	0.974652	60-80th	NDUFS1
2	206159609	+	254.882	0.124036	0.991525	80-100th	EEF1B2
2	206159635	+	211.568	0.136425	0.991117	80-100th	EEF1B2
2	208255113	-	115.14	0.187955	0.969388	60-80th	IDH1
2	210002638	+	245.463	-0.0913676	0.969218	60-80th	RPE
2	215312062	+	430.208	-0.270812	0.970092	60-80th	ATIC
2	215312064	+	111.454	-0.539091	0.960199	40-60th	ATIC
2	215312081	+	313.579	-0.424349	0.930159	20-40th	ATIC
2	215312089	+	117.261	-0.252031	0.947674	40-60th	ATIC
2	215312130	+	131.068	-0.353565	0.956522	40-60th	ATIC
2	216109351	+	442.053	-0.491022	0.97921	80-100th	XRCC5
2	216109390	+	200.886	-0.0927955	0.979596	80-100th	XRCC5
2	216109405	+	174.574	-0.367475	0.984874	80-100th	XRCC5
2	216109415	+	157.827	-0.0340461	0.927983	20-40th	XRCC5
2	216498797	+	143.17	0.120628	0.967832	60-80th	RPL37A
2	216498815	+	118.898	-0.0453936	0.967427	60-80th	RPL37A
2	218399870	+	136.553	-0.238481	0.937063	20-40th	CTDSP1
2	218672002	-	117.134	-0.206142	0.962927	60-80th	RNF25
2	219218958	-	309.257	-0.104986	0.950739	40-60th	ABCB6
2	219253909	-	207.727	-0.944188	0.935185	20-40th	TUBA4A
2	219253916	-	7031.44	-1.02061	0.955231	40-60th	TUBA4A
2	219253921	-	311.298	-1.36011	0.967427	60-80th	TUBA4A
2	222656073	-	114.94	0.164705	0.927124	20-40th	FARSB
2	222656078	-	209.037	0.143785	0.94053	20-40th	FARSB
2	222656090	-	164.239	0.15784	0.97563	60-80th	FARSB
2	222861036	+	791.829	-0.823954	0.954972	40-60th	ACSL3
2	223837566	-	117.336	0.749734	0.887701	0-20th	AP1S3
2	223837582	-	165.957	0.258492	0.926316	20-40th	AP1S3
2	223837601	-	192.665	0.340879	0.926281	20-40th	AP1S3
2	223945299	-	221.754	-0.628303	0.892308	0-20th	ENSG00000286239
2	227325251	+	285.708	-0.136869	0.927083	20-40th	MFF
2	227379304	-	154.587	-0.990311	0.918993	20-40th	TM4SF20
2	227379306	-	291.077	-0.945438	0.89792	0-20th	TM4SF20
2	227472165	+	130.725	-0.1756	0.975882	60-80th	AGFG1
2	227472167	+	106.668	0.0644005	0.904988	20-40th	AGFG1
2	231056878	+	117.22	0.278755	0.975904	60-80th	PSMD1
2	231464484	-	6207.65	-0.211668	0.975885	60-80th	NCL
2	231464497	-	243.833	-0.148507	0.972355	60-80th	NCL
2	231708530	+	6881.24	0.243701	0.867911	0-20th	PTMA
2	232550689	+	262.074	-0.198142	0.963519	60-80th	EIF4E2
2	232697331	+	313.782	-0.0359138	0.975517	60-80th	GIGYF2
2	232875832	+	104.863	-1.3172	0.944444	40-60th	SNORC
2	233251672	+	198.844	0.0101559	0.952055	40-60th	ATG16L1
2	233854535	-	735.358	0.0156559	0.909617	20-40th	HJURP
2	236569825	+	183.355	-0.777454	0.844262	0-20th	ACKR3
2	237085889	+	158.076	0.289835	0.99403	80-100th	COPS8
2	237085908	+	134.6	-0.100169	0.765152	0-20th	COPS8
2	237487251	+	553.194	0.196968	0.934631	20-40th	MLPH
2	237692333	+	101.815	-0.238849	0.922078	20-40th	LRRFIP1
2	237967014	+	322.647	0.408793	0.966292	60-80th	UBE2F
2	240136303	-	721.28	0.0233391	0.985495	80-100th	COPS9
2	241102287	-	153.868	-0.253105	0.985718	80-100th	MTERF4
2	241150483	+	117.798	0.272611	0.936	20-40th	PPP1R7
2	241315225	-	119.565	-0.244503	0.991597	80-100th	HDLBP
2	241315672	-	1865.57	0.0268324	0.986381	80-100th	HDLBP
2	241637693	+	427.752	-0.344759	0.963115	60-80th	ATG4B
3	3126940	+	124.986	-0.0432601	0.981132	80-100th	TRNT1
3	3179691	-	220.287	0.173403	0.982932	80-100th	CRBN
3	4979437	+	398.995	-0.409682	0.846154	0-20th	BHLHE40
3	4979459	+	109.164	-0.579987	0.910112	20-40th	BHLHE40
3	4979463	+	257.122	-0.175713	0.873016	0-20th	BHLHE40
3	4979489	+	143.222	-0.397974	0.904437	20-40th	BHLHE40
3	5122292	+	263.274	-0.444538	0.972575	60-80th	ARL8B
3	8501825	+	109.49	0.0288747	0.907514	20-40th	LMCD1
3	9397863	+	123.977	-0.19589	0.920792	20-40th	SETD5
3	9793082	+	1135.23	-0.282609	0.95089	40-60th	ARPC4
3	9793090	+	170.434	-0.479947	0.943343	40-60th	ARPC4
3	9793108	+	120.489	-0.404704	0.961039	40-60th	ARPC4-TTLL3
3	9986829	-	122.368	-0.0910251	0.985981	80-100th	EMC3
3	9986841	-	103.467	-0.658458	0.973398	60-80th	EMC3
3	10321093	-	123.958	0.331757	0.992366	80-100th	SEC13
3	12557087	+	186.491	-0.324209	0.929825	20-40th	MKRN2
3	12841509	-	124.529	-0.0309859	0.997585	80-100th	RPL32
3	12841516	-	505.404	-0.288338	0.958071	40-60th	RPL32
3	14125023	+	119.933	0.299258	0.962025	40-60th	TMEM43
3	14125054	+	116.337	-0.336168	0.975309	60-80th	TMEM43
3	14178601	-	132.8	-0.0879831	0.977695	60-80th	XPC
3	14178849	+	156.061	-0.0664055	0.954495	40-60th	LSM3
3	14178857	+	147.156	0.249404	0.961929	40-60th	LSM3
3	14402621	+	324.025	-0.369651	0.956357	40-60th	SLC6A6
3	15601569	-	344.437	-0.100333	0.986411	80-100th	HACL1
3	16264937	-	197.918	0.184773	0.977901	60-80th	DPH3
3	23805955	+	297.41	0.536435	0.946594	40-60th	UBE2E1
3	23917120	+	103.792	0.31656	0.933265	20-40th	RPL15
3	23917127	+	402.317	0.099953	0.963374	60-80th	RPL15
3	23917135	+	255.542	-0.00819653	0.929313	20-40th	RPL15
3	23917138	+	643.751	0.089521	0.959396	40-60th	RPL15
3	23917140	+	423.804	-0.149307	0.962774	40-60th	RPL15
3	23917165	+	157.841	-0.436865	0.970397	60-80th	RPL15
3	23917176	+	115.179	-0.453378	0.95866	40-60th	RPL15
3	27484384	-	243.186	0.488712	0.947947	40-60th	SLC4A7
3	32502810	-	117.649	-0.443828	0.964497	60-80th	CMTM6
3	33097146	-	163.297	-0.375849	0.983291	80-100th	GLB1
3	33798630	+	200.536	-0.66515	0.969774	60-80th	PDCD6IP
3	33798634	+	210.726	-0.55752	0.961911	40-60th	PDCD6IP
3	36993518	+	133.719	-0.109353	0.991277	80-100th	MLH1
3	38137077	-	129.388	0.20047	0.976759	60-80th	ACAA1
3	38137089	-	136.544	-0.4836	0.973333	60-80th	ACAA1
3	40457308	+	187.853	-0.305384	0.967078	60-80th	RPL14
3	40457310	+	234.435	0.140755	0.971616	60-80th	RPL14
3	40457349	+	120.877	0.382621	0.98065	80-100th	RPL14
3	41199505	+	1918.32	0.363347	0.962834	60-80th	CTNNB1
3	48609659	-	120.614	-0.30355	0.963855	60-80th	UQCRC1
3	48609664	-	179.949	-0.671096	0.992362	80-100th	UQCRC1
3	49007387	+	176.807	-0.7147	0.993031	80-100th	WDR6
3	49007399	+	258.841	-0.27193	1	80-100th	WDR6
3	49007423	+	148.237	0.316271	0.945265	40-60th	WDR6
3	49104752	-	124.635	-1.03648	0.992606	80-100th	QARS1
3	49133046	-	101.742	0.0180282	0.929825	20-40th	LAMB2
3	49358325	-	872.962	-0.0111005	0.968699	60-80th	GPX1
3	49358353	-	117.847	0.167015	0.915146	20-40th	GPX1
3	49412094	-	237.576	0.0339357	0.93523	20-40th	RHOA
3	50088954	+	118.554	-0.368888	0.950069	40-60th	RBM5
3	50236204	+	476.212	-0.694885	0.985024	80-100th	GNAI2
3	50292429	-	244.172	-0.317181	0.941885	20-40th	IFRD2
3	51995923	-	148.691	0.69853	0.836576	0-20th	RPL29
3	51995951	-	355.751	-0.0832295	0.968215	60-80th	RPL29
3	52278646	-	344.088	-0.470954	0.976572	60-80th	WDR82
3	52536605	+	353.4	-0.416662	0.98141	80-100th	UQCC5
3	52686032	+	2384.27	-0.0777015	0.962425	40-60th	GNL3
3	52706112	+	331.448	-0.0990803	0.993289	80-100th	SPCS1
3	52706129	+	103.866	-0.0685672	0.97973	80-100th	SPCS1
3	53255987	-	556.49	-1.04611	0.977972	60-80th	TKT
3	53255994	-	178.213	-1.17149	0.97607	60-80th	TKT
3	53256016	-	1584.42	-0.649717	0.983307	80-100th	TKT
3	53256047	-	103.128	0.157083	1	80-100th	TKT
3	57597344	-	823.859	-0.0332749	0.964314	60-80th	ARF4
3	57597371	-	165.305	0.00406294	0.936709	20-40th	ARF4
3	57597378	-	298.683	-0.267888	0.961652	40-60th	ARF4
3	57756309	+	142.061	-0.208376	0.955745	40-60th	SLMAP
3	58008422	+	3364.5	-0.381012	0.93689	20-40th	FLNB
3	58433818	-	107.317	0.65069	0.970732	60-80th	PDHB
3	58526766	-	124.304	1.06334	0.977974	60-80th	ACOX2
3	66221012	+	106.555	0.49278	0.953125	40-60th	SLC25A26
3	69085023	+	193.717	-0.135245	0.941651	20-40th	ARL6IP5
3	69085036	+	125.982	-0.196352	0.937656	20-40th	ARL6IP5
3	87227285	+	203.048	0.159109	0.986395	80-100th	CHMP2B
3	87227300	+	176.668	0.357575	0.93261	20-40th	CHMP2B
3	87227312	+	489.678	0.333923	0.96721	60-80th	CHMP2B
3	98901682	-	484.719	0.586353	0.950884	40-60th	DCBLD2
3	98901165	-	112.979	-0.0904002	0.910785	20-40th	DCBLD2
3	99817862	+	311.681	0.343177	0.9845	80-100th	CMSS1
3	100260995	+	114.453	0.00381617	0.979695	80-100th	TBC1D23
3	100334757	+	309.588	-0.273405	0.985405	80-100th	NIT2
3	100709505	+	115.801	-0.20185	0.936508	20-40th	TFG
3	100709516	+	172.334	0.120926	0.964602	60-80th	TFG
3	100709518	+	249.853	-0.191339	0.968992	60-80th	TFG
3	101677132	-	123.523	0.0572663	0.953052	40-60th	ZBTB11
3	101686705	-	1208.64	-0.375282	0.9908	80-100th	RPL24
3	101779664	+	118.249	0.650028	0.918033	20-40th	NXPE3
3	105366909	+	112.916	-0.40118	0.945455	40-60th	ALCAM
3	108589431	-	114.046	-0.0667209	0.95	40-60th	CIP2A
3	111859265	+	121.902	-1.39946	0.804762	0-20th	PHLDB2
3	112641143	-	121.354	-0.12445	0.955	40-60th	CCDC80
3	113746241	-	396.626	0.256969	0.950595	40-60th	NAA50
3	113747037	+	131.957	0.0739089	0.97619	60-80th	ATP6V1A
3	119240878	-	687.613	-1.46822	0.914679	20-40th	B4GALT4
3	119463614	-	128.147	-0.683712	0.961165	40-60th	TMEM39A
3	119498552	+	140.014	-0.0822267	0.914286	20-40th	TIMMDC1
3	119498567	+	232.151	0.0121161	0.969072	60-80th	TIMMDC1
3	119677380	-	166.503	-0.523718	0.980672	80-100th	COX17
3	119677387	-	155.023	-0.418211	0.958513	40-60th	COX17
3	119677406	-	289.646	0.0399424	0.987415	80-100th	COX17
3	119677413	-	145.068	0.0809008	0.941535	20-40th	COX17
3	120349354	-	216.222	-0.405885	0.972477	60-80th	LRRC58
3	120596322	+	985.146	-0.0467434	0.990864	80-100th	NDUFB4
3	120596332	+	502.642	-0.0496272	0.93477	20-40th	NDUFB4
3	120596338	+	980.554	-0.121258	0.970689	60-80th	NDUFB4
3	120596339	+	119.126	0.00156484	0.962613	40-60th	NDUFB4
3	122384182	+	168.015	0.334968	0.989691	80-100th	FAM162A
3	122514937	-	267.599	-0.0386135	0.977654	60-80th	KPNA1
3	124730453	+	523.135	0.177528	0.969272	60-80th	UMPS
3	124730457	+	100.575	0.31428	0.952096	40-60th	UMPS
3	124887365	-	269.063	0.00354883	0.977154	60-80th	ITGB5
3	127598410	+	588.822	0.096552	0.958994	40-60th	MCM2
3	128052431	+	137.901	-0.0514029	1	80-100th	SEC61A1
3	128052434	+	238.994	0.063585	0.900552	0-20th	SEC61A1
3	128123800	-	103.631	-0.0128246	0.96413	60-80th	RUVBL1
3	128123809	-	145.586	0.423015	0.976575	60-80th	RUVBL1
3	128123812	-	262.676	0.054879	0.976309	60-80th	RUVBL1
3	128123822	-	256.065	-0.0711947	0.966483	60-80th	RUVBL1
3	128650816	-	845.902	0.0551742	0.977597	60-80th	RPN1
3	128650830	-	227.153	-0.263508	0.965753	60-80th	RPN1
3	128726183	+	191.29	0.00973937	0.971199	60-80th	RAB7A
3	128879620	+	113.65	-0.32936	0.97561	60-80th	ACAD9
3	128879623	+	147.649	-0.359599	0.972477	60-80th	ACAD9
3	129183892	-	518.486	-0.254951	0.961814	40-60th	CNBP
3	129183908	-	167.119	-0.544986	0.871256	0-20th	CNBP
3	129249606	+	467.835	-0.443145	0.953488	40-60th	COPG1
3	129249632	+	394.846	-0.263519	0.995826	80-100th	COPG1
3	129249638	+	113.941	0.0905725	0.936364	20-40th	COPG1
3	129316286	-	1696.93	-0.545839	0.935639	20-40th	H1-10
3	131502936	-	139.025	0.0295846	0.954955	40-60th	MRPL3
3	131502969	-	470.652	-0.119058	0.98784	80-100th	MRPL3
3	132417517	+	100.439	0.186025	0.990654	80-100th	DNAJC13
3	133573714	+	320.464	-0.724275	0.968689	60-80th	CDV3
3	133805845	+	195.722	0.327258	0.96732	60-80th	SRPRB
3	134374447	-	359.03	-0.696733	0.934615	20-40th	AMOTL2
3	136752378	-	124.153	-0.279442	0.875741	0-20th	STAG1
3	139389643	-	357.352	-0.0583802	0.963625	60-80th	COPB2
3	139389648	-	145.115	0.0696349	0.647404	0-20th	COPB2
3	141738305	+	296.491	0.344195	0.983871	80-100th	RNF7
3	141876643	+	2409.4	-0.134119	0.968722	60-80th	ATP1B3
3	143001619	+	200.905	-0.0655396	0.960938	40-60th	U2SURP
3	149377649	-	1273.94	-0.470534	0.786859	0-20th	TM4SF1
3	149658025	-	239.543	-0.275508	0.908425	20-40th	WWTR1
3	149658027	-	152.404	-0.233236	0.85034	0-20th	WWTR1
3	149658043	-	106.795	-0.0428971	0.935743	20-40th	WWTR1
3	150546496	-	194.664	-0.504082	0.975109	60-80th	SERP1
3	150546501	-	182.46	0.176025	0.956513	40-60th	SERP1
3	150546526	-	188.516	0.277726	0.909091	20-40th	SERP1
3	150603294	+	177.577	0.182647	0.977419	60-80th	SELENOT
3	150603323	+	284.255	0.0905031	0.967236	60-80th	SELENOT
3	152268891	+	116.186	-0.0879151	0.944056	40-60th	MBNL1
3	152268929	+	233.523	0.517415	0.940249	20-40th	MBNL1
3	154324462	-	175.954	0.36376	0.920477	20-40th	DHX36
3	154324487	-	168.378	0.0535943	0.946674	40-60th	DHX36
3	155870650	+	205.689	-0.205031	0.966387	60-80th	GMPS
3	156555119	-	198.523	0.0275169	0.94012	20-40th	SSR3
3	156555151	-	150.723	0.379728	0.53012	0-20th	SSR3
3	157160147	-	278.567	-0.709093	0.953646	40-60th	CCNL1
3	158110089	+	142.339	-0.576841	0.99318	80-100th	RSRC1
3	160399216	-	101.49	-0.230369	0.985342	80-100th	IFT80
3	160399650	+	472.779	0.190158	0.95155	40-60th	SMC4
3	160565571	-	761.893	-0.155267	0.982572	80-100th	KPNA4
3	172750726	+	253.341	-0.0767122	0.946768	40-60th	ECT2
3	179347709	+	115.071	-0.0451466	0.973451	60-80th	MFN1
3	179347735	+	167.597	0.275667	0.968904	60-80th	MFN1
3	179604634	-	149.786	-0.00859679	0.961709	40-60th	MRPL47
3	179604638	-	563.801	-0.0862018	0.967861	60-80th	MRPL47
3	179604809	+	124.382	0.0659896	0.970343	60-80th	NDUFB5
3	184174855	+	278.782	0.117219	0.972603	60-80th	AP2M1
3	184174905	+	120.491	-0.134554	0.96875	60-80th	AP2M1
3	184248962	-	159.819	-0.24331	0.979022	80-100th	ALG3
3	184314590	+	109.895	-0.160281	0.980387	80-100th	EIF4G1
3	185499035	-	185.084	-0.186554	0.959016	40-60th	TMEM41A
3	185937987	-	980.755	-0.131913	0.957619	40-60th	TRA2B
3	185938014	-	602.6	-0.509374	0.968867	60-80th	TRA2B
3	185938029	-	160.158	0.205049	0.933761	20-40th	TRA2B
3	186109089	-	387.92	0.0246349	0.979342	80-100th	ETV5
3	186242678	-	100.766	-0.45062	0.987683	80-100th	DGKG
3	187139499	-	112.144	0.0305144	0.985714	80-100th	RPL39L
3	194136145	+	175.804	-0.697318	0.959345	40-60th	HES1
3	194136148	+	303.864	-0.50315	0.851774	0-20th	HES1
3	196082090	-	860.257	0.16792	0.98632	80-100th	TFRC
3	196942526	-	109.949	-0.402843	0.970545	60-80th	NCBP2
3	197950198	+	797.697	-0.211926	0.907534	20-40th	RPL35A
3	197950204	+	420.351	-0.446256	0.989855	80-100th	RPL35A
4	1289894	+	256.95	0.0739811	0.961603	40-60th	MAEA
4	1712319	-	235.619	-0.273712	0.967643	60-80th	SLBP
4	2041995	+	202.916	-0.00458191	0.933333	20-40th	C4orf48
4	3532420	-	213.54	0.247847	0.925926	20-40th	LRPAP1
4	4290146	-	203.332	0.00793189	0.944444	40-60th	LYAR
4	4290154	-	117.31	-0.115592	0.992268	80-100th	LYAR
4	6640685	+	1971.77	0.258166	0.962932	60-80th	MRFAP1
4	6693878	+	676.695	0.450985	0.952988	40-60th	S100P
4	6693880	+	854.621	0.271789	0.932455	20-40th	S100P
4	7068075	-	174.879	0.0734643	0.928571	20-40th	GRPEL1
4	10116760	-	233.902	-0.67527	0.95671	40-60th	WDR1
4	10116794	-	875.231	-0.213802	0.972431	60-80th	WDR1
4	10116799	-	480.589	-0.359854	0.97807	60-80th	WDR1
4	24584539	-	110.583	0.118004	0.937468	20-40th	DHX15
4	25234033	+	123.469	-0.23284	0.976	60-80th	PI4K2B
4	37686376	-	101.177	-0.219174	0.956522	40-60th	RELL1
4	38867778	+	214.34	-0.235309	0.983871	80-100th	FAM114A1
4	39458922	-	2556.65	0.0411549	0.987378	80-100th	RPL9
4	39458898	-	122.772	-0.204942	0.923889	20-40th	RPL9
4	39458935	-	130.334	0.205496	0.970428	60-80th	RPL9
4	39458941	-	136.405	-0.167471	0.972521	60-80th	RPL9
4	39458948	-	221.919	0.123025	0.967655	60-80th	RPL9
4	39527440	-	125.216	0.461416	0.867265	0-20th	UGDH
4	39698139	+	129.033	0.00866999	0.943241	40-60th	UBE2K
4	41256928	+	4884.44	-0.537454	0.997191	80-100th	UCHL1
4	41360807	+	131.587	-1.4941	0.930556	20-40th	LIMCH1
4	41935137	+	221.11	-0.24107	0.981283	80-100th	TMEM33
4	41935152	+	331.936	0.261147	0.976106	60-80th	TMEM33
4	41990530	+	211.97	0.153807	0.976159	60-80th	SLC30A9
4	41990534	+	108.519	-0.30656	0.9935	80-100th	SLC30A9
4	56436138	+	175.991	-0.0819715	0.993464	80-100th	PAICS
4	56436260	+	1093.16	0.0429131	0.98797	80-100th	PAICS
4	56436262	+	135.77	0.219215	0.962441	40-60th	PAICS
4	56436291	+	157.574	-0.225427	0.969027	60-80th	PAICS
4	56467633	+	133.983	0.599109	0.961263	40-60th	SRP72
4	56978896	+	411.017	0.0526079	0.950599	40-60th	POLR2B
4	57110385	-	1022.23	-1.1682	0.972369	60-80th	IGFBP7
4	70688532	+	121.412	-0.165257	0.975415	60-80th	UTP3
4	70839890	-	1965.3	0.0309274	0.97084	60-80th	GRSF1
4	73998677	-	324.348	-0.90197	0.809344	0-20th	CXCL5
4	74365145	+	1721.17	0.519008	0.861331	0-20th	EREG
4	74445136	+	950.338	0.017901	0.953678	40-60th	AREG
4	75514473	+	162.887	0.160023	0.979646	80-100th	THAP6
4	75673412	-	514.213	0.152275	0.965888	60-80th	G3BP2
4	76213824	-	115.721	-0.32915	0.925373	20-40th	SCARB2
4	77862832	+	106.99	0.676128	0.953658	40-60th	MRPL1
4	78551770	+	179.3	-1.34717	0.65035	0-20th	ANXA3
4	83035201	+	121.843	-0.588939	1	80-100th	COPS4
4	83284795	-	154.197	-0.23886	1	80-100th	COQ2
4	87975711	+	292.72	0.281034	0.988506	80-100th	SPP1
4	87975714	+	3010.62	0.456167	0.966881	60-80th	SPP1
4	87975717	+	176.181	0.299945	0.934853	20-40th	SPP1
4	88523705	-	149.187	-0.178058	0.970443	60-80th	PYURF
4	88523746	-	123.752	0.325604	0.924528	20-40th	PYURF
4	88523755	-	280.17	0.0612588	0.984615	80-100th	PYURF
4	94451942	+	298.466	-0.423752	0.943186	40-60th	PDLIM5
4	98929125	-	347.956	-0.100404	0.974288	60-80th	EIF4E
4	99088710	-	113.304	0.388367	0.974852	60-80th	ADH5
4	99088713	-	1059.94	-0.101718	0.99023	80-100th	ADH5
4	99088730	-	231.838	-0.388146	0.991107	80-100th	ADH5
4	99950273	-	912.639	-0.120686	0.960824	40-60th	H2AZ1
4	99950278	-	280.152	-0.134853	0.980666	80-100th	H2AZ1
4	102827551	-	337.199	-0.0574059	0.916147	20-40th	UBE2D3
4	105474059	-	693.797	0.458132	0.983234	80-100th	PPA2
4	105474068	-	105.618	0.383182	0.962963	60-80th	PPA2
4	106316517	+	193.759	0.149552	0.941472	20-40th	AIMP1
4	108620588	+	174.81	-0.039063	0.972414	60-80th	RPL34
4	108650610	+	107.451	0.0245754	0.948936	40-60th	OSTC
4	108650626	+	173.519	-0.0743295	0.700787	0-20th	OSTC
4	109815525	+	266.078	-0.352743	0.931237	20-40th	GAR1
4	119212713	+	119.493	-0.0869681	0.929682	20-40th	USP53
4	119300617	-	196.505	-0.775484	0.961944	40-60th	C4orf3
4	119300626	-	156.734	-0.463226	0.945161	40-60th	C4orf3
4	120066827	-	124.793	0.218179	0.937295	20-40th	MAD2L1
4	121696975	-	207.588	-1.02396	0.944212	40-60th	ANXA5
4	121696980	-	640	-0.596735	0.958827	40-60th	ANXA5
4	122826834	+	150.768	-0.248088	0.979433	80-100th	FGF2
4	127782322	+	100.361	0.465291	0.964844	60-80th	HSPA4L
4	139015781	+	318.014	-0.139769	0.972222	60-80th	NOCT
4	139301500	+	158.621	0.0677471	0.935961	20-40th	NAA15
4	139301527	+	167.857	-0.332676	0.964775	60-80th	NAA15
4	139556219	-	110.402	0.355564	0.983607	80-100th	SETD7
4	140373649	+	125.943	-0.548214	0.961496	40-60th	SCOC
4	141220903	+	127.378	0.116832	0.946565	40-60th	ZNF330
4	145098311	+	635.214	-0.215549	0.852564	0-20th	ABCE1
4	145098317	+	135.865	0.016373	0.91529	20-40th	ABCE1
4	151099602	+	140.844	0.299137	0.964997	60-80th	RPS3A
4	151099621	+	1770.19	0.181549	0.971969	60-80th	RPS3A
4	154550421	-	182.057	0.223016	0.977846	60-80th	PLRG1
4	154590742	-	102.495	-2.16333	0.902991	20-40th	FGA
4	158723392	-	146.001	0.0686126	0.958763	40-60th	PPID
4	163494690	+	199.687	-0.079033	0.966418	60-80th	TMA16
4	165327686	+	114.464	-0.216324	0.975155	60-80th	MSMO1
4	173334353	-	577.346	-0.395207	0.948694	40-60th	HMGB2
4	173334358	-	404.602	-0.43894	0.956347	40-60th	HMGB2
4	174522487	-	575.145	0.678216	0.960699	40-60th	HPGD
4	176319988	+	124.883	-0.027568	1	80-100th	SPCS3
4	177309874	+	250.315	-1.57007	0.9107	20-40th	NEIL3
4	184649447	-	103.027	0.10244	0.945394	40-60th	CASP3
4	188109603	-	917.413	0.882392	0.895532	0-20th	TRIML2
5	218153	-	242.581	-0.320927	0.974359	60-80th	CCDC127
5	271624	+	313.381	-0.08173	0.932836	20-40th	PDCD6
5	271646	+	530.071	-0.0988199	0.984177	80-100th	PDCD6
5	1799837	-	156.881	0.273708	0.900642	20-40th	MRPL36
5	1801400	+	606.054	0.0102134	0.969849	60-80th	NDUFS6
5	1801407	+	656.009	-0.217916	0.985416	80-100th	NDUFS6
5	1801415	+	643.65	0.320358	0.968463	60-80th	NDUFS6
5	10250276	+	101.004	-0.0728721	0.942553	20-40th	CCT5
5	10250282	+	800.529	0.00628022	0.96385	60-80th	CCT5
5	10250296	+	342.633	-0.193348	0.987584	80-100th	CCT5
5	10250320	+	104.514	-0.260781	0.954202	40-60th	CCT5
5	10250323	+	410.382	0.175078	0.958796	40-60th	CCT5
5	10353892	+	132.114	0.230641	0.981907	80-100th	MARCHF6
5	16465800	-	308.084	0.144615	0.943112	40-60th	ZNF622
5	17217631	+	2489.26	-0.142708	0.916114	20-40th	BASP1
5	17217634	+	480.32	0.0436995	0.919732	20-40th	BASP1
5	32585557	+	3251.78	0.0730796	0.970872	60-80th	SUB1
5	32585574	+	600.684	-0.269496	0.986046	80-100th	SUB1
5	32710649	+	166.344	-1.01285	0.917127	20-40th	NPR3
5	33440971	+	166.045	-0.550211	0.989605	80-100th	TARS1
5	33440993	+	355.111	0.34419	0.966713	60-80th	TARS1
5	33441019	+	106.445	0.147621	0.970732	60-80th	TARS1
5	34915504	-	315.761	-0.069289	0.954442	40-60th	RAD1
5	40798177	-	182.432	-0.355993	0.945783	40-60th	PRKAA1
5	40835194	-	704.67	-0.153593	0.969957	60-80th	RPL37
5	40835238	-	199.849	0.184683	0.960429	40-60th	RPL37
5	41904336	+	109.872	0.416525	0.961538	40-60th	RIMOC1
5	44808959	+	153.969	0.0731072	0.918605	20-40th	MRPS30
5	53109754	-	184.282	-0.218741	0.972168	60-80th	MOCS2
5	53560639	+	952.773	-0.359574	0.994518	80-100th	NDUFS4
5	55160180	+	354.303	0.197438	0.98555	80-100th	GPX8
5	55307989	+	177.626	-0.20717	0.985517	80-100th	MTREX
5	55308001	+	396.829	0.0698857	0.96971	60-80th	MTREX
5	58460084	-	662.299	0.188016	0.868567	0-20th	PLK2
5	60700134	-	286.353	-0.0667754	0.98913	80-100th	DEPDC1B
5	61332258	+	193.65	-0.066982	0.968556	60-80th	ZSWIM6
5	62403882	-	188.891	0.580805	0.985221	80-100th	DIMT1
5	65563149	-	172.507	0.255676	0.856538	0-20th	CENPK
5	65722247	+	181.574	-0.423511	0.932203	20-40th	NLN
5	69189574	+	112.906	-0.230817	0.973995	60-80th	CENPH
5	69217808	+	367.706	-0.0817665	0.987177	80-100th	MRPS36
5	69369490	-	256.741	-0.213859	0.952381	40-60th	TAF9
5	69369528	-	254.619	-0.103798	0.957576	40-60th	TAF9
5	72320224	-	161.619	0.58959	0.955048	40-60th	MRPS27
5	72320231	-	250.355	0.136852	0.959302	40-60th	MRPS27
5	72816672	+	103.217	-0.0763621	0.911765	20-40th	TNPO1
5	72848126	+	114.819	-0.539949	0.942935	40-60th	TNPO1
5	72848167	+	138.63	-0.618792	0.973282	60-80th	TNPO1
5	72848170	+	246.764	-0.528034	0.982524	80-100th	TNPO1
5	72848173	+	635.772	-0.241786	0.95272	40-60th	TNPO1
5	73498431	+	410.467	0.109847	0.967151	60-80th	BTF3
5	73498448	+	3798.25	-0.139337	0.990343	80-100th	BTF3
5	73498455	+	754.435	-0.171899	0.970194	60-80th	BTF3
5	73565743	+	268.395	-0.0027267	0.987374	80-100th	UTP15
5	74685233	+	127.056	-0.0575462	0.978814	60-80th	HEXB
5	74767241	+	229.574	0.0381629	0.984518	80-100th	NSA2
5	74767249	+	123.036	0.135246	0.978707	60-80th	NSA2
5	76623380	-	235.756	-0.918256	0.90051	0-20th	F2RL2
5	76819059	+	443.209	0.0502208	0.931034	20-40th	F2RL1
5	77776306	-	329.539	0.213062	0.924198	20-40th	TBCA
5	77776327	-	120.6	-0.315522	0.985185	80-100th	TBCA
5	77776333	-	245.734	-0.0277997	0.987654	80-100th	TBCA
5	77776335	-	103.964	-0.32553	0.874317	0-20th	TBCA
5	77776337	-	681.741	0.179514	0.977824	60-80th	TBCA
5	81301587	+	112.737	0.0500811	0.972414	60-80th	ZCCHC9
5	81301607	+	126.901	-0.182015	0.925651	20-40th	ZCCHC9
5	81301618	+	106.754	-0.0688717	0.905473	20-40th	ZCCHC9
5	82278343	-	172.699	-0.278861	0.877776	0-20th	RPS23
5	83077385	-	108.582	-0.0508596	0.960251	40-60th	TMEM167A
5	83077394	-	106.254	-0.110665	0.981013	80-100th	TMEM167A
5	86617928	+	556.619	0.330797	0.96851	60-80th	COX7C
5	86617935	+	325.538	-0.228621	0.970436	60-80th	COX7C
5	86617947	+	1391.68	0.315782	0.958115	40-60th	COX7C
5	86617965	+	123.596	0.545502	0.982442	80-100th	COX7C
5	86617968	+	790.109	1.08817	0.97452	60-80th	COX7C
5	86617977	+	114.516	0.0384713	0.796085	0-20th	COX7C
5	86618010	+	101.138	0.0450192	0.749127	0-20th	COX7C
5	95081645	-	115.947	-0.717546	0.956696	40-60th	MCTP1
5	95554977	-	101.254	-0.482069	0.973552	60-80th	SKIC3
5	95822722	-	263.168	-0.456497	0.935579	20-40th	GLRX
5	97183288	-	124.372	-0.223813	0.974684	60-80th	RIOK2
5	112922224	-	121.567	-0.150713	0.970149	60-80th	REEP5
5	112922227	-	615.095	-0.0802874	0.981128	80-100th	REEP5
5	112922239	-	187.027	0.22535	0.975836	60-80th	REEP5
5	112922251	-	154.658	0.0535675	0.941748	20-40th	REEP5
5	116085025	+	115.107	-0.213008	0.971963	60-80th	COMMD10
5	116085035	+	120.807	-0.124684	0.973301	60-80th	COMMD10
5	119452497	+	118.545	-0.00416752	0.988019	80-100th	HSD17B4
5	122845613	+	110.567	-0.654636	0.963964	60-80th	SNX24
5	126595198	-	254.064	-0.376953	0.942344	20-40th	ALDH7A1
5	126595219	-	419.75	-0.132136	0.978878	60-80th	ALDH7A1
5	126600947	+	115.936	-0.0655975	0.966759	60-80th	PHAX
5	126777160	+	188.342	-0.406949	0.943114	40-60th	LMNB1
5	127517640	+	121.537	-0.293767	0.984704	80-100th	PRRC1
5	128083766	+	367.411	0.505677	0.949303	40-60th	SLC12A2
5	131165298	-	521.563	-0.174912	0.997589	80-100th	HINT1
5	131165306	-	146.068	-0.354981	0.9375	20-40th	HINT1
5	131165317	-	129.78	-0.358812	0.966292	60-80th	HINT1
5	132556977	+	143.986	-0.39299	0.953421	40-60th	RAD50
5	132866640	+	358.361	0.011574	0.976544	60-80th	UQCRQ
5	132866643	+	141.797	-0.412156	0.958549	40-60th	UQCRQ
5	132866651	+	2095.64	0.175227	0.982518	80-100th	UQCRQ
5	133051949	+	339.332	-0.189577	0.98893	80-100th	HSPA4
5	133052034	+	541.423	-0.0684473	0.984375	80-100th	HSPA4
5	133968630	-	231.994	-0.27337	0.813559	0-20th	C5orf15
5	134176972	-	293.67	0.071503	0.994536	80-100th	SKP1
5	134176977	-	819.83	0.292814	0.969789	60-80th	SKP1
5	134226071	-	318.397	-0.088972	0.94386	40-60th	PPP2CA
5	134226073	-	363.765	0.197085	0.947674	40-60th	PPP2CA
5	134226076	-	167.849	0.0414164	0.962828	60-80th	PPP2CA
5	134411881	-	226.435	-0.224906	0.97191	60-80th	CDKN2AIPNL
5	134632809	-	144.065	0.178562	0.969925	60-80th	SAR1B
5	136028953	+	112.843	-0.170867	1	80-100th	TGFBI
5	136028958	+	338.834	-0.596752	0.968137	60-80th	TGFBI
5	136028962	+	177.8	-0.55903	0.974684	60-80th	TGFBI
5	136028991	+	4620.54	-0.70942	0.9441	40-60th	TGFBI
5	136132845	+	107.166	-0.352412	0.977273	60-80th	SMAD5
5	138178630	-	104.525	-0.289979	0.985294	80-100th	BRD8
5	138179169	+	247.561	-0.814786	0.975921	60-80th	KIF20A
5	138338266	+	161.317	0.0898187	0.965517	60-80th	FAM53C
5	138543209	-	121.028	0.114184	0.971098	60-80th	ETF1
5	138543233	-	165.763	0.0916947	0.969805	60-80th	ETF1
5	138575374	-	147.618	-0.784242	0.981945	80-100th	HSPA9
5	138575381	-	135.319	-0.314823	0.992093	80-100th	HSPA9
5	138575386	-	130.404	-0.149586	0.967532	60-80th	HSPA9
5	138575399	-	273.614	-0.263526	0.887097	0-20th	HSPA9
5	138575401	-	2226.68	0.0246529	0.976767	60-80th	HSPA9
5	138575419	-	363.456	0.361885	0.953057	40-60th	HSPA9
5	138753420	+	488.043	-0.153249	0.982063	80-100th	CTNNA1
5	138753448	+	284.979	-0.251383	0.977074	60-80th	CTNNA1
5	138753450	+	133.148	0.0676334	0.96166	40-60th	CTNNA1
5	138753452	+	235.063	0.146695	0.867368	0-20th	CTNNA1
5	139293743	+	222.473	-0.315129	0.97497	60-80th	MATR3
5	140175188	+	358.015	-0.191877	0.959956	40-60th	CYSTM1
5	140303086	-	304.202	-0.00216654	0.949767	40-60th	PFDN1
5	140303094	-	152.13	-0.171046	0.956897	40-60th	PFDN1
5	140564828	+	398.352	0.298079	0.98042	80-100th	SLC35A4
5	140647628	-	261.481	-0.307806	0.954787	40-60th	NDUFA2
5	140647831	+	120.869	-0.0973652	0.951725	40-60th	IK
5	140664853	+	181.097	0.171102	0.937742	20-40th	WDR55
5	140691370	-	199.599	0.0824674	0.982456	80-100th	HARS1
5	140700447	+	1350.44	0.083349	0.959803	40-60th	ZMAT2
5	141320784	-	394.106	0.159869	0.94794	40-60th	TAF7
5	146182603	-	118.25	-0.0303659	0.979381	80-100th	LARS1
5	146182623	-	144.974	-0.0686898	0.956306	40-60th	LARS1
5	149551391	-	131.886	0.133995	0.922097	20-40th	CSNK1A1
5	150449742	-	880.131	0.0109084	0.981426	80-100th	RPS14
5	150701062	-	150.263	-0.547133	0.939726	20-40th	RBM22
5	151020591	+	213.924	-1.89412	0.983607	80-100th	GPX3
5	151081034	-	121.122	-0.330403	0.936364	20-40th	TNIP1
5	154938199	-	150.416	-0.18324	0.967337	60-80th	GEMIN5
5	159263290	+	409.029	0.309168	0.951786	40-60th	UBLCP1
5	160419081	-	169.981	0.377311	0.953932	40-60th	SLU7
5	160421829	+	246.247	-0.131488	0.980765	80-100th	PTTG1
5	160421834	+	288.251	0.169031	0.976417	60-80th	PTTG1
5	160421855	+	1020.49	-0.235474	0.977376	60-80th	PTTG1
5	160421866	+	574.079	-0.321584	0.979324	80-100th	PTTG1
5	163460632	+	256.438	0.180192	0.946042	40-60th	HMMR
5	163460639	+	127.977	-0.675918	0.954988	40-60th	HMMR
5	163460643	+	303.704	-0.381639	0.962836	60-80th	HMMR
5	163460660	+	133.235	-0.218491	0.973863	60-80th	HMMR
5	168486471	+	631.376	-0.0936265	0.955153	40-60th	RARS1
5	169583773	+	114.028	-0.441419	0.945148	40-60th	SPDL1
5	169583784	+	166.78	-0.0782974	0.961538	40-60th	SPDL1
5	172959424	+	559.248	-0.373511	0.971968	60-80th	RPL26L1
5	172959440	+	264.132	-0.364582	0.9678	60-80th	RPL26L1
5	172983773	+	270.796	-0.803589	0.942139	20-40th	ATP6V0E1
5	172983775	+	127.114	0.421831	0.849206	0-20th	ATP6V0E1
5	172983796	+	285.243	-0.0383808	0.96351	60-80th	ATP6V0E1
5	172983800	+	356.009	-0.282249	0.93617	20-40th	ATP6V0E1
5	172983802	+	470.993	-0.097693	0.943665	40-60th	ATP6V0E1
5	175871578	+	253.955	-0.596598	0.940541	20-40th	CPLX2
5	176361785	-	115.398	-0.195884	0.988889	80-100th	KIAA1191
5	176361791	-	331.533	0.0577797	0.974729	60-80th	KIAA1191
5	176361798	-	166.295	-0.129829	0.975155	60-80th	KIAA1191
5	176388580	-	201.501	-0.0227534	0.924892	20-40th	NOP16
5	176388598	-	569.766	0.0442471	0.950838	40-60th	NOP16
5	176388737	+	126.648	-0.35129	0.978659	60-80th	HIGD2A
5	176388758	+	209.731	-0.218155	0.943593	40-60th	HIGD2A
5	176388761	+	216.219	-0.456882	0.981013	80-100th	HIGD2A
5	176416578	-	162.14	0.158731	0.923077	20-40th	CLTB
5	177086914	+	130.089	-0.98682	0.981818	80-100th	FGFR4
5	177303811	+	167.696	0.280847	0.963616	60-80th	PRELID1
5	177473624	-	126.01	0.0729899	0.956143	40-60th	DBN1
5	177497601	-	638.427	-0.442671	0.990196	80-100th	PDLIM7
5	177592199	+	137.266	-0.447354	0.996216	80-100th	TMED9
5	177592203	+	435.847	-0.458832	0.987203	80-100th	TMED9
5	178153864	-	225.464	-0.278382	0.866667	0-20th	NHP2
5	178153874	-	382.561	-0.123001	0.970383	60-80th	NHP2
5	178153884	-	456.918	0.132772	0.980756	80-100th	NHP2
5	178153885	-	574.183	0.124571	0.975738	60-80th	NHP2
5	178204533	+	4910.23	-0.113046	0.942052	20-40th	HNRNPAB
5	179623670	-	2644.21	0.0846846	0.962198	40-60th	HNRNPH1
5	179698927	+	142.031	-0.0566882	0.984772	80-100th	CANX
5	179698967	+	742.115	-0.0928213	0.975554	60-80th	CANX
5	179698978	+	102.371	-0.0641073	0.894191	0-20th	CANX
5	179806866	-	153.461	0.107385	0.963982	60-80th	MGAT4B
5	179820905	+	27257.1	0.401621	0.880161	0-20th	SQSTM1
5	181243845	-	391.128	-0.589382	0.965035	60-80th	RACK1
5	181243863	-	113.471	-0.511608	0.960131	40-60th	RACK1
5	181243897	-	1471.52	-0.319447	0.955619	40-60th	RACK1
6	2999878	+	102.487	0.0469463	0.698413	0-20th	NQO2
6	2999896	+	170.502	-0.169378	0.975309	60-80th	NQO2
6	3157544	-	540.463	0.222379	1	80-100th	TUBB2A
6	4135575	-	263.872	-0.706255	0.978768	60-80th	ECI2
6	7313182	-	260.005	-0.548452	0.977011	60-80th	SSR1
6	7910788	-	166.691	0.105948	0.962264	40-60th	TXNDC5
6	8102539	-	176.644	-0.146888	0.97065	60-80th	EEF1E1
6	10694972	+	116.054	-0.031253	0.957436	40-60th	PAK1IP1
6	10723113	+	107.456	-0.669105	0.993671	80-100th	TMEM14C
6	10723168	+	381.161	-0.118624	0.974929	60-80th	TMEM14C
6	10723191	+	168.138	-0.0444482	0.968208	60-80th	TMEM14C
6	10747794	+	165.419	-0.206713	0.965517	60-80th	ENSG00000272162
6	10747801	+	379.905	-0.203017	0.960716	40-60th	TMEM14B
6	10747805	+	505.032	-0.0445998	0.961177	40-60th	TMEM14B
6	10747819	+	148.457	-0.0896546	0.948276	40-60th	TMEM14B
6	11232668	-	343.854	0.0349119	0.938545	20-40th	NEDD9
6	12290361	+	2867.37	-0.195476	0.86921	0-20th	EDN1
6	13615335	+	542.332	0.225407	0.970779	60-80th	NOL7
6	13615344	+	106.464	-0.178025	1	80-100th	NOL7
6	24402936	+	121.437	-0.0834017	0.969319	60-80th	MRS2
6	24667077	+	208.283	-0.898409	0.972749	60-80th	ACOT13
6	24667084	+	115.933	0.158431	0.972222	60-80th	ACOT13
6	24774940	+	117.847	-0.260763	0.959619	40-60th	GMNN
6	26020456	+	760.045	0.127037	0.837963	0-20th	H3C1
6	26021649	+	1579.59	0.17	0.774846	0-20th	H4C1
6	26027281	-	612.611	0.163134	0.795505	0-20th	H4C2
6	26032097	-	944.289	0.305	0.881696	0-20th	H3C2
6	26032099	-	23041	0.137036	0.763292	0-20th	H3C2
6	26033616	-	2871.85	-0.0144083	0.704918	0-20th	H2AC4
6	26043711	-	2770.09	-0.273927	0.72038	0-20th	H2BC3
6	26045384	+	13385.4	-0.297279	0.731277	0-20th	H3C3
6	26045386	+	1396.94	-0.0251571	0.894039	0-20th	H3C3
6	26056470	-	13104.9	-0.0259199	0.855576	0-20th	H1-2
6	26103933	+	5564.75	-0.447815	0.873557	0-20th	H4C3
6	26123923	-	504.509	-0.253282	0.876623	0-20th	H2BC4
6	26123925	-	444.891	-0.113763	0.857143	0-20th	H2BC4
6	26156331	+	624.994	0.0909905	0.632075	0-20th	H1-4
6	26158122	+	4115.32	-0.27108	0.883629	0-20th	H2BC5
6	26158125	+	6849.56	-0.0642742	0.852822	0-20th	H2BC5
6	26183756	+	251.136	-0.117366	0.886926	0-20th	H2BC6
6	26189110	-	3344.28	-0.14763	0.847004	0-20th	H4C4
6	26204610	+	3176.35	0.184646	0.922648	20-40th	H4C5
6	26224178	+	105.411	-0.0937497	0.956033	40-60th	H3C6
6	26234987	-	8191.99	-0.169425	0.672294	0-20th	H1-3
6	26234989	-	6140.62	-0.298327	0.636799	0-20th	H1-3
6	26250635	-	4407.87	-0.263199	0.920498	20-40th	H3C7
6	26272931	+	1396.88	-0.20973	0.960295	40-60th	H2BC10
6	26272934	+	2162.04	-0.110751	0.88715	0-20th	H2BC10
6	26285534	-	1054.29	0.0595856	0.831232	0-20th	H4C8
6	26457955	+	144.021	-0.139679	0.955752	40-60th	BTN2A1
6	27132638	-	130.683	0.261222	0.910112	20-40th	H2BC11
6	27132795	-	11122.8	0.187294	0.920264	20-40th	H2BC11
6	27133038	+	915.838	-0.228007	0.891799	0-20th	H2AC11
6	27139282	+	3870.23	-0.222624	0.855108	0-20th	H4C9
6	27139284	+	234.222	-0.569487	0.739437	0-20th	H4C9
6	27146852	-	1590.49	0.240352	0.87159	0-20th	H2BC12
6	27146855	-	10226.4	0.162309	0.942153	20-40th	H2BC12
6	27147106	+	27511.6	0.130971	0.842517	0-20th	H2AC12
6	27147112	+	209.989	-0.33994	0.806452	0-20th	H2AC12
6	27808173	+	26457.4	-0.134327	0.885352	0-20th	H2AC13
6	27810052	+	416.494	-0.00262284	0.719626	0-20th	H3C10
6	27810053	+	202.028	-0.169658	0.565217	0-20th	H3C10
6	27814777	-	10243.4	-0.143335	0.890162	0-20th	H2AC14
6	27815016	+	252.905	-0.0592842	0.743489	0-20th	H2BC14
6	27831560	-	379.09	-0.28566	0.884058	0-20th	H4C12
6	27838369	-	509.769	-0.32231	0.724652	0-20th	H2AC15
6	27838375	-	2153.52	-0.319541	0.799686	0-20th	H2AC15
6	27838543	+	225.278	-0.268639	0.931298	20-40th	H2BC15
6	27838549	+	176.166	-0.45487	0.846512	0-20th	H2BC15
6	27838557	+	716.616	-0.304376	0.912351	20-40th	H2BC15
6	27838569	+	4409.18	-0.279499	0.789482	0-20th	H2BC15
6	27838578	+	173.976	-0.254129	0.855172	0-20th	H2BC15
6	27838585	+	168.156	-0.280217	0.794549	0-20th	H2BC15
6	27867588	-	5945.75	-0.345873	0.871648	0-20th	H1-5
6	27872346	-	2292.23	-0.352853	0.845333	0-20th	H3C11
6	27890826	-	14625.9	-0.59012	0.84641	0-20th	H3C12
6	27893181	-	306.58	-0.0956338	0.605263	0-20th	H2AC17
6	27893185	-	19037.9	0.103262	0.924236	20-40th	H2AC17
6	27893425	+	2306.41	-0.0601445	0.892354	0-20th	H2BC17
6	28923971	-	104.812	0.400749	0.862069	0-20th	TRIM27
6	29942532	+	519.89	-0.469885	0.996213	80-100th	HLA-A
6	30489512	+	214.801	-0.390187	0.975334	60-80th	HLA-E
6	30571444	+	115.361	-0.235395	0.961111	40-60th	ABCF1
6	30617243	-	169.741	0.39151	0.819502	0-20th	PPP1R10
6	30617840	+	298.002	-0.0246187	0.958957	40-60th	MRPS18B
6	30617858	+	124.812	-0.0307732	0.86985	0-20th	MRPS18B
6	30672996	-	167.767	-0.186406	0.959551	40-60th	DHX16
6	30720357	+	3740.13	-0.398118	0.981677	80-100th	TUBB
6	30720360	+	385.284	-0.561467	0.945034	40-60th	TUBB
6	30720382	+	195.656	-0.376219	0.914634	20-40th	TUBB
6	30744547	-	1871.87	0.101312	0.873155	0-20th	IER3
6	31541970	-	219.156	-0.516113	0.968905	60-80th	DDX39B
6	31542003	-	552.299	0.155014	0.987743	80-100th	DDX39B
6	31542008	-	117.907	0.199159	0.92855	20-40th	DDX39B
6	31666101	+	613.169	-0.133206	0.954416	40-60th	CSNK2B
6	31736513	-	100.698	0.348387	0.978497	60-80th	CLIC1
6	31815541	+	857.684	-0.0850769	0.965636	60-80th	HSPA1A
6	31815543	+	6478.54	0.507125	0.939689	20-40th	HSPA1A
6	31815544	+	314.975	-0.597203	0.911617	20-40th	HSPA1A
6	31827737	+	4071.17	0.501853	0.971736	60-80th	HSPA1B
6	31827738	+	903.824	0.316392	0.946469	40-60th	HSPA1B
6	31827739	+	268.325	0.461285	0.919614	20-40th	HSPA1B
6	31827740	+	548.14	0.0567055	0.920354	20-40th	HSPA1B
6	31959175	+	186.68	-0.27974	0.985075	80-100th	SKIC2
6	32972201	+	407.922	0.464105	0.927114	20-40th	BRD2
6	33272084	+	230.594	0.117796	0.935452	20-40th	RPS18
6	33289601	+	300.434	-0.168942	0.953719	40-60th	PFDN6
6	33314254	-	111.318	-0.584684	0.914773	20-40th	TAPBP
6	33418103	-	287.394	0.11589	0.962264	40-60th	CUTA
6	33418107	-	153.584	0.173409	0.969494	60-80th	CUTA
6	34236879	+	170.981	0.521122	0.918455	20-40th	HMGA1
6	34236910	+	115.312	0.0297724	0.942815	40-60th	HMGA1
6	34426062	-	238.83	-0.873747	0.988846	80-100th	RPS10
6	34757497	+	168.07	0.605107	0.979051	80-100th	SNRPC
6	34757510	+	109.936	0.0890503	0.96513	60-80th	SNRPC
6	34757514	+	632.87	0.194901	0.986282	80-100th	SNRPC
6	34757519	+	129.368	-0.317406	0.878011	0-20th	SNRPC
6	34757526	+	186.518	0.180526	0.975657	60-80th	SNRPC
6	34757536	+	134.395	-0.31978	0.976905	60-80th	SNRPC
6	34888042	-	160.494	-0.161391	0.954097	40-60th	TAF11
6	35468401	+	262.566	-0.506517	0.983355	80-100th	RPL10A
6	35468417	+	142.25	-0.669367	0.973094	60-80th	RPL10A
6	35921095	-	242.522	-0.126877	0.973808	60-80th	SRPK1
6	36594367	+	226.687	0.371791	0.925373	20-40th	SRSF3
6	36678710	+	494.417	0.651775	0.878509	0-20th	CDKN1A
6	36874792	-	217.79	0.0707496	0.956522	40-60th	PPIL1
6	36874796	-	424.743	0.125361	0.982857	80-100th	PPIL1
6	36874803	-	101.746	-0.430962	0.973118	60-80th	PPIL1
6	38703127	-	154.12	-0.365448	0.933333	20-40th	GLO1
6	38703135	-	135.167	-0.0185445	0.879377	0-20th	GLO1
6	38703145	-	1430.55	0.18015	0.973165	60-80th	GLO1
6	38703176	-	137.379	0.257539	0.943662	40-60th	GLO1
6	41787641	+	111.861	0.179102	0.97037	60-80th	TOMM6
6	41787660	+	426.015	0.278852	0.928571	20-40th	TOMM6
6	41787671	+	240.159	-0.455952	0.97619	60-80th	TOMM6
6	41787681	+	290.216	0.0696146	0.971777	60-80th	TOMM6
6	41787687	+	375.76	-0.107226	0.981478	80-100th	TOMM6
6	41787695	+	457.317	-0.129462	0.975299	60-80th	TOMM6
6	41921499	+	401.648	0.12508	0.9636	60-80th	BYSL
6	42879917	+	120.846	0.486628	0.954545	40-60th	RPL7L1
6	43021626	+	192.063	-0.268189	0.956844	40-60th	RRP36
6	43059402	-	113.839	0.0793101	0.951264	40-60th	MRPL2
6	43517089	+	106.007	-0.0391154	0.911263	20-40th	POLR1C
6	43576185	+	232.761	0.366619	0.950869	40-60th	POLH
6	44223595	+	106.487	-0.39321	0.97861	60-80th	SLC29A1
6	44247097	+	4633.49	-0.527286	0.978207	60-80th	HSP90AB1
6	44247111	+	146.274	-0.28435	0.895699	0-20th	HSP90AB1
6	44257528	-	181.878	-0.0949012	0.970588	60-80th	SLC35B2
6	44387710	+	259.198	-0.106393	0.978622	60-80th	CDC5L
6	47309905	-	302.897	1.13463	0.902778	20-40th	TNFRSF21
6	53545098	-	268.188	0.158018	0.907204	20-40th	GCLC
6	53545101	-	696.417	0.254019	0.916303	20-40th	GCLC
6	56642889	-	114.936	-1.05072	0.9138	20-40th	DST
6	57172306	+	153.026	-0.163758	0.952015	40-60th	BAG2
6	57172326	+	344.871	-0.191746	0.985376	80-100th	BAG2
6	73452276	-	122.325	0.0534321	0.922464	20-40th	CGAS
6	75243767	-	205.423	0.221727	0.979737	80-100th	COX7A2
6	75243786	-	451.689	0.336373	0.967429	60-80th	COX7A2
6	75243807	-	163.416	-0.177289	0.957252	40-60th	COX7A2
6	80004650	+	128.258	-0.250699	0.964763	60-80th	TTK
6	82247723	-	117.25	0.0184698	0.907121	20-40th	IBTK
6	82247744	-	151.617	-0.336186	0.971831	60-80th	IBTK
6	83431051	-	277.946	0.697403	0.961165	40-60th	ME1
6	85450083	+	114.058	1.05901	0.884211	0-20th	NT5E
6	87589975	-	150.635	-0.105095	0.958824	40-60th	RARS2
6	87590128	+	104.056	0.181999	0.95813	40-60th	ORC3
6	87702233	-	232.215	-0.331887	0.954128	40-60th	AKIRIN2
6	96897863	-	151.652	-0.111194	0.953756	40-60th	NDUFAF4
6	96897891	-	361.824	0.51359	0.953589	40-60th	NDUFAF4
6	99425308	-	172.95	-0.0213788	0.960408	40-60th	PNISR
6	106629578	+	157.745	-0.0118629	0.949907	40-60th	QRSL1
6	109382411	-	460.522	-0.149811	0.988735	80-100th	CD164
6	109382467	-	115.902	-0.498885	0.938489	20-40th	CD164
6	110180427	+	188.202	0.040279	0.980565	80-100th	CDC40
6	110958747	+	106.042	-0.0287773	0.978947	80-100th	GTF3C6
6	113857347	+	209.516	-0.266858	0.902097	20-40th	MARCKS
6	113971136	-	137.709	-0.0395339	0.940447	20-40th	HDAC2
6	116279894	-	145.543	-0.526408	0.963093	60-80th	TSPYL1
6	121435646	+	114.199	-0.141801	0.937153	20-40th	GJA1
6	121435647	+	116.757	0.0923724	0.936747	20-40th	GJA1
6	122471807	-	338.562	-0.0564211	0.917323	20-40th	SERINC1
6	122471811	-	174.318	-0.0123426	0.965517	60-80th	SERINC1
6	125919255	+	133.61	-1.00764	0.665803	0-20th	NCOA7
6	127118668	+	118.034	-0.66004	0.984906	80-100th	RSPO3
6	127118671	+	603.398	-0.588224	0.836017	0-20th	RSPO3
6	127343351	-	195.78	-0.111509	0.97786	60-80th	ECHDC1
6	127343358	-	178.226	0.30185	0.962662	40-60th	ECHDC1
6	127343359	-	647.2	0.139031	0.954698	40-60th	ECHDC1
6	131951372	-	252.737	0.329628	0.838462	0-20th	CCN2
6	134174861	-	263.353	-0.96901	0.896446	0-20th	SGK1
6	134174864	-	138.306	-1.38323	0.951957	40-60th	SGK1
6	136289844	-	404.238	0.137265	0.977611	60-80th	BCLAF1
6	136289807	-	158.772	-0.188003	0.980392	80-100th	BCLAF1
6	136289846	-	100.742	-0.171825	0.974413	60-80th	BCLAF1
6	138107419	-	240.302	-0.282328	0.949484	40-60th	PERP
6	142147263	+	190.723	0.0293675	0.965075	60-80th	VTA1
6	142302677	+	305.274	0.531863	0.887814	0-20th	ADGRG6
6	143843367	+	162.379	0.00321031	0.924837	20-40th	LTV1
6	144095563	-	130.848	-0.188328	0.877451	0-20th	SF3B5
6	144095573	-	2069.64	0.306822	0.971883	60-80th	SF3B5
6	144095619	-	173.454	-0.00473763	0.976436	60-80th	SF3B5
6	149864359	-	104.846	-0.004038	0.952381	40-60th	LRP11
6	151240410	+	373.252	-0.811288	0.944444	40-60th	AKAP12
6	152983039	-	298.983	-0.114732	0.884069	0-20th	FBXO5
6	154733416	+	132.516	-0.251041	0.977124	60-80th	SCAF8
6	158168352	+	542.627	-0.176961	0.984923	80-100th	GTF2H5
6	158168363	+	114.817	0.055235	0.972	60-80th	GTF2H5
6	158819339	-	166.407	-0.634409	0.959023	40-60th	EZR
6	158819368	-	151.129	-0.722229	0.921986	20-40th	EZR
6	159693241	-	134.281	-0.23098	0.950722	40-60th	SOD2
6	159789587	-	346.413	-0.393198	0.983714	80-100th	TCP1
6	159789599	-	375.263	-0.266063	0.929054	20-40th	TCP1
6	159789602	-	1782.66	-0.00339441	0.987165	80-100th	TCP1
6	159790468	+	137.064	0.20597	0.952184	40-60th	MRPL18
6	159790488	+	267.064	-0.0629799	0.940789	20-40th	MRPL18
6	159790492	+	162.473	0.0159817	0.926407	20-40th	MRPL18
6	165988052	-	159.348	0.201136	0.9	0-20th	PDE10A
6	170553257	-	146.934	-0.265691	0.955272	40-60th	PSMB1
6	170553263	-	167.226	-0.080258	0.898305	0-20th	PSMB1
6	170553272	-	245.93	0.136649	0.963652	60-80th	PSMB1
6	170553275	-	254.365	-0.332156	0.984588	80-100th	PSMB1
6	170553290	-	409.75	-0.234968	0.972292	60-80th	PSMB1
6	170553294	-	255.515	-0.625563	0.989887	80-100th	PSMB1
6	170553299	-	643.956	0.408236	0.948641	40-60th	PSMB1
6	170584618	-	137.288	0.491953	0.96875	60-80th	PDCD2
7	1138276	-	117.739	-0.366021	0.989796	80-100th	C7orf50
7	1160196	-	127.921	0.433231	0.89823	0-20th	ZFAND2A
7	1459470	-	166.379	-0.359656	0.862745	0-20th	MICALL2
7	1556205	-	114.222	-0.202119	0.952375	40-60th	TMEM184A
7	1570032	-	448.069	-0.315584	0.955798	40-60th	PSMG3
7	2242186	-	106.162	0.0932561	0.980317	80-100th	MRM2
7	2242205	-	120.717	-0.0832781	0.946897	40-60th	MRM2
7	2242226	+	306.544	-0.0394462	0.992	80-100th	NUDT1
7	2354827	+	453.059	0.502273	0.925442	20-40th	EIF3B
7	2354869	+	157	-0.00553473	0.969565	60-80th	EIF3B
7	5530601	-	33344.2	-0.432108	0.937887	20-40th	ACTB
7	6009272	+	153.529	-0.430515	0.963192	60-80th	AIMP2
7	6009274	+	135.304	-0.0438873	0.736304	0-20th	AIMP2
7	6009275	+	238.397	-0.556528	0.851163	0-20th	AIMP2
7	6059175	-	450.245	0.301238	0.95658	40-60th	EIF2AK1
7	6484149	-	124.666	-0.0324948	0.988636	80-100th	KDELR2
7	6484169	-	180.928	-0.169764	0.989583	80-100th	KDELR2
7	6484181	-	105.479	-0.146632	0.967742	60-80th	DAGLB
7	6484190	-	1114.15	-0.219575	0.972142	60-80th	DAGLB
7	6590021	+	127.815	-0.0228199	0.934211	20-40th	INTS15
7	10940130	-	159.517	0.226761	0.935075	20-40th	NDUFA4
7	10940135	-	522.627	0.00328746	0.96217	40-60th	NDUFA4
7	10940158	-	158.619	0.545321	0.952025	40-60th	NDUFA4
7	10940173	-	483.661	0.0338483	0.982136	80-100th	NDUFA4
7	10940177	-	352.168	-0.208428	0.981771	80-100th	NDUFA4
7	10940188	-	215.26	0.201558	0.92586	20-40th	NDUFA4
7	12687042	+	301.802	0.401259	0.951282	40-60th	ARL4A
7	16646181	+	437.495	0.434605	0.944314	40-60th	BZW2
7	16646189	+	381.828	0.17764	0.930669	20-40th	BZW2
7	16804995	-	3362.45	1.285	0.979833	80-100th	AGR2
7	16804999	-	1468.07	1.38428	0.955839	40-60th	AGR2
7	17298652	+	195.94	-0.241789	0.9375	20-40th	AHR
7	22822835	-	147.03	0.11528	0.956897	40-60th	TOMM7
7	23299341	+	107.526	-0.0398402	0.918415	20-40th	MALSU1
7	23531981	-	314.086	-0.171407	0.94709	40-60th	TRA2A
7	25125260	-	852.563	0.200914	0.99142	80-100th	CYCS
7	25125264	-	167.718	-0.207545	0.947748	40-60th	CYCS
7	25125300	-	106.753	-0.145939	0.898305	0-20th	CYCS
7	26200743	-	930.352	-0.271992	0.959408	40-60th	HNRNPA2B1
7	26200746	-	5743.36	-0.357786	0.961386	40-60th	HNRNPA2B1
7	26200773	-	139.193	0.401726	0.95	40-60th	HNRNPA2B1
7	26200775	-	174.476	-0.148014	0.958847	40-60th	HNRNPA2B1
7	26201726	+	221.994	-0.352898	0.950617	40-60th	CBX3
7	26201783	+	126.104	-0.118673	0.954734	40-60th	CBX3
7	30504824	-	112.38	0.0788927	1	80-100th	GGCT
7	30504832	-	138.298	-0.0848549	0.967742	60-80th	GGCT
7	32490380	-	2236.08	0.0977626	0.964873	60-80th	LSM5
7	32490385	-	1848.34	-0.0398872	0.95513	40-60th	LSM5
7	32490394	-	156.209	0.392226	0.923077	20-40th	LSM5
7	32490397	-	214.012	-0.213662	0.987595	80-100th	LSM5
7	32490411	-	132.643	-0.0161808	0.99	80-100th	LSM5
7	35037483	-	113.708	0.665891	0.986486	80-100th	DPY19L1
7	35801219	+	1265.13	-0.182012	0.958649	40-60th	SEPTIN7
7	40134619	-	112.438	0.0603363	0.971852	60-80th	MPLKIP
7	42932377	+	334.509	0.130272	0.984424	80-100th	MRPL32
7	42932384	+	108.466	0.742505	0.776923	0-20th	MRPL32
7	43729483	-	307.856	-0.686943	0.971024	60-80th	COA1
7	43729497	-	297.64	0.164246	0.974954	60-80th	COA1
7	43729510	-	153.909	-0.223712	0.941176	20-40th	COA1
7	43729533	-	115.422	0.104151	0.977778	60-80th	COA1
7	43869498	-	155.042	1.22604	0.928571	20-40th	MRPS24
7	43869521	-	279.672	0.0623165	0.983146	80-100th	MRPS24
7	44044706	+	131.309	0.374113	0.972028	60-80th	DBNL
7	44123548	-	208.925	0.113563	0.95671	40-60th	POLD2
7	44573908	-	645.629	-0.59151	0.959826	40-60th	DDX56
7	44573927	-	464.661	-0.393172	0.96378	60-80th	DDX56
7	44848080	-	183.707	0.0457576	0.974288	60-80th	H2AZ2
7	44848087	-	202.281	0.214317	0.94961	40-60th	H2AZ2
7	45111697	-	152.189	0.0574281	0.957518	40-60th	TBRG4
7	45921272	-	1052.71	-2.69697	0.940436	20-40th	IGFBP3
7	47582603	-	118.939	-0.618674	0.90566	20-40th	TNS3
7	48089227	+	170.374	-0.551297	0.97963	80-100th	UPP1
7	48089265	+	391.088	-0.546199	0.93865	20-40th	UPP1
7	54759192	-	186.149	-0.121695	0.966718	60-80th	SEC61G
7	54759198	-	530.277	-0.319593	0.959115	40-60th	SEC61G
7	54759205	-	357.657	0.492821	0.947225	40-60th	SEC61G
7	54759208	-	176.789	-0.610156	0.982458	80-100th	SEC61G
7	54759211	-	1569.23	-0.343061	0.992172	80-100th	SEC61G
7	54759233	-	644.752	0.020962	0.976607	60-80th	SEC61G
7	54759243	-	114.208	0.141154	0.994106	80-100th	SEC61G
7	55019017	+	248.932	-0.791909	0.945205	40-60th	EGFR
7	55951877	+	202.937	-0.0239385	0.993631	80-100th	MRPS17
7	55951906	+	152.408	0.141315	0.966623	60-80th	MRPS17
7	55951916	+	119.586	-0.160088	0.978961	80-100th	MRPS17
7	56034171	-	118.189	-0.202461	0.969741	60-80th	PSPH
7	56051444	-	261.524	-0.150005	0.945946	40-60th	PSPH
7	56051765	+	643.752	0.0642217	0.979606	80-100th	CCT6A
7	56051812	+	439.047	-0.167229	0.971689	60-80th	CCT6A
7	56051819	+	110.156	-0.418237	0.988439	80-100th	CCT6A
7	56064265	+	221.769	-0.132694	0.960317	40-60th	SUMF2
7	56064305	+	174.322	-0.500328	0.97558	60-80th	SUMF2
7	56106445	-	110.214	-0.163471	0.96371	60-80th	CHCHD2
7	56106465	-	223.147	-0.194439	0.979104	80-100th	CHCHD2
7	56106476	-	4893.87	0.0404092	0.987868	80-100th	CHCHD2
7	56106492	-	1269.73	-0.165666	0.988945	80-100th	CHCHD2
7	66075834	+	108.71	-0.264665	0.989247	80-100th	ASL
7	66995558	-	102.094	-0.386219	0.953957	40-60th	SBDS
7	66995582	-	145.795	-0.273667	0.941818	20-40th	SBDS
7	66995586	-	324.123	-0.32815	0.968411	60-80th	SBDS
7	66995599	-	153.74	-0.18041	0.974843	60-80th	SBDS
7	72879357	+	116.425	-0.40421	0.952026	40-60th	POM121
7	73308816	-	111.987	-0.192561	0.946154	40-60th	NSUN5
7	73578576	-	188.96	-0.192268	0.980397	80-100th	TBL2
7	73578579	-	341.221	-0.337032	0.978198	60-80th	TBL2
7	73683431	-	161.121	0.421407	0.975487	60-80th	DNAJC30
7	73683597	+	406.132	-0.244982	0.968587	60-80th	BUD23
7	74174353	+	216.785	0.0936091	0.980769	80-100th	EIF4H
7	75486299	-	119.631	-0.127283	0.958448	40-60th	POM121C
7	75915157	+	438.622	-0.320143	0.977776	60-80th	POR
7	76048051	+	723.154	0.131546	0.988393	80-100th	MDH2
7	76048067	+	414.522	-0.0376028	0.982678	80-100th	MDH2
7	76048069	+	151.673	-0.525422	0.983193	80-100th	MDH2
7	76048085	+	467.685	0.195871	0.975987	60-80th	MDH2
7	76048106	+	279.235	-0.206477	0.962464	40-60th	MDH2
7	76048136	+	105.856	-0.261245	0.983682	80-100th	MDH2
7	76302579	+	175.507	0.727016	0.949192	40-60th	HSPB1
7	76302588	+	155.545	0.14211	0.92054	20-40th	HSPB1
7	76302623	+	417.057	0.220793	0.957879	40-60th	HSPB1
7	76302675	+	4630.8	-0.333546	0.938949	20-40th	HSPB1
7	76358989	-	962.982	-0.217496	0.986577	80-100th	YWHAG
7	80919051	-	167.659	0.391924	0.849462	0-20th	SEMA3C
7	80919055	-	115.393	0.466855	0.862903	0-20th	SEMA3C
7	80919062	-	156.389	0.217063	0.932432	20-40th	SEMA3C
7	87152453	+	205.275	-0.157029	0.953225	40-60th	DMTF1
7	88220036	-	326.815	0.237226	0.976125	60-80th	SRI
7	90346715	+	115.674	0.0817833	0.935607	20-40th	GTPBP10
7	92134471	-	114.039	-0.213562	0.955056	40-60th	CYP51A1
7	92134474	-	158.502	-0.320679	0.951111	40-60th	CYP51A1
7	93890753	-	879.938	0.160856	0.929823	20-40th	TFPI2
7	93921805	+	230.73	-0.800657	0.967422	60-80th	GNG11
7	93921808	+	132.658	-0.312726	0.936842	20-40th	GNG11
7	94004355	-	174.464	0.125685	0.937055	20-40th	BET1
7	94004362	-	135.664	0.1746	0.978112	60-80th	BET1
7	94656370	+	183.579	-2.40324	0.78484	0-20th	PEG10
7	95434987	-	165.601	0.122553	0.968	60-80th	PON2
7	95435002	-	222.497	0.310795	0.928571	20-40th	PON2
7	95435017	-	125.74	0.475082	0.949239	40-60th	PON2
7	95435028	-	215.152	-0.671031	0.991228	80-100th	PON2
7	96709846	-	532.135	0.18091	0.956774	40-60th	SEM1
7	96709861	-	133.249	-0.369037	0.973475	60-80th	SEM1
7	96709867	-	115.114	0.340517	0.985423	80-100th	SEM1
7	96709880	-	112.376	-0.321799	0.964997	60-80th	SEM1
7	97872408	-	491.789	0.27052	0.980528	80-100th	ASNS
7	99374696	+	271.599	0.625084	0.990135	80-100th	ARPC1B
7	99374730	+	1222.3	0.177408	0.981135	80-100th	ARPC1B
7	99466155	-	860.396	-0.290931	0.99273	80-100th	ATP5MF
7	99466157	-	223.926	0.0919562	0.975295	60-80th	ATP5MF
7	99466152	-	257.807	0.0424731	0.959684	40-60th	ATP5MF
7	99466162	-	443.371	-0.205869	0.969927	60-80th	ATP5MF-PTCD1
7	99466164	-	3679.57	-0.23314	0.971953	60-80th	ATP5MF-PTCD1
7	99558642	+	177.644	-0.143392	0.957143	40-60th	ZNF655
7	100101379	-	465.383	0.0611335	0.956204	40-60th	MCM7
7	100101397	-	375.229	0.422197	0.968129	60-80th	MCM7
7	100101409	-	121.486	-0.165598	0.972	60-80th	MCM7
7	100119348	-	127.55	0.395209	0.923077	20-40th	TAF6
7	100148905	+	191.195	-0.0598817	0.98615	80-100th	LAMTOR4
7	100148937	+	106.676	-0.350347	0.984076	80-100th	LAMTOR4
7	100148957	+	409.509	-0.450292	0.997636	80-100th	LAMTOR4
7	100148960	+	129.801	-0.217351	0.96088	40-60th	LAMTOR4
7	100429447	+	508.615	-0.468846	0.958929	40-60th	MEPCE
7	100867387	+	202.593	0.125053	0.516922	0-20th	TRIP6
7	100875105	+	100.058	-0.351397	0.977901	60-80th	SRRT
7	101127104	+	5687.94	-0.990385	0.60768	0-20th	SERPINE1
7	101127106	+	287.564	-0.650496	0.65721	0-20th	SERPINE1
7	101154474	+	100.26	0.0748459	0.895238	0-20th	AP1S1
7	101218165	+	232.479	0.523317	0.993403	80-100th	ZNHIT1
7	101218168	+	126.994	-0.0730104	0.981954	80-100th	ZNHIT1
7	101218181	+	226.833	0.197473	0.983166	80-100th	ZNHIT1
7	101245085	-	175.642	0.112339	0.973134	60-80th	FIS1
7	101816008	+	169.661	-0.180361	0.952973	40-60th	CUX1
7	102363883	+	124.689	-0.0775295	0.973547	60-80th	PRKRIP1
7	102478922	-	160.578	-0.229544	0.985359	80-100th	POLR2J
7	103297435	+	100.48	0.181558	0.994426	80-100th	PMPCB
7	103347643	+	400.643	0.0315664	0.96257	40-60th	PSMC2
7	103347644	+	277.168	0.194042	0.966662	60-80th	PSMC2
7	105522242	-	277.337	-0.549011	0.97931	80-100th	PUS7
7	105532210	+	212.646	0.13922	0.975419	60-80th	RINT1
7	106284951	-	1222.03	-0.33308	0.937508	20-40th	NAMPT
7	107169003	+	135.75	-0.199392	0.962965	60-80th	HBP1
7	107563906	-	101.736	-0.0119459	0.956044	40-60th	COG5
7	107563917	-	119.744	-0.116404	1	80-100th	COG5
7	107744142	+	513.376	0.0879143	0.917058	20-40th	CBLL1
7	113118554	-	513.041	0.302194	0.953263	40-60th	SMIM30
7	116525001	+	580.376	-0.25708	0.941818	20-40th	CAV1
7	116525010	+	213.408	-0.126125	0.953202	40-60th	CAV1
7	116525036	+	870.021	-0.671128	0.945052	40-60th	CAV1
7	116525038	+	213.394	-0.699056	0.944717	40-60th	CAV1
7	116862603	+	107.303	0.263602	0.975806	60-80th	CAPZA2
7	118184132	+	149.304	-0.180989	0.972414	60-80th	LSM8
7	118184169	+	287.163	-0.607831	0.966513	60-80th	LSM8
7	123557815	-	125.325	0.528064	0.979543	80-100th	NDUFA5
7	123557830	-	100.421	0.129197	0.970975	60-80th	NDUFA5
7	127652148	+	321.571	-0.0827523	0.981818	80-100th	SND1
7	127652165	+	755.151	-0.188148	0.99164	80-100th	SND1
7	128343908	-	168.434	-0.443244	0.948072	40-60th	RBM28
7	128739372	+	131.26	-0.364376	0.967118	60-80th	CALU
7	128862861	+	192.82	0.366644	0.974608	60-80th	ATP6V1F
7	128862879	+	102.032	-0.565315	0.885246	0-20th	ATP6V1F
7	129055111	-	239.717	-0.175471	0.971522	60-80th	TNPO3
7	130486333	+	231.622	0.442945	0.979063	80-100th	MEST
7	133082090	-	141.092	-0.0320447	1	80-100th	CHCHD3
7	134459098	-	5629.17	-0.0298631	0.960616	40-60th	AKR1B1
7	134459125	-	812.81	-0.0719282	0.981469	80-100th	AKR1B1
7	134459136	-	117.413	-0.173479	0.964143	60-80th	AKR1B1
7	134527477	+	105.864	-0.320675	0.912948	20-40th	AKR1B10
7	134527509	+	154.678	-0.305943	0.80916	0-20th	AKR1B10
7	134527549	+	122.717	-0.763662	0.932467	20-40th	AKR1B10
7	134527690	+	104.216	-1.07297	0.696059	0-20th	AKR1B10
7	135557917	+	225.585	-0.0313042	0.979743	80-100th	NUP205
7	135557931	+	484.028	0.148489	0.924106	20-40th	NUP205
7	135662504	+	109.266	-0.48848	1	80-100th	STMP1
7	135662514	+	217.36	-0.365763	0.990667	80-100th	STMP1
7	135977351	-	155.561	-1.61533	0.970522	60-80th	MTPN
7	135977353	-	582.397	0.164845	0.958982	40-60th	MTPN
7	135977358	-	169.995	0.210971	0.950063	40-60th	MTPN
7	135977359	-	171.553	0.0766434	0.94803	40-60th	MTPN
7	141551410	+	182.978	-0.244665	0.980741	80-100th	AGK
7	141738372	+	440.979	-0.0771056	0.976779	60-80th	SSBP1
7	143263472	+	103.287	-0.445169	0.86087	0-20th	GSTK1
7	148698903	+	106.321	-0.316859	0.969811	60-80th	CUL1
7	150368822	+	166.492	0.176439	0.940938	20-40th	REPIN1
7	151028450	+	197.703	-0.348147	0.982824	80-100th	ABCB8
7	151028452	+	147.532	-0.445705	0.988235	80-100th	ABCB8
7	151227184	-	155.621	-0.364852	0.930295	20-40th	ABCF2-H2BK1
7	151227205	-	179.414	0.536685	0.948691	40-60th	ABCF2
7	151341812	+	144.9	-0.331533	0.961538	40-60th	NUB1
7	152676141	-	128.184	-0.31332	0.935529	20-40th	XRCC2
7	156893179	-	241.815	-0.0120093	0.988629	80-100th	LMBR1
7	156893183	-	244.176	0.0604922	0.98356	80-100th	LMBR1
7	157138949	+	213.701	-0.217001	0.976077	60-80th	UBE3C
8	9555914	+	106.804	0.157748	0.964791	60-80th	TNKS
8	11802746	+	101.167	0.343338	0.985507	80-100th	FDFT1
8	11802750	+	121.38	-0.460149	0.9375	20-40th	FDFT1
8	11868114	-	406.429	0.0852378	0.441558	0-20th	CTSB
8	11868118	-	234.782	-0.153246	0.969163	60-80th	CTSB
8	15417191	+	182.122	2.76393	0.986773	80-100th	TUSC3
8	17246852	-	319.487	-0.0514423	0.948454	40-60th	CNOT7
8	17246859	-	394.555	-0.119838	0.960606	40-60th	CNOT7
8	17246862	-	274.832	-0.27368	0.982143	80-100th	CNOT7
8	17246878	-	120.335	-0.397186	1	80-100th	CNOT7
8	19757908	-	222.754	-0.670824	0.918549	20-40th	CSGALNACT1
8	22131010	-	210.352	-0.707126	0.94186	20-40th	HRURF
8	22141907	-	422.821	0.127106	0.970322	60-80th	REEP4
8	22141886	-	113.353	0.141943	0.966437	60-80th	REEP4
8	23069031	-	186.404	0.161079	0.972851	60-80th	TNFRSF10B
8	23164027	-	697.489	-0.0164069	0.898163	0-20th	TNFRSF10D
8	23225099	-	339.391	-0.0836917	0.942333	20-40th	TNFRSF10A
8	23854806	-	112.568	-0.458017	0.883212	0-20th	STC1
8	25458272	-	193.195	-0.664514	0.945652	40-60th	KCTD9
8	26513872	-	161.182	-0.619745	0.979381	80-100th	PNMA2
8	27614702	-	2289.68	0.389112	0.954111	40-60th	CLU
8	27614703	-	657.344	0.625861	0.972477	60-80th	CLU
8	27837816	-	105.379	-0.667608	0.950173	40-60th	PBK
8	29350673	-	146.639	-0.480315	0.745763	0-20th	DUSP4
8	30095410	+	165.122	0.124833	0.960652	40-60th	LEPROTL1
8	30156369	+	139.978	0.0591293	0.922486	20-40th	DCTN6
8	30384541	+	216.042	-1.03643	0.961538	40-60th	RBPMS
8	30727835	-	199.265	0.318044	0.862069	0-20th	GSR
8	30727847	-	195.882	-0.022466	0.949664	40-60th	GSR
8	30727859	-	112.136	0.458853	0.923664	20-40th	GSR
8	32548311	+	460.458	0.475561	0.918828	20-40th	NRG1
8	32548312	+	138.819	0.486496	0.904762	20-40th	NRG1
8	32548313	+	234.952	0.168785	0.89674	0-20th	NRG1
8	33485182	+	153.241	-0.0535439	0.946797	40-60th	MAK16
8	38030545	+	123.292	-0.509956	0.960396	40-60th	EIF4EBP1
8	38468633	-	153.119	-0.778584	0.82963	0-20th	FGFR1
8	38996817	+	114.984	0.250169	0.969021	60-80th	ADAM9
8	40153482	+	2278.65	0.282489	0.693384	0-20th	TCIM
8	40153484	+	246.758	-0.173653	0.809798	0-20th	TCIM
8	42051987	-	327.18	0.0355476	0.949889	40-60th	KAT6A
8	47960136	-	433.075	-0.282462	0.973607	60-80th	PRKDC
8	47960142	-	104.17	-0.826204	1	80-100th	PRKDC
8	47960151	-	426.769	-0.347868	0.926829	20-40th	PRKDC
8	47960957	+	675.195	-0.497542	0.988753	80-100th	MCM4
8	47960964	+	238.542	-0.495115	0.95808	40-60th	MCM4
8	53843270	-	147.961	0.319771	0.975642	60-80th	ATP6V1H
8	54022371	-	111.889	-0.230167	0.939341	20-40th	TCEA1
8	54022427	-	365.934	-0.344293	0.978873	60-80th	TCEA1
8	54101901	-	153.026	0.201433	0.990566	80-100th	LYPLA1
8	54135230	+	191.885	0.393362	0.94161	20-40th	MRPL15
8	58553248	+	103.805	0.334491	0.987933	80-100th	SDCBP
8	58553261	+	319.197	0.496456	0.955071	40-60th	SDCBP
8	60281395	-	146.188	-0.680443	0.958974	40-60th	CA8
8	60516987	+	237.655	-0.318718	0.964322	60-80th	RAB2A
8	61714586	-	168.987	0.404552	0.807143	0-20th	ASPH
8	61714506	-	1465.54	-0.122963	0.553846	0-20th	ASPH
8	61714530	-	400.812	-0.0165099	0.867458	0-20th	ASPH
8	61714540	-	110.626	-0.296972	0.866667	0-20th	ASPH
8	61714549	-	579.059	-0.0962417	0.901226	20-40th	ASPH
8	61714578	-	220.144	-0.166628	0.87931	0-20th	ASPH
8	61714588	-	1585.46	0.173812	0.883892	0-20th	ASPH
8	61714592	-	786.286	-0.0355418	0.892079	0-20th	ASPH
8	63038768	-	120.833	0.494826	0.844156	0-20th	GGH
8	63038804	-	140.87	-0.315724	0.996448	80-100th	GGH
8	65634177	-	199.09	-0.577406	0.983523	80-100th	ARMC1
8	66429030	+	315.948	0.280946	0.924342	20-40th	RRS1
8	66429038	+	128.4	0.0382595	0.972983	60-80th	RRS1
8	67062133	-	330.708	-0.142946	0.983481	80-100th	COPS5
8	70608243	-	123.464	0.144663	0.966292	60-80th	TRAM1
8	70669160	-	149.736	0.0259736	0.952703	40-60th	LACTB2
8	73008864	+	153.06	-0.176525	0.974599	60-80th	TERF1
8	73008867	+	132.674	-0.114359	0.974576	60-80th	TERF1
8	73293638	-	512.797	-0.216976	0.984127	80-100th	RPL7
8	73294602	+	122.716	-0.171804	0.790323	0-20th	RDH10
8	73746840	-	125.219	0.0921932	0.961575	40-60th	STAU2
8	73972267	-	250.875	-0.501633	0.960496	40-60th	ELOC
8	73972286	-	860.443	-0.285974	0.982143	80-100th	ELOC
8	73976195	+	530.461	0.121982	0.95902	40-60th	TMEM70
8	73976206	+	124.638	0.0401794	0.956041	40-60th	TMEM70
8	77000078	-	113.138	-0.0240195	0.938242	20-40th	PEX2
8	80030257	-	267.921	0.395076	0.783271	0-20th	MRPS28
8	81280536	+	2894.76	0.175376	0.929688	20-40th	FABP5
8	81686325	-	182.435	-0.151585	0.976526	60-80th	IMPA1
8	85220356	-	185.832	-0.310005	0.983638	80-100th	RBIS
8	85220372	-	295.525	0.242539	0.978791	60-80th	RBIS
8	85220379	-	113.259	-0.48015	0.972304	60-80th	RBIS
8	96235552	-	134.394	0.503906	0.981492	80-100th	UQCRB
8	96235556	-	235.771	0.18992	0.977515	60-80th	UQCRB
8	96235557	-	255.236	0.390954	0.954208	40-60th	UQCRB
8	96235559	-	834.115	0.237581	0.988308	80-100th	UQCRB
8	96235563	-	133.559	-0.0809555	0.989362	80-100th	UQCRB
8	96261931	+	609.257	0.259583	0.982036	80-100th	PTDSS1
8	97644184	+	220.316	0.0838121	0.923469	20-40th	MTDH
8	98045526	-	435.673	-0.240933	0.989387	80-100th	RPL30
8	98045590	-	247.937	0.193355	0.957558	40-60th	RPL30
8	99893663	-	462.026	-0.234497	0.978542	60-80th	COX6C
8	99893659	-	132.034	0.0428046	0.934219	20-40th	COX6C
8	99893681	-	5842.97	0.197655	0.97073	60-80th	COX6C
8	99893684	-	1090.74	-0.0991635	0.989833	80-100th	COX6C
8	99893686	-	539.195	0.380815	0.965264	60-80th	COX6C
8	99893707	-	3146.53	0.371427	0.974363	60-80th	COX6C
8	99893713	-	172.654	0.087439	0.979006	80-100th	COX6C
8	100150638	+	247.644	0.0695145	0.96255	40-60th	POLR2K
8	100951978	-	631.07	0.0853824	0.974774	60-80th	YWHAZ
8	100952019	-	133.116	-0.527448	0.955049	40-60th	YWHAZ
8	100952044	-	616.277	-0.182728	0.945701	40-60th	YWHAZ
8	102655723	-	314.518	-0.948882	0.884642	0-20th	KLF10
8	102864163	-	604.55	-0.365979	0.96252	40-60th	AZIN1
8	103415401	+	232.168	0.0464465	0.947368	40-60th	DCAF13
8	108248724	-	689.178	-0.0342618	0.982639	80-100th	EIF3E
8	108248726	-	505.622	0.155451	0.9776	60-80th	EIF3E
8	108248729	-	220.219	-0.0577339	0.983989	80-100th	EIF3E
8	108248733	-	431.778	0.267504	0.96858	60-80th	EIF3E
8	109334087	-	171.05	-0.569547	0.947035	40-60th	NUDCD1
8	109334121	-	150.323	0.0853213	0.96415	60-80th	NUDCD1
8	109334326	+	119.082	0.271452	0.962775	40-60th	ENY2
8	109334339	+	131.511	-0.1633	0.979532	80-100th	ENY2
8	109334368	+	192.081	-0.315117	0.963413	60-80th	ENY2
8	109334379	+	402.638	-0.324106	0.974023	60-80th	ENY2
8	109540184	+	101.841	0.0195838	0.959276	40-60th	EBAG9
8	116755801	-	237.401	0.26805	0.961039	40-60th	EIF3H
8	116874776	-	185.067	-0.160505	0.956923	40-60th	RAD21
8	119832834	-	136.908	0.184954	0.923988	20-40th	TAF2
8	119832841	-	208.323	0.0880107	0.972086	60-80th	TAF2
8	120445129	-	144.604	0.170962	0.920597	20-40th	MRPL13
8	123042302	-	253.945	0.0628479	0.988932	80-100th	DERL1
8	123768439	+	112.884	0.116868	0.963134	60-80th	FAM91A1
8	124539084	-	783.276	0.512427	0.976448	60-80th	TATDN1
8	124539136	+	127.073	-0.254459	0.968675	60-80th	NDUFB9
8	124539144	+	226.063	-0.0344472	0.981303	80-100th	NDUFB9
8	124539172	+	127.171	-0.0260886	0.967552	60-80th	NDUFB9
8	124539173	+	166.807	-0.167059	0.977974	60-80th	NDUFB9
8	124539178	+	1224.78	0.233581	0.790496	0-20th	NDUFB9
8	125430360	+	143.513	0.761523	0.932432	20-40th	TRIB1
8	127736231	+	544.093	0.113967	0.563218	0-20th	MYC
8	133297252	-	839.723	-0.487077	0.975494	60-80th	NDRG1
8	141001229	-	116.019	-0.349951	0.982533	80-100th	PTK2
8	143829334	-	163.046	-0.1789	0.940299	20-40th	PUF60
8	143950917	-	141.777	-0.95161	0.934066	20-40th	PLEC
8	143953834	-	291.642	-0.733422	0.948936	40-60th	PLEC
8	143990056	+	464.752	0.144441	0.983333	80-100th	GRINA
8	144137774	+	166.219	-0.511139	0.965909	60-80th	HGH1
8	144326852	-	272.583	0.0668624	0.964092	60-80th	DGAT1
8	144358581	+	153.353	-0.227099	0.977654	60-80th	SLC52A2
8	144428513	-	129.741	-0.30024	0.991803	80-100th	VPS28
8	144444441	-	111.105	-0.121181	0.981132	80-100th	TONSL
8	144792367	-	135.303	0.0289991	0.960869	40-60th	RPL8
8	144792358	-	302.581	-0.5669	0.99273	80-100th	RPL8
8	144792363	-	198.76	-0.492424	0.969512	60-80th	RPL8
8	144792416	-	240.324	0.502879	0.946701	40-60th	RPL8
9	4741202	-	187.975	-0.447376	0.975	60-80th	AK3
9	4741227	-	205.979	0.234937	0.951456	40-60th	AK3
9	5231419	+	510.791	0.455963	0.94105	20-40th	INSL4
9	5231431	+	124.209	0.315993	0.98722	80-100th	INSL4
9	5629109	+	104.135	0.201548	0.990566	80-100th	RIC1
9	6015624	-	119.277	-0.235393	0.972532	60-80th	RANBP6
9	6413205	+	138.26	-0.047392	0.913043	20-40th	UHRF2
9	7799768	-	175.303	-0.0238053	0.82381	0-20th	DMAC1
9	7799778	-	757.867	-0.325589	0.973226	60-80th	DMAC1
9	15510962	-	125.518	-0.531846	0.966942	60-80th	PSIP1
9	15510970	-	916.454	-0.2651	0.99162	80-100th	PSIP1
9	19049418	+	258.674	-0.316313	0.95355	40-60th	RRAGA
9	19102914	-	135.503	-0.316521	0.855556	0-20th	HAUS6
9	19380207	-	975.138	-0.193849	0.989144	80-100th	RPS6
9	19380215	-	111.677	-0.523865	0.924731	20-40th	RPS6
9	19380251	-	117.826	0.353442	0.968364	60-80th	RPS6
9	21802642	+	283.472	-0.169046	0.878049	0-20th	MTAP
9	21802649	+	253.948	0.170188	0.942623	40-60th	MTAP
9	21802659	+	280.979	0.205133	0.938865	20-40th	MTAP
9	21802671	+	163.791	-0.0488777	0.577465	0-20th	MTAP
9	32384651	+	146.503	-0.362049	0.996575	80-100th	ACO1
9	32573117	-	130.647	-0.0817482	0.965824	60-80th	NDUFB6
9	32573121	-	161.216	0.0780911	0.968392	60-80th	NDUFB6
9	32573138	-	320.517	-0.0194245	0.976034	60-80th	NDUFB6
9	32573179	-	197.628	0.0351552	0.964912	60-80th	NDUFB6
9	32573182	-	185.735	0.312134	0.980219	80-100th	NDUFB6
9	33025285	+	165.373	0.151946	0.938406	20-40th	DNAJA1
9	33264708	-	122.665	0.225398	0.983847	80-100th	BAG1
9	33265049	+	215.061	0.17008	0.954072	40-60th	CHMP5
9	33473920	-	179.671	0.498007	0.965786	60-80th	NOL6
9	33473924	-	111.1	0.132505	0.991843	80-100th	NOL6
9	33750679	+	114.464	2.67084	0.962175	40-60th	PRSS3
9	34612097	-	161.238	0.222802	0.982964	80-100th	RPP25L
9	34637753	-	133.642	0.493228	0.938776	20-40th	SIGMAR1
9	35072568	-	278.935	-0.340698	0.966608	60-80th	VCP
9	35072619	-	364.058	-0.832861	0.98895	80-100th	VCP
9	35072625	-	3830.38	-0.481711	0.959697	40-60th	VCP
9	35096580	-	530.577	-0.321129	0.972203	60-80th	PIGO
9	35689925	-	1184.12	-0.764649	0.97404	60-80th	TPM2
9	36190963	+	425.767	-0.0141429	0.926883	20-40th	CLTA
9	36572895	+	344.464	-0.169278	0.970034	60-80th	MELK
9	36572897	+	258.609	-0.287386	0.978201	60-80th	MELK
9	37422696	+	359.443	0.0532019	0.964775	60-80th	GRHPR
9	37422698	+	217.784	0.020822	0.970443	60-80th	GRHPR
9	37592582	-	302.492	-0.160954	0.96884	60-80th	TOMM5
9	37592609	-	191.985	0.483878	0.92093	20-40th	TOMM5
9	37592611	-	143.563	0.0579061	0.959123	40-60th	TOMM5
9	37785068	-	222.78	0.00449217	0.972759	60-80th	EXOSC3
9	37904127	-	132.47	-0.231915	0.987952	80-100th	SLC25A51
9	71768513	-	128.519	-0.0617159	0.909282	20-40th	CEMIP2
9	71911193	-	155.553	-0.349418	0.947162	40-60th	ABHD17B
9	72365205	-	1194.39	0.285148	0.933545	20-40th	ZFAND5
9	72952980	-	158.89	-0.467624	0.730771	0-20th	ALDH1A1
9	72953004	-	151.178	-0.370803	0.852275	0-20th	ALDH1A1
9	72953027	-	311.605	-0.277976	0.6809	0-20th	ALDH1A1
9	72953031	-	201.033	-0.202476	0.72555	0-20th	ALDH1A1
9	72953042	-	243.732	-0.0841319	0.74484	0-20th	ALDH1A1
9	72953043	-	111.884	0.457128	0.493488	0-20th	ALDH1A1
9	72953044	-	3314.21	-0.0168805	0.790438	0-20th	ALDH1A1
9	72953050	-	1260.33	0.0944407	0.839481	0-20th	ALDH1A1
9	72953053	-	48908.5	-0.151525	0.984899	80-100th	ALDH1A1
9	73151865	+	19416.6	0.237582	0.826428	0-20th	ANXA1
9	78297127	+	2196.29	-0.0453795	0.986401	80-100th	PSAT1
9	78297129	+	174.537	-0.0960865	0.962025	40-60th	PSAT1
9	78297147	+	360.59	0.299761	0.938596	20-40th	PSAT1
9	78297156	+	502.817	-0.173147	0.969543	60-80th	PSAT1
9	83980204	-	117.611	0.00314998	0.962264	40-60th	HNRNPK
9	83980579	-	147.408	-0.170736	0.978028	60-80th	HNRNPK
9	83980594	-	124.561	-0.819369	0.890244	0-20th	HNRNPK
9	83980604	-	123.623	0.0396387	0.742857	0-20th	HNRNPK
9	83980612	-	580.036	0.204868	0.660422	0-20th	HNRNPK
9	83980614	-	226.133	-0.675232	0.534884	0-20th	HNRNPK
9	86100143	-	141.881	-0.0986168	0.944291	40-60th	GOLM1
9	86100149	-	292.466	-0.0659551	0.981926	80-100th	GOLM1
9	86282538	-	400.464	0.203479	0.951456	40-60th	ISCA1
9	86282575	-	111.634	-0.279033	0.990385	80-100th	ISCA1
9	87726119	+	7677.22	-0.250143	0.950619	40-60th	CTSL
9	87726121	+	265.066	-0.111213	0.891566	0-20th	CTSL
9	89311198	+	10593.5	-0.182257	0.948959	40-60th	CKS2
9	92293683	-	130.83	-0.291132	0.988435	80-100th	IARS1
9	92293706	-	543.263	-0.326535	0.991909	80-100th	IARS1
9	92293716	-	347.727	-0.0897638	0.986996	80-100th	IARS1
9	94374531	+	121.664	-0.159931	0.943262	40-60th	MFSD14B
9	94374541	+	299.364	-0.173893	0.974545	60-80th	MFSD14B
9	97633759	+	120.798	-0.227269	0.969231	60-80th	NCBP1
9	97633821	+	136.61	-0.148832	0.985075	80-100th	NCBP1
9	97983352	+	157.729	-0.0996154	0.944036	40-60th	ANP32B
9	99221940	-	120.138	0.588028	0.98731	80-100th	ALG2
9	99222282	+	403.36	0.13293	0.97588	60-80th	SEC61B
9	101398599	-	250.956	0.298839	0.947074	40-60th	MRPL50
9	101398614	-	405.603	-0.0575838	0.979288	80-100th	MRPL50
9	107283269	+	846.544	-0.222509	0.945568	40-60th	RAD23B
9	107283284	+	683.217	0.165848	0.91519	20-40th	RAD23B
9	109119950	-	115.717	0.198503	0.874233	0-20th	TMEM245
9	110256452	-	244.24	-0.548964	0.950673	40-60th	TXN
9	110256481	-	297.347	0.0910895	0.778959	0-20th	TXN
9	110256505	-	401.296	-0.981028	0.857577	0-20th	TXN
9	110256506	-	8005	0.182076	0.860111	0-20th	TXN
9	110256521	-	116.541	0.588333	0.897019	0-20th	TXN
9	110256534	-	198.59	0.627548	0.84375	0-20th	TXN
9	110256536	-	640.173	-0.0303814	0.965882	60-80th	TXN
9	110256541	-	194.407	0.037954	0.952632	40-60th	TXN
9	110256559	-	141.255	0.755647	0.48913	0-20th	TXN
9	110256561	-	1183.03	0.372361	0.921015	20-40th	TXN
9	111599645	-	1199.69	0.17042	0.962325	40-60th	PTGR1
9	111661605	+	300.262	-0.0532401	1	80-100th	GNG10
9	111661615	+	206.011	-0.347407	0.980132	80-100th	GNG10
9	112333584	-	117.791	0.0544776	0.87513	0-20th	PTBP3
9	112333619	-	132.681	0.240438	0.954545	40-60th	PTBP3
9	113410374	-	200.378	-0.172672	0.97582	60-80th	POLE3
9	114587774	+	226.134	-0.380292	0.993127	80-100th	ATP6V1G1
9	114587783	+	110.257	0.29357	0.727829	0-20th	ATP6V1G1
9	114587804	+	155.9	0.144538	0.926471	20-40th	ATP6V1G1
9	121050275	-	117.302	-0.0819144	0.968498	60-80th	C5
9	121201869	-	365.915	-0.253067	0.969773	60-80th	RAB14
9	121268168	+	121.296	-0.0556113	1	80-100th	GSN
9	121370248	-	207.511	-0.113789	0.871325	0-20th	STOM
9	122159779	-	174.068	0.119835	0.98	80-100th	NDUFA8
9	122913313	-	123.449	-0.714706	0.95645	40-60th	ZBTB6
9	124415442	-	1046.13	0.50262	0.982487	80-100th	PSMB7
9	124415443	-	123.93	0.546325	0.98866	80-100th	PSMB7
9	124861962	-	1255.97	-0.176524	0.983275	80-100th	RPL35
9	124861985	-	225.453	-0.0385369	0.96161	40-60th	RPL35
9	124861988	-	741.253	-0.0423875	0.93306	20-40th	RPL35
9	125200544	+	126.848	0.0422798	0.95045	40-60th	RABEPK
9	125200548	+	330.492	0.482866	0.986486	80-100th	RABEPK
9	127980533	-	285.983	0.707559	0.933086	20-40th	EEIG1
9	127980989	-	388.697	0.171778	0.949367	40-60th	EEIG1
9	128203379	+	180.459	-0.198745	0.972615	60-80th	DNM1
9	128276276	+	219.354	-0.0615921	0.975936	60-80th	SWI5
9	128276293	+	141.368	-0.319766	0.988701	80-100th	SWI5
9	128322447	-	439.414	0.235264	0.977977	60-80th	TRUB2
9	128322836	+	109.757	-0.620165	0.987179	80-100th	COQ4
9	128371353	+	102.29	-0.440463	0.961905	40-60th	URM1
9	128456152	+	106.872	-0.318616	0.991416	80-100th	ODF2
9	128504719	+	210.616	0.101311	0.988916	80-100th	GLE1
9	128552590	+	1935.53	-0.018513	0.979094	80-100th	SPTAN1
9	128683830	+	677.449	0.24271	0.953285	40-60th	SET
9	128689262	+	225.138	-0.206168	0.96134	40-60th	SET
9	128689271	+	105.339	-0.108204	0.951872	40-60th	SET
9	128818500	+	246.879	-0.511617	0.893939	0-20th	ENDOG
9	129111388	+	102.329	0.0568545	0.960293	40-60th	PTPA
9	129111415	+	410.048	-0.23472	0.96887	60-80th	PTPA
9	129178257	-	2830.06	0.140189	0.898923	0-20th	IER5L
9	129178261	-	1989.59	0.15808	0.937364	20-40th	IER5L
9	129626157	+	158.573	0.311414	0.971193	60-80th	NTMT1
9	129626163	+	170.569	0.237132	0.981818	80-100th	NTMT1
9	129753034	-	165.573	-0.600805	0.971049	60-80th	PTGES
9	129753042	-	198.078	-0.660023	0.9801	80-100th	PTGES
9	129753067	-	148.032	-0.815996	0.98125	80-100th	PTGES
9	129824112	-	100.565	-0.00281224	0.986207	80-100th	TOR1A
9	129824134	-	174.863	-0.0994928	0.963504	60-80th	TOR1A
9	129835275	-	283.116	-0.0778148	0.996933	80-100th	C9orf78
9	130693775	+	102.364	-0.285606	0.95368	40-60th	EXOSC2
9	130693780	+	812.336	0.0390484	0.923777	20-40th	EXOSC2
9	132079867	-	119.78	-0.115596	0.966372	60-80th	MED27
9	133031000	+	141.646	0.38661	0.9801	80-100th	GTF3C5
9	133348205	+	138.621	0.217392	0.910569	20-40th	RPL7A
9	133376060	-	344.898	0.0982822	0.963493	60-80th	SURF4
9	133992324	-	181.714	-0.200997	0.977273	60-80th	VAV2
9	135500683	+	190.61	0.271199	0.974687	60-80th	MRPS2
9	136245812	-	136.924	0.216125	0.950459	40-60th	QSOX2
9	136410585	-	107.647	-0.0359093	0.938596	20-40th	ENTR1
9	136791344	+	238.605	-0.342749	0.992	80-100th	TMEM141
9	136807947	+	107.734	0.917149	0.956298	40-60th	RABL6
9	136849409	+	191.923	-0.123696	0.974684	60-80th	PHPT1
9	136866281	-	145.847	0.355917	0.960784	40-60th	EDF1
9	136866301	-	1314.68	-0.303263	0.983777	80-100th	EDF1
9	136866304	-	728.572	-0.310419	0.984727	80-100th	EDF1
9	136866312	-	439.048	-0.130732	0.988562	80-100th	EDF1
9	136886516	+	283.764	-0.288821	0.968428	60-80th	TRAF2
9	137188676	+	162.71	-0.302429	0.937716	20-40th	SSNA1
9	137241287	+	2541.78	-0.014311	0.993841	80-100th	TUBB4B
9	137241290	+	643.568	0.145766	0.959124	40-60th	TUBB4B
10	931704	-	101.228	0.119433	0.960286	40-60th	LARP4B
10	988437	+	348.515	-0.532068	0.949318	40-60th	GTPBP4
10	988446	+	100.182	0.132417	0.908384	20-40th	GTPBP4
[truncated: 2,492 more rows]

## Sheet: A549_Initiation_motif
Chr	Position (hg38, 1-based)	Strand	baseMean	log2FoldChange	m6Am level (A549)	Gene	INR
1	1020120	+	133.676	-0.30434	0.980843	AGRN	BBCABW		Student's t-test
1	1231972	-	123.797	0.856382	0.802469	SDF4	BBCABW					P-value
1	1231981	-	120.198	0.470712	0.974219	SDF4	VARR		BA	vs	BBCABW	0.914913
1	1324653	-	100.675	0.0423753	0.984375	INTS11	BA		BA	vs	SSCAGC	1.69997e-08
1	1375200	-	124.819	0.049084	0.955975	AURKAIP1	VARR		BA	vs	VARR	0.000187592
1	1407278	-	105.656	1.09491	0.953866	MRPL20	VARR		BBCABW	vs	SSCAGC	9.52795e-06
1	1407293	-	246.087	0.501646	0.970445	MRPL20	BA		BBCABW	vs	VARR	0.00577996
1	1512162	+	113.993	-0.379168	0.952096	ATAD3A	BBCABW		SSCAGC	vs	VARR	7.00455e-12
1	1891070	-	153.113	0.118652	0.989247	GNB1	BA
1	1891087	-	163.402	-0.0357825	0.839552	GNB1	VARR
1	2194772	-	130.271	-0.322836	0.980707	FAAP20	BBCABW
1	2391842	+	196.146	0.0795278	0.981651	RER1	BA
1	6199588	-	125.202	0.344352	0.973525	RPL22	BA
1	6393377	-	163.737	-0.145819	0.954128	ACOT7	BBCABW
1	7961681	+	198.199	-0.276883	0.809249	PARK7	VARR
1	8878644	-	669.198	-0.827985	0.942063	ENO1	BA
1	8878683	-	3249.49	-0.558606	0.979546	ENO1	BA
1	8878686	-	15132.3	-0.279371	0.966416	ENO1	BA
1	8878688	-	2804.61	-0.389277	0.960433	ENO1	BA
1	8878709	-	616.475	0.25251	0.891498	ENO1	VARR
1	8878712	-	428.763	-0.17012	0.968068	ENO1	VARR
1	8878716	-	103.627	-0.587219	0.976319	ENO1	BA
1	8878720	-	163.056	-0.177839	0.983004	ENO1	BA
1	9823960	-	168.899	0.0287411	0.977273	CLSTN1	BA
1	9823965	-	321.949	-0.0880614	0.980439	CLSTN1	BA
1	9943359	-	115.107	0.165769	0.949561	LZIC	BBCABW
1	10399034	+	144.567	0.0444635	0.932796	PGD	BBCABW
1	10399043	+	108.101	-0.47341	0.578571	PGD	VARR
1	10399069	+	6585.08	0.0626381	0.965201	PGD	BBCABW
1	11012654	+	499.043	-0.0752247	0.952843	TARDBP	BBCABW
1	11736136	+	105.978	-0.102312	0.980707	AGTRAP	VARR
1	17054029	-	410.489	-0.186127	0.944726	SDHB	VARR
1	17439671	-	230.901	-0.0448087	0.913581	RCC2	BA
1	18956631	-	108.349	-0.759989	0.877544	IFFO2	BBCABW
1	19251795	+	215.384	0.364786	0.98227	MRTO4	BA
1	19251805	+	475.05	0.149436	0.980717	MRTO4	BA
1	19251820	+	228.35	0.13548	0.953323	MRTO4	BA
1	20661450	-	101.478	-0.518168	0.989247	DDOST	BA
1	20786666	-	123.253	-0.0755927	0.968965	HP1BP3	BBCABW
1	22052671	+	197.328	-0.128551	0.973384	CDC42	VARR
1	22052692	+	111.007	0.0613439	0.989247	CDC42	SSCAGC
1	22052711	+	508.688	-0.0849712	0.948544	CDC42	BBCABW
1	22052720	+	151.652	0.222431	0.956019	CDC42	BA
1	23559529	-	631.828	0.0719414	0.801128	ID3	BA
1	23691794	+	110.349	0.336002	0.925	RPL11	VARR
1	23743471	+	124.76	0.188675	0.93765	ELOA	BBCABW
1	23778418	+	137.419	0.455834	0.946168	PITHD1	BA
1	23980354	-	176.247	-0.220808	0.985294	SRSF10	BA
1	24643302	+	157.565	-0.234458	1	SRRM1	BA
1	24745447	+	375.107	-0.372054	0.957944	CLIC4	BA
1	25247454	-	384.222	-0.195577	0.904113	RSRP1	BBCABW
1	25338334	+	197.833	-0.169427	0.97601	TMEM50A	BA
1	25906419	-	940.657	-0.831198	0.982704	STMN1	BA
1	26169927	+	588.559	0.172743	0.958385	ZNF593	BBCABW
1	26169929	+	104.075	0.192342	0.932773	ZNF593	BA
1	26280099	+	191.808	-0.259416	0.96886	SH3BGRL3	BBCABW
1	26863149	+	1705.57	-0.328064	0.89824	SFN	BA
1	26863151	+	551.162	-0.20148	0.946809	SFN	VARR
1	26890274	-	150.205	-0.227166	0.937753	GPN2	BA
1	26921760	+	101.581	0.282355	0.962419	NUDC	BA
1	27914575	-	100.489	0.287545	0.926606	RPA2	BBCABW
1	28236121	+	399.767	0.0316521	0.982576	ATP5IF1	BBCABW
1	28236124	+	566.584	-0.649223	0.994833	ATP5IF1	BA
1	28236131	+	134.185	0.416263	0.977035	ATP5IF1	BA
1	28236154	+	519.09	-0.320612	0.988373	ATP5IF1	BA
1	28518255	+	148.308	0.201942	0.979123	RCC1	BBCABW
1	28736940	+	156.551	-0.41581	0.930435	YTHDF2	BA
1	31296764	-	104.41	-0.538397	0.976077	SNRNP40	BA
1	31296782	-	135.409	-0.00792343	0.96648	SNRNP40	BBCABW
1	31644873	-	191.405	-0.436156	0.982499	PEF1	BA
1	32108056	+	116.571	-0.328215	0.961438	KPNA6	BBCABW
1	32222392	+	126.583	-0.401637	0.968085	EIF3I	BA
1	32222407	+	4566.27	0.101104	0.98976	EIF3I	BA
1	32222411	+	678.048	0.312154	0.944687	EIF3I	BA
1	32222433	+	379.325	-0.0358675	0.953943	EIF3I	BBCABW
1	32817349	-	151.092	0.652453	0.979452	YARS1	BA
1	32817358	-	215.647	0.078851	0.973112	YARS1	SSCAGC
1	32817414	-	167.032	0.34164	0.921569	YARS1	BBCABW
1	33036879	-	137.019	0.0817892	0.938462	AK2	BA
1	33036883	-	127.461	0.0598734	0.977172	AK2	VARR
1	35641526	-	645.219	0.174217	0.944258	PSMB2	BA
1	35641538	-	432.883	-0.0302327	0.90642	PSMB2	VARR
1	36149486	-	175.985	0.30416	0.97467	TRAPPC3	BBCABW
1	36397906	-	123.793	-0.00185401	0.984674	LSM10	BBCABW
1	37595935	-	329.5	-0.348054	0.953293	GNL2	BBCABW
1	37807790	+	117.888	0.0977534	0.966102	C1orf122	BA
1	37808208	-	118.925	-0.175664	0.936842	YRDC	BBCABW
1	37990022	-	154.11	0.150278	0.94409	SF3A3	VARR
1	38012734	+	112.391	0.239375	0.940782	UTP11	BA
1	38873348	-	415.029	0.408477	0.981132	MYCBP	BBCABW
1	38991288	+	107.21	0.108912	0.921659	AKIRIN1	BBCABW
1	39026318	+	193.356	-0.218179	0.991538	NDUFS5	BA
1	39026325	+	672.985	0.389779	0.98495	NDUFS5	BA
1	39026330	+	119.379	-0.188361	0.993243	NDUFS5	VARR
1	39026346	+	158.359	-0.0612497	0.993311	NDUFS5	BA
1	39026350	+	878.005	-0.128761	0.979963	NDUFS5	BA
1	39026371	+	143.888	-0.435184	0.962228	NDUFS5	BA
1	39883504	-	274.696	-0.0447392	0.976331	TRIT1	BA
1	40097245	-	361.523	0.268528	0.986689	PPT1	BA
1	40097247	-	639.162	-0.202154	0.962541	PPT1	BA
1	40097254	-	146.072	-0.569002	0.962743	PPT1	BA
1	40979755	+	227.3	-0.241191	0.905145	CTPS1	BBCABW
1	42335232	-	138.655	0.0301801	0.931373	FOXJ3	BA
1	42658424	+	275.989	-0.326974	0.982398	PPIH	BA
1	42682418	+	339.192	0.234229	0.965986	YBX1	BBCABW
1	42958868	-	957.468	-0.539973	0.938559	SLC2A1	VARR
1	43358953	+	109.737	0.530951	0.953069	CDC20	BA
1	43358976	+	203.476	0.141745	0.993865	CDC20	BA
1	43358989	+	108.764	-0.365133	0.938272	CDC20	BA
1	43368011	-	106.452	-0.0471403	0.988439	ELOVL1	VARR
1	43974960	+	938.277	-0.249602	0.983815	ATP6V0B	VARR
1	44739837	+	185.397	-0.328388	0.967955	KIF2C	BA
1	44739862	+	123.938	-0.411409	0.953767	KIF2C	BA
1	44775545	+	389.541	0.155133	0.982461	RPS8	BA
1	44775547	+	209.568	0.0713517	0.908795	RPS8	VARR
1	44775561	+	161.216	-0.242035	0.980697	RPS8	BA
1	44775582	+	521.923	-0.122419	0.96789	RPS8	BA
1	44775586	+	123.614	-0.137066	0.984848	RPS8	SSCAGC
1	45551065	+	133.213	-0.45684	0.994376	AKR1A1	BA
1	45584045	+	1079.03	-0.0018417	0.966604	NASP	BA
1	45688181	+	101.024	-0.222932	0.926564	TMEM69	BBCABW
1	46303651	+	213.17	0.424605	0.873668	UQCRH	BBCABW
1	46303661	+	147.597	0.45083	0.981824	UQCRH	BA
1	46303691	+	2534.16	0.145157	0.977763	UQCRH	BA
1	46303693	+	227.335	-0.105675	0.929524	UQCRH	VARR
1	46303720	+	260.902	-0.275428	1	UQCRH	BA
1	47333914	+	171.285	-0.0281285	0.981707	CMPK1	BA
1	52404602	+	334.597	0.0303597	0.948221	PRPF38A	BA
1	53238543	-	149.446	0.0608484	0.97541	MAGOH	BBCABW
1	53838282	-	118.277	-0.0909364	0.972222	NDC1	BA
1	54887195	-	117.78	-0.137418	0.975248	DHCR24	BA
1	58784043	-	369.544	-0.247109	0.835615	JUN	BA
1	62437050	+	106.316	0.0661813	0.966019	USP1	VARR
1	64966497	-	277.596	-0.513841	0.927273	JAK1	BA
1	64966501	-	174.328	-1.27721	0.954545	JAK1	BA
1	64966514	-	116.353	-0.6707	0.960784	JAK1	BA
1	65992735	+	183.934	0.676214	0.836302	PDE4B	BA
1	67430386	-	761.771	-0.264444	0.987578	SERBP1	BA
1	68497106	-	117.313	-0.265564	0.969231	DEPDC1	VARR
1	77219406	-	276.028	0.39413	0.973621	PIGK	BA
1	77219430	-	132.938	-0.633819	0.986264	PIGK	VARR
1	77979077	-	204.161	-0.201458	0.94198	FUBP1	BBCABW
1	78004939	+	144.733	0.248581	0.869212	DNAJB4	VARR
1	78004942	+	125.638	0.413129	0.871575	DNAJB4	BA
1	84506578	-	133.119	0.322963	0.964286	GNG5	BBCABW
1	85708415	-	114.906	0.0978627	0.948671	ZNHIT6	BA
1	86914126	-	156.868	0.212838	0.990883	SELENOF	BA
1	88891564	-	313.759	0.0906379	0.955548	GTF2B	BBCABW
1	89995110	+	131.857	-0.0218777	0.961538	ZNF326	SSCAGC
1	92832011	+	111.946	-0.194962	0.952381	RPL5	BA
1	92832013	+	118.767	-0.145351	0.941935	RPL5	BA
1	92832049	+	250.135	-0.24269	0.895062	RPL5	BA
1	92832073	+	445.341	-0.247825	0.978611	RPL5	VARR
1	93345909	+	131.966	-0.411965	0.877551	DR1	VARR
1	93909399	-	165.922	-0.00902836	0.919118	GCLM	BBCABW
1	93909430	-	421.697	0.246927	0.912945	GCLM	BBCABW
1	93909456	-	134.165	-0.0114451	0.886225	GCLM	BBCABW
1	100266216	+	155.496	0.13292	0.969298	RTCA	BBCABW
1	109076003	-	123.652	0.335136	0.963524	TAF13	BA
1	109213907	+	107.144	0.544702	0.963636	SARS1	BA
1	109213920	+	137.914	0.00831056	0.969666	SARS1	BBCABW
1	109213932	+	246.09	0.207765	0.933244	SARS1	BBCABW
1	109426437	-	443.56	0.0372703	0.95674	PSMA5	BA
1	109426448	-	256.73	0.288891	0.962102	PSMA5	BBCABW
1	109548635	+	168.848	-0.469528	0.993358	GNAI3	SSCAGC
1	109740316	-	103.071	-0.955858	0.988345	GSTM3	BA
1	109984786	+	206.347	-0.629136	0.953846	AHCYL1	BA
1	110391002	-	108.23	1.26207	0.827027	SLC16A4	BA
1	110391004	-	471.037	0.836755	0.941812	SLC16A4	BA
1	110391031	-	126.484	0.20315	0.967877	SLC16A4	BA
1	110391047	-	254.731	0.160061	0.958333	SLC16A4	BBCABW
1	110407694	-	176.376	0.11977	0.966647	LAMTOR5	VARR
1	110963920	-	302.295	-0.0680976	0.987952	LRIF1	BBCABW
1	111449451	+	225.6	0.133561	0.970508	ATP5PB	BA
1	111449458	+	139.688	-0.109367	0.947674	ATP5PB	BA
1	111449465	+	875.453	-0.382467	0.990234	ATP5PB	BA
1	111449494	+	340.195	-0.0884477	0.985169	ATP5PB	BA
1	112619818	+	260.26	0.0663479	0.956204	CAPZA1	BA
1	112619832	+	1707.92	-0.0165719	0.987188	CAPZA1	BA
1	112619834	+	150.197	-0.218017	0.990632	CAPZA1	BA
1	112619835	+	178.884	-0.0163119	0.879121	CAPZA1	BA
1	112619837	+	139.405	0.386604	0.893805	CAPZA1	BA
1	112707100	-	168.29	-0.0207725	0.989796	RHOC	SSCAGC
1	112707127	-	1886.85	-0.288265	0.98559	RHOC	BBCABW
1	112956195	-	434.192	0.24061	0.942556	SLC16A1	VARR
1	114581613	-	103.898	-0.397676	0.979177	BCAS2	VARR
1	114757977	-	161.364	0.0554512	0.977273	CSDE1	BA
1	114757981	-	245.192	0.101484	0.960146	CSDE1	BA
1	114757987	-	244.882	0.0607373	0.972901	CSDE1	BA
1	117929754	+	206.254	-0.0310281	0.948284	WDR3	BA
1	119711936	+	205.099	0.227383	0.965477	PHGDH	BBCABW
1	120176520	-	355.188	0.0890339	0.964912	SEC22B	BA
1	145927453	-	211.992	0.181059	0.958333	RBM8A	BBCABW
1	149812370	-	6026.35	-0.0160025	0.772454	H2BC18	BA
1	149832657	+	130.018	0.212065	0.887314	H4C14	VARR
1	149886682	-	13538.6	0.0187015	0.847026	H2BC21	BA
1	149886918	+	6363.33	-0.047547	0.841075	H2AC20	BA
1	149886919	+	1352.2	-0.470127	0.920176	H2AC20	BA
1	149886924	+	244.239	-0.0863644	0.785305	H2AC20	BA
1	149887961	-	509.112	0.027382	0.826087	H2AC21	BA
1	149887963	-	7738.67	-0.209159	0.843306	H2AC21	BBCABW
1	149927781	-	126.812	-0.0602781	0.850267	SF3B4	VARR
1	149927800	-	112.391	-0.121767	0.922535	SF3B4	VARR
1	149927803	-	533.643	-0.0863288	0.993671	SF3B4	BA
1	150236112	-	336.368	0.165536	0.928318	ANP32E	BBCABW
1	150268979	-	128.118	-0.0750351	0.929661	APH1A	BBCABW
1	150293842	+	134.797	0.18904	0.974376	MRPS21	BA
1	150293885	+	135.312	-0.298474	0.951038	MRPS21	BA
1	150579610	-	1259.41	-0.0704422	0.937525	MCL1	BBCABW
1	150629577	-	143.574	-0.0460515	0.989829	ENSA	BA
1	150629596	-	105.563	0.103079	0.956188	ENSA	BBCABW
1	150629612	-	127.114	0.107814	0.873418	ENSA	BA
1	151059573	-	132.725	0.0237232	0.975	CDC42SE1	BA
1	151190197	-	130.229	0.382096	0.959422	VPS72	BA
1	151399564	+	1425.43	-0.111006	0.982824	PSMB4	BBCABW
1	151459179	-	118.663	-0.336099	0.941558	POGZ	BA
1	151763496	-	311.325	-0.0184572	0.976318	MRPL9	BBCABW
1	151993828	-	297.393	0.0855391	0.886899	S100A10	BBCABW
1	151993835	-	115	0.369	0.5	S100A10	VARR
1	151993839	-	556.47	0.916844	0.266963	S100A10	BA
1	151993842	-	175.687	-0.361001	0.927461	S100A10	BA
1	151993846	-	101.365	0.115821	0.926471	S100A10	BA
1	151993859	-	555.027	-0.0224039	0.954545	S100A10	BA
1	152036961	-	103.65	-0.698402	0.925234	S100A11	BA
1	152036970	-	298.436	-0.533863	0.955567	S100A11	VARR
1	152036972	-	1498.24	-0.110441	0.951128	S100A11	BBCABW
1	152037003	-	383.125	-0.335862	0.5	S100A11	VARR
1	152037016	-	1112.47	-0.347981	0.947368	S100A11	VARR
1	153535991	-	13072.9	-0.388278	0.98299	S100A6	BA
1	153536012	-	3132.07	-0.452388	0.968939	S100A6	BBCABW
1	153536018	-	362.238	-0.521089	0.880779	S100A6	BA
1	153536020	-	493.352	-0.605277	0.974356	S100A6	BA
1	153536026	-	144.374	-0.273161	0.941667	S100A6	BA
1	153545806	-	8014.82	-0.02335	0.97969	S100A4	BBCABW
1	153549258	-	185.082	-0.964434	0.945969	S100A3	BBCABW
1	153613137	-	130.412	0.679439	0.649682	S100A16	VARR
1	153627505	-	1798.96	0.786847	0.989419	S100A13	BBCABW
1	153634075	+	108.501	-0.00945523	0.87394	CHTOP	BBCABW
1	153670972	-	133.93	-0.0761585	0.898085	ILF2	BA
1	153670987	-	255.737	0.0731643	0.976645	ILF2	BBCABW
1	153728073	+	109.677	-0.559819	0.988571	INTS3	BBCABW
1	153963537	-	125.266	-0.365723	0.972976	SLC39A1	BA
1	153963549	-	142.387	-0.464044	0.967362	SLC39A1	BA
1	153963550	-	146.047	-0.239996	0.957793	SLC39A1	BA
1	153977658	-	572.044	0.146346	0.884615	JTB	BA
1	153977674	-	155.991	0.436955	0.99	JTB	BA
1	154220621	-	167.704	0.0857892	0.947712	C1orf43	BA
1	154220637	-	256.03	-0.285992	0.9401	C1orf43	BBCABW
1	154272641	+	156.589	0.142305	0.972307	HAX1	BA
1	154970745	-	100.825	-0.240292	0.966387	SHC1	VARR
1	154970747	-	422.397	-0.224481	0.814815	SHC1	BA
1	155173238	-	201.401	-0.469049	0.912	KRTCAP2	BA
1	155173275	-	125.411	0.0401237	0.983201	KRTCAP2	BA
1	155173302	-	403.706	-0.156556	0.979362	KRTCAP2	BA
1	155173314	-	212.218	0.287087	0.912821	KRTCAP2	BA
1	155241243	-	174.667	-0.0706363	0.953625	GBA1	BA
1	155262360	-	266.765	-0.116065	0.957886	SCAMP3	BBCABW
1	155308840	+	334.702	0.0628008	0.939297	FDPS	BA
1	155308852	+	298.654	-0.178295	0.943089	FDPS	BA
1	155308873	+	138.177	-0.331487	0.924242	FDPS	BA
1	155308914	+	168.869	-0.309436	1	FDPS	BA
1	155308947	+	111.162	-0.411628	0.979487	FDPS	BA
1	155308948	+	131.633	-0.213266	0.981481	FDPS	BA
1	155324519	+	140.786	0.0343336	0.844444	RUSC1	BA
1	156020909	-	122.711	0.0311904	0.937001	SSR2	VARR
1	156212993	+	119.295	0.111125	0.98543	PMF1	BA
1	156213007	+	920.803	-0.0136678	0.979442	PMF1	BA
1	156282807	-	100.083	0.639286	0.924812	SMG5	BBCABW
1	156338207	-	139.869	-0.17634	0.945055	CCT3	BA
1	156338239	-	848.559	0.0225917	0.987197	CCT3	BA
1	156338290	-	393.536	0.181988	0.907659	CCT3	BA
1	156705583	-	120.903	-0.928626	0.983471	CRABP2	SSCAGC
1	156741088	-	427.564	-0.435537	0.948845	MRPL24	BA
1	156751674	-	679.818	0.3142	0.86	HDGF	VARR
1	156751685	-	300.035	0.192382	0.927325	HDGF	BA
1	156767539	+	103.383	0.29399	0.924216	PRCC	BBCABW
1	159780962	+	191.225	-0.157998	0.989899	DUSP23	BA
1	159925478	-	1300.77	-0.710359	0.959242	TAGLN2	BBCABW
1	159925482	-	106.622	-0.968007	0.947674	TAGLN2	BA
1	159925495	-	122.048	-0.712269	0.923077	TAGLN2	BA
1	159925501	-	233.63	-0.76526	0.925	TAGLN2	BA
1	159925507	-	6436.46	-0.663262	0.954572	TAGLN2	BA
1	159925510	-	428.836	-0.544888	0.968522	TAGLN2	BA
1	159925543	-	128.653	-0.406944	0.948276	TAGLN2	BA
1	160285130	-	131.821	0.544883	0.986702	ENSG00000258465	BA
1	161118037	-	160.621	-0.10509	0.992	PFDN2	VARR
1	161118105	+	101.655	0.47977	0.943463	NIT1	BBCABW
1	161153995	+	124.604	0.347423	0.943647	UFC1	VARR
1	161202367	+	352.971	-0.238436	0.984423	NDUFS2	BBCABW
1	161226060	+	111.036	0.124796	0.984848	TOMM40L	BA
1	161314381	+	3174.52	-0.116592	0.980626	SDHC	BBCABW
1	161314391	+	456.099	0.187922	0.983299	SDHC	BA
1	161314399	+	161.736	-0.200841	0.970588	SDHC	BA
1	164559184	+	156.267	1.03585	0.975709	PBX1	BA
1	165631209	+	557.928	-0.322106	0.984848	MGST3	BA
1	165631224	+	353.404	-0.232363	0.924242	MGST3	VARR
1	165631239	+	191.35	-0.172454	0.972833	MGST3	BA
1	165631243	+	443.554	0.063808	0.958647	MGST3	BBCABW
1	165631245	+	187.539	0.205693	0.966576	MGST3	BA
1	165631273	+	119.049	-0.441777	0.987295	MGST3	BA
1	165698562	-	138.962	0.432671	0.971415	ALDH9A1	BBCABW
1	165768868	-	324.51	0.0444917	0.982002	TMCO1	BA
1	165827584	+	127.844	0.0125942	0.990291	UCK2	BA
1	165827616	+	167.89	0.0117291	0.962791	UCK2	BA
1	167553762	-	363.476	-0.855034	0.968892	CREG1	BA
1	167935995	-	201.371	-0.277267	0.944444	MPC2	BBCABW
1	168178962	+	150.341	-0.409786	0.935065	TIPRL	BA
1	169106323	+	1802.28	-0.211773	0.913526	ATP1B1	BA
1	169106324	+	167.32	-0.290908	0.909976	ATP1B1	BA
1	169106690	+	422.823	-0.353624	0.957102	ATP1B1	BBCABW
1	173477310	+	228.422	0.377262	0.986547	PRDX6	BA
1	173477330	+	107.061	0.125418	0.988889	PRDX6	VARR
1	173477346	+	202.788	0.206679	0.988855	PRDX6	BA
1	173477386	+	573.919	0.00570119	0.982953	PRDX6	BA
1	175023418	-	116.011	-0.0689209	0.982923	MRPS14	BA
1	175023425	-	256.939	-0.288522	0.976305	MRPS14	BA
1	179877803	-	387.953	0.0684703	0.957544	TOR1AIP2	BA
1	179882297	+	107.574	0.295282	0.941176	TOR1AIP1	BBCABW
1	180154869	+	264.232	-0.104448	0.949153	QSOX1	BA
1	182839350	+	695.626	0.041212	0.96831	DHX9	BBCABW
1	185317243	-	410.059	-1.31647	0.937223	IVNS1ABP	BBCABW
1	186375254	-	208.339	0.288396	0.946507	TPR	BBCABW
1	186680423	-	318.279	2.4114	0.855424	PTGS2	BA
1	186828949	+	101.953	1.22922	0.971831	PLA2G4A	BA
1	192809041	+	112.279	1.4195	0.932402	RGS2	VARR
1	193105414	-	142.737	-0.174069	0.982513	GLRX2	BBCABW
1	197146669	-	186.727	-0.380336	0.984744	ASPM	VARR
1	200410058	-	122.556	-0.356378	0.905358	ZNF281	VARR
1	201469188	-	123.755	-0.221833	0.928	PHLDA3	VARR
1	201507116	-	207.255	-0.568403	0.932039	CSRP1	BBCABW
1	201507123	-	2495.37	-0.613535	0.979838	CSRP1	SSCAGC
1	201955503	+	371.96	-0.260725	0.992954	TIMM17A	BA
1	201955506	+	392.515	0.195301	0.968098	TIMM17A	BA
1	202010625	+	1502.71	0.167729	0.912369	ELF3	BA
1	202958312	-	152.692	0.227986	0.983957	ADIPOR1	VARR
1	203305519	+	132.95	0.81782	0.895833	BTG2	BA
1	203861581	+	104.273	-0.273553	0.993464	SNRPE	BBCABW
1	203861603	+	1311.68	0.175309	0.974741	SNRPE	BA
1	203861610	+	199.571	-0.147147	0.92353	SNRPE	VARR
1	203861627	+	264.598	-0.629181	0.986514	SNRPE	SSCAGC
1	204411817	-	348.681	0.21982	0.948119	PPP1R15B	BBCABW
1	205121975	-	130.766	0.146415	0.96732	RBBP5	BBCABW
1	205750182	-	313.607	0.024042	0.980392	NUCKS1	BA
1	207321684	+	108.785	0.10376	0.971429	CD55	BA
1	207752066	+	160.939	0.127263	0.985755	CD46	BA
1	207752083	+	103.985	0.144739	0.989209	CD46	BA
1	207752086	+	249.498	0.632352	0.92449	CD46	BA
1	211675621	-	119.613	0.249439	0.99631	NEK2	BA
1	212791777	-	464.723	-0.273511	0.965787	NSL1	BA
1	212791779	-	192.675	-0.222068	0.959131	NSL1	BBCABW
1	212791793	-	147.013	-0.106108	0.99187	NSL1	BA
1	214603214	+	135.605	-0.307839	0.971014	CENPF	BA
1	218285293	+	213.91	-0.349029	0.974038	RRP15	VARR
1	219173869	+	102.587	0.402838	0.954707	LYPLAL1	BA
1	219173878	+	119.405	-0.128162	0.954504	LYPLAL1	BBCABW
1	220046477	-	237.698	0.24814	0.983537	EPRS1	BBCABW
1	220094132	+	337.93	-0.24278	0.968254	IARS2	BA
1	222712564	+	178.238	-0.257125	0.872093	BROX	BBCABW
1	223712539	+	265.225	-0.0865436	0.764045	CAPN2	BBCABW
1	224356879	+	149.056	-0.477738	1	CNIH4	BA
1	225924169	-	122.072	0.0259439	1	PYCR2	BA
1	225924278	-	137.989	0.109267	0.942857	ENSG00000255835	BA
1	226062721	+	457.097	-0.0519573	0.96782	H3-3A	BA
1	226408090	-	230.381	0.279758	0.968664	PARP1	BA
1	226870620	+	123.204	-0.16314	0.90411	PSEN2	BA
1	227735435	+	105.98	0.188404	0.975248	SNAP47	BBCABW
1	228082708	+	882.618	-0.0225646	0.972475	ARF1	BA
1	228082717	+	400.882	-0.412053	0.978831	ARF1	BA
1	228082730	+	224.479	-0.0482863	0.838655	ARF1	VARR
1	228109299	-	675.717	0.0219323	0.973141	MRPL55	BBCABW
1	230067238	+	381.42	-0.598527	0.97541	GALNT2	BA
1	231337852	-	117.439	-0.025693	0.965654	EXOC8	BBCABW
1	231422285	-	102.443	0.851074	0.876923	EGLN1	BA
1	231528665	+	129.967	-0.275376	0.977961	TSNAX	BA
1	231528675	+	176.061	-0.0828215	0.941551	TSNAX	BBCABW
1	234373486	+	267.683	0.266834	0.920213	COA6	VARR
1	235128871	-	109.375	-0.329304	0.937547	TOMM20	BA
1	235328570	+	229.01	0.0354294	0.961551	ENSG00000285053	BBCABW
1	235367430	+	107.705	-0.715846	0.995294	TBCE	BA
1	241519711	-	144.205	-0.334507	0.969089	FH	BA
1	241519722	-	154.813	-0.0688027	0.948919	FH	BA
1	241519725	-	143.324	-0.591562	0.983759	FH	BA
1	241519749	-	105.044	0.16602	0.990547	FH	VARR
1	241848204	+	132.973	-0.112282	0.98057	EXO1	BA
1	244864482	-	100.662	-0.513588	0.743802	HNRNPU	VARR
1	244864491	-	252.741	-0.24354	0.971787	HNRNPU	BA
1	244864517	-	531.933	-0.222682	0.92719	HNRNPU	VARR
1	244864539	-	1126.61	0.132796	0.958528	HNRNPU	BA
1	244864542	-	3070.65	-0.0891056	0.964118	HNRNPU	VARR
1	244864544	-	1191.72	0.0396794	0.939004	HNRNPU	VARR
1	244864570	-	109.902	0.00838576	0.989247	HNRNPU	BA
1	246566254	-	120.246	0.352983	0.932487	TFB2M	BA
1	246566261	-	339.024	0.220636	0.958712	TFB2M	BA
2	264900	+	1108.51	-0.144553	0.97449	ACP1	BBCABW
2	3558360	-	152.429	-0.43811	0.964286	RNASEH1	BA
2	3575315	+	302.627	-0.058011	0.973153	RPS7	VARR
2	3575333	+	227.114	0.120107	0.781818	RPS7	BA
2	8682056	+	9994.58	0.417424	0.898323	ID2	BBCABW
2	9206812	+	152.96	-0.451798	0.94702	ASAP2	BA
2	9423456	-	157.026	-0.688779	0.980583	ITGB1BP1	BA
2	9423657	+	124.066	0.2306	0.962662	CPSF3	BA
2	9630969	-	4313.4	-0.258486	0.963699	YWHAQ	BA
2	9630980	-	225.771	-0.00516687	0.955003	YWHAQ	VARR
2	9630985	-	163.251	-0.342315	0.96757	YWHAQ	VARR
2	9630991	-	424.378	-0.0364721	0.946167	YWHAQ	VARR
2	9630997	-	1277.19	-0.0386076	0.989609	YWHAQ	BA
2	9631001	-	277.564	-0.109285	0.965974	YWHAQ	BA
2	9631010	-	100.012	0.234411	0.940594	YWHAQ	VARR
2	10122712	+	106.752	0.150638	0.946429	RRM2	BA
2	10689975	-	578.064	-0.0222635	0.979971	NOL10	BA
2	10812754	-	126.391	-0.43345	0.836538	PDIA6	BA
2	11155477	+	129.074	-0.823586	1	SLC66A3	BA
2	15591868	+	303.439	-0.115348	0.971429	DDX1	BBCABW
2	20225094	-	160.575	-0.418016	0.945736	SDC1	BA
2	20225130	-	415.588	-0.430161	0.945599	SDC1	BBCABW
2	20447074	+	1763.02	-0.614364	0.911341	RHOB	BA
2	20823101	-	221.173	0.280882	0.94	LDAH	BBCABW
2	24076347	-	243.874	-0.376311	0.982	SF3B6	BA
2	24076350	-	211.855	0.247958	0.97975	SF3B6	BA
2	24084772	-	259.913	-1.36352	0.979866	TP53I3	BA
2	24084775	-	297.429	-0.832075	0.98	TP53I3	BA
2	24084778	-	353.64	-0.446235	0.994681	TP53I3	BA
2	24084828	-	242.485	-0.258695	0.977273	TP53I3	BBCABW
2	24084834	-	235.009	-0.526944	0.987302	TP53I3	BA
2	26034089	+	144.223	-0.00831643	0.938931	RAB10	VARR
2	26034118	+	120.149	-0.0773572	0.854356	RAB10	BA
2	26244604	-	140.706	0.170181	0.982865	HADHA	BA
2	26244619	-	271.103	-0.00819146	0.98233	HADHA	BBCABW
2	26244632	-	552.835	0.027082	0.971313	HADHA	BA
2	26244928	+	191.852	-0.125499	0.99435	HADHB	BA
2	26244939	+	538.164	0.184335	0.983672	HADHB	BA
2	26346146	+	294.619	-0.141519	0.99057	SELENOI	BA
2	26764321	+	121.354	0.105031	0.976744	SLC35F6	BA
2	26786067	+	185.911	-0.440696	0.954327	CENPA	VARR
2	26970637	+	159.946	0.206849	0.972346	MAPRE3	BBCABW
2	27071649	-	513.022	-0.255944	0.985469	OST4	BA
2	27071658	-	649.094	-0.112291	0.988904	OST4	VARR
2	27071669	-	624.218	-0.160017	0.979226	OST4	BA
2	27071670	-	188.518	0.148509	0.973568	OST4	VARR
2	27071673	-	190.01	0.0393566	0.985967	OST4	BA
2	27134636	-	129.148	-0.27863	0.958363	PREB	BBCABW
2	27212361	+	763.156	-0.0534398	0.9858	ATRAID	BA
2	27323097	-	155.791	0.0663172	1	MPV17	BA
2	27356764	-	183.898	-0.21317	0.991543	GTF3C2	BA
2	27370615	+	176.38	-0.00496296	0.963583	SNX17	BBCABW
2	27370617	+	387.284	0.19244	0.988677	SNX17	BA
2	27370627	+	130.901	-0.158405	0.952	SNX17	VARR
2	27409591	-	152.642	0.0101947	0.969017	PPM1G	BBCABW
2	27428626	+	302.887	-0.323437	0.96431	NRBP1	BBCABW
2	27663609	-	170.725	-0.460283	0.978521	SUPT7L	BA
2	27771765	+	227.728	-0.203451	0.934256	MRPL33	VARR
2	28870309	-	157.201	-0.227803	0.951031	TRMT61B	BBCABW
2	28894690	+	294.581	-0.146593	0.969741	WDR43	BA
2	30147007	+	133.679	-0.0196235	0.958763	YPEL5	BBCABW
2	30447221	+	128.935	-0.553698	0.953846	LCLAT1	VARR
2	30447246	+	143.293	-0.0882873	0.962761	LCLAT1	BA
2	30447276	+	103.562	-0.345306	0.934783	LCLAT1	BA
2	32039805	-	368.73	-0.238162	0.963194	DPY30	BA
2	32039809	-	126.513	0.16439	0.975763	DPY30	BBCABW
2	32039816	-	118.382	0.261388	0.9625	DPY30	BA
2	32165864	+	466.111	-0.344849	0.987951	SLC30A6	BA
2	32165882	+	115.315	-0.330232	0.982712	SLC30A6	BA
2	32628096	+	103.248	-0.498586	0.976306	TTC27	VARR
2	36355778	+	591.511	-0.347882	0.947368	CRIM1	VARR
2	36355781	+	205.976	-0.0393744	0.910714	CRIM1	BA
2	37196498	+	281.224	-0.068529	0.982759	CEBPZOS	BBCABW
2	37231589	-	218.311	-0.00447438	0.968321	CEBPZ	BA
2	38751359	-	1395.29	-0.056661	0.952873	SRSF7	BA
2	38778221	+	100.101	0.686525	0.957585	GEMIN6	BA
2	38875996	+	123.311	-0.224896	0.987654	MORN2	SSCAGC
2	43996005	-	389.913	-0.193828	0.980762	LRPPRC	BBCABW
2	44168877	+	121.107	-0.421525	0.774775	PPM1B	VARR
2	44361492	-	115.766	-0.263112	0.975125	PREPL	BA
2	46297407	+	2093.6	-1.41039	0.952381	EPAS1	BA
2	46542702	+	108.589	-0.735002	0.986607	RHOQ	VARR
2	46617204	+	105.207	0.0789952	0.956334	CRIPT	BA
2	46617232	+	113.775	-0.559792	0.972727	CRIPT	BA
2	47176511	-	9226.12	-0.411511	0.954144	CALM2	BA
2	47176514	-	611.402	-0.525151	0.947966	CALM2	BA
2	47176515	-	470.144	-0.133898	0.934925	CALM2	BA
2	47783145	+	539.272	-0.287649	0.989459	MSH6	BA
2	54456327	+	127.985	-0.479101	0.97804	SPTBN1	BBCABW
2	54558383	+	343.98	-0.689924	0.923858	SPTBN1	SSCAGC
2	55050451	-	1299.17	-0.312667	0.946226	RTN4	BBCABW
2	55050497	-	264.577	-0.151369	0.965665	RTN4	VARR
2	55050499	-	324.719	-0.242083	0.935484	RTN4	BA
2	55050507	-	167.036	0.200439	0.935484	RTN4	VARR
2	55050535	-	117.752	0.0944215	0.952799	RTN4	BBCABW
2	55269217	-	119.979	-0.0963596	0.987466	MTIF2	BA
2	58241323	-	137.831	-0.546633	0.968142	FANCL	BA
2	61145116	+	182.034	-0.673921	0.982891	C2orf74	BA
2	61538324	-	214.365	-0.215418	0.953471	XPO1	VARR
2	61888580	-	100.831	-0.362425	0.944954	CCT4	BA
2	61888597	-	276.629	0.0951196	0.959112	CCT4	BBCABW
2	61888612	-	475.804	-0.104306	0.892565	CCT4	VARR
2	61905674	+	194.908	0.26696	0.987227	COMMD1	BA
2	63588968	+	309.677	0.418049	0.973992	MDH1	BBCABW
2	63588979	+	242.004	0.081102	0.977958	MDH1	BA
2	65130106	-	233.75	-0.148583	0.958289	RAB1A	BBCABW
2	65130128	-	135.521	0.193622	0.964354	RAB1A	BA
2	65227847	+	119.696	0.269983	0.919271	ACTR2	VARR
2	68063004	-	212.239	0.14362	0.981763	C1D	BA
2	68252497	-	250.008	-0.205421	0.941154	PPP3R1	BBCABW
2	69013179	+	498.101	-1.38751	0.901993	ANTXR1	BA
2	69437435	-	231.783	0.131253	0.960331	NFU1	BBCABW
2	69742103	+	115.315	-0.549442	0.979104	ANXA4	BA
2	69742105	+	143.314	0.0513476	0.893443	ANXA4	BA
2	69893956	+	218.714	-0.0279118	0.955095	SNRNP27	BBCABW
2	70087477	+	299.285	0.0399878	0.971098	PCBP1	BA
2	70258143	+	162.415	-0.813921	0.990721	PCYOX1	SSCAGC
2	70293675	-	137.628	-0.930407	0.984513	SNRPG	BA
2	70293680	-	358.484	-0.227283	0.932747	SNRPG	VARR
2	70293709	-	167.875	-0.267531	0.96559	SNRPG	BA
2	70293715	-	882.634	-0.103306	0.978146	SNRPG	BA
2	70293717	-	838.397	-0.18473	0.946333	SNRPG	BA
2	70293728	-	137.319	-0.214328	0.974026	SNRPG	BA
2	70293730	-	521.156	0.164524	0.981467	SNRPG	VARR
2	70293731	-	431.441	-0.0663301	0.979657	SNRPG	VARR
2	70293737	-	775.681	-0.142512	0.980784	SNRPG	BA
2	70302025	-	178.279	0.056014	0.972222	FAM136A	SSCAGC
2	70768197	-	104.827	-0.0531165	0.947644	ADD2	BBCABW
2	71130634	+	203.52	-0.256016	0.972835	MPHOSPH10	BA
2	73214245	+	478.175	-0.202464	0.971583	SMYD5	BBCABW
2	73234290	+	630.864	0.3356	0.981657	CCT7	BA
2	73234308	+	431.359	-0.429433	0.983076	CCT7	BBCABW
2	73737332	-	554.001	-0.0697271	0.990851	TPRKB	BA
2	74147912	-	156.657	0.183068	0.995829	BOLA3	BBCABW
2	74472687	-	580.4	0.216686	0.981935	MRPL53	BA
2	74529698	-	259.271	0.231306	0.939452	AUP1	VARR
2	74958643	+	322.657	-0.0472761	0.986257	POLE4	BBCABW
2	74958645	+	111.114	0.25025	0.976744	POLE4	BA
2	75646785	+	510.697	0.0141401	0.965083	MRPL19	BA
2	75646801	+	110.034	-0.109116	0.968553	MRPL19	BA
2	84459261	-	270.305	0.20809	0.979592	SUCLG1	BA
2	84459269	-	235.063	0.186613	0.972851	SUCLG1	BA
2	84459277	-	414.626	-0.0541099	0.942503	SUCLG1	BBCABW
2	85327973	-	203.242	-0.0539666	0.975265	TGOLN2	BA
2	85327987	-	131.834	-0.565565	0.910698	TGOLN2	VARR
2	85327989	-	1072.81	-0.319715	0.985755	TGOLN2	BA
2	85414016	-	139.112	0.0614317	0.974619	CAPG	BA
2	85561493	-	185.09	0.184808	0.97892	GGCX	VARR
2	85595722	+	177.571	0.0306887	0.98951	RNF181	BA
2	85595748	+	616.055	0.185972	0.982963	RNF181	BA
2	85616189	+	131.997	-0.0896233	0.927419	USP39	BA
2	86105886	-	148.864	0.294455	0.959235	POLR1A	VARR
2	86106235	+	201.177	-0.00965671	0.828081	PTCD3	BA
2	86195442	-	512.43	0.0726937	1	IMMT	BBCABW
2	86199457	+	120.697	0.0106617	0.980769	MRPL35	BA
2	86199463	+	455.696	-0.0781753	0.982201	MRPL35	VARR
2	86563420	-	195.43	0.0398803	0.983871	CHMP3	VARR
2	96208822	-	205.331	0.20462	0.94451	STARD7	BBCABW
2	96305508	-	180.097	-0.815253	0.979657	SNRNP200	VARR
2	96335801	+	104.413	-0.406322	0.985075	NCAPH	BA
2	97646048	+	166.788	-0.438335	0.990346	COX5B	BA
2	97646062	+	813.301	0.00581784	0.987323	COX5B	BA
2	97646074	+	386.35	-0.544347	0.984295	COX5B	BA
2	99181186	+	275.648	-0.0474964	0.949109	MRPL30	BA
2	99336321	-	108.274	-0.168412	0.979223	TXNDC9	SSCAGC
2	99336331	-	136.009	-0.0497195	0.971963	TXNDC9	BA
2	99337389	+	196.486	0.380182	0.97276	EIF5B	BBCABW
2	101002274	+	1273.15	0.215066	0.965061	RPL31	BBCABW
2	101002276	+	759.869	0.182064	0.915727	RPL31	BA
2	101002299	+	270.104	0.400423	0.901358	RPL31	BA
2	101151382	-	124.89	0.456347	0.927711	TBC1D8	BA
2	101308690	-	111.868	-0.737934	0.967921	RNF149	BBCABW
2	105038077	+	108.551	0.50084	0.975248	MRPS9	BA
2	106886167	-	183.649	-1.52871	0.915254	ST6GAL2	BBCABW
2	108534470	+	140.4	0.26459	0.925234	LIMS1	BBCABW
2	110212529	-	125.658	-0.0704151	0.979742	MTLN	SSCAGC
2	110678063	-	165.089	-0.291577	0.972308	BUB1	BA
2	111120914	+	143.061	-0.24475	0.94	BCL2L11	BBCABW
2	111884186	-	150.484	-0.502513	0.903846	ANAPC1	VARR
2	112255042	-	155.395	0.0896408	0.975904	ZC3H8	BBCABW
2	112645941	+	239.274	-0.410724	0.886654	SLC20A1	BA
2	113756620	-	166.791	-0.283384	0.958929	SLC35F5	BBCABW
2	113756642	-	154.372	-0.591008	0.961843	SLC35F5	VARR
2	113890072	+	317.474	-0.207801	0.960714	ACTR3	BA
2	113890097	+	161.45	-0.0914052	0.9668	ACTR3	BA
2	117814691	+	185.727	-0.135057	0.93648	DDX18	BA
2	117814708	+	165.207	0.320247	0.935836	DDX18	VARR
2	117814712	+	221.908	0.221018	0.967419	DDX18	BA
2	119366964	+	129.135	0.382007	0.97619	DBI	BA
2	119366966	+	140.706	-0.205094	0.926172	DBI	VARR
2	119366977	+	2878.49	-0.15813	0.969428	DBI	BBCABW
2	119366992	+	499.982	-0.175215	0.980999	DBI	BA
2	120223400	-	111.297	-0.974024	0.978142	TMEM185B	BBCABW
2	121755662	+	207.118	0.106905	0.951967	TSN	BA
2	127294144	-	159.093	-0.667512	0.971213	ERCC3	BA
2	127526489	-	120.966	0.00288904	0.965686	IWS1	BA
2	128091200	+	131.605	-0.115462	0.995833	UGGT1	SSCAGC
2	130181595	-	112.545	-0.213758	0.972046	SMPD4	BA
2	130182262	+	691.23	-0.317892	0.982478	MZT2B	BA
2	130342897	+	276.109	-0.0107541	0.983539	IMP4	VARR
2	131105305	+	419.801	0.309506	0.974548	PLEKHB2	BA
2	131105336	+	673.438	-0.266692	0.984583	PLEKHB2	BBCABW
2	135876424	-	131.308	-0.0394128	0.948177	MCM6	VARR
2	135876441	-	100.315	0.403252	0.95756	MCM6	VARR
2	135985626	-	185.842	-0.909667	0.986667	DARS1	BA
2	142877628	+	199.801	0.0957396	0.897196	KYNU	BA
2	142877664	+	3729.91	0.202816	0.914795	KYNU	BA
2	142877666	+	264.164	0.197817	0.81749	KYNU	BA
2	149587756	-	117.996	0.394548	0.986726	MMADHC	SSCAGC
2	150487665	-	313.221	-0.554293	0.860805	RND3	BA
2	151828501	-	132.862	0.568608	0.971429	ARL5A	BBCABW
2	152717409	-	360.467	-0.464611	0.972644	PRPF40A	BA
2	152717461	-	116.815	0.167722	0.961538	PRPF40A	BBCABW
2	161160428	+	172.415	-0.0686123	0.8875	TANK	BBCABW
2	161308425	+	133.122	-0.148942	0.934086	PSMD14	VARR
2	161308426	+	114.89	-0.14806	0.910596	PSMD14	BA
2	166375944	-	105.805	0.105059	0.94	SCN9A	BBCABW
2	169798871	+	112.027	0.243209	0.981232	SSB	BA
2	169798889	+	124.898	0.172146	0.975541	SSB	BA
2	171433990	-	109.403	0.0869684	0.966102	METTL8	BA
2	171894244	-	122.658	-0.208613	0.974227	SLC25A12	BBCABW
2	171922422	+	112.091	0.308247	0.988372	HAT1	BA
2	171922435	+	139.336	0.0715198	0.970772	HAT1	BBCABW
2	171922462	+	108.159	-0.0962315	0.971145	HAT1	BA
2	171999953	+	110.021	0.220938	0.988095	METAP1D	BA
2	172427586	+	109.257	0.809107	0.978022	ITGA6	BA
2	173075849	+	128.105	-0.585933	0.911362	MAP3K20	BBCABW
2	174248506	-	139.394	-0.00947901	0.997247	OLA1	VARR
2	174248516	-	271.101	0.15267	0.995025	OLA1	BA
2	175181704	-	103.128	-0.00954049	0.795455	ATP5MC3	BBCABW
2	175181710	-	706.599	0.01496	0.979003	ATP5MC3	BA
2	177392773	+	119.563	-0.452198	0.989398	AGPS	SSCAGC
2	182716285	+	108.475	-0.231695	0.857143	DNAJC10	VARR
2	186486253	+	116.927	0.464171	0.929883	ZC3H15	BA
2	187554435	-	550.971	0.63078	0.924538	TFPI	VARR
2	189179805	-	193.454	0.0899611	0.971233	COL5A2	SSCAGC
2	189441474	+	582.491	-0.0455699	0.948586	WDR75	BBCABW
2	189661483	+	139.016	-0.0886021	0.945946	ASNSD1	VARR
2	190880821	+	1122.08	-0.189419	0.919589	GLS	BBCABW
2	191014172	-	158.548	-0.447806	0.979592	STAT1	BA
2	191245408	+	166.402	-0.852592	0.973333	MYO1B	BA
2	191245427	+	102.004	-0.358887	0.940678	MYO1B	BA
2	191678136	+	388.408	-0.186446	0.90237	NABP1	BA
2	196171578	-	178.033	0.187847	0.95082	STK17B	VARR
2	197435028	-	2010.12	-0.0474329	0.973889	SF3B1	BBCABW
2	197435045	-	105.408	-0.306177	0.953975	SF3B1	VARR
2	197499835	-	2807.89	-0.231141	0.975312	HSPD1	BBCABW
2	197499847	-	422.302	-0.269436	0.969754	HSPD1	BBCABW
2	197499866	-	1463.68	0.102165	0.949805	HSPD1	BBCABW
2	197499874	-	167.956	0.497696	0.838235	HSPD1	BA
2	197499881	-	219.55	0.32667	0.931034	HSPD1	VARR
2	197500358	+	633.853	0.559945	0.937709	HSPE1	BA
2	197500404	+	477.348	-0.430572	0.994203	HSPE1-MOB4	BA
2	197500409	+	105.362	-0.301777	0.95858	HSPE1-MOB4	VARR
2	197500414	+	119.492	-0.65111	0.87037	HSPE1-MOB4	BA
2	197516047	+	153.988	0.175279	0.972332	MOB4	BA
2	197516066	+	143.317	-0.708546	0.98	MOB4	BA
2	197705369	+	113.2	0.409053	0.963077	MARS2	BA
2	199955793	+	149.115	-0.150043	0.960453	MAIP1	BBCABW
2	200811888	+	272.134	-0.106531	0.970588	BZW1	BA
2	200811910	+	1009.47	-0.315514	0.940331	BZW1	BA
2	200811922	+	376.029	0.0763393	0.943844	BZW1	BA
2	200864658	-	340.006	0.180123	0.919107	CLK1	BBCABW
2	200963660	-	100.136	-0.628778	0.974895	ORC2	BA
2	201071995	+	208.218	0.509162	0.994293	NDUFB3	BA
2	201072024	+	196.859	-0.467206	0.981272	NDUFB3	BA
2	201072031	+	114.469	-0.337736	0.938812	NDUFB3	BA
2	201118716	+	100.792	-1.0461	0.929553	CFLAR	BA
2	202238569	-	228.308	0.24324	0.907407	SUMO1	BA
2	202238585	-	115.7	-0.0408512	0.876254	SUMO1	VARR
2	202265727	+	185.607	0.443754	0.973801	NOP58	BA
2	202265736	+	189.098	0.614654	0.754722	NOP58	BA
2	202265747	+	148.634	-0.0943936	0.965598	NOP58	BA
2	202265765	+	101.572	0.409159	0.933715	NOP58	BA
2	202265771	+	187.586	-0.307072	0.942727	NOP58	BBCABW
2	206159425	-	149.436	-0.514925	0.974652	NDUFS1	BBCABW
2	206159609	+	254.882	0.124036	0.991525	EEF1B2	SSCAGC
2	206159635	+	211.568	0.136425	0.991117	EEF1B2	BA
2	208255113	-	115.14	0.187955	0.969388	IDH1	VARR
2	210002638	+	245.463	-0.0913676	0.969218	RPE	BA
2	215312062	+	430.208	-0.270812	0.970092	ATIC	BBCABW
2	215312064	+	111.454	-0.539091	0.960199	ATIC	BA
2	215312081	+	313.579	-0.424349	0.930159	ATIC	BA
2	215312089	+	117.261	-0.252031	0.947674	ATIC	BA
2	215312130	+	131.068	-0.353565	0.956522	ATIC	BBCABW
2	216109351	+	442.053	-0.491022	0.97921	XRCC5	BA
2	216109390	+	200.886	-0.0927955	0.979596	XRCC5	VARR
2	216109405	+	174.574	-0.367475	0.984874	XRCC5	VARR
2	216109415	+	157.827	-0.0340461	0.927983	XRCC5	VARR
2	216498797	+	143.17	0.120628	0.967832	RPL37A	BBCABW
2	216498815	+	118.898	-0.0453936	0.967427	RPL37A	BA
2	218399870	+	136.553	-0.238481	0.937063	CTDSP1	BA
2	218672002	-	117.134	-0.206142	0.962927	RNF25	BBCABW
2	219218958	-	309.257	-0.104986	0.950739	ABCB6	BA
2	219253909	-	207.727	-0.944188	0.935185	TUBA4A	BBCABW
2	219253916	-	7031.44	-1.02061	0.955231	TUBA4A	BBCABW
2	219253921	-	311.298	-1.36011	0.967427	TUBA4A	BA
2	222656073	-	114.94	0.164705	0.927124	FARSB	BA
2	222656078	-	209.037	0.143785	0.94053	FARSB	BA
2	222656090	-	164.239	0.15784	0.97563	FARSB	BBCABW
2	222861036	+	791.829	-0.823954	0.954972	ACSL3	VARR
2	223837566	-	117.336	0.749734	0.887701	AP1S3	BA
2	223837582	-	165.957	0.258492	0.926316	AP1S3	BBCABW
2	223837601	-	192.665	0.340879	0.926281	AP1S3	BBCABW
2	223945299	-	221.754	-0.628303	0.892308	ENSG00000286239	BA
2	227325251	+	285.708	-0.136869	0.927083	MFF	BA
2	227379304	-	154.587	-0.990311	0.918993	TM4SF20	BA
2	227379306	-	291.077	-0.945438	0.89792	TM4SF20	BA
2	227472165	+	130.725	-0.1756	0.975882	AGFG1	VARR
2	227472167	+	106.668	0.0644005	0.904988	AGFG1	VARR
2	231056878	+	117.22	0.278755	0.975904	PSMD1	VARR
2	231464484	-	6207.65	-0.211668	0.975885	NCL	BBCABW
2	231464497	-	243.833	-0.148507	0.972355	NCL	BBCABW
2	231708530	+	6881.24	0.243701	0.867911	PTMA	BBCABW
2	232550689	+	262.074	-0.198142	0.963519	EIF4E2	BBCABW
2	232697331	+	313.782	-0.0359138	0.975517	GIGYF2	BA
2	232875832	+	104.863	-1.3172	0.944444	SNORC	BA
2	233251672	+	198.844	0.0101559	0.952055	ATG16L1	VARR
2	233854535	-	735.358	0.0156559	0.909617	HJURP	BBCABW
2	236569825	+	183.355	-0.777454	0.844262	ACKR3	BBCABW
2	237085889	+	158.076	0.289835	0.99403	COPS8	BA
2	237085908	+	134.6	-0.100169	0.765152	COPS8	VARR
2	237487251	+	553.194	0.196968	0.934631	MLPH	BBCABW
2	237692333	+	101.815	-0.238849	0.922078	LRRFIP1	BBCABW
2	237967014	+	322.647	0.408793	0.966292	UBE2F	BBCABW
2	240136303	-	721.28	0.0233391	0.985495	COPS9	BA
2	241102287	-	153.868	-0.253105	0.985718	MTERF4	BA
2	241150483	+	117.798	0.272611	0.936	PPP1R7	VARR
2	241315225	-	119.565	-0.244503	0.991597	HDLBP	BA
2	241315672	-	1865.57	0.0268324	0.986381	HDLBP	VARR
2	241637693	+	427.752	-0.344759	0.963115	ATG4B	BBCABW
3	3126940	+	124.986	-0.0432601	0.981132	TRNT1	BA
3	3179691	-	220.287	0.173403	0.982932	CRBN	VARR
3	4979437	+	398.995	-0.409682	0.846154	BHLHE40	BBCABW
3	4979459	+	109.164	-0.579987	0.910112	BHLHE40	BA
3	4979463	+	257.122	-0.175713	0.873016	BHLHE40	VARR
3	4979489	+	143.222	-0.397974	0.904437	BHLHE40	BBCABW
3	5122292	+	263.274	-0.444538	0.972575	ARL8B	BBCABW
3	8501825	+	109.49	0.0288747	0.907514	LMCD1	BBCABW
3	9397863	+	123.977	-0.19589	0.920792	SETD5	BBCABW
3	9793082	+	1135.23	-0.282609	0.95089	ARPC4	BBCABW
3	9793090	+	170.434	-0.479947	0.943343	ARPC4	BA
3	9793108	+	120.489	-0.404704	0.961039	ARPC4-TTLL3	SSCAGC
3	9986829	-	122.368	-0.0910251	0.985981	EMC3	VARR
3	9986841	-	103.467	-0.658458	0.973398	EMC3	VARR
3	10321093	-	123.958	0.331757	0.992366	SEC13	BA
3	12557087	+	186.491	-0.324209	0.929825	MKRN2	VARR
3	12841509	-	124.529	-0.0309859	0.997585	RPL32	SSCAGC
3	12841516	-	505.404	-0.288338	0.958071	RPL32	VARR
3	14125023	+	119.933	0.299258	0.962025	TMEM43	BA
3	14125054	+	116.337	-0.336168	0.975309	TMEM43	BBCABW
3	14178601	-	132.8	-0.0879831	0.977695	XPC	BBCABW
3	14178849	+	156.061	-0.0664055	0.954495	LSM3	VARR
3	14178857	+	147.156	0.249404	0.961929	LSM3	VARR
3	14402621	+	324.025	-0.369651	0.956357	SLC6A6	BA
3	15601569	-	344.437	-0.100333	0.986411	HACL1	BA
3	16264937	-	197.918	0.184773	0.977901	DPH3	BA
3	23805955	+	297.41	0.536435	0.946594	UBE2E1	BBCABW
3	23917120	+	103.792	0.31656	0.933265	RPL15	VARR
3	23917127	+	402.317	0.099953	0.963374	RPL15	BBCABW
3	23917135	+	255.542	-0.00819653	0.929313	RPL15	BA
3	23917138	+	643.751	0.089521	0.959396	RPL15	BA
3	23917140	+	423.804	-0.149307	0.962774	RPL15	BA
3	23917165	+	157.841	-0.436865	0.970397	RPL15	SSCAGC
3	23917176	+	115.179	-0.453378	0.95866	RPL15	BA
3	27484384	-	243.186	0.488712	0.947947	SLC4A7	BBCABW
3	32502810	-	117.649	-0.443828	0.964497	CMTM6	BA
3	33097146	-	163.297	-0.375849	0.983291	GLB1	BA
3	33798630	+	200.536	-0.66515	0.969774	PDCD6IP	BBCABW
3	33798634	+	210.726	-0.55752	0.961911	PDCD6IP	BBCABW
3	36993518	+	133.719	-0.109353	0.991277	MLH1	BA
3	38137077	-	129.388	0.20047	0.976759	ACAA1	BBCABW
3	38137089	-	136.544	-0.4836	0.973333	ACAA1	BA
3	40457308	+	187.853	-0.305384	0.967078	RPL14	BA
3	40457310	+	234.435	0.140755	0.971616	RPL14	BA
3	40457349	+	120.877	0.382621	0.98065	RPL14	BA
3	41199505	+	1918.32	0.363347	0.962834	CTNNB1	BA
3	48609659	-	120.614	-0.30355	0.963855	UQCRC1	BA
3	48609664	-	179.949	-0.671096	0.992362	UQCRC1	BBCABW
3	49007387	+	176.807	-0.7147	0.993031	WDR6	BA
3	49007399	+	258.841	-0.27193	1	WDR6	BA
3	49007423	+	148.237	0.316271	0.945265	WDR6	VARR
3	49104752	-	124.635	-1.03648	0.992606	QARS1	BA
3	49133046	-	101.742	0.0180282	0.929825	LAMB2	VARR
3	49358325	-	872.962	-0.0111005	0.968699	GPX1	BA
3	49358353	-	117.847	0.167015	0.915146	GPX1	BA
3	49412094	-	237.576	0.0339357	0.93523	RHOA	BA
3	50088954	+	118.554	-0.368888	0.950069	RBM5	BBCABW
3	50236204	+	476.212	-0.694885	0.985024	GNAI2	BBCABW
3	50292429	-	244.172	-0.317181	0.941885	IFRD2	VARR
3	51995923	-	148.691	0.69853	0.836576	RPL29	BA
3	51995951	-	355.751	-0.0832295	0.968215	RPL29	BBCABW
3	52278646	-	344.088	-0.470954	0.976572	WDR82	BA
3	52536605	+	353.4	-0.416662	0.98141	UQCC5	BBCABW
3	52686032	+	2384.27	-0.0777015	0.962425	GNL3	BBCABW
3	52706112	+	331.448	-0.0990803	0.993289	SPCS1	BA
3	52706129	+	103.866	-0.0685672	0.97973	SPCS1	BA
3	53255987	-	556.49	-1.04611	0.977972	TKT	BA
3	53255994	-	178.213	-1.17149	0.97607	TKT	BA
3	53256016	-	1584.42	-0.649717	0.983307	TKT	SSCAGC
3	53256047	-	103.128	0.157083	1	TKT	BA
3	57597344	-	823.859	-0.0332749	0.964314	ARF4	BBCABW
3	57597371	-	165.305	0.00406294	0.936709	ARF4	BA
3	57597378	-	298.683	-0.267888	0.961652	ARF4	BA
3	57756309	+	142.061	-0.208376	0.955745	SLMAP	BBCABW
3	58008422	+	3364.5	-0.381012	0.93689	FLNB	BA
3	58433818	-	107.317	0.65069	0.970732	PDHB	BA
3	58526766	-	124.304	1.06334	0.977974	ACOX2	BA
3	66221012	+	106.555	0.49278	0.953125	SLC25A26	VARR
3	69085023	+	193.717	-0.135245	0.941651	ARL6IP5	VARR
3	69085036	+	125.982	-0.196352	0.937656	ARL6IP5	VARR
3	87227285	+	203.048	0.159109	0.986395	CHMP2B	BA
3	87227300	+	176.668	0.357575	0.93261	CHMP2B	VARR
3	87227312	+	489.678	0.333923	0.96721	CHMP2B	BA
3	98901682	-	484.719	0.586353	0.950884	DCBLD2	SSCAGC
3	98901165	-	112.979	-0.0904002	0.910785	DCBLD2	BA
3	99817862	+	311.681	0.343177	0.9845	CMSS1	BA
3	100260995	+	114.453	0.00381617	0.979695	TBC1D23	VARR
3	100334757	+	309.588	-0.273405	0.985405	NIT2	BBCABW
3	100709505	+	115.801	-0.20185	0.936508	TFG	BA
3	100709516	+	172.334	0.120926	0.964602	TFG	BA
3	100709518	+	249.853	-0.191339	0.968992	TFG	VARR
3	101677132	-	123.523	0.0572663	0.953052	ZBTB11	BBCABW
3	101686705	-	1208.64	-0.375282	0.9908	RPL24	BA
3	101779664	+	118.249	0.650028	0.918033	NXPE3	BBCABW
3	105366909	+	112.916	-0.40118	0.945455	ALCAM	BA
3	108589431	-	114.046	-0.0667209	0.95	CIP2A	BA
3	111859265	+	121.902	-1.39946	0.804762	PHLDB2	BA
3	112641143	-	121.354	-0.12445	0.955	CCDC80	BA
3	113746241	-	396.626	0.256969	0.950595	NAA50	BBCABW
3	113747037	+	131.957	0.0739089	0.97619	ATP6V1A	BA
3	119240878	-	687.613	-1.46822	0.914679	B4GALT4	BBCABW
3	119463614	-	128.147	-0.683712	0.961165	TMEM39A	BA
3	119498552	+	140.014	-0.0822267	0.914286	TIMMDC1	BA
3	119498567	+	232.151	0.0121161	0.969072	TIMMDC1	VARR
3	119677380	-	166.503	-0.523718	0.980672	COX17	BA
3	119677387	-	155.023	-0.418211	0.958513	COX17	BA
3	119677406	-	289.646	0.0399424	0.987415	COX17	BA
3	119677413	-	145.068	0.0809008	0.941535	COX17	BA
3	120349354	-	216.222	-0.405885	0.972477	LRRC58	BBCABW
3	120596322	+	985.146	-0.0467434	0.990864	NDUFB4	BA
3	120596332	+	502.642	-0.0496272	0.93477	NDUFB4	VARR
3	120596338	+	980.554	-0.121258	0.970689	NDUFB4	BA
3	120596339	+	119.126	0.00156484	0.962613	NDUFB4	BA
3	122384182	+	168.015	0.334968	0.989691	FAM162A	BBCABW
3	122514937	-	267.599	-0.0386135	0.977654	KPNA1	BBCABW
3	124730453	+	523.135	0.177528	0.969272	UMPS	VARR
3	124730457	+	100.575	0.31428	0.952096	UMPS	VARR
3	124887365	-	269.063	0.00354883	0.977154	ITGB5	BA
3	127598410	+	588.822	0.096552	0.958994	MCM2	BA
3	128052431	+	137.901	-0.0514029	1	SEC61A1	BA
3	128052434	+	238.994	0.063585	0.900552	SEC61A1	BA
3	128123800	-	103.631	-0.0128246	0.96413	RUVBL1	BA
3	128123809	-	145.586	0.423015	0.976575	RUVBL1	BA
3	128123812	-	262.676	0.054879	0.976309	RUVBL1	BA
3	128123822	-	256.065	-0.0711947	0.966483	RUVBL1	VARR
3	128650816	-	845.902	0.0551742	0.977597	RPN1	BBCABW
3	128650830	-	227.153	-0.263508	0.965753	RPN1	BA
3	128726183	+	191.29	0.00973937	0.971199	RAB7A	BA
3	128879620	+	113.65	-0.32936	0.97561	ACAD9	BA
3	128879623	+	147.649	-0.359599	0.972477	ACAD9	VARR
3	129183892	-	518.486	-0.254951	0.961814	CNBP	BA
3	129183908	-	167.119	-0.544986	0.871256	CNBP	BA
3	129249606	+	467.835	-0.443145	0.953488	COPG1	BBCABW
3	129249632	+	394.846	-0.263519	0.995826	COPG1	BA
3	129249638	+	113.941	0.0905725	0.936364	COPG1	BA
3	129316286	-	1696.93	-0.545839	0.935639	H1-10	BA
3	131502936	-	139.025	0.0295846	0.954955	MRPL3	BBCABW
3	131502969	-	470.652	-0.119058	0.98784	MRPL3	BA
3	132417517	+	100.439	0.186025	0.990654	DNAJC13	VARR
3	133573714	+	320.464	-0.724275	0.968689	CDV3	BA
3	133805845	+	195.722	0.327258	0.96732	SRPRB	BA
3	134374447	-	359.03	-0.696733	0.934615	AMOTL2	BA
3	136752378	-	124.153	-0.279442	0.875741	STAG1	BBCABW
3	139389643	-	357.352	-0.0583802	0.963625	COPB2	BBCABW
3	139389648	-	145.115	0.0696349	0.647404	COPB2	BA
3	141738305	+	296.491	0.344195	0.983871	RNF7	VARR
3	141876643	+	2409.4	-0.134119	0.968722	ATP1B3	BBCABW
3	143001619	+	200.905	-0.0655396	0.960938	U2SURP	VARR
3	149377649	-	1273.94	-0.470534	0.786859	TM4SF1	BA
3	149658025	-	239.543	-0.275508	0.908425	WWTR1	BA
3	149658027	-	152.404	-0.233236	0.85034	WWTR1	BA
3	149658043	-	106.795	-0.0428971	0.935743	WWTR1	VARR
3	150546496	-	194.664	-0.504082	0.975109	SERP1	BA
3	150546501	-	182.46	0.176025	0.956513	SERP1	VARR
3	150546526	-	188.516	0.277726	0.909091	SERP1	BA
3	150603294	+	177.577	0.182647	0.977419	SELENOT	BA
3	150603323	+	284.255	0.0905031	0.967236	SELENOT	BBCABW
3	152268891	+	116.186	-0.0879151	0.944056	MBNL1	BA
3	152268929	+	233.523	0.517415	0.940249	MBNL1	BA
3	154324462	-	175.954	0.36376	0.920477	DHX36	BBCABW
3	154324487	-	168.378	0.0535943	0.946674	DHX36	BBCABW
3	155870650	+	205.689	-0.205031	0.966387	GMPS	SSCAGC
3	156555119	-	198.523	0.0275169	0.94012	SSR3	BA
3	156555151	-	150.723	0.379728	0.53012	SSR3	VARR
3	157160147	-	278.567	-0.709093	0.953646	CCNL1	BA
3	158110089	+	142.339	-0.576841	0.99318	RSRC1	BA
3	160399216	-	101.49	-0.230369	0.985342	IFT80	BA
3	160399650	+	472.779	0.190158	0.95155	SMC4	BBCABW
3	160565571	-	761.893	-0.155267	0.982572	KPNA4	BA
3	172750726	+	253.341	-0.0767122	0.946768	ECT2	BA
3	179347709	+	115.071	-0.0451466	0.973451	MFN1	BBCABW
3	179347735	+	167.597	0.275667	0.968904	MFN1	BA
3	179604634	-	149.786	-0.00859679	0.961709	MRPL47	BA
3	179604638	-	563.801	-0.0862018	0.967861	MRPL47	BBCABW
3	179604809	+	124.382	0.0659896	0.970343	NDUFB5	BA
3	184174855	+	278.782	0.117219	0.972603	AP2M1	BBCABW
3	184174905	+	120.491	-0.134554	0.96875	AP2M1	BA
3	184248962	-	159.819	-0.24331	0.979022	ALG3	BBCABW
3	184314590	+	109.895	-0.160281	0.980387	EIF4G1	BA
3	185499035	-	185.084	-0.186554	0.959016	TMEM41A	BBCABW
3	185937987	-	980.755	-0.131913	0.957619	TRA2B	BA
3	185938014	-	602.6	-0.509374	0.968867	TRA2B	BA
3	185938029	-	160.158	0.205049	0.933761	TRA2B	BBCABW
3	186109089	-	387.92	0.0246349	0.979342	ETV5	BA
3	186242678	-	100.766	-0.45062	0.987683	DGKG	BA
3	187139499	-	112.144	0.0305144	0.985714	RPL39L	BA
3	194136145	+	175.804	-0.697318	0.959345	HES1	BA
3	194136148	+	303.864	-0.50315	0.851774	HES1	BA
3	196082090	-	860.257	0.16792	0.98632	TFRC	BA
3	196942526	-	109.949	-0.402843	0.970545	NCBP2	BBCABW
3	197950198	+	797.697	-0.211926	0.907534	RPL35A	BA
3	197950204	+	420.351	-0.446256	0.989855	RPL35A	BA
4	1289894	+	256.95	0.0739811	0.961603	MAEA	BA
4	1712319	-	235.619	-0.273712	0.967643	SLBP	BA
4	2041995	+	202.916	-0.00458191	0.933333	C4orf48	BA
4	3532420	-	213.54	0.247847	0.925926	LRPAP1	BA
4	4290146	-	203.332	0.00793189	0.944444	LYAR	BA
4	4290154	-	117.31	-0.115592	0.992268	LYAR	BA
4	6640685	+	1971.77	0.258166	0.962932	MRFAP1	BBCABW
4	6693878	+	676.695	0.450985	0.952988	S100P	BA
4	6693880	+	854.621	0.271789	0.932455	S100P	BA
4	7068075	-	174.879	0.0734643	0.928571	GRPEL1	BA
4	10116760	-	233.902	-0.67527	0.95671	WDR1	BBCABW
4	10116794	-	875.231	-0.213802	0.972431	WDR1	BBCABW
4	10116799	-	480.589	-0.359854	0.97807	WDR1	BBCABW
4	24584539	-	110.583	0.118004	0.937468	DHX15	BBCABW
4	25234033	+	123.469	-0.23284	0.976	PI4K2B	VARR
4	37686376	-	101.177	-0.219174	0.956522	RELL1	BBCABW
4	38867778	+	214.34	-0.235309	0.983871	FAM114A1	BA
4	39458922	-	2556.65	0.0411549	0.987378	RPL9	VARR
4	39458898	-	122.772	-0.204942	0.923889	RPL9	BA
4	39458935	-	130.334	0.205496	0.970428	RPL9	BA
4	39458941	-	136.405	-0.167471	0.972521	RPL9	BA
4	39458948	-	221.919	0.123025	0.967655	RPL9	BA
4	39527440	-	125.216	0.461416	0.867265	UGDH	BA
4	39698139	+	129.033	0.00866999	0.943241	UBE2K	BBCABW
4	41256928	+	4884.44	-0.537454	0.997191	UCHL1	BA
4	41360807	+	131.587	-1.4941	0.930556	LIMCH1	BA
4	41935137	+	221.11	-0.24107	0.981283	TMEM33	BA
4	41935152	+	331.936	0.261147	0.976106	TMEM33	BA
4	41990530	+	211.97	0.153807	0.976159	SLC30A9	VARR
4	41990534	+	108.519	-0.30656	0.9935	SLC30A9	SSCAGC
4	56436138	+	175.991	-0.0819715	0.993464	PAICS	BBCABW
4	56436260	+	1093.16	0.0429131	0.98797	PAICS	BA
4	56436262	+	135.77	0.219215	0.962441	PAICS	BA
4	56436291	+	157.574	-0.225427	0.969027	PAICS	SSCAGC
4	56467633	+	133.983	0.599109	0.961263	SRP72	VARR
4	56978896	+	411.017	0.0526079	0.950599	POLR2B	BA
4	57110385	-	1022.23	-1.1682	0.972369	IGFBP7	BBCABW
4	70688532	+	121.412	-0.165257	0.975415	UTP3	BBCABW
4	70839890	-	1965.3	0.0309274	0.97084	GRSF1	BBCABW
4	73998677	-	324.348	-0.90197	0.809344	CXCL5	BBCABW
4	74365145	+	1721.17	0.519008	0.861331	EREG	BBCABW
4	74445136	+	950.338	0.017901	0.953678	AREG	VARR
4	75514473	+	162.887	0.160023	0.979646	THAP6	BA
4	75673412	-	514.213	0.152275	0.965888	G3BP2	BA
4	76213824	-	115.721	-0.32915	0.925373	SCARB2	BBCABW
4	77862832	+	106.99	0.676128	0.953658	MRPL1	BA
4	78551770	+	179.3	-1.34717	0.65035	ANXA3	SSCAGC
4	83035201	+	121.843	-0.588939	1	COPS4	BA
4	83284795	-	154.197	-0.23886	1	COQ2	BA
4	87975711	+	292.72	0.281034	0.988506	SPP1	BA
4	87975714	+	3010.62	0.456167	0.966881	SPP1	BA
4	87975717	+	176.181	0.299945	0.934853	SPP1	BA
4	88523705	-	149.187	-0.178058	0.970443	PYURF	BA
4	88523746	-	123.752	0.325604	0.924528	PYURF	BA
4	88523755	-	280.17	0.0612588	0.984615	PYURF	BA
4	94451942	+	298.466	-0.423752	0.943186	PDLIM5	BBCABW
4	98929125	-	347.956	-0.100404	0.974288	EIF4E	VARR
4	99088710	-	113.304	0.388367	0.974852	ADH5	BA
4	99088713	-	1059.94	-0.101718	0.99023	ADH5	VARR
4	99088730	-	231.838	-0.388146	0.991107	ADH5	BA
4	99950273	-	912.639	-0.120686	0.960824	H2AZ1	BBCABW
4	99950278	-	280.152	-0.134853	0.980666	H2AZ1	BA
4	102827551	-	337.199	-0.0574059	0.916147	UBE2D3	BA
4	105474059	-	693.797	0.458132	0.983234	PPA2	BBCABW
4	105474068	-	105.618	0.383182	0.962963	PPA2	VARR
4	106316517	+	193.759	0.149552	0.941472	AIMP1	BBCABW
4	108620588	+	174.81	-0.039063	0.972414	RPL34	BA
4	108650610	+	107.451	0.0245754	0.948936	OSTC	VARR
4	108650626	+	173.519	-0.0743295	0.700787	OSTC	VARR
4	109815525	+	266.078	-0.352743	0.931237	GAR1	BBCABW
4	119212713	+	119.493	-0.0869681	0.929682	USP53	BBCABW
4	119300617	-	196.505	-0.775484	0.961944	C4orf3	BBCABW
4	119300626	-	156.734	-0.463226	0.945161	C4orf3	BA
4	120066827	-	124.793	0.218179	0.937295	MAD2L1	BA
4	121696975	-	207.588	-1.02396	0.944212	ANXA5	BA
4	121696980	-	640	-0.596735	0.958827	ANXA5	BA
4	122826834	+	150.768	-0.248088	0.979433	FGF2	BA
4	127782322	+	100.361	0.465291	0.964844	HSPA4L	BBCABW
4	139015781	+	318.014	-0.139769	0.972222	NOCT	VARR
4	139301500	+	158.621	0.0677471	0.935961	NAA15	BBCABW
4	139301527	+	167.857	-0.332676	0.964775	NAA15	BBCABW
4	139556219	-	110.402	0.355564	0.983607	SETD7	BA
4	140373649	+	125.943	-0.548214	0.961496	SCOC	BBCABW
4	141220903	+	127.378	0.116832	0.946565	ZNF330	BA
4	145098311	+	635.214	-0.215549	0.852564	ABCE1	BA
4	145098317	+	135.865	0.016373	0.91529	ABCE1	BBCABW
4	151099602	+	140.844	0.299137	0.964997	RPS3A	BA
4	151099621	+	1770.19	0.181549	0.971969	RPS3A	BBCABW
4	154550421	-	182.057	0.223016	0.977846	PLRG1	BA
4	154590742	-	102.495	-2.16333	0.902991	FGA	BA
4	158723392	-	146.001	0.0686126	0.958763	PPID	BA
4	163494690	+	199.687	-0.079033	0.966418	TMA16	VARR
4	165327686	+	114.464	-0.216324	0.975155	MSMO1	VARR
4	173334353	-	577.346	-0.395207	0.948694	HMGB2	BA
4	173334358	-	404.602	-0.43894	0.956347	HMGB2	BA
4	174522487	-	575.145	0.678216	0.960699	HPGD	BA
4	176319988	+	124.883	-0.027568	1	SPCS3	BA
4	177309874	+	250.315	-1.57007	0.9107	NEIL3	BBCABW
4	184649447	-	103.027	0.10244	0.945394	CASP3	BA
4	188109603	-	917.413	0.882392	0.895532	TRIML2	BA
5	218153	-	242.581	-0.320927	0.974359	CCDC127	VARR
5	271624	+	313.381	-0.08173	0.932836	PDCD6	BA
5	271646	+	530.071	-0.0988199	0.984177	PDCD6	BA
5	1799837	-	156.881	0.273708	0.900642	MRPL36	BBCABW
5	1801400	+	606.054	0.0102134	0.969849	NDUFS6	VARR
5	1801407	+	656.009	-0.217916	0.985416	NDUFS6	SSCAGC
5	1801415	+	643.65	0.320358	0.968463	NDUFS6	VARR
5	10250276	+	101.004	-0.0728721	0.942553	CCT5	VARR
5	10250282	+	800.529	0.00628022	0.96385	CCT5	BBCABW
5	10250296	+	342.633	-0.193348	0.987584	CCT5	BA
5	10250320	+	104.514	-0.260781	0.954202	CCT5	BA
5	10250323	+	410.382	0.175078	0.958796	CCT5	BA
5	10353892	+	132.114	0.230641	0.981907	MARCHF6	BA
5	16465800	-	308.084	0.144615	0.943112	ZNF622	BBCABW
5	17217631	+	2489.26	-0.142708	0.916114	BASP1	BBCABW
5	17217634	+	480.32	0.0436995	0.919732	BASP1	BA
5	32585557	+	3251.78	0.0730796	0.970872	SUB1	BBCABW
5	32585574	+	600.684	-0.269496	0.986046	SUB1	BBCABW
5	32710649	+	166.344	-1.01285	0.917127	NPR3	BBCABW
5	33440971	+	166.045	-0.550211	0.989605	TARS1	BA
5	33440993	+	355.111	0.34419	0.966713	TARS1	VARR
5	33441019	+	106.445	0.147621	0.970732	TARS1	BA
5	34915504	-	315.761	-0.069289	0.954442	RAD1	BBCABW
5	40798177	-	182.432	-0.355993	0.945783	PRKAA1	BBCABW
5	40835194	-	704.67	-0.153593	0.969957	RPL37	BA
5	40835238	-	199.849	0.184683	0.960429	RPL37	BA
5	41904336	+	109.872	0.416525	0.961538	RIMOC1	BA
5	44808959	+	153.969	0.0731072	0.918605	MRPS30	VARR
5	53109754	-	184.282	-0.218741	0.972168	MOCS2	BA
5	53560639	+	952.773	-0.359574	0.994518	NDUFS4	BA
5	55160180	+	354.303	0.197438	0.98555	GPX8	BA
5	55307989	+	177.626	-0.20717	0.985517	MTREX	VARR
5	55308001	+	396.829	0.0698857	0.96971	MTREX	BBCABW
5	58460084	-	662.299	0.188016	0.868567	PLK2	BBCABW
5	60700134	-	286.353	-0.0667754	0.98913	DEPDC1B	BA
5	61332258	+	193.65	-0.066982	0.968556	ZSWIM6	BA
5	62403882	-	188.891	0.580805	0.985221	DIMT1	BA
5	65563149	-	172.507	0.255676	0.856538	CENPK	VARR
5	65722247	+	181.574	-0.423511	0.932203	NLN	VARR
5	69189574	+	112.906	-0.230817	0.973995	CENPH	VARR
5	69217808	+	367.706	-0.0817665	0.987177	MRPS36	VARR
5	69369490	-	256.741	-0.213859	0.952381	TAF9	BA
5	69369528	-	254.619	-0.103798	0.957576	TAF9	BA
5	72320224	-	161.619	0.58959	0.955048	MRPS27	VARR
5	72320231	-	250.355	0.136852	0.959302	MRPS27	BA
5	72816672	+	103.217	-0.0763621	0.911765	TNPO1	BBCABW
5	72848126	+	114.819	-0.539949	0.942935	TNPO1	BBCABW
5	72848167	+	138.63	-0.618792	0.973282	TNPO1	BA
5	72848170	+	246.764	-0.528034	0.982524	TNPO1	BA
5	72848173	+	635.772	-0.241786	0.95272	TNPO1	VARR
5	73498431	+	410.467	0.109847	0.967151	BTF3	BBCABW
5	73498448	+	3798.25	-0.139337	0.990343	BTF3	BA
5	73498455	+	754.435	-0.171899	0.970194	BTF3	BA
5	73565743	+	268.395	-0.0027267	0.987374	UTP15	BA
5	74685233	+	127.056	-0.0575462	0.978814	HEXB	BA
5	74767241	+	229.574	0.0381629	0.984518	NSA2	BA
5	74767249	+	123.036	0.135246	0.978707	NSA2	BA
5	76623380	-	235.756	-0.918256	0.90051	F2RL2	VARR
5	76819059	+	443.209	0.0502208	0.931034	F2RL1	SSCAGC
5	77776306	-	329.539	0.213062	0.924198	TBCA	BA
5	77776327	-	120.6	-0.315522	0.985185	TBCA	SSCAGC
5	77776333	-	245.734	-0.0277997	0.987654	TBCA	BA
5	77776335	-	103.964	-0.32553	0.874317	TBCA	BA
5	77776337	-	681.741	0.179514	0.977824	TBCA	BA
5	81301587	+	112.737	0.0500811	0.972414	ZCCHC9	BBCABW
5	81301607	+	126.901	-0.182015	0.925651	ZCCHC9	BA
5	81301618	+	106.754	-0.0688717	0.905473	ZCCHC9	VARR
5	82278343	-	172.699	-0.278861	0.877776	RPS23	VARR
5	83077385	-	108.582	-0.0508596	0.960251	TMEM167A	BA
5	83077394	-	106.254	-0.110665	0.981013	TMEM167A	BA
5	86617928	+	556.619	0.330797	0.96851	COX7C	BBCABW
5	86617935	+	325.538	-0.228621	0.970436	COX7C	BA
5	86617947	+	1391.68	0.315782	0.958115	COX7C	BBCABW
5	86617965	+	123.596	0.545502	0.982442	COX7C	BA
5	86617968	+	790.109	1.08817	0.97452	COX7C	VARR
5	86617977	+	114.516	0.0384713	0.796085	COX7C	VARR
5	86618010	+	101.138	0.0450192	0.749127	COX7C	BA
5	95081645	-	115.947	-0.717546	0.956696	MCTP1	BBCABW
5	95554977	-	101.254	-0.482069	0.973552	SKIC3	BBCABW
5	95822722	-	263.168	-0.456497	0.935579	GLRX	BA
5	97183288	-	124.372	-0.223813	0.974684	RIOK2	BA
5	112922224	-	121.567	-0.150713	0.970149	REEP5	BA
5	112922227	-	615.095	-0.0802874	0.981128	REEP5	BBCABW
5	112922239	-	187.027	0.22535	0.975836	REEP5	BBCABW
5	112922251	-	154.658	0.0535675	0.941748	REEP5	BBCABW
5	116085025	+	115.107	-0.213008	0.971963	COMMD10	VARR
5	116085035	+	120.807	-0.124684	0.973301	COMMD10	BBCABW
5	119452497	+	118.545	-0.00416752	0.988019	HSD17B4	BBCABW
5	122845613	+	110.567	-0.654636	0.963964	SNX24	BA
5	126595198	-	254.064	-0.376953	0.942344	ALDH7A1	BA
5	126595219	-	419.75	-0.132136	0.978878	ALDH7A1	BA
5	126600947	+	115.936	-0.0655975	0.966759	PHAX	SSCAGC
5	126777160	+	188.342	-0.406949	0.943114	LMNB1	VARR
5	127517640	+	121.537	-0.293767	0.984704	PRRC1	BA
5	128083766	+	367.411	0.505677	0.949303	SLC12A2	BBCABW
5	131165298	-	521.563	-0.174912	0.997589	HINT1	VARR
5	131165306	-	146.068	-0.354981	0.9375	HINT1	BA
5	131165317	-	129.78	-0.358812	0.966292	HINT1	BA
5	132556977	+	143.986	-0.39299	0.953421	RAD50	BA
5	132866640	+	358.361	0.011574	0.976544	UQCRQ	BA
5	132866643	+	141.797	-0.412156	0.958549	UQCRQ	BA
5	132866651	+	2095.64	0.175227	0.982518	UQCRQ	BA
5	133051949	+	339.332	-0.189577	0.98893	HSPA4	VARR
5	133052034	+	541.423	-0.0684473	0.984375	HSPA4	BA
5	133968630	-	231.994	-0.27337	0.813559	C5orf15	BA
5	134176972	-	293.67	0.071503	0.994536	SKP1	VARR
5	134176977	-	819.83	0.292814	0.969789	SKP1	BA
5	134226071	-	318.397	-0.088972	0.94386	PPP2CA	VARR
5	134226073	-	363.765	0.197085	0.947674	PPP2CA	BA
5	134226076	-	167.849	0.0414164	0.962828	PPP2CA	BBCABW
5	134411881	-	226.435	-0.224906	0.97191	CDKN2AIPNL	BA
5	134632809	-	144.065	0.178562	0.969925	SAR1B	BA
5	136028953	+	112.843	-0.170867	1	TGFBI	SSCAGC
5	136028958	+	338.834	-0.596752	0.968137	TGFBI	BA
5	136028962	+	177.8	-0.55903	0.974684	TGFBI	BA
5	136028991	+	4620.54	-0.70942	0.9441	TGFBI	BBCABW
5	136132845	+	107.166	-0.352412	0.977273	SMAD5	BA
5	138178630	-	104.525	-0.289979	0.985294	BRD8	VARR
5	138179169	+	247.561	-0.814786	0.975921	KIF20A	BBCABW
5	138338266	+	161.317	0.0898187	0.965517	FAM53C	BA
5	138543209	-	121.028	0.114184	0.971098	ETF1	BA
5	138543233	-	165.763	0.0916947	0.969805	ETF1	BBCABW
5	138575374	-	147.618	-0.784242	0.981945	HSPA9	SSCAGC
5	138575381	-	135.319	-0.314823	0.992093	HSPA9	BA
5	138575386	-	130.404	-0.149586	0.967532	HSPA9	BA
5	138575399	-	273.614	-0.263526	0.887097	HSPA9	VARR
5	138575401	-	2226.68	0.0246529	0.976767	HSPA9	BA
5	138575419	-	363.456	0.361885	0.953057	HSPA9	BA
5	138753420	+	488.043	-0.153249	0.982063	CTNNA1	BBCABW
5	138753448	+	284.979	-0.251383	0.977074	CTNNA1	VARR
5	138753450	+	133.148	0.0676334	0.96166	CTNNA1	BA
5	138753452	+	235.063	0.146695	0.867368	CTNNA1	VARR
5	139293743	+	222.473	-0.315129	0.97497	MATR3	BA
5	140175188	+	358.015	-0.191877	0.959956	CYSTM1	BBCABW
5	140303086	-	304.202	-0.00216654	0.949767	PFDN1	BA
5	140303094	-	152.13	-0.171046	0.956897	PFDN1	VARR
5	140564828	+	398.352	0.298079	0.98042	SLC35A4	VARR
5	140647628	-	261.481	-0.307806	0.954787	NDUFA2	BA
5	140647831	+	120.869	-0.0973652	0.951725	IK	BBCABW
5	140664853	+	181.097	0.171102	0.937742	WDR55	BBCABW
5	140691370	-	199.599	0.0824674	0.982456	HARS1	BA
5	140700447	+	1350.44	0.083349	0.959803	ZMAT2	BBCABW
5	141320784	-	394.106	0.159869	0.94794	TAF7	BA
5	146182603	-	118.25	-0.0303659	0.979381	LARS1	BA
5	146182623	-	144.974	-0.0686898	0.956306	LARS1	VARR
5	149551391	-	131.886	0.133995	0.922097	CSNK1A1	BBCABW
5	150449742	-	880.131	0.0109084	0.981426	RPS14	BBCABW
5	150701062	-	150.263	-0.547133	0.939726	RBM22	BA
5	151020591	+	213.924	-1.89412	0.983607	GPX3	BA
5	151081034	-	121.122	-0.330403	0.936364	TNIP1	BBCABW
5	154938199	-	150.416	-0.18324	0.967337	GEMIN5	BA
5	159263290	+	409.029	0.309168	0.951786	UBLCP1	BBCABW
5	160419081	-	169.981	0.377311	0.953932	SLU7	BA
5	160421829	+	246.247	-0.131488	0.980765	PTTG1	BA
5	160421834	+	288.251	0.169031	0.976417	PTTG1	VARR
5	160421855	+	1020.49	-0.235474	0.977376	PTTG1	BA
5	160421866	+	574.079	-0.321584	0.979324	PTTG1	BA
5	163460632	+	256.438	0.180192	0.946042	HMMR	BA
5	163460639	+	127.977	-0.675918	0.954988	HMMR	BBCABW
5	163460643	+	303.704	-0.381639	0.962836	HMMR	BBCABW
5	163460660	+	133.235	-0.218491	0.973863	HMMR	BBCABW
5	168486471	+	631.376	-0.0936265	0.955153	RARS1	BBCABW
5	169583773	+	114.028	-0.441419	0.945148	SPDL1	BA
5	169583784	+	166.78	-0.0782974	0.961538	SPDL1	BA
5	172959424	+	559.248	-0.373511	0.971968	RPL26L1	BBCABW
5	172959440	+	264.132	-0.364582	0.9678	RPL26L1	BBCABW
5	172983773	+	270.796	-0.803589	0.942139	ATP6V0E1	BBCABW
5	172983775	+	127.114	0.421831	0.849206	ATP6V0E1	BA
5	172983796	+	285.243	-0.0383808	0.96351	ATP6V0E1	BA
5	172983800	+	356.009	-0.282249	0.93617	ATP6V0E1	BA
5	172983802	+	470.993	-0.097693	0.943665	ATP6V0E1	BA
5	175871578	+	253.955	-0.596598	0.940541	CPLX2	BA
5	176361785	-	115.398	-0.195884	0.988889	KIAA1191	BBCABW
5	176361791	-	331.533	0.0577797	0.974729	KIAA1191	BA
5	176361798	-	166.295	-0.129829	0.975155	KIAA1191	VARR
5	176388580	-	201.501	-0.0227534	0.924892	NOP16	VARR
5	176388598	-	569.766	0.0442471	0.950838	NOP16	BA
5	176388737	+	126.648	-0.35129	0.978659	HIGD2A	BA
5	176388758	+	209.731	-0.218155	0.943593	HIGD2A	BA
5	176388761	+	216.219	-0.456882	0.981013	HIGD2A	BA
5	176416578	-	162.14	0.158731	0.923077	CLTB	BBCABW
5	177086914	+	130.089	-0.98682	0.981818	FGFR4	BA
5	177303811	+	167.696	0.280847	0.963616	PRELID1	BA
5	177473624	-	126.01	0.0729899	0.956143	DBN1	BA
5	177497601	-	638.427	-0.442671	0.990196	PDLIM7	BA
5	177592199	+	137.266	-0.447354	0.996216	TMED9	VARR
5	177592203	+	435.847	-0.458832	0.987203	TMED9	VARR
5	178153864	-	225.464	-0.278382	0.866667	NHP2	BA
5	178153874	-	382.561	-0.123001	0.970383	NHP2	BA
5	178153884	-	456.918	0.132772	0.980756	NHP2	BA
5	178153885	-	574.183	0.124571	0.975738	NHP2	VARR
5	178204533	+	4910.23	-0.113046	0.942052	HNRNPAB	VARR
5	179623670	-	2644.21	0.0846846	0.962198	HNRNPH1	BBCABW
5	179698927	+	142.031	-0.0566882	0.984772	CANX	BBCABW
5	179698967	+	742.115	-0.0928213	0.975554	CANX	SSCAGC
5	179698978	+	102.371	-0.0641073	0.894191	CANX	VARR
5	179806866	-	153.461	0.107385	0.963982	MGAT4B	BBCABW
5	179820905	+	27257.1	0.401621	0.880161	SQSTM1	BA
5	181243845	-	391.128	-0.589382	0.965035	RACK1	BBCABW
5	181243863	-	113.471	-0.511608	0.960131	RACK1	BA
5	181243897	-	1471.52	-0.319447	0.955619	RACK1	BBCABW
6	2999878	+	102.487	0.0469463	0.698413	NQO2	BBCABW
6	2999896	+	170.502	-0.169378	0.975309	NQO2	VARR
6	3157544	-	540.463	0.222379	1	TUBB2A	VARR
6	4135575	-	263.872	-0.706255	0.978768	ECI2	BA
6	7313182	-	260.005	-0.548452	0.977011	SSR1	BBCABW
6	7910788	-	166.691	0.105948	0.962264	TXNDC5	SSCAGC
6	8102539	-	176.644	-0.146888	0.97065	EEF1E1	VARR
6	10694972	+	116.054	-0.031253	0.957436	PAK1IP1	BA
6	10723113	+	107.456	-0.669105	0.993671	TMEM14C	VARR
6	10723168	+	381.161	-0.118624	0.974929	TMEM14C	BBCABW
6	10723191	+	168.138	-0.0444482	0.968208	TMEM14C	BBCABW
6	10747794	+	165.419	-0.206713	0.965517	ENSG00000272162	SSCAGC
6	10747801	+	379.905	-0.203017	0.960716	TMEM14B	BA
6	10747805	+	505.032	-0.0445998	0.961177	TMEM14B	BA
6	10747819	+	148.457	-0.0896546	0.948276	TMEM14B	VARR
6	11232668	-	343.854	0.0349119	0.938545	NEDD9	BA
6	12290361	+	2867.37	-0.195476	0.86921	EDN1	BA
6	13615335	+	542.332	0.225407	0.970779	NOL7	BA
6	13615344	+	106.464	-0.178025	1	NOL7	BA
6	24402936	+	121.437	-0.0834017	0.969319	MRS2	BBCABW
6	24667077	+	208.283	-0.898409	0.972749	ACOT13	BBCABW
6	24667084	+	115.933	0.158431	0.972222	ACOT13	VARR
6	24774940	+	117.847	-0.260763	0.959619	GMNN	BBCABW
6	26020456	+	760.045	0.127037	0.837963	H3C1	BA
6	26021649	+	1579.59	0.17	0.774846	H4C1	BBCABW
6	26027281	-	612.611	0.163134	0.795505	H4C2	BA
6	26032097	-	944.289	0.305	0.881696	H3C2	VARR
6	26032099	-	23041	0.137036	0.763292	H3C2	BBCABW
6	26033616	-	2871.85	-0.0144083	0.704918	H2AC4	BA
6	26043711	-	2770.09	-0.273927	0.72038	H2BC3	BA
6	26045384	+	13385.4	-0.297279	0.731277	H3C3	BA
6	26045386	+	1396.94	-0.0251571	0.894039	H3C3	BA
6	26056470	-	13104.9	-0.0259199	0.855576	H1-2	BA
6	26103933	+	5564.75	-0.447815	0.873557	H4C3	BBCABW
6	26123923	-	504.509	-0.253282	0.876623	H2BC4	BA
6	26123925	-	444.891	-0.113763	0.857143	H2BC4	BA
6	26156331	+	624.994	0.0909905	0.632075	H1-4	BA
6	26158122	+	4115.32	-0.27108	0.883629	H2BC5	BA
6	26158125	+	6849.56	-0.0642742	0.852822	H2BC5	BA
6	26183756	+	251.136	-0.117366	0.886926	H2BC6	BA
6	26189110	-	3344.28	-0.14763	0.847004	H4C4	BA
6	26204610	+	3176.35	0.184646	0.922648	H4C5	BA
6	26224178	+	105.411	-0.0937497	0.956033	H3C6	BBCABW
6	26234987	-	8191.99	-0.169425	0.672294	H1-3	BA
6	26234989	-	6140.62	-0.298327	0.636799	H1-3	BA
6	26250635	-	4407.87	-0.263199	0.920498	H3C7	BBCABW
6	26272931	+	1396.88	-0.20973	0.960295	H2BC10	BA
6	26272934	+	2162.04	-0.110751	0.88715	H2BC10	BA
6	26285534	-	1054.29	0.0595856	0.831232	H4C8	BA
6	26457955	+	144.021	-0.139679	0.955752	BTN2A1	VARR
6	27132638	-	130.683	0.261222	0.910112	H2BC11	BA
6	27132795	-	11122.8	0.187294	0.920264	H2BC11	BA
6	27133038	+	915.838	-0.228007	0.891799	H2AC11	BBCABW
6	27139282	+	3870.23	-0.222624	0.855108	H4C9	VARR
6	27139284	+	234.222	-0.569487	0.739437	H4C9	BA
6	27146852	-	1590.49	0.240352	0.87159	H2BC12	BA
6	27146855	-	10226.4	0.162309	0.942153	H2BC12	BBCABW
6	27147106	+	27511.6	0.130971	0.842517	H2AC12	BA
6	27147112	+	209.989	-0.33994	0.806452	H2AC12	BBCABW
6	27808173	+	26457.4	-0.134327	0.885352	H2AC13	BBCABW
6	27810052	+	416.494	-0.00262284	0.719626	H3C10	VARR
6	27810053	+	202.028	-0.169658	0.565217	H3C10	BA
6	27814777	-	10243.4	-0.143335	0.890162	H2AC14	BBCABW
6	27815016	+	252.905	-0.0592842	0.743489	H2BC14	BA
6	27831560	-	379.09	-0.28566	0.884058	H4C12	BBCABW
6	27838369	-	509.769	-0.32231	0.724652	H2AC15	VARR
6	27838375	-	2153.52	-0.319541	0.799686	H2AC15	BBCABW
6	27838543	+	225.278	-0.268639	0.931298	H2BC15	BA
6	27838549	+	176.166	-0.45487	0.846512	H2BC15	BBCABW
6	27838557	+	716.616	-0.304376	0.912351	H2BC15	BBCABW
6	27838569	+	4409.18	-0.279499	0.789482	H2BC15	BBCABW
6	27838578	+	173.976	-0.254129	0.855172	H2BC15	BA
6	27838585	+	168.156	-0.280217	0.794549	H2BC15	BA
6	27867588	-	5945.75	-0.345873	0.871648	H1-5	BA
6	27872346	-	2292.23	-0.352853	0.845333	H3C11	BBCABW
6	27890826	-	14625.9	-0.59012	0.84641	H3C12	BA
6	27893181	-	306.58	-0.0956338	0.605263	H2AC17	BBCABW
6	27893185	-	19037.9	0.103262	0.924236	H2AC17	BBCABW
6	27893425	+	2306.41	-0.0601445	0.892354	H2BC17	BBCABW
6	28923971	-	104.812	0.400749	0.862069	TRIM27	BA
6	29942532	+	519.89	-0.469885	0.996213	HLA-A	BA
6	30489512	+	214.801	-0.390187	0.975334	HLA-E	VARR
6	30571444	+	115.361	-0.235395	0.961111	ABCF1	VARR
6	30617243	-	169.741	0.39151	0.819502	PPP1R10	BBCABW
6	30617840	+	298.002	-0.0246187	0.958957	MRPS18B	BA
6	30617858	+	124.812	-0.0307732	0.86985	MRPS18B	BA
6	30672996	-	167.767	-0.186406	0.959551	DHX16	VARR
6	30720357	+	3740.13	-0.398118	0.981677	TUBB	BA
6	30720360	+	385.284	-0.561467	0.945034	TUBB	BA
6	30720382	+	195.656	-0.376219	0.914634	TUBB	BA
6	30744547	-	1871.87	0.101312	0.873155	IER3	BBCABW
6	31541970	-	219.156	-0.516113	0.968905	DDX39B	BBCABW
6	31542003	-	552.299	0.155014	0.987743	DDX39B	BA
6	31542008	-	117.907	0.199159	0.92855	DDX39B	VARR
6	31666101	+	613.169	-0.133206	0.954416	CSNK2B	BBCABW
6	31736513	-	100.698	0.348387	0.978497	CLIC1	VARR
6	31815541	+	857.684	-0.0850769	0.965636	HSPA1A	BA
6	31815543	+	6478.54	0.507125	0.939689	HSPA1A	BA
6	31815544	+	314.975	-0.597203	0.911617	HSPA1A	BA
6	31827737	+	4071.17	0.501853	0.971736	HSPA1B	VARR
6	31827738	+	903.824	0.316392	0.946469	HSPA1B	VARR
6	31827739	+	268.325	0.461285	0.919614	HSPA1B	BA
6	31827740	+	548.14	0.0567055	0.920354	HSPA1B	BA
6	31959175	+	186.68	-0.27974	0.985075	SKIC2	SSCAGC
6	32972201	+	407.922	0.464105	0.927114	BRD2	BBCABW
6	33272084	+	230.594	0.117796	0.935452	RPS18	BBCABW
6	33289601	+	300.434	-0.168942	0.953719	PFDN6	BA
6	33314254	-	111.318	-0.584684	0.914773	TAPBP	BA
6	33418103	-	287.394	0.11589	0.962264	CUTA	BA
6	33418107	-	153.584	0.173409	0.969494	CUTA	BA
6	34236879	+	170.981	0.521122	0.918455	HMGA1	BA
6	34236910	+	115.312	0.0297724	0.942815	HMGA1	BA
6	34426062	-	238.83	-0.873747	0.988846	RPS10	BA
6	34757497	+	168.07	0.605107	0.979051	SNRPC	BBCABW
6	34757510	+	109.936	0.0890503	0.96513	SNRPC	BA
6	34757514	+	632.87	0.194901	0.986282	SNRPC	BA
6	34757519	+	129.368	-0.317406	0.878011	SNRPC	BA
6	34757526	+	186.518	0.180526	0.975657	SNRPC	BA
6	34757536	+	134.395	-0.31978	0.976905	SNRPC	BA
6	34888042	-	160.494	-0.161391	0.954097	TAF11	BA
6	35468401	+	262.566	-0.506517	0.983355	RPL10A	BA
6	35468417	+	142.25	-0.669367	0.973094	RPL10A	BA
6	35921095	-	242.522	-0.126877	0.973808	SRPK1	BBCABW
6	36594367	+	226.687	0.371791	0.925373	SRSF3	BBCABW
6	36678710	+	494.417	0.651775	0.878509	CDKN1A	SSCAGC
6	36874792	-	217.79	0.0707496	0.956522	PPIL1	BA
6	36874796	-	424.743	0.125361	0.982857	PPIL1	VARR
6	36874803	-	101.746	-0.430962	0.973118	PPIL1	BA
6	38703127	-	154.12	-0.365448	0.933333	GLO1	BBCABW
6	38703135	-	135.167	-0.0185445	0.879377	GLO1	BA
6	38703145	-	1430.55	0.18015	0.973165	GLO1	BBCABW
6	38703176	-	137.379	0.257539	0.943662	GLO1	BA
6	41787641	+	111.861	0.179102	0.97037	TOMM6	BBCABW
6	41787660	+	426.015	0.278852	0.928571	TOMM6	BA
6	41787671	+	240.159	-0.455952	0.97619	TOMM6	BA
6	41787681	+	290.216	0.0696146	0.971777	TOMM6	BA
6	41787687	+	375.76	-0.107226	0.981478	TOMM6	BA
6	41787695	+	457.317	-0.129462	0.975299	TOMM6	BBCABW
6	41921499	+	401.648	0.12508	0.9636	BYSL	VARR
6	42879917	+	120.846	0.486628	0.954545	RPL7L1	BA
6	43021626	+	192.063	-0.268189	0.956844	RRP36	BBCABW
6	43059402	-	113.839	0.0793101	0.951264	MRPL2	BA
6	43517089	+	106.007	-0.0391154	0.911263	POLR1C	BA
6	43576185	+	232.761	0.366619	0.950869	POLH	BBCABW
6	44223595	+	106.487	-0.39321	0.97861	SLC29A1	BA
6	44247097	+	4633.49	-0.527286	0.978207	HSP90AB1	BA
6	44247111	+	146.274	-0.28435	0.895699	HSP90AB1	BBCABW
6	44257528	-	181.878	-0.0949012	0.970588	SLC35B2	BBCABW
6	44387710	+	259.198	-0.106393	0.978622	CDC5L	VARR
6	47309905	-	302.897	1.13463	0.902778	TNFRSF21	BBCABW
6	53545098	-	268.188	0.158018	0.907204	GCLC	BA
6	53545101	-	696.417	0.254019	0.916303	GCLC	VARR
6	56642889	-	114.936	-1.05072	0.9138	DST	BA
6	57172306	+	153.026	-0.163758	0.952015	BAG2	BA
6	57172326	+	344.871	-0.191746	0.985376	BAG2	VARR
6	73452276	-	122.325	0.0534321	0.922464	CGAS	BBCABW
6	75243767	-	205.423	0.221727	0.979737	COX7A2	BBCABW
6	75243786	-	451.689	0.336373	0.967429	COX7A2	BBCABW
6	75243807	-	163.416	-0.177289	0.957252	COX7A2	BA
6	80004650	+	128.258	-0.250699	0.964763	TTK	VARR
6	82247723	-	117.25	0.0184698	0.907121	IBTK	BA
6	82247744	-	151.617	-0.336186	0.971831	IBTK	BA
6	83431051	-	277.946	0.697403	0.961165	ME1	BA
6	85450083	+	114.058	1.05901	0.884211	NT5E	BA
6	87589975	-	150.635	-0.105095	0.958824	RARS2	BBCABW
6	87590128	+	104.056	0.181999	0.95813	ORC3	VARR
6	87702233	-	232.215	-0.331887	0.954128	AKIRIN2	VARR
6	96897863	-	151.652	-0.111194	0.953756	NDUFAF4	BA
6	96897891	-	361.824	0.51359	0.953589	NDUFAF4	BBCABW
6	99425308	-	172.95	-0.0213788	0.960408	PNISR	BA
6	106629578	+	157.745	-0.0118629	0.949907	QRSL1	BBCABW
6	109382411	-	460.522	-0.149811	0.988735	CD164	BA
6	109382467	-	115.902	-0.498885	0.938489	CD164	BA
6	110180427	+	188.202	0.040279	0.980565	CDC40	BA
6	110958747	+	106.042	-0.0287773	0.978947	GTF3C6	BA
6	113857347	+	209.516	-0.266858	0.902097	MARCKS	BBCABW
6	113971136	-	137.709	-0.0395339	0.940447	HDAC2	BA
6	116279894	-	145.543	-0.526408	0.963093	TSPYL1	BA
6	121435646	+	114.199	-0.141801	0.937153	GJA1	VARR
6	121435647	+	116.757	0.0923724	0.936747	GJA1	VARR
6	122471807	-	338.562	-0.0564211	0.917323	SERINC1	BA
6	122471811	-	174.318	-0.0123426	0.965517	SERINC1	BA
6	125919255	+	133.61	-1.00764	0.665803	NCOA7	BA
6	127118668	+	118.034	-0.66004	0.984906	RSPO3	BA
6	127118671	+	603.398	-0.588224	0.836017	RSPO3	BA
6	127343351	-	195.78	-0.111509	0.97786	ECHDC1	BA
6	127343358	-	178.226	0.30185	0.962662	ECHDC1	BA
6	127343359	-	647.2	0.139031	0.954698	ECHDC1	VARR
6	131951372	-	252.737	0.329628	0.838462	CCN2	BBCABW
6	134174861	-	263.353	-0.96901	0.896446	SGK1	BA
6	134174864	-	138.306	-1.38323	0.951957	SGK1	SSCAGC
6	136289844	-	404.238	0.137265	0.977611	BCLAF1	BA
6	136289807	-	158.772	-0.188003	0.980392	BCLAF1	BA
6	136289846	-	100.742	-0.171825	0.974413	BCLAF1	BA
6	138107419	-	240.302	-0.282328	0.949484	PERP	BBCABW
6	142147263	+	190.723	0.0293675	0.965075	VTA1	BA
6	142302677	+	305.274	0.531863	0.887814	ADGRG6	BBCABW
6	143843367	+	162.379	0.00321031	0.924837	LTV1	BA
6	144095563	-	130.848	-0.188328	0.877451	SF3B5	BA
6	144095573	-	2069.64	0.306822	0.971883	SF3B5	BBCABW
6	144095619	-	173.454	-0.00473763	0.976436	SF3B5	BBCABW
6	149864359	-	104.846	-0.004038	0.952381	LRP11	BBCABW
6	151240410	+	373.252	-0.811288	0.944444	AKAP12	BBCABW
6	152983039	-	298.983	-0.114732	0.884069	FBXO5	BA
6	154733416	+	132.516	-0.251041	0.977124	SCAF8	BBCABW
6	158168352	+	542.627	-0.176961	0.984923	GTF2H5	BBCABW
6	158168363	+	114.817	0.055235	0.972	GTF2H5	BA
6	158819339	-	166.407	-0.634409	0.959023	EZR	BA
6	158819368	-	151.129	-0.722229	0.921986	EZR	BBCABW
6	159693241	-	134.281	-0.23098	0.950722	SOD2	BBCABW
6	159789587	-	346.413	-0.393198	0.983714	TCP1	BA
6	159789599	-	375.263	-0.266063	0.929054	TCP1	BA
6	159789602	-	1782.66	-0.00339441	0.987165	TCP1	BBCABW
6	159790468	+	137.064	0.20597	0.952184	MRPL18	VARR
6	159790488	+	267.064	-0.0629799	0.940789	MRPL18	BA
6	159790492	+	162.473	0.0159817	0.926407	MRPL18	VARR
6	165988052	-	159.348	0.201136	0.9	PDE10A	SSCAGC
6	170553257	-	146.934	-0.265691	0.955272	PSMB1	VARR
6	170553263	-	167.226	-0.080258	0.898305	PSMB1	BA
6	170553272	-	245.93	0.136649	0.963652	PSMB1	VARR
6	170553275	-	254.365	-0.332156	0.984588	PSMB1	BA
6	170553290	-	409.75	-0.234968	0.972292	PSMB1	BA
6	170553294	-	255.515	-0.625563	0.989887	PSMB1	SSCAGC
6	170553299	-	643.956	0.408236	0.948641	PSMB1	VARR
6	170584618	-	137.288	0.491953	0.96875	PDCD2	SSCAGC
7	1138276	-	117.739	-0.366021	0.989796	C7orf50	BA
7	1160196	-	127.921	0.433231	0.89823	ZFAND2A	VARR
7	1459470	-	166.379	-0.359656	0.862745	MICALL2	BBCABW
7	1556205	-	114.222	-0.202119	0.952375	TMEM184A	BBCABW
7	1570032	-	448.069	-0.315584	0.955798	PSMG3	BBCABW
7	2242186	-	106.162	0.0932561	0.980317	MRM2	VARR
7	2242205	-	120.717	-0.0832781	0.946897	MRM2	BBCABW
7	2242226	+	306.544	-0.0394462	0.992	NUDT1	BA
7	2354827	+	453.059	0.502273	0.925442	EIF3B	BA
7	2354869	+	157	-0.00553473	0.969565	EIF3B	VARR
7	5530601	-	33344.2	-0.432108	0.937887	ACTB	BA
7	6009272	+	153.529	-0.430515	0.963192	AIMP2	BA
7	6009274	+	135.304	-0.0438873	0.736304	AIMP2	VARR
7	6009275	+	238.397	-0.556528	0.851163	AIMP2	VARR
7	6059175	-	450.245	0.301238	0.95658	EIF2AK1	BA
7	6484149	-	124.666	-0.0324948	0.988636	KDELR2	BA
7	6484169	-	180.928	-0.169764	0.989583	KDELR2	BA
7	6484181	-	105.479	-0.146632	0.967742	DAGLB	BA
7	6484190	-	1114.15	-0.219575	0.972142	DAGLB	BBCABW
7	6590021	+	127.815	-0.0228199	0.934211	INTS15	BBCABW
7	10940130	-	159.517	0.226761	0.935075	NDUFA4	BA
7	10940135	-	522.627	0.00328746	0.96217	NDUFA4	BBCABW
7	10940158	-	158.619	0.545321	0.952025	NDUFA4	BA
7	10940173	-	483.661	0.0338483	0.982136	NDUFA4	BA
7	10940177	-	352.168	-0.208428	0.981771	NDUFA4	VARR
7	10940188	-	215.26	0.201558	0.92586	NDUFA4	VARR
7	12687042	+	301.802	0.401259	0.951282	ARL4A	VARR
7	16646181	+	437.495	0.434605	0.944314	BZW2	BBCABW
7	16646189	+	381.828	0.17764	0.930669	BZW2	BBCABW
7	16804995	-	3362.45	1.285	0.979833	AGR2	BA
7	16804999	-	1468.07	1.38428	0.955839	AGR2	BA
7	17298652	+	195.94	-0.241789	0.9375	AHR	BBCABW
7	22822835	-	147.03	0.11528	0.956897	TOMM7	BA
7	23299341	+	107.526	-0.0398402	0.918415	MALSU1	VARR
7	23531981	-	314.086	-0.171407	0.94709	TRA2A	BBCABW
7	25125260	-	852.563	0.200914	0.99142	CYCS	BA
7	25125264	-	167.718	-0.207545	0.947748	CYCS	BA
7	25125300	-	106.753	-0.145939	0.898305	CYCS	BA
7	26200743	-	930.352	-0.271992	0.959408	HNRNPA2B1	BA
7	26200746	-	5743.36	-0.357786	0.961386	HNRNPA2B1	BBCABW
7	26200773	-	139.193	0.401726	0.95	HNRNPA2B1	VARR
7	26200775	-	174.476	-0.148014	0.958847	HNRNPA2B1	BA
7	26201726	+	221.994	-0.352898	0.950617	CBX3	SSCAGC
7	26201783	+	126.104	-0.118673	0.954734	CBX3	VARR
7	30504824	-	112.38	0.0788927	1	GGCT	BA
7	30504832	-	138.298	-0.0848549	0.967742	GGCT	BBCABW
7	32490380	-	2236.08	0.0977626	0.964873	LSM5	BBCABW
7	32490385	-	1848.34	-0.0398872	0.95513	LSM5	VARR
7	32490394	-	156.209	0.392226	0.923077	LSM5	BA
7	32490397	-	214.012	-0.213662	0.987595	LSM5	BA
7	32490411	-	132.643	-0.0161808	0.99	LSM5	VARR
7	35037483	-	113.708	0.665891	0.986486	DPY19L1	VARR
7	35801219	+	1265.13	-0.182012	0.958649	SEPTIN7	BBCABW
7	40134619	-	112.438	0.0603363	0.971852	MPLKIP	BA
7	42932377	+	334.509	0.130272	0.984424	MRPL32	BA
7	42932384	+	108.466	0.742505	0.776923	MRPL32	VARR
7	43729483	-	307.856	-0.686943	0.971024	COA1	VARR
7	43729497	-	297.64	0.164246	0.974954	COA1	BA
7	43729510	-	153.909	-0.223712	0.941176	COA1	BA
7	43729533	-	115.422	0.104151	0.977778	COA1	BA
7	43869498	-	155.042	1.22604	0.928571	MRPS24	VARR
7	43869521	-	279.672	0.0623165	0.983146	MRPS24	BA
7	44044706	+	131.309	0.374113	0.972028	DBNL	BA
7	44123548	-	208.925	0.113563	0.95671	POLD2	VARR
7	44573908	-	645.629	-0.59151	0.959826	DDX56	BA
7	44573927	-	464.661	-0.393172	0.96378	DDX56	BA
7	44848080	-	183.707	0.0457576	0.974288	H2AZ2	BA
7	44848087	-	202.281	0.214317	0.94961	H2AZ2	BA
7	45111697	-	152.189	0.0574281	0.957518	TBRG4	BA
7	45921272	-	1052.71	-2.69697	0.940436	IGFBP3	BA
7	47582603	-	118.939	-0.618674	0.90566	TNS3	BA
7	48089227	+	170.374	-0.551297	0.97963	UPP1	BA
7	48089265	+	391.088	-0.546199	0.93865	UPP1	BBCABW
7	54759192	-	186.149	-0.121695	0.966718	SEC61G	BA
[truncated: 2,975 more rows]
