# Supplementary material for: Decoding m6Am by simultaneous transcription-start mapping and methylation quantification
Source: eLife. 2025 Mar 31;13:RP104139. doi: 10.7554/eLife.104139 (PMC11957539; doi:10.7554/eLife.104139)
Supplement: Figure 6—source data 1. [file elife-104139-fig6-data1.xlsx]

## Sheet: Legend
Figure 6 - Source Data 1. m6Am stoichiometries of A-TSN in snRNA, snoRNA, and pseudogenes.
Sheet 1. Statistics of snRNA and snoRNA methylation levels among different cell lines
Sheet 2. snRNA methylation
Sheet 3. snoRNA methylation
Sheet 4. snRNA/snoRNA pseudogene methylation

## Sheet: Statistics
snRNA
	Number of sites	Average	SD	Min	25th percentile	Median	75th percentile	Max
A549	31	0.300151	0.192874	0.0566728	0.141526	0.256817	0.453298	0.689699
CCD841	24	0.215862	0.155675	0.0413223	0.093328	0.188433	0.294051	0.501771
HCT116	25	0.246678	0.159242	0.0515486	0.106672	0.227509	0.349746	0.591549
HEK293T	45	0.212985	0.16022	0.018549	0.102732	0.161102	0.299922	0.575758
HEK293T_FTOKO	30	0.361691	0.150067	0.110494	0.257522	0.398322	0.456772	0.688962
HepG2	33	0.364239	0.237127	0.0550459	0.15534	0.315789	0.62	0.769026
HT29	33	0.350426	0.151866	0.0615385	0.256989	0.338983	0.479858	0.599372
Huh7	31	0.45778	0.264511	0.0864198	0.23133	0.438202	0.712393	0.892875
Jurkat	29	0.319457	0.198542	0.0528423	0.146667	0.257143	0.524426	0.691176
K562	30	0.32553	0.159043	0.050592	0.206735	0.323251	0.451341	0.732143
snoRNA
	Number of sites	Average	SD	Min	25th percentile	Median	75th percentile	Max
A549	13	0.260963	0.203459	0.0909091	0.119009	0.126439	0.50885	0.58925
CCD841	7	0.238175	0.192587	0.0833333	0.104462	0.139785	0.310752	0.61368
HCT116	10	0.147835	0.155975	0.0120482	0.0462167	0.0577364	0.285825	0.391973
HEK293T	15	0.13194	0.182964	0	0.0312805	0.0458406	0.115988	0.490273
HEK293T_FTOKO	10	0.400801	0.172281	0.24	0.26464	0.319734	0.518384	0.738246
HepG2	12	0.337695	0.305111	0.0163934	0.10739	0.175768	0.613193	0.884615
HT29	10	0.244592	0.198753	0.0506329	0.104916	0.132963	0.405422	0.592906
Huh7	10	0.338693	0.215752	0.0989011	0.228708	0.24087	0.421429	0.740354
Jurkat	10	0.218371	0.153782	0.0662594	0.136944	0.174908	0.199392	0.515564
K562	10	0.219173	0.210399	0.0125	0.0737734	0.0994829	0.427223	0.546605

## Sheet: snRNA
Chr	Position (hg38, 1-based)	Strand	Gene	snRNA	Distance to annotated TSS	CCD841	HCT116	K562	HepG2	HEK293T	HEK293T_FTOKO	A549	Huh7	HT29	Jurkat
1	11908152	+	RNU5E-1	U5	0	0.276588	0.223938	0.074184	0.128854	0.018549	0.247358	0.0891079	0.545224	0.544693	0.585959
1	16666948	-	RNU1-3	U1	0		0.104478	0.327273		0.188235	0.446809	0.290698	0.23913	0.129412	0.257143
1	28648600	+	RNU11	U11	0	0.259456	0.166735	0.408385	0.327335	0.161102	0.384879	0.199276	0.268113	0.393591	0.181193
1	28648601	+	RNU11	U11	1	0.049505		0.204082	0.125935	0.116427	0.141509	0.12	0.223301	0.166667	0.144444
1	44721903	-	RNU5F-1	U5	-1	0.206393	0.106672	0.214693	0.160848	0.0581077	0.252549	0.256817	0.746485	0.417695	0.248122
1	44731170	-	RNU5D-1	U5	0	0.100353	0.0559701	0.19375	0.151348	0.0444166	0.281446	0.137183	0.271128	0.257215	0.100175
1	120354987	+	U1	U1	0			0.473078	0.688889			0.635729	0.803551	0.537453	0.559524
1	120571120	+	U2	U2	0	0.431034	0.349746	0.453917	0.588491	0.411148	0.523093	0.556866	0.76221	0.385135	0.436406
1	144412576	+	RNVU1-15	RNVU	0	0.266487	0.296476	0.46823	0.379208	0.299922	0.418784	0.32761	0.492069	0.431867	0.196026
1	144412578	+	RNVU1-15	RNVU	2					0.232365	0.145455	0.156522
1	144560829	-	RNVU1-28	RNVU	0	0.208767	0.126984	0.396779	0.342611	0.137173	0.419297	0.236875	0.267581	0.269231
1	145281116	+	RNVU1-14	RNVU	0	0.447917	0.392865	0.471903	0.643679	0.420774	0.460093	0.523781	0.697617	0.48192	0.534743
1	145465780	-	RNVU1-31	RNVU	0		0.112403	0.292079	0.47151	0.136499	0.425817	0.277977	0.133791	0.207252
1	146052244	-	RNVU1-6	RNVU	0	0.346438	0.336822	0.443615	0.718152	0.502077	0.46737	0.595212	0.776687	0.503256	0.446261
1	146409903	+	RNVU1-25	RNVU	0		0.449257	0.467642	0.386041			0.577718		0.572245	0.524426
1	147084756	-	RNVU1-8	RNVU	0			0.348291	0.637823	0.472261	0.511494	0.531223	0.727168	0.39053
1	148362533	-	RNVU1-1	RNVU	0		0.300534	0.307692	0.295918	0.164634	0.488889	0.151316	0.149638	0.41829	0.181695
1	148522601	+	RNVU1-27	RNVU	0	0.501771	0.534547	0.56458	0.751079	0.546066	0.6155	0.689699	0.836207	0.599372	0.609258
12	6943814	+	RNU7-1	U7	-2	0.480769	0.591549	0.732143	0.769026	0.55551	0.688962	0.559928	0.892875	0.596154	0.691176
12	120291903	-	RNU4-2	U4	0	0.0722537	0.0515486	0.168306	0.136473	0.102732	0.299389	0.145869	0.271882	0.260866	0.0974854
12	120293237	-	RNU4-1	U4	0	0.103629	0.0697871	0.157103	0.188482	0.108815	0.330519	0.206807	0.248185	0.256989	0.0528423
15	65296051	+	RNU5A-1	U5	0	0.0607214	0.0622173	0.108837	0.124042	0.060428	0.317098	0.103941	0.207141	0.187908	0.112312
15	65296053	+	RNU5A-1	U5	2	0.0413223			0.0550459	0.0470118	0.133242	0.0770081	0.0864198	0.0615385	0.0611111
15	65304677	+	RNU5B-1	U5	0	0.1855	0.376083	0.050592	0.236409	0.030034	0.272441	0.057498	0.680706	0.479858	0.615038
15	65304679	+	RNU5B-1	U5	2	0.0704225			0.192982	0.0356268	0.116564	0.0566728
17	43240111	-	U2	U2	0					0.237288		0.340136
2	121530878	+	RNU4ATAC	RNU4ATAC	-3	0.115942	0.269841	0.283582	0.315789	0.225166	0.44	0.360656	0.438202	0.338983	0.347826
2	121530880	+	RNU4ATAC	RNU4ATAC	-1	0.191366	0.227509	0.325073	0.420564	0.252554	0.421256	0.382814	0.637917	0.319869	0.294617
2	121530884	+	RNU4ATAC	RNU4ATAC	3	0.122449	0.257576	0.224138	0.162213	0.183673	0.327273	0.296053			0.127273
22	42615244	+	RNU12	U12	0	0.0551411	0.132884	0.117021	0.0780989	0.0505853	0.222471	0.11878	0.300874	0.201525	0.216925
1	11908154	+	RNU5E-1	U5	2					0.0208682	0.110494
1	16514285	-	RNU1-1	U1	0					0.163934
1	16740516	+	RNU1-4	U1	0		0.101266	0.272727	0.238806	0.151515	0.528926	0.244898	0.223529	0.0943396	0.21519
1	28648596	+	RNU11	U11	-4					0.124444			0.0925926
1	28648597	+	RNU11	U11	-3	0.103448		0.321429	0.15534	0.1344	0.411765		0.172222	0.205882	0.146667
1	28648602	+	RNU11	U11	2					0.159722
1	28648603	+	RNU11	U11	3					0.097561
1	28648604	+	RNU11	U11	4					0.0510204
1	44721901	-	RNU5F-1	U5	1					0.136364
1	120354989	+	U1	U1	2									0.333333
1	145281118	+	RNVU1-14	RNVU	2				0.112903	0.297959					0.25974
1	147084754	-	RNVU1-8	RNVU	2			0.37069		0.352941			0.633053	0.325581
1	148522603	+	RNVU1-27	RNVU	2					0.238636
17	43290481	-	U2	U2	0				0.7	0.575758
19	893480	+	RNU6-9	U6	-4					0.444444				0.339623	0.438356
2	121530881	+	RNU4ATAC	RNU4ATAC	0					0.368421
1	16895980	+	RNU1-2	U1	0					0.36
1	120850985	-	RNVU1-19	RNVU	0	0.483014	0.469249	0.524074	0.716				0.810135	0.583068	0.582331
17	43296615	-	U2	U2	0				0.62
KI270713.1	22024	-	U1	U1	0					0.107143
1	120850983	-	RNVU1-19	RNVU	2								0.555556	0.272727

## Sheet: snoRNA
Chr	Position (hg38, 1-based)	Strand	Gene	Distance to annotated TSS	CCD841	HCT116	K562	HepG2	HEK293T	HEK293T_FTOKO	A549	Huh7	HT29	Jurkat
17	58631836	-	U3.18	0	0.333767	0.391973	0.488402	0.591291	0.461173	0.536262	0.512676	0.740354	0.498967	0.515564
17	58631839	-	U3.18	-3		0.375529	0.497788	0.678899	0.481209	0.590164	0.50885	0.672488	0.440236	0.478242
1	116278606	+	U3.30	0					0.0408163	0.24	0.151515
17	58631835	-	U3.18	1		0.0612245	0.0515464	0.0315789	0.0616667		0.0909091	0.0989011	0.0506329	0.0662594
3	64072019	-	U3.4	0					0.0291262		0.0945946
17	19188016	+	SNORD3A	0	0.0833333	0.0120482	0.0125	0.174548	0.0391328	0.322754	0.126439	0.240741	0.0705882	0.1625
17	19061912	+	SNORD3B-1	0	0.12069	0.0248984	0.0808081	0.176987	0.0473476	0.25281	0.116208	0.226744	0.09699	0.199227
17	19061909	+	SNORD3B-1	-3					0.0188679
17	19064136	-	SNORD3B-2	0		0.0510949	0.104478	0.109091	0.0458406	0.246183	0.123404	0.245098	0.131868	0.199446
17	19064135	-	SNORD3B-2	1					0.0111111
17	19190245	-	SNORD3C	0	0.139785	0.0542484	0.0944882	0.102288	0.0334348	0.30013	0.124471	0.241	0.128693	0.183253
17	19112636	-	SNORD3D	0	0.0882353	0.0445906	0.0714286	0.156651	0.048788	0.316715	0.119009	0.234599	0.134058	0.166563
8	33513475	+	SNORD13	0	0.61368	0.340278	0.546605	0.724682	0.490273	0.738246	0.58925	0.480205	0.592906	0.128425
8	33513472	+	SNORD13	-3				0.884615			0.575342
6	31835263	+	SNORD48	0				0.0163934
17	8173588	-	SNORD118	-1	0.287737	0.122467	0.243685	0.405316	0.17031	0.464752	0.259847	0.206803	0.30098	0.0842332

## Sheet: Pseudoenes
Chr	Position (hg38, 1-based)	Strand	Gene	Category	Similar to	Comment	CCD841	HCT116	K562	HepG2	HEK293T	HEK293T_FTOKO	A549	Huh7	HT29	Jurkat
1	1264886	-	UBE2J2	Intronic	U2 pseudogene or U4 pseudogene	UBE2J2_intron	0.898305
1	9830881	-	UNKNOWN	Intronic	U3 (SNORD3B-2)	BC172294_intron							0.933333
1	11909907	-	RNU5E-4P	known snRNA snoRNA pseudogene	U5 pseudogene						0.293103
1	11909925	-	RNU5E-4P	known snRNA snoRNA pseudogene	U5 pseudogene		0.271028	0.230769	0.270833		0.193215	0.30445	0.407883	0.478395	0.340557	0.222044
1	24749675	+	CLIC4	Intronic	U6 pseudogene	CLIC4_intron										0.0227273
1	26246754	+	CEP85	Intronic	U3 snoRNA, SNORD3C	CEP85_intron	0.1158	0.0405352	0.0952831	0.133581	0.034718	0.265448	0.102633	0.2484	0.100814	0.185629
1	26246755	+	CEP85	Intronic	U3 snoRNA, SNORD3C	CEP85_intron					0.00333333
1	29911015	-	UNKNOWN	intergenic	U3 snoRNA	intergenic					0.0573514		0.178571			0.1625
1	39168632	-	UNKNOWN	Intronic	U3 pseudogene or U6 pseudogene or U7 pseudogene	MACF1_intron	0.00442478				0	0	0
1	40529650	-	ZNF684	upstream	U2 pseudogene	ZNF684_upstream					0.468531		0.5
1	44819995	-	RNU5E-6P	known snRNA snoRNA pseudogene	U5 pseudogene		0.103448		0.2	0.360231	0.126224	0.163043	0.247191	0.35514	0.365385	0.33908
1	44819997	-	RNU5E-6P	known snRNA snoRNA pseudogene	U5 pseudogene		0.173724	0.18347	0.289	0.262649	0.0938896	0.279365	0.23669	0.266395	0.428967	0.228159
1	44819999	-	RNU5E-6P	known snRNA snoRNA pseudogene	U5 pseudogene		0.265365	0.226891	0.377143	0.328702	0.136675	0.268779	0.255636	0.35044	0.413793	0.309561
1	45522797	-	PRDX1	mRNA_lncRNA_TSS	U2 pseudogene or U6 pseudogene	PRDX1_exon1, can be a real mRNA TSS				0.836735	0.931217		0.879518	0.938462
1	45522802	-	PRDX1	mRNA_lncRNA_TSS	U2 pseudogene or U6 pseudogene	PRDX1_exon1, can be a real mRNA TSS		0.856178		0.935171	0.939759		0.927711	0.950593
1	45522810	-	PRDX1	mRNA_lncRNA_TSS	U2 pseudogene or U6 pseudogene	PRDX1_exon1, can be a real mRNA TSS		0.865385		0.962025	0.971429		0.93617	0.918033
1	45522813	-	PRDX1	mRNA_lncRNA_TSS	U2 pseudogene or U6 pseudogene	PRDX1_exon1, can be a real mRNA TSS		0.933702		0.951512	0.986395		0.936782	0.895664
1	45522818	-	PRDX1	mRNA_lncRNA_TSS	U2 pseudogene or U6 pseudogene	PRDX1_exon1, can be a real mRNA TSS		0.887324		0.865947	0.95		0.926554	0.847222
1	45522821	-	PRDX1	mRNA_lncRNA_TSS	U2 pseudogene or U6 pseudogene	PRDX1_exon1, can be a real mRNA TSS		0.922535		0.902682	0.947977		0.959375	0.943395
1	45522834	-	PRDX1	mRNA_lncRNA_TSS	U2 pseudogene or U6 pseudogene	PRDX1_exon1, can be a real mRNA TSS							0.857143
1	45522876	-	PRDX1	mRNA_lncRNA_TSS	U2 pseudogene or U6 pseudogene	PRDX1_exon1, can be a real mRNA TSS								1
1	76958738	-	UNKNOWN	Intronic	U1, U1 variants, or U1 pseudogene	ST6GALNAC5_intron			0.625		0.416667	0.515789	0.31746	0.484848	0.419355	0.3875
1	143720642	-	RNVU1-23	known snRNA snoRNA pseudogene	U1 pseudogene						0.385965
1	148263478	+	RNVU1-22	known snRNA snoRNA pseudogene	U1 pseudogene			0.280899			0.27451			0.493755	0.288889
1	148334761	-	RNVU1-21	known snRNA snoRNA pseudogene	U1 pseudogene									0.0163934
1	148334765	-	RNVU1-21	known snRNA snoRNA pseudogene	U1 pseudogene			0.269939	0.319672		0.386506	0.43184	0.472318	0.413413	0.297956	0.179104
1	148388651	-	RNVU1-2	known snRNA snoRNA pseudogene	U1 pseudogene						0.0757576	0.333333	0.130435
1	156193763	-	SLC25A44	upstream	U6 pseudogene or U7 pseudogene	SLC25A44_upstream					0.0166667
1	160944881	-	UNKNOWN	antisense	U6 pseudogene (RNU6-189P)	ENST00000356006.3_antisense				0.0142857	0.0296128	0.0119236	0.0135747	0		0
1	168354845	+	ENSG00000293102	Intronic	RNU4-72P	ENSG00000293102_intron								0.97561
1	171373553	+	UNKNOWN	intergenic	RNU4-72P	intergenic					0.941176
1	173791548	+	RN7SKP160	known snRNA snoRNA pseudogene	7SK pseudogene					0.0151515	0.00673401	0.00384615	0		0
1	210374265	-	RNU5A-8P	known snRNA snoRNA pseudogene	U5 pseudogene								0.091716
1	210374267	-	RNU5A-8P	known snRNA snoRNA pseudogene	U5 pseudogene						0.0296496	0.227273	0.0805861	0.22795	0.0740741	0.269841
1	210374270	-	RNU5A-8P	known snRNA snoRNA pseudogene	U5 pseudogene		0.190513		0.30297	0.108314	0.0379216	0.22192	0.103056	0.237615	0.123317	0.239637
1	224175955	-	DEGS1	Intronic	U1, U1 variants, or U1 pseudogene	DEGS1_intron				0.240741	0.155172
1	228103502	+	C1orf35	known snRNA snoRNA pseudogene	U6 pseudogene or U7 pseudogene	C1orf35_exon_antisense					0.973684
1	244869933	-	UNKNOWN	intergenic	RNU2-22P	intergenic					0.660377
1	244869934	-	UNKNOWN	intergenic	RNU2-22P	intergenic				0.09375	0.105474
2	11561194	+	RNU2-13P	known snRNA snoRNA pseudogene	U2 pseudogene			0.333333			0.463158		0.512821	0.762887		0.522511
2	29031220	-	TOGARAM2	Intronic	U2 pseudogene or U4 pseudogene	TOGARAM2_intron				0.0327869	0.0147059					0
2	29031222	-	TOGARAM2	Intronic	U2 pseudogene or U4 pseudogene	TOGARAM2_intron				0	0.0289855					0.0185185
2	29031223	-	TOGARAM2	Intronic	U2 pseudogene or U4 pseudogene	TOGARAM2_intron				0.03125	0.0128205					0.00961539
2	54404592	+	UNKNOWN	intergenic	U2 pseudogene or U4 pseudogene	intergenic										0.0227273
2	55519418	-	CFAP36	upstream	U6 pseudogene or U7 pseudogene	CFAP36_upstream					0.882353
2	55519420	-	CFAP36	upstream	U6 pseudogene or U7 pseudogene	CFAP36_upstream					0.965909
2	58113011	+	VRK2	Intronic	U2 pseudogene, U6 pseudogene, or U7 pseudogene	VRK2_intron							0.934066
2	85728343	-	RNU1-38P	known snRNA snoRNA pseudogene	U1 pseudogene						0.419355
2	88016547	-	RNU2-63P	known snRNA snoRNA pseudogene	U2 pseudogene		0.318089	0.403358	0.448633	0.613007	0.535131	0.567928	0.581517	0.800582	0.475113	0.577664
2	112511365	-	UNKNOWN	Intronic	U2 pseudogene	TTL_intron					0.518519
2	114420125	+	RNU2-41P	known snRNA snoRNA pseudogene	U2 pseudogene						0.43		0.582317
2	127626482	+	MYO7B	Intronic	U6 pseudogene or U7 pseudogene	MYO7B_intron										0.956661
2	156617162	+	UNKNOWN	Intronic	RNU6-781P	KJ901462_intron								0.965294
2	175594569	-	ENSG00000289349	antisense	RNU4-72P	ENSG00000289349_antisense					0.909091
2	178142546	+	RNU5E-9P	known snRNA snoRNA pseudogene	U5 pseudogene		0.0275229		0.121951	0.120389	0.026097	0.307843	0.119241	0.115942		0.144928
2	178142548	+	RNU5E-9P	known snRNA snoRNA pseudogene	U5 pseudogene						0.0491071	0.0689655
2	188287692	-	LINC01090	Intronic	RNU4-39P	LINC01090_intron			0.845528					0.876648
2	227232250	+	COL4A3	Intronic	U5 pseudogene	COL4A3_intron					0.142857		0.0963855
2	231502201	-	RNU2-22P	known snRNA snoRNA pseudogene	U2 pseudogene		0.325843	0.307143	0.396825	0.591667	0.426941	0.438924	0.506193	0.684478	0.417582	0.362999
3	9986918	+	ENSG00000291224	Intronic	U6 pseudogene or U7 pseudogene	EMC3_intron					0.859756
3	9986919	+	ENSG00000291224	Intronic	U6 pseudogene or U7 pseudogene	EMC3_intron					0.643564
3	9986924	+	ENSG00000291224	Intronic	U6 pseudogene or U7 pseudogene	EMC3_intron					0.890909
3	11225864	-	ENSG00000285906	Intronic	U6 pseudogene or U7 pseudogene	HRH1_intron									0.942857
3	33030319	-	GLB1	Intronic	U2 pseudogene	GLB1_intron	0.337349	0.331905	0.375	0.595554	0.47624	0.567431	0.562146	0.787017	0.387755	0.467669
3	33441710	-	UNKNOWN	mRNA_lncRNA_TSS	RNU4-39P	UBP1_upstrean, can be a real mRNA TSS				0.981818
3	41277904	-	ULK4	mRNA_lncRNA_TSS	RNU4-72P	ULK4_exon, can be a real mRNA TSS				0.984848
3	47513305	-	ELP6	mRNA_lncRNA_TSS	U6 pseudogene or U7 pseudogene	ELP6_exon or ELP6_intron, can be a real mRNA TSS					0.807018
3	47513306	-	ELP6	mRNA_lncRNA_TSS	U6 pseudogene or U7 pseudogene	ELP6_exon or ELP6_intron, can be a real mRNA TSS					0.670455
3	47513307	-	ELP6	mRNA_lncRNA_TSS	U6 pseudogene or U7 pseudogene	ELP6_exon or ELP6_intron, can be a real mRNA TSS					0.471264
3	47513308	-	ELP6	mRNA_lncRNA_TSS	U6 pseudogene or U7 pseudogene	ELP6_exon or ELP6_intron, can be a real mRNA TSS	0.811594		0.921569	0.808989	0.926812	0.948718		0.939024
3	69366497	-	FRMD4B	Intronic	U1, U1 variants, or U1 pseudogene	FRMD4B_intron					0.126761
3	69366499	-	FRMD4B	Intronic	U1, U1 variants, or U1 pseudogene	FRMD4B_intron	0.145455	0.172043	0.333333	0.311111	0.131397	0.438266	0.21608	0.311475	0.197802	0.177419
3	81271792	+	UNKNOWN	Intronic	U5 pseudogene	ENST00000464131.1_intron					0.04362	0.280702	0.106061	0.264706		0.0752688
3	81271794	+	UNKNOWN	Intronic	U5 pseudogene	ENST00000464131.1_intron					0.0537634
3	94538463	+	UNKNOWN	intergenic	U5 pseudogene	intergenic					0.0897436		0.142857			0.0185185
3	102167385	-	UNKNOWN	Intronic	U5 pseudogene	ZPLD1_intron										0.0188679
3	114901123	+	ZBTB20	Intronic	U6 pseudogene or U7 pseudogene	ZBTB20_intron							0.0133333
3	124901406	-	ITGB5	antisense	U2 pseudogene	ITGB5_antisense	0.895522			0.965517	0.955357		0.95
3	149334347	-	TM4SF18	antisense	RNU4-39P	TM4SF18_antisense							0.842105
3	150039196	+	ENSG00000243944	Intronic	RNU6-694P	PFN2_intron				0.80597
3	152969767	-	UNKNOWN	intergenic	U2 pseudogene or U7 pseudogene	intergenic	0.00819672						0.015625
3	168475198	+	RNU2-20P	known snRNA snoRNA pseudogene	U2 pseudogene						0.330769	0.433333	0.519824	0.771429		0.365854
3	175609479	+	RNU4-91P	known snRNA snoRNA pseudogene	U4 pseudogene			0.0545455		0.0517241	0.0927485	0.315436	0.172222
3	188668831	+	LPP	Intronic	U2 pseudogene	LPP intron					0.479675		0.566667	0.672727		0.337209
3	192155337	-	FGF12	Intronic	RNU4-72P	FGF12_intron					0.931818
4	3202712	+	HTT	Intronic	U2 pseudogene	HTT_intron										0.935049
4	3202714	+	HTT	Intronic	U2 pseudogene	HTT_intron										0.946429
4	15094094	-	RN7SKP170	known snRNA snoRNA pseudogene	7SK pseudogene						0.008	0.0126582	0		0
4	39032918	-	TMEM156	mRNA_lncRNA_TSS	U6 pseudogene	TMEM156_exon, can be a real mRNA TSS				0.896552			0.922601
4	55028860	+	UNKNOWN	intergenic	U5 pseudogene	intergenic	0.12931	0.0934615	0.118056	0.17161	0.0785912	0.248062	0.147772	0.152507	0.163158	0.0715209
4	65999181	+	ENSG00000249413	antisense	RNU4-72P	ENSG00000249413_antisense					0.855072			0.953846
4	80057105	-	ANTXR2	Intronic	U2 pseudogene	ANTXR2_intron		0.345825	0.388889	0.632251	0.491779	0.555556	0.54599	0.769695	0.442953	0.460473
4	113420323	+	RNU1-138P	known snRNA snoRNA pseudogene	U1 pseudogene					0.411765	0.228571	0.415094	0.112903
4	149915537	+	UNKNOWN	intergenic	RNU4-72P	intergenic					0.950617
4	165293309	-	UNKNOWN	Intronic	U2 pseudogene	KLHL2_intron	0.384615	0.318539	0.370107	0.438294	0.390798	0.474977	0.539943	0.733623	0.357616	0.444717
4	188109379	-	TRIML2	mRNA_lncRNA_TSS	U2 pseudogene	TRIML2_exon, can be a real mRNA TSS							0.5
5	78205303	+	UNKNOWN	Intronic	U5 pseudogene	AP3B1 intron					0.0625
5	83463823	-	UNKNOWN	intergenic	RNU4-72P	intergenic					0.901961
5	102671300	-	LINC00491	mRNA_lncRNA_TSS	RNU4-72P	LINC00491_exon, can be a real lincRNA TSS					0.912281
5	128082276	-	SLC12A2-DT	Intronic	RNU4-39P	SLC12A2-DT_intron					0.909091
5	139447907	+	RNU5B-4P	known snRNA snoRNA pseudogene	U5 pseudogene						0.0615385
5	157058370	-	HAVCR1	mRNA_lncRNA_TSS	U2 pseudogene	HAVCR1_intron or HAVCR1_exon, can be a real mRNA TSS							0.808824
5	157058476	-	HAVCR1	mRNA_lncRNA_TSS	U2 pseudogene	HAVCR1_intron or HAVCR1_exon, can be a real mRNA TSS							0.903654	0.951178
5	171510924	-	UNKNOWN	intergenic	U1, U1 variants, or U1 pseudogene	intergenic					0.142857
5	173766724	+	ENSG00000287003	Intronic	U3 pseudogene or U6 pseudogene	ENSG00000287003_intron				0.0196078			0.00990099	0.0204082
5	178884715	+	RNU1-39P	known snRNA snoRNA pseudogene	U1 pseudogene						0.185841
6	2972165	-	SERPINB6	mRNA_lncRNA_TSS	U3 pseudogene or U4 pseudogene	SERPINB6_exon, can be real mRNA TSS					0.916667
6	9012429	-	UNKNOWN	Intronic	U2 pseudogene	HULC_intron					0.41791					0.366667
6	13214056	+	RNU1-11P	known snRNA snoRNA pseudogene	U1 pseudogene			0.216667		0.286765	0.209945	0.389381	0.182432
6	24383279	-	UNKNOWN	intergenic	U2 pseudogene	intergenic				0.955224
6	24383288	-	UNKNOWN	intergenic	U2 pseudogene	intergenic				0.899889
6	24383293	-	UNKNOWN	intergenic	U2 pseudogene	intergenic				0.947059
6	24383321	-	UNKNOWN	intergenic	U2 pseudogene	intergenic				0.968254
6	32130992	-	UNKNOWN	intergenic	U2 pseudogene	intergenic		0.907609			0.950148
6	32131000	-	UNKNOWN	intergenic	U2 pseudogene	intergenic					0.967742
6	36639670	-	RNU1-88P	known snRNA snoRNA pseudogene	U1 pseudogene						0.145161		0.219048
6	36639672	-	RNU1-88P	known snRNA snoRNA pseudogene	U1 pseudogene		0.134195	0.0961989	0.336105	0.267347	0.134293	0.425076	0.193863	0.241687	0.16465	0.215589
6	57961621	+	ENSG00000225096	mRNA_lncRNA_TSS	U2 pseudogene or U6 pseudogene	ENSG00000225096 _exon, can be a real lncRNA TSS					0.969512
6	57961650	+	ENSG00000225096	mRNA_lncRNA_TSS	U2 pseudogene or U6 pseudogene	ENSG00000225096 _exon, can be a real lncRNA TSS					0.942529
6	65311145	-	EYS	Intronic	U2 pseudogene	EYS_intron		0.299145	0.442308	0.693878	0.447034	0.52459	0.525238	0.760924	0.539326	0.424091
6	84746713	+	UNKNOWN	Intronic	U6 pseudogene	TBX16_intron					0	0.00787402	0.0268456
6	91053170	-	UNKNOWN	intergenic	RNU4-72P	intergenic					0.921875
6	91053171	-	UNKNOWN	intergenic	RNU4-72P	intergenic					0.943038
6	95758391	+	UNKNOWN	intergenic	RNU4-72P	intergenic					0.892308
6	95758394	+	UNKNOWN	intergenic	RNU4-72P	intergenic					0.793103
6	95758398	+	UNKNOWN	intergenic	RNU4-72P	intergenic					0.875
6	99521922	-	TSTD3	Intronic	U6 pseudogene	TSTD3_intron	0.754098
6	133148073	+	UNKNOWN	intergenic	RNU4-72P	intergenic								1
6	135276954	-	UNKNOWN	intergenic	U2 pseudogene	intergenic			0.405405
7	12589328	+	SCIN	Intronic	RNU4-39P	SCIN_intron			0.875
7	48000241	-	SUN3	Intronic	U2 pseudogene or U4 pseudogene	SUN3_intron		1
7	54759974	-	SEC61G	mRNA_lncRNA_TSS	U6 pseudogene or U7 pseudogene	SEC61G_exon, can be a real mRNA TSS				0.943396	0.942387		0.928571	0.936508
7	100082571	-	ZNF3	mRNA_lncRNA_TSS	U2 pseudogene or U4 pseudogene	ZNF3_upstream, can be a real mRNA TSS					0.907407				0.92
7	104926600	-	LHFPL3-AS2	mRNA_lncRNA_TSS	snoRNA AP003179.1	LHFPL3-AS2_exon, can be a real TSS									0.883212
7	121050774	-	HMGN1P18	Intronic	U6 pseudogene	CPED1_intron							0.939394
7	129103700	-	UNKNOWN	Intronic	U4 pseudogene	KJ895888_intron	0.0566038	0.0550459	0.156863	0.136842	0.125592	0.304348	0.183673	0.186047	0.304348	0.0604274
7	129484506	+	RNU1-72P	known snRNA snoRNA pseudogene	U1 pseudogene						0.14		0.0980392
7	134527573	+	AKR1B10	antisense	U6 pseudogene	AKR1B10_antisense							0.932836
7	134527597	+	AKR1B10	antisense	U6 pseudogene	AKR1B10_antisense				0.878482	0.910959		0.920792		0.982249
7	134527602	+	AKR1B10	antisense	U6 pseudogene	AKR1B10_antisense							0.801339
7	134527610	+	AKR1B10	antisense	U6 pseudogene	AKR1B10_antisense							0.509804
7	134527627	+	AKR1B10	antisense	U6 pseudogene	AKR1B10_antisense							0.0188679
7	134527694	+	AKR1B10	antisense	U6 pseudogene	AKR1B10_antisense							0.0734345
7	134527695	+	AKR1B10	antisense	U6 pseudogene	AKR1B10_antisense							0.049095
7	134527696	+	AKR1B10	antisense	U6 pseudogene	AKR1B10_antisense							0.0724638
7	134527752	+	AKR1B10	antisense	U6 pseudogene	AKR1B10_antisense							0.96875
7	134527778	+	AKR1B10	antisense	U6 pseudogene	AKR1B10_antisense							0.83
7	134527806	+	AKR1B10	antisense	U6 pseudogene	AKR1B10_antisense							0.82266
7	141727984	+	RNU1-82P	known snRNA snoRNA pseudogene	U1 pseudogene			0.222222	0.377358	0.227273	0.177778	0.409303	0.188034	0.317073	0.142857
7	141738039	-	WEE2-AS1	Intronic	RNU6ATAC39P	WEE2-AS1_intron					0.892857
7	141738042	-	WEE2-AS1	Intronic	RNU6ATAC39P	WEE2-AS1_intron					0.916667
8	3183078	-	CSMD1	Intronic	U3 pseudogene or U6 pseudogene	CSMD1_intron			0.920635
8	11795945	+	FDFT1	mRNA_lncRNA_TSS	RNU6-781P	FDFT1_exon, can be a real mRNA TSS					0.931818
8	11795957	+	FDFT1	mRNA_lncRNA_TSS	RNU6-781P	FDFT1_exon, can be a real mRNA TSS	0.917808				0.940678
8	23600138	-	RNU4-71P	known snRNA snoRNA pseudogene	U4 pseudogene		0.0529101	0.050397	0.19337	0.155207	0.0975768	0.31042	0.187436	0.187877	0.244272	0.0421772
8	37330506	-	ENSG00000253123	exonic	U3 pseudogene or U6 pseudogene	ENSG00000253123_exon					0.838235
8	37330655	+	ENSG00000253123	antisense	U2 pseudogene or U4 pseudogene	ENSG00000253123_antisense					0.894737
8	39032718	+	ADAM9	Intronic	RNU4-72P	ADAM9_intron		0.824561
8	69222658	+	UNKNOWN	intergenic	U1, U1 variants, or U1 pseudogene	intergenic	0.283582	0.134973	0.372671	0.459652	0.159346	0.425275	0.223629	0.295483	0.222835	0.296599
8	69222660	+	UNKNOWN	intergenic	U1, U1 variants, or U1 pseudogene	intergenic	0.0733333	0.143529	0.325	0.273318	0.137812	0.408258	0.18792	0.245537	0.191094	0.205155
8	73006431	+	UNKNOWN	upstream	U1, U1 variants, or U1 pseudogene	TERF1_upstream					0.362069
8	73006435	+	UNKNOWN	upstream	U1, U1 variants, or U1 pseudogene	TERF1_upstream					0.257143
8	80749694	-	RNU11-6P	known snRNA snoRNA pseudogene	U1 pseudogene						0.113333
8	106864156	-	UNKNOWN	intergenic	U2 pseudogene or U6 pseudogene	intergenic							0.00549451
8	123327205	-	ATAD2	Intronic	U2 pseudogene, U4 pseudogene, or U6 pseudogene	ATAD2_intron					0.0163934
8	127999131	+	RNVU1-32	known snRNA snoRNA pseudogene	U1 pseudogene		0.110221	0.130366	0.292731	0.287227	0.139941	0.397452	0.204307	0.271404	0.178944	0.183929
8	127999133	+	RNVU1-32	known snRNA snoRNA pseudogene	U1 pseudogene						0.196429
9	22303053	-	UNKNOWN	intergenic	U5 pseudogene	intergenic					0.0576923					0.212121
9	35491962	-	ENSG00000287287	Intronic	U2 pseudogene, U4 pseudogene, or U6 pseudogene	RUSC2_intron							0.902778
9	86423128	-	RNU2-36P	known snRNA snoRNA pseudogene	U2 pseudogene		0.223881	0.33201	0.356021	0.588558	0.411116	0.454349	0.530212	0.743651	0.2875	0.398869
9	87030290	+	UNKNOWN	Intronic	U1, U1 variants, or U1 pseudogene	LINC02893_intron		0.216216	0.368932	0.295455	0.315522	0.44	0.172131	0.258315	0.254335	0.285053
9	108884838	-	ELP1	Intronic	U6 pseudogene	ELP1_intron				0.841415
9	109972891	+	PALM2AKAP2	Intronic	U5 pseudogene	PALM2AKAP2_intron								0.564976
9	129587810	+	UNKNOWN	intergenic	U2 pseudogene, U3 pseudogene, or U6 pseudogene	intergenic		0.897059
9	130170724	-	NCS1	intergenic	U3 pseudogene, U4 pseudogene, or U6 pseudogene	intergenic						0.02
9	132421628	+	RNU5D-2P	known snRNA snoRNA pseudogene	U5 pseudogene		0.0350877			0.120482	0.0412957	0.274611	0.10223
10	6506430	+	UNKNOWN	Intronic	U5 pseudogene	PRACQ_intron							0.176471
10	28090050	-	MPP7	Intronic	snoRNA AP000272.1	MPP7_intron		0.701754
10	30558007	-	UNKNOWN	intergenic	U2 pseudogene, U4 pseudogene, or U6 pseudogene	intergenic								0.0338983
10	32982551	+	ITGB1-DT	Intronic	U2 pseudogene or snoRNA (AC092960.2-201)	ITGB1-DT_intron (positive strand) or ITGB1_intron (negative strand)				0.919643			0.932841
10	84003332	+	RNU1-65P	known snRNA snoRNA pseudogene	U1 pseudogene						0.282958	0.411765	0.232143
10	92006466	-	UNKNOWN	Intronic	U1, U1 variants, or U1 pseudogene	BTAF1_intron					0.145161	0.4	0.191781
10	97634151	-	UNKNOWN	Intronic	U2 pseudogene	ENSG00000249967_intron					0.90566
10	101365035	-	RNU2-59P	known snRNA snoRNA pseudogene	U2 pseudogene						0.465753		0.569106
10	109869858	+	RNU4-5P	known snRNA snoRNA pseudogene	U4 pseudogene			0.0340136		0.121212	0.140553	0.327869	0.16827	0.184812	0.178571	0.0168239
11	62840396	-	WDR74	Intronic	RNU4-39P	WDR74_intron				0.971831
11	62841809	-	RNU2-2P	known snRNA snoRNA pseudogene	U2 pseudogene		0.289855	0.351371	0.356275	0.499776	0.310504	0.384164	0.454064	0.73932	0.277778	0.425124
11	65614989	-	MAP3K11	mRNA_lncRNA_TSS	U6 pseudogene or U7 pseudogene	MAP3K11_exon, can be a real mRNA TSS					0.935484
11	65614992	-	MAP3K11	mRNA_lncRNA_TSS	U6 pseudogene or U7 pseudogene	MAP3K11_exon, can be a real mRNA TSS					0.986111
11	65614994	-	MAP3K11	mRNA_lncRNA_TSS	U6 pseudogene or U7 pseudogene	MAP3K11_exon, can be a real mRNA TSS					0.921788
11	66615090	-	RNU4-39P	known snRNA snoRNA pseudogene	U4 pseudogene						0.0743802
11	105824634	+	RNU4-55P	known snRNA snoRNA pseudogene	U4 pseudogene		0.0232558	0.0330579	0.0945946	0.195768	0.0878681	0.203008	0.130952	0.185185	0.163636	0.0527348
12	781132	+	RNU4ATAC16P	known snRNA snoRNA pseudogene	U4ATAC pseudogene						0.292308
12	22838405	-	UNKNOWN	Intronic	U2 pseudogene, U3 pseudogene, or U4 pseudogene	LINC02955_intron	0.0149254			0.0306122
12	28319463	-	RNU4-54P	known snRNA snoRNA pseudogene	U4 pseudogene						0.0974026		0.203704
12	50488566	-	UNKNOWN	intergenic	U3 pseudogene	intergenic					0.0677966
12	55874678	+	UNKNOWN	intergenic	U1, U1 variants, or U1 pseudogene	intergenic		0.144684	0.445652	0.247423	0.158296	0.435692	0.178967	0.304836	0.189189	0.28259
12	55874680	+	UNKNOWN	intergenic	U1, U1 variants, or U1 pseudogene	intergenic					0.141026		0.259259
12	55930642	+	DGKA	Intronic	U6 pseudogene	DGKA_intron										0.9661
12	68911922	+	RNU7-4P	known snRNA snoRNA pseudogene	U7 pseudogene		0.329053	0.276556		0.363636	0.282895		0.339623	0.662099
12	79045646	-	ENSG00000257191	Intronic	RNU4-72P	SYT1_intron					0.84507
12	84894026	-	SLC6A15	Intronic	U2 pseudogene	SLC6A15_intron							0.5
12	87330806	-	UNKNOWN	intergenic	RNU6-781P	intergenic								0.981132
12	87330808	-	UNKNOWN	intergenic	RNU6-781P	intergenic								0.944444
12	91680121	+	ENSG00000258125	mRNA_lncRNA_TSS	U4 pseudogene	ENSG00000258125_upstream, can be real lncRNA TSS			0.858407
13	20065796	+	ZMYM2	Intronic	U1, U1 variants, or U1 pseudogene	ZMYM2_intron		0.208333		0.237288	0.212418	0.44086	0.18543	0.268817	0.211111	0.207792
13	21038667	-	RNU4-9P	known snRNA snoRNA pseudogene	U4 pseudogene		0.0542699	0.0465368	0.114035	0.107545	0.0979178	0.248809	0.204064	0.224319	0.0659341	0.0660436
13	46374590	-	RNU2-6P	known snRNA snoRNA pseudogene	U2 pseudogene			0.379747	0.512821	0.596398	0.413899	0.521739	0.580951
13	49495617	+	PHF11	mRNA_lncRNA_TSS	U2 or U4 pseudogene	PHF11_exon, can be a real mRNA TSS				0.949153	0.981481	0.969388
14	34546714	+	RNU1-27P	known snRNA snoRNA pseudogene	U1 pseudogene		0.11215	0.201613	0.403974	0.272174	0.164897	0.407512	0.172384	0.267767	0.159945	0.252443
14	55087621	-	UNKNOWN	intergenic	U3 pseudogene	intergenic		0.024	0.1375	0.12069	0.0209842	0.226513	0.103286	0.248188	0.0601504	0.184217
14	62022837	-	UNKNOWN	Intronic	U4 pseudogene	SYT16_intron					0.125		0.184211			0.0151515
14	65124542	-	RNU2-14P	known snRNA snoRNA pseudogene	U2 pseudogene								0.507042
14	68418116	-	UNKNOWN	Intronic	U5 pseudogene	RAD51B_intron					0.16092			0.342857		0.229508
14	88513498	+	RNU4-22P	known snRNA snoRNA pseudogene	U4 pseudogene						0.150685
15	69462747	-	DRAIC	Intronic	U6 pseudogene or U7 pseudogene	LINC02896_intron					0.933333
15	95745804	+	RNU2-3P	known snRNA snoRNA pseudogene	U2 pseudogene		0.301587	0.263158	0.375	0.644444	0.372708	0.490278	0.487837	0.8	0.40678	0.484276
16	396822	+	NME4	mRNA_lncRNA_TSS	U2 pseudogene or U6 pseudogene	NME4_exon, can a be real mRNA TSS						0.896552
16	396833	+	NME4	mRNA_lncRNA_TSS	U2 pseudogene or U6 pseudogene	NME4_exon, can a be real mRNA TSS					0.9875	0.945205
16	4355590	-	PAM16	mRNA_lncRNA_TSS	U2 pseudogene or U4 pseudogene	PAM16_exon, can be real mRNA TSS				0.974026	0.983607			1	1	0.994186
16	8112753	-	ENSG00000260289	mRNA_lncRNA_TSS	RNU4-39P	ENSG00000260289_upstream, can be a real lncRNA TSS			0.877095
16	65784106	+	UNKNOWN	intergenic	U1, U1 variants, or U1 pseudogene	intergenic	0.0792008	0.122121	0.321679	0.298964	0.152145	0.417843	0.215875	0.240877	0.19795	0.213987
16	65784108	+	UNKNOWN	intergenic	U1, U1 variants, or U1 pseudogene	intergenic					0.18
16	67999484	-	DPEP2	mRNA_lncRNA_TSS	RNU6-781P	DPEP2_intron or DPEP2_exon, can be a real mRNA TSS										0.953125
16	72821991	-	RNU7-71P	known snRNA snoRNA pseudogene	U7 pseudogene						0.277778
16	77298218	-	ADAMTS18	Intronic	U3 pseudogene	ADAMTS18_intron							0.0277778
17	4143218	+	CYB5D2	mRNA_lncRNA_TSS	U3 pseudogene or U7 pseudogene	CYB5D2_upstream, can be a real mRNA TSS					0.972632
17	16410811	+	UNKNOWN	intergenic	U2 pseudogene	intergenic				0.591976	0.480874
17	16410814	+	UNKNOWN	intergenic	U2 pseudogene	intergenic				0.00943396	0
17	28727937	-	TLCD1	mRNA_lncRNA_TSS	U6 pseudogene or U7 pseudogene	TLCD1_upstream, can be real mRNA TSS				0.827586	0.749164
17	41467956	+	RNU2-32P	known snRNA snoRNA pseudogene	U2 pseudogene			0.33081	0.417683	0.619013	0.450397	0.539474	0.525211	0.745284	0.387597	0.409442
17	45214447	-	FMNL1-DT	Intronic	U4 pseudogene	FMNL1-DT_intron					0.0958904		0.189189		0.196429	0.115942
17	58666695	-	RNU1-108P	known snRNA snoRNA pseudogene	U1 pseudogene				0.424157
17	58666697	-	RNU1-108P	known snRNA snoRNA pseudogene	U1 pseudogene			0.503937	0.510425				0.628472		0.605839
17	58679684	-	RNVU1-34	known snRNA snoRNA pseudogene	U1 pseudogene						0.388889
17	58679688	-	RNVU1-34	known snRNA snoRNA pseudogene	U1 pseudogene			0.349398			0.385502
17	58679690	-	RNVU1-34	known snRNA snoRNA pseudogene	U1 pseudogene			0.439057	0.458539	0.663077	0.552055	0.558236	0.585493	0.807692	0.409091	0.515558
17	60887478	-	BCAS3	Intronic	RNU4-72P	BCAS3_intron					0.884211
17	68258126	-	ARSG	known snRNA snoRNA pseudogene	U3 pseudogene	ARSG_upsteream					0.0961538
17	72226705	-	SOX9-AS1	Intronic	U1, U1 variants, or U1 pseudogene	SOX9-AS1_intron		0.0769231			0.100917	0.275862	0.151261
17	73351642	-	SDK2	Intronic	U5 pseudogene	SDK2_intron					0.0451977
17	75087059	+	UNKNOWN	mRNA_lncRNA_TSS	U3 pseudogene, U4 pseudogene, or U6 pseudogene	SLAC15A6_upstream, can be a real mRNA TSS		0.788732
17	75087061	+	UNKNOWN	mRNA_lncRNA_TSS	U3 pseudogene, U4 pseudogene, or U6 pseudogene	SLAC15A6_upstream, can be a real mRNA TSS		0.902655
17	82346390	-	UNKNOWN	intergenic	U3 pseudogene	intergenic				0.898734
19	860464	+	CFD	Intronic	U7 pseudogene	CFD_intron					0.958333
19	4725838	-	UNKNOWN	intergenic	U2 pseudogene, U6 pseudogene, or U7 pseudogene	intergenic		0.0185185				0.0508475
19	49675810	+	PRMT1	mRNA_lncRNA_TSS	U4 pseudogene	PRMT1_antisense or BCL2L12_upstram, can be a real mRNA TSS					0.931034
19	53865349	+	MYADM	Intronic	U2 pseudogene	MYADM_intron							0.974359
19	53865361	+	MYADM	Intronic	U2 pseudogene	MYADM_intron							0.917808
20	3160051	+	UBOX5	mRNA_lncRNA_TSS	U6 pseudogene, or U7 pseudogene	UBOX5_antisense or LZTS3_upstram, can be a real mRNA TSS					0.928571
20	6322046	+	UNKNOWN	intergenic	RNU4-39P	intergenic								0.981959
20	36633129	-	SLA2	Intronic	U2 pseudogene, or U6 pseudogene	SLA2_intron				0.966667
20	37178887	-	MROH8	Intronic	U3 pseudogene, U6 pseudogene, or U7 pseudogene	_intron					0.940299
20	53097652	+	RN7SKP184	known snRNA snoRNA pseudogene	7SK pseudogene						0.00625	0	0
20	63908955	+	RNU1-134P	known snRNA snoRNA pseudogene	U1 pseudogene						0.166667
21	44483004	+	ENSG00000289857	intergenic	U6 pseudogene	intergenic				0.926195
21	44483017	+	ENSG00000289857	intergenic	U6 pseudogene	intergenic				0.911392
21	44483027	+	ENSG00000289857	intergenic	U6 pseudogene	intergenic				0.807692
22	27793351	+	MN1	Intronic	U3 pseudogene	MN1_intron				0.157895	0.0171429					0.257732
22	39320380	-	RPL3	mRNA_lncRNA_TSS	AC126773.1 or U6 pseudogene	RPL3_exon, can be real mRNA TSS					0.932961
22	42565330	-	RN7SKP80	known snRNA snoRNA pseudogene	7SK pseudogene		0	0	0.0105263	0.0025641	0.00217457	0.00504572	0	0	0.00520833	0
22	50757213	+	RPL23AP7	mRNA_lncRNA_TSS	RNU4-72P	RPL23AP7_exon, can be a real mRNA TSS	0.686275
X	5314258	-	UNKNOWN	Intronic	U5 pseudogene	SHROOM4 _intron					0.109091		0.125
X	7427087	+	STS	Intronic	U1, U1 variants, or U1 pseudogene	STS_intron					0.33913
X	16875267	-	RNU4-6P	known snRNA snoRNA pseudogene	U4 pseudogene		0.0819672	0.0416354	0.173469	0.139263	0.116225	0.342054	0.165548	0.226738	0.11811	0.0700595
X	48081767	+	UNKNOWN	Intronic	U13 pseudogene	KJ892210_intron					0.428571		0.606742
X	91798093	+	RNU2-26P	known snRNA snoRNA pseudogene	U2 pseudogene			0.37931			0.405405		0.526316	0.773109		0.397202
X	98573815	+	LINC03077	Intronic	RNU4-86P	LINC03077_intron								0.957143
X	150902121	+	UNKNOWN	intergenic	U3 pseudogene	intergenic					0.0251046		0.101124			0.217391
Y	5019076	+	RNU2-57P	known snRNA snoRNA pseudogene	U2 pseudogene						0.32		0.450704	0.820513		0.423913
Y	18116848	+	RNU1-95P	known snRNA snoRNA pseudogene	U1 pseudogene										0.183673
