# Supplementary material for: Decoding m6Am by simultaneous transcription-start mapping and methylation quantification
Source: eLife. 2025 Mar 31;13:RP104139. doi: 10.7554/eLife.104139 (PMC11957539; doi:10.7554/eLife.104139)
Supplement: Supplementary file 1. [file elife-104139-supp1.xlsx]

## Sheet: Legends
Supplementary file 1. The overview of CROWN-seq libraries.
Sheet 1. Metadata for CROWN-seq libraries
Sheet 2. The statistics of non-conversion rates among CROWN-seq libraries

## Sheet: 1. Metadata
Sheet 1. Metadata of CROWN-Seq.
Sample	Unique mapped reads	A-TSN (coverage >=20)
HEK293T WT rep1	2888515	7591
HEK293T WT rep2	3532695	8867
HEK293T WT rep3	74384667	80118
HEK293T WT rep4	70369218	77033
A549 WT rep1	5999576	11485
A549 WT rep2	14797128	21613
A549 WT rep3	16801881	36090
HEK293T PCIF1 KO_rep1	6037254	9983
HEK293T PCIF1 KO_rep2	22187874	34852
HEK293T FTO KO_rep1	5714844	9460
HEK293T FTO KO_rep2	12637016	20889
Jurkat WT rep1	23157883	39815
Jurkat WT rep2	18531314	36033
Huh7 WT rep1	30837186	43121
Huh7 WT rep2	21024462	33731
K562 WT rep1	1313779	4541
K562 WT rep2	696854	2496
K562 WT rep3	16801881	28675
HT-29 WT rep1	22731823	33402
HT-29 WT rep2	5475802	14232
HCT-116 WT rep1	9127191	17568
HCT-116 WT rep2	17567774	31267
HepG2 WT rep1	29817178	44620
HepG2 WT rep2	36876831	52012
CCD841 CoN WT rep1	22440445	37797
CCD841 CoN WT rep2	27907503	43686

## Sheet: 2. Statistics
	Number of sites	Average	SD	25th percentile	Median	75th percentile
CCD841	31127	0.825359	0.174239	0.802942	0.878333	0.923312
HCT116	19485	0.876962	0.113137	0.850267	0.903659	0.941745
K562	14643	0.890925	0.101171	0.868421	0.913333	0.946033
HEK293T	58723	0.898224	0.128299	0.891892	0.934132	0.96
HepG2	34505	0.875253	0.202627	0.889113	0.947334	0.972443
A549	23786	0.914937	0.137233	0.916667	0.953307	0.97449
Huh7	28639	0.916937	0.13917	0.92029	0.954545	0.975087
HT29	19471	0.923967	0.122505	0.919355	0.956989	0.979167
Jurkat	27777	0.933742	0.119678	0.936508	0.967033	0.983051
